# Supplementary material for: Cell-autonomous restoration of splicing homeostasis and RP11 phenotype in patient-derived RPE and retinal organoids by PRPF31.AAV gene therapy
Source: bioRxiv preprint, doi:10.64898/2026.04.14.718379, version 1 (2026-04-16)
Supplement: Table S3 [file 718379_file05.xlsx]

## Sheet: TMT-based RPE proteomics
Table S3: TMT-based proteomics of PRPF31.AAV and GFP.AAV RPE cells
PRPF31-1	PRPF31-2	PRPF31-3	GFP1	GFP2	GFP3	Log2 fold change PRPF31/GFP	-Log p-value	Peptides	Unique peptides	Mol. weight [kDa]	Protein IDs	Gene names	Protein names	Peptide sequences
0.736216	0.752077	0.676391	0.678095	0.807424	0.685425	-0.025418	0.214304	6	2	20.434	A0A024RBG1	NUDT4B	Diphosphoinositol polyphosphate phosphohydrolase NUDT4B	EVYEEAGVK;EWFKVEDAIK;LLGIFEQNQDR;LLGIFEQNQDRK;SEQEDEVLLVSSSR;YPDQWIVPGGGMEPEEEPGGAAVR
2.23996	2.38423	2.34037	2.37378	2.33124	2.24731	-0.0392049	0.332391	11	11	28.17	P0DPI2;A0A0B4J2D5	GATD3;GATD3B	Glutamine amidotransferase-like class 1 domain-containing protein 3, mitochondrial;Putative glutamine amidotransferase-like class 1 domain-containing protein 3B, mitochondrial	EVVEAHVDQK;GGAEVQIFAPDVPQMHVIDHTK;GQPSEGESR;GVEVTVGHEQEEGGK;GVEVTVGHEQEEGGKWPYAGTAEAIK;ITDLANLSAANHDAAIFPGGFGAAK;KVLELTGK;NLSTFAVDGK;NVLTESAR;VLELTGK;WPYAGTAEAIK
-2.89439	-1.90381	-2.71113	-2.16609	-2.08351	-2.52864	-0.497151	1.49712	1	1	6.3133	A0A0B4J2F0	PIGBOS1	Protein PIGBOS1	MQLVQESEEK
-3.93601	-3.74908	-3.91705	-3.66026	-3.82088	-3.89774	-0.116372	0.738618	1	1	29.887	P0DPI3;A0A0U1RRI6;A0A0U1RR11	CENPVL2;CENPVL3;CENPVL1	Centromere protein V-like protein 2;Centromere protein V-like protein 3;Centromere protein V-like protein 1	HFLVPASR
-2.14133	-3.26711	-2.41181	-2.35225	-3.55766	-2.26686	0.471577	0.482802	3	3	217.77	A0A494C071	PWWP4	PWWP domain-containing DNA repair factor 4	SVSNTDK;TDIAPTPGALR;VALEILK
-1.23232	-1.24891	-1.22541	-1.22374	-1.22428	-1.25517	0.000864665	0.0250324	7	7	151.64	Q6ZSZ5;A0A590UK10	ARHGEF18	Rho guanine nucleotide exchange factor 18	ALQEELQFSSK;GGDPSETLQGELILK;GNLLLEQER;IIQNTEAGTEDYEDLTQALNLIK;LLLQQNK;LPTVLESELVQR;RQESLEEGSDR
-0.121607	-0.11496	0.0862188	-0.0600109	-0.0820589	0.0574131	0.0413024	0.198316	5	5	17.781	Q16540;A0AAG2SUK6	MRPL23	Large ribosomal subunit protein uL23m	GGVPSWFGL;LGGPQLR;NVVYPLYR;NYLEGIYNVPVAAVR;VQHGSNK
-0.388454	-0.248768	-0.388888	-0.255451	-0.27167	-0.370453	-0.10141	1.257	15	15	68.028	O43272;A0AAG2SXN7	PRODH	Proline dehydrogenase 1, mitochondrial	AAEIGYEDPINPTYEATNAMYHR;ALENSSLMK;EQPAAGPAAVPGGGSATAVRPPVPAVDFGNAQEAYR;FTEEEELQMTR;GAYLAQER;HEQLLYVSR;HLVVPNAQTGQLEPLLSR;LEVAVLQESVAK;LMVDAEQTYFQPAISR;LTLEMQR;QLLWLELLR;TGNLFHRPA;TYFYANEAK;VMVASHNEDTVR;YVPYGPVMEVLPYLSR
-1.41556	-1.55079	-1.45497	-1.52943	-1.48976	-1.54085	0.0661748	1.16444	6	6	77.672	O15226;A0AAG2UWQ9	NKRF	NF-kappa-B-repressing factor	EVNEQTHFASMPR;FEPVHFVASSSK;HAAADEALK;SESHTDLTFSR;TNPEYIYAPLK;VILESEVIAEAVGVK
0.783312	0.72155	0.670163	0.729588	0.614329	0.667488	0.0425835	0.366007	11	11	178.19	P39060;A0AAG2UXZ5	COL18A1	Collagen alpha-1(XVIII) chain;Endostatin;Non-collagenous domain 1	AAVPIVNLK;ADDILASPPR;AVGLAGTFR;DFQPVLHLVALNSPLSGGMR;EETGAALKPR;GTDNEVAALQPPVVQLHDSNPYPR;HPTWPQK;IFSFDGK;IFSFDGKDVLR;LQDLYSIVR;TEAPSATGQASSLLGGR
0.971188	0.902424	0.889825	0.910692	0.87449	0.929947	0.0243263	0.353855	16	16	64.098	A0AV96;Q9NQ94;Q8TBY0	RBM47	RNA-binding protein 47	DVYEDELVPVFEAVGR;DYAFVHFTSR;EEILEEIAK;ELNNYEIRPGR;GFAFVEYESHR;IPTAGIYGASYVPFAAPATATIATLQK;KREEILEEIAK;KYGGPPPGWEGPHPQR;LFIGGIPK;LMMDFDGK;NLMIETTEDTIKK;REEILEEIAK;TAEDSTAAMSSDSAAGSSAK;VPEGVAGAPNEAALLALMER;VTEGVLDVIVYASAADK;YGGPPPGWEGPHPQR
-1.26658	-1.1287	-1.26429	-1.22358	-1.19723	-1.23877	-0.0434513	1.61235	8	8	64.177	A0AVF1	IFT56	Intraflagellar transport protein 56	AAEAELK;AATGNTSEGEEAFLLIQSEK;DFTGAITLLEFK;EVLHLLR;GGEGALQVLPPLVDVIPEAR;LEELLSK;LLFHLAHK;SLMDNASSSFEFAK
2.49052	2.43239	2.4187	2.4364	2.3946	2.44734	0.0251122	0.402138	30	30	117.97	A0AVT1	UBA6	Ubiquitin-like modifier-activating enzyme 6	AILSNEATK;AVTIHDTEK;DGSLFWQSPK;EDFTLLDFINAVK;FDLNEPLHLSFLQNAAK;FISADVHGIWSR;FWQTYSSAEEVLQK;GDRYDALR;GMITVTDPDLIEK;IDAHLNK;IQEFKPSNK;KPDHVPISSEDER;KPNVGCQQDSEELLK;LETGQFLTFR;LKDGSLFWQSPK;LVKPTTEK;MLYVPVMPGHAK;MYSIEPADR;NAIFQLEK;NFALLGVGTSK;NLVLAGIK;QDVIITALDNVEAR;SFPAAIEHTIQWAR;SYTAADATLK;TVFFESLER;VTGGYPFEAYK;VVQTDETAR;YGIEPTMVVQGVK;YVLGDTAMQK;YYFSHDTD
1.93374	1.98924	1.95884	2.00131	1.99902	1.97803	-0.0471579	1.97916	22	22	102.36	A0FGR8	ESYT2	Extended synaptotagmin-2	ADKDQANDGLSSALLILYLDSAR;ALALLEDEER;AQPPEAGPQGLHDLGR;EPTPSIASDISLPIATQELR;ERPPDHQHSAQVK;FQLSNSGPNSTIK;GANTHLSTFSFTK;GWTQWYDLTEDGTRPQAMT;IHFIEAQDLQGK;IHFIEAQDLQGKDTYLK;ITVPLVSEVQIAQLR;LEWLTLMPNASNLDK;LLDEWFTLDEVPK;MYLLPDK;SDPYGIIR;SSSSLLASPGHISVK;TLDVAVK;TNEPVWEENFTFFIHNPK;VDVGQQPLR;VGNQIFQSR;VLVALASEELAK;VPLSQLLTSEDMTVSQR
-2.03725	-2.02223	-2.08337	-2.0234	-2.06541	-2.07447	-0.00621478	0.108985	5	5	164.2	A0JNW5	BLTP3B	Bridge-like lipid transfer protein family member 3B	DALLHHIK;FESGPGAVIHSLLAEK;FVIPSEVK;GNITPQLNK;HAHEQDTK
2.77931	2.43012	2.6609	2.51324	2.50375	2.53664	0.170163	1.62504	35	35	71.639	A0MZ66	SHTN1	Shootin-1	AESFAQEMFIEQNK;ALDENAK;ATQPETTEEVTDLK;ATQPETTEEVTDLKR;DQIVSVQEEK;EKATQPETTEEVTDLKR;ELEEQLENETLHK;ELRDQIVSVQEEK;EQAIGEYEDLR;EQAIGEYEDLRAENQK;ESAEALATK;GILGTLNK;HSVDELQK;ILAIELENLK;KAESFAQEMFIEQNK;KILAIELENLK;KLEEFQK;KVTAEADSSSPTGILATSESK;LTQQLEEER;LVEVIEEVNK;LVEVIEEVNKVK;QAVEEMMDR;QQLELLEEDKK;QQLELLEEDKKELELK;QSHLLLQSSIPDQQLLK;SKLVEVIEEVNK;SLDPENSETELER;SLMSMIR;SMPVLGSVSSVTK;TKPESSK;TLEAEFNSPSPPTP…
-1.23879	-1.47973	-1.37401	-1.49697	-1.37535	-1.34912	0.081967	0.581361	3	3	22.049	A0PJW6	TMEM223	Transmembrane protein 223	GEVPAMLPLK;LFDNTVGAYR;TGHFPNTK
0.319881	0.0124035	0.194312	0.0378113	0.0999498	0.0969734	0.138172	1.11793	5	5	11.88	A0PJW8	DAPL1	Death-associated protein-like 1	ANEVQDLLSPR;FPATVHMAHQKPTPALEK;IYIIQQPR;KQEIGTLER;TSAIANVAK
-2.58879	-2.11514	-2.57909	-2.31669	-2.27252	-2.48447	-0.246737	1.65693	1	1	40.245	A0PK00	TMEM120B	Transmembrane protein 120B	EWHELEGEFQELQETHR
0.819986	0.929253	0.8931	1.03802	0.871686	0.874868	-0.10544	0.709629	14	14	76.277	A1IGU5	ARHGEF37	Rho guanine nucleotide exchange factor 37	AEGSMAQLPHHHVPEPAFR;ALLGPQNLIK;AVSALQDVNTNINEYK;DLHLEAFLK;GQIVAILQNK;GYVPAGK;ILENTVPDASAYPVLQR;INTHTLSK;LLDFERVEEK;LLEVGSVTYQEEAAR;LQLYHVVPSAEELR;LQLYHVVPSAEELRR;SFQETFEK;WLVDTGGHR
-5.19964	-5.09689	-5.12709	-5.07576	-4.91738	-5.24697	-0.0755593	0.316332	1	1	163.68	A1KZ92	PXDNL	Probable oxidoreductase PXDNL	AGEIFEHTLQLIR
1.96824	1.86268	1.86381	1.85777	1.88867	1.90822	0.00923284	0.081442	26	26	67.867	A1L0T0	ILVBL	2-hydroxyacyl-CoA lyase 2	AAMGLGAR;AAVETLGVPCFLGGMAR;AKRPLMVLGSQALLTPTSADK;DGHPVVVNILIGR;DIVPTLR;EMVPAKPPK;ENEDQVVK;EQVPSLGSNVACGLAYTDYHK;GALQAVDQLSLFRPLCK;HEVTAVFAADAMAR;HGGENVAAVLR;HKIPVMALVGNDAGWTQISR;IPVMALVGNDAGWTQISR;KADVIVLAGTVCDFR;LGLFYQLLHK;LSGTVGVAAVTAGPGLTNTVTAVK;LVEGLQGQTWAPDWVEELR;LVEGLQGQTWAPDWVEELREADR;NAQMAQSPILLLGGAASTLLQNR;NHPLHIR;NREEMLLNSDIFWKPQEAVQGDVGSFVLK;RPLMVLGSQALLTPTSADK;RPLMVLGSQALLTPTSADKLR;VL…
-3.06478	-3.17922	-3.15373	-3.23821	-3.20786	-3.2004	0.0913734	1.34212	3	3	29.057	A1L170	C1orf226	Uncharacterized protein C1orf226	LDPPPPITR;RKEPSSLGSVGVTEINK;SVLQETFPR
0.850201	0.597231	0.596868	0.633009	0.536395	0.656368	0.0897223	0.451146	11	11	134.41	A1L390	PLEKHG3	Pleckstrin homology domain-containing family G member 3	AAAGPAHHK;EAILEMDSYYPNR;ESALSTR;GPDLTTYGELVLEGTFR;GPLSPFNSR;LILENHHATIPQK;LQEIQSLLINWK;SIVEDYLLK;SYYENAEHHDAGFSVR;TFFLFDK;YHLLLQEIAK
-1.87046	-1.33584	-1.90814	-1.56319	-1.53062	-1.68657	-0.255837	1.81325	2	2	33.356	A1L3X0	ELOVL7	Very long chain fatty acid elongase 7	AFSDLTSR;TVHLYDNWIK
0.93054	0.902727	0.90916	0.890982	0.93587	0.915554	0.00402196	0.0997298	14	14	101.58	A1X283;Q5TCZ1	SH3PXD2B	SH3 and PX domain-containing protein 2B	AAAASVPNADGLK;AAPTPGR;AKPFLSNSLGGQDDTR;ALLVPPK;EGWAPASYLK;EGWAPATFIDK;FEGRPVPDGDAK;GAVVEVIQK;GPQCEGHESR;GSLGPWGTGK;IIPFLPGK;SGGDQTSVDPMVLEQYVVVANYQK;SVPVPLQEAPQQRPVVPPR;YTVIYPYTAR
2.06555	2.0227	2.00198	1.97381	2.05208	2.03428	0.00253677	0.026604	39	39	268.57	A2RRP1	NBAS	NBAS subunit of NRZ tethering complex	AEEIEHYAR;AQDLHLFETLK;AVLQAVSDGQWWK;AVQEDEVGVPGSNSADLLR;DDFTSIIGK;EAGHEAEAGSLLLAVR;EGLGNEVLK;ELLQYGLK;EYLVTLAK;FTADDQYKR;GDLKFPLK;GTDLEALLAIGK;GTHQAFR;GYGDKTEATTK;HEHEAWPEDLISLTK;HFIEKPR;IVDHLLASLQQGR;KLLTYLDR;KQPPVSESHWR;LATYEEILGVPHASEQR;LFWTGDPHLIK;LHPGDLITVVDAVTFSPK;LLDFTQAQILQGLR;LLGLAELLR;LLTYLDR;LSIWAIPSLK;LTDENMSPLEALEPVLSSQNILSISK;MVVEPNLQDESEFLYAAQPELLR;QSPGVANELLK;SAVNVASIQNYLSK;STTPEE…
-4.6579	-4.68579	-4.75913	-4.63993	-4.70434	-4.65854	-0.0827936	0.691282	7	4	92.644	A2RTX5	TARS3	Threonine--tRNA ligase 2, cytoplasmic	AILGSVER;FADFGVLHR;IYGISFPDNK;MIAILSENYGGK;TTPYQVAAEISQELAESTVIAK;WPFWLSPR
-7.8768	-7.4015	-7.51621	-7.43389	-7.39352	-7.41205	-0.267111	1.1847	2	2	41.933	A2RU49	HYKK	Hydroxylysine kinase	EIVEHVIHLFK;GDNTASLVSVDSGSEIK
-1.99001	-1.7192	-1.96506	-1.94603	-1.71545	-1.88146	-0.105586	0.652334	5	5	135.89	A2RUS2	DENND3	DENN domain-containing protein 3	IFPTDLVK;IPEIHFPLESK;LISEILDKPHEASK;LSYFDKMSNEMPMTLPETTLETLK;STDDNVDIPDVPLLAAQTFIQR
-5.90184	-5.47972	-5.66432	-5.60575	-5.56131	-5.58942	-0.148177	0.801002	3	3	16.765	A2VDF0	FUOM	Fucose mutarotase	GLQTPVWTEYESILR;GVLALNPLL;GVPALLSPELLYALAR
2.28619	2.23549	2.19349	2.23556	2.19824	2.20311	0.00477091	0.0439665	50	50	214.82	A3KMH1	VWA8	von Willebrand factor A domain-containing protein 8	DFLLGEHLLLVGNQGVGK;DGLIVYEDSPLVK;DIYYLPFKDQLK;DLLGQDVFLIGPPGPLR;DPQVNAFAIFIGSLGDQATR;DTTVQTLTLQPSVK;DVTPPQTSGYIEVTDLQSK;EILINTLHK;EKVPNVPQEALDK;ELTLPEQTFMGYWTIGQAR;EMQLEDGR;ENVVVIHPDFR;ETQDPTAQSLAASLSTR;EVEYIALSR;EVVNIVK;EYIQLHR;FIQTLSHK;FLPSLAR;FPTEGLSSVVR;GNSLTVLDVLEGR;GPALINIQEYPIER;GQVVLHEQQSNVILLLDTTGR;HQATGELDDAK;IADKEVTIK;IGAVSAPIYNAHEK;IIDGLTGEK;IILDNLQAK;ILPPGEVPLKDIYPK;ISSDQLSSEHLSSAVEQ…
-2.30174	-2.35475	-2.4207	-2.38303	-2.40781	-2.37806	0.00506592	0.0405134	9	7	154.31	A3KN83	SBNO1	Protein strawberry notch homolog 1	AGFLIGDGAGVGK;GMSWEEATK;GVLQSLIEK;IEEVLLSQSYVK;LGIWGEGTPFR;NILVHSLNK;SELDVPVEILNITEK;SIDPDSIQSALLASGLGSK;SNQVTAPEYVFLISELAGEQR
-1.10097	-1.20838	-1.24325	-1.23466	-1.22504	-1.29288	0.0620918	0.560793	6	6	42.932	A4D1E9	GTPBP10	GTP-binding protein 10	DFLHLFEK;IIGELNKENDR;IIHLDLK;ILVAQGGLGGK;LIADVGLVGFPNAGK;QISVADLPGLIEGAHMNK
0.857138	0.756098	0.768182	0.740166	0.755696	0.769327	0.0462221	0.721084	16	16	83.343	A4D1P6	WDR91	WD repeat-containing protein 91	EEQQPEEEEALVQHK;FIQWNIHK;GFTHTLR;GKDPTSGAK;KPEASGPEAEPCPELHTEPVEPLTR;LEDIYRPTIHK;LFALQAEIHR;LLLLGSGVGTVR;LLLWDTK;LSPAQGPPQPQSSAK;LTTLLAHK;LYDTEAK;LYDTEAKK;SLLSGLATGESGWSQHR;SPLLSLEWATK;VSEYSLPSDATGPFVLSGYSGYK
-2.65245	-2.39968	-2.66158	-2.46581	-2.47556	-2.56997	-0.13144	1.52438	3	3	27.202	A4D2B0	MBLAC1	Metallo-beta-lactamase domain-containing protein 1	GPILVDTGGPWAR;LGPGLEVWATPGHGGQR;YLPHGLGEGQPLR
-1.47443	-2.0154	-1.72231	-1.96063	-1.95416	-1.92494	0.280243	1.32128	3	3	382.3	A4UGR9	XIRP2	Xin actin-binding repeat-containing protein 2	DEYMSRQLTSTVSVK;EYLEWDEILK;MEGFHIK
-4.63323	-4.46549	-4.66606	-4.58289	-4.51717	-4.59506	-0.0699441	1.10242	3	3	31.135	A5PLL7	PEDS1	Plasmanylethanolamine desaturase 1	EHHIDPTAITR;RLEDLIQGLTGEKPR;WGAQHAGAR
-0.557386	-0.529247	-0.58779	-0.550289	-0.48067	-0.598829	-0.0527681	0.550099	6	6	46.523	A5PLN9	TRAPPC13	Trafficking protein particle complex subunit 13	AYLQPMDTR;FQVLKPLDVK;LQTSQLQR;LTDTFLK;MEVNPPKQEHLLALK;QEHLLALK
2.921	2.84028	2.83856	2.84672	2.8731	2.85833	0.00503222	0.0594114	54	54	266.94	A5YKK6	CNOT1	CCR4-NOT transcription complex subunit 1	AAANFSDR;AFSAFVGQMHQQGILK;AGPEMDKR;APPEDDNR;APPEDDNREIATWK;AQAEQQHNPAANPTMIR;ASQQEIQHIVNR;AVEGLLDATSGADADLLLR;AVQELVHPVVDR;DAIAALGLLQK;DFALDSEESR;DLDSYLK;DVPPSINTTNIDTLLVATDQTER;EIDDEANSYFQR;ELHITACLFGGIIEK;ELNPSLNFK;EPLLMSISTNLK;EVTAAQVAR;EVTYELDHPGFQIR;EWVNLYHSAAAGR;GAFGVGQEQIDAFLK;GEQYDQAK;GFAAQFIK;GLHNVVYGIQR;GNAPEGLPQLMEVVR;GQQELLYVVPFVAK;IAFIFNNLSQSNMTQK;ILDVAQDLK;ILLVDER;ILPDSGGVAK;ILTNFTG…
0.316576	0.293982	0.202237	0.34428	0.223763	0.249119	-0.0204169	0.152791	3	1	14.688	Q9GZQ8;A6NCE7	MAP1LC3B;MAP1LC3B2	Microtubule-associated proteins 1A/1B light chain 3B;Microtubule-associated proteins 1A/1B light chain 3 beta 2	FLVPDHVNMSELIK;IPVIIER;QLPVLDK
-4.98677	-4.90211	-5.19777	-5.112	-4.93406	-5.24832	0.0235656	0.0746218	1	1	30.48	A6NCS6	C2orf72	Uncharacterized protein C2orf72	AGAALVGVLVAEAGPEDAVAPGLR
0.125271	0.101557	0.0552282	0.0460091	0.023139	0.0472412	0.0346622	0.560795	7	7	34.006	A6NDG6	PGP	Glycerol-3-phosphate phosphatase	AVEMAAQR;AVVVGFDPHFSYMK;GETAVPGAPEALR;LAGAPAPK;LGFITNNSSK;QADIIGKPSR;TILTLTGVSTLGDVK
-3.11464	-3.0557	-2.98507	-2.98634	-3.12352	-3.16574	0.0441167	0.267964	1	1	41.114	Q99687;A8K0S8;O00470;O14770;A6NDR6	MEIS3;MEIS3P2;MEIS1;MEIS2;MEIS3P1	Homeobox protein Meis3;Putative homeobox protein Meis3-like 2;Homeobox protein Meis1;Homeobox protein Meis2;Putative homeobox protein Meis3-like 1	FHLLELEK
-2.46649	-2.33819	-2.31893	-2.29188	-2.39052	-2.35839	-0.00631396	0.0328217	5	5	33.62	A6NDU8	RIMOC1	RAB7A-interacting MON1-CCZ1 complex subunit 1	AAAVSSVVR;ELISFLSEPEILVK;ENNMHPK;LLCGEEK;QILNFFHHR
-1.11971	-0.281284	-0.872678	-0.394386	-0.540019	-0.731838	-0.419948	1.57262	3	3	40.078	A6NED2	RCCD1	RCC1 domain-containing protein 1	AGPGPEALLQVWAAESALR;APFYRPLAPELR;GEPLWAQNVVPEAEGEDDPAGEAQAGR
-4.56658	-3.80623	-4.54881	-3.94857	-4.10276	-4.37637	-0.404524	1.49093	1	1	28.732	A6NGC4	TLCD2	TLC domain-containing protein 2	GLHWGLR
-4.66239	-5.00043	-4.67928	-4.90295	-4.74111	-4.76023	0.0864582	0.567896	5	1	49.908	A6NHL2	TUBAL3	Tubulin alpha chain-like 3	EDAANNYAR;FDLMYAK;LDHKFDLMYAK;LDHKFDLMYAKR;SFGGGTGSGFTSLLMER
0.231192	-0.0881748	0.131179	-0.00819778	0.0166235	0.0891304	0.12159	1.16245	9	8	34.803	A6NHQ2	FBLL1	rRNA/tRNA 2-O-methyltransferase fibrillarin-like protein 1	DHAVVVGVYRPLPK;DLVNVAK;GAEDALVTLNMVPGQSVYGER;GGGGDGGGQGGK;IVALNAHTFLR;KLQQENLKPQEQLTLEPYER;LAAAILGGVDQIHIKPK;RVTVTEGGVK;TNIIPVLEDAR
1.58741	1.57666	1.47464	1.54142	1.55806	1.51398	-0.0164115	0.170968	37	37	226.37	A6NHR9	SMCHD1	Structural maintenance of chromosomes flexible hinge domain-containing protein 1	AHVEGDGVVEGIIR;ANLGVFSVFAPR;DSTEYFIVFEPR;DVAPVEK;EFALWLK;EHLLQGLLPDVQVPTSVK;EINITSALAEK;EKESELGDRPLQVGER;FIPGPPGNK;FSFGLLDLPFR;FVITTTSR;GEHTLQVK;GSGDVLGK;GSNEEDTDTPLFIGK;GVITRPDLPSK;IAHLAQIEDDR;IDFLPHYDTLVK;IHNIDIPTTQQVPHIEALLK;IKPPTPAVSNVR;KPSDSVHITNDDER;KQELDEHEK;LLFDETQGKPAVAVIDNGR;LLLIDWPELK;LLPGHPR;LLPSSHVAR;LMILPDPEKPVR;LPGTSHGGSK;LQIFSVEGQK;LTFMDLELK;LYFKPIGDPVFAR;QQVLPLDSIYK;SIIEGPIIK;SLN…
-4.44441	-4.62027	-4.44477	-4.52993	-4.5701	-4.3831	0.105028	0.592202	2	1	36.056	A6NHX0	CASTOR2	Cytosolic arginine sensor for mTORC1 subunit 2	ESIPLFTYGLIK;MELHILEHR
-3.39908	-3.06558	-3.36716	-3.17701	-3.20885	-3.3	-0.149157	1.75154	4	4	98.568	A6NI28	ARHGAP42	Rho GTPase-activating protein 42	AQEETVAAMMNIK;EMLDILIK;GLPTLEFSDSYLDSPDFR;LIQNANDVLIAPLEK
-0.117056	-0.442822	-0.307115	-0.367443	-0.423812	-0.298281	0.124273	0.809234	7	6	28.136	A6NIH7	UNC119B	Protein unc-119 homolog B	AAAAASAAGPGGLVAGK;AAAAASAAGPGGLVAGKEEK;AGGGVLNR;LMIENPYETR;QAPHHAADDGVGAAVTEQELLALDTIRPEHVLR;SDSFYFVDNK;YQFTPAFLR
-7.06139	-7.72096	-7.47612	-7.5255	-7.4349	-7.81552	0.215133	0.470729	1	1	45.124	A6NIX2	WTIP	Wilms tumor protein 1-interacting protein	AGADEAALLLAGLALR
-5.59252	-5.96539	-6.03941	-6.0081	-6.03634	-6.01503	0.124679	0.340033	2	2	25.195	A6NK58	LIPT2	Octanoyl-[acyl-carrier-protein]:protein N-octanoyltransferase LIPT2, mitochondrial	GGLTPEETAR;VPYAELLGLQDR
0.143475	0.104946	0.138997	0.129438	0.127416	0.136919	0.0282466	0.693985	7	7	45.209	A6NKD9	CCDC85C	Coiled-coil domain-containing protein 85C	AALAATGAASGGGGGGGGAGSR;AKPAATAAAASEELSQVPDEELLR;ELVLLLDEER;LLEGDKLLAQQAGSGEFR;LQDDNQELR;LQQHLLEIR;VGLMLEHGGLMR
-1.58302	-1.46645	-1.61856	-1.50947	-1.51591	-1.56229	-0.082613	1.6733	33	1	197.48	A6NKT7;Q7Z3J3	RGPD3;RGPD4	RanBP2-like and GRIP domain-containing protein 3;RanBP2-like and GRIP domain-containing protein 4	AVVSPPK;DSLITPHVSR;ELLESFDSALQSAK;FDAEVSQWK;FKTPELAEEFK;FVFGSESVK;GFSGAGEK;IAVAVLEETTR;ILDDSDSNLSVVK;ILQNYDNK;KIFDEAK;KLPVPLESVK;KVEHLAVR;KVLPLLK;LFPGSPAIYK;LFSSQYGK;LLLDIPLQTPHK;LLVQHEINTLR;LPVPLESVK;LQDVADSFK;LQDVADSFKK;NADSEIK;NSIPEPIDPLFK;RIFSSEK;SGQSALYDALFSSQSPK;SNNSETSSVAQSGSESK;STSGEGFQFGK;SVELNPTQK;TPELAEEFK;WAEDQNSLLK;YDKDVGQWK;YDVGAIR;YSLSPSK
-2.86381	-2.52337	-2.8872	-2.62924	-2.57466	-2.81456	-0.217376	1.36518	6	6	197.3	A7E2V4	ZSWIM8	Zinc finger SWIM domain-containing protein 8	APAFHQLVQR;GREPEGVWNLLSIVR;IAFWSFPENEEDIR;LAYQESEVAALLK;LIHLTPADYDDFVNAIR;QVAFHIPFEVVEK
-5.01923	-2.3264	-3.82784	-2.48218	-2.71092	-3.45199	-1.36069	1.30988	3	3	230.53	A7KAX9	ARHGAP32	Rho GTPase-activating protein 32	EDQSVSSSQSK;ELPNPLLTYQLYEK;GADVPEIPGDLTLK
-1.82486	-2.01031	-1.92169	-1.98514	-2.02331	-1.95692	0.0924676	1.06423	4	3	125.09	A8CG34;Q96HA1;A6NF01;Q6PJE2	POM121C;POM121;POM121B	Nuclear envelope pore membrane protein POM 121C;Nuclear envelope pore membrane protein POM 121;Putative nuclear envelope pore membrane protein POM 121B	AADTTPR;ASLQWFNQALEDK;ETVLSALK
-5.11147	-5.22167	-5.31847	-5.09977	-5.19172	-5.21559	-0.110886	0.51119	2	2	34.466	A8MPS7	YDJC	Carbohydrate deacetylase	GASSLLGPEGFFLGK;HSIPTGLHANLSEGRPVGPAR
-0.134466	-0.453154	-0.330789	-0.398756	-0.438533	-0.365005	0.114233	0.635432	4	4	9.3738	A8MSI8	LYRM9	LYR motif-containing protein 9	AIEDADWIMNK;GIQQHYK;RPLQLYR;VHSDEDNPER
0.532057	0.557711	0.521142	0.60317	0.596082	0.597006	-0.075133	3.98568	7	7	46.962	A8MV23	SERPINE3	Serpin E3	ADRPFIYFLR;AKIEVLEEGTK;ASGATALLLLK;GISGQDGFYVSEAIHK;IEVLEEGTK;IQNQFNLK;SILNSWGVTDLFDPLK
-1.45941	-1.25266	-1.57997	-1.39927	-1.36649	-1.43948	-0.14183	1.40086	3	3	87.434	A8MVW0	FAM171A2	Protein FAM171A2	GGESAGLK;LALSEDTEPSSSESR;TLLAAGTTDSEGVATLPLSYR
0.27396	0.200716	0.246413	0.237642	0.197421	0.241093	0.0093867	0.113122	5	4	8.496	P62308;A8MWD9	SNRPG;SNRPGP15	Small nuclear ribonucleoprotein G;Putative small nuclear ribonucleoprotein G-like protein 15	AHPPELK;GNSIIMLEALER;GNSIIMLEALERV;HVQGILR
0.950539	0.940262	0.882052	0.956203	0.882081	0.873474	0.0135104	0.153486	12	12	42.233	A8MXV4	NUDT19	Acyl-coenzyme A diphosphatase NUDT19	ALEGLER;EAFEEAGVLLLRPR;EIWLPPPQFYEVR;EPPPVYPDLAEVVGYQWSSPSEATESFLSK;HLYDIHVTVQPK;KTEEIMK;LANFASLSDLHK;SADWLGLFAPHHGPPR;SPHQGFMPGAHVFSGGVLDAADR;SSSLRPGPSR;TAFPSLPDTDDHKTDNTGTLPEDVAFR;TSPPGPAPGPGLALEPPPGLASWR
-0.520662	-0.383938	-0.476253	-0.4163	-0.446719	-0.565983	-0.0406316	0.328253	5	5	25.423	A9UHW6	MIF4GD	MIF4G domain-containing protein	IQSFDAETQQLLK;LQQEYQAR;TALKDPGAVDLEK;VGEQLEK;YYYSEVSD
-3.97412	-3.79258	-3.86657	-3.86617	-3.75511	-3.81339	-0.0870123	0.810631	2	2	32.387	B0YJ81	HACD1	Very-long-chain (3R)-3-hydroxyacyl-CoA dehydratase 1	KVLHGEVIVEKDD;VLHGEVIVEKDD
-1.58795	-1.00825	-1.45177	-1.15716	-1.13307	-1.33702	-0.281223	1.59299	2	2	8.749	B2RUZ4	SMIM1	Small integral membrane protein 1	DGVSLGAVSSTEEASR;MQPQESHVHYSR
-1.0556	-1.16949	-1.21599	-1.1241	-1.19895	-1.18782	0.0174103	0.11593	6	6	52.916	P0CG08;B7ZAQ6	GPR89B;GPR89A	Golgi pH regulator B;Golgi pH regulator A	GEVHNKPSGFWGMIK;HGILSIEQLISR;LGDPFPILSPK;LLQTMDMIISK;NVTDTDILALER;QLFLETADLYATK
-4.60825	-4.63394	-4.68408	-4.5597	-4.65166	-4.55792	-0.0276737	0.227718	2	2	38.018	B7ZBB8	PPP1R3G	Protein phosphatase 1 regulatory subunit 3G	AEDLEQLGGLLAAAAVAAPLSAPPSR;LRPLFQLPGPSAAAER
0.107023	-0.0372562	0.0619974	-0.0106144	1.43051e-05	-0.00778198	0.071565	1.42909	8	8	49.994	C4AMC7;Q6VEQ5;A8K0Z3;Q9NQA3;A0AAG2TVC3;A8MWX3	WASH3P;WASH2P;WASHC1;WASH6P	Putative WAS protein family homolog 3;WAS protein family homolog 2;WASH complex subunit 1;WAS protein family homolog 6	ATLLESIR;EEAVQQMADALQYLQK;GPGAGEGPGGAFAR;HRPLDER;LQEYGSIFTGAQDPGLQR;MQHSLAGQTYAVPLIQPDLR;REEAVQQMADALQYLQK;YVFLDPLAGAVTK
-5.07814	-5.52072	-5.29513	-5.39084	-5.40735	-5.33587	0.109745	0.449123	1	1	15.2	C9J7I0	UMAD1	UBAP1-MVB12-associated (UMA)-domain containing protein 1	KPSVPETEADGFVLLGDTTDEQR
-0.172684	-0.280064	-0.121568	-0.232121	-0.180121	-0.180239	0.0821679	0.985166	6	6	10.92	C9JLW8	MCRIP1	Mapk-regulated corepressor-interacting protein 1	FIYEAWQGVER;GLVEEYVEK;GQVPGGER;SPPSSSEIFTPAHEENVR;TFKPIDLSDLK;TFKPIDLSDLKR
-3.63244	-3.20481	-3.53012	-3.35907	-3.44994	-3.61649	-0.133862	0.714848	1	1	77.213	P23142;CON__ENSEMBL:ENSBTAP00000016046	FBLN1	Fibulin-1	GYHLNEEGTR
-1.6008	-1.04481	-1.40362	-0.856358	-1.25645	-1.23599	-0.37728	1.24518	13	1	51.561	P02533;CON__P02533;P19012;CON__Q6IFX2;CON__P19012	KRT14;KRT15	Keratin, type I cytoskeletal 14;Keratin, type I cytoskeletal 15	ALEEANADLEVK;APSTYGGGLSVSSSR;EELAYLK;EVATNSELVQSGK;LAADDFR;LASYLDK;LASYLDKVR;LEQEIATYR;MSVEADINGLR;MSVEADINGLRR;RVLDELTLAR;VLDELTLAR;VTMQNLNDR
-1.78665	-2.06184	-2.04594	-1.5868	-2.17183	-1.8161	-0.0700763	0.139106	13	1	60.044	P02538;P48668;CON__P48668;CON__P02538;CON__P04259;P04259	KRT6A;KRT6C;KRT6B	Keratin, type II cytoskeletal 6A;Keratin, type II cytoskeletal 6C;Keratin, type II cytoskeletal 6B	AEAESWYQTK;AIGGGLSSVGGGSSTIK;AQYEEIAQR;EYQELMNVK;FASFIDK;FLEQQNK;NKYEDEINK;NKYEDEINKR;NLDLDSIIAEVK;QLDSIVGER;WTLLQEQGTK;YEDEINK;YEDEINKR
5.4559	5.19828	5.34051	5.29828	5.30347	5.31299	0.0855465	1.16694	51	40	53.704	P05787;CON__P05787;CON__H-INV:HIT000292931;CON__Q9H552;CON__H-INV:HIT000016045;Q9NSB2;CON__REFSEQ:XP_092267;CON__Q9NSB2;CON__Q6ISB0	KRT8	Keratin, type II cytoskeletal 8	AEAESMYQIK;AKQDMAR;AQYEDIANR;ASLEAAIADAEQR;ASLEAAIADAEQRGELAIK;ASLEAAIADAEQRGELAIKDANAK;DVDEAYMNK;DVDEAYMNKVELESR;ELQSQISDTSVVLSMDNSR;EYQELMNVK;FASFIDK;FLEQQNK;GELAIKDANAK;HGDDLRR;ISSSSFSR;KDVDEAYMNK;KDVDEAYMNKVELESR;KLLEGEESR;KLLEGEESRLESGMQNMSIHTK;LEAELGNMQGLVEDFK;LEGLTDEINFLR;LESGMQNMSIHTK;LKLEAELGNMQGLVEDFK;LLEGEESR;LLEGEESRLESGMQNMSIHTK;LQAEIEGLK;LQAEIEGLKGQR;LSELEAALQR;LVSESSDVLPK;NKYEDEINK…
-2.11507	-2.23833	-2.08776	-2.18541	-2.16436	-2.10593	0.0779425	0.982984	2	0	26.558	P07477;CON__P07477;Q8NHM4	PRSS1;PRSS3P2	Serine protease 1;Alpha-trypsin chain 1;Alpha-trypsin chain 2;Putative trypsin-6	LGEHNIEVLEGNEQFINAAK;NKPGVYTK
2.53574	1.44534	2.47228	2.29254	1.44893	2.78596	0.120495	0.097513	32	25	58.826	P13645;CON__P13645;CON__P02535-1;Q7Z3Y7;CON__Q7Z3Y7;Q7Z3Y9;CON__Q7Z3Y9	KRT10	Keratin, type I cytoskeletal 10	ADLEMQIESLTEELAYLKK;AETECQNTEYQQLLDIK;ALEESNYELEGK;DAEAWFNEK;ELTTEIDNNIEQISSYK;ELTTEIDNNIEQISSYKSEITELRR;GSLGGGFSSGGFSGGSFSR;HGNSHQGEPR;IKEWYEK;IRLENEIQTYR;KDAEAWFNEK;KNHEEEMKDLR;LAADDFR;LASYLDK;LASYLDKVR;LENEIQTYR;NHEEEMKDLR;NVQALEIELQSQLALK;NVSTGDVNVEMNAAPGVDLTQLLNNMR;QSLEASLAETEGR;QSVEADINGLR;QSVEADINGLRR;RVLDELTLTK;SEITELR;SKELTTEIDNNIEQISSYK;SLLEGEGSSGGGGR;SQYEQLAEQNR;SQYEQLAEQNRK;SSSSGSVGES…
-2.36433	-2.37158	-2.37159	-1.893	-2.4451	-2.0245	-0.33534	0.824539	13	2	62.378	P13647;CON__P13647	KRT5	Keratin, type II cytoskeletal 5	AKQDMAR;AQYEEIANR;FASFIDK;FLEQQNK;LAELEEALQK;NKYEDEINK;NKYEDEINKR;NLDLDSIIAEVK;QLDSIVGER;WTLLQEQGTK;YEDEINK;YEDEINKR;YEELQQTAGR
1.30191	0.953953	1.5591	2.52438	1.04645	0.960102	-0.209829	0.147513	18	17	62.064	P35527;CON__P35527	KRT9	Keratin, type I cytoskeletal 9	DIENQYETQITQIEHEVSSSGQEVQSSAK;EIETYHNLLEGGQEDFESSGAGK;FSSSSGYGGGSSR;GGSGGSHGGGSGFGGESGGSYGGGEEASGSGGGYGGGSGK;GGSGGSYGGGGSGGGYGGGSGSR;GGSGGSYGR;HGVQELEIELQSQLSK;IKFEMEQNLR;IQDWYDK;IQDWYDKK;LASYLDK;QEYEQLIAK;QGVDADINGLR;QVLDNLTMEK;SGGGGGGGLGSGGSIR;STMQELNSR;TLLDIDNTR;VQALEEANNDLENK
2.34445	1.48665	2.28514	2.2442	1.43843	2.7299	0.0254141	0.0208424	30	20	65.432	P35908;CON__P35908v2;CON__P35908	KRT2	Keratin, type II cytoskeletal 2 epidermal	AAFGGSGGR;AQYEEIAQR;DVDNAYMIK;DYQELMNVK;FASFIDK;FLEQQNQVLQTK;GFSSGSAVVSGGSR;GGGFGGGSSFGGGSGFSGGGFGGGGFGGGR;GGSGGGGSISGGGYGSGGGSGGR;GGSISGGGYGSGGGK;GGSSSGGGYGSGGGGSSSVK;GSSSGGGYSSGSSSYGSGGR;HGGGGGGFGGGGFGSR;IEISELNR;LNDLEEALQQAK;LQGEIAHVK;NLDLDSIIAEVK;NVQDAIADAEQRGEHALK;SKEEAEALYHSK;SLVGLGGTK;TAAENDFVTLK;TAAENDFVTLKK;VDLLNQEIEFLK;VDPEIQNVK;VLYDAEISQIHQSVTDTNVILSMDNSR;YEDEINK;YEDEINKR;YEELQVTVGR;YG…
-2.03395	-1.82712	-1.73415	-1.81017	-1.65758	-1.78236	-0.0885321	0.337146	3	2	55.802	P78386;CON__P78386;O43790;Q14533;P78385;CON__Q61726;CON__O43790;CON__Q6NT21;CON__P78385;CON__Q14533	KRT85;KRT86;KRT81;KRT83	Keratin, type II cuticular Hb5;Keratin, type II cuticular Hb6;Keratin, type II cuticular Hb1;Keratin, type II cuticular Hb3	ATAENEFVVLKK;FAAFIDK;FLEQQNK
4.1222	3.75202	3.99245	3.95771	4.01931	3.90373	0.13542	1.00614	38	6	51.385	P08729;CON__Q3KNV1;Q14CN4;CON__Q14CN4-1;CON__Q6IME9	KRT7	Keratin, type II cytoskeletal 7	AEAEAWYQTK;AKLEAAIAEAEER;AKLEAAIAEAEERGELALK;AKQEELEAALQR;AQYEEMAK;DVDAAYMSK;EVTINQSLLAPLR;EYQELMSVK;FASFIDK;FETLQAQAGK;FLEQQNK;GQLEALQVDGGR;GQLEALQVDGGRLEAELR;KDVDAAYMSK;KLLEGEESR;LDADPSLQR;LEAAIAEAEER;LEAAIAEAEERGELALK;LLEGEESR;LPDIFEAQIAGLR;LQAEIDNIK;NEISEMNR;NKYEDEINHR;QEELEAALQR;QEESEQIK;SAYGGPVGAGIR;SIHFSSPVFTSR;SLDLDGIIAEVK;SMQDVVEDFK;SMQDVVEDFKNK;SMQDVVEDFKNKYEDEINHR;TAAENEFVVLK;TAAENEFVV…
-4.77527	-4.78622	-4.47256	-4.58389	-4.46086	-4.67867	-0.0263392	0.0846785	1	1	54.305	P04004;CON__Q3ZBS7	VTN	Vitronectin;Vitronectin V65 subunit;Vitronectin V10 subunit;Somatomedin-B	DVWGIEGPIDAAFTR
-2.03959	-2.24234	-2.06286	-1.9949	-2.07224	-2.09994	0.0206642	0.224303	7	5	50.525	Q6KB66;CON__Q6KB66-1	KRT80	Keratin, type II cytoskeletal 80	GQLEANLLQVLEK;LAQLEAALQQAK;SLEEAEAYSR;SLESFVELMK;SQLEEQAAR;TAEEQGELAFQDAK;VTVNPGLLVPLDVK
-7.68918	-6.65158	-6.87106	-6.34869	-8.19695	-7.61307	0.000216802	0.000116977	3	3	282.39	Q86YZ3;CON__Q86YZ3	HRNR	Hornerin	GEQHGSSSGSSSSYGQHGSGSR;GPYESGSGHSSGLGHR;SSSGSSSSYGQHGSGSR
-0.577957	-0.934801	-0.761283	-0.919334	-1.00089	-0.813438	0.216345	1.27039	3	1	50.36	Q92764;CON__Q92764;CON__Q497I4	KRT35	Keratin, type I cuticular Ha5	ETMQSLNDR;LAADDFR;LAGYLEK
-1.78955	-1.74241	-1.8651	-1.78206	-1.70982	-1.85502	-0.05568	0.502519	5	1	53.511	Q99456;CON__Q99456	KRT12	Keratin, type I cytoskeletal 12	ALEEANTELENK;LASYLDK;LASYLDKVR;SEVTDLR;SEVTDLRR
1.7527	1.51071	1.64923	1.63424	1.56876	1.63542	0.0941836	1.17768	8	8	205.42	E9PAV3;Q9BZK3	NACA	Nascent polypeptide-associated complex subunit alpha, muscle-specific form	DIELVMSQANVSR;GVTLPPK;IEDLSQQAQLAAAEK;NILFVITKPDVYK;NNSNDIVNAIMELTM;QVTGVTR;SPASDTYIVFGEAK;VQGEAVSNIQENTQTPTVQEESEEEEVDETGVEVK
-1.22352	-1.03689	-1.32331	-1.22634	-1.11109	-1.25717	-0.0996691	0.788428	3	3	14.234	E9PRG8	C11orf98	Uncharacterized protein C11orf98	APQDVEMKDLEDES;TAMEVEAPSKPAR;VVGAVIDQGLITR
-5.62433	-5.7036	-5.67163	-5.64769	-5.64164	-5.83669	0.0101411	0.0417521	2	2	61.903	Q6P9H4;G9CGD6	CNKSR3;CNK3/IPCEF1	Connector enhancer of kinase suppressor of ras 3;CNK3/IPCEF1 fusion protein	APFTGITDFSVTK;ENPTGVVLLLK
-3.46696	-3.04051	-3.36261	-2.36138	-2.79382	-3.01588	-0.706606	1.65106	1	1	56.103	I3L273	GFY	Golgi-associated olfactory signaling regulator	LPTSDSPGMVELK
-1.38872	-1.65817	-1.57386	-1.62764	-1.55858	-1.55605	0.0839558	0.625552	3	3	11.25	L0R819	ASDURF	ASNSD1 upstream open reading frame protein	EYQEIENLDK;IVVDELSNLK;IVVDELSNLKK
1.38345	1.05367	1.34321	1.29017	1.19354	1.22554	0.0881914	0.827154	3	3	39.58	O00115	DNASE2	Deoxyribonuclease-2-alpha	AFQPLVK;ALINSPEGAVGR;YLDESSGGWR
2.19733	2.14983	2.11828	2.15716	2.08549	2.13664	0.0292034	0.39406	20	20	72.911	O00116	AGPS	Alkyldihydroxyacetonephosphate synthase, peroxisomal	AASAATAAPTATPAAQESGTIPK;ASLNPSDTPPSVVNEDFLHDLK;ASLNPSDTPPSVVNEDFLHDLKETNISYSQEADDR;ESISDVGFGMLK;ETNISYSQEADDR;EWIQNTLGVNVEHK;EYVDPNNIFGNR;GFDPNQLSVATLLFEGDR;GFDPNQLSVATLLFEGDREK;GISDPLTVFEQTEAAAR;GQIELTGK;ILWVDENNLTAHVEAGITGQELER;IPDIVLWPTCHDDVVK;IRPVPEYQK;KGQIELTGK;KNIYGNIEDLVVHIK;NIYGNIEDLVVHIK;QVYDIAAK;RYPLSGMGLPTFK;TIISLDTSQMNR
1.6046	1.48621	1.53663	1.49638	1.53193	1.54111	0.0371997	0.646084	23	23	79.954	O00139;Q99661	KIF2A	Kinesin-like protein KIF2A	AALQEEEQASK;ATANFGK;AVFQESIR;DLDVITIPSK;DLDVITIPSKDVVMVHEPK;DSFIGENSR;DVFLMLK;DVVMVHEPK;ELTVDPTAAGDVRPIMHHPPNQIDDLETQWGVGSSPQR;FDYAFDDSAPNEMVYR;FSLIDLAGNER;FTARPLVETIFER;GIYALAAR;GSLDYRPLTTADPIDEHR;IDILTELR;IDILTELRDK;LEGAEINK;NKPHTPFR;RLQQQELR;TSGQTSANAHSSR;VFDLLNR;VLEDGKQQVQVVGLQER;YLENQTFR
-1.44711	-1.53438	-1.49792	-1.60297	-1.36513	-1.54839	0.00901794	0.0396901	4	4	31.004	O00142	TK2	Thymidine kinase 2, mitochondrial	GHNPLGLMYHDASR;GSLFPMAAPVLVIEADHHMER;MLELFEQNR;MLELFEQNRDR
-3.39382	-2.95063	-3.28627	-3.0725	-3.03924	-3.18998	-0.243092	1.92846	19	6	49.129	O00148	DDX39A	ATP-dependent RNA helicase DDX39A	AEQDVENDLLDYDEEEEPQAPQESTPAPPK;AEQDVENDLLDYDEEEEPQAPQESTPAPPKK;DEEVLKK;DFLLKPELLR;DVQEIFR;ELAFQISK;FMQDPMEVFVDDETK;GLAITFVSDENDAK;GSYVSIHSSGFR;ILNDVQDR;ILVATNLFGR;KDEEVLK;KDEEVLKK;KFMQDPMEVFVDDETK;LTLHGLQQYYVK;MLEQLDMR;RDVQEIFR;VNIVFNYDMPEDSDTYLHR;VSVFFGGLSIK
1.07897	0.881212	1.07758	0.802006	1.0483	0.98974	0.120922	0.738911	9	9	36.071	O00151	PDLIM1	PDZ and LIM domain protein 1	GHFFVEDQIYCEK;LVGGKDFEQPLAISR;MNLASEPQEVLHIGSAHNR;TTQQIDLQGPGPWGFR;VAASIGNAQK;VITNQYNNPAGLYSSENISNFNNALESK;VTPPEGYEVVTVFPK;VWSPLVTEEGK;VWSPLVTEEGKR
1.5826	1.36638	1.38498	1.36765	1.39009	1.39835	0.111025	0.87392	12	12	41.796	O00154;Q6ZUV0	ACOT7	Cytosolic acyl coenzyme A thioester hydrolase	AASAFFTYVSLSQEGR;ATLWYVPLSLK;IMRPDDANVAGNVHGGTILK;LMDEVAGIVAAR;MIEEAGAIISTR;MTFTSNK;RQGHAEPQP;SLPVPQLVPETEDEK;SLPVPQLVPETEDEKK;SLPVPQLVPETEDEKKR;TNIVTASVDAINFHDK;VLEVPPVVYSR
3.70895	3.51022	3.6077	3.56453	3.5764	3.59422	0.0702515	1.0316	44	44	121.68	O00159	MYO1C	Unconventional myosin-Ic	AVASEIFK;DGTIDFTPGSELLITK;DLQIYSR;DNYPQSVPR;DQAVMISGESGAGK;DVESPSWR;EASELLR;FDEVLIR;GAPVGGHILSYLLEK;GDVVLQSDHVIETLTK;GEELLSPLNLEQAAYAR;GVSFYEVPPHLFAVADTVYR;HHPHFLTHK;HLGYKPEEYK;KDNYPQSVPR;KRPETVATQFK;KYEAFLQR;LGTDEISPR;LLQSNPVLEAFGNAK;LLSVEGSTLR;MSLLQLVEILQSK;NFHIFYQLLEGGEEETLR;NFHIFYQLLEGGEEETLRR;NGHLAVVAPR;NPQSYLYLVK;QKGDVVLQSDHVIETLTK;QLLLTPNAVVIVEDAK;QPGRFDEVLIR;RDQAVMISGESGAGK;RPETVATQFK;SEQ…
1.37171	0.989689	1.20722	1.07442	1.05626	1.11621	0.172422	1.31391	15	15	23.354	O00161	SNAP23	Synaptosomal-associated protein 23	AHQITDESLESTR;AHQITDESLESTRR;DMALNIGNEIDAQNPQIK;DRIDIANAR;EDEMEENLTQVGSILGNLK;IDIANAR;IEEGLDQINK;IEEGLDQINKDMR;ILGLAIESQDAGIK;ITDKADTNR;ITNDAREDEMEENLTQVGSILGNLK;MDNLSSEEIQQR;TITMLDEQK;TITMLDEQKEQLNR;TLTELNK
-2.23713	-1.85457	-2.20497	-1.90222	-1.85102	-2.15498	-0.255086	1.26683	6	6	31.62	O00165	HAX1	HCLS1-associated protein X-1	FHDNFGFDDLVR;IFGGVLESDAR;ITKPDGIVEER;SLFDLFR;TREDNDLDSQVSQEGLGPVLQPQPK;YPDSHQPR
-1.40736	-2.33252	-1.7238	-1.98099	-2.25727	-1.74261	0.404793	1.08084	1	1	10.441	O00168	FXYD1	Phospholemman	TGEPDEEEGTFR
0.413286	0.288685	0.424607	0.365084	0.382071	0.344576	0.0436929	1.27863	12	12	37.664	O00170	AIP	AH receptor-interacting protein	AHAAVWNAQEAQADFAK;AVPLIHQEGNR;EHSSLGHADLDALQQNPQPLIFHMEMLK;GELPDFQDGTK;GKPMELIIGK;HVVLYPLVAK;LREDGIQK;NIAVGKDPLEGQR;TLHSDDEGTVLDDSR;VESPGTYQQDPWAMTDEEK;VIQEGRGELPDFQDGTK;VLELDPALAPVVSR
1.44298	1.46796	1.41607	1.43322	1.42768	1.41343	-0.00475566	0.128101	12	11	72.453	O00178;Q9NS37	GTPBP1	GTP-binding protein 1	AAAAAAR;AVGTITK;DDVIVTASNFSSER;GGQTASFALK;KIPVLVQSK;LVLVSPTSEQYDSLLR;MFLNLLSPR;SMAEQIEADVILLR;STLLGVLTHGELDNGR;TPEYLHIDQR;VGDNDFLEVR;VITFIDLAGHEK
-2.93647	-3.16641	-2.94217	-2.97798	-3.11647	-2.97011	0.0819486	0.795957	7	7	39.518	O00182;Q6DKI2;Q3B8N2	LGALS9	Galectin-9	FDENAVVR;KTHMPFQK;LEVGGDIQLTHVQT;NLPTINR;NTQIDNSWGSEER;SILLSGTVLPSAQR;VAVDGQHLFEYYHR
1.79186	1.55	1.66271	1.61806	1.57151	1.65381	0.0904516	0.847236	20	20	67.764	O00186;REV__Q2LD37	STXBP3	Syntaxin-binding protein 3	ALYFITPTSK;ANYLEDR;ANYLEDRK;DIMEDAIDNR;DIMEDAIDNRLDSK;EAILEEEDDLWVR;EKEAILEEEDDLWVR;GKTHSQLLIIDR;IENESDMIR;IMLLDEFTTK;KLEDYYK;KLLDDIK;LAQLVEK;SAEETFQLSR;SKPLDNASK;SVDCFLHDFASK;TEQDLALGTDAEGQK;THSQLLIIDR;TSLSALTQLMK;VLLPVLLNK
-0.893631	-0.662455	-0.857512	-0.72534	-0.688262	-0.827505	-0.121646	1.31078	4	4	49.976	O00189	AP4M1	AP-4 complex subunit mu-1	AELAEGALR;GVVSLSQELSSPEQK;LHLPLPR;YQLSDDLPSPLPFR
3.02692	2.78431	2.90012	2.81187	2.8214	2.87469	0.103875	1.02084	38	38	104.64	O00192	ARVCF	Splicing regulator ARVCF	AASHVLQTVWSYK;AVAIALR;AYEDTADDGGELADERPAFPMVTAPLAQPER;AYLSSGGGFPEGPEPR;DAEWTTVFK;DGEMDRNFDTLDLPK;DLIGSYAMAELVR;DSPSYGSLSR;DVIPMDALGPDGYSTVDR;DVIPMDALGPDGYSTVDRR;EAFPVGPEPGPPGGR;ELVTGTLWNLSSYEPLK;EPNEDSKPR;EVPGADRYQEAEPGPLGSAVGSQR;FQAEPYGLEDDTR;FQSAAATAK;GALSPGGFDDSTLPLVDK;GASSAGEASEKEPLK;GASSAGEASEKEPLKLDPSR;GFELLYQPEVVR;GGGPVATLSR;GLGMRPPR;GLPLLVALLDHPR;GLPVLVELLQSETDK;GLPVLVELLQSETDKVVR;GSMGSLD…
0.815117	0.725559	0.759282	0.715382	0.757142	0.741705	0.0367584	0.708359	6	6	20.332	O00193	SMAP	Small acidic protein	ESHPHGVK;INEELESQYQQSMDSK;KINEELESQYQQSMDSK;LVIGDHK;SASPDDDLGSSNWEAADLGNEER;TGEEDKKINEELESQYQQSMDSK
3.51022	3.23638	3.43067	3.29656	3.26057	3.33376	0.134637	1.26774	50	40	121.32	O00203	AP3B1	AP-3 complex subunit beta-1	AKQENSAK;ALKDPNQLIR;ATGYLELSNWPEVAPDPSVR;DHFQLGTLSHTLNIK;DRDHFQLGTLSHTLNIK;EASADLSPYVR;EFQTYVK;EGSTAQLIINTEK;ELKPVLSQG;EMLIEVIEK;EVQYIVLQNIATMSIQR;EWTPAGK;GKNASELFPAVVK;GLAAHYFFPR;GMFEPYLK;IAPDVLR;IAPDVLRK;IENIHIGEK;IFLAQKPAPLLESPFK;IFLAQKPAPLLESPFKDR;IVGMIAK;KGMFEPYLK;KIENIHIGEK;KKPYTMDPDHR;KPYTMDPDHR;LEILTNLANEANISTLLR;LLDSITVPVAR;LLQMQPAQHGEIIK;LLTQYILNLGK;LQILNLGAK;LYLTNSK;LYSLDPEQK;NAAHAIQK;…
-4.1962	-4.24685	-4.22166	-4.16004	-4.25736	-4.21927	0.0108064	0.131605	3	3	77.243	O00213	APBB1	Amyloid beta precursor protein binding family B member 1	DLLLQLEDETLK;LVDVPFQVEFPAPK;LVEPQSQALLHAQPIISIR
-2.50259	-2.50455	-2.55384	-2.54505	-2.50736	-2.50836	0.00434621	0.0661717	3	3	35.808	O00214	LGALS8	Galectin-8	ADVAFHFNPR;IDTLGIYGK;SKDIALHLNPR
0.96464	0.521641	0.857324	0.693468	0.649392	0.710817	0.208181	2.17452	7	7	23.705	O00217	NDUFS8	NADH dehydrogenase [ubiquinone] iron-sulfur protein 8, mitochondrial	EPATINYPFEK;FRGEHALR;GLGMTLSYLFR;RYPSGEER;TLLWTELFR;YDIDMTK;YVNMQDPEMDMK
3.38072	3.14938	3.28079	3.21758	3.21187	3.27634	0.0813052	0.998833	30	30	47.463	O00231	PSMD11	26S proteasome non-ATPase regulatory subunit 11	AAAAVVEFQR;AALTSAR;AELRDDPIISTHLAK;ALLVEVQLLESK;AQSLLSTDR;AQSLLSTDREASIDILHSIVK;DDPIISTHLAK;DIQENDEEAVQVK;EASIDILHSIVK;EQSILELGSLLAK;FHGILDQGEGVLIIFDEPPVDK;IMLNTPEDVQALVSGK;KFHGILDQGEGVLIIFDEPPVDK;LQATLDMQSGIIHAAEEK;LQATLDMQSGIIHAAEEKDWK;LSQMILDK;LVSLYFDTK;LYDNLLEQNLIR;RDIQENDEEAVQVK;RYQEALHLGSQLLR;SLADFEK;TAYSYFYEAFEGYDSIDSPK;TGQAAELGGLLK;TYEAALETIQNMSK;TYHALSNLPK;VIEPFSR;VQIEHISSLIK;VVDSLYNK;YQ…
2.67484	2.44565	2.49549	2.47041	2.48358	2.50113	0.0716756	0.528087	21	21	52.904	O00232	PSMD12	26S proteasome non-ATPase regulatory subunit 12	AIYDTPCIQAESEK;DPNNLLNDWSQK;EAASILQELQVETYGSMEK;EEMIHNLQ;EQNGDVK;ERVEFILEQMR;EWDLLNENIMLLSK;FFQEENTEK;GSLESPATDVFGSTEEGEK;GSLESPATDVFGSTEEGEKR;IYVEIER;KGSLESPATDVFGSTEEGEKR;LFTTMELMR;LNSLMSLVNK;MEVDYSATVDQR;SVVLYVILAPFDNEQSDLVHR;TASDMVSTSR;TTHLIAK;VEFILEQMR;VVEHNIR;WSTLVEDYGMELR
1.35517	0.863119	1.1742	0.935741	0.95905	1.02798	0.253539	1.65759	8	8	24.682	O00233	PSMD9	26S proteasome non-ATPase regulatory subunit 9	ANYDVLESQK;DMAEAHK;KEEIEAQIK;KLGQSESQGPPR;LGQSESQGPPR;QVEEALHQLHAR;RKEEIEAQIK;SDVDLYQVR
0.959702	0.236988	0.769156	0.469755	0.432136	0.591328	0.322972	1.71685	5	5	7.4016	O00244	ATOX1	Copper transport protein ATOX1	TVSYLGLE;VCIESEHSMDTLLATLK;VCIESEHSMDTLLATLKK;YDIDLPNK;YDIDLPNKK
-3.20625	-3.13134	-3.26313	-3.23655	-3.1819	-3.22099	-0.0447044	0.613359	4	4	67.496	O00255	MEN1	Menin	GAVDLSLYPR;GLGTGQGAVSGPPR;KPPGTVAGTAR;VSTPSDYTLSFLK
-2.52485	-2.85848	-2.8072	-2.77672	-2.94377	-2.86263	0.122436	0.440296	3	3	19.779	O00258	GET1	Guided entry of tail-anchored proteins factor 1	AEIQDMK;DAEQESQMR;ILLPSFSSFMSR
2.93606	2.17228	2.73243	2.33304	2.48375	2.52175	0.321969	1.41985	13	13	21.671	O00264	PGRMC1	Membrane-associated progesterone receptor component 1	DFTPAELR;DFTPAELRR;EGEEPTVYSDEEEPKDESAR;FDGVQDPR;FYGPEGPYGVFAGR;GDQPAASGDSDDDEPPPLPR;ILMAINGK;IVRGDQPAASGDSDDDEPPPLPR;KFYGPEGPYGVFAGR;LLKEGEEPTVYSDEEEPKDESAR;RDFTPAELR;RDFTPAELRR;RFDGVQDPR
1.46343	1.42239	1.44185	1.42943	1.42858	1.43603	0.0147196	0.719549	26	26	121	O00267	SUPT5H	Transcription elongation factor SPT5	DVTNFTVGGFAPMSPR;EATGVLLSIDGEDGIVR;EMTDVLK;ETFQVLNMYGK;FAVALDSEQNNIHVK;FEGDTGLIVR;FIAYQFTDTPLQIK;GIYKDDIAQVDYVEPSQNTISLK;GYIGVVK;GYIYVEAYK;HEDLKDMLEFPAQELR;ILSVDGNK;ISQGPYK;KFIAYQFTDTPLQIK;MDLDEQLK;QAIEGVGNLR;RDNELIGQTVR;SLGGDVASDGDFLIFEGNR;SSVGETVYGGSDELSDDITQQQLLPGVK;SVVAPEHVK;TPAQSGAWDPNNPNTPSR;TPHYGSQTPLHDGSR;TPMYGSQTPLQDGSR;VEENFVILFSDLTMHELK;VIDGPHSGR;VVSISSEHLEPITPTK
-5.57936	-5.99872	-5.82063	-5.94575	-5.82549	-5.88643	0.150586	0.81579	3	3	110.11	O00268	TAF4	Transcription initiation factor TFIID subunit 4	ALSAVSAQAAAAQK;ELNSSPQPYLVPFLK;FFEQLDQIEK
0.352831	0.227043	0.233907	0.15254	0.300113	0.227974	0.0524661	0.39197	8	8	36.521	O00273	DFFA	DNA fragmentation factor subunit alpha	AAFGEEVDAVDTGISR;ASPPGDLQNPK;ETSSDVALASHILTALR;FVALASNEK;LQHTLQQVLDQR;LQHTLQQVLDQREEVR;MEVTGDAGVPESGEIR;QAPELSLSSQDLELVTK
-2.81863	-3.03354	-2.83115	-2.90919	-2.96004	-2.77609	0.0604512	0.476231	2	2	28.232	O00287	RFXAP	Regulatory factor X-associated protein	LEESADNILSIVK;SPEVVQFLQK
1.72772	1.57635	1.65366	1.5673	1.61342	1.6471	0.0606944	0.738224	22	21	116.22	O00291	HIP1	Huntingtin-interacting protein 1	ADKDSPNLAQLQQASR;AELDELRR;AIGEELLPR;AINTQEVAVK;AQLENMK;AVGWGATVMVDAADLVVQGR;EEELSALRK;ELEDSLER;ELQDTQLK;ETLAYLASLEEEGSLENADSTAMR;GHVSELEADLAEQQHLR;GVNQATAGVVASTISGK;IEEMLSK;ISDQGQR;KTQEQLEVLESLK;KTQEQLEVLESLKQELATSQR;LIQIPQLPENPPNFLR;QAQVDLER;VKADKDSPNLAQLQQASR;VLELENELQK;WTEGLISASK;YSELVQNHADLLR
2.58986	2.18374	2.45065	2.26721	2.31755	2.34664	0.176332	1.43361	16	16	26.922	O00299	CLIC1	Chloride intracellular channel protein 1	AEEQPQVELFVK;AGSDGAK;EEFASTCPDDEEIELAYEQVAK;FLDGNELTLADCNLLPK;GFTIPEAFR;GVTFNVTTVDTK;GVTFNVTTVDTKR;IGNCPFSQR;KFLDGNELTLADCNLLPK;LAALNPESNTAGLDIFAK;LFMVLWLK;NSNPALNDNLEK;RTETVQK;VLDNYLTSPLPEEVDETSAEDEGVSQR;VLDNYLTSPLPEEVDETSAEDEGVSQRK;YLSNAYAR
1.39216	0.986774	1.24747	1.08339	1.0654	1.21665	0.180653	1.28845	10	10	37.563	O00303	EIF3F	Eukaryotic translation initiation factor 3 subunit F	AYVSTLMGVPGR;FLMSLVNQVPK;IGVDLIMK;LHPVILASIVDSYER;NMYELHK;TMGVMFTPLTVK;VIGLSSDLQQVGGASAR;VIGTLLGTVDK;VSADNTVGR;YAYYDTER
-2.77254	-1.91376	-2.58171	-2.52094	-2.28081	-2.38701	-0.313023	1.53157	4	4	98.911	O00308	WWP2	NEDD4-like E3 ubiquitin-protein ligase WWP2	AGVALPFEK;DLESIDPEFYNSIVWIK;LLYAIEETEGFGQE;LPVGGFAELIGSNGPQK
1.34899	1.35754	1.28168	1.28372	1.3637	1.3162	-0.0205065	0.240344	12	12	54.122	O00330	PDHX	Pyruvate dehydrogenase protein X component, mitochondrial	AAAVTLK;ANLENPIR;EHIPGTLR;GIQEIADSVK;GLLTPIIK;HSLDASQGTATGPR;ILMPSLSPTMEEGNIVK;IVVEEGSK;LTEDEEGNAK;QDLVKDDIK;VSVNDFIIK;VVDDELATR
1.77344	1.6305	1.70369	1.59972	1.65855	1.68842	0.071778	0.89293	10	10	34.88	O00338	SULT1C2	Sulfotransferase 1C2	ALTSDLGK;GWWEMKDR;HPFIEWARPPQPSGVEK;IVQETSFEK;KGTVGDWK;KVDETVLDK;KVDETVLDKIVQETSFEK;SILDQSISSFMR;VMQFMGK;VVWGSWFDHVK
-2.62581	-2.23901	-2.56022	-2.38292	-2.3175	-2.48098	-0.225786	1.76248	2	2	82.577	O00391	QSOX1	Sulfhydryl oxidase 1	AHFSPSNIILDFPAAGSAAR;ALAEDVK
-0.144806	-0.382313	-0.2928	-0.317553	-0.394702	-0.338324	0.0972595	0.753123	5	5	20.747	O00399	DCTN6	Dynactin subunit 6	GDVTIGPR;GSSTPVKN;ILPNYHHLK;MGDNNVIESK;VQTERPQPQTLQLDFLMK
0.00545502	-0.151083	-0.103932	-0.154182	-0.174281	-0.135862	0.0700563	0.649232	10	10	60.908	O00400	SLC33A1	Acetyl-coenzyme A transporter 1	EALLGDTGTGDFLK;EGDREALLGDTGTGDFLK;IGFSAADAVTGLK;KLQDEGSSSWK;LLWAPLVDAVYVK;LQDEGSSSWK;LVEEGVPK;RPGNFSHSLDMK;SGPLPPGGWDDSHLDSAGR;YTAGPQPLNTFYK
0.895378	0.984911	0.934655	0.927872	1.00222	0.947687	-0.0445258	0.826956	9	9	54.826	O00401	WASL	Actin nucleation-promoting factor WASL	AALLDQIR;ADIGTPSNFQHIGHVGWDPNTGFDLNNLDPELK;AVTDLLGR;DALLDQIR;FYGPQVNNISHTK;LLWEQELYNNFVYNSPR;SSVQQQPPPPR;SVADGQESTPPTPAPTSGIVGALMEVMQK;VIYDFIEK
2.84648	2.64883	2.75615	2.74533	2.68736	2.81076	0.0663369	0.652305	29	27	123.63	O00410	IPO5	Importin-5	AIGTEPDSDVLSEIMHSFAK;AKLEEHFK;ATAAFILANEHNVALFK;EFQQYLPVVMGPLMK;EGFVEYTEQVVK;EHIMQMLQNPDWK;FLFDSVSSQNVGLR;FMQDASDVMQLLLK;FYFHDGVR;HIVENAVQK;IFSIIAEGEMHEAIK;ITFLLQAIR;KQAEETYENIPGQSK;LLSSAFDEVYPALPSDVQTAIK;LMVPLLK;LQELIQK;LVLEQVVTSIASVADTAEEK;LVLPMIK;NLIDEDGNNQWPEGLK;QAEETYENIPGQSK;QMAAVLLR;RQDEDYDEQVEESLQDEDDNDVYILTK;SLLIPYLDNLVK;SLVEIADTVPK;TAGLEEK;VIAALLQTMEDQGNQR;VIQSADSK;VQAHAAAALINFTEDCPK;VS…
0.801661	0.887106	0.733075	0.809378	0.828078	0.781591	-0.0463587	0.859517	18	18	82.143	O00418	EEF2K	Eukaryotic elongation factor 2 kinase	ADEDLIFR;AFDSGQNLSPDR;ASAVALEVQR;DHDHLDNHR;EAEMLFTGGYGLEKDPQR;EHGHSYSNR;GASNYVAK;GFDYLLK;HMPDPWAEFHLEDIATER;LANQYYQK;LDHLHWPVFSDLDNMASR;LNALDLEK;LTPQAFSHFTFER;QVDIMQMCIIELK;VHLAMVR;YIEPVDRDVYFEDVR;YNAVTGEWLDDEVLIK;YNSNSGFVR
2.50778	2.11664	2.32284	2.27443	2.11576	2.29231	0.172033	1.02178	12	12	17.561	O00422	SAP18	Histone deacetylase complex subunit SAP18	EIGSTMSGR;ELTSLVK;EPEKPIDR;EVYPEAR;FQIGDYLDIAITPPNR;GNVPSSELQIYTWMDATLK;GTDDSMTLQSQK;KEPEKPIDR;KGTDDSMTLQSQK;VKEIGSTMSGR;VTQEEIK;VTQEEIKK
1.91972	1.73274	1.79523	1.73314	1.75832	1.78623	0.0765076	0.789904	24	23	89.86	O00423;Q6ZMW3;Q05BV3	EML1	Echinoderm microtubule-associated protein-like 1	ARPLMQTLPLR;DGTLVSGGGK;DQVDSYSLEAK;EPVFSAEEGYVK;ETAVPATK;GDVILIGTTR;GRPVTMYMPK;HATLWDAVGHRPVWDK;HYAGHNDDVK;IASLEQR;IIEDPAQSSGFHPSGSVVAVGTLTGR;ITIATGQVAGTSK;KLLSTGDDFGK;KPTGSLPSPSGVR;KTEIPEQFGPIR;LEWVYGYR;LISWSGNYQK;LLSTGDDFGK;QVVSVETTR;RLNITEEQQAVLNR;TEIPEQFGPIR;VELPTKR;VQMQEDDIQLLK;WFVFDTETK
3.54401	3.28063	3.4037	3.29336	3.3388	3.34315	0.128151	1.24946	31	25	63.704	O00425	IGF2BP3	Insulin-like growth factor 2 mRNA-binding protein 3	AEEEIMK;AEEEIMKK;AIEALSGK;ALQSGPPQSR;DQTPDENDQVVVK;EEVKLEAHIR;ENAGAAEK;FAGASIK;FTEEIPLK;IAPAEAPDAK;IELHGKPIEVEHSVPK;IEQDTDTK;IKEENFVSPK;ILAHNNFVGR;IPVSGPFLVK;IQEILTQVK;ITISPLQELTLYNPER;KENAGAAEK;KIEQDTDTK;KIQEILTQVK;LLVPTQFVGAIIGK;LNGFQLENFTLK;LYIGNLSENAAPSDLESIFK;LYIGNLSENAAPSDLESIFKDAK;MVIITGPPEAQFK;QGSPGSVSK;QKPCDLPLR;SILEIMHK;TVNELQNLSSAEVVVPR;VAYIPDEMAAQQNPLQQPR;VPSFAAGR
2.71593	2.51313	2.64066	2.57719	2.55372	2.58716	0.0894483	1.44197	34	34	81.876	O00429	DNM1L	Dynamin-1-like protein	AEELLAEEK;ALQGASQIIAEIR;AVMHFLVNHVK;DIELQIR;DTLQSELVGQLYK;EAADMLK;ELPSAVSR;EVDPDGRR;FISNPNSIILAVTAANTDMATSEALK;GHAVNLLDVPVPVAR;GVSPEPIHLK;IFSPNVVNLTLVDLPGMTK;INVLAAQYQSLLNSYGEPVDDK;KNIQDSVPK;KYPSLANR;LDLMDAGTDAMDVLMGR;LGIIGVVNR;LLMHHIR;LYTDFDEIRQEIENETER;MEALIPVINK;NIQDSVPK;NVASGGGGVGDGVQEPTTGNWR;RLEEPSLR;RPLILQLVHVSQEDK;RPLILQLVHVSQEDKR;SATLLQLITK;SSLLDDLLTESEDMAQR;SSVLESLVGR;SVTDSIRDEYAFLQK;TLA…
0.672441	0.609951	0.626653	0.63933	0.560967	0.616791	0.0326557	0.490102	11	11	39.336	O00442	RTCA	RNA 3-terminal phosphate cyclase	AFVAGVLPFK;DLYVNIQPVQEPK;DMAAAAVR;GGIHTADTK;GGTNAEMAPQIDYTVMVFKPIVEK;GVNADKVGIEAAEMLLANLR;KSEDEEDAAK;QLNPINLTER;STPGLRPQHLSGLEMIR;VEVDGSIMEGGGQILR;VGIEAAEMLLANLR
0.935806	0.858217	0.921283	0.893448	0.832614	0.882608	0.053854	1.27133	30	30	190.68	O00443	PIK3C2A	Phosphatidylinositol 4-phosphate 3-kinase C2 domain-containing subunit alpha	AVDQVIK;DALHDVQFSTR;DALQPQTTDAEATIFFTR;DLFKPIQSK;DLVTEDGADPNPYVK;DPWDAVLLEER;EGQIEPSFVFR;ELQLSVLSAESLR;ENFFLGGVTLPLK;EVSVFTYHK;FDWLDLDPLSKPK;FSGLPSNDEPILSFSPK;GMVELVPASDTLR;IASTSEFLK;ILASAPNWK;KYNPSEEEYEK;LIESSLGSIATK;LLDILHK;LPLKPSLVAK;LSIIFPLWK;LVQLLGGVAEK;SADAGSFSPTPGQIGGAVK;SIIQQHNLETLENDIK;STGHMFHIDFGK;TAEDDETPVDLNK;TFDEFQELHNK;TYLLPDNHK;VDNVEVLDHEEEKNVSSLLAK;VSLPLFDFK;YEHVLGALLSVGGK
-1.37579	-0.538134	-0.980855	-0.685795	-0.713092	-0.924553	-0.347262	1.10365	11	10	81.544	O00459	PIK3R2	Phosphatidylinositol 3-kinase regulatory subunit beta	ALGATFGPLLLR;DGAPEPGLTLPDLPEQFSPPDVAPPLLVK;EAAGPVGPALEPPTLPLHR;ERPEDLELLPGDVLVVSR;FLLQHLGR;IAEIHESR;IFEEQGQTQEK;ILLNSER;SFLLALPAPLVTPEASAEAR;TAIEAFNETIK;VYHQQYQDK
-0.174311	0.214222	0.0285025	0.111019	0.150338	0.0564976	-0.162718	1.1499	12	12	81.879	O00461	GOLIM4	Golgi integral membrane protein 4	AHQDIHTQLQDVK;AKEDFLVYK;DNQHQDEAEGDPGNRHEPR;EHQEALHQQR;FQSPYEEQLEQQR;KAEAVALK;LAVQQVEEAQQLR;LEAQETLNK;QAELEEGRPQHQEQLR;SALAAAQTQVAEYK;YLQLQQEKEQELSK;YSALNVQHQMLK
0.671959	0.601173	0.574203	0.611834	0.579833	0.618065	0.00438881	0.0436823	14	14	100.89	O00462	MANBA	Beta-mannosidase	DYVTLYVK;EFKIPFEISK;ELVLAGDK;FASEYGYQSWPSFSTLEK;GSNWIPADSFQDR;GSPGLSFYFK;ILFNEVTIGETDNMFNR;LLLQSVVDANMNTLR;LPQSTDPLR;QHHEGGNK;TILFYPWEPTSK;TVELIEEPIK;VNLILEGVDTVSK;VSSTEDWSFNSK
-3.95294	-2.32002	-3.46954	-2.54123	-2.62689	-3.18616	-0.837152	1.48372	2	2	64.405	O00463	TRAF5	TNF receptor-associated factor 5	DDTLFLK;GEFDSLLQWPFR
-0.659004	-0.475882	-0.707961	-0.563345	-0.617539	-0.695772	-0.0693893	0.749375	12	12	217.32	O00468	AGRN	Agrin;Agrin N-terminal 110 kDa subunit;Agrin C-terminal 110 kDa subunit;Agrin C-terminal 90 kDa fragment;Agrin C-terminal 22 kDa fragment	AIVDVHFDPTTAFR;APHPSHTSQPVAK;EPLYVGGAPDFSK;ESLLDGGNK;FDTGSGPAVLTSAVPVEPGQWHR;GIVTDGR;GLHTFAR;IFFVNPAPPYLWPAHK;QLLTPEHVLR;SAGDVDTLAFDGR;SIESTLDDLFR;VLGAPVPAFEGR
2.14561	1.9007	1.98827	1.95634	1.96026	2.01829	0.0711193	0.605414	24	24	84.685	O00469	PLOD2	Procollagen-lysine,2-oxoglutarate 5-dioxygenase 2	EFIAPVTLK;ESDGFHR;GFALLNFVVK;GGDGINSIGGGQK;IFQTLNGAVDEVVLK;IIAPLVTR;ILIEQNR;ILIEQNRK;ISGGYENVPTDDIHMK;IVGPEENLSQAEAR;IVQQWNLQDNDDDQLFYTK;KIIAPLVTR;LADKYPVVHIGK;LLVITVATK;LTHLHEGLPVK;QVDLENVWLHFIR;SEDYVDIVQGNR;VFAGYYTK;VLGQGEEWR;VVFAADGILWPDKR;VYIDPLK;VYIDPLKR;YIAVSFIDP;YLNSGGFIGYAPYVNR
1.74961	1.53829	1.6003	1.55257	1.54761	1.59299	0.0909017	0.853121	22	22	81.852	O00471	EXOC5	Exocyst complex component 5	ATTAELFEEPFVADEYIER;EAADIIQK;EVAAVLLHFK;GGPEAFDPK;HILAAEQK;IKEAADIIQK;KSDAEQYLK;KVQELQK;LHLIAQELPFDR;LIQNVFEIK;LLEEFVNHIQELQIMDER;LMEFNLGTDK;LSDPSDLPR;NILHSFVQLR;NVDTVLMELGVR;QFNDHLMPLISSSPK;QVGDIFSNPETVLAK;SDVFTNSEK;SIGTGGIQDLK;SNQVAFQHFQELDEHISYVATK;TNLPLGPSIDTHGETFLSQEVVVNLLQETK;YFNEFLDGELK
-2.18769	-2.23223	-2.24974	-2.19382	-2.21328	-2.27049	-0.0296701	0.250359	7	5	65.001	O00478	BTN3A3	Butyrophilin subfamily 3 member A3	EKLQEELK;EMGYAATEQEISLR;HYWEVEVGDR;HYWEVEVGDRK;MALFKPADVILDPDTANAILLVSEDQR;STGWYPQPQIK;VAALGSDLHIEVK
1.83337	1.34696	1.6398	1.41901	1.27128	1.36457	0.244802	0.712645	6	4	9.5388	O00479	HMGN4	High mobility group nucleosome-binding domain-containing protein 4	ADAGKDGNNPAK;AEGTGDAK;DASTLQSQK;DGNNPAK;VKDEPQR;VKDEPQRR
0.930716	0.109932	0.660251	0.398977	0.337483	0.557791	0.316306	1.31522	5	5	9.3697	O00483	NDUFA4	Cytochrome c oxidase subunit NDUFA4	FYSVNVDYSK;LALFNPDVCWDR;LGPNDQYK;NNPEPWNK;QIIGQAK
2.22505	2.11877	2.13755	2.16143	2.16027	2.22296	-0.0046285	0.0481319	13	13	34.577	O00487	PSMD14	26S proteasome non-ATPase regulatory subunit 14	AGVPMEVMGLMLGEFVDDYTVR;AVAVVVDPIQSVK;AVEEEDK;AVEEEDKMTPEQLAIK;EMLELAK;GKVVIDAFR;HNESVVK;KNELEQK;LINANMMVLGHEPR;MLLNLHK;QTTSNLGHLNKPSIQALIHGLNR;VIDVFAMPQSGTGVSVEAVDPVFQAK;VVIDAFR
2.64031	2.54324	2.63282	2.57092	2.60777	2.58383	0.0421619	1.5018	19	19	64.699	O00499;Q9UBW5;P49418	BIN1	Myc box-dependent-interacting protein 1	AGDVVLVIPFQNPEEQDEGWLMGVK;AMHEASK;AQPSDNAPAK;ESDWNQHK;ESDWNQHKELEK;GVFPENFTER;GVFPENFTERVP;HHYESLQTAK;IAENNDLLWMDYHQK;IASNVQK;KLVDYDSAR;LDLPPGFMFK;LNQNLNDVLVGLEK;LVDYDSAR;QHGSNTFTVK;QLTEGTR;TYLASVK;VNHEPEPAGGATPGATLPK;VQAQHDYTATDTDELQLK
1.77814	1.6514	1.68654	1.63624	1.68169	1.67387	0.0572968	0.832169	13	6	57.81	O00505	KPNA3	Importin subunit alpha-4	AENPSLENHR;AQNVTLEAILQNATSDNPVVQLSAVQAAR;DSQVVQVVLDGLK;EAAWAISNLTISGR;GDFGTQK;GRDVETMR;IEVLQQHENEDIYK;KLLSSDRNPPIDDLIK;LLSSDRNPPIDDLIK;NPPIDDLIK;RDEHLLK;SGILPILVK;VQTAALR
-1.86703	-1.56624	-1.73521	-1.646	-1.59678	-1.73975	-0.167233	1.25177	7	3	48.111	O00506	STK25	Serine/threonine-protein kinase 25	AANVLLSEQGDVK;ADIWSLGITAIELAK;GIDNHTK;GLDYLHSER;LADFGVAGQLTDTQIK;LADFGVAGQLTDTQIKR;VDPEELFTK
-0.341614	-0.341078	-0.422088	-0.376472	-0.363885	-0.383553	-0.0226294	0.326835	9	9	63.065	O00519	FAAH	Fatty-acid amide hydrolase 1	ELAPEAVLFTYVGK;GYFGDIWDK;LDPTVPPLPFREEVYTSSQPLR;LQNPDLDSEALLALPLPQLVQK;LSAFLSNMK;LSVGPMAR;LWELQHEIEVYR;QGLLYGVPVSLK;SPGGSSGGEGALIGSGGSPLGLGTDIGGSIR
-2.12108	-2.03259	-2.37242	-2.12651	-2.13725	-2.22219	-0.0813535	0.444177	4	4	84.347	O00522	KRIT1	Krev interaction trapped protein 1	EASLFIVPSVVK;GLHLLNMETK;LPLEVEK;SYEILLHEVPIEGQK
1.96163	1.68134	1.89996	1.74196	1.75904	1.832	0.127316	1.41869	21	21	86.488	O00534	VWA5A	von Willebrand factor A domain-containing protein 5A	AAITFLK;AHAGSTMPSVVK;AISQGHQAFLLEGDSSSR;ALHSDRPPSASQPR;ASGGTSEFITGK;DVPRPILLGASAPLK;ELNKPVQGPLAHR;ETLILLLK;ETPASDKK;FVLPAVLNPR;IVAELQDK;KIVAELQDK;LISYAQLTGR;LMQADLGGTEILAPLQNIYR;MLSPEQTVIFR;SSVDPAIFAF;TFEDKVTFPLQPKPDVNLTIHR;TPIVPVEDLPYTLSMVATIDSQHGIEK;VTFPLQPKPDVNLTIHR;YTQQTMEEALGR;YVQELPLEADGALR
1.48861	1.46007	1.38074	1.4333	1.43762	1.39776	-0.00471115	0.0429103	17	17	68.002	O00541	PES1	Pescadillo homolog	AHDEAVR;EALAFIIR;ELEAQEK;FLLHEPIVNK;GIYPHEPK;GSATNYITR;ITHQIVDRPGQQTSVIGR;KAHDEAVR;LAALEEQR;LAALSASLAR;LAQEEESEAK;LAQEEESEAKR;LEGQAQAEAK;LQLSLADFR;SFGGEVSWDK;VMAGTLK;VVVPATEEEAEVDEFPTDGEMSAQEEDR
-0.817041	-2.09349	-1.37252	-1.77225	-1.85229	-1.50489	0.541021	1.23652	2	2	282.56	O00555	CACNA1A	Voltage-dependent P/Q-type calcium channel subunit alpha-1A	ELNGYMEWISK;EVAEVSPLSAANMSIAVK
-2.38707	-2.55741	-2.48557	-2.62157	-2.50757	-2.43767	0.0426353	0.223319	2	2	24.377	O00559	EBAG9	Receptor-binding cancer antigen expressed on SiSo cells	EPLNFGIPDGSTGFSSR;QTDVEEWTSWDEDAPTSVK
1.2538	1.51794	1.23513	1.44771	1.44066	1.3315	-0.167492	1.92016	7	7	32.444	O00560	SDCBP	Syntenin-1	DSTGHVGFIFK;LYPELSQYMGLSLNEEEIR;SIDNGIFVQLVQANSPASLVGLR;SLMDHTIPEV;SLYPSLEDLK;SLYPSLEDLKVDK;VIQAQTAFSANPANPAILSEASAPIPHDGNLYPR
-1.54682	-1.40047	-1.42193	-1.42586	-1.36682	-1.50188	-0.018568	0.105816	8	8	134.85	O00562	PITPNM1	Membrane-associated phosphatidylinositol transfer protein 1	AALQVEEESWNAYPYTR;FMYGPLDVVTLTGEK;GPLSDDWAR;GSELATDPPAQPAAPSTTSEVVK;IEQFIHDVGLR;IHFPEALGHVALR;ILDTIDIVR;SQDHIPLAALPLLATSSSR
-1.18231	-1.1459	-1.22239	-1.14115	-1.20687	-1.17645	-0.0336666	0.66117	6	6	78.863	O00566	MPHOSPH10	U3 small nucleolar ribonucleoprotein protein MPP10	LSLAEIYEQEYIK;LTLDHEK;RPENSLLEETLHFDHAVR;VLYDFNK;VTFALPDDAETEDTGVLNVK;VVSNLPAITMEEVAPVSVSDAALLAPEEIKEK
2.99763	2.76206	2.86095	2.77846	2.79722	2.83538	0.100705	0.95077	29	29	66.049	O00567	NOP56	Nucleolar protein 56	AILDASR;AQLGLGHSYSR;EAMVQAEEAAAEITR;EELMSSDLEETAGSTSIPK;EEPVSSGPEEAVGK;EETVNDPEEAGHR;ELNEDKLEK;ELNEDKLEKLEELTMDGAK;EVEEISLLQPQVEESVLNLGK;EWYGYHFPELVK;IDCFSEVPTSVFGEK;KFSKEEPVSSGPEEAVGK;KNLDVMK;KVLLGVGDPK;LAQFIGNR;LEELTMDGAK;LHFHNLVK;LIAHAGSLTNLAK;LLLETHLPSK;LLLETHLPSKK;LSFYETGEIPR;MSQVAPSLSALIGEAVGAR;QSLHTYLR;SFSKEELMSSDLEETAGSTSIPK;STPKEETVNDPEEAGHR;VLLGVGDPK;VVSLSEYR;YGLIFHSTFIGR;YPASTVQILGAEK
3.30042	3.21271	3.21264	3.15351	3.23532	3.23837	0.028815	0.275578	37	36	73.243	O00571;O15523;Q9NQI0	DDX3X;DDX3Y	ATP-dependent RNA helicase DDX3X;ATP-dependent RNA helicase DDX3Y	DFLDEYIFLAVGR;DKDAYSSFGSR;DLLDLLVEAK;DREEALHQFR;DSLTLVFVETK;DSLTLVFVETKK;DSSGWSSSK;EIQMLAR;ELAVQIYEEAR;ELAVQIYEEARK;FSGGFGAR;GCHLLVATPGR;GFYDKDSSGWSSSK;GLDISNVK;HAIPIIK;HVINFDLPSDIEEYVHR;IVEQDTMPPK;KGADSLEDFLYHEGYACTSIHGDR;KQYPISLVLAPTR;LEQELFSGGNTGINFEK;LVDMMER;MLDMGFEPQIR;QEVPSWLENMAYEHHYK;QSSGASSSSFSSSR;QYPISLVLAPTR;SDYDGIGSR;SFLLDLLNATGK;SHVAVENALGLDQQFAGLDLNSSDNQSGGSTASK;SPILVATAVAAR;SSFFSDR…
-0.476664	-0.838274	-0.621484	-0.694698	-0.76982	-0.646076	0.137518	1.12066	4	4	29.48	O00584	RNASET2	Ribonuclease T2	DPPDYWTIHGLWPDK;ELDLNSVLLK;LGIKPSINYYQVADFK;VYGVIPK
0.207291	0.212631	0.162658	0.259428	0.0648355	0.184919	0.0214361	0.135234	6	6	58.635	O00592	PODXL	Podocalyxin	ATFNPAQDK;DKWDELK;EAGVSDMK;EITIHTK;LASVPGSQTVVVK;LKDKWDELK
0.869961	0.592083	0.743083	0.629496	0.61469	0.732904	0.117386	0.909347	14	14	32.113	O00625	PIR	Pirin	DGVTVAVISGEALGIK;EQSEGVGAR;GGRPGGFPDHPHR;HSQPIPK;IEPHHTAVLGEGDSVQVENK;IEPHHTAVLGEGDSVQVENKDPK;KVTLSVLSR;MNPGDLQWMTAGR;MVEPQYQELK;NLDPFLLFDEFK;SEEIPKPSK;SHFVLIAGEPLR;SIGRPELK;TPTLYLDFK
-0.341784	0.0180721	-0.250392	0.00278664	-0.107755	-0.325239	-0.166088	0.757581	12	5	57.886	O00629	KPNA4	Importin subunit alpha-3	ADNEKLDNQR;EAAWAISNLTISGR;GDFGTQK;GRDLETMR;IEQLQNHENEDIYK;KLLSSDRNPPIDDLIK;LLSSDRNPPIDDLIK;NPPIDDLIK;NVPHEDICEDSDIDGDYR;RDEHLLK;VQNTSLEAIVQNASSDNQGIQLSAVQAAR;VQTAALR
-0.435144	-0.356419	-0.43908	-0.412245	-0.366942	-0.435097	-0.0428785	0.881629	4	4	53.415	O00635	TRIM38	E3 ubiquitin-protein ligase TRIM38	APFHMDSLRPNK;CQGSAQK;LEKEEQQTLSR;SHILELEEK
1.24294	1.40888	1.27931	1.34138	1.41456	1.3384	-0.0909259	1.41711	11	11	35.144	O00743	PPP6C	Serine/threonine-protein phosphatase 6 catalytic subunit;Serine/threonine-protein phosphatase 6 catalytic subunit, N-terminally processed	AHQLVHEGYK;APLDLDKYVEIAR;AVPDSER;GAFCDLVWSDPEDVDTWAISPR;GAGWLFGAK;TGGQVPDTNYIFMGDFVDR;TTTPYFL;VTNEFVHINNLK;YGNANAWR;YLPENDLK;YLPENDLKR
-3.72458	-3.73186	-3.86575	-3.8429	-3.6713	-3.77829	-0.0593783	0.34965	1	1	61.806	O00748	CES2	Cocaine esterase	ADHGDELPFVFR
2.35333	2.08931	2.22359	2.17619	2.1329	2.20807	0.0944576	0.910654	21	21	113.74	O00754	MAN2B1	Lysosomal alpha-mannosidase;Lysosomal alpha-mannosidase A peptide;Lysosomal alpha-mannosidase B peptide;Lysosomal alpha-mannosidase C peptide;Lysosomal alpha-mannosidase D peptide;Lysosomal alpha-mannosidase E peptide	ASTSLKPPTADLFTGVLPNGYNPPR;DGSLELMVHR;DLFSTFTITR;ELVDYFLNVATAQGR;FDTPLETK;FLEDTFGNDGRPR;FQVIVYNPLGR;GVSEPLMENGSGAWVR;HLVLLDTAQAAAAGHR;KVNWMVR;LEHQFAVGEDSGR;LLKDDGR;LPVSEGVFVVK;LQETTLVANQLR;LVNAQQAK;QHVANDYAR;SPEYNAK;TQFSGLR;TVDQYFYGIK;VAWHIDPFGHSR;WAQIHLVK
1.02423	0.934559	0.999017	0.933041	0.953301	0.993488	0.0329183	0.541613	10	8	36.743	O00757	FBP2	Fructose-1,6-bisphosphatase isozyme 2	AGLAHLYGIAGSVNVTGDEVK;AISSAVR;IYSLNEGYAK;KFPEDGSAPYGAR;KKFPEDGSAPYGAR;KTSEDEPSEK;SPFETDMLTLTR;TLVYGGIFLYPANQK;YFDAATTEYVQK;YVGSMVADVHR
1.89928	1.83563	1.81258	1.83716	1.88137	1.84734	-0.0112387	0.134686	16	16	35.102	O00764	PDXK	Pyridoxal kinase	AQAGEGVRPSPMQLELR;DIEDPEIVVQATVL;EKVVPLADIITPNQFEAELLSGR;GQVLNSDELQELYEGLR;IHSQEEALR;KIHSQEEALR;LNNMNKYDYVLTGYTR;NPAGSVVMER;RDIEDPEIVVQATVL;RNPAGSVVMER;TVSTLHHVLQR;VLSIQSHVIR;VVPLADIITPNQFEAELLSGR;VVPLADIITPNQFEAELLSGRK;WDGEGSMYVPEDLLPVYK;YDYVLTGYTR
-2.04899	-2.09323	-2.10295	-2.12931	-2.10527	-2.04458	0.0111376	0.13597	2	2	41.522	O00767	SCD	Stearoyl-CoA desaturase	FSETHADPHNSR;GSTLDLSDLEAEK
-7.89807	-8.4212	-8.23977	-8.40106	-8.39899	-8.35507	0.201969	0.595802	1	1	32.156	O14494	PLPP1	Phospholipid phosphatase 1	AIGTFLFGAAASQSLTDIAK
-0.318604	-0.464331	-0.47668	-0.39332	-0.526023	-0.457405	0.0366192	0.221502	6	6	35.116	O14495	PLPP3	Phospholipid phosphatase 3	AIVPESK;EILSPVDIIDR;KEILSPVDIIDR;NNHHNMM;STIQNPYVAALYK;TTLSLPAPAIR
1.76133	1.85552	1.67102	1.76086	1.8286	1.70805	-0.0764885	0.679527	22	19	242.04	O14497	ARID1A	AT-rich interactive domain-containing protein 1A	AGPPVPASHIAPAPVQPPMIR;ALLALAK;DIGTPEAWR;DKPASENSEEK;EIGGLTQVNK;ELATNLNVGTSSSAASSLK;ELATNLNVGTSSSAASSLKK;EMAVVLLANLAQGDSLAAR;FPFGISPAQSHR;GEDPPPDIFAAADSK;HPGLLLILGK;KSSSSTTTNEK;LSIQDNNVDLILATPPFSR;LVLETLSK;LYELGGEPER;LYELGGEPERK;SLSFVPGNDFEMSK;SPFLHSGMK;SSTLTEDGAKSSEAIK;VDENHSEFTLYESR;VQEFDSGLLHWR;YLAFTEEK
-4.9747	-5.09952	-4.96043	-5.01544	-5.04012	-4.92544	0.0455653	0.495389	1	1	12.365	O14519	CDK2AP1	Cyclin-dependent kinase 2-associated protein 1	QLLSDYGPPSLGYTQGTGNSQVPQSK
0.185171	0.200733	0.168241	0.272449	0.125772	0.1628	-0.0176029	0.145662	2	2	17.043	O14521	SDHD	Succinate dehydrogenase [ubiquinone] cytochrome b small subunit, mitochondrial	AASLHWTSER;AVAMLWK
-1.80598	-1.75894	-1.79909	-1.74911	-1.77405	-1.83122	-0.0166416	0.273416	2	2	50.639	O14524	NEMP1	Nuclear envelope integral membrane protein 1	LLTEEEYR;WHDIWTR
-4.19755	-3.80156	-4.35651	-3.8954	-3.90654	-4.02923	-0.310021	2.00794	3	1	161.68	O14529	CUX2	Homeobox protein cut-like 2	AANVGSMFQYWK;GREPFIR;VVLAPEEK
-1.82023	-1.99948	-1.87801	-1.90025	-1.99567	-1.86436	0.0863902	0.888975	7	7	26.534	O14530	TXNDC9	Thioredoxin domain-containing protein 9	DFFQEVK;HLAILSK;LGSSDILNYSGNLMEPPFQNQK;LVEEHLDSEIQKLDQMDEDELER;MEADASVDMFSK;VIPTLALLK;VLEHQLLQTTK
1.18747	1.14317	1.10286	1.15603	1.14809	1.17289	-0.0122236	0.182258	13	13	61.877	O14531	DPYSL4	Dihydropyrimidinase-related protein 4	DLGALAQVHAENGDIVEEEQKR;GAADAIAQAK;GAPAVVISQGR;GLYDGPVHEVMVPAKPGSGAPAR;GVVVFGEPITASLGTDGSHYWSK;IFNFYPR;KTFPDFVYK;LAEIHGVPR;MDENEFVAVTSTNAAK;TFPDFVYK;TIDAHGLMVLPGGVDVHTR;VALEDGK;VAVGSDADLVIWNPK
-2.63072	-3.12337	-2.81045	-2.93612	-2.96679	-2.97728	0.192195	1.26528	2	2	64.84	O14545	TRAFD1	TRAF-type zinc finger domain-containing protein 1	AFESDVFHNR;VTPAAANYR
1.03518	0.643005	0.875886	0.767508	0.820733	0.816355	0.126346	1.0543	6	6	12.615	O14548	COX7A2L	Cytochrome c oxidase subunit 7A-related protein, mitochondrial	ADGVPVYLK;ADGVPVYLKR;FSGFTQK;GLPDQMLYR;LTSDSTVYDYAGK;NKVPELQK
-0.0198116	-0.782173	-0.235385	-0.629969	-0.427911	-0.425829	0.302533	1.26427	2	2	17.417	O14561	NDUFAB1	Acyl carrier protein, mitochondrial	LSVNSHFMK;LYDKIDPEK
1.28468	1.25536	1.22137	1.25234	1.21737	1.22032	0.0136204	0.227852	11	11	33.382	O14562	UBFD1	Ubiquitin domain-containing protein UBFD1	DAAQQDAK;FPLDSTGSELK;GKPEDVMPSVK;GLVPEDK;GSLQPAPAQPPGDPAAQASVSNGEDAGGGAGR;IHSITGLPPAMQK;IMVVGSTINDVLAVNTPK;LEQDQLWIGTK;LPMGSIK;LPTVPLSGMYNK;TEKLPMGSIK
-3.99711	-3.18729	-3.74753	-3.45882	-3.3707	-3.56907	-0.357886	1.58095	1	1	23.973	O14569	CYB561D2	Transmembrane reductase CYB561D2	ALSAETESHIYR
1.5572	1.15617	1.43315	1.27235	1.24726	1.35013	0.181061	1.56636	11	11	34.482	O14579	COPE	Coatomer subunit epsilon	APPAPGPASGGSGEVDELFDVK;DSIVAELDR;DSIVAELDREMSR;DVERDVFLYR;FGVVLDEIKPSSAPELQAVR;KFGVVLDEIKPSSAPELQAVR;LDRLDLAR;LQDAYYIFQEMADK;LSSPERDVER;LVLQYAPSA;MFADYLAHESR
-2.06658	-0.809143	-1.7094	-1.06353	-1.17111	-1.39312	-0.618542	1.79967	1	1	7.7469	O14610	GNGT2	Guanine nucleotide-binding protein G(I)/G(S)/G(O) subunit gamma-T2	MAQDLSEK
2.9248	2.82052	2.8623	2.85725	2.76291	2.82583	0.0646496	0.838866	31	31	130.16	O14617	AP3D1	AP-3 complex subunit delta-1	AEGTTYRDELLTK;ALDIDLDKPLADSEK;ALDLLYGMVSK;AVFHEEEQR;AVLIMYK;DVPVAEEVSALFAGELNPVAPK;EQAGEAEGAQAVTQLMVDR;FAVSQMSALLDSAHLLASSTQR;GMELSVLDSLNAR;GSLQEDSQVTVAIVLENR;GTLSFIAK;HRPSEADEEELAR;ILIEDSDQNLK;KGENSVSVDGK;KQEQANNPFYIK;LFGALTPLEPR;LLESGDLSMSSIK;LMTHVDK;LMTHVDKAEGTTYRDELLTK;LMTSSTNNWVLIK;LPQFVQSADLEVQER;LYASILQQK;MSFQNLLAK;NLMEIVK;NYLSLAPLFFK;SPEKDVPMVEK;SSPSPQK;VTTLPGHIQAVYVQNVVK;YLGLLAMSK;YPESLR…
1.18209	0.530231	0.945209	0.725407	0.672654	0.772484	0.291188	1.51385	12	12	29.04	O14618	CCS	Copper chaperone for superoxide dismutase	ESAQPPAHL;FLQLTPER;GDLGNVR;GGHPLSK;GMGSGQLQNLGAAVAILGGPGTVQGVVR;GRPIAGK;ITGNSGER;MEDEQLK;MEDEQLKVWDVIGR;SAGLFQNPK;SLIIDEGEDDLGR;VWDVIGR
1.96644	1.63636	1.79183	1.68314	1.70957	1.76599	0.132576	1.00016	21	21	87.687	O14639	ABLIM1	Actin-binding LIM protein 1	AIYDIERPDLITYEPFYTSGYDDK;AIYDIERPDLITYEPFYTSGYDDKQER;DYQGLFGVK;DYQTLPDGHMPAMR;EIFGMSIQEFDR;FPAAQAPDPSETPK;GVSMPNMLEPK;HFHVPDQGINIYR;HLAPEVFR;HSYTPTTSR;IETDHWPGPPSFAVVGPDMK;IFPYEMLMVTNR;LNSGLGQLILK;QHAALAAQSK;QLQEEQLMK;QSLGESPR;SSEDIIK;VDNEILDYKDLAAIPK;VLEAGDK;VLTGEYISK;YDSPINSASHIPSSK
-4.37488	-3.90297	-4.26322	-3.98707	-3.96224	-4.18539	-0.268973	1.58713	8	4	78.947	O14641	DVL2	Segment polarity protein dishevelled homolog DVL-2	AELAPPAPPLPPLPPER;AGSSTGGGGVGETK;FSSSTEQSSASR;GDGGIYIGSIMK;GGAVAADGR;GLSVHTDMASVTK;VIYHLDEEETPYLVK;YNFLGISIVGQSNER
-3.51958	-3.25132	-3.33028	-3.40808	-3.2017	-3.2392	-0.108606	0.530653	8	4	196.69	O14646	CHD1	Chromodomain-helicase-DNA-binding protein 1	GFSDAEIRR;GSVEEDILER;IIAHSNQK;LKNDDSLLYK;LLITGTPLQNSLK;LVISHEEELIPLHK;MVLDHLVIQR;VLIFSQMVR
0.816601	1.04224	0.801978	0.945902	1.06299	0.92712	-0.173976	1.81016	15	11	211.34	O14647	CHD2	Chromodomain-helicase-DNA-binding protein 2	AAHFDVEWGVEDDSR;AYSDQEHIK;DHHYGDRR;ENEVSTSATDELLSQFK;EYEWIHSQTK;GLNVQEQLEHTR;GSTSGFLNIVMELK;GTVEEEIIER;LKEEHGIELSSPR;LKNDDSLLYK;LLITGTPLQNSLK;MVLDHLVIQR;SIIQHEEEFEMLHK;SNSNPFNKEELTAILK;VLIFSQMVR
-0.405092	-0.0212898	-0.30502	-0.0772743	-0.091012	-0.224833	-0.199486	1.52438	4	4	24.775	O14653	GOSR2	Golgi SNAP receptor complex member 2	ILDIANMLGLSNTVMR;LRVDQLK;MDPLFQQTHK;YDVQHLQTALR
0.414921	0.204138	0.416305	0.337648	0.296292	0.377174	0.0687631	1.27339	6	6	37.808	O14656	TOR1A	Torsin-1A	AMFIFLSNAGAER;DLDDNLFGQHLAK;GYEIDEDIVSR;ITDVALDFWR;LKDIEHALSVSVFNNK;VAEEMTFFPK
-0.50108	-0.518583	-0.563436	-0.591532	-0.551871	-0.560425	0.0233809	0.396737	5	5	37.978	O14657	TOR1B	Torsin-1B	DLEPVLSVGVFNNK;GSAIDEDIVTR;LFGQHLATEVIFK;LYQDQLQK;VAEEMTFFPR
-0.369146	-0.262556	-0.322133	-0.362772	-0.274602	-0.337301	-0.00107447	0.009981	9	9	37.031	O14662	STX16	Syntaxin-16	AVQALPSR;DLGAMIVEQGTVLDR;ELASLHDK;HAQSGYLK;LTDAFLLLR;MKELASLHDK;QIVQSISDLNEIFR;SQHFFDTSVPLMDDGDDNTLYHR;WVDGVDEIQYDVGR
1.13585	1.11835	1.06229	1.04785	1.16168	1.12469	-0.0200316	0.189634	9	9	84.141	O14672	ADAM10	Disintegrin and metalloproteinase domain-containing protein 10	AIDTIYQTTDFSGIR;ATSGDKLNNNK;AVSHEDQFLR;EAVIAQISSHVK;ESYQMGHMR;FPNIGVEK;LVDADGPLAR;SLNTGIITVQNYGSHVPPK;TLPFHSVIYHEDDINYPHK
-0.578707	-0.881269	-0.726953	-0.82328	-0.841125	-0.73394	0.123166	0.97834	5	5	38.964	O14681	EI24	Etoposide-induced protein 2.4 homolog	ASSVLAQR;AYLFQLR;GIEMHQR;KQESEPR;TFLQDLAR
-1.55911	-1.56903	-1.66339	-1.69198	-1.64224	-1.62664	0.0469742	0.576773	4	4	21.054	O14683	TP53I11	Tumor protein p53-inducible protein 11	ILGVGGEDDDGEVHR;ISQVLGNEIK;KILGVGGEDDDGEVHR;QPPPLMK
0.858582	0.817694	0.752324	0.86825	0.807376	0.836983	-0.0278002	0.320017	4	4	17.102	O14684	PTGES	Prostaglandin E synthase	AFANPEDALR;KAFANPEDALR;SDPDVER;VAHTVAYLGK
-4.27357	-4.332	-4.40665	-4.33411	-4.34044	-4.42256	0.0300029	0.247137	3	3	21.782	O14713	ITGB1BP1	Integrin beta-1-binding protein 1	GLEGPLDLINYIDVAQQDGK;VLSTAFDSVLTSEKP;YVGAIEK
-1.41395	-1.25881	-1.44424	-1.32571	-1.27893	-1.4178	-0.0857251	0.96031	4	4	141.84	O14727	APAF1	Apoptotic protease-activating factor 1	ADLPEQAHSIIK;EDIKDYYTDLSILQK;LPLNIEEAKDR;YYLHDLQVDFLTEK
-4.74062	-4.85141	-4.74526	-4.79877	-4.86978	-4.84353	0.119833	1.6623	1	1	59.092	O14730	RIOK3	Serine/threonine-protein kinase RIO3	AASFLKDDGDPPLLYDE
-0.195919	-0.404453	-0.353507	-0.31455	-0.427402	-0.362074	0.0565777	0.350751	4	4	31.321	O14732	IMPA2	Inositol monophosphatase 2	ALVLTEIGPK;FIAEEAAASGAK;RDPATLK;VSGETDLSK
-1.31422	-1.5652	-1.46214	-1.53557	-1.56315	-1.50067	0.108792	0.860276	5	5	47.484	O14733	MAP2K7	Dual specificity mitogen-activated protein kinase kinase 7	AASSLEQK;DVKPSNILLDER;IDPPDPTKPDYDIR;LLEHSFIK;TGHVIAVK
-0.330105	-0.422647	-0.506722	-0.482565	-0.395753	-0.469496	0.0115388	0.0660878	7	7	35.914	O14734	ACOT8	Acyl-coenzyme A thioesterase 8	GYIGEGDMK;HYWVPAK;IAAQEVPIEIKPVNPSPLSQLQR;LFGGQIVGQALVAAAK;RYPLALNR;VKPQVSESK;VKPQVSESKL
0.461336	0.148153	0.271382	0.26045	0.186351	0.240322	0.105981	0.724844	5	5	23.539	O14735	CDIPT	CDP-diacylglycerol--inositol 3-phosphatidyltransferase	ALNQGTR;MGLWVTAPIALLK;MIDLSGNPVLR;NMAALDAADR;SLISVIHLITAAR
2.46949	1.84151	2.31024	2.02244	1.99021	2.17047	0.297459	1.71311	12	12	14.285	O14737	PDCD5	Programmed cell death protein 5	ADEELEALR;ADEELEALRR;AVENYLIQMAR;HGDPGDAAQQEAK;KVMDSDEDDDY;KVSQQTEK;LAELQAK;LSNLALVKPEK;NSILAQVLDQSAR;VSEQGLIEILK;VSEQGLIEILKK;YGQLSEK
2.9501	2.81676	2.86663	2.83362	2.81356	2.86147	0.0605265	0.939099	19	19	72.683	O14744	PRMT5	Protein arginine N-methyltransferase 5;Protein arginine N-methyltransferase 5, N-terminally processed	AAILPTSIFLTNK;AAILPTSIFLTNKK;AAMAVGGAGGSR;DLNCVPEIADTLGAVAK;DRDPEAQFEMPYVVR;DWNTLIVGK;EFIQEPAK;EKDRDPEAQFEMPYVVR;EWVAPEK;GFPVLSK;GPLVNASLR;KGFPVLSK;LSPWIRPDSK;SDLLLSGR;VPEEEKDTNVQVLMVLGAGR;VPLVAPEDLR;VPLVAPEDLRDDIIENAPTTHTEEYSGEEK;WLGEPIK;YSQYQQAIYK
4.83565	4.60089	4.72407	4.63633	4.66227	4.69929	0.0879898	0.908755	27	27	38.868	O14745	NHERF1	Na(+)/H(+) exchange regulatory cofactor NHE-RF1	AALNAVR;AGGDETK;AGLLAGDR;APQMDWSK;AQEAPGQAEPPAAAEVQGAGNENEPR;EADKSHPEQR;EALAEAALESPRPALVR;ETDEFFK;ETDEFFKK;ETHQQVVSR;GPNGYGFHLHGEK;GPSGYGFNLHSDK;IVEVNGVCMEGK;KGPSGYGFNLHSDK;KNELFSNL;LLVVDPETDEQLQK;LLVVDRETDEFFK;LLVVDRETDEFFKK;LVEPGSPAEK;LVEVNGENVEK;LVEVNGENVEKETHQQVVSR;QHGDVVSAIR;RAPQMDWSK;SADAAAGAPLPR;SKPGQFIR;SVDPDSPAEASGLR;VIPSQEHLNGPLPVPFTNGEIQK
-0.438503	-0.469128	-0.473634	-0.438593	-0.497653	-0.435656	-0.0112165	0.163571	7	7	68.009	O14772	FPGT	Fucose-1-phosphate guanylyltransferase	DPPEVSLR;ELPLGVQYHVFVDPAGAK;FLHKPSIEK;GEFWDIVAITAADEK;GTSLNVVVLNNSK;LPNASALGK;MLLAFYEK
2.53816	2.39914	2.40942	2.47132	2.37859	2.40781	0.0161457	0.0961994	7	7	61.247	O14773	TPP1	Tripeptidyl-peptidase 1	AYPDVAALSDGYWVVSNR;LFGGNFAHQASVAR;LSELVQAVSDPSSPQYGK;LYQQHGAGLFDVTR;VNTELMK;VVGQQGR;WLLAAGAQK
-3.68515	-3.87753	-3.88041	-3.72755	-3.76317	-3.86377	-0.05349	0.236328	1	1	43.566	O14775	GNB5	Guanine nucleotide-binding protein subunit beta-5	LHDVELHQVAER
3.13405	2.95106	2.99777	2.92022	3.00598	3.01963	0.0575682	0.435079	31	31	123.9	O14776;Q5VWI1	TCERG1	Transcription elongation regulator 1	AIVPLEAR;ALLSDMVR;ATFSEFAAK;AVDSSSMR;AVDSSSMREDLFK;DKYITAK;EALFNEFVAAAR;EEAIQNFK;EFEEYIRDK;ESAWTKPDGVK;GMEELKK;GPPPPPTASEPTR;GVSAFSTWEK;ILQNDKR;KLIQESDQHLK;KLIVAYVDDLDRR;KQVFDQYVK;LFNEHIEALTK;LIQESDQHLK;LIQESDQHLKDVEK;LIVAYVDDLDR;LIVAYVDDLDRR;LSMWDRPDDLIGR;NLDSEKEKELER;QLLDETSAITLTSTWK;SDFFELLSNHHLDSQSR;SSDVSWSDTRR;TLESTWEKPQELK;VFFYNPTTR;VYYYNAR;YLLLNPK
0.908117	0.870531	0.845235	0.873135	0.828849	0.843929	0.0158221	0.24578	20	13	101.39	O14787	TNPO2	Transportin-2	AHYQSFPPPVADFIK;ALVMLLEVR;ATIGILITTIASK;DDLRDMFYK;DNEEKDSAFR;DQVGEDNWQQFSEQFPPLLK;DSQSPNTATQR;EELLPHLLPLLK;GDVEEDEAVPDSEQDIKPR;GLLFHPEWVVK;ILDGNKR;LAAFYGV;LKSEDEPTR;LMPPLIQK;NIRDNEEKDSAFR;QSSFALLGDLTK;SLSGLILK;TVTLPHEAERPDGSEDAEDDDDDDALSDWNLR;TVTLPHEAERPDGSEDAEDDDDDDALSDWNLRK;YSEIDIILLK
-2.1067	-2.32822	-2.3781	-2.29594	-2.34494	-2.35396	0.0423336	0.17213	13	10	180.68	O14795;Q8NB66	UNC13B	Protein unc-13 homolog B	AAHVQQMK;ELDLEAADSLK;ELSHLSK;ESDDFLGQTIIEVR;FELPFDIPEEEAR;KIHMDETGLTILR;LLDQLHNSLR;SPDLQSLR;TIFGNLNPVWEEK;VLGLAVMPLR;VLMQYADILSK;WEQINALGADNEYSSQEESQR;WLHNEYVR
-0.31468	-0.233875	-0.267842	-0.280245	-0.273025	-0.232256	-0.0262788	0.573487	14	14	155.64	O14802	POLR3A	DNA-directed RNA polymerase III subunit RPC1	AISTPIITAQLDKDDDADYAR;AVIHIDEQSGK;GFSIGIGDVTPGQGLLK;HLIDGDVVLFNR;IDEVAVPVHVAK;IKEIINASK;ILTFPEK;ITPTQVEK;KQFLDYLK;LLVEGDNLR;QIFSVILRPSDDNPVR;RPLIFDTNEFHIPLVT;SLPHFEK;VVVQGIPEVSR
-1.20826	-0.991211	-1.17787	-0.95591	-0.988198	-1.1276	-0.178642	1.52118	10	10	23.846	O14807	MRAS	Ras-related protein M-Ras	AFHDLVR;ASFEHVDR;ATSAVPSDNLPTYK;ESFPMILVANK;FHQLILR;IFVPDYDPTIEDSYLK;LVVVGDGGVGK;SALTIQFFQK;TGDGFLIVYSVTDK;VDLMHLR
2.77354	2.69592	2.73399	2.76614	2.69392	2.78307	0.00773366	0.0930009	15	15	27.887	O14818;Q8TAA3	PSMA7	Proteasome subunit alpha type-7	AITVFSPDGHLFQVEYAQEAVK;AITVFSPDGHLFQVEYAQEAVKK;ALLEVVQSGGK;DIVVLGVEK;EKEENEK;GRDIVVLGVEK;GSTAVGVR;ILNPEEIEK;KGSTAVGVR;LTVEDPVTVEYITR;LYQTDPSGTYHAWK;NIELAVMR;NYTDEAIETDDLTIK;RPFGISALIVGFDFDGTPR;YVAEIEKEKEENEK
-1.70318	-1.58427	-1.57237	-1.56738	-1.53129	-1.60191	-0.0693073	0.740277	8	8	140.76	O14827	RASGRF2	Ras-specific guanine nucleotide-releasing factor 2	ALSQDDQDDIHLK;AVLESAPADR;GLSSPEQSPGTVEENVDNPR;HAQDFELNNELK;IVVEPPDAAAFTVVLLAPSR;LKSEIIALNK;VMHDEVSDTENIRK;YIHLVQIVETEK
1.05276	0.669909	0.868951	0.799166	0.73058	0.815065	0.149246	1.05878	13	13	38.287	O14828	SCAMP3	Secretory carrier-associated membrane protein 3	AEELDRR;AQQEFAAGVFSNPAVR;DGGNPFAEPSELDNPFQDPAVIQHRPSR;ELQHAALGGTATR;EPPPAYEPPAPAPLPPPSAPSLQPSR;KAEELDRR;KLSPTEPK;KQEELNR;LSPTEPK;NYGSYSTQASAAAATAELLK;QYATLDVYNPFETR;TAAANAAAGAAENAFR;TGASFQK
1.49885	1.50313	1.46559	1.48138	1.51332	1.53551	-0.0304527	0.752488	13	13	38.538	O14832	PHYH	Phytanoyl-CoA dioxygenase, peroxisomal	EVVGIAHK;FFGAENSVNLK;GDTVFFHPLLIHGSGQNK;GSLKPHDYPK;GTSQENIEK;GTSQENIEKEVVGIAHK;KFYEENGFLVIK;MFHGIQDYEENK;MFHGIQDYEENKAR;NLVPDADIQR;SEYAPSEK;VHLVMEK;VQDFQEDKELFR
3.30459	3.37347	3.28497	3.37172	3.29917	3.3225	-0.0491676	0.896785	39	39	137.46	O14841	OPLAH	5-oxoprolinase	AFRPYGLHGGEPGAR;AGDFGAAFVER;ALGMDTVHIHR;AQTGPPR;AQVAANQK;DLLHIGTQAR;DQPLDSSHIASIR;DVQVLFMR;EEALLSVLTER;EFGFVIPERPVVVDDVR;ELGFTHVSLSSEAMPMVR;ELLFREEALLSVLTER;FHFAIDR;FMSIAEQMGR;GEAGTGTPVK;GFQGQLK;GGDGVTR;GGPVTVTDANLVLGR;GHTACADAYLTPAIQR;GKLEGLLSR;GLNLLIR;GLPLEVSSEDHMDDGSPIR;GSILDPSPEAAVVGGNVLTSQR;ILEQEAGMLLPR;ITDPEILESR;KGGPVTVTDANLVLGR;LLPASFPCIFGPGENQPLSPEASR;LLSEDPANYADAPTEGIR;LLSEDPANYADAPTEGI…
1.02585	0.850975	0.955813	0.8939	0.908515	0.946806	0.058417	0.901508	8	8	46.36	O14874	BCKDK	Branched-chain alpha-ketoacid dehydrogenase kinase	GGGIAHK;KHIEDEK;LTPTMMLYAGR;QLLDDHKDVVTLLAEGLR;SQDGSHLLK;TVTSFYNQSAIDAAAEKPSVR;VMDYHFTTAEASTQDPR;YLQQELPVR
-0.669521	-0.676327	-0.799541	-0.662422	-0.584828	-0.76545	-0.0267836	0.132931	7	7	55.984	O14879	IFIT3	Interferon-induced protein with tetratricopeptide repeats 3	AIELFQR;ATMYNLLAYIK;EAEGEQFVEEALEK;ELLSNSEQLN;LSDAQIYVDK;QAEELIQQEHADQAEIR;QAIELSPDNQYVK
2.00353	1.3287	1.76217	1.54275	1.47849	1.66612	0.285208	1.39251	4	4	16.516	O14880	MGST3	Glutathione S-transferase 3, mitochondrial	IASGLGLAWIVGR;SGLGSGPK;VLYAYGYYTGEPSK;VLYAYGYYTGEPSKR
-2.84514	-2.67328	-2.59007	-2.6866	-2.56343	-2.53007	-0.0895475	0.402241	3	3	31.585	O14893	GEMIN2	Gem-associated protein 2	MRRAELAGLK;SEDEEGWKK;SQQLDSNVTMPK
-0.139664	-0.411127	-0.232244	-0.351738	-0.372682	-0.270979	0.132463	1.43084	4	4	13.735	O14907	TAX1BP3	Tax1-binding protein 3	IMQVNGWDMTMVTHDQAR;RSEEVVR;SYIPGQPVTAVVQR;VSEGGPAEIAGLQIGDK
1.13284	0.844957	0.940509	0.852503	0.866673	0.900854	0.138421	1.03987	12	12	36.049	O14908;Q8TF64	GIPC1	PDZ domain-containing protein GIPC1	AIEKVDDLLESYMGIR;APPLVENEEAEPGR;DTELAATMVELGK;GGLGVGEPGPLGGGGSGGPQMGLPPPPPALRPR;GPATVEDLPSAFEEK;IEGFTNVK;KAFDMISQR;KAPPLVENEEAEPGR;LVFHTQLAHGSPTGR;NPDELAEALDER;SAGGRPGSGPQLGTGR;VDDLLESYMGIR
-1.20462	-1.3785	-1.37468	-1.37141	-1.3955	-1.39096	0.0683454	0.52797	9	3	25.996	O14910	LIN7A	Protein lin-7 homolog A	AIELLEK;ATVAAFAASEGHSHPR;EQNSPIYISR;GDQLLSVNGVSVEGEHHEK;IIPGGVAER;LQESGEVPVHK;RGDQLLSVNGVSVEGEHHEK;TDEGLGFNVMGGK;VLEEMEAR
0.333275	0.147398	0.233512	0.169456	0.1923	0.253551	0.0680714	0.794992	12	11	86.563	O14920	IKBKB	Inhibitor of nuclear factor kappa-B kinase subunit beta	ALDDILNLK;ALELLPK;DLKPENIVLQQGEQR;ELWNLLK;FSSSLPYPNNLNSVLAER;GPVSGSPDSMNASR;IIDLGYAK;KQGGTLDDLEEQAR;LLLQAIQSFEK;VEEVVSLMNEDEK;VIYTQLSK;WHNQETGEQIAIK
0.360945	0.410276	0.386161	0.39192	0.412238	0.409956	-0.0290794	1.36791	6	6	21.943	O14925;Q5SRD1	TIMM23	Mitochondrial import inner membrane translocase subunit Tim23	ETQNMAWSKPR;GAEDDLNTVAAGTMTGMLYK;GSLLQQSL;MEGGGGSGNK;NVQILNMVTR;YLVQDTDEFILPTGANK
-1.34634	-1.61557	-1.51836	-1.58169	-1.60454	-1.56233	0.129686	1.10453	6	6	49.54	O14929	HAT1	Histone acetyltransferase type B catalytic subunit	LLVTDMSDAEQYR;LRDFVLVK;RVYEILR;TFFPEYTHQLFGDDETAFGYK;VSQMLILTPFQGQGHGAQLLETVHR;YYTEFPTVLDITAEDPSK
-0.324301	-1.04082	-0.435498	-0.72562	-0.747348	-0.569548	0.280676	1.84546	4	4	17.769	O14933	UBE2L6	Ubiquitin/ISG15-conjugating enzyme E2 L6	ELEDLQK;MDLADLLTQNPELFR;NAEEFTLR;NLSSDDANVLVWHALLLPDQPPYHLK
1.984	1.84558	1.83371	1.86732	1.80711	1.84239	0.045571	0.360317	26	26	105.12	O14936	CASK	Peripheral plasma membrane protein CASK	ADAGFVYSEAVASHYMR;AQFEYDPAKDDLIPCK;DDHNWWQGK;EINGISVANQTVEQLQK;ENSAPVK;ETGQQFAVK;FTSSPGLSTEDLKR;GAVLAAVSSHK;HNAVFDQLDLVTYEEVVK;IHEQGLIAILDVEPQALK;IHLPETVEQLR;IHLPETVEQLRK;IMHGGMIHR;ITVYEALNHPWLK;KIHEQGLIAILDVEPQALK;LFEGIIK;NPPSDAVQR;NTDEPMGITLK;QGTLHVGDEIR;QILEALR;QWSHISESAK;RADAGFVYSEAVASHYMR;TAEFAPFVVFIAAPTITPGLNEDESLQR;TLVLLGAHGVGR;VGDIIQIISK;VGTPHFMAPEVVK
-6.49149	-6.19835	-6.56575	-6.34876	-6.21763	-6.39595	-0.228891	1.6958	4	3	105.99	O14939	PLD2	Phospholipase D2	EMPSLPR;EYVAVEPLATVSPPLAR;FLEDESLLPPLGSK;VHPLVFAPGVPVTAQVVGTER
2.30456	2.03803	2.14092	2.06499	2.08061	2.16574	0.0921885	0.66701	8	8	9.9062	O14949	UQCRQ	Cytochrome b-c1 complex subunit 8	AYPHVFTK;EFGNLTR;GIPNVLR;GREFGNLTR;HVISYSLSPFEQR;KNPAAYENDK;NPAAYENDK;RKNPAAYENDK
3.04956	2.81162	2.87336	2.78869	2.95806	2.87903	0.0700912	0.41142	12	4	19.779	O14950;P19105	MYL12B;MYL12A	Myosin regulatory light chain 12B;Myosin regulatory light chain 12A	ATSNVFAMFDQSQIQEFK;DGFIDKEDLHDMLASLGK;EAFNMIDQNR;EAPIDKK;EDLHDMLASLGK;ELLTTMGDR;ELLTTMGDRFTDEEVDELYR;FTDEEVDELYR;GNFNYIEFTR;HGAKDKDD;KGNFNYIEFTR;LNGTDPEDVIR
3.2665	2.89087	3.11223	2.98239	2.95576	3.06123	0.163712	1.27044	27	27	86.191	O14964	HGS	Hepatocyte growth factor-regulated tyrosine kinase substrate	AAEEAER;AEPMPSASSAPPASSLYSSPVNSSAPLAEDIDPELAR;ALQNAVTTFVNR;APDWVDAEECHR;ATSTTELPPEYLTSPLSQQSQLPPK;ATSTTELPPEYLTSPLSQQSQLPPKR;ESDAMFAAER;GALSALR;GALSALREEHR;GSGTFER;KQEYLEVQR;LQEQEKER;LYYEGLQDK;QEYLEVQR;QGDTQAK;QIQLAQK;QTMEELKDLLK;QTMEELKDLLKR;QVEVNVR;RAAEEAER;RDETALQEEEELQLALALSQSEAEEKER;RLYYEGLQDK;STYTSYPK;VEGHVFPEFK;VVQDTYQIMK;YAVNSIK;YKVVQDTYQIMK
0.65592	0.214828	0.516131	0.393549	0.306361	0.469364	0.167131	1.14707	7	6	23.155	O14966	RAB29	Ras-related protein Rab-7L1	LQLWDIAGQER;NINEAMR;NSTEDIMSLSTQGDYINLQTK;VLQWSDYEIVR;VLVVGDAAVGK;WKQDLDSK;YSQDSFSK
2.19725	2.03629	2.10291	2.02567	1.94358	2.09784	0.108388	0.908409	18	18	70.038	O14967	CLGN	Calmegin	AALEKPMDLEEEK;AKKDDMDEEISIYDGR;EADESTGSGDGPIK;EIEDPNDKKPEEWDER;EVADHWAADGWR;GSLLEDVVPPIKPPK;GVLEQEEKEEK;GVWRPPLVDNPNYQGIWSPR;HKDTEYK;IMIANANKPGVLK;KPEEWDER;LAGWVLSK;LLADTDDLILENFYDK;TGVFEEK;TPQPIGEVYFAETFDSGR;TSYIIMFGPDK;WEIEELKENQVPGDR;YKTPQPIGEVYFAETFDSGR
-0.0211735	-0.363968	-0.193206	-0.225929	-0.325944	-0.207951	0.129762	0.95072	8	7	33.01	O14972	VPS26C	Vacuolar protein sorting-associated protein 26C	FTPSPVDFTITPETLQNVK;GKFTPSPVDFTITPETLQNVK;GLSVPIYMVFPR;GTALDIK;SVELQLVR;TEIPFEFPLHLK;VYHAGEVLSGVVVISSK
3.32982	3.10327	3.23965	3.14148	3.13969	3.16717	0.126249	1.91889	46	46	115.28	O14974	PPP1R12A	Protein phosphatase 1 regulatory subunit 12A	AQLHDTNMELTDLK;DDSTDFKK;DTAGVTR;DYDGWTPLHAAAHWGK;EEEKEGEDKSQPK;EKDTAGVTR;ESETSREDEYK;ETLIIEPEK;ETQTDSISR;FPTTATK;GYTEVLK;ISEMEEELK;ITTGSSSAGTQSSTSNR;KDESPATWR;KESETSREDEYK;KFPTTATK;KLYEQILAENEK;KQNLLHSEK;KTGSYGALAEITASK;LASTSDIEEKENR;LAYVAPTIPR;LEKDDSTDFK;LSSSLDNK;LSSSLDNKEK;LWAEDSTEKEK;LYEQILAENEK;NKETLIIEPEK;QGVDIEAAR;QNLLHSEK;QWLNSGHINDVR;RISEMEEELK;RLASTSDIEEKENR;SGGTALHVAAAK;SGSYSYLEER;SLLEM…
-0.0998173	-0.128473	-0.165704	-0.158779	-0.156928	-0.155024	0.011488	0.19253	11	11	70.311	O14975	SLC27A2	Long-chain fatty acid transport protein 2	AAMITHQR;ALHDHLGLR;DALYFLDDTAK;DETLTYAQVDR;IGMASIK;IITYDLIK;IQDTIEITGTFK;KDDVSIYYVSR;KIITYDLIK;MTLVEEGFNPAVIK;QTPHKPFLLFR
1.62321	1.66292	1.61385	1.61618	1.65914	1.5958	-0.00734838	0.143613	29	29	143.19	O14976	GAK	Cyclin-G-associated kinase	AAGQPYEQHAK;ALLSTLHTVLWDGESR;ALVEEEITR;AMLQVNPEER;APSFAQKPK;AVLAVHPDK;AVQHMHR;AVVMTPVPLFSK;DFKIEDGK;DLKVENLLLSNQGTIK;DQSDFVGQTVELGELR;EAPPWENSSMR;EEQQDILSK;FLHTLDWQEEKEAETGAENASSK;GDLDISYITSR;GQLVEFLK;IAVMSFPAEGVESALK;LLDWIEGK;LLSNEEEKNR;LSIAEVVHQLQEIAAAR;NMHAWLR;QHPFEDGAK;TPEIIDLYSNFPIGEK;VASTSQEYDK;VENLLLSNQGTIK;VIQSVANYAK;VLAEGGFAFVYEAQDVGSGR;VSENDFEDLLSNQGFSSR;WTPVGMADLVAPEQVK
2.56379	2.14565	2.40289	2.24693	2.28904	2.37569	0.154389	1.11733	19	18	46.437	O14979;Q9ULL8;REV__Q8N0S2;REV__Q9ULL8	HNRNPDL	Heterogeneous nuclear ribonucleoprotein D-like	DAASVDK;DLTEYLSR;EHKLDGK;EYFGAFGEIENIELPMDTK;GFCFITYTDEEPVKK;GFGFVLFK;HVTAQQPSR;KDLTEYLSR;KVFVGGLSPDTSEEQIK;LAGGAAIK;LSHVPPPLFPSAPATLASR;MFIGGLSWDTSK;MFIGGLSWDTSKK;NQQDDGK;QLAPLLPSLAPSSAR;QQQQQQK;TDPVTGR;VFVGGLSPDTSEEQIK;YHQIGSGK
3.23249	2.88743	3.05435	2.93902	2.90426	3.00255	0.171476	1.26933	35	35	123.38	O14980	XPO1	Exportin-1	AIIASNIMYIVGQYPR;AVGHPFVIQLGR;DFEEYPEHR;DFLVQIK;DTDSINLYK;EFAGEDTSDLFLEER;EFMKDTDSINLYK;EHDQLIEK;EHLRDFLVQIK;EHPDAWTR;EPEVLSTMAIIVNK;ESPFSTSASPLLSGSQHFDVPPR;ESPFSTSASPLLSGSQHFDVPPRR;ETLVYLTHLDYVDTER;FLVTVIK;HWPTFISDIVGASR;IYLDMLNVYK;LHNQVNGTEWSWK;LISGWVSR;LISTLIYK;LLSEEVFDFSSGQITQVK;LNMILVQILK;MAKPEEVLVVENDQGEVVR;MAQEVLTHLK;NVDILKDPETVK;QLGSILK;QLLDFSQK;QLYLPMLFK;QMLPLNTNIR;SAFPHLQDAQVK;SNDPQMVAE…
-2.11232	-1.72293	-1.92356	-1.55002	-1.87306	-1.89533	-0.245702	0.924539	11	11	206.89	O14981	BTAF1	TATA-binding protein-associated factor 172	DAVETNEK;EQEAGVLAMDALHR;EVLQEYIAGADTIMEDPATR;EYLNPLHYTGPPTER;GAEFALTTIVK;IIEGLQDLDDDVR;IPVPINAELR;LPHLWDAMVGPLR;QPTLQAAELIDSEFR;QVLPFLLR;VLPWLGAIDDSVK
-0.585985	-0.520542	-0.616925	-0.50161	-0.590613	-0.569517	-0.0532424	0.857352	13	13	151.61	O15013	ARHGEF10	Rho guanine nucleotide exchange factor 10	APDGSWDSEPQK;FIVLATALHEK;GHPDRLPLQMALTELETLAEK;GNYQNLNQSVAHDWTSGLQR;HLQDINIATPVHNMLPGHQR;ILEQYEKPLSEMEPK;IQLQLPGK;LFHTETLK;LGVLPVR;LQHFFTPEK;QPHQEELAPTVMVWQIPLLNI;SEDSTIYDLLKDPVSLR;SLIAQDHR
4.97561	4.82711	4.85825	4.81923	4.79438	4.83074	0.0761	0.798002	122	109	271.32	O15020	SPTBN2	Spectrin beta chain, non-erythrocytic 2	AAELQAQWER;AASAGVPYHGEVPVSLAR;AKDELSAQAEVK;AKDELSAQAEVKK;ALADEREAVQK;ALAQEDQGAGEVER;ALAVEGK;ALAVEGKR;ALGAAAAGPELAELQEMWK;ALGEEVTR;AMTMPPVSPVGAEGPVVLR;AQGSVAFDYR;AQSEYSR;ATVAEWK;AVSASALR;AYAGDKAEEIGR;DEAEMSSWLR;DELSAQAEVK;DGLAFNAIVHK;DLEAIAAR;DLNAAEALQR;DLPSVQLLMK;DLTGALR;DLTSVNILLK;DTSTIGQER;DVEDEILWVTER;DVSSADLVIK;DWLDKVDK;EANALAAGHPAQAVAINAR;EESLGEAR;EIQGHEPR;EKEVEAIQAQAK;ELDDLEQWIQER;ELTLEKPEL…
0.657303	0.618582	0.650361	0.639645	0.627152	0.638775	0.00951195	0.39481	16	16	251.89	O15027	SEC16A	Protein transport protein Sec16A	ADSGPTQPPLSLSPAPETK;AFPGPLAK;ASHSSERPPPR;DALESAMK;DDTHKVDVINFAQNK;EHSAFGDRPEK;EKPEEESLAAPTWLVHLQQVER;FGPGGQLIK;LFDPQLK;LVLIGSNHSLPFLK;QGYPEGYYSSK;SIVWDEKK;SPDPGIVPQEAPVGNSLSELSEENFDGK;SVHSEHSAR;VDVINFAQNK;YPEPERPSSR
2.99788	2.91601	2.90699	2.8986	2.90862	2.90472	0.0348969	0.515924	37	36	205.12	O15031	PLXNB2	Plexin-B2	AANPDYR;AEEASHWLWSR;AHTDSLNTLVALHQLYQYTQK;AITEIYLTR;AMTLQEAEAFVGAER;DGATLILSK;DGDKDVMITGK;DLVLSGDLGSLYAMTQDK;DSAGEPLYK;DTTHNLPEFIVK;EAFEAYTDHATYK;EASPNPEDGIVR;FWVNILK;GNGPHDNGIIVSTR;GPVDAVQK;GSSLHVGSDLLK;HALLEEENR;HNIQDEDTIHIWK;IIDQVYR;IQPETGPLGGGIR;LFYEDGSGEK;LQLEQQVATGPALDNKK;LQQIAAALENK;MVEDYYK;QMVQVSDQDMNTHLAEISR;RPVVEQALYQFSNLLNSK;RSETVVER;SFVASNDEGVATVGLVSSTGPGGDR;SQLEGLEESVR;SQLEGLEESVRDR;…
-3.02508	-2.97913	-3.0967	-2.98614	-3.02912	-3.05968	-0.0590242	0.716934	5	5	153.85	O15040	TECPR2	Tectonin beta-propeller repeat-containing protein 2	DAFAGGVKPFELHPR;ISSRPEGLTSTVR;LDLSQLGAVK;RFDVTGIHK;SLLFYTEEK
1.91892	1.67245	1.82802	1.74765	1.74484	1.81254	0.0862064	1.0331	26	26	118.29	O15042	U2SURP	U2 snRNP-associated SURP motif-containing protein	ADKTPGGSQK;AWEDWAIYPEPFLIK;EEHETDEKR;EINNPMFR;FGPLASVK;FLFENQTPAHVYYR;FQDELESGK;GALKEEQR;GGVVNAAKEEHETDEK;KNEPIFK;KPGQSFQEQVEHYR;KPGQSFQEQVEHYRDK;LYLVSDVLYNSSAK;LYSILQGDSPTK;NLLALIHR;NPPNQSSNERPPSLLVIETK;QIQEERDER;SLDDDLDGVPLDATEDSK;SLDDDLDGVPLDATEDSKK;SNLELFKEELK;TIQGHLQSENFK;TLSQAIVK;VANASYYR;VAPSKWEAVDESELEAQAVTTSK;WEAVDESELEAQAVTTSK;YSEMSEEKR
-3.89539	-3.55551	-3.87204	-3.67467	-3.62921	-3.7125	-0.165767	1.47278	3	3	186.03	O15047	SETD1A	Histone-lysine N-methyltransferase SETD1A	EVPVPTPAPVEVPVPER;KYGEVEEVEILLHPR;LIVDPALDPALR
0.226702	0.319586	0.217288	0.276594	0.285277	0.277681	-0.0606238	3.66538	18	18	165.54	O15056	SYNJ2	Synaptojanin-2	AAERPSHR;DFHEGAINFGPTYK;DLEASSEPEPTPGAAKPETPQAPPLLPR;EQYGQQVVVNLLGSR;GENVSPR;GGASEEALSAVAPR;GGMLLDSTALLVTPR;GLEANAPAFDR;GLREEIIR;GSVPLFWEQPGLQVGSHHLR;ITATDFYPLQEEAKEEER;LHWEDFDVFTK;LLEFDQLQLQK;LLLVGDVYGEEVADK;LLPGAPQQPPK;MWGEQLQK;TAGELNLLDSDLDVDTK;TIQSNFFDGVK
5.02946	4.65855	4.93163	4.7456	4.74755	4.78821	0.192215	1.98932	96	95	172.87	O15061	SYNM	Synemin	AALEALLGR;AASLTMHFR;AELQELNAR;ALLEGESNPEIVIWAEHVENMPSEFR;APLASFNHSSALYSNLSGHR;ASAGEGDQAHR;ASAGEGDQAHREQGK;ATGPAAPPPR;ATLTLAMADWLR;AVESVVR;AVSSQTNVR;DADSRNDQAVGVSFK;DGAVGEK;DKVAAGASESTR;DYQDLLQVK;EALGLEQLR;EEEGYGESDVTFSVNQHR;EELSALTR;EEYGIQAEER;EGLWAEGQAR;EGQGGPGSVSVDVK;EGQGGPGSVSVDVKK;EIIFQGPISAAGK;ELEEALR;ELEEALRR;ELERENLLLEEELR;ELQEALGAR;ELYIPSGESEVAGGASHSSGQR;ENLLLEEELR;EQAMFDKK;EQGKEQAMFDK;ER…
-0.837502	-1.31066	-1.10087	-1.18294	-1.34662	-1.17921	0.222143	1.00063	4	4	116.02	O15063	GARRE1	Granule associated Rac and RHOG effector protein 1	AGFHLNPK;FLLGGSK;GAAEATSR;GVSFNESAADNLK
1.59064	1.52093	1.55318	1.51843	1.52641	1.55082	0.028827	0.717794	23	15	85.124	O15066	KIF3B	Kinesin-like protein KIF3B;Kinesin-like protein KIF3B, N-terminally processed	AEIHDLQEEHIK;AEIHDLQEEHIKER;AFFDEEEDHWK;AIVEDHSLVAEEK;ASYLEIYQEEIRDLLSK;DLSSFVTK;EFQEEIAR;EIEHVMNVGNQNR;EKDAAEMLGAK;ERPDTGVYVK;ETYSSLQQEVDIK;GVIPNSFDHIFTHISR;HLIIENFIPLEEK;LLQDSLGGNAK;LNLVDLAGSER;NIVDHTNEQQK;QELEQTQNELTR;RPVSAVGYK;RQEIAEQK;STHIPYR;SVGATNMNEHSSR;TVMVANVGPASYNVEETLTTLR;VVDVDVK
2.82648	2.68427	2.77949	2.74423	2.69977	2.75661	0.0661825	1.39089	31	31	144.73	O15067	PFAS	Phosphoribosylformylglycinamidine synthase	AFSITQGLLK;AGAELRR;ALWEETSFQLDR;ANQELGLALDSWDLDFYTK;ATGLGPVDR;DFLTHVSAR;EAPEPGMEVVK;ELSDPAGAIIYTSR;EPGGPSPR;ESWLLPGSNDLLLEVGPR;EWIKPIMFSGGIGSMEADHISK;FGEPVLAGFAR;FLRPEDPTRPSR;FQQQQGLR;GDPEMEQK;GHLLYVALSPGQHR;GQLHVDGQK;GVAFVGGFSYADVLGSAK;GWAAAVTFHPR;HLAVMPHPER;IVLVDDR;KPPMLQPLALPPGLSVHQALER;LPAVASK;LSFAHPPSAEVEAIALATLHDR;MTEQHFPHPIQSFSPESMPEPLNGPINILGEGR;NPSTVEAFDLAQSNSEHSR;RFQELQR;SLGLQLPDGQR;VGG…
-3.88277	-3.43735	-3.7485	-3.49499	-3.42169	-3.64705	-0.271033	1.55378	3	3	128.11	O15068	MCF2L	Guanine nucleotide exchange factor DBS	ALSLDGEQLIGNK;EEVYIVQAPTPEIK;EGHSVLESLR
0.198437	-0.0690289	0.0232878	-0.00366211	0.00866985	-0.0404339	0.0880076	0.628443	13	12	82.223	O15075	DCLK1	Serine/threonine-protein kinase DCLK1	AQPAPPELNSESEDYSPSSSETVR;AVSSLATAK;DASGMLYNLASAIK;DMELEHFDERDK;GGDLFDAITSTNK;GIVYAISPDR;GSPSEVR;NVNPNWSVNVK;SFEALLADLTR;TAHSFEQVLTDITDAIK;TIYTIDGLKK;TLSDNVNLPQGVR;YLHSLNIVHR
-2.48899	-2.77081	-2.70356	-2.66	-2.66518	-2.77901	0.032588	0.114925	3	3	290.38	O15078	CEP290	Centrosomal protein of 290 kDa	AQEVELALEEVEK;DREIEILTK;MTVQLEETGK
0.194752	0.168003	0.0726938	0.0528011	0.161748	0.172394	0.00518735	0.033713	11	9	112.96	O15084	ANKRD28	Serine/threonine-protein phosphatase 6 regulatory ankyrin repeat subunit A	DKNWQTPLHIAAANK;EDVNFQDNEK;GANINAFDKK;GHETSALLILEK;KLLSSGFDIDTPDDFGR;LLSSGFDIDTPDDFGR;TALHHAAFSGHGEMVK;TPLDLAAFK;TPLHMTALHGR;WLTPLHR;YGHELLINTLITSGADTAK
-2.33383	-2.38923	-2.48188	-2.43797	-2.4345	-2.42934	0.0146147	0.120247	13	13	167.7	O15085	ARHGEF11	Rho guanine nucleotide exchange factor 11	AQSAPDKDK;ASNPLAAEFK;DIWNIFLEK;DQHGFGFTVSGDR;EIDRQEVINELFVTEASHLR;EPAQQGPTPSRVELDDSDVFHGEPEPEELPGGTGSQQR;HTEGGTSEHEK;LGPPQIYELVALTSSDK;QLAALGDILSK;RLDATALER;VLDLIFYQR;WLPFFPK;YPLLLESIIK
0.427711	0.0944309	0.24701	0.125309	0.0950022	0.230185	0.165857	1.11955	13	13	67.315	O15091	PRORP	Mitochondrial ribonuclease P catalytic subunit	AFFDFGK;DIKDDNYSNK;DVIDGGDQYR;EALLLLEDIK;EALLLLEDIKK;ESQLLLNVVSQLAK;GLIHSDR;GYSLLIR;QVYSVPHFFLAGAAK;RFENFIK;SLLAWVAAK;SRPPFDVVIDGLNVAK;WQQGHQLAIVNR
-1.67604	-1.6651	-1.71638	-1.69509	-1.70651	-1.68814	0.0114956	0.27134	10	9	84.639	O15111	CHUK	Inhibitor of nuclear factor kappa-B kinase subunit alpha	DLKPENIVLQDVGGK;EIWHLLK;ELFGHLSK;ESQILSLLSDIGSGIR;ETGINTGSQELLSETGISLDPR;GGPVDLTLK;IIDLGYAK;IIDLLPK;IISFLLPPDESLHSLQSR;SIQLDLER
-4.00124	-3.79344	-3.75747	-3.78097	-3.79851	-3.82138	-0.051652	0.270683	3	3	15.179	O15116	LSM1	U6 snRNA-associated Sm-like protein LSm1	MNYMPGTASLIEDIDKK;SIDQFANLVLHQTVER;TLIGFLR
1.59542	1.13511	1.40697	1.249	1.2014	1.3635	0.203192	1.23346	13	13	142.17	O15118	NPC1	NPC intracellular cholesterol transporter 1	AFTVSMK;DNLQLPLQFLSR;DVEAPSSNDK;EFINFVK;EYFDQHFGPFFR;FLPMFLSDNPNPK;GGHAAYSSAVNILLGHGTR;LEKEYFDQHFGPFFR;LQGETLDQQLGR;QRPQGGDFMR;SISQYLHAGPPVYFVLEEGHDYTSSK;TEQLIIR;VTTNPVDLWSAPSSQAR
-1.7741	-1.77356	-1.95801	-1.83202	-1.79362	-1.93385	-0.0462379	0.242045	2	2	30.914	O15120	AGPAT2	1-acyl-sn-glycerol-3-phosphate acyltransferase beta	AMRTTFLHISK;VWIYPEGTR
-1.76166	-1.64273	-1.70867	-1.70711	-1.63201	-1.693	-0.0555293	0.935639	5	5	37.866	O15121	DEGS1	Sphingolipid delta(4)-desaturase DES1	EDFEWVYTDQPHADR;IAAEYYDNLPHYNSWIK;VLYDFVMDDTISPYSR;VSREDFEWVYTDQPHADR;YHMDHHR
1.12475	0.900421	1.05066	0.98201	0.968928	1.00235	0.0834173	1.27209	14	13	37.92	O15126	SCAMP1	Secretory carrier-associated membrane protein 1	AAELDRR;AQQEFATGVMSNK;EHALAQAELLK;EHALAQAELLKR;EMQNLSQHGR;KAAELDRR;MPNVPNTQPAIMKPTEEHPAYTQIAK;NVPPGLDEYNPFSDSR;RQEELER;SDFDSNPFADPDLNNPFKDPSVTQVTR;TPPPGGVK;TTGASFEK;TVQTAAANAASTAASSAAQNAFK
0.153303	-0.115084	0.0123892	-0.0328274	-0.0733805	-0.019846	0.0906747	0.749999	5	5	36.648	O15127	SCAMP2	Secretory carrier-associated membrane protein 2	AASSAAQGAFQGN;ELQNTVANLHVR;QQEELDR;QQEELDRK;TGASFQQAQEEFSQGIFSSR
2.93062	2.69923	2.79187	2.7271	2.71451	2.76283	0.102439	0.982327	14	14	40.949	O15143	ARPC1B	Actin-related protein 2/3 complex subunit 1B	ASSEGGTAAGAGLDSLHK;AYHSFLVEPISCHAWNK;EHNGQVTGIDWAPESNR;EVEERPAPTPWGSK;FAVGSGSR;FQNLDKK;IFSAYIK;IVTCGTDR;KASSEGGTAAGAGLDSLHK;NAYVWTLK;NSVSQISVLSGGK;SLESALK;TQIAICPNNHEVHIYEK;WAPNENK
3.85125	3.67096	3.78658	3.7194	3.71267	3.7675	0.0720132	1.17214	24	24	34.333	O15144	ARPC2	Actin-related protein 2/3 complex subunit 2	ARPDAEK;ARPDAEKK;ASHTAPQVLFSHR;ASHTAPQVLFSHREPPLELK;AVIHYRDDETMYVESK;AVIHYRDDETMYVESKK;DDETMYVESK;DNTINLIHTFR;DSIVHQAGMLK;DSIVHQAGMLKR;DTDAAVGDNIGYITFVLFPR;DYLHYHIK;ELQAHGADELLK;ELQAHGADELLKR;EPPLELK;EPPLELKDTDAAVGDNIGYITFVLFPR;FENAAAGNKPEAVEVTFADFDGVLYHISNPNGDK;IIEETLALK;MILLEVNNR;VFMQEFK;VMVSISLK;VTVVFSTVFKDDDDVVIGK;YFQFQEEGK;YFQFQEEGKEGENR
3.18034	2.92054	2.99411	2.96022	2.95027	3.01459	0.0919374	0.68777	10	10	20.546	O15145	ARPC3	Actin-related protein 2/3 complex subunit 3	AYLQQLR;DTDIVDEAIYYFK;ETKDTDIVDEAIYYFK;LIGNMALLPIR;NYEIKNEADR;PAYHSSLMDPDTK;QEDEVMR;SLSGPGQ;VFDPQNDKPSK;WWTCFVK
-2.65524	-2.46262	-2.52657	-2.55957	-2.46877	-2.50321	-0.0397635	0.259219	2	2	13.289	O15155	BET1	BET1 homolog	LLAEMDSQFDSTTGFLGK;SLSIEIGHEVK
-3.01145	-3.52571	-2.73822	-3.26172	-3.50664	-3.1046	0.450164	1.44183	3	3	58.026	O15156	ZBTB7B	Zinc finger and BTB domain-containing protein 7B	ANHLVPEVPTVPAHPLTYEEEEVAGR;FLHSYDLK;IIHGAGK
-0.00651741	-0.460878	-0.17879	-0.32728	-0.299729	-0.287369	0.185155	1.48426	10	10	39.249	O15160	POLR1C	DNA-directed RNA polymerases I and III subunit RPAC1	AASQAVEEMR;DSSDPNELYVNHK;FLDELDAVQMD;FSPVATASYR;ILLAEVPTMAVEK;LGLIPIHADPR;LLPDITLLEPVEGEAAEELSR;NQGDEEGTEIDTLQFR;VLVYNNTSIVQDEILAHR;VVLGEFGVR
-3.70981	-3.28825	-3.57512	-3.45364	-3.34308	-3.60752	-0.182476	0.990864	3	3	116.83	O15164	TRIM24	Transcription intermediary factor 1-alpha	ALLHQLESLAK;LENYFEELLK;VIIDTLITK
1.88746	1.50353	1.69222	1.63303	1.61779	1.74688	0.0996736	0.606641	11	11	23.818	O15173	PGRMC2	Membrane-associated progesterone receptor component 2	AAGDGDVK;DALRDEYDDLSDLNAVQMESVR;DFSLEQLR;EKYDYVGR;EWEMQFK;FYGPAGPYGIFAGR;GLGAGAGAGEESPATSLPR;ILLAVNGK;LLKPGEEPSEYTDEEDTKDHNKQD;RDFSLEQLR;RGLGAGAGAGEESPATSLPR
-5.726	-5.76717	-5.71431	-5.67376	-5.5453	-5.77097	-0.104845	0.574984	2	2	31.128	O15194	CTDSPL	CTD small phosphatase-like protein	YLLPEVTVLDYGK;YLLPEVTVLDYGKK
-3.01061	-3.04959	-3.00835	-3.09476	-3.04385	-3.04094	0.0312277	0.530492	3	3	18.472	O15205	UBD	Ubiquitin D	SLSSYGIDKEK;VPVQDQVLLLGSK;VVKPSDEELPLFLVESGDEAK
0.0138454	0.113857	-0.013875	0.0275707	0.0409193	-0.00836754	-0.0374616	0.707932	10	10	83.548	O15211	RGL2	Ral guanine nucleotide dissociation stimulator-like 2	AFTSTPALLGLMADR;ATVTQFNK;DSAVASEYELVQLLPGER;ELLVQEVK;GGGVVPYLGTFLK;GVGGGSADLIR;GYNLQPDHDIQR;LESFLLQTGYAAGK;LQSPLEPHSK;WLQGLRPLTEAQSHR
0.342716	-0.229677	0.197505	0.00702858	-0.0399046	0.0600128	0.223018	1.60768	9	9	14.582	O15212	PFDN6	Prefoldin subunit 6	EELALLDGSNVVFK;ETLAQLQQEFQR;LDYITAEIK;LEAQLTENNIVKEELALLDGSNVVFK;LLGPVLVK;LQGEVEK;QELGEAR;RLDYITAEIK;RLDYITAEIKR
-1.76097	-1.52207	-1.81057	-1.61593	-1.59193	-1.78517	-0.134247	0.986915	9	9	68.07	O15213	WDR46	WD repeat-containing protein 46	ALAEVDVISLEQGK;ALAEVDVISLEQGKK;ASPPSLEQPYLTHR;FLHSEALLAVAQNR;GLSGTQDPFPGPAPVPVEVVQK;HLAFGGR;RYWEEETVPTTAGASPGPPR;SELLLAEEPGFLEGEDGEDTAK;VMDEEHR
0.706059	0.376873	0.56688	0.547155	0.346168	0.499098	0.141282	0.828417	8	8	25.704	O15217	GSTA4	Glutathione S-transferase A4	EVVNMAQK;FLEPGSK;KKPPPDEIYVR;LQDGNHLLFQQVPMVEIDGMK;LSNIPTIK;SILHYIADK;TVYNIFRP;YFPVFEK
-0.896498	-0.975483	-1.00432	-0.988968	-1.09359	-0.97566	0.0669104	0.61839	7	7	77.187	O15228	GNPAT	Dihydroxyacetone phosphate acyltransferase	AIQEHPVVLLPSHR;DVFADEFIFLPGNTLK;EEVSEILDEMSHK;ESLQSVDVLR;ESTTGLLK;EVFDTYLVPISISYDK;KWDEFEDILEER
-0.380882	-0.407701	-0.503097	-0.370256	-0.469028	-0.453249	-0.0124226	0.0949858	9	9	55.809	O15229	KMO	Kynurenine 3-monooxygenase	AVDSLEQISNLISR;AVGLEDQIVSQGIPMR;DLLTAAEK;LLTSNDVVDFFQK;MIHSLSGK;SAIPYGTK;SINLALSHR;SQYILSVSR;YFPDAIPLIGEK
1.07455	1.22811	1.03664	1.14945	1.14298	1.04702	-0.0496438	0.624449	29	29	399.73	O15230	LAMA5	Laminin subunit alpha-5	AGALLPAIHEQLR;AHPASNAIDGTER;AIEASNAYSR;ALRDPTVTR;AVPLQPPPPLTSASK;AWSQEGPHR;DHYLPDLHHLR;DLGAPQAAAEAELAAAQR;DQASQLLAGTEATLGHAK;DTLASVFR;EAQELNSR;EPQATVVFTTHVPTLGR;GFGEPFVLNPGTWALR;GLLLFTAR;GPPPELQPQPEGPPR;GQDLGQAVLDAGHSVSTLEK;GQLQLVEGNFR;GYAQMAPVQPR;HVPEAVPEAFPELYWQAPPSYLGDR;ILLVTDGAR;LELEEAATPEGHAVR;LLHSLDQAK;LLHSLDQAKEELER;STGDPWLTDGSYLDGTGFAR;TLPQLLAK;TYQPWQFFASSK;VQEQLSSLWEENQALATQTR;VSSYGGTLR;…
0.774696	0.651587	0.724711	0.644711	0.747552	0.665749	0.0700626	0.932921	13	13	73.525	O15231	ZNF185	Zinc finger protein 185	APNTDAAR;APTGYIIR;ATSFSSAGEVPKPRPPSTR;DLAGEEAFR;EYVNASEVSSGKPVSAR;GALADYEGKDVATR;GGQGDPAVPTQQPADPSTPEQQNSPSGSEQFVR;GKPLPPGEEER;GVFTKPIDSSSQPQQQFPK;LAPYNIR;MTTEDYKK;RVEVVEEDGPSEK;YSNVSSIEDSFAMEK
-0.915594	-0.819124	-0.94745	-0.874525	-0.857192	-0.855026	-0.0613683	1.96905	4	4	76.277	O15234	CASC3	Protein CASC3	GLFFEHDLR;GQTQEEEVRPK;HLDDDEDRKNPAYIPR;KGLFFEHDLR
0.580811	0.301418	0.498984	0.439001	0.321832	0.491001	0.119205	1.00913	13	13	77.628	O15254	ACOX3	Peroxisomal acyl-coenzyme A oxidase 3	ADGELYK;ASTVEGGDTALLPEFPR;ELALFTEGEGMLR;FWVGNMGK;HAALLYR;MGDVTPEGTYVSPFK;NLWGAVLQESK;SLFLDLVELQR;SPGADLSLEK;SVDFLDAYPGILDQK;TIFSALENDPLFAR;TLLPMPGVMVGDIGK;TTAHYDPATEEFIIHSPDFEAAK
0.879505	0.92436	0.878552	0.965889	0.901591	0.881966	-0.0369492	0.660113	6	6	22.958	O15258	RER1	Protein RER1	LGQIYQSWLDK;QNEEFRPFIR;SEGDSVGESVHGKPSVVYR;STPYTAVR;VDPSLMEDSDDGPSLPTK;YIPFTHGK
0.186115	-0.000202179	0.0452013	0.0994644	-0.0169268	-0.020401	0.0688814	0.479987	5	5	30.394	O15260	SURF4	Surfeit locus protein 4	GQNDLMGTAEDFADQFLR;LCLISTFLEDGIR;MWFQWSEQR;QYLPHVAR;SMFAGVPTMR
1.37546	1.30172	1.32871	1.2999	1.28832	1.32599	0.0508378	1.33305	15	15	52.743	O15269	SPTLC1	Serine palmitoyltransferase 1	AAALASLK;AAALASLKK;ALQGISGLK;DHPALNYNIVSGPPSHK;EKEELIEEWQPEPLVPPVPK;EQEIEDQKNPR;EVAQAVLL;GDIVFVDR;HNDMADLER;LLKEQEIEDQK;LLKEQEIEDQKNPR;RGDIVFVDR;SFVIDHQR;VVGESLSPAFHLQLEESTGSR;VVVTVEQTEEELER
-0.496153	-0.747328	-0.640658	-0.666044	-0.725505	-0.637018	0.104073	0.989465	11	11	62.924	O15270	SPTLC2	Serine palmitoyltransferase 2	AYLYLDEAHSIGALGPTGR;DAIVYGQPR;EIDEVGDLLQLK;GVVEYFGLDPEDVDVMMGTFTK;LPEVIALK;LPEVIALKK;LVPLLDRPFDETTYEETED;NIGVVVVGFPATPIIESR;QEIGNLDKHEELEELVAR;QSHDYNWSFK;SFGASGGYIGGK
0.520115	0.40073	0.47498	0.430428	0.43094	0.475517	0.0417976	0.874015	19	19	116.92	O15294	OGT	UDP-N-acetylglucosamine--peptide N-acetylglucosaminyltransferase 110 kDa subunit	AATGEEVPR;AFLDSLPDVK;AIQINPAFADAHSNLASIHK;ALEVFPEFAAAHSNLASVLQQQGK;ASSVGNVADSTEPTKR;EQGNIEEAVR;EYQAGDFEAAER;FPAVGEPNIQQYAQNMGLPQNR;GQLQEAIEHYR;IIFSPVAPK;ISPTFADAYSNMGNTLK;KLVSIVADQLEK;LGTDLEYLK;LGTDLEYLKK;LQEALMHYK;LVSIVADQLEK;MLSFQGLAELAHR;QNPLLAEAYSNLGNVYK;SAHFSTLAIK
2.20374	1.75653	2.01152	1.88104	1.81115	1.93549	0.199269	1.26889	13	12	28.082	O15305	PMM2	Phosphomannomutase 2	AAPGPALCLFDVDGTLTAPR;EMDDFLQK;FVADLRK;GTFIEFR;HVENDGYK;IEFYELDK;IEFYELDKK;IGVVGGSDFEK;TIYFFGDK;TMGYSVTAPEDTRR;TMPGGNDHEIFTDPR;VQEQLGNDVVEK;YDYVFPENGLVAYK
1.1001	1.20397	1.09993	1.24421	1.12535	1.10885	-0.0617186	0.653933	10	10	68.86	O15321	TM9SF1	Transmembrane 9 superfamily member 1	AGDPVILYVNK;DVKPHSLDGLRPDEFLGLTHTYSVR;FRENVEK;GDDGGFFPR;GFVGYMEESGFLPHSHK;IIHTDVFR;MAESLYEIR;RGDDGGFFPR;SLSLGEVLDGDR;WSETSVER
-2.35902	-2.41282	-2.4389	-2.53339	-2.43876	-2.45037	0.0751769	0.932787	8	8	104.74	O15327	INPP4B	Inositol polyphosphate 4-phosphatase type II	ALLENLLQNIQSK;DALYDVITVGAPAAHFQGFK;DEHQLHK;DNLPFLNSVLK;EHYVVEVK;ELGELSPHWDNLR;MFESLPLQIK;TLEFVPINLHLQR
-0.769123	-0.810535	-0.857745	-0.811954	-0.786075	-0.828068	-0.0105426	0.134229	9	7	75.25	O15344	MID1	E3 ubiquitin-protein ligase Midline-1	AFDANTMTSAEK;AINQAGSR;EIPIEPAPHLR;KSHTPER;LIEPIPDSHIR;NTELETLLAK;QNLESNLTNLIK;VSHDNLTVER;VSHDNLTVERDESSSK
1.60438	1.25629	1.43365	1.16084	1.27847	1.36436	0.241682	1.4497	12	10	22.98	O15347	HMGB3	High mobility group protein B3	GKFDGAK;KDPNAPK;KKDPNAPK;KKVEEEDEEEEEEEEEEEEEEDE;KLGEMWNNLNDSEK;KNPEVPVNFAEFSK;KVEEEDEEEEEEEEEEEEEEDE;LGEMWNNLNDSEK;NPEVPVNFAEFSK;SKFDEMAK;STNPGISIGDVAK;YEKDVADYK
-3.97175	-2.7578	-3.68456	-2.91191	-3.03517	-3.51361	-0.644186	1.46754	1	1	68.924	O15353	FOXN1	Forkhead box protein N1	MQEELQK
1.52751	1.44844	1.46076	1.3978	1.48955	1.45963	0.0282911	0.310292	10	10	59.271	O15355	PPM1G	Protein phosphatase 1G	AIGDHFYK;ALDMSYDHKPEDEVELAR;ALEDAFLAIDAK;AYTGFSSNSER;DENGELR;EEPGSDSGTTAVVALIR;LPLPYGFSAMQGWR;LTTEEVIK;NLPPEEQMISALPDIK;QLIVANAGDSR
2.0829	1.92775	1.95874	1.944	1.93317	1.96037	0.0567582	0.622957	30	30	138.6	O15357	INPPL1	Phosphatidylinositol 3,4,5-trisphosphate 5-phosphatase 2	AAAEELLAR;ALQDMSSTAPPAPQPSTR;APVPSATK;DFIFVSAR;DFLSGIQK;DSQEDWTTFTHDR;DTYAWHK;ELTDLDYRPIAMQSLWNIK;GEETGNIR;GGASHLPHLTR;GSYGLDLEAVR;ILPDGEDFLAVQTSQGVPVR;ILPDGEDFLAVQTSQGVPVRR;ISHVSTSSVK;KEFEPLLR;LDVTLGDLTK;LGVVFEK;LLLDTLQLSK;LLQQQNLPQTGEQELESLVLK;LLSLGDR;LYEWISIDKDEAGAK;QLNAFDISLR;RNQNYLDILR;SALLPGPLELQPPR;SFENDAQSSDNINFLK;TIPVQAFEVK;TSDQAYIEFESIEAIVK;VAVLVKPEHENR;VDQLNLER;VLSGLEILSK
2.23783	2.01687	2.13401	2.0749	2.09633	2.11247	0.0753295	0.989774	16	16	63.972	O15371	EIF3D	Eukaryotic translation initiation factor 3 subunit D	DMPYQPFSK;DNSDFDLLTVSETANEPPQDEGNSFNSPR;DSSVEVR;EEMDFPQLMK;GAVIATELK;IFHTVTTTDDPVIR;IFHTVTTTDDPVIRK;LGDDIDLIVR;SDWEVKEEMDFPQLMK;SVYSWDIVVQR;TLNEWDSR;VADWTGATYQDK;VADWTGATYQDKR;YLILKDPNK;YNFPNPNPFVEDDMDKNEIASVAYR;YSSQFGGGSQYAYFHEEDESSFQLVDTAR
2.73805	2.58843	2.61525	2.54608	2.6186	2.62882	0.0605831	0.565072	22	22	39.93	O15372	EIF3H	Eukaryotic translation initiation factor 3 subunit H	ALLDSQFSYQHAIEESVVLIYDPIK;ANITFEYMFEEVPIVIK;DFSPEALK;DFSPEALKK;EFTAQNLGK;EGTGSTATSSSSTAGAAGK;EKDFSPEALK;EKDFSPEALKK;GEPPLPEEDLSK;GKGGSGDSAVK;HELLSLASSNHLGK;HYQEEGQGTEVVQGVLLGLVVEDR;KEGTGSTATSSSSTAGAAGK;LFKPPQPPAR;LFMAQALQEYNN;NSHLINVLMWELEK;QQENMQR;QVQIDGLVVLK;RQQENMQR;SAVADKHELLSLASSNHLGK;TAQGSLSLK;VDEMSQDIVK
-2.43101	-2.11607	-2.52604	-2.16494	-2.32227	-2.74114	-0.149278	0.319059	5	4	48.847	O15379	HDAC3	Histone deacetylase 3	FHSEDYIDFLQR;QTIFENLK;SFNIPLLVLGGGGYTVR;VMTVSFHK;YTGASLQGATQLNNK
-4.99658	-4.72175	-5.03824	-4.87784	-4.8507	-4.8289	-0.148704	2.41863	1	1	95.05	O15381	NVL	Nuclear valosin-containing protein-like	AVANESGLNFISVK
-0.354113	-0.148161	-0.341128	-0.288084	-0.186069	-0.239025	-0.0968812	1.39355	9	9	44.287	O15382	BCAT2	Branched-chain-amino-acid aminotransferase, mitochondrial	AADLQLEMTQKPHK;AHEWMFPV;AWVGGVGNYK;KPGPGEPLVFGK;LFRPWLNMDR;LGGNYGPTVLVQQEALK;LGGNYGPTVLVQQEALKR;NLHIPTMENGPELILR;QSLLDMAQTWGEFR
-1.3578	-1.27124	-1.27636	-1.28753	-1.32079	-1.25922	-0.00529798	0.0489033	10	10	119.94	O15397	IPO8	Importin-8	DAAWYQLLMAPLSEDQR;DNIVEGIIR;ETENDDVTNVIQK;EYFEFSEFFLK;GVLSAFNFGTVPSNN;IAAENELNQSYK;IINFAPSLLR;IIVSDHVEFPVR;TALQEVYTLAEHR;TYAVGIQQVLLK
0.359091	0.208883	0.276509	0.24682	0.201797	0.252935	0.0634365	0.832374	10	10	29.815	O15400	STX7	Syntaxin-7	EFGSLPTTPSEQR;ETDKYIK;ISSNIQK;LVAEFTTSLTNFQK;NLVSWESQTQPQVQVQDEEITEDDLR;QLEADIMDINEIFK;QQYTNQLAK;SYTPGVGGDPAQLAQR;TLNQLGTPQDSPELR;VSGSFPEDSSK
2.33212	2.14535	2.2165	2.16128	2.1997	2.23342	0.0421371	0.334037	10	10	49.469	O15427	SLC16A3	Monocarboxylate transporter 4	AEPEKNGEVVHTPETSV;AVSVFFK;DLGVPDTK;EPQPEVAAAEEEK;EPQPEVAAAEEEKLHKPPADSGVDLR;EVEHFLK;GGAVVDEGPTGVK;LHKPPADSGVDLR;LLDLSVFR;NGEVVHTPETSV
2.02106	1.96404	1.9511	1.91742	1.94436	1.9491	0.0300147	0.435958	29	28	149.52	O15439	ABCC4	ATP-binding cassette sub-family C member 4	AASQILILK;AEAAALTETAK;AENDAQKPSLTR;APVLFFDR;AVYQDADIYLLDDPLSAVDAEVSR;DGALESQDTENVPVTLSEENR;DLQLLEDGDLTVIGDR;EAPWEYQK;ETIEDLPGKMDTELAESGSNFSVGQR;GTTLSGGQK;GTYTEFLK;HLTALIK;IAYVSQQPWVFSGTLR;ILTTEIGLHDLR;IQTFLLLDEISQR;LKEYDEPYVLLQNK;LNTIIDSDK;LSEPEGK;MSIIPQEPVLFTGTMR;MVHVQDFTAFWDK;RLEEDDMYSVLPEDR;RLESTTR;SGIDFGSLLK;SNILFGK;SQHLGEELQGFWDK;SQHLGEELQGFWDKEVLR;SSLISALFR;VIEYTDLEK;VIQPIFLGK
0.469831	0.556633	0.407144	0.521479	0.438617	0.464104	-0.0593071	0.708746	17	17	160.66	O15440;Q92887	ABCC5	ATP-binding cassette sub-family C member 5	AFSQSVQK;AVKPEEGQLVQLEEK;EYIIPSPGYR;FFDTTPTGR;GANLSGGQR;GHLLLDSDERPSPEEEEGK;GQEFLHR;ILDEEHPK;ISDIGLADLR;KGELSMEDVWSLSK;LHDELFR;LSIIPQEPVLFSGTVR;LWQEELNEVGPDAASLR;SLFLMEEVHMIK;SLSEASVAVDR;TLHSIDLEIQEGK;YRENLPLVLK
-1.06398	-0.982553	-1.03549	-1.05934	-0.976523	-1.01872	-0.0427895	0.705629	8	8	54.985	O15446	POLR1G	DNA-directed RNA polymerase I subunit RPA34	ATPGSTK;EPEAAGPVGTEPTVETLEPLGVLFPSTTK;GHTVTEPIQPLEPELPGEGQPEAR;GKETFEPEDK;ILEGPQQSLSGSPLQPIPASPPPQIPPGLRPR;QEQINTEPLEDTVLSPTK;SALAPNLLTSGK;VEPLEEAIPLPPTK
-1.00857	-1.06261	-1.08147	-1.07281	-1.10091	-1.0727	0.0184129	0.245201	8	8	103.83	O15455	TLR3	Toll-like receptor 3	HANPGGPIYFLK;IDDFSFQWLK;KLELSSNQIK;LEILDLQHNNLAR;LQVALGSK;QTEQFEYAAYIIHAYK;VLNLQHNELSQLSDK;YSQLTSLDVGFNTISK
2.24753	2.03085	2.07151	1.98174	2.06719	2.07294	0.0785179	0.478141	18	18	60.901	O15460	P4HA2	Prolyl 4-hydroxylase subunit alpha-2	APQLLIAPFKEEDEWDSPHIVR;ATVRDPK;ELVQSLK;EYILVEEAK;GELPGTK;LDPGTISR;LLSLDPSHER;MEALTSK;MQHITGLTVK;QLDAGEEATTTK;SAADAEGYLAHPVNAYK;SAYNEGDYYHTVLWMEQVLK;SSWLEEDDDPVVAR;TAELLQVANYGVGGQYEPHFDFSR;TGVLTVASYR;YFEQLLEEER;YFEQLLEEEREK;YYDVMSDEEIER
2.30775	2.25884	2.20823	2.19775	2.22587	2.24039	0.0311457	0.416757	23	23	73.168	O15484	CAPN5	Calpain-5	AASSIYINSR;ADPDNLQALHTLHLR;AVTAADMEAR;DSPTGANSYVIIK;DTFFQNPQYIFEVK;EGKGENLAIGFDIYKVEENR;EWNGPWSDTSEEWQK;GENLAIGFDIYK;GENLAIGFDIYKVEENR;GGLISASIK;GHAYAVTDVR;GTPGPAVR;GTSTPEYNVK;KVLFEDPLFPATDDSLYYK;LGHGLLAFFK;LHGAWTLHEDPR;LSQPITVQVWNHR;MHSLQHK;VINTSHLSIHK;VLFEDPLFPATDDSLYYK;VLKDEFLGQVHLK;YFTDIIK;YVIIPTTFEPGHTGEFLLR
0.463331	-0.0419235	0.260205	0.0918026	0.0928068	0.141409	0.193508	1.06762	6	6	55.183	O15488	GYG2	Glycogenin-2	ELSPEEER;LVVLITPQVSSLLR;RPELGLTLTK;SVQAGEAR;VESVSSEETFEPSQELPAEALR;VKELSPEEER
1.93102	1.79675	1.87865	1.84527	1.85179	1.86807	0.0253849	0.358512	12	12	22.417	O15498	YKT6	Synaptobrevin homolog YKT6	AAYDVSSFSFFQR;EADPMTK;GEKLDDLVSK;IDWPVGSPATIHYPALDGHLSR;IILHNTMESLLER;LYSLSVLYK;NDSLAGVVIADNEYPSR;SEVLGTQSK;SSVQEFMTFTSQLIVER;VAFTLLEK;VLDEFSK;VQAELDETK
-2.70161	-2.98128	-2.88468	-3.06269	-2.79936	-3.13016	0.176734	0.686049	4	4	44.871	O15504	NUP42	Nucleoporin NUP42	EGFGLSENPFASLSPDEQKDEK;IPLKPPPLELLNV;KLLEGIVK;SPAASSFGSPGFSGLPASLATGPVR
3.89415	3.87039	3.82932	3.90432	3.85457	3.83909	-0.0139624	0.184688	9	9	16.32	O15511	ARPC5	Actin-related protein 2/3 complex subunit 5	AGSIVLK;ALAAGGVGSIVR;AVQSLDK;AVQSLDKNGVDLLMK;GFESPSDNSSAMLLQWHEK;NPPINTK;NTVSSAR;QGNMTAALQAALK;VDVDEYDENK
-5.96171	-6.07102	-6.01405	-6.0922	-5.9266	-5.97095	0.046786	0.29513	1	1	16.311	O15514	POLR2D	DNA-directed RNA polymerase II subunit RPB4	AGDVEEDASQLIFPK
0.467482	0.518282	0.388698	0.49884	0.454993	0.437382	-0.0377388	0.574314	14	14	63.151	O15530;Q6A1A2	PDPK1;PDPK2P	3-phosphoinositide-dependent protein kinase 1;Putative 3-phosphoinositide-dependent protein kinase 2	AGNEYLIFQK;ANSFVGTAQYVSPELLTEK;DLKPENILLNEDMHIQITDFGTAK;GEIPWSQELRPEAK;ILGEGSFSTVVLAR;KIQEVWR;LDHPFFVK;LEYDFPEK;LLVLDATK;LYFTFQDDEK;QLLLTEGPHLYYVDPVNK;TFFVHTPNR;VLSPESK;YQSHPDAAVQ
-0.447252	-0.914955	-0.640431	-0.754715	-0.795426	-0.691301	0.182021	1.27549	5	5	47.57	O15533	TAPBP	Tapasin	FVPLPASAK;HHSDGSVSLSGHLQPPPVTTEQHGAR;IHHPSLPASGR;RPGALLLR;VSLMPATLAR
1.15624	0.77372	0.955314	0.867767	0.962895	0.981781	0.0733007	0.377776	6	6	14.889	O15540	FABP7	Fatty acid-binding protein, brain	ALGVGFATR;LTNSQNFDEYMK;QVGNVTKPTVIISQEGDK;QVGNVTKPTVIISQEGDKVVIR;SVVSLDGDK;SVVSLDGDKLVHIQK
-1.30981	-1.56128	-1.38645	-1.45888	-1.54244	-1.36507	0.103288	0.858179	3	3	23.318	O15551	CLDN3	Claudin-3	DFYNPVVPEAQK;STGPGASLGTGYDR;VVYSAPR
3.36372	3.15239	3.21965	3.19688	3.17901	3.22549	0.0645898	0.559445	35	34	90.932	O43143	DHX15	ATP-dependent RNA helicase DHX15	ALVTGYFMQVAHLER;ASTNAMLISAGLPPLK;AYKTEMQDNTYPEILR;DYYINIR;EAMNDPLLER;EVDDLGPEVGDIK;FAHIDGDHLTLLNVYHAFK;FTDILVR;HQSFVLVGETGSGK;HRLDLGEDYPSGK;IFEPPPPK;IFEPPPPKK;IIPLYSTLPPQQQQR;KAADEAK;KLGIDDLVHFDFMDPPAPETLMR;LDLGEDYPSGK;LGIDDLVHFDFMDPPAPETLMR;LQLPVWEYK;LQLPVWEYKDR;REVDDLGPEVGDIK;RLQLPVWEYK;SLMSADNVR;SNLGSVVLQLK;STDFTSR;TEMQDNTYPEILR;TGHYLTVK;THPVEIFYTPEPERDYLEAAIR;TLATDILMGVLK;VAAMSVAQR;VADEMDVMLG…
2.21952	1.91328	2.09925	1.9486	1.9814	2.0653	0.138919	1.21249	19	19	54.843	O43148	RNMT	mRNA cap guanine-N7 methyltransferase	ASVNSETESSFNINENTTASGTGLSEK;DSEYIFSAEFITADSSK;EFEDDLVK;ETEDVPK;ETEDVPKDK;IALEDVPEK;IKNNENK;KIALEDVPEK;KLDPEIVPEEK;KTFLEFYEEK;LEASETESFGNEIYTVK;LSPGGYFIGTTPNSFELIR;LVSEKVDDYEHAAK;MQALEPYPANESSK;NLEEGHSSTVAAHYNELQEVGLEK;RLEASETESFGNEIYTVK;SVLIGEFLEK;TFLEFYEEK;VDDYEHAAK
2.27224	2.03853	2.13022	2.04311	2.04115	2.10397	0.11319	1.01375	42	42	331.07	O43149	ZZEF1	Zinc finger ZZ-type and EF-hand domain-containing protein 1	AHGFEEIR;AIHLLLR;AILESLFSQYSGK;ALTELFFVTENR;AQAQSILEVLK;ASTIFSTGTESAFQVTQIR;ATFLQTDLLK;AVIVDVK;DFELPGDTLYYR;DGFLTETGK;DLAVDLIEK;DVMDFIK;EFSVLTELLK;EINALAEHGDLELDER;ESLDQLVQK;FLPTGISSK;FQTGFEILK;FTVTAGHLGR;GEESVTLEQFR;GFSSLNDR;HNLFAAGDSSIVPDGWK;IALSEEFAQVYSLADGIR;IAQEDPEK;KAQAQSILEVLK;KLDPLEGLDEPTR;KLDVETWQQEQPVVLHTWTK;LEEQSAK;LISSTESELQQSYAK;LPSSSGLPAADVSPATAEEPLSPSTPTR;NSSGANLQGELSHIIR;QLGSNMVVP…
-0.515478	-0.581194	-0.605441	-0.579182	-0.523496	-0.539772	-0.00820414	0.0940483	10	7	111.65	O43150	ASAP2	Arf-GAP with SH3 domain, ANK repeat and PH domain-containing protein 2	AINSSGLAHVENEEQYTQALEK;ASIEIANESGETPLDIAK;AVESLKPSIETLSTDLHTIK;AWKDYETK;EIISEVQR;ELGVHYSR;GVDLLQNLIK;KGVDLLQNLIK;NTVAAIEEALDVDR;VTSTNPLTPTPPPPVAK
-6.77432	-6.46073	-6.7477	-6.53671	-6.6229	-6.66428	-0.144959	1.68045	5	5	74.048	O43155	FLRT2	Leucine-rich repeat transmembrane protein FLRT2	AALAQLLK;GIAEGTFSHLTK;LIVDGNLLTNK;LYLQDNQINHIPLTAFSNLR;MLTQGVFDNLSNLK
-6.72813	-6.57238	-6.62955	-6.72969	-6.6771	-6.44494	-0.188626	0.529562	1	1	122.07	O43156	TTI1	TELO2-interacting protein 1 homolog	ALIQVLELDVADIK
1.77207	1.83611	1.72575	1.82434	1.76973	1.76641	-0.0431499	0.847637	35	32	232.3	O43157	PLXNB1	Plexin-B1	AIPEIYLTR;ALWPPDPQAAFSYEETAK;AYVASLLTVALHGK;DLGVPESR;DLQAQSR;DSVGEPLYMLFR;EAPDSLPEFTVQMGNLR;EDVEYRPLTLNALLAVGPGAGEAQGVPVK;ENQDYVPGER;FIHTLESQR;FWINIIK;GPVDSVTGK;GQNLDVVQTPR;GVGGGIPPITTR;GVPLTQRPDPR;GVSEHDFAYQDPK;IFFPGHR;KVQIQLENLESSVR;LEYFTDILR;LNTLQHYK;LQQIAAAVENK;MLDQLYK;RLNTLQHYK;RPTVEQGLGQLSNLLNSK;RTETVVEK;SGVAGHLILSDEDVTSEVQGLWR;TLLSDLVAQYVAK;TPALPGLPEDPWVR;TPMLEDVDEGGIRPWHLVKPSDEPEPPRPR;VAL…
-1.65562	-1.74155	-1.78392	-1.73732	-1.79416	-1.75153	0.0247135	0.218713	7	7	50.714	O43159	RRP8	Ribosomal RNA-processing protein 8	DLTNSHFFLFDFQK;GFQSQVK;GSTTNDPPK;KWPLQPVDR;LFQEDPEAFLLYHR;MFEEPEWAEAAPVAAGLGPVISRPPPAASSQNK;YLNEQLYSGPSSAAQR
-2.9453	-3.10645	-2.84461	-2.94759	-3.09435	-2.88172	0.0987069	0.617354	5	4	200.03	O43166	SIPA1L1	Signal-induced proliferation-associated 1-like protein 1	GSVLEDAIPSTAK;QPMPDPGLMPLPDTAADLDWSNLVDAAK;TGPSLHR;VAVATLSHEQMIDLLR;VINAENAAHK
1.44999	1.42851	1.46792	1.50597	1.42881	1.42856	0.00017039	0.00208895	8	8	16.694	O43169	CYB5B	Cytochrome b5 type B	ELWLVIHGR;FLNEHPGGEEVLLEQAGVDASESFEDVGHSSDAR;GQEVETSVTYYR;LEEVAKR;QYYIGDIHPSDLKPESGSK;SGSMATAEASGSDGK;SGSMATAEASGSDGKGQEVETSVTYYR;YYTSESK
1.55035	1.57432	1.48439	1.53635	1.53171	1.53879	-0.00981903	0.178261	18	18	58.449	O43172	PRPF4	U4/U6 small nuclear ribonucleoprotein Prp4	ALGEPITLFGEGPAER;APDDLVAPVVK;EIPETTR;FEPIHGNFLLTGAYDNTAK;GESGILGK;GHNTNVGAIVFHPK;IWTHPGWSPLK;KPHIYYGSLEEK;LWSLDSDEPVADIEGHTVR;NILSVVGTDALK;NILSVVGTDALKK;QAEVLAEFER;QINVSTDDSEVK;SKEEYQQTWYHEGPNSLK;STVSLDPK;TKAPDDLVAPVVK;TLAGHEGK;VMWHPSGR
3.12097	2.68183	2.97868	2.79006	2.86058	2.90443	0.155204	1.07092	18	18	56.65	O43175	PHGDH	D-3-phosphoglycerate dehydrogenase	AGTGVDNVDLEAATR;AGTGVDNVDLEAATRK;ALQSGQCAGAALDVFTEEPPRDR;ALVDHENVISCPHLGASTK;AWAGSPK;DLPLLLFR;FMGTELNGK;GGIVDEGALLR;GTIQVITQGTSLK;ILQDGGLQVVEK;KILQDGGLQVVEK;MQSFGMK;QADVNLVNAK;QHVTEAFQFHF;QIPQATASMK;TLGILGLGR;TQTSDPAMLPTMIGLLAEAGVR;VTADVINAAEK
0.321896	-0.109161	0.165265	0.0545731	-0.130721	0.13213	0.207906	1.06523	4	4	20.108	O43181	NDUFS4	NADH dehydrogenase [ubiquinone] iron-sulfur protein 4, mitochondrial	EDAVSFAEK;LDITTLTGVPEEHIK;NNMQSGVNNTK;SYGANFSWNK
2.07592	1.82446	1.92712	1.89869	1.83977	1.90608	0.103301	0.954825	23	23	54.099	O43237	DYNC1LI2	Cytoplasmic dynein 1 light intermediate chain 2	ASESPAR;DAVFIPAGWDNEK;DAVFIPAGWDNEKK;DFQDYMEPEEGCQGSPQR;EHDYRDEHLDFIQSHLR;ELAAEDEQVFLMK;GGPASVPSSSPGTSVK;GLEYLYLSVHDEDRDDHTR;GPSGSPR;IAILHENFTTVKPEDAYEDFIVKPPVR;KLVHDKELAAEDEQVFLMK;KPDPNIK;KPDSMVTNSSTENEA;KTGSPGSPGAGGVQSTAK;LQGAEHGK;LQGAEHGKK;LVHDKELAAEDEQVFLMK;NILVFGEDGSGK;NLDLLYK;QQSLLAK;TGSPGSPGAGGVQSTAK;TVLSNVQEELDR;TYGFHFTTPALVVEK
3.94403	3.83697	3.83409	3.84702	3.84656	3.86713	0.0157413	0.154979	36	36	60.977	O43242	PSMD3	26S proteasome non-ATPase regulatory subunit 3	AIQLEYSEAR;ALDLVAAK;APQHTAVGFK;AVQGFFTSNNATR;DFLLPFLEEPMDTEADLQFRPR;DGVIEASINHEK;DLESAEER;DLESAEERR;EEAATGGGSTGEADGK;ELDTVTLEDIK;ELDTVTLEDIKEHVK;EMAEDDDDSFP;EMIDIYSTR;EPQLAFHQR;EQQDLEFAK;EQQDLEFAKEMAEDDDDSFP;EREQQDLEFAK;FNQVLDQFGEK;FQADGTYTLIIR;HDADGQATLLNLLLR;ISDDLMQK;ISLADIAQK;KAPQHTAVGFK;LNHYVLYK;LQLDSPEDAEFIVAK;MLPSTSR;NYLHYSLYDQAEK;RLNHYVLYK;SLMPYFLLTQAVR;SVFPEQANNNEWAR;SYNKDLESAEER;TAAAAAEH…
-1.67166	-1.76845	-1.75943	-1.83942	-1.70299	-1.75852	0.0546392	0.507481	4	4	41.373	O43251;Q9NWB1;A6NFN3	RBFOX2;RBFOX1;RBFOX3	RNA binding protein fox-1 homolog 2;RNA binding protein fox-1 homolog 1;RNA binding protein fox-1 homolog 3	EKLHGTVVEGR;GFGFVTFENSADADR;KIEVNNATAR;LHVSNIPFR
0.916117	0.725641	0.776231	0.738651	0.760575	0.812668	0.0618362	0.573807	19	19	70.832	O43252	PAPSS1	Bifunctional 3-phosphoadenosine 5-phosphosulfate synthase 1;Sulfate adenylyltransferase;Adenylyl-sulfate kinase	ATNVTYQAHHVSR;AWTVLTEYYK;DDDVPLMWR;DIVPVDASYEVK;DLYEPSHGAK;DPAGMPHPETGK;DPAGMPHPETGKDLYEPSHGAK;EGQKPPEGFMAPK;ELYVPENK;GFTGIDSEYEKPEAPELVLK;LTPTELK;MDYYDSEHHEDFEFISGTR;NLGFSPEDREENVR;NLGFSPEDREENVRR;NPEFFEHR;RPVLLLHPLGGWTK;TDAETLPALK;VAAYNKK;VYWNDGLDQYR
0.88398	0.769142	0.81004	0.816772	0.764375	0.799875	0.0390536	0.580965	19	19	88.828	O43264	ZW10	Centromere/kinetochore protein zw10 homolog	ALFQNTER;AMGTLLNTAISEVIGK;ASFVTEVLAHSGR;DLHVSTGEFTDLK;DSVVLSLLK;GDTTDLLK;GPLAAAFSSSEVK;INVPELPTPDEDNKLEVQK;ITALEDISTEDGDR;KYQEEVPVYVPK;LSEDIDLLK;LVLEVLQK;NINSHFANK;QLLDLPLDTDLENEK;QNILYHLGEEWQK;QVLHQLK;SFGQMLLK;TVMDEGPQVFAPLSEESK;YQEEVPVYVPK
1.98061	1.60214	1.85716	1.74738	1.73193	1.79305	0.123784	1.05776	26	26	90.254	O43290	SART1	U4/U6.U5 tri-snRNP-associated protein 1	ADDLLPLGDQTQDGDFGSR;DGYKPDVK;DLQGLTVEHAIDSFR;EAGTKEEPVTADVINPMALR;EEPVTADVINPMALR;EGETMILTLKDK;GFTQDFK;GLLETTVQK;GWEEDEDPER;IEYVDETGR;IEYVDETGRK;KLDEEALLK;LASEYLTPEEMVTFK;LASEYLTPEEMVTFKK;LEQGGTADGLR;LGLKPLEVNAIK;LQAQSLSTVGPR;MSSSDTPLGTVALLQEK;QLQQLQQLR;QQQDFSASSTTILDEEPIVNR;RGAEAEAR;TLGEDDPWLDDTAAWIER;TPYIVLSGSGK;TSSGDASSLSIEETNK;VSEVEEEK;YDEELEGERPHSFR
0.0546341	-0.34943	-0.0898771	-0.174459	-0.189216	-0.132429	0.127553	1.21398	5	5	67.622	O43292	GPAA1	Glycosylphosphatidylinositol anchor attachment 1 protein	GLLSDPVRR;GQIYWAK;KLPFPDETHER;SGALPVAWLER;YRVEALTLR
-0.674007	-0.711079	-0.773274	-0.696815	-0.716798	-0.703117	-0.0192115	0.261572	8	8	52.535	O43293;Q9UIK4	DAPK3	Death-associated protein kinase 3	EAWYREESDSLGQDLR;GALLGTSGLK;IAHFDLKPENIMLLDK;IEAGNEFK;LIDFGIAHK;QEDVEDHYEMGEELGSGQFAIVR;QILDGVHYLHSK;VLEEAAAAEEGLR
-4.92742	-5.08691	-4.98317	-4.88572	-5.05423	-4.95213	0.00817521	0.0546526	2	2	49.814	O43294	TGFB1I1	Transforming growth factor beta-1-induced transcript 1 protein	GSLDTMLGLLQSDLSR;RDFLQLFAPR
-4.11932	-4.23779	-4.44902	-4.01641	-4.09882	-4.33403	-0.142192	0.454645	1	1	52.63	O43298	ZBTB43	Zinc finger and BTB domain-containing protein 43	VEFPDFSSTILQK
-0.959639	-1.1378	-1.00406	-1.20697	-1.02984	-1.03226	0.107351	0.828988	8	8	88.604	O43299	AP5Z1	AP-5 complex subunit zeta-1	ASLLLSK;ATELLTLLK;AWLLHSGPEGPGTLDTDDRSEQEGSTLSVISATSSAGR;EIQDEELKK;LLQAEDLGPDTLDSLQR;LSFPNLFK;MFSAGAESLLHQAR;VVVLSPGTLQEDQATLLSK
-2.54213	-2.29164	-2.55167	-2.38879	-2.40129	-2.49269	-0.131288	1.70135	5	5	74.977	O43301	HSPA12A	Heat shock 70 kDa protein 12A	DFYHDLDPNEAK;GAVLFGLDPAVIK;IFGEDFIEQFK;IIIPQDVGLTILK;LPEGHLK
-4.07865	-3.72277	-4.14866	-4.00027	-3.80912	-4.11073	-0.109997	0.504728	1	1	130.61	O43306	ADCY6	Adenylate cyclase type 6	GTQDALNPEDEVDEFLSR
-5.27409	-5.62657	-5.58461	-5.51657	-5.50692	-5.37501	0.0433839	0.161703	1	1	74.819	Q96N96;Q9NR80;O43307	SPATA13;ARHGEF4;ARHGEF9	Spermatogenesis-associated protein 13;Rho guanine nucleotide exchange factor 4;Rho guanine nucleotide exchange factor 9	YPLQLAELLK
-2.59156	-2.36976	-2.53522	-2.44783	-2.39647	-2.51291	-0.0975548	1.15413	7	7	67.586	O43310	CTIF	CBP80/20-dependent translation initiation factor	EELQQQDVER;GKLEDGDGINLNDIEK;HNRDHQK;ITLLQSSK;LDFTQFHR;LIEILNSMR;SLLLNMLQK
-2.34268	-2.25838	-2.3381	-2.18454	-2.34745	-2.24435	-0.0842698	0.818573	6	5	82.25	O43312	MTSS1	Protein MTSS 1	GDIQPQLDSALQDVNDK;GSYPVWEDFINK;LPSSSEQVILDLK;TTVVAAAAFLDAFQK;VADMATNTR;VANQLDKDHAK
0.14584	0.164854	0.167977	0.171942	0.162017	0.168438	-0.0118319	0.76295	13	10	140.41	O43314	PPIP5K2	Inositol hexakisphosphate and diphosphoinositol-pentakisphosphate kinase 2	ALADIVIPQEYGITK;DRDFTAEDYEK;EVYSILQAEGILLPR;FFDLFEK;GVLSPER;ILPTPPATLK;IYASDEGR;LHEILQK;LTPSGSISLIK;QLQEVLDIAR;QVDEFLASIASPSSDVPR;VQMTAAAFAK;VYTVGPDYAHAEAR
-0.863676	-1.2669	-1.04543	-1.17821	-1.14966	-1.08727	0.167494	1.28417	9	9	67.195	O43318	MAP3K7	Mitogen-activated protein kinase kinase kinase 7	DLKPPNLLLVAGGTVLK;GSAAWMAPEVFEGSNYSEK;KAFIVELR;KQELVAELDQDEKDQQNTSR;NLPKPIESLMTR;QIESESER;RKPFDEIGGPAFR;VNHPNIVK;VQTEIALLLQR
1.31396	1.19694	1.36176	1.27558	1.24571	1.249	0.0556825	0.850223	10	10	19.81	O43324	EEF1E1	Eukaryotic translation elongation factor 1 epsilon-1	AAAAELSLLEK;AIVQQWLEYR;DLNSYLEDK;EYLLGSTAEEK;FIVDLTVQEK;NDIHTLLK;QANKEYLLGSTAEEK;QHLSSVVFIK;VTQVDGHSSK;YSAQGER
-2.05428	-2.58059	-2.80691	-2.64088	-2.71251	-2.77449	0.188131	0.323852	2	2	14.281	O43325	LYRM1	LYR motif-containing protein 1	IEIGLHYK;NLTDTDLIK
-0.182047	-0.264521	-0.287719	-0.313076	-0.227242	-0.260386	0.0124175	0.101302	8	7	39.124	O43347	MSI1	RNA-binding protein Musashi homolog 1	EVMSPTGSAR;EYFGQFGEVK;GFGFVTFESEDIVEK;GFGFVTFMDQAGVDK;IFVGGLSVNTTVEDVK;MFIGGLSWQTTQEGLR;QYFEQFGK;VDDAMLMFDK
-3.0413	-3.05197	-3.03231	-3.02094	-2.97608	-3.01048	-0.0203889	0.447464	3	2	61.194	O43353	RIPK2	Receptor-interacting serine/threonine-protein kinase 2	EAEILHK;IADFGLSK;QLLDTTDIQGEEFAK
3.3913	3.00206	3.20883	3.08116	3.09014	3.18207	0.142623	0.906909	32	24	70.942	O43390	HNRNPR	Heterogeneous nuclear ribonucleoprotein R	ADGYNQPDSK;AGPIWDLR;AMDEMNGK;DLYEDELVPLFEK;DYAFVHFEDR;EAAQEAVK;EFNEEGALSVLQQFK;EIEGEEIEIVLAKPPDK;EIEGEEIEIVLAKPPDKK;ENILEEFSK;ESDLSHVQNK;GFCFLEYEDHK;GYAFITFCGK;KADGYNQPDSK;KADGYNQPDSKR;KYGGPPPDSVYSGVQPGIGTEVFVGK;LDEIFQTGLVAYVDLDER;LFVGSIPK;LKDYAFVHFEDR;LMMDPLSGQNR;NLATTVTEEILEK;SFSEFGK;STAYEDYYYHPPPR;TGYTLDVTTGQR;TKENILEEFSK;TLIEAGLPQK;VQESTKGPDEAK;VTEGLVDVILYHQPDDK;VTEGLVDVILYHQPDDKK;VTEGLVDVILY…
1.811	1.73386	1.72165	1.66917	1.77208	1.74337	0.0242488	0.223313	22	22	77.528	O43395	PRPF3	U4/U6 small nuclear ribonucleoprotein Prp3	AADHLKPFLDDSTLR;AHEEANAAR;DVNVVVVEGGPK;EAQKELQEK;EIELTHR;EKPSEDMESNTFFDPR;ELDELKPWIEK;ELKEVFGDDSEISK;EVFGDDSEISK;FEEVEEEPEVIPGPPSESPGMLTK;FVDKLFEAVEEGR;LALIAPK;LFEAVEEGR;LGLMPPPEPK;LPIGNTIQPSQAATFMNDAIEK;LQAEISQAAR;QLSFISPPTPQPK;RELDELKPWIEK;TPSSSQPER;VELKDQTKPTPLILDEQGR;VLGTEAVQDPTK;VLGTEAVQDPTKVEAHVR
2.67678	2.22876	2.59051	2.40388	2.27032	2.50546	0.227553	1.43694	12	12	32.251	O43396	TXNL1	Thioredoxin-like protein 1	FQGPDNGQGPK;FQNVNSVTIFVQSNQGEEETTR;GYMDLMPFINK;IAPAFSSMSNK;IDQYQGADAVGLEEK;IFINLPR;IKQHLENDPGSNEDTDIPK;ISYFTFIGTPVQATNMNDFK;QHLENDPGSNEDTDIPK;SEPTQALELTEDDIKEDGIVPLR;SMDFEEAER;VGVKPVGSDPDFQPELSGAGSR
2.08267	1.64028	1.95799	1.74593	1.79258	1.80406	0.216255	2.01933	15	15	22.237	O43399	TPD52L2	Tumor protein D54	AELTKVEEEIVTLR;GLLSDSMTDVPVDTGVAAR;KTQETLSQAGQK;LGEWNEK;LGLSTLGELK;MDSAGQDINLNSPNK;SWHDVQVSSAYVK;TPAVEGLTEAEEEELR;TPAVEGLTEAEEEELRAELTK;TQETLSQAGQK;TSAALSTVGSAISR;VEEEIVTLR;VTQSDLYK;VTQSDLYKK;VVGDRENGSDNLPSSAGSGDKPLSDPAPF
-0.58317	-0.996618	-0.672976	-0.953325	-0.845456	-0.743109	0.194447	1.29297	6	6	23.773	O43402	EMC8	ER membrane protein complex subunit 8	IAEGFSDTALIMVDNTK;ISASLLDSR;MVLHGAK;SYETLVDFDNHLDDIR;SYETLVDFDNHLDDIRNDWTNPEINK;VKDASPNQVAEK
0.031599	-0.355698	-0.0565042	-0.24872	-0.331582	-0.152964	0.217801	1.67198	3	3	37.238	O43414	ERI3	ERI1 exoribonuclease 3	EGLLDPNVK;NIANIMK;VDEWMAK
-1.48631	-1.43729	-1.47794	-1.5054	-1.51084	-1.52012	-0.00925827	0.0827736	9	9	173.1	O43426	SYNJ1	Synaptojanin-1	EVIAVQGPPDGTVLVSIK;GFEANAPAFDR;GSVPLFWEQPGLQVGSHR;QIIVNLLGSK;QQNWDSLIAGDQLINQK;SAEDLDLLNASFQDESK;TNSVQAFLGLEMLAK;VLDAYGLLGVLR;YDLFSDDYDTSEK
0.47481	0.578848	0.46041	0.505732	0.568736	0.526958	-0.0649382	1.57056	14	14	41.878	O43427	FIBP	Acidic fibroblast growth factor intracellular-binding protein	DLDDISTK;DLFVDLVEK;DYAAIVFFANNR;GLVNVAAK;GSLVDNIQQHFLLSDR;LGVFSEMEANFK;LLHAPPK;LLHQLIFQIPPSR;LWLDGYSVTDAVALR;SDHWPLSDVR;SGILEQTGATAAVLQSDTMDHYR;TFHMLER;VLVADKDLLDLHK;YYAFDEAFVR
2.27854	2.29193	2.25206	2.27284	2.30543	2.2859	-0.026083	0.968419	38	33	176.65	O43432	EIF4G3	Eukaryotic translation initiation factor 4 gamma 3	AAIIADSSTFR;AALSEEELER;AALSEEELERK;AQLGSWGK;ASETDALR;DFLPEGEDVHNFLLEQK;DHMGQLLYQLVQSEK;DSQADDPENIKTQELFR;ELEAASAPEER;ELSAEELYK;ELTIEFSKPLLPVGR;EMLETVK;FIGELFK;FSALQPPAPSGSTPSTPVEFDSR;GPDFTPAFADFGR;GVIDLVFEK;ITKPTIDEK;KELSAEELYK;KIITVSVK;KVQQLMTK;LDQPANLLR;LHDELEEAKDK;LLTTIGK;LLTTIGKDLDFEK;LSATESIVEIVK;LTPQMFNQLMK;LVLSGEK;MDQYFNQMEK;QKELEAASAPEER;QLTGGVDVER;QVSGLTVDTEER;RADQGPK;SIIDEFLHINDFK;TIEQI…
1.03837	0.937088	1.02985	1.00278	1.04534	1.04428	0.00514348	0.131914	6	6	19.208	O43447	PPIH	Peptidyl-prolyl cis-trans isomerase H	AVANSSPVNPVVFFDVSIGGQEVGR;DGVPIGYK;GPFADENFK;IELFADVVPK;IIDGLLVMR;KDGVPIGYK
1.03737	1.05971	0.979127	1.04328	0.992776	1.01142	-0.0135848	0.229912	9	9	48.84	O43464;P83110	HTRA2	Serine protease HTRA2, mitochondrial	ACLTSGTPGPR;EPLPTLPLGR;EPSFPDVQHGVLIHK;IQTKEPLPTLPLGR;LLSGDTYEAVVTAVDPVADIATLR;SQYNFIADVVEK;TAPAVVYIEILDR;VILGSPAHR;VTAGISFAIPSDR
3.22437	2.77166	3.06554	2.94858	2.82864	2.97877	0.19084	1.21346	14	14	39.589	O43488;Q8NHP1;O95154	AKR7A2	Aflatoxin B1 aldehyde reductase member 2	ALQAAYGASAPSVTSAALR;ANPWDGK;EHHFEAIALVEK;FFGNSWAETYR;FYAYNPLAGGLLTGK;MDAPASAAAVR;QVETELFPCLR;RMDAPASAAAVR;SLKPDSVR;SQLETSLK;SQLETSLKR;VASVLGTMEMGR;YEDKDGKQPVGR;YKYEDKDGK
-7.03953	-7.29211	-7.11424	-7.0363	-7.05312	-6.97597	-0.040007	0.49543	3	3	97.201	O43490	PROM1	Prominin-1	LRPNIIPVLDEIK;SPAGVNLLSFAYDLEAK;VLPIEQSLSTLYQSVK
3.62726	3.37418	3.51495	3.40925	3.48063	3.48927	0.11712	1.31956	46	41	112.59	O43491	EPB41L2	Band 4.1-like protein 2	AEVGKDER;APHLQLIEGK;DFPGAAGEISAYGPGLVSIAVVQDGDGR;DFPGAAGEISAYGPGLVSIAVVQDGDGRR;DSEGVDIK;DSSQLGTDATK;DYFGLLFQESPEQK;EEAVPEASPVTQAGASVITVETVIQENVGAQK;EEKPSVSK;EISPGSGPGEIR;EPTQAVVEEQVLDKEEPLPEEQR;EQHPDMSVTR;ETELAEEGED;ETQEDKLEGGAAK;EVPIVQTETK;EVQTNELK;EVQTNELKAEK;FIPPWLK;FLTLGSK;FYPPDPSQLTEDITR;GDAEEMAQK;GGISETR;GLSPAQADSQFLENAK;GLSPAQADSQFLENAKR;GQVLFDK;IVITGDGDIDHDQALAQAIR;KDSSQLGTDATK;KEPTQAVVEE…
0.0874691	-0.400703	-0.193944	-0.241533	-0.386552	-0.220608	0.19135	0.856204	11	11	45.879	O43493	TGOLN2	Trans-Golgi network integral membrane protein 2	ADTNQLADK;IIAFVLEGK;KIIAFVLEGK;LSPHAFK;SGADGQTPK;SGAEDQTPK;SGAEEQGPIDGPSK;SGAEEQTSK;SGSEAQTTK;SHPEPQTPK;SSAEAQTPEDTPNK
0.107677	0.0982361	0.211682	0.161165	0.406655	0.187695	-0.181886	0.674206	3	3	9.6138	O43504	LAMTOR5	Ragulator complex protein LAMTOR5	GTLSDEHAGVISVLAQQAAK;HDGITVAVHK;MEATLEQHLEDTMK
-3.99974	-3.81569	-3.97168	-3.83047	-3.87131	-3.91689	-0.100466	1.58956	1	1	47.119	O43505	B4GAT1	Beta-1,4-glucuronyltransferase 1	EMLDQSNQWGGTALVVPAFEIR
-4.16754	-4.13642	-4.16132	-4.14347	-4.06198	-4.09272	-0.0292778	0.273212	3	2	71.276	O43524;P98177;A8MYZ6	FOXO3	Forkhead box protein O3	AALQTAPESADDSPSQLSK;AIESSPDKR;DKGDSNSSAGWK
-2.21849	-2.16387	-2.24407	-2.23544	-2.16528	-2.13646	-0.0449848	0.653037	2	2	49.85	O43556	SGCE	Epsilon-sarcoglycan	GEGILPDGGEYKPPSDSLK;VPLPINDLK
-0.217623	-0.393604	-0.336364	-0.356722	-0.388837	-0.345394	0.0551809	0.498675	5	5	42.813	O43567	RNF13	E3 ubiquitin-protein ligase RNF13	AAIVHNVDSDDLISMGSNDIEVLK;AAIVHNVDSDDLISMGSNDIEVLKK;IDIPSVFIGESSANSLKDEFTYEK;KIDIPSVFIGESSANSLKDEFTYEK;LPAEGLK
-1.26151	-1.24181	-1.25792	-1.2757	-1.19149	-1.1825	-0.0311	0.412447	7	7	73.817	O43572	AKAP10	A-kinase anchor protein 10, mitochondrial	ASISVHSPQK;ESEPEPDVRK;SIEQDAVNTFTK;VFLPGFLSSNLYYK;YFSLQATHPLGFDDVVR;YISPDAAKPIPITEAMR;YLNDLIHSVR
1.77295	1.34388	1.63191	1.46529	1.37054	1.55775	0.218711	1.44506	8	8	22.092	O43583	DENR	Density-regulated protein	AADISESSGADCK;LDADYPLR;LTVENSPK;NFPNEFAK;QEAGISEGQGTAGEEEEK;QEAGISEGQGTAGEEEEKKK;WPEVDDDSIEDLGEVK;WPEVDDDSIEDLGEVKK
1.17663	1.04581	1.07702	1.11204	1.04281	1.1154	0.0361932	0.413259	17	17	109.96	O43592	XPOT	Exportin-T	ALAYFEQLK;ANVEAIMLAVMK;ASALQDMMR;DLQEFIPLINQITAK;GMDPVDK;GVDLYLR;ILMAIDSELVDRDVVHTSEEAR;LAQVSPELLLASVR;LMLAQDEER;LVELWGGK;MDEQALLGLNPNADSDFR;NAQEALQAIETK;NLLTPLMEK;QLTVLSDQQK;QMNPFIEDILNR;VLVTVIQGAVEYPDPIAQK;YSELTTVQQQLIR
1.22168	0.966917	1.09325	1.00416	1.03426	1.02546	0.0978425	0.839766	6	6	19.108	O43598	DNPH1	5-hydroxymethyl-dUMP N-hydrolase	AAAMVPGR;AVAFNKR;FGTVLTEHVAAAELGAR;GEEAAGGDR;VLSAMIR;YFEADPPGQVAASPDPTT
3.31413	3.07697	3.22552	3.07789	3.13675	3.21138	0.114471	1.11661	28	28	51.355	O43615	TIMM44	Mitochondrial import inner membrane translocase subunit TIM44	ALGLQFHSR;ALSQGVESVK;ALSQGVESVKK;DFKENNVVFNR;DQDELNPYAAWR;EGVEEAAK;EIDDSVLGQTGPYR;ENNVVFNR;ESLHEVSK;GEVVEGDPDK;GEVVEGDPDKVLR;GFLSGLLDNVK;IKEGVEEAAK;ILDIDNVDLAMGK;KEIDDSVLGQTGPYR;KGFLSGLLDNVK;KLGELTGTVK;LGELTGTVK;LLDISASSTEQIL;MKYDESDNAFIR;QSAESVSK;RLEESDVLQEAR;TEFAGDK;TEMSEVLTEILR;TIESETVR;VDPAFDKDR;VFEPNEEALGVVLHK;VTDLLGGLFSK
2.07298	1.73299	1.92813	1.77505	1.76349	1.84948	0.179693	1.49579	9	9	20.274	O43617	TRAPPC3	Trafficking protein particle complex subunit 3	DYENDEDVNK;DYENDEDVNKQLDK;ETADVIAK;FVQDTLK;FVQDTLKGDGVTEIR;GALEMVQMAVEAK;GDGVTEIR;LIEDFLAR;RIEDNLPAGEE
1.86592	1.90855	1.88625	1.95295	1.87968	1.87923	-0.0305112	0.530527	11	11	25.104	O43633	CHMP2A	Charged multivesicular body protein 2a	AEAAASALADADADLEER;AMGTMNR;ANIQAVSLK;IMMEFER;KAEAAASALADADADLEER;KIIADIK;KTPEELLR;QGQMDAVR;QKLETQEK;SNNSMAQAMK;TPEELLR
0.310019	0.236334	0.243577	0.241335	0.260209	0.254351	0.0119146	0.191943	11	10	42.915	O43639	NCK2	Cytoplasmic protein NCK2	APIFTSEHGEK;DSESSPSDFSVSLK;EWYYGNVTR;FAYVAEREDELSLVK;GQVGLVPK;GVEGDFLIR;IYDLNIPAFVK;KAPIFTSEHGEK;LWLLDDSK;WDYTAQQDQELDIK;WDYTAQQDQELDIKK
-0.599533	-0.591385	-0.679914	-0.617224	-0.654498	-0.575245	-0.0226669	0.27947	2	2	27.563	O43657	TSPAN6	Tetraspanin-6	AITNNQYEIV;DWTDTNYYSEK
1.31693	1.17601	1.2331	1.25628	1.1884	1.22701	0.0334956	0.395179	16	16	57.193	O43660	PLRG1	Pleiotropic regulator 1	AVVLHPR;GPQNATDSYVHK;GVIVSTR;HSVHTLVFR;HYTFASGSPDNIK;IWDLASGK;LLTAEADK;LRNEYGPVLHMPTSK;LWDLVAGK;MPSESAAQSLAVALPLQTK;QYPANQGQEVEYFVAGTHPYPPGPGVALTADTK;TAPSGSEYR;TGYNFQR;VISGHLGWVR;VTLTNHK;VYREDDTATEETHPVSWKPEIIK
0.841566	0.582132	0.612712	0.588598	0.573419	0.579803	0.122548	0.804657	4	4	50.75	O43670	ZNF207	BUB3-interacting and GLEBS motif-containing protein ZNF207	ETIDAVPNAIPGR;ILIQHQK;LIHPDEDISLEER;LIHPDEDISLEERR
-0.175104	-0.33073	-0.361625	-0.389647	-0.287951	-0.346176	0.0245959	0.114321	6	6	21.75	O43674	NDUFB5	NADH dehydrogenase [ubiquinone] 1 beta subcomplex subunit 5, mitochondrial	ELIDHSPK;GDGPWYYYETIDK;GDGPWYYYETIDKELIDHSPK;NFYDSPEK;TMAVLQIEAEK;TMAVLQIEAEKAELR
1.40576	1.06244	1.25878	1.16182	1.12694	1.22948	0.139465	1.17606	6	6	11.402	O43676	NDUFB3	NADH dehydrogenase [ubiquinone] 1 beta subcomplex subunit 3	GLRDPWGR;IEGTPLETIQK;IEGTPLETIQKK;MELPDYR;SVSFSDVFFK;YMGGFAK
0.0710964	-0.324375	-0.118094	-0.162249	-0.454303	-0.257168	0.242346	1.08504	3	3	8.7341	O43677	NDUFC1	NADH dehydrogenase [ubiquinone] 1 subunit C1, mitochondrial	EPPNAKPDWLK;QHNEDILEYK;QHNEDILEYKR
0.953085	0.934002	0.904801	0.906216	0.972163	0.903118	-0.0188688	0.218847	7	7	10.921	O43678	NDUFA2	NADH dehydrogenase [ubiquinone] 1 alpha subcomplex subunit 2	ALENVLSGK;ALENVLSGKA;ANPDLPILIR;ECSDVQPK;KANPDLPILIR;SPGSQGVR;YAFGQETNVPLNNFSADQVTR
2.54691	2.27676	2.40554	2.34568	2.34006	2.41058	0.0851981	0.73368	12	12	38.792	O43681	GET3	ATPase GET3	AAGVAGWGVEAEEFEDAPDVEPLEPTLSNIIEQR;ESVLIISTDPAHNISDAFDQK;GADKVNTFSALLLEPYKPPSAQ;GMNFSVVVFDTAPTGHTLR;IDTHNIIVNQLVFPDPEKPCK;LEETLPVIR;LIQELAK;LLNFPTIVER;LPLLPHEVR;VNTFSALLLEPYKPPSAQ;WIFVGGK;YLDQMEDLYEDFHIVK
2.2739	2.06767	2.17304	2.17169	2.0789	2.14614	0.0738716	0.778196	14	14	37.154	O43684	BUB3	Mitotic checkpoint protein BUB3	FSPNTSQFLLVSSWDTSVR;LIVGTAGR;LNQPPEDGISSVK;LYDVPANSMR;MHDLNTDQENLVGTHDAPIR;MTGSNEFK;NMGYVQQR;QGYVLSSIEGR;QVTDAETKPK;TGSNEFK;VAVEYLDPSPEVQK;VAVEYLDPSPEVQKK;VLVWDLR;VYTLSVSGDR
6.18812	5.94785	6.06227	6.0153	6.02346	6.05661	0.0743872	0.801277	72	52	104.85	O43707	ACTN4	Alpha-actinin-4	ACLISLGYDVENDR;ACLISLGYDVENDRQGEAEFNR;AETAANR;AGTQIENIDEDFR;AGTQIENIDEDFRDGLK;AIMTYVSSFYHAFSGAQK;ALDFIASK;ASFNHFDK;ASFNHFDKDHGGALGPEEFK;ASIHEAWTDGK;ASIHEAWTDGKEAMLK;CQLEINFNTLQTK;DDPVTNLNNAFEVAEK;DGLAFNALIHR;DHALLEEQSK;DHGGALGPEEFK;DLLLDPAWEK;DYETATLSDIK;EAILAIHK;EGLLLWCQR;ELPPDQAEYCIAR;ETTDTDTADQVIASFK;FAIQDISVEETSAK;GISQEQMQEFR;GYEEWLLNEIR;GYEEWLLNEIRR;HEAFESDLAAHQDR;HRDYETATLSDIK;HRPELIEYDK;HR…
1.43035	1.05481	1.29419	1.16268	1.09307	1.23882	0.177366	1.35916	10	10	24.212	O43708	GSTZ1	Maleylacetoacetate isomerase	DFQALNPMK;FKVDLTPYPTISSINK;FKVDLTPYPTISSINKR;LLPQDPK;LLVLEAFQVSHPCR;QPDTPTELR;QPDTPTELRA;TVPINLIK;VDLTPYPTISSINK;VDLTPYPTISSINKR
-1.6061	-1.52064	-1.62246	-1.56347	-1.55647	-1.63505	-0.0352898	0.60215	4	4	31.88	O43709	BUD23	Probable 18S rRNA (guanine-N(7))-methyltransferase	AVLQLYPENSEQLELITTQATK;ESVFTNER;EVRPDTQYTGR;RPEHGGPPELFYDETEAR
1.54473	1.43317	1.50911	1.50464	1.38938	1.46828	0.0659879	0.846707	23	23	85.852	O43719	HTATSF1	17S U2 SnRNP complex component HTATSF1	APEPTDAR;APEPTDARK;DNQGNLK;DPQTEEFK;DPQTEEFKVK;ESEEGNPVR;ESVELALK;FGIIMRDPQTEEFK;GEYDASK;GLEAADK;GSEEDSPK;GSEEDSPKK;GWEAFLNAPEANR;KLLLFDR;LHVEVAK;LLDEDEIR;MNAQETATGMAFEEPIDEK;QITAQAWDGTTDYQVEETSR;QLDWRPER;RSDSVSASER;SGTNLDGNDEFDEQLR;TAEEPPQEK;TEDGGEFEEGASENNAK
-4.94528	-5.03933	-5.09333	-5.18018	-5.1188	-5.10068	0.10801	1.02661	2	2	64.665	O43734	TRAF3IP2	E3 ubiquitin ligase TRAF3IP2	FIPVLFPNAK;GPLPTLQVVPL
-0.634441	-0.717924	-0.694461	-0.631824	-0.683688	-0.686422	-0.0169309	0.206217	6	3	46.348	O43739;Q99418	CYTH3;CYTH2	Cytohesin-3;Cytohesin-2	ELIDDIER;GIIPLENLSIR;GINEGGDLPEELLR;IPEDDGNDLTHTFFNPDR;LPGEAQK;TVIGDYLGERDEFNIK
-1.39761	-1.57707	-1.64911	-1.63285	-1.45326	-1.46974	-0.00175921	0.0062356	7	5	30.302	O43741	PRKAB2	5-AMP-activated protein kinase subunit beta-2	IMVGSTDDPSVFSLPDSK;KSDFEVFDALK;KYVTTLLYKPI;LPGDKEFVSWQQDLEDSVKPTQQARPTVIR;SEGAGGHAPGK;SHNDFVAILDLPEGEHQYK;YVTTLLYKPI
2.46937	2.20923	2.29427	2.2886	2.18759	2.2953	0.105625	0.75533	23	23	91.35	O43747	AP1G1	AP-1 complex subunit gamma-1	ADCASGIFLAAEK;AVEYNALFK;DLAGEVEK;EEDNTYR;FLLNNDK;GSAMQDLAEVNNFPPQSWQ;IEFTFER;KLVPQLVR;KVPELMEMFLPATK;KVVSIYGSSIDVELQQR;LVPQLVR;NDDDSSEAMNDILAQVATNTETSK;NLIMSGYSPEHDVSGISDPFLQVR;SPDMLAHFR;SSFREEDNTYR;TSNSYLR;TVQTDHNAVQR;VLAINILGR;VLTTAGSYVR;VPELMEMFLPATK;VVSIYGSSIDVELQQR;WHIDTIMR;YVALTSLLK
-0.265053	-0.558702	-0.511453	-0.646124	-0.451137	-0.520939	0.121863	0.565246	6	6	29.176	O43752	STX6	Syntaxin-6	AVNTAQGLFQR;DMKDQMSTSSVQALAER;KFNLDATELSIR;QALLGDSGSQNWSTGTTDK;SMEDPFFVVK;WTELLQDPSTATR
1.19337	1.19182	1.24924	1.19712	1.17347	1.1592	0.00252978	0.0180844	4	4	25.455	O43759	SYNGR1	Synaptogyrin-1	AGGAFDPYTLVR;DNPLNEGTDAAR;MEGGAYGAGK;QPHTILR
1.56538	1.85191	1.64246	1.8777	1.68895	1.59143	-0.151531	0.738309	5	5	24.81	O43760	SYNGR2	Synaptogyrin-2	AGGSFDLR;AGGSFDLRR;DVLVGADSVR;FLTQPQVVAR;MESGAYGAAK
-1.89369	-1.88326	-1.90265	-1.86476	-1.82607	-1.90526	-0.0707601	0.730266	1	1	24.555	O43761	SYNGR3	Synaptogyrin-3	AGAALDPVSFAR
1.56583	0.994581	1.41246	1.08298	1.15632	1.23688	0.31528	2.08996	8	8	34.063	O43765	SGTA	Small glutamine-rich tetratricopeptide repeat-containing protein alpha	ALELDPDNETYK;EMPQDLR;HVEAVAYYK;LKTEGNEQMK;MGLALSSLNK;TPPSEEDSAEAER;TPSASNDDQQE;VENFEAAVHFYGK
-1.65615	-1.43011	-1.71617	-1.56952	-1.61382	-1.52904	-0.100157	1.38935	5	5	41.911	O43766	LIAS	Lipoyl synthase, mitochondrial	AGEFFLK;ANFDQSLR;ELLQNGPDLQDFVSGDLADR;KVQPDVISK;VALSGLDVYAHNVETVPELQSK
1.54714	1.21736	1.34334	1.233	1.34079	1.37617	0.104568	0.61126	10	9	13.389	O43768	ENSA	Alpha-endosulfine	EGILPERAEEAK;NLVTGDHIPTPQDLPQR;QEEENPAEETGEEK;QEEENPAEETGEEKQDTQEK;QLPSAGPDK;SQKQEEENPAEETGEEK;SQKQEEENPAEETGEEKQDTQEK;SSLVTSK;YFDSGDYNMAK;YPSLGQKPGGSDFLMK
1.64642	1.4475	1.50574	1.49015	1.43233	1.49405	0.0843232	0.789438	12	12	32.943	O43772	SLC25A20	Mitochondrial carnitine/acylcarnitine carrier protein	ADQPKPISPLK;EGITGLYR;ELIRDEGVTSLYK;FLNWATPNL;FQTAPPGK;GFNAVMIR;GTVLTLMR;KLYQEFGIR;LYQEFGIR;NIFTPEGK;RVSELSAPR;VSELSAPR
4.24395	3.99329	4.1383	4.0169	4.12014	4.12954	0.0757936	0.630372	30	28	62.942	O43776	NARS1	Asparagine--tRNA ligase, cytoplasmic	ALMTVGK;ALMTVGKEPFPTIYVDSQK;ALMTVGKEPFPTIYVDSQKENER;EAEDSLR;EAEDSLRR;EDGTFYEFGEDIPEAPER;EGIDPTPYYWYTDQR;EGIDPTPYYWYTDQRK;EGSDATGDGTK;EHDVKKEDGTFYEFGEDIPEAPER;EKNLEEAK;EKNLEEAKK;EPFPTIYVDSQK;EPFPTIYVDSQKENER;FLTWILNR;GYYEVTPPTLVQTQVEGGATLFK;IFDSEEILAGYK;IFDSEEILAGYKR;IGALEGYR;KEDGTFYEFGEDIPEAPER;LMTDTINEPILLCR;LTESVDVLMPNVGEIVGGSMR;MNYSDAIVWLK;NDPSLPEPK;NLMFLVLR;SPAGSIVHELNPNFQPPK;VFGWVHR;VLAELYVS…
-0.291395	-0.426702	-0.432076	-0.365513	-0.410131	-0.373861	0.0287514	0.263937	15	13	131.98	O43795	MYO1B	Unconventional myosin-Ib	ALYPSSVGQPFQGAYLEINK;ASHALIK;ASVATLMK;EGSEAASK;EQLLQSNPVLEAFGNAK;GAEVNQVK;GDFLFSSDHLIEMATK;GDPLGGVISNYLLEK;LEASELFK;LEDLATLIQK;LGNIEFKPESR;LKDAIEEK;SGVEVLFNELEIPVEEYSFGR;SLFPEGNPAK;YLGLLENVR
-4.00737	-4.30619	-4.0709	-4.22083	-4.17502	-4.04827	0.132936	1.04409	3	3	34.566	O43808	SLC25A17	Peroxisomal membrane protein PMP34	AIATTVTYPLQTVQSILR;GIIDAFHQIIR;NILYLLHQR
2.03406	1.83798	1.90675	1.84378	1.85153	1.88988	0.091121	0.990181	12	12	26.227	O43809	NUDT21	Cleavage and polyadenylation specificity factor subunit 5	ALFAVPK;DSSVAAR;GVTQFGNK;KLFLVQLQEK;LFLVQLQEK;LMTEILGR;LPGGELNPGEDEVEGLK;LPGGELNPGEDEVEGLKR;SQTGWPR;TINLYPLTNYTFGTK;TVEGVLIVHEHR;YIQQTKPLTLER
1.05436	0.704206	0.916175	0.831366	0.776359	0.882696	0.138884	1.23323	5	5	45.283	O43813	LANCL1	Glutathione S-transferase LANCL1	AFPNPYADYNK;ELLQQMER;IDPHAPNEMLYGR;LTPEFSQR;SLAEGYFDAAGR
1.27654	1.29611	1.23406	1.238	1.30526	1.21722	0.00445366	0.0521448	21	21	86.131	O43815	STRN	Striatin	AELQAQIAFLQGER;ALAFHPIEPVLITASEDHTLK;ALPDSGEDRDTK;AQWEVER;DVDELPSLQPSVGSPSRPSSSR;EALKEFDFLVTSEEGDNESR;EFDFLVTSEEGDNESR;ELGIPASVDLVSSDPSHMVASFSK;GLGPLAEAAAAGDGAAAAGAAR;GPLLGHTDAVWGLAYSAAHQR;GYTSIFNMETQQR;LPEHEINR;LQDMLANLR;LWNTTEVAPALSVFNDTK;MDEQAGPGVFFSNNHPGAGGAK;QYLQEVGYTDTILDVK;SELTDSASVLDNFK;SHFDGIR;STSLDVEPIYTFR;SVIDTSTIVR;VISHPTLPISITAHEDR
0.37443	0.419653	0.400544	0.371178	0.454158	0.443203	-0.0268192	0.399431	8	8	51.84	O43818	RRP9	U3 small nucleolar RNA-interacting protein 2	AFEEDQVAGR;EIQAPASADIR;FSSSGDFLVAGVGQEHR;GKPASGAGAGAGAGK;KPEEEEEEELEETAQEK;LKEDVLEQR;LYLEQLR;QQEEEKAEAR
-1.56773	-1.73952	-1.58307	-1.66228	-1.6572	-1.60592	0.0557874	1.22685	7	7	29.81	O43819	SCO2	Protein SCO2 homolog, mitochondrial	LLGLTGSTK;QAAVGQGDFHLLDHR;QGPAETGGQGQPQGPGLR;QLEAEPGLPPVQPVFITVDPERDDVEAMAR;QVAQASHSYR;SAEQISDSVR;YVQDFHPR
-2.78114	-2.61508	-2.74987	-2.7324	-2.76382	-2.63558	-0.0387068	0.379781	4	4	28.34	O43822	CFAP410	Cilia- and flagella-associated protein 410	ALSEGEEITAAPER;ASELHSVR;ELDAEGLEAVQQTVGSR;IPSLAELFYLK
-0.0591908	-0.0925503	-0.140916	-0.191826	-0.149465	-0.0404797	0.0247161	0.185147	7	7	76.107	O43823	AKAP8	A-kinase anchor protein 8	GGSGGGGEGIQDR;GIGQEHFFK;LAAEQFK;QFQLYEEPDTK;SDPFVPPAASSEPLSTPWNELNYVGGR;SFDDEEIQK;TVEFLQEYIVNR
0.160639	0.363533	0.0722075	0.308699	0.225829	0.129679	-0.129937	0.968407	10	10	56.897	O43824	GTPBP6	Putative GTP-binding protein 6	ALTGDAAIQPR;DQLFATLDVTAHAGTLPSR;DVSHPEAELQK;EATVQEVDVIPEDGAADVR;GHGLQELK;GNFEHLTEK;LAGAQLSWLYK;LQVALAEMPLHR;VDLVPGYSPTEPNVVPVSALR;VIISNSAYGK
-0.257299	-0.431005	-0.378058	-0.398149	-0.458896	-0.465477	0.0694586	0.441616	4	4	46.36	O43826	SLC37A4	Glucose-6-phosphate exchanger SLC37A4	AAQGYGYYR;AGLSNYGNPR;FVSGVLSDQMSAR;NLDPMPSEGKK
2.20803	2.08811	2.13416	2.13243	2.03015	2.1391	0.063872	0.697407	19	19	42.183	O43837	IDH3B	Isocitrate dehydrogenase [NAD] subunit beta, mitochondrial	AAAVPVEFQEHHLSEVQNMASEEK;DMGGYSTTTDFIK;EQTEGEYSSLEHESAR;FAFDYATK;GELASYDMR;HLNLEYHSSMIADAVK;HNNLDLVIIR;HPFAQAVGR;IHTPMEYK;IHTPMEYKGELASYDMR;KLDLFANVVHVK;LDLFANVVHVK;LEQVLSSMK;NIANPTAMLLSASNMLR;SLPGYMTR;SQAEDVR;SQAEDVRVEGSFPVTMLPGDGVGPELMHAVK;SVIGHLQTK;VEGSFPVTMLPGDGVGPELMHAVK
1.02394	0.812853	0.875405	0.836674	0.774556	0.857292	0.102269	0.85954	23	23	131.7	O43847	NRDC	Nardilysin	AFDCPETEYPVK;AFTTTLNLLPYHK;ALNKGDANSEVTVYYQSGTR;ANLVLLSGANEGK;DAIDREVEAVDSEYQLARPSDANR;ETLDTLEK;FFWGNAETLK;FHLISPLIQK;GDANSEVTVYYQSGTR;GSILSFLR;GSLSNAGDPEIVK;IEEFLSSFEEK;KIEEFLSSFEEK;LAHEIEALK;LGADESEEEGR;LLILEYAR;LVAGEHGLIIR;SDLVNWFK;TVFQFDVQR;YIATDFTLK;YNSEVVDKK;YPDENGFDAFLK;YPDENGFDAFLKK
3.74715	3.225	3.59258	3.33679	3.32281	3.337	0.287421	1.88668	27	27	37.106	O43852	CALU	Calumenin	DGDLIATK;DGFVTVDELK;DGFVTVDELKDWIK;DIVVQETMEDIDK;DRVHHEPQLSDK;DWILPSDYDHAEAEAR;EEFTAFLHPEEYDYMK;EEIVDKYDLFVGSQATDFGEALVR;EETKDWILPSDYDHAEAEAR;EQFVEFR;EQFVEFRDK;GHDLNEDGLVSWEEYK;HLVYESDQNK;HLVYESDQNKDGK;IDGDKDGFVTVDELK;IDGDKDGFVTVDELKDWIK;LTKEEIVDK;LTKEEIVDKYDLFVGSQATDFGEALVR;MADKDGDLIATK;MDKEETKDWILPSDYDHAEAEAR;TFDQLTPEESK;TFDQLTPEESKER;VHHEPQLSDK;VHHEPQLSDKVHNDAQSFDYDHDAFLGAEEAK;VHNDAQSFDYDHDAFL…
-1.19976	-1.22648	-1.3287	-1.18586	-1.21703	-1.20974	-0.0856883	0.862862	3	3	53.764	O43854	EDIL3	EGF-like repeat and discoidin I-like domain-containing protein 3	ALFGLQK;GNIDNNTPYANSFTPPIK;SGHIQDYQITASSIFR
-6.77604	-7.34773	-7.19745	-7.40294	-7.22133	-7.24071	0.226049	0.663803	3	1	129.3	O43861	ATP9B	Probable phospholipid-transporting ATPase IIB	GEAHLELNAFR;LLMVHGR;LVYLLTDK
2.31045	1.99214	2.13665	2.03131	2.00821	2.08976	0.155453	1.19617	18	10	58.951	O43865	AHCYL1	S-adenosylhomocysteine hydrolase-like protein 1	AQGEKPLAGAK;EIEDAEK;EIEIAEQDMSALISLR;EKQQTNSK;GIVEESVTGVHR;KMDEYVASLHLPSFDAHLTELTDDQAK;KQIQFADDMQEFTK;KYPNVFK;NGPFKPNYYR;QIQFADDMQEFTK;RAQGEKPLAGAK;SMPDAMPLPGVGEELK;SQVDHVIWPDGK;SQVDHVIWPDGKR;TPELTWER;TTDVMFGGK;VVLLAEGR;YKQDVYLLPK
0.228333	0.196894	0.187686	0.17186	0.206258	0.164217	0.0210629	0.496403	22	14	122.95	O43896	KIF1C	Kinesin-like protein KIF1C	AEIEALAALK;DSVLTWLLK;DVWDTVGEEEGGGAGSGGGSEEGAR;EDGGTVGVFSPK;EHPILGPYVQDLSK;EKEEADLLLEQQR;ELLEQQGIDIK;ENLGGNSR;ETSQDAK;FNHPEQAR;GAEVEDLR;GAGSAQPEPQHFQPK;IIAELNETWEEK;KSDFIPYR;LKEGANINK;LTGILQEVK;LVTEPLVLK;SLTTLGK;TVAATNMNETSSR;VIPLAQDHEDENEEGGEVPWAPPEGSEAAEEAAPSDR;VISALADMQSK;VRPFNAR
-4.44507	-4.74201	-4.55319	-4.50174	-4.79302	-4.52025	0.104896	0.455977	1	1	104.75	O43909	EXTL3	Exostosin-like 3	ESVSEELLQLEAK
-3.57439	-3.28911	-3.27422	-3.26087	-3.20611	-3.52558	-0.100629	0.312698	3	3	50.282	O43913	ORC5	Origin recognition complex subunit 5	EISSSQWEK;ESQVSILQSLFGER;LLLEQILNK
1.22211	0.805582	1.0341	0.938566	0.844113	0.946177	0.178621	1.12125	4	4	12.517	O43920	NDUFS5	NADH dehydrogenase [ubiquinone] iron-sulfur protein 5	FGLNIDR;PFLDIQK;WLTIQSGEQPYK;YTPPPHHIGK
-1.53152	-1.27509	-1.40867	-1.24614	-1.26624	-1.41339	-0.154864	1.14	2	2	17.42	O43924	PDE6D	Retinal rod rhodopsin-sensitive cGMP 3,5-cyclic phosphodiesterase subunit delta	ELNFSSTEQMEK;ILWQGTEDLSVPGVEHEAR
-1.24021	0.113125	-0.878478	-0.0498428	-0.160905	-0.775103	-0.715655	1.34413	4	4	50.377	O43929;CON__Q2YDI2	ORC4	Origin recognition complex subunit 4	AFEHLQQLELIKPMER;LDILELLEK;LLLDNTQIMNALQK;SVQEVLQK
0.477942	0.569384	0.396071	0.517807	0.503491	0.45393	-0.0679398	0.95568	12	12	142.87	O43933	PEX1	Peroxisomal ATPase PEX1	ADISIIK;DISEEDIK;EAFDKLDAHVER;FTDLDLQHVAK;GFLPASLR;IGGLHEVR;NFAELYESFQNPK;QRTGILLYGPPGTGK;RGHDNTGVTDR;VVPLDNIFR;VWIPDDLRK;YPELFANLPIR
0.0812721	-0.137796	0.0153704	-0.100197	-0.0844545	-0.0193157	0.0978642	1.26623	17	16	71.689	O60216	RAD21	Double-strand-break repair protein rad21 homolog;64-kDa C-terminal product	AQLSDYSDIVTTLDLAPPTK;AQLSDYSDIVTTLDLAPPTKK;DVIDEPIIEEPSR;EFENPEVPREDQQQQHQQR;ETGGVEK;FYSFLVLK;GGEADNLDEFLKEFENPEVPR;GGEADNLDEFLKEFENPEVPREDQQQQHQQR;INHLEYEDQYKDDNFGEGNDGGILDDK;IWLAAHWDK;KQQAIELTQEEPYSDIIATPGPR;LFSLPAQPLWNNR;LIVDSVK;LQESVMEASR;MAFRPGVVDLPEENR;QQAIELTQEEPYSDIIATPGPR;TQQMLHGLQR
-3.73941	-4.18573	-3.92938	-4.0356	-4.20203	-4.10363	0.168702	0.565044	2	2	10.998	O60220	TIMM8A	Mitochondrial import inner membrane translocase subunit Tim8 A	FIDTSQFILNR;SKPVFSESLSD
-0.47587	-0.448664	-0.516974	-0.540188	-0.461762	-0.494917	-0.0182832	0.215137	21	20	119.26	O60231	DHX16	Pre-mRNA-splicing factor ATP-dependent RNA helicase DHX16	AAGEQEKLEATNR;ATQLQGDEEPSAPPTSTQAQQK;AVDLVEEESGAPGEEQR;AYEEAQK;DAASQEPK;EFLSEPDLASYSVVMVDEAHER;ELEDPHAK;ELLVLPIYANLPSDMQAR;EQLEGLLER;FPVDIFYTK;FSTFFDDAPVFR;LGNEVGYSIR;LLEDSEESSEETVSR;LRDTDTLDLSGPAR;MAEEDRK;RFPVDIFYTK;SLPVFPFR;TSLGNVVLLLK;VVHADNAR;WVQDELHSVLGLSER;YMTDGMLLR
-1.78978	-0.560705	-0.752488	-0.609377	-0.619241	-0.671547	-0.445889	0.554711	5	5	110.4	O60237	PPP1R12B	Protein phosphatase 1 regulatory subunit 12B	AELEHLGGK;LNSTSDIEEK;LQEAQLELADIK;LYESALTENQK;SQADTTAEK
-3.67322	-3.5015	-3.7827	-3.66937	-3.61363	-3.72723	-0.0688066	0.666046	7	7	160.6	O60244	MED14	Mediator of RNA polymerase II transcription subunit 14	DALVHAR;IDHLSIEK;IIPWIQQLK;LELFPDQATQLK;LLGAPTHILR;LLIDSVHAR;LVEGFYPAPGLK
-2.41419	-2.90888	-2.44747	-2.64277	-2.75821	-2.51768	0.169177	0.9852	5	5	116.07	O60245	PCDH7	Protocadherin-7	DHEDFFTPQQHDK;KDHEDFFTPQQHDK;LFEIDPTSGVVSLVGK;SLHIPLTQDIAGDPSYEISK;YDSVNEK
2.05945	1.90507	1.99766	1.94577	1.91114	1.977	0.0739803	1.24471	14	12	40.925	O60256	PRPSAP2	Phosphoribosyl pyrophosphate synthase-associated protein 2	AGLTHLITMDLHQK;AQSFAER;ASPFLLQYIQEEIPDYR;EIQGFFNIPVDNLR;EKPPITVVGDVGGR;GKDVFIIQTVSK;IFVMATHGLLSSDAPR;LGVEMGK;NAVIVAK;RIEESAIDEVVVTNTIPHEVQK;SIIGVIPYFPYSK;SVAAIHPSLEIPMLIPK;VQIQESVR;VQVYQEPNR
-1.95996	-2.57308	-2.03768	-2.31236	-2.3698	-2.04676	0.177741	0.661582	2	2	7.5217	O60262	GNG7	Guanine nucleotide-binding protein G(I)/G(S)/G(O) subunit gamma-7	KLVEQLR;SATNNIAQAR
2.76523	2.53528	2.61644	2.5619	2.5437	2.61497	0.102836	0.960812	42	28	121.9	O60264	SMARCA5	SWI/SNF-related matrix-associated actin-dependent regulator of chromatin subfamily A member 5	ANRFEYLLK;ANYAVDAYFR;APFHQLR;DDIENIAR;DFNQFIK;DIDILNSAGK;EEQLKIDEAESLNDEELEEKEK;EIQEPDPTYEEK;ENMELEEKEK;ESEITDEDIDGILER;FEDSPSYVK;FITDNTVEER;HGATHVFASK;IAFTEWIEPPKR;IDEAESLNDEELEEKEK;ISYGTNK;IYVGLSK;KANYAVDAYFR;KTAEMNEK;LDGQTPHDER;LDSIVIQQGR;LFELLEK;LGFDKENVYDELR;LLNILMQLR;LLTQGFTNWNK;LLTQGFTNWNKR;LVDQNLNK;MGESSLR;NIPGPHMVLVPK;NPELPNAAQAQK;QPNVQDFQFFPPR;QTELFAHFIQPAAQK;RTEQEEDEELLTESSK;SSAAEPPPPP…
2.63966	2.48748	2.56032	2.46747	2.52583	2.50364	0.0849737	1.21995	35	33	146.2	O60271	SPAG9	C-Jun-amino-terminal kinase-interacting protein 4	AFDFLSEETEASLASR;AGPSAQEPGSQTPLK;AKDDDDSDIPTAQR;ATTPASTANSDVATIPTDTPLKEENEGFVK;AVEQEDELSDVSQGGSK;DGGSVVGASVFYK;DVAGLDTEGSK;ELEEELRK;ENPAMQEK;ERPISLGIFPLPAGDGLLTPDAQK;ETDYPAGEDLSESGQVDK;EVENLILENTQLLETK;EYNALHQR;FFVAVPGQVISPQSSSSGTDLTGDK;FIEFEDSQEQEKK;FQELSQPR;GGETPGSEQWK;GSSTPTK;HIEVQVAQETR;HTEMIHNYMEHLER;IYVVQPK;KPEPPVNLK;LFSSSSNTTK;LKDSILSIVHVK;LYHAHTYQHLQDVDIEPYVSK;MELEDGVVYQEEPGGSGAVMSER;MGDE…
-5.91371	-5.90934	-5.93189	-5.93283	-5.84985	-5.85235	-0.0146605	0.132519	20	4	109.49	O60282	KIF5C	Kinesin heavy chain isoform 5C	ALESALK;ANEQLTDELAQK;DLLDVSK;DVLEGYNGTIFAYGQTSSGK;ELQTLHNLR;ELQTLHNLRK;EVLQALEELAVNYDQK;FVSSPEEVMDVIDEGK;HVAVTNMNEHSSR;IRDLLDVSK;ISFLENNLEQLTK;LLLLNDKR;LYLVDLAGSEK;SLSALGNVISALAEGTK;SQEVEDK;SVELDNDDGGGSAAQK;TGAEGAVLDEAK;THTMEGK;VSYFEIYLDK;YQQEVDR
-4.47033	-4.46248	-4.53875	-4.32414	-4.57612	-4.5325	-0.0192957	0.0848506	6	6	254.39	O60287	URB1	Nucleolar pre-ribosomal-associated protein 1	AEAAGLIGWLK;DVLVLLHK;EDVYDVVEGYIK;EVTFSFIPR;EVTLALLSLPETHLVTQQPTK;LLPPEDTQELIFK
-0.999899	-1.17616	-1.04149	-1.15123	-1.04613	-1.01097	0.0481523	0.476953	4	4	60.752	O60291	MGRN1	E3 ubiquitin-protein ligase MGRN1	APDSTLR;GVSQQFSLPSFK;MGSILSR;YKDDADSPTEDGDKPR
-1.87697	-1.64903	-1.81153	-1.76632	-1.63468	-1.79761	-0.11293	0.991715	7	6	194.61	O60292;Q9P2F8	SIPA1L3	Signal-induced proliferation-associated 1-like protein 3	AGAEQHSAGAIAWR;ASVGSPSSGEGHLAEPALSAYR;GDHIFLQATEGSVEDIR;RPVSFPETPYTVSPAGADR;SKDAPPFGPPIPSGTTFR;VINAENAAHK;VVIIPPFEDGTPR
-1.41941	-1.23749	-1.36187	-1.21046	-1.29575	-1.33639	-0.113096	1.29938	4	4	75.601	O60294	LCMT2	tRNA wybutosine-synthesizing protein 4	AAVWEVDFPDVAR;AFLEQIGAPQAALR;GDTLSHTLVFPSSEAFPR;GYVQDPFAALLVPGAAR
-0.0865517	0.0427971	-0.106309	0.00507164	0.0597448	-0.0655212	-0.112106	1.31251	15	14	171.29	O60306	AQR	RNA helicase aquarius	AAFAHFPELYDFALSNVAEVDTR;AAPAQPK;ASFPGHNVK;AVLETIR;GPYPYNQPK;IFTQLEEFR;KIFTQLEEFR;LGHGEEELETEKDFSR;TLIVEPHVIPNR;TLIVTHSNQALNQLFEK;VGVPTVDLDAQGR;VIEDGPEPRPNLR;VIEDIYEK;VIEDIYEKEIVK;WIMIGDHHQLPPVIK
-5.96242	-6.00761	-6.20977	-6.06472	-6.15854	-6.16982	0.0369142	0.176916	2	1	143.14	O60307	MAST3	Microtubule-associated serine/threonine-protein kinase 3	LQEFLTAYAPGAR;LTDFGLSK
3.59719	3.33614	3.469	3.37387	3.3566	3.45727	0.121222	1.12013	55	55	111.63	O60313	OPA1	Dynamin-like 120 kDa protein, mitochondrial;Dynamin-like 120 kDa protein, form S1	AHQVTTR;AKNEILDEVISLSQVTPK;ALGYFAVVTGK;ALPSSEDLVK;AVEVAWETLQEEFSR;DDKGIHHR;DFFTSGSPEETAFR;DMIPDLSEYK;DTWHQVYR;EAVKEESIK;EAVKEESIKR;EEDLAALR;EFDLTKEEDLAALR;EGCTVSPETISLNVK;EHDDIFDK;EKIDQLQEELLHTQLK;ELDRNELFEK;ESVEQQADSFK;ETIFSISK;EVLEDFAEDGEK;EVLEDFAEDGEKK;EYEEEFFQNSK;FNLETEWK;GFYYYQR;GKEHDDIFDK;GKEHDDIFDKLK;GNSSESIEAIR;GNSSESIEAIREYEEEFFQNSK;GSESDKHFR;GSGEMMTR;GVEVDPSLIK;GVEVDPSLIKDTWHQVYR;HWEEIL…
-0.912941	-0.862997	-0.901158	-0.871908	-0.84389	-0.899794	-0.0323683	0.902557	14	14	218.4	O60318	MCM3AP	Germinal-center associated nuclear protein	DLLGASGLMLLLPPK;DMAIFWHR;DWYDFVWNR;ELVLSELSQGLAVELMER;EVQQFHPAVR;GDHPPDK;GLLDLGHAGR;HIAAEEVSK;ILANWLK;IPGVNKEEETESR;LISDYTVTEIPDTINDLQGSTK;SQLSVFEVVPGTDQVDHAAAVK;STIFPLDGVVR;TILENHFGK
-0.313013	-0.510489	-0.462365	-0.461271	-0.487832	-0.40501	0.0487175	0.398083	9	6	73.259	O60331;O14986	PIP5K1C	Phosphatidylinositol 4-phosphate 5-kinase type-1 gamma	ALVHDGDTVSVHRPSFYAER;ALYSTAMESIQGGAAR;EAEFLQK;GGALLAVKPLGPTAAFSASQIPSEREEAQYDLR;GVDASGETTYK;IMDYSLLLGVHNIDQHER;LLPGYYMNLNQNPR;TYAPVAFR;VVVMNNILPR
-1.52688	-0.417152	-1.13072	-0.613989	-0.660674	-0.978642	-0.55843	1.5744	20	3	204.47	O60333	KIF1B	Kinesin-like protein KIF1B	ADSTGAK;DSVLTWLLR;EDGGTLGVFSPK;EHPLLGPYVEDLSK;EKEEADLLLEQQR;ENLGGNSR;FNHPEQAR;GEENLAGWRPR;HDEAFSTEPLK;IIAELNETWEEK;KTDFIPYR;LKEGANINK;LQEMEILYK;SGLSLEELR;SLTTLGK;TAMVAALSPADINYDETLSTLR;TPNTFAVCTK;TVAATNMNETSSR;VAIVSEK;VRPFNSR
0.708296	0.543011	0.552972	0.532028	0.584794	0.580379	0.0420926	0.325994	19	19	92.902	O60341	KDM1A	Lysine-specific histone demethylase 1A	ASPPGGLAEPPGSAGPQAGPTVVPGSATPMETGIAETPEGR;DITAEFLVK;EASEVKPPR;EKDEMVEQEFNR;ELHQQYK;EYDELAETQGK;EYDELAETQGKLEEK;GIFGSSAVPQPK;GSYSYVAAGSSGNDYDLMAQPITPGPSIPGAPQPIPR;HGLINFGIYK;HWDQDDDFEFTGSHLTVR;IADQFLGAMYTLPR;IKELHQQYK;LFFAGEHTIR;QQPPAVQFVPPLPEWK;TLQLWLDNPK;TQEELKELLNK;VHSYLER;VIIIGSGVSGLAAAR
0.70326	0.443209	0.539096	0.435236	0.518207	0.536722	0.088096	0.583002	10	9	51.964	O60427	FADS1	Acyl-CoA (8-3)-desaturase	APDPVAAETAAQGPTPR;DPDINMHPFFFALGK;ELTDEFR;ILSVELGK;KVYNISEFTR;VISHYAGQDATDPFVAFHINK;VYNISEFTR;WLVIDRK;YFTWDEVAQR;YMNSLLIGELSPEQPSFEPTK
5.48508	5.25152	5.34268	5.21738	5.23779	5.25503	0.142503	1.22061	137	136	204.74	O60437	PPL	Periplakin	AAYEHFHR;AEASAFAESIDVELR;AESEVANLR;AGLIDWNMFVK;AIGPHLAK;AITGILRPPLEQGR;ALEQETR;AQADEVLQLR;AQADEVLQLREELEALRR;AQSLQSAK;ASQEEQIAR;AVQDSAER;DGDKEQNSELR;DGGQEYVVK;DKDLEIDELQK;DKDLEIDELQKR;DMSIQELAVLVSGQK;DTKPQVQTK;DYELEAEK;EAEVLLLQQR;EELEALRR;EEVASLR;EIQALKDTKPQVQTK;EIVRPDPK;EKQEEELSFLQDK;EKVTHTQK;EKVVLSESVQVEK;ELDDLKR;ELDDQEK;ELDEETER;ELDFLREENHK;ELDVEVSR;ELSELIEQLQK;ELSPEEAHR;ETPLKPIPVEALCDFEGEQGLI…
-0.0452538	-0.341619	-0.229239	-0.315523	-0.271501	-0.251694	0.126937	1.01986	7	7	54.554	O60443	GSDME	Gasdermin-E;Gasdermin-E, N-terminal;Gasdermin-E, C-terminal	ALSDDGVSDLEDPTLTPLKDTER;EVDADGDLIAVSNLNDSDK;EVDADGDLIAVSNLNDSDKLQLLSLVTK;KQEVDLQQLIR;LQLLSLVTK;TVQVSATEDGNVTK;VESQSSFGTLR
-1.82391	-1.55367	-1.76865	-1.5064	-1.65384	-1.7147	-0.170528	1.25334	4	4	92.948	O60447	EVI5	Ecotropic viral integration site 5 protein homolog	GLLTQLSEAK;LQEELIAVK;QHIAELEIQK;VIPHQFDGVPDK
0.112646	0.0828533	0.0799799	0.0608292	0.0809355	0.0878925	0.0191002	0.698959	12	11	73.003	O60476	MAN1A2	Mannosyl-oligosaccharide 1,2-alpha-mannosidase IB	AGHYLELGAEIAR;AVQLAEK;AWLMSDK;FDLGLEDVLIPHVDAGK;GGDPEDNDIR;GGDPEDNDIREK;GGLTFIGEWK;HAWDNYR;KMYDDAIEAIEK;RFDLGLEDVLIPHVDAGK;TTPALLPLSGR;TYGWGHNELRPIAR
1.24591	1.19214	1.16123	1.19639	1.2448	1.22385	-0.038716	0.481983	15	14	79.187	O60488	ACSL4	Long-chain-fatty-acid--CoA ligase 4	AKPTSDKPGSPYR;ALLGGNVR;GEIVIGGQNISMGYFK;GYDAPLCNLLLFK;HIIYVDNK;IGYSSPLTLSDQSSK;KLILGNYK;LFDHAVSK;LILGNYK;LKDWQEGGYTINDKPNPR;LSPEPWTPETGLVTDAFK;LTLLAQQK;SDQSYVISFVVPNQK;SVTHFDSLAVIDIPGADTLDK;VQEMNYIQK
2.15964	2.00088	2.1708	2.02208	2.07431	2.16167	0.103425	1.02233	13	11	18.762	O60493	SNX3	Sorting nexin-3	AETVADTR;AETVADTRR;FTTYEIR;GDDGIFDDNFIEER;KQGLEQFINK;LITKPQNLNDAYGPPSNFLEIDVSNPQTVGVGR;LKESTVR;QGLEQFINK;QLPFRGDDGIFDDNFIEER;TNLPIFK;VAGHPLAQNER;VVVPPLPGK;YSDFEWLR
-2.92683	-2.88276	-2.78973	-2.88479	-2.95337	-2.85689	0.0802323	0.563128	2	2	28.114	O60499	STX10	Syntaxin-10	EELDWTTNELR;SPSDLLDASAVSATSR
0.927088	0.648636	0.802716	0.76952	0.703095	0.751747	0.116043	1.30416	22	22	102.91	O60502	OGA	Protein O-GlcNAcase	APVIWDNIHANDYDQK;DEASVYK;DVVILGR;EIPVESIEEVSK;EMYDDGVGLPFQSQPDLIGDK;EMYSVEEAEQLMTLISAAR;ESELSSNPAASAGASLEPPAAPAPGEDNPAGAGGAAVAGAAGGAR;ESQATLEER;EVSTLKR;GGLAGEFQR;ILEFYSK;ISWIPFMQEK;KVTDPSVAK;LENEGSDEDIETDVLYSPQMALK;LFLGPYK;LLPGIEVLWTGPK;LLPIDGANDLFFQPPPLTPTSK;QEETDHKNDNQILSEIVEAK;RAPVIWDNIHANDYDQK;SHSSAQFLIGDQEPWAFR;STELIPR;WELNTYLYAPK
1.09392	0.914955	0.968905	0.915485	0.949239	0.940041	0.0813649	0.941858	15	15	75.34	O60504	SORBS3	Vinexin	AGLSLDDFIPGHLQSHIGSSSR;AMYQYRPQNEDELELR;DFVYPSSTR;ELAELSAELDKDLR;EVDKNWLEGEHHGR;FDFQAQSPK;FGTFPGNYVAPV;GDIVYIHK;GPSHPLDLGTSSPNTSQIHWTPYR;KVNENWYEGR;LKFDFQAQSPK;QGIFPASYVQVSR;SSVDRPR;SWDHSEELPR;YEGIGPVDESGMPIAPR
3.90717	3.54807	3.73922	3.60091	3.63226	3.69858	0.144425	1.02282	35	27	69.602	O60506	SYNCRIP	Heterogeneous nuclear ribonucleoprotein Q	ADGYNQPDSK;AFSQFGK;AGPIWDLR;AMEEMNGKDLEGENIEIVFAKPPDQK;DLEGENIEIVFAKPPDQK;DLFEDELVPLFEK;DSDLSHVQNK;DYAFIHFDER;DYAFIHFDERDGAVK;EAAQEAVK;EFNEDGALAVLQQFK;EFNEDGALAVLQQFKDSDLSHVQNK;EQILEEFSK;GFCFLEYEDHK;KADGYNQPDSK;KADGYNQPDSKR;KYGGPPPDSVYSGQQPSVGTEIFVGK;LDEIYVAGLVAHSDLDER;LFVGSIPK;LKDYAFIHFDER;LKDYAFIHFDERDGAVK;LMMDPLTGLNR;LYNNHEIR;NLANTVTEEILEK;QTNNQNWGSQPIAQQPLQGGDHSGNYGYK;SENQEFYQDTFGQQWK;TGYTLDV…
-2.65818	-2.62516	-2.58091	-2.62581	-2.64426	-2.57351	-0.00894229	0.103789	7	7	65.521	O60508	CDC40	Pre-mRNA-processing factor 17	EMYDYQGR;ENDASNIDGFLGPWAK;FKENDASNIDGFLGPWAK;FVSTSDDK;TFIGHSK;VWEWDIPVDFK;YIGSVEEAEKNQGLTVFETGQK
-2.54551	-2.32908	-2.57004	-2.4452	-2.39858	-2.49042	-0.152041	1.47795	4	4	40.041	O60513	B4GALT4	Beta-1,4-galactosyltransferase 4	EFMANFHK;LIFKPDLTLEEVQAENPK;LLHQVSR;VAILVPHR
-1.98748	-1.58206	-1.92172	-1.66027	-1.76037	-1.87116	-0.189592	1.38629	9	7	124.71	O60518	RANBP6	Ran-binding protein 6	AATASAGVPATVSEK;AIGTEPDTDVLSEIMNSFAK;DFQQYLPLVIEPLIK;EGFVEYTEQVVK;FLIDSIYSK;FYFHDNVR;IISIIAEGK;LLSSGFEEVYPNLPADVQR;LMVPLLK
2.05405	1.87287	1.98531	1.91994	1.90151	1.96562	0.0832513	1.36493	22	22	122.95	O60524	NEMF	Ribosome quality control complex subunit NEMF	AAEPLLTLER;ATLLLESGIR;AVDEFYSK;AVLAELNASLLGMR;DQQQNEIIVK;EAQAQGDPVASAIK;ERYPLDHAR;ESTVHIETHQNTSK;EVQTVTSIQK;FRTDEADDVK;FSTIDLR;IHTTEFEWPK;LLGSAGSNKEEK;LQKPDFK;LTEIVASAPK;LTPGVQK;TVEAAEK;VDEKLETK;VLVSLQK;VNNVYDVDNK;VSAPNLLNVK;YKDQDEEDRELIMK
1.73549	1.5402	1.6346	1.58999	1.57198	1.62761	0.0760492	1.00011	14	14	41.949	O60547	GMDS	GDP-mannose 4,6 dehydratase	EAYNLFAVNGILFNHESPR;EMVHADVELMR;ETTPFYPR;FYQASTSELYGK;GSGDGEMGKPR;GYEVHGIVR;IINEVKPTEIYNLGAQSHVK;ISFDLAEYTADVDGVGTLR;NPQAHIEGNMK;SFLHIGK;TIVWEGK;TIVWEGKNENEVGR;VAFDELVR;VQEIPQK
-0.0822506	-0.26078	-0.272563	-0.244789	-0.27967	-0.246429	0.065815	0.497418	12	9	56.98	O60551	NMT2	Glycylpeptide N-tetradecanoyltransferase 2	EHIIDTFVVESPNGK;ELINTYLK;ELYTLLNENYVEDDDNMFR;GFDVFNALDLMENK;GSPGGYLGAK;KLVGFISAIPANIR;LDEVITSHGAIEPDKDNVR;LVGFISAIPANIR;NIDEAAK;QFHLAPVMDEEEVAHWFLPR;VAPVLIR;YQFWDTQPVPK
-4.22268	-3.80356	-3.94102	-3.9636	-3.78824	-3.9067	-0.138968	0.550277	2	2	80.684	O60563	CCNT1	Cyclin-T1	GPSEETGGAVFDHPAK;MPIEGSENPERPFLEK
1.30558	1.25299	1.22957	1.26119	1.29976	1.26884	-0.00492414	0.0681109	18	18	84.784	O60568	PLOD3	Multifunctional procollagen lysine hydroxylase and glycosyltransferase LH3;Procollagen-lysine,2-oxoglutarate 5-dioxygenase 3;Procollagen glycosyltransferase	AVMNFVVR;GRDPVNPEK;IFQNLNGALDEVVLK;ILIEENRK;KGWALLHPGR;LAGGYENVPTVDIHMK;LLLLDYPPDR;LLVITVATAETEGYLR;LSLNLDHK;LTHYHEGLPTTWGTR;LVGPEEALSPGEAR;QVGYEDQWLQLLR;SEDYVELVQR;TLGLGEEWR;TYVGPMTESLFPGYHTK;VGVWNVPYISQAYVIR;VIAPMLSR;YKDDDDDQLFYTR
-1.78365	-2.14676	-1.87973	-2.031	-2.03755	-1.95785	0.150045	1.49633	8	8	28.362	O60573	EIF4E2	Eukaryotic translation initiation factor 4E type 2	AVVPGPAEHPLQYNYTFWYSR;DKNQSSSK;FQEDIISIWNK;QIGTFASVEQFWR;RTPGRPTSSQSYEQNIK;TASDQATTAR;THTDSIK;VLNLPPNTIMEYK
-5.73222	-5.62376	-5.70202	-5.65854	-5.61178	-5.60522	-0.0891215	2.0182	1	1	97.798	O60602	TLR5	Toll-like receptor 5	WPEDLQDVGWFLHK
1.99111	1.86129	1.90117	1.85314	1.88917	1.88274	0.0534267	0.73497	34	34	141.35	O60610	DIAPH1	Protein diaphanous homolog 1	AEMDEVER;AMDPAVPNMMIDAAK;DAQEQYNK;DVQNFPAATDEKDKFVEK;EIENEDMR;ELEDAKK;ELGEYFLFDPK;EMASLSAAAITVPPSVPSR;EMVSQYLYTSK;FPDELAHVEK;FQPLLDGLK;HELQVEMK;KDQEGGEEK;KLDSELTAR;KLSVEEFFMDLHNFR;KLYKPEVQLR;KMESDFEQK;LGLHQVLQDLR;LHDEKEETAGSYDSR;LNAILFK;LQDLQGEKDALHSEK;LSVEEFFMDLHNFR;LYKPEVQLR;MPYQEIK;QDLEAEVSQLTGEVAK;QMPEPEQLK;RLHDEKEETAGSYDSR;SGTTIALK;SPDELPSAGGDGGK;TMLETEEGILLLVR;VKEDRFENNELFAK;VLEAMTER;VQLNVF…
-0.19784	-0.457117	-0.245879	-0.415272	-0.320233	-0.328461	0.136641	1.8148	3	3	18.092	O60613	SELENOF	Selenoprotein F	GSDPVLK;LLDDNGNIAEELSILK;WNTDSVEEFLSEK
-0.927277	-0.746294	-0.741532	-0.672247	-0.840585	-0.765482	-0.062514	0.353706	3	3	28.017	O60637	TSPAN3	Tetraspanin-3	AIDYVQR;SRDPAYELLITGGTYA;VENEVDR
-1.97162	-1.41729	-1.92502	-1.53362	-1.55445	-1.70398	-0.343673	2.45277	5	2	92.501	O60641	SNAP91	Clathrin coat assembly protein AP180	ATNSSWVVVFK;FIQYLASR;GADGVMR;NTLFNLSNFLDK;SGSHGYDMSTFIR
1.32511	1.20779	1.23262	1.26851	1.22063	1.2374	0.0245711	0.308279	23	23	85.566	O60645	EXOC3	Exocyst complex component 3	AAIQSQLDGVR;DAVVQHSQLAAAVENLK;DDHIGALLAVR;DGLMYEQYR;DIQQSLADVSK;DIVVPSLNVAK;DMTLIHGYFGSTQGLSDELAK;EAVATAVQR;ESIVSLK;ETQDLIEQGALLQAHR;IEGTQADTR;IIEREEK;KYVLDDLIVAK;MTAEAHR;NEVEEGVSPSQPSMDGILDAIAK;NIFSVPEIVR;NLLNMYHQALSTR;QTIMETLEQGPAQASPSYVPLFK;RDPTLLVSVVR;VAGMLQRPDQLDK;YKDEAQLYKEEHLR;YPDIRDDHIGALLAVR;YVLDDLIVAK
2.37998	2.23762	2.30925	2.21482	2.33865	2.30435	0.0588996	0.628636	23	23	47.074	O60664	PLIN3	Perilipin-3	DQVQQAR;DTVATQLSEAVDATR;EPPKPEQVESR;ESYPHIK;GAVQSGVDK;GLDKLEENLPILQQPTEK;IATSLDGFDVASVQQQR;LEENLPILQQPTEK;LEPQIASASEYAHR;LGQMVLSGVDTVLGK;LGSLSER;LHQMWLSWNQK;LVEGQEK;QEQSYFVR;QLQGPEK;QLQGPEKEPPKPEQVESR;QVEDLQATFSSIHSFQDLSSSILAQSR;RQVEDLQATFSSIHSFQDLSSSILAQSR;SADGAEADGSTQVTVEEPVQQPSVVDR;SEEWADNHLPLTDAELAR;SVVTGGVQSVMGSR;TLTAAAVSGAQPILSK;VSGAQEMVSSAK
-0.509501	-0.578238	-0.564656	-0.563164	-0.564218	-0.531239	0.0131753	0.271734	9	9	59.902	O60678	PRMT3	Protein arginine N-methyltransferase 3	ALSAEAALAR;AVIPEAVVEVLDPK;DFIYQNPHIFK;GKIEEVHLPVEK;KAVIPEAVVEVLDPK;LNKLEDTITLIK;QTVFLLEKPFSVK;VLGVDQSEILYQAMDIIR;VVFSTGPQSTK
1.35202	1.41081	1.22118	1.27365	1.38343	1.29714	-0.0486806	0.384678	13	7	60.029	O60684	KPNA6	Importin subunit alpha-7	EAAWAITNATSGGTPEQIR;EMVEMLFSDDSDLQLATTQK;EPSPPIDEVINTPR;FVEFLKR;GKNPPPEFAK;IEFLQSHENQEIYQK;KEAAWAITNATSGGTPEQIR;LGEQEGKR;LLSKEPSPPIDEVINTPR;LVELLMHNDYK;METMASPGK;RLVELLMHNDYK;VASPALR
2.23776	1.98825	2.09548	2.01958	1.97253	2.08952	0.126317	1.08177	19	19	55.023	O60701	UGDH	UDP-glucose 6-dehydrogenase	ASVGFGGSCFQK;EADLVFISVNTPTK;EQIVVDLSHPGVSEDDQVSR;ESSSIYISK;FSLQDPPNK;IAILGFAFK;IFDANTKPNLNLQVLSNPEFLAEGTAIK;IIDSLFNTVTDK;IIDSLFNTVTDKK;ILTTNTWSSELSK;INAWNSPTLPIYEPGLK;LAANAFLAQR;MLKPAFIFDGR;NLFFSTNIDDAIK;RIPYAPSGEIPK;VLIGGDETPEGQR;VTVVDVNESR;YLMDEGAHLHIYDPK;YWQQVIDMNDYQR
2.91203	2.7637	2.78634	2.7808	2.78603	2.79235	0.046065	0.502218	38	38	108.17	O60716	CTNND1	Catenin delta-1	AAALVLQTIWGYK;AASGALR;ALSAIADLLTNEHER;DMDLTEVITGTLWNLSSHDSIK;EIPQAER;EPNEDCKPR;EQEAQFEK;ETQGIEK;FHPEPYGLEDDQR;FVGDADLER;GGPPPPNWR;GIPVLVGLLDHPK;GKKPIEDPANDTVDFPK;GSLASLDSLR;GSLASLDSLRK;GYELLFQPEVVR;HAIPNLVK;HVSAQLER;HYEDGYPGGSDNYGSLSR;IYISLLK;KGGPPPPNWR;KPIEDPANDTVDFPK;KSDFQVNLNNASR;LRETQGIEK;MDDSEVESTASILASVK;MEIVDHALHALTDEVIIPHSGWER;MQEPGQIVETYTEEDPEGAMSVVSVETSDDGTTR;NLAVDAR;NLSYQVHR;QDVYGPQPQV…
-2.75902	-2.19522	-2.46282	-2.20297	-2.36886	-2.57452	-0.248472	0.8304	4	4	31.938	O60725	ICMT	Protein-S-isoprenylcysteine O-methyltransferase	AAMFTAGSNFNHVVQNEK;APPGSEAR;RVPTGLPFIK;VPTGLPFIK
-3.88946	-3.36678	-3.6386	-3.19962	-3.60689	-3.53146	-0.264071	0.79007	6	1	12.823	O60739	EIF1B	Eukaryotic translation initiation factor 1b	GDDLLPAGTEDYIHIR;KTLTTVQGIADDYDK;STIQNLQSFDPFADATK;TLTTVQGIADDYDK;TLTTVQGIADDYDKK;TLTTVQGIADDYDKKK
3.25858	2.88988	3.1314	2.97144	2.97863	3.09578	0.154824	1.21399	24	22	58.47	O60749	SNX2	Sorting nexin-2	AADAVNK;ALSQLAEVEEK;AVNTQALSGAGILR;DFEQISK;EDSSSTEFVEK;ELSANTAAFAK;FSDFLGLHSK;HPTLLQDPDLR;KELSANTAAFAK;MMVANKPDK;MNESDAWFEEK;QFLESSELPR;QQQFENLDQQLR;SAAMLGNSEDHTALSR;SIVGMTK;SMSAPVIFDR;TSLSMFSK;VGDGMNAYMAYR;VGKEDSSSTEFVEK;VQQGERDFEQISK;WEDAQITLLK;YLESLVQTQQQLIK;YLHVGYIVPPAPEK;YWEAFLPEAK
1.11686	0.799564	0.982821	0.880703	0.772002	0.907202	0.181814	1.44389	12	12	29.634	O60762	DPM1	Dolichol-phosphate mannosyltransferase subunit 1	DVAEQLEK;EGNFDIVSGTR;FIPEFIR;GANFLTQILLRPGASDLTGSFR;GLLTLFATT;HATGNYIIIMDADLSHHPK;KLGLGTAYIHGMK;LGGNEIVSFLK;LGLGTAYIHGMK;QLNYTIGEVPISFVDR;SFSESGINYEIIIIDDGSPDGTR;YSVLLPTYNER
3.51278	3.32399	3.45913	3.37819	3.3308	3.44226	0.0928008	1.17827	38	38	107.89	O60763	USO1	General vesicular transport factor p115	ASQKPQPNFPSPEYMIFDHEFTK;DKLELEITDSKK;DLGHPVEEEDELESGDQEDEDDESEDPGKDLDHI;DQYNLLK;DSEQVAELK;DSEQVAELKQELATLK;DSMIENMK;ELEGVITK;EQDDLLVLLADQDQK;EQDLQLEELR;EQLDSSNSTIAILQTEK;EVIRNDGVLLLQALTR;GVMGGQSAGPQHTEAETIQK;IGKENFIEK;IVAFENAFER;KEQDDLLVLLADQDQK;LKQLIEK;LMDLLADSR;LREEIEELK;LREEIEELKR;LSALLQETK;MKPWFEVGDENSGWSAQK;NDGVLLLQALTR;NNNSNQNFFK;NQELLQSQLTEK;NQELLQSQLTEKDSMIENMK;QLGPQVQQIILVSPMGVSR;QQVSTLK…
-2.0715	-2.35526	-2.0637	-2.21131	-2.24859	-2.16536	0.107977	1.24327	3	3	15.139	O60783	MRPS14	Small ribosomal subunit protein uS14m	HLADHGQLSGIQR;ILQDVADEEIAALPR;MAYEYADER
1.81681	1.54361	1.72636	1.48276	1.671	1.62181	0.173412	1.30135	16	16	53.818	O60784	TOM1	Target of Myb1 membrane trafficking protein	AADRLPNLSSPSAEGPPGPPSGPAPR;AGLQSLEASGR;APSEAEPAADLIDMGPDPAATGNLSSQLAGMNLGSSSVR;EVKYEAPQATDGLAGALDAR;GLEFPMTDLDMLSPIHTPQR;GSSLADQR;GVTSEEFDKFLEER;KGLEFPMTDLDMLSPIHTPQR;LEDEFDMFALTR;LPNLSSPSAEGPPGPPSGPAPR;MDFLLGNPFSSPVGQR;NNPPTIVHDK;SELEMVSGNVR;SSPDLTGVVTIYEDLR;SSPDLTGVVTIYEDLRR;YEAPQATDGLAGALDAR
3.57156	3.29265	3.42894	3.35995	3.34448	3.40269	0.102556	0.900975	31	25	58.476	O60825	PFKFB2	6-phosphofructo-2-kinase/fructose-2,6-bisphosphatase 2;6-phosphofructo-2-kinase;Fructose-2,6-bisphosphatase	AQDMQEGAD;AYLTEENGQIAVFDATNTTR;DKPTNNFPK;DMILNFAEQNSFK;ENVMEDFLK;FLEEQEITDLK;GADELPYLR;HDNEEAMK;HGESEFNLLGK;IGGDSGLSVR;IVYYLMNIHVQPR;KFLEEQEITDLK;LEPVIMELER;LNVEAVNTHR;LTPVAYGCK;NRENVMEDFLK;QFAQALR;RYPEEFALR;RYPEEFALRDQEK;SGASSSEQNNNSYETK;TIQTAESLGVPYEQWK;VINVGQR;VQDYIQSK;VSSPDYPER;VTYRPLDPDNYDKDLSFIK;VWTSQLK;VWTSQLKR;YLNWIGVPTK;YPEEFALR;YPEEFALRDQEK;YPGGESYQDLVQR
2.55178	2.46143	2.46044	2.46477	2.42374	2.45635	0.0335751	0.370361	31	30	70.755	O60826	CCDC22	Coiled-coil domain-containing protein 22	AAAEEAR;AIGSQIR;AVELLPDGTANLAK;DLEEQIETELGK;DLEEQIETELGKK;DLGELLQAWGAGAK;DLLLFLAER;DQLALPWVPPHLR;DRPGDEDWVHR;EFQASPLLLPVPTQVPQPVGR;EINSLSGK;FTFHLEPQAQATQVSDVPATSR;ILEIVGNIR;ILIHSLR;LAEIQELHQSVR;LPPQEDTR;LPTDASEDADQPAGDSAILLR;LQHLQGSALQKPFHASR;LQLVVENSAQR;LVVPELSSR;QLMSELETLPR;QLTEHLR;QSWGLLGAPIQAR;RKEEVYK;RPEQVTWAAQEQELESLR;RPEQVTWAAQEQELESLREQLEGVNR;SIEEVEADMK;TFAVTDELVFK;TLSNLEK;VIHLAGQWEK;VINP…
0.908171	0.585016	0.729508	0.581293	0.656915	0.667166	0.144087	0.957439	8	8	30.472	O60828	PQBP1	Polyglutamine-binding protein 1	EELAPYPK;GHDKSDR;GTWSTGLPK;HLEPEPEEEIIAEDYDDDPVDYEATR;KDEELDPMDPSSYSDAPR;REELAPYPK;SSNADAEEKLDR;TGADTTAAGPLFQQRPYPSPGAVLR
-0.378834	-0.42708	-0.450219	-0.457996	-0.47515	-0.422022	0.0578779	0.808161	3	3	18.273	O60830	TIMM17B	Mitochondrial import inner membrane translocase subunit Tim17-B	EDPWNSITSGALTGAVLAAR;GKEDPWNSITSGALTGAVLAAR;YTAQQFR
0.538786	0.607952	0.510505	0.591469	0.612702	0.492533	-0.0772648	0.667107	6	6	19.258	O60831	PRAF2	PRA1 family protein 2	ALDDFVLGSAR;IENKIESIGLK;IESIGLK;IESIGLKR;RTPMGLLLEALGQEQEAGS;TPMGLLLEALGQEQEAGS
2.18322	2.09444	2.09166	2.0792	2.0827	2.10815	0.0261504	0.30273	25	25	57.673	O60832	DKC1	H/ACA ribonucleoprotein complex subunit DKC1	ADAEVIILPK;AGLESGAEPGDGDSDTTK;AGLESGAEPGDGDSDTTKK;ALETLTGALFQRPPLIAAVK;APQVVAEAAK;DSAVNAICYGAK;EIGDYIR;EVELVSE;EVVAEVVK;EYVGIVR;IMLPGVLR;KEVVAEVVK;LDTSQWPLLLK;LHNAIEGGTQLSR;MIEYDPER;MIEYDPERR;QEYVDYSESAK;QEYVDYSESAKK;RVVYPLEK;SLPEEDVAEIQHAEEFLIKPESK;SQQSAGK;TGFINLDKPSNPSSHEVVAWIR;TGHSGTLDPK;VVYPLEK;YEDGIEVNQEIVVITTK
2.90757	2.73162	2.77795	2.76143	2.71328	2.79927	0.0674686	0.631187	40	39	138.83	O60841	EIF5B	Eukaryotic translation initiation factor 5B	ADRETVAVKPTENNEEEFTSK;AETPTAAEDDNEGDKK;AMQEALAK;AQVMEVK;DAQEMADSLGVR;DELIHELK;DPIVMGVTVEAGQVK;DWFRDEMQK;EDEIPVLKDELIHELK;EEERLEQEK;EGDTIIVPGVEGPIVTQIR;EKEELETGK;ELEELSLEAQGIK;ETVAVKPTENNEEEFTSK;GLLLPPPMK;HFEATDILVSK;HKEVEAAQGVK;HTHVQDGEAGGITQQIGATNVPLEAINEQTK;IEPIPGESPK;ILPQYIFNSR;IPGMLIIDTPGHESFSNLR;IPQQLESK;KFEEETVK;KIPQQLESK;KSPDSDVAATLK;LEELEAK;LKEEEER;LKEGDTIIVPGVEGPIVTQIR;LLQAQGVEVPSK;LLQAQ…
-2.12618	-1.60357	-2.20492	-1.63581	-1.74577	-2.13172	-0.374292	1.10677	3	3	46.987	O60858	TRIM13	E3 ubiquitin-protein ligase TRIM13	DVSEPIVFLQQMQEFR;LQHTLDQK;SLQLLTK
-1.35266	-1.31502	-1.40616	-1.37425	-1.30899	-1.45496	-0.036672	0.250562	4	4	54.371	O60861	GAS7	Growth arrest-specific protein 7	IKIEEDYAK;LHSEVEKPLMNFR;LSQNSLASQEEGSLGEAWAQVK;SLADEAEVHLK
1.60261	1.54731	1.52652	1.62225	1.509	1.52287	-0.00428581	0.0318409	14	14	16.368	O60869	EDF1	Endothelial differentiation-related factor 1	AESDWDTVTVLR;AIPNNQVLGK;ETEELHHDR;GEDVETSKK;GPTAAQAK;INEKPQVIADYESGR;KGPTAAQAK;KWAAGQNK;LDRETEELHHDR;QAILAAQR;RGEDVETSK;RGEDVETSKK;VTLEVGK;WAAGQNK
-3.29743	-3.12643	-3.18197	-3.18295	-3.01406	-3.11685	-0.102212	0.68507	4	4	45.373	O60870	KIN	DNA/RNA-binding protein KIN17	GNEGTLESINEK;RVEGIQYEDISK;SALDEIMEIEEEK;TDYWLQPEIIVK
2.57458	2.28934	2.41126	2.24567	2.32122	2.41941	0.134845	0.834992	35	35	125.57	O60879	DIAPH2	Protein diaphanous homolog 2	AANEEETK;EGDETGVMDNLLEALQSGAAFR;EKAEQEK;EKAEQEKLER;EKENDELDIQLK;EKPLIQHPIDSQVAMSEFPAAQPLYDER;ELEAEIQQLR;EMVVQYISATAK;EVLDLFEK;FPEELEHVESASK;IKELEAEIQQLR;ILNELAELK;KFDEEFTAR;KFPQAENQHDK;KFPQAENQHDKFVEK;LALNFATQIK;LLGAITTAAER;LYENLGEYFIFDSK;NAEALEEK;NAQSLGFK;QEAQAELQK;QPNMMTEIVK;QQENIDK;QQENIDKK;SLLLLAR;SLNLSEK;SLNLSEKEVLDLFEK;SNLASMEQQIVHLER;TAQNLSIFLGSYR;TLADDVRDR;TMLPDLK;TVSIEEFFGDLNNFR;VFDENKED…
2.38576	2.39066	2.30983	2.39301	2.33514	2.36149	-0.0139313	0.193538	16	16	45.745	O60884	DNAJA2	DnaJ homolog subfamily A member 2	ANVADTK;DGNDLHMTYK;EHEVFQR;EISFAYEVLSNPEK;EISFAYEVLSNPEKR;EYHPDKNPNAGDK;FDVQFPENNWINPDK;GEDMMHPLK;GEGMPQYR;ILEVHVDK;ITFTGEADQAPGVEPGDIVLLLQEK;LYDILGVPPGASENELK;LYDILGVPPGASENELKK;RGEDMMHPLK;VSLEDLYNGK;YGEQGLR
-1.22948	-1.21965	-1.22826	-1.06085	-1.31891	-1.18032	-0.0385958	0.199	16	12	152.22	O60885;Q58F21	BRD4	Bromodomain-containing protein 4	AASVVQPQPLVVVK;AQAEHAEK;DAQEFGADVR;DVPDSQQHPAPEK;HPMDMSTIK;HQFAWPFQQPVDAVK;INELPTEETEIMIVQAK;KLQDVFEMR;LAELQEQLK;LNLPDYYK;MPDEPEEPVVAVSSPAVPPPTK;SDPYSTGHLR;SREDEDALEQAR;VQPPTPLLPSVK;VVHIIQSR;YNPPDHEVVAMAR
0.0546017	-0.333391	0.083045	-0.442799	0.122363	0.0609531	0.103559	0.215829	3	3	19.116	O60888	CUTA	Protein CutA	GKIEEDSEVLMMIK;SVHPYEVAEVIALPVEQGNFPYLQWVR;TQSSLVPALTDFVR
-1.51629	-1.44389	-1.54119	-1.42177	-1.47527	-1.55931	-0.0514228	0.548515	3	3	47.645	O60906	SMPD2	Sphingomyelin phosphodiesterase 2	AQAELQHVLGR;EAQDLGPEPQPALLLGQQEGDR;EWTGLHDAYLETR
-2.24096	-2.14472	-2.38114	-2.14615	-2.22221	-2.31162	-0.0942828	0.675087	8	2	62.495	O60907	TBL1X	F-box-like/WD repeat-containing protein TBL1X	EGGHDVPSNK;GPIFALK;HQEPVYSVAFSPDGK;IWTEDGNLASTLGQHK;KGNYILSAGVDK;TFQGHTNEVNAIK;TTIIWDAHTGEAK;YLASGSFDK
-2.86853	-3.00753	-3.00735	-2.98557	-3.04146	-2.98364	0.0774708	0.7782	5	3	37.329	O60911	CTSV	Cathepsin L2	EPLFLDLPK;GYVTPVK;KGYVTPVK;MIELHNGEYSQGK;VFREPLFLDLPK
-2.79338	-2.90674	-2.78676	-2.7844	-2.76105	-2.70713	-0.0362307	0.715211	3	3	31.691	O60921	HUS1	Checkpoint protein HUS1	DLQEPVVPDPDVSIYLPVLK;IVTHDIPIK;LLQFLAGQQVNPTK
1.85076	1.46045	1.79661	1.69185	1.61749	1.61121	0.148972	1.50144	8	8	14.21	O60925	PFDN1	Prefoldin subunit 1	AAPVDLELK;AAPVDLELKK;AFTELQAK;EAEDNIR;EAIHSQLLEK;IKELEQK;LADIQIEQLNR;VIDTQQK
-1.35343	-1.12185	-1.25667	-1.15458	-1.10544	-1.19644	-0.122941	1.18747	2	2	13.952	O60927	PPP1R11	E3 ubiquitin-protein ligase PPP1R11	AEAGAGLSETVTETTVTVTTEPENR;KVEWTSDTVDNEHMGR
-1.43755	-1.58957	-1.57343	-1.61641	-1.4816	-1.51889	-0.00456047	0.0224495	4	4	40.529	O60928	KCNJ13	Inward rectifier potassium channel 13	DGHSTLQMDGAQR;GSKGEYQIK;TVPEFPTPLVSK;VIAPLLSQR
-2.24916	-2.33679	-2.37029	-2.41556	-2.29886	-2.35355	0.0376956	0.312207	14	14	84.958	O60934	NBN	Nibrin	DTKPELEIDVK;ELKEDSLWSAK;IPNYQLSPTK;ISQENEIGK;KLLLTEFR;KQPPQIESFYPPLDEPSIGSK;LLLTEFR;LLPAAGPAGGEPYR;LLTGVEYVVGR;LMPSAPVNTTTYVADTESEQADTWDLSERPK;LPHIIGGSDLIAHHAR;SGDGITFGVFGSK;VQKQEEDVNVR;YGTFVNEEK
-3.43383	-2.82004	-3.385	-2.97009	-3.01154	-3.183	-0.357214	2.23113	11	4	71.355	O60941	DTNB	Dystrobrevin beta	AQQNPTLLAELR;EILQEIQR;ELMVQLEELMK;KDELEQR;LAAEAGNVTRPPTDLSFNFDANK;LEHEQASQPTPEK;LPTAVFEGPSFGYTEHSVR;LQYSQDIPSHLADEHALIASYVAR;LRLEHEQASQPTPEK;NDLLVAADSITNTMSSLVK;QLIAELENK
-4.66878	-4.73742	-4.70978	-4.72818	-4.66411	-4.69385	-0.00974274	0.13235	2	2	68.556	O60942	RNGTT	mRNA-capping enzyme;mRNA 5-triphosphate monophosphatase;mRNA guanylyltransferase	WKPPSLNSVDFR;YLIYDIIK
1.5893	1.4401	1.49935	1.49637	1.48551	1.48858	0.0348428	0.462824	18	18	82.64	O75027	ABCB7	Iron-sulfur clusters transporter ABCB7, mitochondrial	ADNDAGNAAIDSLLNYETVK;AGAAFFNEVR;AMLSYVWPK;AMNIVVPFMFK;ENISKEEER;GSIYLAGQNIQDVSLESLR;GSIYLAGQNIQDVSLESLRR;KVAIVGGSGSGK;LAGLHDAILR;LQEEIVNSVK;LSTVVDADEIIVLDQGK;MPHGYDTQVGER;TSIFIAHR;VAIVGGSGSGK;VAQNSIR;VDTQIKDK;VLSGISFEVPAGK;VQNHDNPK
0.0833302	0.170694	0.0500288	0.168043	0.112311	0.0919056	-0.0670624	1.1887	7	2	58.795	O75030;O14948	MITF	Microphthalmia-associated transcription factor	ASVDYIR;DNHNLIER;ELGTLIPK;IKELGTLIPK;IQELEMQAR;KLEHANR;LEDILMDDTLSPVGVTDPLLSSVSPGASK
-0.893692	-0.594751	-0.872968	-0.672865	-0.67917	-0.868216	-0.168249	1.14579	5	3	182.66	O75037	KIF21B	Kinesin-like protein KIF21B	AIAHLFGGIAER;FHFVDLAGSER;LLLDNFLK;LQMELMEYK;MTIVNLEADMER
-2.53671	-2.51955	-2.61199	-2.53148	-2.54191	-2.57837	-0.0389004	0.576295	7	6	120.87	O75044;P0DMP2;P0DJJ0	SRGAP2;SRGAP2B	SLIT-ROBO Rho GTPase-activating protein 2;SLIT-ROBO Rho GTPase-activating protein 2B	ANQQETEQFYFTK;DKEIIAEYDTQVK;FVQVSEDSGR;GLEHPLFPK;HGLQHEGIFR;IENEEVKK;SPDSTANVR
-0.845913	-0.947216	-0.926326	-0.945265	-0.936984	-0.965538	0.0201015	0.151076	12	12	56.149	O75052	NOS1AP	Carboxyl-terminal PDZ ligand of neuronal nitric oxide synthase protein	ASTATAEETDIDAVEVPLPGNDVLEFSR;DQLAAEAAAR;EGGSHTGSK;EWTWDESK;GVTDLDAVGK;IFYVSHDSQDLK;KEWTWDESK;LSLQHTQQNADGQEDGESER;TKYNLVDDGHDLR;VSHPQEPMLTASPR;YNLVDDGHDLR;YVGSLDVPRPNSR
-4.55212	-4.32939	-4.41363	-4.42091	-4.29888	-4.28994	-0.104966	0.667102	5	5	46.432	O75063	FAM20B	Glycosaminoglycan xylosylkinase	ALLILEGGQK;DHVVEGEPYAGYDR;EVYPEETPELGAVMHAMATK;LLSVLATVK;SAMAHDPISPVLSDPHLDAVDQR
-1.40976	-1.38927	-1.44737	-1.45012	-1.45741	-1.42891	-0.022927	0.210752	5	5	77.448	O75069	TMCC2	Transmembrane and coiled-coil domains protein 2	AAIDHLHQK;AGISGFGGGVVEGVK;HWDSLTYLLEHVLLPS;SAQTIAQLHK;SNALYGAPGNLDALLEELR
4.75539	4.6537	4.69352	4.71943	4.67864	4.71612	0.0166918	0.304041	37	37	66.193	O75083	WDR1	WD repeat-containing protein 1	AHDGGIYAISWSPDSTHLLSASGDK;DHLLSVSLSGYINYLDR;DIAWTEDSK;DIAWTEDSKR;DYSGQGVVK;EKFGAVFLWDSGSSVGEITGHNK;FATASADGQIYIYDGK;FGAVFLWDSGSSVGEITGHNK;FSPDGNR;FTIGDHSR;GHTNQVSR;GNNFLYTNGK;GPVTDVAYSHDGAFLAVCDASK;IAVVGEGR;IIGGDPK;IKDIAWTEDSK;IKDIAWTEDSKR;IWDTTQK;IWDTTQKEHLLK;KCFSIDNPGYEPEVVAVHPGGDTVAIGGVDGNVR;KVFASLPQVER;LATGSDDNCAAFFEGPPFK;LHHVSSLAWLDEHTLVTTSHDASVK;LYSILGTTLK;LYSILGTTLKDEGK;MTVDESGQLISCSMDDTVR…
-1.04263	-1.28763	-1.10087	-1.24655	-1.19605	-1.10388	0.110341	1.15253	3	3	167.92	O75093	SLIT1	Slit homolog 1 protein	GLNVAEVQK;LDLSENAIQAIPR;NVTELYLDGNQFTLVPGQLSTFK
-1.39241	-2.02818	-1.36331	-1.59799	-1.82756	-1.48878	0.27891	1.2834	5	5	167.71	O75094	SLIT3	Slit homolog 3 protein	AIPAGAFTQYK;DSYVELASAK;GLMEIPANLPEGIVEIR;LQVLPELLFQSTPK;WLSEWVK
-2.27901	-2.2458	-2.19387	-2.0941	-2.21067	-2.10394	-0.0928135	0.95936	5	2	83.672	O75106	AOC2	Amine oxidase [copper-containing] 2	AAALAHLDR;EELTAVMR;GGEEGLLFGNR;GSPPPAR;LDLDVAGLK
-0.208027	-0.186983	-0.234635	-0.141747	-0.190576	-0.223906	-0.0471687	0.792873	8	6	118.58	O75110	ATP9A	Probable phospholipid-transporting ATPase IIA	GEAHLELNAFR;GPTLTTK;ISYLLTDK;LLMVHGR;LPTAADLLQIR;SYVYAEEPNIDIHNFVGTFTR;TDNIPLQPVR;TVWLGHPEK
1.8982	1.80458	1.86345	1.84249	1.8257	1.87123	0.031587	0.870711	39	35	160.9	O75116	ROCK2	Rho-associated protein kinase 2	ADSEQLAR;AEDYDVVK;DATIASLEETNR;DQLEDLKK;DSDIEQLR;DVKPDNMLLDK;EFINLQSALESER;EKLTQQMIK;ELEEEITLR;ELNEMQAQIAEESQIR;EQEFPVEPVGEK;ETDSIQSR;GAFGEVQLVR;GNDTDVRR;HKQELTEK;IEQETQK;IFQILYANEGESK;IYESIEEAK;KEQEFPVEPVGEK;KNEESQEIQK;KPPAPDPFAR;LAEIMNR;LEGWLSLPVR;LFHVRPVTQTDVYR;LKDEEISAAAIK;MQTQQVNTLK;MSRPPPTGK;NDQWHWDNIR;NLLLLANSTEEQQK;QIQQLESNNR;QKVENLLLEAEK;QLDETNALLR;SIAEEQYSDLEK;SIAEEQYSDLEKEK;SQGGDGFYGR;…
-1.19884	-1.32037	-1.38861	-1.45182	-1.373	-1.32834	0.0355434	0.155172	3	3	45.379	O75121;P55082	MFAP3L	Microfibrillar-associated protein 3-like	LLKEEEDEKER;RIPIITSAK;TDHIIVK
0.138031	0.103521	0.117545	0.110268	0.122041	0.0716991	-0.00238864	0.0241126	26	22	141.06	O75122	CLASP2	CLIP-associating protein 2	AFTDVPSIQIYSSR;AGGDATDSSQTALDNK;AHHAAGQSVR;ASSLPGSLQR;EGGAGAVDEDDFIK;EGLLGLQNLLK;EILSDDKHDWDQR;ELEETLNK;ELSNHNER;ESFPNDLQFNILMR;FDHGAEAIVPTLFNLVPNSAK;FTVDQTQTPSLK;GIHDADAEAR;KEGLLGLQNLLK;KIALYELMK;LLHNHLR;LSAPLAGMGNAK;LTQEESFSVWDEHFK;QTEDVAEVLNR;SLQTYLK;TFQDGATK;VITWTTEPK;VLNTGSDVEEAVADALK;VLTTTALSTVSSGVQR;VLVNSASAQK;YIETLAK
-3.89938	-4.06795	-4.10146	-4.11104	-4.03648	-4.08784	0.0113395	0.0423225	2	2	78.855	O75127	PTCD1	Pentatricopeptide repeat-containing protein 1, mitochondrial	ALLPVLAK;LVEALDLFER
2.62115	2.36989	2.54831	2.4535	2.46476	2.51418	0.0914345	1.32739	18	17	60.13	O75131;Q96A23;Q9UBL6;O95741	CPNE3	Copine-3	DIVQFVPFR;FGVYDIDNK;GSITISAEEIK;GSITISAEEIKDNR;KLDNKDLFGK;LLPPKNPATK;LTRPLVMK;LYGPTNFSPIINHVAR;NNLNPVWRPFK;NSGVISVK;QAIVNASR;QFQNAPK;QTSDGNWLMVHR;SDPYLEFHK;SPLGEVAIR;SSPVEFECINEK;VECYDYDNDGSHDLIGTFQTTMTK;VVLFEMEAR
-5.09443	-5.15861	-5.31009	-5.21064	-5.22246	-5.19487	-0.0348794	0.175171	8	8	181.26	O75140	DEPDC5	GATOR1 complex protein DEPDC5	ADEDEWQLLDGFVR;ALINPFAPSR;DPTHSSAELLELAYHEAAGR;DVTLDLVELTFK;ETISVDQTVTQVFR;LLMILTK;LRPYQDVYVNVVDPK;SVDEFPEINR
0.751129	0.350801	0.369664	0.377562	0.338605	0.374077	0.123859	0.393946	21	20	119.39	O75146	HIP1R	Huntingtin-interacting protein 1-related protein	AANVVASTK;AAQLEGER;AINTQEAPVK;ALELMGQLQDQQALR;ALVDNEQLR;AQEALSHTEQSK;DDRDLQIESLKR;EADLLAAQSLVR;EIGDLWGHLHDR;ESELKLEEK;ETEAALSR;FHEQFHSLR;GAAAEAAGILQDAVSK;GAATQQEFYAK;HPQFPAGLEVTDEVLEK;QLTVTQQSQEEVAR;SQVNALEGELEEQR;TPLQGILQLGQELKPK;VVLHTGK;WTEGLISASK;YGQLVNVYTK
-0.180565	-0.305111	-0.33174	-0.340843	-0.292628	-0.27523	0.0409253	0.352915	14	14	206.94	O75147	OBSL1	Obscurin-like protein 1	AEDGPGASLALR;AGGLPEPTLYWEK;DGEEVVESPALLLQK;DRDGGFVLK;GGQQLAASER;HSPPGPPILAEMFK;IPTAWFR;KYEQIEEGTVR;LILHAVK;LILPEAK;SLDLHFGAPGR;TVANVTVK;VDFPATWYK;VVSGAEAELK
-0.183874	-0.142628	-0.16512	-0.100225	-0.13997	-0.173212	-0.0327708	0.672049	24	21	113.68	O75150	RNF40	E3 ubiquitin-protein ligase BRE1B	AAGDGGSGPPEK;AEVDELR;ALQGSLGGVEK;AQEDISR;AVEAAQLAEDLK;AVEAAQLAEDLKVQLEHVQTR;EGPSLGPPPVASALSR;EKDDANFK;EKESFNLK;GDSEPLSEAAQAHTR;IEFEQNLAANEQAGPINR;ISLEYSELQDK;KEELVPSEEDFQGITPGAQGPSSR;KESELLK;LGGISSTEEMDLK;LLLDMYK;LLREEKDELGEQVLGLK;LQDLATQLQEK;QAEEQIEHLQR;SLPEEVVR;SQVDAQLLTVQK;TEVIQLEDTLAQVR;VQLEHVQTR;VVEASDR
-3.66061	-3.78164	-3.77709	-3.80234	-3.80162	-3.72775	0.0321252	0.259375	2	1	120.77	O75151	PHF2	Lysine-specific demethylase PHF2	HLLEAFK;VASIETGLAAAAAK
-0.766041	-0.783615	-0.855783	-0.824425	-0.820424	-0.852451	0.00742149	0.0843387	11	11	89.13	O75152;P0DQW0;A0A1B0GTU1	ZC3H11A;ZC3H11C	Zinc finger CCCH domain-containing protein 11A;Zinc finger CCCH domain-containing protein 11C	AAVAVVPLVSEDK;ASQLSVQQNK;GQSEEPAGK;KPAVNIK;KVEAPETNIDK;LSVQSNPSPQLR;NLQEGNEVDSQSSIR;TLEEIKLEK;TLEEILLER;VGEIHVK;YVDGLFLPPSK
1.99599	1.87213	1.88923	1.88021	1.88529	1.92026	0.0385145	0.486642	25	25	146.67	O75153	CLUH	Clustered mitochondria protein homolog	AEDAYTSR;ASDAFHFFQSGQAK;AVGSISSTAFDIR;DWNEELQTTR;EGYTIYK;ESSEYLK;EYSFDSR;FLENALAVSTK;FNPDIFSPGVR;GAMAVIDGNVMAINPSEETK;GIIGNDGR;HQLDHVFK;HYILDLLR;LGYEEHIPGQTR;LHYIMGDYAEALSNQQK;QELVDAFVEHR;SALQHEK;SVEGLQEGSVLR;TVVSHPR;VALSHHLVAR;VHSDFTAAATR;VQQGFLK;VTAQSIIPGILER;VVEEPYTVR;YLELLER
-3.16369	-3.21914	-3.31242	-3.14425	-3.23025	-3.27647	-0.061518	0.363926	14	8	135.25	O75155	CAND2	Cullin-associated NEDD8-dissociated protein 2	AVAALLTIPEVGK;AVLLEALGSPSEDVR;EREENVK;EVEMGPFK;FKEREENVK;FLISDQPHPIDPLLK;GQVPLVVK;HTVDDGLDVR;LISLLTAPVYEQAVDGGPGLHK;LLEDKNGEVQNLAVK;LVLVNPSFLLPR;MTSSDKDFR;QEFEKQDELKR;SFIGEFMESLQDPDLNVR
2.18588	2.30378	2.12417	2.26507	2.2521	2.1701	-0.0876122	1.10709	54	54	254.41	O75165	DNAJC13	DnaJ homolog subfamily C member 13	ADLVPYLLK;AELLEFLESQQENMIK;AGFLAFTQLPK;AIIEEGDKEIATK;AQTAELFAK;ATVPLQSNVIEAAPDMK;DNPEAAVHIFEGTHENPELIWNDNSR;DSLLASLLDGVR;EFLIALLEK;EKVDLVLMHWR;ELIVGEIFVR;EMMLEHFK;ENGLEVLQEAFSR;ENINQKPVVLR;EPLEFEQYLNLR;EQSELVAQALK;FGQDHAR;FLATPPNGNFADAVFR;FPDWPIKDPVK;GQGTEFNLTFR;HKEDLQPYK;HLVGLWTADNATATNLLK;IAAHLADFTPR;IFIAQPAWVLR;ILPPGLLAYLESSDLVPEKDADR;IVDGPDPENIILILK;KEPLEFEQYLNLR;KFLENLLEK;KLAVASVTEILK;KPPMMS…
-3.84182	-3.96089	-3.97168	-4.01377	-3.98167	-4.06185	0.0584669	0.348261	5	5	69.699	O75167	PHACTR2	Phosphatase and actin regulator 2	AGTVGTTK;ASASPSTSSTSSRPK;ASIANSDGPTAGSQTPPFK;ELEDKNILQR;QKNEEEEQEAK
-0.25766	-0.0547161	-0.18098	-0.0706749	-0.0331812	-0.221642	-0.113655	0.855114	14	14	104.94	O75170	PPP6R2	Serine/threonine-protein phosphatase 6 regulatory subunit 2	AILTTIGVLEEPLGNAR;ASLEAHR;FDLNTTSHVDK;GPVQTHISEVIR;HIGTSALMDLLLR;ILEAWEANDHTQAAGGMR;IQPFDDDEDEDIWEDSDTR;KTEQVITFLK;LKDFHQLLLNPPK;LVELIHPSQDEDR;QDVLHWLNEEK;SLETPQPAASLPDNTMVTHLFQK;SYAVSSSVLHGIEPR;VGTEGLVDSFSQGLER
1.05618	1.00806	0.96354	0.97369	1.00243	0.98646	0.00465329	0.0481487	15	15	81.871	O75175	CNOT3	CCR4-NOT transcription complex subunit 3	AAGALLNGPPQFSTAPEIK;AAISSGIEDPVPTLHLTER;APEPLSSLK;AQYLAAK;EGFTFEYR;EGLGLAQK;EKYEADLKK;KLIETQMER;KVSEGVEQFEDIWQK;LHNAANANQK;LIETQMER;MLDNDSILVDAIR;STDSEVSQSPAK;VSEGVEQFEDIWQK;YLEDRDLQ
-3.06459	-3.49471	-3.11357	-3.43662	-3.21163	-3.28038	0.180974	1.08132	1	1	42.99	O75177	SS18L1	Calcium-responsive transactivator	GKGEVTQQTIQK
-0.469961	-0.440678	-0.436538	-0.443367	-0.445504	-0.381533	-0.01544	0.22158	13	8	274.25	O75179	ANKRD17	Ankyrin repeat domain-containing protein 17	DTALTIAADK;EFTGAHIDIDK;EKIEELNK;GADVNAPPVPSSR;GAHIDVR;GASIEHR;GASLEEVNDEGYTPLMEAAR;GHLEMVR;ITPENVQIIFDDPLPISYSQPEK;KLEEIEAK;LEALLEAAGIGK;NASILLEELDLEK;NVSDYTPLSLAASGGYVNIIK
-2.3709	-2.20477	-2.35041	-2.38447	-2.17332	-2.27332	-0.0815248	0.594607	5	5	133.06	O75182	SIN3B	Paired amphipathic helix protein Sin3b	FLDHPEIYR;GQEDLLSEFGQFLPEAK;LPVHVEDALTYLDQVK;SFLEILHTYQK;SLLNEIESVYDEHQEQHSEGR
0.23621	0.226051	0.205392	0.209244	0.27741	0.181309	-0.0162481	0.18709	7	6	36.087	O75190;Q8WWF6	DNAJB6	DnaJ homolog subfamily B member 6	APGPWDPLASAAGLK;FKQVAEAYEVLSDAK;HASPEDIKK;QVAEAYEVLSDAK;SISTSTK;VDYYEVLGVQR;VEVEEDGQLK
-0.618347	-0.441124	-0.67538	-0.629179	-0.546445	-0.624022	-0.0653394	0.832705	5	5	58.382	O75191	XYLB	Xylulose kinase	AFHGLAGGTDVPFSEVVK;AGAQQALTSLSPDLR;FNTENHK;LAATPSPGASQVYEALLPQYAK;VAAFPGDVEVR
1.80141	1.24391	1.63581	1.3426	1.40956	1.49898	0.271513	1.70041	9	9	35.509	O75208	COQ9	Ubiquinone biosynthesis protein COQ9, mitochondrial	LVQLGQAEK;LVQLGQAEKR;MLIPYIEHWPR;NLTGLNQR;QQPPNSFSQQHSETQGAEKPDPESSHSPPR;STGEALVQGLMGAAVTLK;VLEEEQK;VNDAMNMGHTAK;YTDQGGEEEEDYESEEQLQHR
1.35176	0.976448	1.18092	1.06898	1.03983	1.14717	0.15294	1.10353	9	9	21.007	O75223	GGCT	Gamma-glutamylcyclotransferase	AIEPNDYTGK;DVTGPDEESFLYFAYGSNLLTER;ENGLPLEYQEK;LDFGNSQGK;LQDFKLDFGNSQGK;SNLNSLDEQEGVK;SYLMTNYESAPPSPQYK;VATQEGK;VSEEIEDIIK
2.01966	1.88635	1.94928	1.93074	1.87337	1.93391	0.0497799	0.624934	5	5	23.563	O75251	NDUFS7	NADH dehydrogenase [ubiquinone] iron-sulfur protein 7, mitochondrial	GEYVVAK;KVYDQMPEPR;LDDLVNWAR;QSDVMIVAGTLTNK;VYDQMPEPR
-0.669361	-0.595919	-0.670346	-0.586353	-0.647237	-0.663832	-0.0442905	0.83711	5	5	59.263	O75298	RTN2	Reticulon-2	IPGTGALASAAAAVSGSK;LSHQITSR;VADLLYWK;VLQAVHR;VVSAATQLR
2.79948	2.5462	2.61906	2.53372	2.5961	2.63192	0.0864461	0.552439	21	21	52.545	O75306	NDUFS2	NADH dehydrogenase [ubiquinone] iron-sulfur protein 2, mitochondrial	APGFAHLAGLDK;ETAHWKPPPWNDVDPPKDTIVK;GEFGVYLVSDGSSRPYR;GHMLADVVAIIGTQDIVFGEVDR;GSGIQWDLR;GSGIQWDLRK;IIAQCLNK;IKAPGFAHLAGLDK;KTQPYDVYDQVEFDVPVGSR;LDELEELLTNNR;LVMELSGEMVR;LYTEGYQVPPGATYTAIEAPK;MFEFYER;MPPGEIK;MPPGEIKVDDAK;NITLNFGPQHPAAHGVLR;QWQPDVEWAQQFGGAVMYPSK;TQPYDVYDQVEFDVPVGSR;TSMESLIHHFK;TYLQALPYFDR;VLFGEITR
-0.612032	-0.804865	-0.659999	-0.811707	-0.726966	-0.76564	0.128199	1.97012	6	6	50.925	O75312	ZPR1	Zinc finger protein ZPR1	AISGLEQDQPAR;ALEDMNR;FTTLEGLLK;GALTTVEGLITR;IPELDFEIPAFSQK;LVQIPHFK
1.8108	1.68948	1.68453	1.69648	1.66792	1.68896	0.0395819	0.37484	10	8	33.742	O75323	NIPSNAP2	Protein NipSnap homolog 2	DAHSNLLAK;EFLEFRK;ENKEFLEFR;ETSNLYK;HGWEELVYYTVPLIQEMESR;KDAHSNLLAK;KETSNLYK;LQFHNVKPECLEAYNK;SGPNIYELR;YEGGYPALTEVMNK
1.39306	0.787804	1.23963	1.00716	1.00505	1.11671	0.241666	1.67133	9	9	21.868	O75340	PDCD6	Programmed cell death protein 6	AGVNFSEFTGVWK;DNSGMIDKNELK;LSDQFHDILIR;QALSGFGYR;SGVISDTELQQALSNGTWTPFNPVTVR;SIISMFDR;SIISMFDRENK;TYDRDNSGMIDKNELK;YITDWQNVFR
3.27498	2.86524	3.11942	2.90414	3.02005	3.10686	0.156075	0.909839	13	13	12.855	O75347	TBCA	Tubulin-specific chaperone A	AEDGENYDIK;AEDGENYDIKK;DLEEAEEYK;EKVMYEK;ILENEKDLEEAEEYK;ILENEKDLEEAEEYKEAR;KQAEILQESR;LEAAYLDLQR;LVLDSVK;LVLDSVKLEA;QAEILQESR;QQEEKIEK;RLEAAYLDLQR
1.74742	1.29454	1.53592	1.45125	1.33065	1.45819	0.179857	0.953817	7	7	13.757	O75348;O95670	ATP6V1G1	V-type proton ATPase subunit G 1	ASQSQGIQQLLQAEK;ASQSQGIQQLLQAEKR;EAAALGSR;EEAQAEIEQYR;GSCSTEVEKETQEK;MTILQTYFR;QAKEEAQAEIEQYR
1.64482	1.52542	1.54946	1.56264	1.48464	1.5293	0.0482337	0.493745	18	12	49.301	O75351	VPS4B	Vacuolar protein sorting-associated protein 4B	AIDLASK;AVATEANNSTFFSISSSDLVSK;EALKEAVILPIK;EAVILPIK;FPHLFTGK;FTEDFGQEG;GILLFGPPGTGK;IYIPLPEPHAR;KTDGYSGADISIIVR;LHLGTTQNSLTEADFR;LLEPVVSMSDMLR;SENESEAAR;SLSNTKPTVNEHDLLK;SSTSPNLQK;VQSATHFK;WLGESEK;WSDVAGLEGAK;YEAQGDK
0.905273	1.46634	1.07024	1.43409	1.30994	1.15401	-0.306021	1.50358	4	4	26.638	O75352	MPDU1	Mannose-P-dolichol utilization defect 1 protein	AAEADGPLK;AAEADGPLKR;GLGLGIVAGSLLVK;LLVPILLPEK
-5.60253	-4.94592	-5.24091	-5.08896	-5.09088	-5.20714	-0.216489	0.734772	2	1	59.105	O75355	ENTPD3	Ectonucleoside triphosphate diphosphohydrolase 3	GSGISSYGNNPQDVPR
-2.25273	-2.14645	-2.28413	-2.20341	-2.19575	-2.18747	-0.0522525	1.06771	3	3	47.517	O75356;REV__Q5VUR7;REV__Q5TYW2;REV__Q5SQ80;REV__Q5CZ79;REV__Q4UJ75;REV__Q8N2N9;REV__Q5JPF3;REV__A6QL64	ENTPD5	Nucleoside diphosphate phosphatase ENTPD5	ALLFEVK;AVDTDMIDYEK;LHQPEEVQR
-0.635067	-1.12758	-0.851956	-0.890997	-1.03104	-0.863319	0.160011	0.875727	5	5	19.535	O75365	PTP4A3	Protein tyrosine phosphatase type IVA 3	DGITVVDWPFDDGAPPPGK;QLTYLEK;VVEDWLSLVK;YEDAIQFIR;YGATTVVR
3.08914	3.01314	2.99465	3.01171	3.00754	3.04467	-0.00064532	0.00579598	17	15	39.183	O75367	MACROH2A1	Core histone macro-H2A.1	AASADSTTEGTPADGFTVLSTK;AGVIFPVGR;AISSYFVSTMSSSIK;EFVEAVLELR;EFVEAVLELRK;GGKEFVEAVLELR;GKLEAIITPPPAK;GVTIASGGVLPNIHPELLAK;HILLAVANDEELNQLLK;LEAIITPPPAK;LEAIITPPPAKK;LQVVQADIASIDSDAVVHPTNTDFYIGGEVGNTLEK;NCLALADDKK;NGPLEVAGAAVSAGHGLPAK;QTAAQLILK;SIAFPSIGSGR;SLFLGQK
4.20132	3.65428	4.07419	3.86064	3.84549	4.01197	0.201035	1.31653	13	13	12.774	O75368	SH3BGRL	Adapter SH3BGRL	DIAANEENR;DIAANEENRK;EAEVQAK;ENNAVYAFLGLTAPPGSK;ENVPENSRPATGYPLPPQIFNESQYR;GDYDAFFEAR;IGFEEKDIAANEENR;IGFEEKDIAANEENRK;KKQQDVLGFLEANK;KQQDVLGFLEANK;QQDVLGFLEANK;VYIASSSGSTAIK;VYIASSSGSTAIKK
6.02787	5.83883	5.91658	5.8994	5.88656	5.95371	0.0425154	0.438677	139	120	278.16	O75369	FLNB	Filamin-B	AAGSGELGVTMK;ADIEMPFDPSK;AEGPGLSK;AEISCIDNK;AEITFDDHK;AEVSIQNNK;AGGPGLER;AGLAPLEVR;AGPGTLSVTIEGPSK;AGVENGKPTHFTVYTK;AHGPGLEGGLVGKPAEFTIDTK;AHIANPSGASTECFVTDNADGTYQVEYTPFEK;AIVDGNLK;AIVHDNK;AIVHDNKDGTYAVTYIPDK;ANEPTHFTVDCTEAGEGDVSVGIK;APLNVQFNSPLPGDAVK;APSVATVGSICDLNLK;ASSDASK;ATQTGDASK;AWGPGLHGGIVGR;AYGPGLEK;DAGEGLLAVQITDQEGKPK;DAGKAPLK;DAGYGGISLAVEGPSK;DEPCLLK;DFLDGVYAFEYYPSTPGR;DGTCTVTYLPTLPGDY…
-3.68244	-3.72643	-3.71547	-3.73356	-3.61795	-3.67732	-0.0183506	0.202321	6	4	270.21	O75376	NCOR1	Nuclear receptor corepressor 1	GHVIYEGK;GKPYDGITTIK;GMPPLEIVPENIK;GSITQGTPALPQTGIPTEALVK;SGHILSYDNIK;SIHEIPR
-2.0831	-1.9689	-2.03908	-1.80022	-1.50225	-1.4483	-0.322682	0.783304	3	3	16.397	O75379	VAMP4	Vesicle-associated membrane protein 4	GERLDELQDK;HVQNQVDEVIDVMQENITK;LDELQDKSESLSDNATAFSNR
2.16906	1.78293	1.97049	1.79212	1.8143	1.85296	0.210498	1.3685	8	8	13.711	O75380	NDUFS6	NADH dehydrogenase [ubiquinone] iron-sulfur protein 6, mitochondrial	EVNENFAIDLIAEQPVSEVETR;QKEVNENFAIDLIAEQPVSEVETR;VIACDGGGGALGHPK;VSPTGEK;VTHTGQVYDDKDYR;VTHTGQVYDDKDYRR;VYINLDK;VYINLDKETK
1.48383	1.24845	1.36858	1.29622	1.25696	1.31763	0.105269	1.01652	12	12	41.236	O75381	PEX14	Peroxisomal membrane protein PEX14	ASSEQAEQPSQPSSTPGSENVLPR;ATTSTNWILESQNINELK;EGHSPEGSTVTYHLLGPQEEGEGVVDVK;EPLIATAVK;GGDGQINEQVEK;IPSWQIPVK;IQELAHELAAAK;RGGDGQINEQVEK;RPEGASNESERD;SEINSLK;SPSPSSPAAVNHHSSSDISPVSNESTSSSPGK;YLLPLILGGR
-0.537399	-0.60306	-0.551204	-0.565626	-0.633718	-0.496113	0.0191332	0.182387	11	9	80.829	O75382	TRIM3	Tripartite motif-containing protein 3	AEITGPDGTR;DVVEQHK;EKGEFTNLQGVSAASSGR;GEFTNLQGVSAASSGR;LGSAPEVLLVR;LPVPVVDHK;NGHIIVVDNK;QALVGQPASLTVTTK;RKDNPIEDELVFR;VLQSQLDTLR;WVSIFSPEGK
-3.47711	-3.19519	-3.50072	-3.29663	-3.31472	-3.37272	-0.170741	2.56252	2	2	49.642	O75386	TULP3	Tubby-related protein 3	APVWNSDTQSYVLNFR;GLVGAAHTR
3.91619	3.60715	3.78988	3.69942	3.64282	3.75053	0.133659	1.19335	19	19	51.712	O75390	CS	Citrate synthase, mitochondrial	ALGFPLERPK;AYAQGISR;DILADLIPK;DVSDEKLR;DVSDEKLRDYIWNTLNSGR;DYIWNTLNSGR;EGSGIGAIDSNLDWSHNFTNMLGYTDHQFTELTR;EVGKDVSDEK;EVGKDVSDEKLR;GFSIPECQK;GLVYETSVLDPDEGIR;HLPNDPMFK;IVPNVLLEQGK;LPCVAAK;LRDYIWNTLNSGR;LVAQLYK;SMSTEGLMK;VVPGYGHAVLR;YWELIYEDSMDLIAK
0.658579	0.378016	0.363318	0.351336	0.327388	0.392941	0.106717	0.465205	11	11	26.034	O75391	SPAG7	Sperm-associated antigen 7	ADLLGSILSSMEKPPSLGDQETR;ADLLGSILSSMEKPPSLGDQETRR;DKYSHLIGK;EFAPSDEELDSYR;EVSDFIQDSGQIK;EVSDFIQDSGQIKK;KLQEQEK;QEEEAAQQGPVVVSPASDYK;QEEEAAQQGPVVVSPASDYKDK;SIEEAMNEIR;YSHLIGK
-2.22777	-2.64777	-2.45726	-2.59976	-2.55829	-2.49949	0.15277	0.761807	2	2	7.6191	O75394	MRPL33	Large ribosomal subunit protein bL33m	EKLTLLHYDPVVK;LTLLHYDPVVK
2.41949	2.22405	2.31054	2.23702	2.26652	2.26954	0.072588	0.688376	13	13	24.74	O75396	SEC22B	Vesicle-trafficking protein SEC22b	ANNLSSLSK;DLQQYQSQAK;GEALSALDSK;IMVANIEEVLQR;KLAFAYLEDLHSEFDEQHGK;KLNEQSPTR;KLYIDSR;LAFAYLEDLHSEFDEQHGK;LAFAYLEDLHSEFDEQHGKK;LNEQSPTR;NLGSINTELQDVQR;VADGLPLAASMQEDEQSGR;VLLTMIAR
2.40146	2.05406	2.18865	2.15316	2.1489	2.22952	0.0799255	0.447568	27	24	108.8	O75400	PRPF40A	Pre-mRNA-processing factor 40 homolog A	AEQMFGEMEVWNAISER;ALEKEEEEEK;ALEKEEEEEKQK;ELEDLEGYQNTIVAGSLITK;EPAFEDITLESER;FLENHEK;FTNMLGQPGSTALDLFK;FVKEPAFEDITLESER;FYVEDLK;IIKDILK;KAEQMFGEMEVWNAISER;KEEEESQPAK;KQAFNAYK;LAFNSLLEK;QAAPPIELDAVWEDIR;QAAPPIELDAVWEDIRER;QAFNAYK;QETVADFTPK;QSTWEKPDDLKTPAEQLLSK;RVPSNASWEQAMK;SDSGKPYYYNSQTK;SMWTEHK;SNLHAMIK;STTLDAGNIK;TLLEQLDDDQ;TPAEQLLSK;VQTEKEEKEEAR
2.06531	1.88881	1.98632	1.91659	1.91639	1.95197	0.0699622	0.864104	26	23	87.793	O75410	TACC1	Transforming acidic coiled-coil-containing protein 1	AESAALHAGLR;AIGGEFSDTNAAVEGTPLPK;AKAESAALHAGLR;ANEEIAQVR;ASYHFSPEELDENTSPLLGDAR;DEGAVISQISDISNR;DGHATDEEK;DSTDISAVLGTK;EIEANEWK;EIEANEWKK;EQALADLNSVER;ETPGTLSSDTNDSGVELGEESR;GGAAGEDEAGGPEGDPEEEDSQAETK;GVLEGFK;GVLEGFKK;IVAEYEK;KIVAEYEK;LDKANEEIAQVR;MEEDGSTVLGLLESSAEK;NQEIEELTK;SAGLEQPTDPVAR;SFQQLTMEK;SLSDLFR;SQESQEADEQLVAEVVEK;TAVLTLIR;TIAQMIEDEQR
-2.08253	-2.10635	-2.12147	-2.13181	-2.11935	-2.13049	0.00686582	0.113875	5	5	21.142	O75414	NME6	Nucleoside diphosphate kinase 6	AYILAHK;EIAAFFPDFSEQR;GSFGLTDTR;HVAPDSIR;LVEFMASGPIR
-2.48454	-2.3541	-2.44833	-2.3108	-2.29446	-2.39715	-0.119915	1.54614	3	3	114.6	O75420	GIGYF1	GRB10-interacting GYF protein 1	AAETLNFGPEWLR;EVESPYDVHDYIR;RQEEEELFR
-3.81794	-3.31129	-3.7313	-3.37469	-3.50304	-3.59196	-0.270744	1.75908	6	6	73.449	O75427	LRCH4	Leucine-rich repeat and calponin homology domain-containing protein 4	AAAVAAPLAAGGEEAAATTSVPGSPGLPGR;ALEEAVATGTLNLSNR;LGALPPDIGTLGSLR;NQLSTLPEELGDLPLVR;REEPAGEER;SVPFIHVPSPAVPK
0.309776	0.47365	0.233573	0.387842	0.408267	0.297215	-0.107382	1.17007	6	6	29.763	O75431	MTX2	Metaxin-2	AKGHSLSDGLEEVQK;ANAEYMSPSGK;GHSLSDGLEEVQK;LGTQPYFFNK;RIEQHYFEDR;YGSPYPWPLNHILAYQK
2.75265	2.44813	2.61166	2.53245	2.48007	2.58452	0.127853	1.0888	20	18	38.169	O75436	VPS26A	Vacuolar protein sorting-associated protein 26A	EITGIGPSTTTETETIAK;ELALPGELTQSR;EYDLIVHQLATYPDVNNSIK;FESPESQASAEQPEM;GESIPIR;HYLFYDGESVSGK;IEFVGQIELFNDK;IQHMELQLIK;IYFLLVR;KEITGIGPSTTTETETIAK;LEHQGIR;LFLAGYDPTPTMR;QQEIILWR;RLTDLVK;SNTHEFVNLVK;SYDFEFMQVEKPYESYIGANVR;TEDGKVEK;YEIMDGAPVK;YEIMDGAPVKGESIPIR;YFLNLVLVDEEDRR
-0.536621	-1.05628	-0.721658	-0.889874	-0.994573	-0.835825	0.238012	1.36895	2	2	6.9611	O75438	NDUFB1	NADH dehydrogenase [ubiquinone] 1 beta subcomplex subunit 1	ELQPSEEVTWK;VNLLQIVR
1.85762	1.7494	1.78314	1.79261	1.75644	1.78266	0.029548	0.461989	14	13	54.366	O75439	PMPCB	Mitochondrial-processing peptidase subunit beta	AVEILADIIQNSTLGEAEIER;AVEILADIIQNSTLGEAEIERER;DLVDYITTHYK;EQTVYYAK;FTGSEIR;IDAVNAETIR;IPIPELEAR;IVLAAAGGVSHDELLDLAK;KDLVDYITTHYK;RIPIPELEAR;SFGGGMNLSSK;SPAIAAVGPIK;STQAATQVVLNVPETR;TILGPTENIK
-1.14003	-1.0998	-1.1068	-1.14955	-1.12856	-1.15045	0.0100454	0.263512	9	9	110.3	O75448	MED24	Mediator of RNA polymerase II transcription subunit 24	AEPTVTNILK;ALLHIAK;EHAPQQK;EVLTDIFAK;LEEASSWTAIEHSLLK;LGEILANLSNPQLR;QLAGPLFSENTLQFYNER;SLDLLLAAAAATGK;SPEGLLGVLGHMLSGK
-2.98263	-1.93697	-2.34874	-2.22077	-2.09268	-2.22369	-0.332322	0.613274	10	9	55.964	O75449	KATNA1	Katanin p60 ATPase-containing subunit A1	AAQHDLPASEGEVWSMPVPVER;GREELLR;GTSEEHEASR;GTSEEHEASRR;GVLMVGPPGTGK;IYIPLPSAK;RGTSEEHEASR;SLLMISENVK;SSAQNVHNDR;WDDIADLVEAK
3.07206	2.72662	2.96268	2.77549	2.83299	2.9274	0.144001	1.10633	22	21	60.103	O75475	PSIP1	PC4 and SFRS1-interacting protein	ASNEDVTK;AVDITTPK;DFKPGDLIFAK;DIFPYSENK;DIFPYSENKEK;ETSMDSR;ETSMDSRLQR;FSSQQAATK;GFNEGLWEIDNNPK;GRPAATEVK;GYPHWPAR;HTEMITTLK;IDNLDVNR;KDEEGQKEEDKPR;KGFNEGLWEIDNNPK;KQEEQMETEQQNKDEGK;LPIFFFGTHETAFLGPK;QHEEANK;QSNASSDVEVEEKETSVSKEDTDHEEK;QVETEEAGVVTTATASVNLK;VDEVPDGAVKPPTNK;VSQVIMEK
1.815	1.67714	1.71581	1.64581	1.75988	1.73816	0.026158	0.19513	19	13	39.171	O75477	ERLIN1	Erlin-1	ADAEYYAAHK;AKADAEYYAAHK;AVIEAEK;DLNLMAPGLTIQAVR;EAETERK;EALEPSGENVIQNK;ESSLPSKEALEPSGENVIQNK;GGALLTSPSGPGYHIMLPFITTFR;IPEAIRR;ISEIEDAAFLAR;LLIAAQK;LTPEYLELK;LTPEYLELKK;NFELMEAEK;SVQTTLQTDEVK;VMEKETEK;VMEKETEKR;VVEKEAETER;YQAIASNSK
2.84354	2.55433	2.66552	2.56957	2.61977	2.63588	0.10339	0.672813	18	18	30.241	O75489	NDUFS3	NADH dehydrogenase [ubiquinone] iron-sulfur protein 3, mitochondrial	AANWYER;DFPLSGYVELR;DHTNAQFK;EIWDMFGVFFANHPDLR;ESAGADTRPTVRPR;FDLNSPWEAFPVYR;ILTDYGFEGHPFR;ILTDYGFEGHPFRK;KDFPLSGYVELR;KFDLNSPWEAFPVYR;LEAGDKKPDAK;QLSAFGEYVAEILPK;QPPESLK;SLVDLTAVDVPTR;TYTDELTPIESAVSVFK;VVAEPVELAQEFR;VVAEPVELAQEFRK;YDDEVKR
0.568205	0.191952	0.348605	0.212221	0.24487	0.236259	0.180492	1.06845	13	13	31.3	O75494;Q8WXF0	SRSF10	Serine/arginine-rich splicing factor 10	DAEDALHNLDR;DAEDALHNLDRK;GFAYVQFEDVR;GFAYVQFEDVRDAEDALHNLDR;GFAYVQFEDVRDAEDALHNLDRK;KTPNQMK;NVADDTR;NVADDTRSEDLR;NVYSSSR;QIEIQFAQGDR;QIEIQFAQGDRK;YGPIVDVYVPLDFYTR;YLRPPNTSLFVR
-0.813326	-1.0798	-0.973834	-1.03235	-1.02846	-0.982468	0.0993519	0.863165	5	5	41.496	O75503	CLN5	Bis(monoacylglycero)phosphate synthase CLN5;Bis(monoacylglycero)phosphate synthase CLN5, secreted form	IMHDAIGFR;ITYEEIPLPIR;LAEFGAEFK;LQAPVWEFK;YGDLLGHLK
2.02774	1.73789	1.90051	1.80056	1.81293	1.8723	0.107453	0.982601	15	15	43.585	O75521	ECI2	Enoyl-CoA delta isomerase 2	AKNNAVLLR;AKWDAWNALGSLPK;ATEMLIFGK;ATFHTPFSHLGQSPEGCSSYTFPK;DFENSMNQVK;IMFNRPK;KLTAGEACAQGLVTEVFPDSTFQK;KSTGFETLVVTSEDGITK;LPPNALR;NAINTEMYHEIMR;NNAVLLR;QNYVDLVSSLSPSLESSSQVEPGTDR;QNYVDLVSSLSPSLESSSQVEPGTDRK;STGFETLVVTSEDGITK;WDAWNALGSLPK
-6.57682	-6.50127	-6.81036	-6.55464	-6.65854	-6.83585	-0.0547266	0.181055	2	2	50.197	O75530	EED	Polycomb protein EED	IHFPDFSTR;WLGDLILSK
1.44741	0.655777	1.33595	0.801968	1.22611	1.25029	0.223256	0.597451	4	4	10.058	O75531	BANF1	Barrier-to-autointegration factor;Barrier-to-autointegration factor, N-terminally processed	DFVAEPMGEKPVGSLAGIGEVLGK;HRDFVAEPMGEKPVGSLAGIGEVLGK;KDEDLFR;KDEDLFREWLK
3.87712	3.69526	3.77422	3.71114	3.72811	3.76356	0.0787379	1.03304	55	55	145.83	O75533	SF3B1	Splicing factor 3B subunit 1	AAGLATMISTMRPDIDNMDEYVR;AALDEAQGVGLDSTGYYDQEIYGGSDSR;AIGPHDVLATLLNNLK;AIGYLIPLMDAEYANYYTR;AIVNVIGMHK;AKGSETPGATPGSK;ATVNTFGYIAK;DTPGHGSGWAETPR;DYIYAVTPLLEDALMDR;DYIYAVTPLLEDALMDRDLVHR;EFQSPDEEMKK;EIISNLAK;EVMLILIR;GAEYVSAR;GDTPGHATPGHGGATSSAR;GGDSIGETPTPGASK;GKGLAAFLK;GLAAFLK;GSETPGATPGSK;IADREDEYKK;IMGNLGAADIDHK;IVDDLKDEAEQYR;IVDDLKDEAEQYRK;IWDPTPSHTPAGAATPGR;IYNDDKNTYIR;IYNSIYIGSQDALIAHYPR;KAAL…
2.87833	2.67311	2.77372	2.73831	2.68746	2.77297	0.0885671	1.05737	36	36	88.884	O75534	CSDE1	Cold shock domain-containing protein E1	ATNIEVLSNTFQFTNEAR;AVAAPRPDR;DGFGFIK;DQFGFINYEVGDSK;DQFGFINYEVGDSKK;DVEGSTSPQIGDK;DVEGSTSPQIGDKVEFSISDK;EAFGFIER;EATFSNPK;EIFFHYSEFK;ELPFGDKDTK;EMGVIAAMR;ETGVIEK;EVATDVR;FLGTVEK;FNISTDRR;GDLETLQPGDDVEFTIK;GDLETLQPGDDVEFTIKDR;GEVYPFGIVGMANK;GPDNSMGFGAER;GTVSFHSHSDHR;HTGAVSAR;IKQEILPEER;IKVDFVIPK;INFVIDNNK;LLGYVATLK;LLPQGTVIFEDISIEHFEGTVTK;LLTSYGFIQCSER;NITLDDASAPR;NQNDPLPGR;SKVTLLEGDHVR;SVDPTQTEYQ…
-1.65088	-1.69097	-1.76571	-1.83653	-1.72289	-1.73958	0.0237974	0.149286	2	2	42.506	O75554	WBP4	WW domain-binding protein 4	AYQEDLKR;TVTSLGVMADGVAPVFK
-1.93015	-2.07195	-2.05814	-1.99387	-2.069	-2.00884	0.00551383	0.0375476	3	3	41.216	O75563	SKAP2	Src kinase-associated phosphoprotein 2	GAIGLVPK;GEFAIDGYSVR;SIYLQEFQDK
0.969494	1.07571	0.879266	0.961891	1.00756	0.954729	-0.0525608	0.783678	8	8	34.404	O75569	PRKRA	Interferon-inducible double-stranded RNA-dependent protein kinase activator A	AAEAAINILK;LESFMETGK;LPEYTLSQEGGPAHK;MITAKPGK;NQLNPIGSLQELAIHHGWR;SDVQIHVPTFTFR;TPIQVLHEYGMK;VTVGDITCTGEGTSK
-3.42419	-3.69749	-3.62361	-3.67081	-3.66403	-3.6308	0.109296	0.80388	4	3	89.864	O75582	RPS6KA5	Ribosomal protein S6 kinase alpha-5	DLIQGLLTVDPNKR;IIDFGFAR;INWDDLAAK;VGIENFELLK
-0.904947	-0.960077	-0.930179	-1.00218	-1.0094	-0.964483	0.0637913	1.54762	16	16	513.63	O75592	MYCBP2	E3 ubiquitin-protein ligase MYCBP2	ALLSSPEGEEK;ALSVVSTVVR;DLLDPIKELYEDVRR;FPLLVAHMEK;GEDGESTK;GHYQLLLSGR;GIPIGMLVLGNK;GPLVFAGPIFMNHR;GQIPQILYYR;GSTPTQISEIIIK;GTTITGTAGTTVGK;HIIGLVPASISEPPPFK;LASIIGVK;LEYEGLHK;NAIAETIIALTK;WVELPITK
-1.92136	-2.04027	-2.04003	-2.01961	-2.03907	-1.99739	0.00863075	0.0643078	3	3	45.285	O75600	GCAT	2-amino-3-ketobutyrate coenzyme A ligase, mitochondrial	ALGGASGGYTTGPGPLVSLLR;GTDELLGVMDQVTIINSTLGK;HLDMADLEAK
-4.50538	-4.59967	-4.35742	-4.50566	-4.56571	-4.4585	0.112351	0.831089	3	3	19.343	O75607	NPM3	Nucleoplasmin-3	AAGTAAALAFLSQESR;AGGVGGLR;NHDHQEIAVPVANLK
0.750393	0.470758	0.70366	0.599016	0.588269	0.633448	0.102736	1.78146	4	4	24.669	O75608	LYPLA1	Acyl-protein thioesterase 1	ALIDQEVK;ASFPQGPIGGANR;QAAENIK;TLVNPANVTFK
-3.8641	-3.95616	-3.83895	-3.87915	-3.92469	-3.85062	0.0342754	0.684295	5	5	48.349	O75616	ERAL1	GTPase Era, mitochondrial	EIFMLSALSQEDVK;ETQVILLDTPGIISPGK;IGWPHFK;LLEHLPQEVPYNVQQK;VVLLGAPNAGK
0.150015	0.0646915	-0.0637636	0.0675163	0.0608873	-0.052124	-0.0347239	0.143465	2	2	24.074	O75629	CREG1	Protein CREG1	FVTHVSDWGALATISTLEAVR;LPPLPPREDAAR
3.97866	3.86965	3.86091	3.87273	3.82974	3.87421	0.0516733	0.607819	85	84	244.5	O75643	SNRNP200	U5 small nuclear ribonucleoprotein 200 kDa helicase	AALETDENLLLCAPTGAGK;ADEVLEILK;AGRPQYDTK;AIFEIVLNR;ANSNLVLQADR;DEDRHDINK;DEPTGEVLSLVGK;DIDAFWLQR;DILCGAADEVLAVLK;DLIPYLEK;DLLPYGFAIHHAGMTR;DTLGLFLR;EEEKLELQK;EEEVTGPVIAPLFPQK;EEGWWVVIGDAK;EGSASTEVLR;EIDLLLGQTDDTR;ESIEEPSAK;ETLLNGVGYLHEGLSPMER;FLYQLHETEKEDLIR;FLYQLHETEKEDLIREER;FNDPHVK;FQIMNEIVYEK;FYDDAIVSQK;GDPLLDQR;GLIEIISNAAEYENIPIR;GNIIISTPEK;GPVLEALVAR;GTQVYSPEK;GVESVFDIMEMEDEER;GWAQLTDK;GYTLL…
-1.76257	-1.59001	-1.85291	-1.63036	-1.62825	-1.75882	-0.13093	1.2152	6	6	47.744	O75648	TRMU	Mitochondrial tRNA-specific 2-thiouridylase 1	EPWYVVEK;IAAENRLHHVLQK;LHHVLQK;TDHPALYR;TIFPLGGLTK;VHWIAEEPPAALVR
1.2452	1.13323	1.14792	1.15659	1.08503	1.15793	0.0544834	0.64702	11	11	31.444	O75663	TIPRL	TIP41-like protein	EVIKPYDWTYTTDYK;GTLLGESLK;IDGVLIR;IDPNPADSQK;IQHGSGFGIEFNATDALR;LADELHMPSLPEMMFGDNVLR;LYHEADK;LYHEADKTYMLR;MMIHGFQSSHR;TEGEHSK;VVPTTDHIDTEK
0.662735	0.582218	0.605733	0.589764	0.53328	0.593069	0.0575244	1.04472	8	8	52.988	O75674	TOM1L1	TOM1-like protein 1	DPYATSVGHLIEK;EATNTTSEPSAPSQDLLDLSPSPR;EVYLDLVK;LHSELDMVK;NSTVTLVPEQIGK;QETAQISSNPPTSVPTAPALSSVIAPK;TWSQGFPGGVDVSEVK;YNLPLDIQNR
-2.69522	-2.81561	-2.77388	-2.81577	-2.78099	-2.88045	0.0719417	0.797915	5	4	85.605	O75676	RPS6KA4	Ribosomal protein S6 kinase alpha-4	AGGHDAGK;EFLTEEKER;GGELLEHIR;IIDFGFAR;VYGGEIVLALEHLHK
-0.0559807	-0.115973	-0.169553	-0.140366	-0.1718	-0.111782	0.0326309	0.365367	9	9	41.45	O75683	SURF6	Surfeit locus protein 6	AQELEAK;DAYLQSLAK;EEAAWASSSAGNPADGLATEPESVFALDVLR;ELSPAALEK;EPPGLIFNK;GNLTPLTGR;ILPQDLER;LLQEALK;VEVSEDEPASK
1.54346	1.14399	1.43297	1.25222	1.1821	1.33759	0.215095	1.70039	15	13	52.642	O75688	PPM1B	Protein phosphatase 1B	ALGDYDYK;DSELDKHLESR;ESDGASDEAEESGSQGK;GPTEQLVSPEPEVYEILR;HIYFINCGDSR;ILSAENIPNLPPGGGLAGK;IQNAGGSVMIQR;NVIEAVYSR;SGEEGMPDLAHVMR;SGSALELSVENVK;SGSTAVGVMISPK;VEEIMEK;VSDEAVK;VSDEAVKK;YGLSSMQGWR
-0.363873	-0.223459	-0.337827	-0.254333	-0.271888	-0.293348	-0.0650997	1.61269	18	18	318.38	O75691	UTP20	Small subunit processome component 20 homolog	ADLFPILMR;ALEFVTNPDIAAK;ELNLTEHFGK;ELNSTYSEQDPLLK;ELSPLFLR;FINNEYYPADLQVAPTQDLR;FLDQSLGEQVVK;ILNHFDVQLPESMEDDGLSER;KLLVPEIDEVMR;LGNVNIDIIHR;LGSESQYSPTPLLK;LGTVLPVIEK;NLSQEIIELLK;VPLAFAMVK;VVNDEEVVR;VYYEHLEK;YFPLLAK;YITDVVK
2.26277	2.17938	2.18332	2.18839	2.21209	2.22583	0.00349553	0.0431917	30	30	155.2	O75694	NUP155	Nuclear pore complex protein Nup155	AAPQSPSVPK;AGIFQPHVR;ANELLQR;DHIPITDSPVVVQQHMLPPK;DPQGLGLHFYK;ELQEQLK;ELSDSVTLSSSDR;ESLKEYQK;FHEAQLSEK;FYEGVVELSLTAAEK;GLQEFLDR;GVIQVYDLGQDGQGMSR;HGEPEEDIVGLQAFQER;HLLVSNVGGDGEEIER;IITPLNK;ISLQAIQQLVR;KDPQGLGLHFYK;KFHEAQLSEK;LADMHSTEISLQQR;LLEVYDQLFK;LLQVASPFLEPHLVR;LPPGFSASSTVEKPSK;LRPVDQLR;LYGEFADPFK;MHALSLK;NSQFAGGPLGNPNTTAK;SSTAISSIAADGEFLHELEEK;SYQALALWK;VASVSQNAIVSAAGNIAR;YGGEAQMR
-0.201653	-0.389893	-0.364326	-0.345732	-0.42641	-0.350508	0.0782038	0.637915	7	7	39.641	O75695	RP2	Protein XRP2	APDFLPLLNK;DYMFSGLKDETVGR;ESRPENEEERPK;GFFLVQTK;KLIDEMVGK;MFVSESK;VSTEANR
-1.3524	-1.19537	-1.3847	-1.46872	-1.42531	-1.30114	0.0679913	0.460586	4	4	34.656	O75716	STK16	Serine/threonine-protein kinase 16	GDSVALAVQNQLSIPQSPR;GLEAIHAK;HEAWLLLPFFK;LFNHPNILR
2.75091	2.49676	2.68652	2.58918	2.55105	2.61922	0.118978	1.7718	15	15	46.561	O75718	CRTAP	Cartilage-associated protein	AIAAAHTFLLK;AYNGENWR;DELMPLESAYR;ELYDFAK;EVLADFQR;FLQFAYFK;HPDDEMMK;HPDDEMMKR;LFGGLLR;SFPRDELMPLESAYR;SLPGAEDYIK;SLPGAEDYIKDLETK;SYESLFIR;TSITDMELALPDFFK;VMQQNLVYYQYHR
2.20542	1.95617	2.03349	1.93145	1.99786	2.04188	0.0976194	0.66048	25	20	74.761	O75746	SLC25A12	Electrogenic aspartate/glutamate antiporter SLC25A12, mitochondrial	DLGIFGLYK;DVEVTKEEFAQSAIR;EEGPSAFWK;FGLYLPK;FKSPSVAVVQPK;GSGSVVGELMYK;HLNYTEFTQFLQELQLEHAR;IADLPPANPDHIGGYR;IAPLAEGALPYNLAELQR;ILREEGPSAFWK;IYSTLAGTR;KDVEVTKEEFAQSAIR;KIYSTLAGTR;LATATFAGIENK;LHFGHNR;LQVAGEITTGPR;LTLADIER;LTVNDFVR;NIFLQYASTEVDGER;RGDPHELR;SPSVAVVQPK;SSPQFGVTLVTYELLQR;YEGFFGLYR;YLGLYNDPNSNPK;YMTPEDFVQR
2.05849	1.695	1.95013	1.8304	1.84743	1.83657	0.140561	1.58449	22	21	42.075	O75781	PALM	Paralemmin-1	ADEVTLSEAGSTAGAAETR;APAPSPAK;APAPSPAKEER;EENQAGPEATTSDPQDLDMK;EENQAGPEATTSDPQDLDMKK;EIEVLER;ENAAAPSPVR;GAVEGAAR;GDSAPATAK;KTEVVMNSQQTPVGTPK;LEKEIEVLER;LLEDSVSR;LQAIAEK;MEVLAAETTSQQER;QAEIENK;QLEDERR;QPLPLGIK;VLSSTTLLPR;VSNTPLR;VYEDETK;WLLEGTPSSASEGDEDLR;WLLEGTPSSASEGDEDLRR
-0.755249	-1.02477	-0.847878	-0.925594	-0.963668	-0.913546	0.107941	1.28299	7	7	39.008	O75787	ATP6AP2	Renin receptor;Renin receptor N-terminal fragment;Renin receptor C-terminal fragment	ANSVFEDLSVTLR;DHSPDLYSLELAGLDEIGKR;EDLSWPGLAVGNLFHRPR;ILVDALQK;LFQENSVLSSLPLNSLSR;NPASPYNLAYK;SFDTSLIR
-2.77481	-2.87563	-2.93726	-2.90516	-2.89752	-2.91381	0.0225083	0.155072	5	5	33.395	O75792	RNASEH2A	Ribonuclease H2 subunit A	EHVEPVFGFPQFVR;GLESATSL;LADLEALK;LQDLDTDYGSGYPNDPK;LQQSFPGIEVTVK
-1.36193	-1.61107	-1.41185	-1.47116	-1.53439	-1.44732	0.1049	1.57354	2	2	15.651	O75817	POP7	Ribonuclease P protein subunit p20	GAVEAELDPVEYTLR;RPNDIYVNMK
-1.58442	-1.05155	-1.49819	-1.296	-1.15267	-1.27028	-0.279707	2.14577	1	1	41.833	O75818	RPP40	Ribonuclease P protein subunit p40	LILSLDKDTYEETGLQGHPSQFSGR
2.6794	2.39518	2.5137	2.46637	2.41477	2.51771	0.115779	0.93072	22	22	35.611	O75821	EIF3G	Eukaryotic translation initiation factor 3 subunit G	ADDNATIR;DKTTGQSK;DTLGPMQK;EKLPGELEPVQATQNK;ELAEQLGLSTGEK;ELAEQLGLSTGEKEK;ELAEQLGLSTGEKEKLPGELEPVQATQNK;ETDLQELFRPFGSISR;EVINGNIK;GDHWTTR;GFAFISFHR;GIPLATGDTSPEPELLPGAPLPPPK;IDEDGKK;KFGNSEFDPPGPNVATTTVSDDVSMTFITSK;LPGELEPVQATQNK;RADDNATIR;RGESMQPNR;RGESMQPNRR;TVTEYKIDEDGKK;VTNLSEDTR;VTNLSEDTRETDLQELFRPFGSISR;YVPPSLR
2.64856	2.48367	2.5474	2.51049	2.4874	2.54456	0.0731513	0.972265	14	14	29.062	O75822	EIF3J	Eukaryotic translation initiation factor 3 subunit J	AAAAAAAGDSDSWDADAFSVEDPVR;AAAAAAAGDSDSWDADAFSVEDPVRK;DDFTEFGK;DKITQYEK;ETFGVNNAVYGIDAMNPSSR;GVVPGGGLK;KGVVPGGGLK;KLQEESDLELAK;LEEPEEPK;LQEESDLELAK;RLEEPEEPK;RLEEPEEPKVLTPEEQLADK;VLTPEEQLADK;VLTPEEQLADKLR
0.36371	-0.236425	0.0462446	-0.0898762	-0.157811	-0.0211315	0.245277	1.035	10	7	30.85	O75828	CBR3	Carbonyl reductase [NADPH] 3	ALRDFLR;EGWPNSPYGVSK;EYGGLNVLVNNAAVAFK;FHQLDIDDLQSIR;FHSETLTEGDLVDLMK;GIGLAIAR;GQAAVQQLQAEGLSPR;LGVTVLSR;TVEEGAETPVYLALLPPDATEPQGQLVHDK;VALVTGANR
2.09982	1.6583	1.93695	1.76726	1.77174	1.91191	0.17292	1.11943	13	13	24.428	O75832	PSMD10	26S proteasome non-ATPase regulatory subunit 10	ASTNIQDTEGNTPLHLACDEERVEEAK;DHYEATAMHR;EEKTPLQVAK;ESILADK;GGLGLILK;GGLGLILKR;HEIAVMLLEGGANPDAK;LEELKESILADK;LLVSQGASIYIENK;LLVSQGASIYIENKEEK;NRHEIAVMLLEGGANPDAK;NRHEIAVMLLEGGANPDAKDHYEATAMHR;TPLQVAK
1.80899	1.67083	1.671	1.68055	1.68851	1.67951	0.0227489	0.162262	18	18	87.116	O75843	AP1G2	AP-1 complex subunit gamma-like 2	AILTAVHMIR;AVEYDTLFR;DDAVANLTQLIGGAQELHAYSVR;DGDPVHR;DGPQADEEAKESK;DLAPEVEK;ETDASLSR;FLLNSDR;GGLPITQLFR;GYALTALMK;LLLQPSPYVR;LLYVHMLGYPAHFGQMECLKLIASSR;LQDLIEEIR;LVQSDHSAVQR;NHEESSETMNDLLAQVATNTDTSR;SLQLQLQAPSGNTVPAR;VVPQLVHILR;YVALTSLLR
1.78565	1.4988	1.60926	1.53415	1.51168	1.6039	0.115822	0.81067	13	13	54.812	O75844	ZMPSTE24	CAAX prenyl protease 1 homolog	AKDLYSALIK;DIQEDSGMEPR;DLYSALIK;GMWASLDALWEMPAEK;LKEEIEVMAK;NEEEGNSEEIK;NEEVLAVLGHELGHWK;RFEFQADAFAK;SIDFPLTK;SSHSNAYFYGFFK;TTTHVPPELGQIMDSETFEK;VYVVEGSK;VYVVEGSKR
4.72123	4.55805	4.62993	4.58502	4.60406	4.65493	0.0444654	0.522173	27	26	46.659	O75874	IDH1	Isocitrate dehydrogenase [NADP] cytoplasmic	AKLDNNK;ATDFVVPGPGK;DAAEAIK;DAAEAIKK;DATNDQVTK;DIFQEIYDK;DLAACIK;EKLIFPYVELDLHSYDLGIENR;FKDIFQEIYDK;GLPNVQR;GQETSTNPIASIFAWTR;GWPLYLSTK;HAYGDQYR;IIWELIK;ISGGSVVEMQGDEMTR;KISGGSVVEMQGDEMTR;LIDDMVAQAMK;LIFPYVELDLHSYDLGIENR;LVSGWVKPIIIGR;NILGGTVFR;SDYLNTFEFMDK;SEGGFIWACK;SIEDFAHSSFQMALSK;SQFEAQK;TVEAEAAHGTVTR;VEITYTPSDGTQK;VTYLVHNFEEGGGVAMGMYNQDK
-1.0549	-0.873255	-1.08914	-0.969398	-0.922757	-1.01158	-0.113903	1.75716	9	9	61.863	O75879	GATB	Glutamyl-tRNA(Gln) amidotransferase subunit B, mitochondrial	ETLPELPSVTR;QIQLEQDSGK;QVFEELWK;RCVEAAVMTGLALNCHINK;SLHDNLR;SQTLIDLNR;TISSSAAK;TPGQIVSEK;VDANISVHHPGEPLGVR
0.828978	0.865202	0.738519	0.850668	0.773061	0.753386	-0.0302518	0.268511	6	6	33.814	O75880	SCO1	Protein SCO1 homolog, mitochondrial	EAIANYVK;EEVDQVAR;GPGDSTRPSKPGPVSWK;HIGKPLLGGPFSLTTHTGER;LVGLTGTR;LVGLTGTREEVDQVAR
-1.86313	-1.97944	-1.98128	-1.95078	-1.99423	-1.95048	0.0244656	0.231661	7	7	58.255	O75881	CYP7B1	Cytochrome P450 7B1	AFSISQLQK;AGEVSAATGR;FISELRDDFLK;GSGFPIHLTR;KGDLVAIFPPVLHGDPEIFEAPEEFRYDR;QVFEPQLLK;RPGEPPLIK
-2.71738	-2.93186	-2.98795	-2.92373	-2.8226	-2.89996	-0.00685914	0.0251348	3	3	158.54	O75882;Q5VV63	ATRN	Attractin	ALYVHGGYK;ENYDNAK;YGHSLALYK
0.920868	0.566526	0.772845	0.678411	0.624127	0.782	0.14032	1.02808	8	8	21	O75884	RBBP9	Serine hydrolase RBBP9	ASGYFTRPWQWEK;AVIVPGNGGGDVTTHGWYGWVK;EQQEVADR;EQQEVADRLETK;ESIWLPFMETELHCDEK;FTDCGHFQNTEFHELITVVK;IPGFQCLAK;VYAIVLVSAYTSDLGDENER
-0.551725	-0.823261	-0.796254	-0.796959	-0.829274	-0.801451	0.0865396	0.428331	9	7	58.164	O75886	STAM2	Signal transducing adapter molecule 2	AIELSLQEQK;ALYDFEAVEDNELTFK;DPQFSLISATIK;HSELSELNVK;KHSELSELNVK;LVNEAPVYSVYSK;PLFTANPFEQDVEK;QQHTETK;VLEALELYNK
-1.90696	-1.70706	-1.74169	-1.71912	-1.75301	-1.68796	-0.0703589	0.49987	4	2	98.828	O75891	ALDH1L1	Cytosolic 10-formyltetrahydrofolate dehydrogenase	FLFPEGIK;IGFTGSTEVGK;LPQPEEGATYEGIQK;VSLELGGK
-2.94752	-2.39043	-2.84853	-2.47326	-2.56394	-2.64859	-0.322811	2.24865	2	2	12.074	O75896	TUSC2	Tumor suppressor candidate 2	AVPPFVFTR;GLWPFASAAGGGGSEAAGAEQALVRPR
-2.77975	-2.86788	-2.90166	-2.79079	-2.97437	-2.87516	-0.000137011	0.000595908	3	3	55.278	O75907	DGAT1	Diacylglycerol O-acyltransferase 1	ASSAAAPHTVSYPDNLTYR;LFLENLIK;LQDSLFSSDSGFSNYR
-1.37866	-1.30513	-1.40017	-1.32993	-1.30906	-1.39645	-0.0512447	0.851653	6	6	64.239	O75909	CCNK	Cyclin-K	DLAHTPSQLEGLDPATEAR;DPQQPAQQQQPAQQPK;FDLQVEHPYQFLLK;FIFDVGTR;FYMFHSFK;ILLQTIK
1.76341	1.55265	1.67212	1.62013	1.57843	1.64636	0.0617549	0.514645	9	9	33.548	O75911	DHRS3	Short-chain dehydrogenase/reductase 3	EEVYQTAK;EKVGDITILVNNAAVVHGK;ENVLITGGGR;ETTEEIR;FPNLFPPLKPETVAR;SILPQAALEEIHK;SLMDSDDDALLK;SQHINTLGQFWTTK;VGDITILVNNAAVVHGK
2.43649	2.1882	2.37924	2.28341	2.22048	2.32479	0.117932	1.47194	8	8	21.614	O75915	ARL6IP5	PRA1 family protein 3	AWDDFFPGSDR;FARPDFR;LTDYISK;MDVNIAPLR;MEGIGLK;MEGIGLKR;RTPMGIVLDALEQQEEGINR;TPMGIVLDALEQQEEGINR
-1.96036	-0.783491	-1.26664	-0.279848	-1.12916	-0.892832	-0.690353	0.898378	2	1	71.835	O75925	PIAS1	E3 SUMO-protein ligase PIAS1	LTADPDSEIATTSLR;MADSAELK
0.72699	0.855122	0.919932	0.882097	0.884435	0.866753	-0.0231469	0.133049	11	11	26.131	O75934	BCAS2	Pre-mRNA-splicing factor SPF27	AGTGLVAGEVVVDALPYFDQGYEAPGVR;EAAAALVEEETRR;EMESNWVSLVSK;HIQDLNWQR;QPIELLSMK;QQHGEANK;QQHGEANKENIR;RYELPAPSSGQK;TIVQLENEIYQIK;VYNENLVHMIEHAQK;YELPAPSSGQK
1.72488	1.48069	1.60058	1.56372	1.53215	1.58599	0.0830275	0.888718	10	10	21.119	O75935	DCTN3	Dynactin subunit 3	AGLTDLQR;ALLEEYNK;AVPEHAAR;IAIPDASK;KIEDLIK;KVADGLVK;MAGLTDLQR;VQVALGNISSK;WVYGPGGAR;YLDPEYIDR
2.51817	2.29967	2.38463	2.33193	2.30244	2.37281	0.09887	0.991845	12	12	29.841	O75937	DNAJC8	DnaJ homolog subfamily C member 8	AASGESGTSGGGGSTEEAFMTFYSEVK;AFEAVDK;ALDVIQAGK;DSVLTSK;EGKPTIVEEDDPELFK;EYVEHTVK;KEGKPTIVEEDDPELFK;LFAELEIK;LLLDQEQK;LTRPGSSYFNLNPFEVLQIDPEVTDEEIK;QLSILVHPDKNQDDADR;QREEEIEAQEK
-0.783188	-1.15722	-0.95305	-1.15879	-1.07189	-0.986963	0.179202	1.13626	5	5	26.711	O75940	SMNDC1	Survival of motor neuron-related-splicing factor 30	AQLQQVEAALSGNGENEDLLK;DLLSTQPSETLASSDSFASTQPTHSWK;DLQEVIELTK;IKELEQEREDQK;SIFASPESVTGK
-5.34317	-5.15021	-5.32484	-5.26892	-5.08749	-5.33783	-0.0975084	0.57918	4	4	77.054	O75943	RAD17	Cell cycle checkpoint protein RAD17	DSHTLHEVLR;EYLSENEPWVDK;GNLSSLEQIYGLENSK;IILVEDLPNQFYR
3.84228	3.26993	3.71717	3.40051	3.46991	3.57095	0.27695	1.88003	15	15	18.491	O75947	ATP5PD	ATP synthase subunit d, mitochondrial	AGLVDDFEK;AGLVDDFEKK;AIASSLK;IVEYEKEMEK;KKYPYWPHQPIENL;KYPYWPHQPIENL;LAALPENPPAIDWAYYK;NLIPFDQMTIEDLNEAFPETK;SCAEWVSLSK;SWNETLTSR;TIDWVAFAEIIPQNQK;VPVPEDK;VPVPEDKYTAQVDAEEKEDVK;YPYWPHQPIENL;YTAQVDAEEKEDVK
-1.58825	-1.80758	-1.77028	-1.82413	-1.78809	-1.67588	0.0940768	0.604137	1	1	26.779	O75954	TSPAN9	Tetraspanin-9	EGLLLYHTENNVGLK
2.69646	2.44971	2.62615	2.51274	2.53228	2.58084	0.106915	1.57276	27	27	47.355	O75955	FLOT1	Flotillin-1	AAYDIEVNTR;AEAEQMAK;AIMAHMTVEEIYKDR;AQADLAYQLQVAK;AQQVAVQEQEIAR;DIHDDQDYLHSLGK;GEAEAFAIGAR;HGVPISVTGIAQVK;IGEAEAK;IGEAEAKR;ISLNTLTLNVK;ITLVSSGSGTMGAAK;KAAYDIEVNTR;KAEAFQLYQEAAQLDMLLEK;KPAEAER;LPESVER;LPQVAEEISGPLTSANK;LTGVSISQVNHKPLR;QQIEEQR;SPPVMVAGGR;SQLIMQAEAEAASVR;TEAEIAHIALETLEGHQR;TKQQIEEQR;VASSDLVNMGISVVSYTLK;VQVQVVER;VSAQYLSEIEMAK;VTGEVLDILTR
-0.270542	-0.0359573	-0.295032	-0.0737572	-0.119758	-0.209482	-0.149474	1.67811	20	20	346.9	O75962;O60229	TRIO	Triple functional domain protein	AHLGEVLEAVR;ALGISSDSNK;AMDVLPILK;APIEDLDLEGQK;DFFLGELEK;DLADIAAFFR;DSAISSNK;EGEDLIQQLR;EHEQFQHAIEK;ELPQDLEGAR;GFSMPGFLFK;GGPILTFPAR;LEELQDILAK;LLLQDTFLVTDQDAGLLPR;LQLTDLLIKPVQR;QIASQLEQEWK;QQELDLAAEQHR;SLQLDIIPASIPGSEVK;VAFEDYISNATHMLSR;VQDLLEFLHEK
2.03684	1.76882	1.93891	1.82669	1.87536	1.91789	0.0846106	0.799779	7	7	11.428	O75964;Q7Z4Y8	ATP5MG	ATP synthase subunit g, mitochondrial	AIQSLKK;GIIGYDV;IVNSAQTGSFK;KIVNSAQTGSFK;LATFWYYAK;TPALVNAAVTYSKPR;VELVPPTPAEIPR
2.11173	1.9266	1.98692	1.8782	1.96263	1.97287	0.0973511	0.92956	44	43	221.62	O75970	MPDZ	Multiple PDZ domain protein	AGPFHSER;AKDTVQLVIAR;DADLSPVNASIIK;DASHEQAVEAIR;DIPELPEREEGEGEESELQNTAYSNWNQPR;ENYEKDEDFLSSTR;ETEPTVTTSDAAVDLSSFK;GAPSGTVR;GDVANEDKLSLLK;GELGIFVQEIQEGSVAHR;GGIADADGR;GHSGLGLSLAGNK;GHSGLGLSLAGNKDR;GLGFSILDYQDPIDPASTVIIIR;GLGLSIVGK;GNSSLGMTVSANK;GPDGLGFSIVGGYGSPHGDLPIYVK;GSLPQLVSPIVSR;HSLIGPDIK;HVLEDSPAGK;IGDTDLAGMSSEQVAQVLR;IGVAKPLPLSPEEGYVSAK;ISLGQQSGR;ISQDVDKEDEFGYSWK;IVEVDGMDLR;KATHDEAINVLR;KLE…
1.76824	1.84914	1.68213	1.84038	1.81302	1.8019	-0.101362	1.62416	30	30	152.93	O75976	CPD	Carboxypeptidase D	AIIENLIQK;ATGIYSK;AVIVLNEGIK;AYASNHPIMK;DFHHHHFPDMEIFLR;DLSAENGLESLMLR;EAAAAGLPGLAR;EFETLIK;ELPNFWEQNR;ELPNFWEQNRR;ESLITLIEK;GAEWHSHLGSMK;GASSSTNDASDPTTK;GFVLDATDGR;GVHGFVK;GYNPVTK;IVIVPSLNPDGR;KNPAVTQLVDR;LLVPGTYK;LPSLWADNKR;LTAGLGSLIPEGDAGPDAAGPDAAGPLLPGRPQVK;LVGNMHGDETVSR;QVHQGVR;SFPDQFSTGEPPALDEVPEVR;SLIQFMK;SPDDAVFQQIALSYSK;SQEGDSISVIGR;SSTDSNNESK;YIGNMHGNEVVGR;YYHEEELESALR
0.885777	0.909447	0.872985	0.885521	0.879493	0.864244	0.00352669	0.182789	14	14	37.432	O76003	GLRX3	Glutaredoxin-3	ASVMLFMK;AYSNWPTYPQLYVK;ELKENGELLPILR;ELPQVSFVK;ENGELLPILR;GELVGGLDIVK;GTPQEPR;HNIQFSSFDIFSDEEVR;IDRLDGAHAPELTK;LDGAHAPELTK;LEAEGVPEVSEK;LEAEGVPEVSEKYEISSVPTFLFFK;QMVEILHK;YEISSVPTFLFFK
2.06755	1.99288	2.03903	2.01634	1.95577	1.99882	0.0455882	0.799609	25	25	54.972	O76021	RSL1D1	Ribosomal L1 domain-containing protein 1	AAESETPGK;AAESETPGKSPEK;ALPASETPK;ATNESEDEIPQLVPIGK;DDVAPESGDTTVK;DEPNSTPEK;EQTPEHGK;FFTTPSK;IKEEAVK;KALPASETPK;KEQTPEHGK;KTASVLSK;KVPVSVNLLSK;LLPSLIGR;LLSSFDFFLTDAR;LPEKWESVK;LTLPHSIR;MEDSASASLSSAAATGTSTSTPAAPTAR;SAALPIFSSFVSNWDEATK;SAALPIFSSFVSNWDEATKR;SPNPSTPR;TASVLSKDDVAPESGDTTVK;TVSQIISLQTLK;TVSQIISLQTLKK;VPVSVNLLSK
2.19235	2.03586	2.13526	2.08892	2.06304	2.11958	0.0626818	1.15519	24	24	100.29	O76024	WFS1	Wolframin	AALVMYWK;ADGTGPTKGDMEIPFEEVLER;APGPQAGPGPGVR;AQTEVGK;DAAAPAEPQAQHTR;EYLIDMASR;GDMEIPFEEVLER;GITSENER;GVIPSSLFLQDDEDDDELAGK;GVIPSSLFLQDDEDDDELAGKSPEDLPLR;KQVAVAELLENVGQVNEHDGGAQPGPVPK;LNATASLEQER;LVSSESK;NYIALDDFVEITK;QGSLIEFSTILEGR;QLSSETDLER;QVAVAELLENVGQVNEHDGGAQPGPVPK;SPEDLPLR;SREEDDVTK;SREEDDVTKDIVLR;STVHGAVK;TLTDLLLR;WPVFELK;YPLHAIMEIK
-5.14027	-5.03884	-5.06435	-5.02906	-4.97635	-5.06596	-0.0492382	0.476046	6	6	38.363	O76027	ANXA9	Annexin A9	AITGQGVDR;ASDSAVDVAIEILATR;DSYSGIIDYNLAEQDVQALQR;IVMALLQPTAQFDAQELR;SAIVDVLTNR;SLYSSLQDAVK
1.68582	1.37963	1.58803	1.44501	1.46335	1.53518	0.137596	1.47062	22	22	69.223	O76031	CLPX	ATP-dependent Clp protease ATP-binding subunit clpX-like, mitochondrial	AAAAADLANR;AQQGIVFLDEVDK;DLIEFGMIPEFVGR;DVGGEGVQQGLLK;EPESAAEAVK;GGEVLDSSHDDIKLEK;IGSVPGIHQLR;IYNNIPANLR;KIYNYLDK;LLEGTIVNVPEK;LLQDANYNVEK;LPVVVPLHSLDEK;QQAEVEK;RREDEYR;SASEGSSK;SGESNTHQDIEEKDR;SIIKEPESAAEAVK;SNILLLGPTGSGK;TLLAQTLAK;TLVQILTEPR;YLGFGTPSNLGK;YVVGQSFAK
-2.48486	-2.78627	-2.41704	-2.62477	-2.6586	-2.60339	0.158158	2.10036	5	4	116.45	O76041	NEBL	Nebulette	AMYDYSAQDEDEVSFR;GFTPVVDDPVTER;GVHPHIVEMDR;KNTQVVSDAAYK;YHEDFEK
2.63955	2.49399	2.56	2.51689	2.5078	2.56633	0.0559711	0.802567	12	12	46.145	O76054;Q9UDX4	SEC14L2	SEC14-like protein 2	AGEMTEVLPNQR;ENVQDVLPALPNPDDYFLLR;FDNTYSFIHAK;FRENVQDVLPALPNPDDYFLLR;GLLFSASK;GSSHQVEYEILFPGCVLR;HISPDQVPVEYGGTMTDPDGNPK;IMVLGANWK;INYGGDIPR;QLGAGTPK;QQYEHSVQISR;VGDLSPR
-0.222504	-0.542654	-0.34962	-0.473032	-0.528014	-0.36853	0.155272	1.18956	7	7	46.405	O76062	TM7SF2	Delta(14)-sterol reductase TM7SF2	APTQGPR;AQVAPVSALAPGGNSGNPIYDFFLGR;KNPSDPR;LLGPPASLPGLEVLWSPR;VAEGQELK;VAEGQELKDK;VAGLETISTATGR
-0.739941	-0.740004	-0.88444	-0.80245	-0.791718	-0.890774	-0.0115668	0.0683644	5	5	37.84	O76071	CIAO1	Probable cytosolic iron-sulfur protein assembly protein CIAO1	HVVWHPSQELLASASYDDTVK;LASCSDDR;MKDSLVLLGR;SVLSEGHQR;VPAHPDSR
-4.85258	-4.50617	-4.66642	-4.42778	-4.52048	-4.71526	-0.144434	0.544794	3	3	99.984	O76074	PDE5A	cGMP-specific 3,5-cyclic phosphodiesterase	DSEGTVSFLSDSEK;ELQSLAAAVVPSAQTLK;GIVGHVAALGEPLNIK
-0.474287	-0.631966	-0.519212	-0.558695	-0.540971	-0.522181	0.0265064	0.477434	9	9	67.683	O76090;Q8N1M1	BEST1	Bestrophin-1	DHMDPYWALENRDEAHS;ESLLHEGLPK;LHSVTGIDTK;LMSLVSGFVEGKDEQGR;MEPDMYWNKPEPQPPYTAASAQFR;SVSTAVYK;TITYTSQVANAR;VAEQLINPFGEDDDDFETNWIVDR;YANLGNVLILR
2.58975	2.29051	2.49987	2.37804	2.32688	2.42507	0.147248	1.55046	26	26	74.605	O76094	SRP72	Signal recognition particle subunit SRP72	AIELLQEFSDQHPENAAEIK;ASGGSGGVSVPALWSEVNR;DIHTLAQLISAYSLVDPEK;DQNVFDSK;EAISDLQQLWK;EALNVINTHTK;ELYGQVLYR;EQGQGDLK;GTQGATAGASSELDASK;HLPSSDSMSLK;HQKPAGAPATK;ISQGNISK;KQLQAIEFNK;KTNLSAVVAAQSNWEK;LKELYGQVLYR;LTMAQLK;LTNAEGVEFK;QLQAIEFNK;SPAHLSLIR;TEEALQLYNQIIK;TIESANQQTDK;TIESANQQTDKLK;VDVEALENSAGATYIR;VLANNSLSFEK;VTGDSQPK;VTPDPER
3.76079	3.59686	3.6701	3.64605	3.60491	3.66584	0.0564047	0.682579	22	21	31.121	O94760	DDAH1	N(G),N(G)-dimethylarginine dimethylaminohydrolase 1	AGLGHPAAFGR;ALPESLGQHALR;ATHAVVR;DENATLDGGDVLFTGR;DHMLIPVSMSELEK;DYAVSTVPVADGLHLK;EFFVGLSK;GAEILADTFK;GAEILADTFKDYAVSTVPVADGLHLK;GEEVDVAR;GHVLLHR;IMQQMSDHR;IMQQMSDHRYDK;KEVDMMK;LKDHMLIPVSMSELEK;LQLNIVEMK;LQLNIVEMKDENATLDGGDVLFTGR;LTVPDDIAANCIYLNIPNK;QHQLYVGVLGSK;RKEVDMMK;SAKGEEVDVAR;TPEEYPESAK
-3.12238	-2.849	-3.11108	-3.07112	-3.12975	-3.31342	0.00921281	0.036258	2	2	108.86	O94762	RECQL5	ATP-dependent DNA helicase Q5	AVELEHETFR;AYHAGLK
-2.95149	-2.89444	-2.92139	-2.95287	-2.86339	-3.04741	0.0442699	0.300562	3	3	59.832	O94763	URI1	Unconventional prefoldin RPB5 interactor 1	LLPLSVTPEAFSGTVIEK;MEAPTVETPPDPSPPSAPAPALVPLR;TSDIFEADIANDVK
1.39369	1.22118	1.25378	1.21389	1.22783	1.25837	0.0700912	0.6764	11	11	37.121	O94766;Q9NPZ5	B3GAT3	Galactosylgalactosylxylosylprotein 3-beta-glucuronosyltransferase 3	EGEPGWVHPR;FEGPQVQDGR;GGAVGGEKDPPPPGTQGVVYFADDDNTYSR;GHLESSLLSHLVDPK;GSDPAIEV;GVSVWPVGLVGGLR;ISQLQAELR;LSQTLSLVPR;MKQEEQLQR;RPPPAPAQPPEPEALPTIYVVTPTYAR;VLVWHTR
1.96051	1.73972	1.85697	1.77621	1.78697	1.84095	0.0984809	1.24755	28	24	75.022	O94776	MTA2	Metastasis-associated protein MTA2	AAEADSK;ALTHLEMR;AVGTFAR;DISSSLNSLADSNAR;DITLFHAMDTLQR;DLVAQAPLKPK;EFEEESK;EFEEESKQPGVSEQQR;GHLSRPEAQSLSPYTTSANR;GLGGIMVK;GTTEPHSR;LNPADAPNPVVFVATK;LPLATIVK;LVEGESDNR;LVEGESDNRNQQK;QFESLPATHIR;QIDQFLVVAR;QPSLHMSAAAASR;RIEELNK;RPNLPLK;RPYAPINANAIK;SSSQPAAK;TLLADQGEIR;TPTQLEGATR;VGDYVYFENSSSNPYLVR;VKPTLIAVRPPVPLPAPSHPASTNEPIVLED;VWDPDNPLTDR;YQAEIPDRLVEGESDNR
-2.1876	-1.94965	-2.18764	-2.08507	-2.07266	-2.15893	-0.0701415	1.11999	6	5	112.13	O94804	STK10	Serine/threonine-protein kinase 10	ALDESHNQNLK;ALEEDLNQK;ASQSRPNSSALETLGGEK;EAALWEMEEHQLQER;LADFGVSAK;QFSQQEEK
-1.39364	-0.948181	-1.37867	-1.18197	-1.13223	-1.21354	-0.194934	2.6205	10	6	76.93	O94808	GFPT2	Glutamine--fructose-6-phosphate aminotransferase [isomerizing] 2	EIFEQPESVFNTMR;EIFETLIK;EITYMHSEGILAGELK;GSPLLIGVR;GYDSAGVAIDGNNHEVK;GYDVDFPR;GYEFESETDTETIAK;IKEITYMHSEGILAGELK;SVHYPGEAVATR;VIFLEDDDIAAVADGK
-0.901625	-0.979378	-0.962222	-0.987982	-0.989699	-0.971758	0.0446835	1.07545	3	3	23.693	O94811	TPPP	Tubulin polymerization-promoting protein	AISSPTVSR;FAVHGDAR;VDLVDESGYVSGYK
-2.00164	-1.77266	-2.00095	-1.87051	-1.83372	-1.99105	-0.109297	1.07146	2	2	15.113	O94817	ATG12	Ubiquitin-like protein ATG12	AVGDTPIMK;KIDILLK
0.355114	0.15443	0.216126	0.193445	0.179339	0.1936	0.0799967	0.849012	14	14	65.719	O94819	KBTBD11	Kelch repeat and BTB domain-containing protein 11	AGSRPQSPSGDADAR;AHLLAAALGPAGER;EGEAGGDAGQGGGFEALGAPLDVR;FDLSGSR;GEAQAAGPSGVSVSR;GVLIPFALSLPEKPPR;GVLIPFALSLPEKPPRGEQGAP;LLLADAYSGR;LPGGPTGLQPFR;LQLPGAAQR;MAGVRPDNVAEVVAGAR;SADMVALDGFIYR;VQGVSLTALR;WAPVAPLPR
-1.66367	-1.44338	-1.66243	-1.47598	-1.53482	-1.6116	-0.108008	1.21498	12	12	200.55	O94822	LTN1	E3 ubiquitin-protein ligase listerin	EATQQAFEK;EQLLSHK;FLSTLLDSFSSSR;GVLPYWPR;LLYHLFR;LMPELPQYDQDNLK;LMPENPTYAETAVEVPNKDPK;LPQSITNPK;NFLTSLVAGLSTER;SIDDGELLHGILK;TAHNLENVLIHFWER;VLDDLTK
3.57202	3.45414	3.52824	3.48516	3.41456	3.49744	0.0697161	1.0133	23	23	67.454	O94826	TOMM70	Mitochondrial import receptor subunit TOM70	AAAFEQLQK;AASKPVEAAVVAAAVPSSGSGVGGGGTAGPGTGGLPR;ADEMYDK;AIDMFNK;AIEIDNK;ASPAPGSGHPEGPGAHLDMNSLDR;AVELNPK;EIDAEGK;ENSGYLK;GFEEVIK;GLELISK;GLLQLQWK;GRGDASGLK;GSMYMQQQQPLLSTQDFNMAADIDPQNADVYHHR;LRPESALAQAQK;NREPLMPSPQFIK;NVDLSTFYQNR;QAYTGNNSSQIQAAMK;QYMEEENYDK;SDEDKDKEGEALEVK;SYFSSFTDDIISQPMLK;YGLKPPTL;YMAEALLLR
-5.87588	-5.93626	-5.94531	-5.97739	-5.83822	-5.84065	-0.0664155	0.43855	2	2	111.23	O94827	PLEKHG5	Pleckstrin homology domain-containing family G member 5	ALLQPGDFLK;LFSNIPEIAQLHR
-0.28779	-0.0934219	-0.256495	-0.139959	-0.0868425	-0.206825	-0.123515	1.57277	9	9	108.19	O94829	IPO13	Importin-13	ALHQLYYDPNIENK;AQFPSDEEYGFWSSDEKEQFR;DTFSQQILR;GLHGTDYTADY;IAVALGENHSR;LIPLVLGLQEQLR;REEQPGAAGAGAAPALDFTVENVEK;VVQEDGR;YWSDIPTDQYESLK
0.769299	0.700813	0.637908	0.678467	0.68361	0.657993	0.00519753	0.038244	14	14	81.031	O94830	DDHD2	Phospholipase DDHD2	AQENQQIGR;EIIILHNPK;EIYQTQGIFLDQPLQ;ETWIPFNSEDSQQLEEAYSSGK;GFFNIYHPFDPVAYR;ITLPSINR;KAQENQQIGR;LMVHYQPVAGSDDWGSTPTEQGRPR;RPAPQPASGANIPK;SVSLNLLQTHFK;VEFLPVNWHSPLHSTGVDVDLQR;VVPTDGGR;YAVYWDELASEVR;YDVHLGER
2.19937	2.05428	2.09508	2.10798	2.02931	2.08717	0.0624968	0.724562	33	33	116.2	O94832	MYO1D	Unconventional myosin-Id	AEQESLEFGK;AWEGNYLASKPDTPQTSGTFVPVANELK;AWEGNYLASKPDTPQTSGTFVPVANELKR;DQLVVFHTK;DTIEQYK;ELYERPPHLFAIADAAYK;FVVDGDTPLIENGK;GDPIGGHINNYLLEK;HIDYFNNQIIVDLVEQQHK;HQVEYLGLLENVR;HYAGDVVYSVIGFIDK;IGELVGVLVNHFK;ILEFDRDFR;INDIIEVK;IVLFLQK;LMYNSSNPVLK;LNQPQPDFTK;LSITEVTK;NSMIALVDNLASK;NYDTTIHGK;RFEEALQTIFNR;RPLTAATLFK;SGFILSVPGN;SIPASDLPQVR;SPQIFDDER;SSINDAAEFR;TLFTLEELR;VAAVEMLK;VIGFKPEEIQTVYK;VIVQQPGER;V…
-1.92403	-2.16719	-2.04239	-2.27317	-2.15457	-2.03376	0.150605	0.880615	4	4	66.194	O94842;O15405;O94900;Q96NM4	TOX4;TOX3	TOX high mobility group box family member 4;TOX high mobility group box family member 3	GLQLGQTSTATIQPSQQAQIVTR;GQNPNATFGEVSK;INLQQQPPPLQIK;IVASMWDSLGEEQK
1.36196	1.42949	1.31934	1.35862	1.42014	1.36198	-0.0456448	0.877358	13	13	113.01	O94855	SEC24D	Protein transport protein Sec24D	AVLHQPLK;AVTVEFK;EQPEMVFR;GGQVYATNTR;ILFQPQTNVYDSLAK;IPKEEQEETSAIR;KLDPDSIPSPIQVIENDR;LDPDSIPSPIQVIENDR;LFIFHSSLPTAEAPGK;LVNTDKEK;MIMGIIQQK;VGFITYNK;VLHFFNVK
2.3233	2.23622	2.26389	2.28783	2.25252	2.2862	0.0101299	0.17333	30	29	89.594	O94874	UFL1	E3 UFM1-protein ligase 1	ADAWEEIRR;AQFAEATQR;ATEGSGSMR;AVFVPDIYSR;DLQEEVSNLYNNIR;ELQELSSSIK;EMRDELHVR;EYITPAQISK;FFADDTQAALTK;GLFSAITRPTAVNSLISK;GVIFTEAFVAR;HVQLVLGQLIDENYLDR;IISGHIDLDNR;IPEDQHALLVK;KELQELSSSIK;KTGQGDYPLNNELDKEQEDVASTTR;LGIPDAVSYIK;LHNSLNEK;NCIEIVNK;NNPVHLITEEDLK;QILFQHR;QISTLESVSTSK;QLEVVHTLDGK;QLEVVHTLDGKEYITPAQISK;QLVSQSK;TQSTWVDSFFR;TTQLLFLK;TYDLPGNFLTQALTQR;VNIVDLQQVINVDLIHIENR;YQGLVVK
2.97955	2.85159	2.83577	2.84264	2.86424	2.83475	0.0408211	0.364651	33	33	124.11	O94875	SORBS2	Sorbin and SH3 domain-containing protein 2	APHYPGIGPVDESGIPTAIR;AQPARPPPPAQPGEIGEAIAK;DASSPVPPPHVPPPVPPLRPR;ESDVIDVMEK;FFGTFPGNYVK;GAEDYPDPPIPHSYSSDR;GDTVYILR;GLGDQSASR;HDWDPPDR;HDWDPPDRK;IDQNWYEGEHHGR;KGDTVYILR;KIDQNWYEGEHHGR;KSEPAVGPPR;NEDELELR;QGIFPVSYVEVVK;QGIFPVSYVEVVKK;RVDQNWYEGK;SEPAVGPPR;SFTSSSPSSPSR;SHSDNSPNAFK;SIFEYEPGK;SLERPMSSASMASDFR;SLERPMSSASMASDFRK;SSEEEKR;SSILQHERPASLYQSSIDR;SSTEKHDWDPPDR;SYSSTLTDMGR;TQTYRPLSK;TTVDRPK;VDL…
-2.85918	-2.80969	-3.0368	-2.95461	-2.89587	-2.96785	-0.0210959	0.136016	5	5	72.082	O94876	TMCC1	Transmembrane and coiled-coil domains protein 1	AAIAHLQQK;ALGVISNFQSSPK;DMHQGLK;IAYQSYER;LEESFETLK
-2.43056	-2.43927	-2.51207	-2.50804	-2.4563	-2.48379	0.00603135	0.0746162	6	6	106.99	O94880	PHF14	PHD finger protein 14	GTGDNENLVR;KAELMGISTDIFPVDNSDTSSSVDGR;LNIPAILR;QLSPEAQAR;SEGQGIWALLGR;SFVPEEEKHEER
-0.416367	-0.349373	-0.450683	-0.425871	-0.343575	-0.379045	-0.0545127	0.979231	8	8	136.65	O94885;Q9NSI8	SASH1	SAM and SH3 domain-containing protein 1	GVDLETLTENK;KPSTEGGEEHVFENSPVLDER;LKEYEAQHR;MITIEEALAR;SALYSGVHK;SVEDLLDR;VHTDFTPSPYDTDSLK;YAEDLDQPERDVAANMDQIR
-0.831703	-0.665365	-0.873925	-0.724371	-0.668981	-0.837641	-0.138131	1.10552	6	6	92.125	O94886	TMEM63A	CSC1-like protein 1	ETVESHFR;GEPQPSSHSR;HVQDQPLGMAFVTFQEK;IALVSEADSESR;KETVESHFR;TLFITGLPR
-0.649771	-0.156216	-0.537045	-0.262695	-0.363503	-0.483257	-0.199828	1.24413	13	13	119.89	O94887	FARP2	FERM, ARHGEF and pleckstrin domain-containing protein 2	ADHSAAVENQLSGYLLR;AITEVTTTLQHILIR;ALTADLPK;APSIVQDGPQPSSGLEGMVR;DLVGIENLIAPGR;ILEFHQK;LALWEGPSK;LGAQTPVGVSTLEPGQTLLPR;LLDNTMEIFDIEPK;LLDQPKPK;QSISFPEGLR;SSLEGHGQHR;VPADEAYFIVK
0.198612	-0.0101681	0.14568	0.0123882	0.0614653	0.0758266	0.1179	2.0408	12	11	54.862	O94888	UBXN7	UBX domain-containing protein 7	ASLQETHFDSTQTK;DFQTETIR;EQITLPEQAK;FELLTNFPR;GLIQQFTTITGASESVGK;GSFETAK;LGDFPYVSILDPR;LTTLADLFRPPIDLMHK;QEILVEPEPLFGAPK;RPLTEPPVR;SIFDGFR
1.67652	1.62059	1.62785	1.60375	1.67984	1.65778	0.00262896	0.0332187	20	20	87.109	O94901	SUN1	SUN domain-containing protein 1	AIVNSALK;DLQLQILR;ELTTLLQK;EQTTVDHFWGLDDDGDLK;ETDFMAFHQEHEVR;FSSQFVSK;GDLQTMLR;GSQGYLVVR;KDVLTAHPAAPGPVSR;LLFSEDQQGGSLEQLLQR;MSHLEDILGK;QLPTSEAVVSAVSEAGASGITEAQAR;QVTSSGVSHGGTVSLQDAVTR;RPDDTAFQIVELR;RPPVLDESWIR;SAFSINHVSR;TISAVGEQLLPTVEHLQLELDQLK;TLSPTGNISSAPK;VDDPQDVFKPTTSR;VHGEPVK
2.04612	1.83291	1.93979	1.90636	1.86904	1.88917	0.0791047	0.889833	13	13	30.344	O94903	PLPBP	Pyridoxal phosphate homeostasis protein	APLEVAQEH;DLPAIQPR;HGLPPSETIAIVEHINAK;IGSTIFGER;ILSLCPEIK;LADKVNSSWQR;LMAVPNLFMLETVDSVK;TFGENYVQELLEK;TKPADMVIEAYGHGQR;VMVQINTSGEESK;VNSSWQR;VQQAVAR;WHFIGHLQK
3.91475	3.50855	3.74906	3.61311	3.56699	3.69393	0.165461	1.05726	27	21	37.839	O94905	ERLIN2	Erlin-2	AIASNSK;ALIEAEK;DIPNMFMDSAGSVSK;EAETERK;GGALLTSTSGPGFHLMLPFITSYK;IEEGHIGVYYR;IEVVNFLVPNAVYDIVK;ISEIEDAAFLAR;KALIEAEK;KISEIEDAAFLAR;LALQQDLTSMAPGLVIQAVR;LKLTPEYLQLMK;LLIAAQK;LSFGLEDEPLETATK;LSFGLEDEPLETATKEN;LTPEYLQLMK;NYELMESEK;QFEGLADK;QFEGLADKLSFGLEDEPLETATK;QFEGLADKLSFGLEDEPLETATKEN;SVQTTLQTDEVK;VAQVAEITYGQK;VMEKETEK;VMEKETEKK;VTKPNIPEAIR;VTKPNIPEAIRR;VVEKEAETER
2.20926	1.98669	2.0954	2.03293	2.01914	2.08579	0.0818837	0.829785	38	38	106.92	O94906	PRPF6	Pre-mRNA-processing factor 6	AAELETDIR;AAVELEEPEDAR;AEVLWLMGAK;AIYAYALQVFPSK;AIYAYALQVFPSKK;ALEHVPNSVR;AVIGIGIEEEDRK;AVVAQAVR;DANDPVDDR;DIANWQK;EAYNQGLK;EAYNQGLKK;ESLEALLQR;ETNPHHPPAWIASAR;FELQHGTEEQQEEVR;FELQHGTEEQQEEVRK;GQIEEQK;GYLTDLNSMIPTHGGDINDIK;GYLTDLNSMIPTHGGDINDIKK;HIWITAAK;HLQTGENHTSVDPR;HYEDFPK;IDSDLGDAWAFFYK;IQQQFSDLK;IQQQFSDLKR;KALEHVPNSVR;KLAEVTEEEWLSIPEVGDAR;LEEANGNTQMVEK;LESENDEYER;LETYENAR;LEWVQDNIR;LQPGDTAK…
-4.92151	-4.92442	-5.08706	-4.95392	-5.13918	-5.08318	0.0457004	0.246674	1	1	183.67	O94911	ABCA8	ABC-type organic anion transporter ABCA8	LPVEDVQPLAQAFFK
-4.68016	-4.30692	-4.60873	-4.43518	-4.39	-4.53976	-0.186777	1.72377	4	4	173.05	O94913	PCF11	Pre-mRNA cleavage complex 2 protein Pcf11	APHQVPVQSEK;EIVSLIEAQTAK;LASGEITQDDFLVVVHQIR;VHEEVVLK
1.49386	1.69076	1.48378	1.50609	1.64397	1.58462	-0.105029	1.14933	15	15	339.59	O94915	FRYL	Protein furry homolog-like	ALKQPLTATTLSDVLSR;DTPLNIFVK;EAESASENEEIDISK;EIIFDLLSVGK;ELIEELHPIIK;EVTDVHPTLLDNAVK;GPLWNHEDVSAK;KIEVVMAEPLEK;LLIHLPLDK;LQLLSPQVDINSPINAK;SAEQLTTFLK;SNITIDPDVKPGEYVIK;TLMEFITSR;VFLVIADSLQQK;YLHDSFSDTTFNLVTYLAELLEK
1.00147	0.758017	0.869107	0.794096	0.777875	0.824123	0.104797	0.951926	12	12	55.016	O94919	ENDOD1	Endonuclease domain-containing 1 protein	ALTPQCGSGEDLYILTGTVPSDYR;APRPAPGGAEQR;DRIPVYSAFR;DSDIIEDVMVK;FFYAGTPPAGLAADSHVK;ILEVVNQIQDEER;KILEVVNQIQDEER;QALNTDYLDSDYQR;SSSPLSSTR;STLLPPEASEGSSSFLGK;VTFDNSGEL;WYVNLHSLMDR
-2.75955	-2.38523	-2.72425	-2.41453	-2.53293	-2.47369	-0.257821	2.64557	4	4	70.1	O94923	GLCE	D-glucuronyl C5-epimerase	AMLPLYDTGSGTIYDLR;APPVVGGFNSNVGSK;EGNEVFLPFTWVEK;VVQYDGYDRFEFSHSYSK
0.773169	0.544817	0.589046	0.659645	0.541354	0.586508	0.0663821	0.429343	12	12	73.46	O94925	GLS	Glutaminase kidney isoform, mitochondrial;Glutaminase kidney isoform, mitochondrial 68 kDa chain;Glutaminase kidney isoform, mitochondrial 65 kDa chain	DGPGETDAFGNSEGK;ELVASGENK;FDYVMQFLNK;HSTGDTK;LTLQTTSDGVMLDKDLFK;MAGNEYVGFSNATFQSER;NFAIGYYLK;TALHVAAAEGHVEVVK;VADYIPQLAK;VLSPEAVR;YAIAVNDLGTEYVHR;YVGKEPSGLR
-6.39275	-6.60936	-6.55408	-6.52304	-6.39605	-6.57096	-0.00630601	0.0278865	1	1	71.682	O94927	HAUS5	HAUS augmin-like complex subunit 5	AQFLQNLLLPQAK
-3.05542	-3.10281	-3.2336	-3.20199	-3.13529	-3.20332	0.0417045	0.30015	2	2	72.269	O94952	FBXO21	F-box only protein 21	EGIDQSYQLLR;QLGVPLEPVNFPSHFLLR
-3.35832	-3.02644	-3.52016	-3.22234	-2.9889	-3.33811	-0.276778	1.13481	6	6	69.413	O94955	RHOBTB3	Rho-related BTB domain-containing protein 3	ALNSVPVIIAAVGTR;DTAFPGASHESSGNPPLR;ELASMNLDIVDLLK;LKDSGDVSNVIEK;SIHIVALGNEGDTFHQDNRPSGLIR;SPTDIQDSSIIR
-4.11205	-2.31898	-3.46886	-2.72869	-2.81002	-3.0263	-0.752275	1.28045	2	2	183.86	O94964	MTCL2	Microtubule cross-linking factor 2;N-terminal form;C-terminal 80 kDa form	LLLNELAK;SSAELEDQNK
-2.25142	-2.16233	-2.21675	-2.21107	-2.07842	-2.14043	-0.101893	1.1648	6	6	145.65	O94966	USP19	Ubiquitin carboxyl-terminal hydrolase 19	DKINDLVEFPVR;ENSTASEVLDSLSQSVHVKPENLR;GPVPSTSGISSEMLASGPIEVGSLPAGER;LFDDSTVTTVDESQVVTR;LQEFVLVASK;VLPVFYFAR
-2.9923	-3.44196	-3.33581	-3.42352	-3.34927	-3.29883	0.159374	0.650043	2	2	101.95	O94967	WDR47	WD repeat-containing protein 47	AAYADLLTPLISK;LILDFLNSK
1.32738	1.22223	1.26279	1.21972	1.24182	1.28862	0.0423768	0.697258	30	17	103.96	O94973	AP2A2	AP-2 complex subunit alpha-2	AKHPMDTEVTK;ALDGYSK;ALLLSTYIK;DDVQGYAAK;EMAEAFAGEIPK;ESSILAK;FFQPTEMASQDFFQR;FVNLFPEVKPTIQDVLR;GLAVFISDIR;GPSTVTDLEDTK;GPSTVTDLEDTKR;HPMDTEVTK;IAGDYVSEEVWYR;INKELANIR;KGPSTVTDLEDTKR;KVQHSNAK;LEPNLQAQMYR;LINNAIK;LSTVASTDILATVLEEMPPFPER;MFIFYGNK;NADVELQQR;QLSNPQQEVQNIFK;SSPLIQFHLLHSK;THIETVINALK;TSPDLVPMGDWTSR;VAILAEK;VGGYILGEFGNLIAGDPR;VLVAGDTMDSVK;VQHSNAK;YGGTFQNVSVQLPITLNK
4.00119	3.80148	3.90061	3.80527	3.82904	3.8974	0.0938632	1.04568	37	37	133.01	O94979;Q9NQW1	SEC31A	Protein transport protein Sec31A	AQDGSHPLSLQDLIEK;AQGEPVAGHESPK;ATVWDLR;ATVWDLRK;AVQLTQAMDTSTVGVLLAAK;EQTLSPTITSGLHNIAR;EVVIAQNDK;GDVSGVLIAGGENGNIILYDPSK;GRPGPVAGHHQMPR;IDASQTEFEK;IIAGDKEVVIAQNDK;IIAGDKEVVIAQNDKHTGPVR;ISVYSIMGGSTDGLR;KAVQLTQAMDTSTVGVLLAAK;KIALALNK;KIDASQTEFEK;KLDDASK;KNEPIIK;KPIPDEHLILK;LEFLYDK;LITAVVMK;LIWGPYK;LVTFENVR;MADAIILAIAGGQELLAR;MPSHQGAEQQQQQHHVFISQVVTEK;MPSHQGAEQQQQQHHVFISQVVTEKEFLSR;NPAVLSAASFDGR;NVW…
-6.55116	-5.8952	-6.44272	-6.15473	-6.01466	-6.2614	-0.34114	1.90525	1	1	109.79	O94985	CLSTN1	Calsyntenin-1;Soluble Alc-alpha;CTF1-alpha	AASEFESSEGVFLFPELR
-1.99161	-2.04927	-2.11835	-2.14697	-1.88681	-1.98114	-0.068847	0.327478	2	2	195.62	O94986	CEP152	Centrosomal protein of 152 kDa	AFQDTLPLLVENADPEWK;LEELQTLCK
2.00462	1.67387	1.77211	1.70324	1.66089	1.76102	0.145048	0.829781	20	20	116.93	O94988;Q9NYF5;Q8NE31	FAM13A	Protein FAM13A	AANPEVLK;AESSRPEDIKDMTK;AIKPSVEATLESIQR;ALLYYESIHGRPVTK;ANTIPIIGSPSSK;DFEDNFFR;DQIANEK;IQEHPSLSDTK;ISEEDLTPR;KFEDRFEEEK;LKISEEDLTPR;LLEVLISK;LRDFEDNFFR;QVMKPLYDR;RAESSRPEDIK;RAESSRPEDIKDMTK;SFGSQLEKEDEK;SPLLQPIIEGETASFFK;TPMAEEYSEYK;WTNDLAK
-0.697573	-0.928612	-0.804255	-0.913021	-0.900241	-0.94034	0.131093	1.26251	5	5	40.623	O94992;Q96MH2	HEXIM1	Protein HEXIM1	AENLQLLTENELHR;DFSETYER;EYLELEK;GQPVAPYNTTQFLMDDHDQEEPDLK;LGAPAAGGEEEWGQQQR
-3.50291	-3.38681	-3.60643	-3.44965	-3.47997	-3.39716	-0.0522712	0.297092	2	2	22.329	O95057	DIRAS1	GTP-binding protein Di-Ras1	ELFQELLTLETR;GSVEDIPVMLVGNK
-1.75113	-1.15514	-1.6875	-1.37585	-1.45119	-1.68697	-0.202936	0.988998	4	4	32.011	O95070	YIF1A	Protein YIF1A	AYHSGYGAHGSK;LGLLVFPYTHQNWEVQYSR;TAALGPDSMGGPVPR;YFFAVDTAYVAK
0.301476	0.279573	0.22483	0.265738	0.286218	0.286228	-0.0282447	0.468838	26	26	309.35	O95071	UBR5	E3 ubiquitin-protein ligase UBR5	AASTAPSSTSTPAASSAGLIYIDPSNLR;AAVIIMAVEK;AEQENNFPTSSIAFLGQNER;ANAHFILK;ATFLGLTNEK;AYPAAITILETAQK;EGEPNLDKK;ENGADSILDLGLVDSSEK;EVVFVEDVK;GFYTPRPGK;GLLDVLPK;GVHAVLK;IGHLLPEEQVYLNQQSGTIR;KEDLFGRPSQGLYSSSASSGK;LEHTAQTYSELQGER;LLTATNLVTLPNSR;LTYQDAVNLQNYVEEK;LYVPLYSSK;NAQNPSLHHPR;QISDLMGLIPK;SFYTAIAQAFLSNEK;TSIHFVVHPLPGTEDQLNDR;VATWVDETLSSVASK;VDEAMELIIAHGR;VLQDWNALK;VTFKDEPGEGSGVAR
-1.67401	-1.74424	-1.74392	-1.75765	-1.6947	-1.70822	0.00369008	0.0436986	4	3	48.962	O95081	AGFG2	Arf-GAP domain and FG repeat-containing protein 2	GLNPPHR;GSASTPVQGSIPEGKPLR;IWLGLFDAR;SISMTTFTEPEVVFLQSR
-4.27792	-3.95074	-4.24949	-4.00509	-4.0559	-4.13491	-0.167115	1.54837	2	2	43.001	O95084	PRSS23	Serine protease 23	DFLLNYPFSTSVK;GNANDIGMDYDYALLELK
-0.393421	-0.155567	-0.292571	-0.169741	-0.216691	-0.312698	-0.120839	1.08611	9	6	125.87	O95104	SCAF4	SR-related and CTD-associated factor 4	DLSIGNPIPTVVSGAR;GNAESGDSVK;GVSEAAVLKPSEELPAEATSSVEPEKDSGSAAEAPR;HQFGTDKDVFGPR;HVVQIVEK;IAWALNK;TVEPPISQVGNVDTASELEK;VLNLWQK;VPGLYVIDSIVR
2.44267	2.38811	2.39502	2.40019	2.37882	2.3756	0.0201562	0.407888	11	11	15.489	O95139	NDUFB6	NADH dehydrogenase [ubiquinone] 1 beta subcomplex subunit 6	DQELSPR;EFPDQHH;EPVLPPQK;IFPGDTILETGEVIPPMK;IFPGDTILETGEVIPPMKEFPDQHH;KMVHGVYK;MVHGVYK;MVHGVYKK;TGYTPDEK;WLKDQELSPR;YHVSEKPYGIVEK
2.60696	2.44613	2.48893	2.43255	2.47601	2.50464	0.0517807	0.475677	21	20	86.401	O95140	MFN2	Mitofusin-2	AQGMPEGGGALAEGFQVR;ENLEQEIAAMNK;GISEVLAR;HIEEGLGR;IEVLDSLQSK;IFFVSAK;KIEVLDSLQSK;LIMDSLHMAAR;LSVLVDDYQMDFHPSPVVLK;MFEFQNFER;NAELDPVTTEEQVLDVK;QFVEHASEK;QITEEVER;QLELLAQDYK;QVSTAMAEEIRR;STVINAMLWDK;TKFEQHTVR;TVNQLAHALHQDK;VEGTDGHEAFLLTEGSEEKR;WDASASEPEYMEEVR;WDASASEPEYMEEVRR
-0.960682	-0.888966	-0.945964	-0.88559	-0.940711	-0.908733	-0.0408948	1.16178	3	3	41.142	O95149	SNUPN	Snurportin-1	GSTSAYTK;LPEEEGLGEK;RLDYVNHAR
0.0153065	-0.0609131	-0.0741644	-0.0603237	-0.041543	-0.0229988	0.00837453	0.107012	24	24	146.18	O95155	UBE4B	Ubiquitin conjugation factor E4 B	AEIDYSDAPDEFRDPLMDTLMTDPVR;AIADDQR;DENPFASLTATSQPIAAAAR;DLKVENPEK;DSPLATR;ELFEEVISK;EQWDQLPR;FFEMIENHPLSTK;FYTDVEHTGATSEFYDK;HLLNSPTDPFNR;IHEVQEEMK;IKLETVDPTYIFHPR;ILDPAYPDITLPLNSDVPK;ILHSILLNGETR;ITLPNDETR;LAGGQTSQPTTPLTSPQR;LETVDPTYIFHPR;LLVPSLMK;NLPYGFIQELVR;QTLTESMLEPVPELK;STIAIEK;TTHQDEEVFK;YFSGPAITLENTR;YHISTIFK
1.55378	1.64512	1.56032	1.60615	1.60831	1.61202	-0.049249	3.7853	31	31	150.25	O95163	ELP1	Elongator complex protein 1	AFEDTLQLMER;AIGHLSK;ALVLAQIR;AVMESINPHK;DFEPILEQQIHQDDFGESK;DQLVGLGR;EESSIPK;ETQFHGSEGR;EVKNEVSLVAEGFLPEDGSGR;EYLPFLNTLK;EYLPFLNTLKK;GDGQFFAVSVVCPETGAR;GNLEVVHHR;INLNLIYDHNPK;IQFENNEDQDVNPLK;IVTVVPQDTK;KTTPELEIVLQK;LDIIETNVKPSILEAQK;LGAVGGSGFK;LVLQMPR;NEVSLVAEGFLPEDGSGR;QIDSVNHINLFFTELKEEDVTK;SVGDNSSDLSNVAVIDGNR;SVVLQLADGQIFK;TSVPVLDAELFIPPK;TTPELEIVLQK;VFLGNVETFIK;VHELQGNAPSDPDAVSAEEALK;VLFLFEFD…
0.566532	0.236006	0.473657	0.239479	0.418979	0.430403	0.128122	0.807712	5	2	13.918	O95166	GABARAP	Gamma-aminobutyric acid receptor-associated protein	EEHPFEK;FVYKEEHPFEK;KYPDRVPVIVEK;VPVIVEK;YPDRVPVIVEK
-0.359264	-0.630903	-0.418258	-0.525936	-0.552703	-0.42448	0.067948	0.480041	3	3	9.2787	O95167	NDUFA3	NADH dehydrogenase [ubiquinone] 1 alpha subcomplex subunit 3	ATPYNYPVPVR;ATPYNYPVPVRDDGNMPDVPSHPQDPQGPSLEWLK;YSVMINK
1.77374	1.65909	1.70483	1.75188	1.72214	1.70415	-0.015124	0.151169	7	7	15.208	O95168	NDUFB4	NADH dehydrogenase [ubiquinone] 1 beta subcomplex subunit 4	EKLIQEGK;EYLLQYNDPNR;EYLLQYNDPNRR;GLIENPALLR;LIQEGKLDR;TINVYPNFRPTPK;TLPETLDPAEYNISPETR
1.18888	0.713512	1.14973	0.959543	0.855092	0.983273	0.209761	1.89112	7	7	21.766	O95169	NDUFB8	NADH dehydrogenase [ubiquinone] 1 beta subcomplex subunit 8, mitochondrial	DMFPGPYPR;DPWYSWDQPGLR;GGDPSKEPER;LNWGEPMHWHLDMYNR;QYPYNNLYLER;SQHERDPWYSWDQPGLR;VEDYEPYPDDGMGYGDYPK
2.06162	1.99977	1.93235	1.93769	1.97837	1.9666	0.0193888	0.17206	10	10	12.551	O95182	NDUFA7	NADH dehydrogenase [ubiquinone] 1 alpha subcomplex subunit 7	ALVSGKPAESSAVAATEK;AVTPAPPIK;AVTPAPPIKR;ESVPPSIIMSSQK;KAVTPAPPIK;LPVGPSHK;NWASGHDLQGK;RWELSSDQPYL;WELSSDQPYL;YQEISKR
-0.976624	-0.823116	-0.938539	-0.989054	-0.751107	-0.887451	-0.0849972	0.536506	4	4	112.61	O95197	RTN3	Reticulon-3	AEPSAATQSHSISSSSFGAEPSAPGGGGSPGACPALGTK;TQIDHYVGIAR;VSGDDVIEK;YKTQIDHYVGIAR
3.25892	3.02504	3.15965	3.0167	3.05425	3.07239	0.138095	1.56892	30	30	83.353	O95202	LETM1	Mitochondrial proton/calcium exchanger protein	ADDKLIAEEGVDSLNVK;AEKEVAEVK;AEKEVAEVKS;AKLEATLQEEAAIQQEHR;ALGVTEDR;ALGVTEDRLR;AMYLPDTLSPADQLK;DDSVVEK;DFSVFFQK;EDVQDYSEDLQEIK;EKEELELLK;ETGERPSNEEIMR;FLQDTIEEMALK;ILNGHSLTR;KLEEGGPVYSPPAEVVVK;LEATLQEEAAIQQEHR;LEEGGPVYSPPAEVVVK;LFPNMLPSTFETQSLK;LFPNMLPSTFETQSLKEER;LIAEEGVDSLNVK;LLELQSIGTNNFLR;LLWIDTK;LTSLAAALDENK;LTSLAAALDENKDGK;LTSLAAALDENKDGKVNIDDLVK;STLQTLPEIVAK;VAEVEGEQVDNK;VKLELAK;VNIDDLVK;VV…
-0.832659	-1.03404	-0.916186	-0.926167	-0.989211	-0.930788	0.0353934	0.285149	3	3	68.481	O95208	EPN2	Epsin-2	ENIFAIQTLK;EVAEQEER;QLVALLKDEER
0.84754	0.464712	0.659625	0.607573	0.529073	0.651289	0.140315	0.97808	6	6	37.404	O95218	ZRANB2	Zinc finger Ran-binding domain-containing protein 2	AGGTEIGK;AVGPASILK;ENVEYIEREESDGEYDEFGR;EVEDKESEGEEEDEDEDLSK;LDEDEDEDDADLSK;TGYGGGFNER
0.817743	0.694939	0.712623	0.698889	0.693566	0.728426	0.0517826	0.720783	18	18	51.908	O95219	SNX4	Sorting nexin-4	AEFVWHK;EAEGAGEESSGVDTMTHNNFWLK;ETVNETGFQLK;EYLFYAEALR;HYSDELQSVISHLLR;IGLENFLLR;KHELMQYDLEMAAQDLASK;KIEISVSEAEK;KIEISVSEAEKR;LFGQETPEQR;LSADNMDPDFVER;MEQAPPDPER;QLQPAPLEPLGSPDAGLGAAVGK;RYSEFELLR;SVEHTDGQSVLTDSLWR;VFSEWSAIEK;VHGNYGR;VLEEQINEGEQQLK
1.8016	1.53993	1.72591	1.60105	1.53948	1.63745	0.146994	1.56175	15	15	51.466	O95232	LUC7L3	Luc7-like protein 3	ATVEELK;ATVEELKEK;EKQSEDTNTESK;IHDENLR;IHDENLRK;IQVLTDK;LALSQNQQSSGAAGPTGK;LVEQLKEER;MISAAQLLDELMGR;QHMGYAK;RTEEPDRDER;STTSTIESFAAQEK;TEEPDRDER;VDDHLMGK;YLQSLLAEVER
1.63697	1.62019	1.67487	1.63804	1.65224	1.63745	0.00204913	0.0424486	35	32	208.44	O95248	SBF1	Myotubularin-related protein 5	AALYILGDK;ALYLEPTEDLAPAQEVGEAPSQEDER;AQNAPSPGQSQADSSSLEQEK;AQPDAISR;AVLDHQQFDFVVR;EESTVFSQAIHYANR;EWLSFGHR;FLGYHHVSR;GLVEDDFLMK;GQPPPEDQEDEISVSEELEPSTLTPSSALKPSDR;GSGEGQGQILQR;GTPSSLLVSTAPHHR;GVIDLAEVEAVAPGTPTMGAPK;GVPYRPTDLFDELVAHEVAR;GVVGLFK;HVQELAEQLYK;IELGLLYEEK;ISVQTPVDQLLQDGLQLR;LDEGTVQWIVDQAAAK;LDHTEVFR;LEGRPDGR;LETELGQPAER;LLPAVLR;MSYLLLPLDSSK;QVIQTPLADSLPVSR;SALDVASEQR;SDPLQQWELVPIEVFEAR…
0.735046	0.449156	0.633065	0.583576	0.497178	0.607489	0.113776	1.18258	8	8	28.612	O95249	GOSR1	Golgi SNAP receptor complex member 1	AAGTSSYWEDLRK;DILQDYTHEFHK;FPAVNSLIQR;KDIESYK;LIEETISIAMATK;LTGVNDK;QLENELDLK;RTELFLK
-1.17556	-1.17663	-1.24512	-1.26462	-1.19616	-1.18876	-0.0133088	0.132553	5	5	70.642	O95251	KAT7	Histone acetyltransferase KAT7	ASEDLEK;HQAPTER;RQDLIDEWIAK;SQQQPTPVTPK;YLHNFQGK
0.589371	0.439404	0.498075	0.444227	0.478114	0.50873	0.051967	0.663871	13	13	59.09	O95260	ATE1	Arginyl-tRNA--protein transferase 1	AFWAGGSPSVVDYFPSEDFYR;AIMPYGVYK;ATLLESYQVYK;DPSEEAAVLQYASLVGQK;EEPQELLQSQDFVGEK;FNQDPEAVDEDRSTEPDR;KEEPQELLQSQDFVGEK;LGSGEPSHSVK;LMQQNPAGELEGFQAQGHPPSLFPPK;QQKDPSEEAAVLQYASLVGQK;SLEDLIFESLPENASHK;STEPDRLQVFHK;TLSDDIKESLESEGK
2.63934	2.09592	2.48571	2.20808	2.24838	2.39491	0.247148	1.45872	13	12	27.228	O95292	VAPB	Vesicle-associated membrane protein-associated protein B/C	EAKPEDLMDSK;FMVQSMFAPTDTSDMEAVWK;FRGPFTDVVTTNLK;GPFTDVVTTNLK;IISTTASK;LGNPTDR;LQGEVQR;QFKEEDGLR;SLSSSLDDTEVK;SLSSSLDDTEVKK;TETPIVSK;TVQSNSPISALAPTGK;VEQVLSLEPQHELK
-1.61603	-1.6141	-1.6824	-1.60487	-1.65145	-1.59561	-0.0354805	0.611232	10	10	90.015	O95294	RASAL1	RasGAP-activating-like protein 1	AALGPLGP;AEEDSGGNLGALR;AHEEFQQQER;AVQSIGNLGQQLGQGK;DISGTSDPFAR;DQHADPQTSR;FFAPAILTPK;FPHWDEVLELR;GALSEEQMR;LLEVLADLDR
0.554119	0.263714	0.40548	0.358206	0.265021	0.403042	0.115929	0.855319	7	7	14.874	O95295	SNAPIN	SNARE-associated protein Snapin	AGAGSAAVSGAGTPVAGPTGR;AMLDSGIYPPGSPGK;ESQVELR;LNHSVAK;VALDLDPYVK;VALDLDPYVKK;VVLVNNILQNAQER
-0.218325	-0.421709	-0.319587	-0.47526	-0.332515	-0.308546	0.0936852	0.707702	5	5	29.082	O95297	MPZL1	Myelin protein zero-like protein 1	ISWAGDLDK;ISWAGDLDKK;KSPSDTEGLVK;NPPDIVVQPGHIR;SPSDTEGLVK
2.25703	1.71565	2.05545	1.88964	1.7877	1.9799	0.239154	1.29845	9	9	14.187	O95298;E9PQ53	NDUFC2;NDUFC2-KCTD14	NADH dehydrogenase [ubiquinone] 1 subunit C2;NADH dehydrogenase [ubiquinone] 1 subunit C2, isoform 2	DREMFGYMK;EDYLYAVR;EMFGYMK;FLPDEAR;LHPEDFPEEDKK;LHPEDFPEEDKKTYGEIFEK;REDYLYAVR;RNPEPLR;TYGEIFEK
2.35517	2.03046	2.163	2.08475	2.06482	2.14724	0.133603	0.942318	16	16	40.75	O95299	NDUFA10	NADH dehydrogenase [ubiquinone] 1 alpha subcomplex subunit 10, mitochondrial	FDKGPWLK;GDPHEMK;ITSAYLQDIENAYK;ITSAYLQDIENAYKK;KGDPHEMK;KTFLPEMSEK;KVVEDIEYLK;KYSPGYNTEVGDK;LLQYSDALEHLLTTGQGVVLER;LQSWLYSSR;SNDGNSYR;TFLPEMSEK;VVEDIEYLK;YGMWHFLLGDK;YSPGYNTEVGDK;YSPGYNTEVGDKWIWLK
2.67526	2.08699	2.44779	2.23302	2.23192	2.33459	0.264447	1.52559	16	15	63.083	O95302;Q75LS8	FKBP9	Peptidyl-prolyl cis-trans isomerase FKBP9	DIPGQASLVFDVALLDLHNPK;DSISIENK;DSTFNVFVGK;FDSSYDR;FDSSYDRDSTFNVFVGK;IITIPPFLAYGEDGDGK;ISQSGDFLR;IVVPPHLGYGEEGR;LAPGFDAELIVK;LKDQEAK;LKDQEAKHDEL;NMFTNQDR;TIQVSDFVR;TYDTYVGIGWLIPGMDK;VTAEEFK;YHYVGTFPDGQK
0.051466	-0.197252	-0.10242	-0.166609	-0.1794	-0.0960503	0.105192	0.908021	10	7	54.284	O95319	CELF2	CUGBP Elav-like family member 2	AALEAQNALHNIK;AMAQNAIK;ELFEPYGAVYQINVLR;GPDGLSR;KAALEAQNALHNIK;KLFIGMVSK;LFIGMVSK;MFVGQIPR;SKNDSKPY;SQNPPQSK
2.22233	1.6497	2.08827	1.64545	1.86257	1.95731	0.306807	1.38205	9	9	27.547	O95336	PGLS	6-phosphogluconolactonase	ELPAAVAPAGPASLAR;ILEDQEENPLPAALVQPHTGK;IVAPISDSPKPPPQR;LLTVPFEK;LPIPESQVITINPELPVEEAAEDYAK;LPIPESQVITINPELPVEEAAEDYAKK;LVPFDHAESTYGLYR;TVIFVATGEGK;VTLTLPVLNAAR
-1.61953	-0.89949	-1.45965	-1.02689	-1.0807	-1.31938	-0.339162	1.35972	3	3	69.5	O95340	PAPSS2	Bifunctional 3-phosphoadenosine 5-phosphosulfate synthase 2;Sulfate adenylyltransferase;Adenylyl-sulfate kinase	AEAETLPSLSITK;FVLAHGGR;GFTGIDSDYEKPETPER
-2.45182	-2.47517	-2.53979	-2.52046	-2.49363	-2.5546	-0.0194457	0.127639	5	5	35.486	O95343;O95475	SIX3;SIX6	Homeobox protein SIX3;Homeobox protein SIX6	AVVAFHTGNFR;DLYHILENHK;ELAQATGLTPTQVGNWFK;EWYLQDPYPNPSK;TIWDGEQK
-0.384598	-0.375809	-0.423408	-0.411743	-0.320052	-0.415394	-0.0231063	0.280279	12	12	135.65	O95347	SMC2	Structural maintenance of chromosomes protein 2	ALEEELAGLK;ALNHEIEELEK;AMNVLTEAEER;AQEEVTK;DTSATTALELVAGER;GLVASLISVK;ILTTIEDLDQK;ILTTIEDLDQKK;SIILEGFK;SLEDALAEAQR;SYESQIEVMAAEVAK;TILEEEITPTIQK
1.06146	1.07037	1.02645	1.08078	1.0453	1.04332	-0.0254116	0.551134	17	17	77.959	O95352	ATG7	Ubiquitin-like modifier-activating enzyme ATG7	AAATGDPGLSK;ALAAADR;DVAHSIIFEVK;EGFNFLAK;FDNVLPVSLAFDK;HITFVDNAK;HYSDFFQGQR;ISYSNPVR;LAESSVDLNLK;LVPTLDLDK;LVPTLDLDKVVSVK;MVNLSECMDPK;NFLVLAAHR;SGTALENPVLLNK;VLDQYER;WLPAVIAASK;YDENMVLVSLLK
-3.97528	-3.55786	-3.57577	-3.91154	-3.80922	-3.95841	0.0977243	0.320459	8	5	309.42	O95359	TACC2	Transforming acidic coiled-coil-containing protein 2	ANAEIAQVR;AQQEQAAHQASLR;EQALADLNSVEK;GTYTFDIDKWDDPNFNPFSSTSK;IGTAEVEKPAGLLFQQPDLDSALQIAR;IVAEYEK;KIVAEYEK;TIAQMIEDEQR
-0.20142	-0.211161	-0.410855	-0.173471	-0.28781	-0.331705	-0.0894705	0.422752	10	10	52.356	O95363	FARS2	Phenylalanine--tRNA ligase, mitochondrial	APGSVVELLGK;DGESLQLFEQSSR;DQIDSQHYPIFHQLEAVR;HELFAGIK;LAMILYDIPDIR;LMAHLFGDELEIR;LVEFDLK;SYPQDDHSNLTR;TIGGDLVEK;VDLIDKFVHPK
-2.80971	-2.95177	-3.12396	-3.05583	-2.98989	-3.06185	-0.0105337	0.0288246	3	3	61.438	O95365	ZBTB7A	Zinc finger and BTB domain-containing protein 7A	AGGVDGPIGIPFPDHSSDILSGLNEQR;GVMDYYLK;VIQGAGK
0.818256	0.0986118	0.791139	0.408144	0.332358	0.575504	0.268783	1.04212	4	4	24.737	O95372	LYPLA2	Acyl-protein thioesterase 2	ALIEHEMK;FGALTAEK;IPVTLNMK;SVVTPAR
1.92617	1.76904	1.79561	1.77619	1.75891	1.80061	0.068826	0.756577	22	22	119.52	O95373	IPO7	Importin-7	AFAVGVQQVLLK;AIFQTIQNR;DVPNETLQVEEDDRPELPWWK;ENIVEAIIHSPELIR;ETENDDLTNVIQK;EYNEFAEVFLK;FIQLLSDQSDQSVLIQK;FKSDQNLQTALELTR;FSAPVVPSSFNFGGPAPGMN;GTMDPALR;KQLQDIATLADQR;MDPNTIIEALR;NPVWYQALTHGLNEEQR;QAGVIYLK;QLNEAHK;QLQDIATLADQR;QLQDIATLADQRR;SDQNLQTALELTR;SPLVAAMQHFLPVLK;WALHILAR;WTAIVDK;YGSPGNVSK
-1.49469	-1.55224	-1.54896	-1.57756	-1.53289	-1.58305	0.0230179	0.316848	6	6	57.818	O95376	ARIH2	E3 ubiquitin-protein ligase ARIH2	ADSYDRGDLENQMHIAEQR;GDLENQMHIAEQR;TPEDFVFPLLPNEELR;VQPNPSK;VSHSVAK;YLFYFER
-1.63475	-1.65662	-1.78211	-1.70146	-1.71103	-1.72651	-0.0141805	0.108931	6	6	23.003	O95379	TNFAIP8	Tumor necrosis factor alpha-induced protein 8	EMLHQIIQR;EVATDVFNSK;MHSEAEESKEVATDVFNSK;MLDEENI;NLAVQAQK;SIATTLIDDTSSEVLDELYR
2.79379	2.54482	2.69685	2.6367	2.62396	2.6761	0.0712636	0.764467	21	21	59.851	O95394	PGM3	Phosphoacetylglucosamine mutase	AEHLDHVMFR;AFVELTK;AFVRPSGTEDVVR;ATIEGYYQK;DTRPSSEK;EAVNLQQDAFVVIGR;EMEHYFSQGLSVQLFNDGSK;GLTVQQWDALYTDLPNR;IKQSAEQLEDK;IVYYYHDADGHFHLIDGDK;MDLGAITK;MGLLAVLR;QAVTPPGLQEAINDLVK;QSAEQLEDK;QSAEQLEDKK;SHQKPPQGMEIK;TKAEHLDHVMFR;VISTTDAER;VLIDISEK;VQVADRR;YLEEVMK
-0.817574	-0.77352	-0.752015	-0.673342	-0.753901	-0.844021	-0.0329488	0.245437	8	8	49.669	O95396	MOCS3	Adenylyltransferase and sulfurtransferase MOCS3;Molybdopterin-synthase adenylyltransferase;Molybdopterin-synthase sulfurtransferase	AFSAAASLR;EAIWEEK;ILQSLSAAQELDPLTVR;LASALLAEQEPQPER;LGLVDYDVVEMSNLAR;LVPVSPLPPK;QVLHGEALAGQAK;SLQLLSPEER
0.642197	0.147448	0.449986	0.281204	0.220599	0.393591	0.197811	1.03025	1	1	14.295	O95399	UTS2	Urotensin-2	LTPEELER
0.63994	0.379021	0.54535	0.433443	0.515542	0.486628	0.10136	1.23485	10	10	37.646	O95400	CD2BP2	CD2 antigen cytoplasmic tail-binding protein 2	DSWLDNIDWVK;ERPPGQR;ETVAGALR;GDGLVDVMWEYK;GNLGVYQETR;KLDPPGGQFYNSK;KVTFQGVGDEEDEDEIIVPK;LVDPVAGSGGPGSR;VTFQGVGDEEDEDEIIVPK;YDILASEDVEGQEAATLPSEGGVR
-1.9149	-1.81595	-1.98118	-1.85118	-1.90152	-1.8828	-0.0702648	1.3603	7	7	247.74	O95425	SVIL	Supervillin	APASSLHTQEAGR;ASELATLIQTK;EVTLAQR;FLDWTELKR;GAQVQVLQGK;LTEHNETILFK;YGLTLDPEADSEYLSR
-2.39146	-2.45448	-2.42073	-2.44869	-2.40006	-2.42866	0.0152931	0.376853	5	5	105.81	O95427	PIGN	GPI ethanolamine phosphate transferase 1	DFFHHAR;EVTLPFLFTPFK;GASGDHVYTYSYDAK;LDTWVFDNVK;REDFGAQDATK
-3.74516	-4.2573	-3.80432	-3.99606	-4.06674	-4.01468	0.231602	2.64147	2	2	49.593	O95429	BAG4	BAG family molecular chaperone regulator 4	ELLELDSVETGGQDSVR;IIHVLEK
3.0134	2.6712	2.87215	2.77019	2.7672	2.85304	0.121454	1.03189	14	14	38.274	O95433	AHSA1	Activator of 90 kDa heat shock protein ATPase homolog 1	ADATNVNNWHWTER;AKPAPSK;DASNWSTDK;DASNWSTDKLK;DEPDTNLVALMK;DEPDTNLVALMKEEGVK;EAMGIYISTLK;ETFLTSPEELYR;FHMVDGNVSGEFTDLVPEK;GIPAPEEER;LDGEASINNR;LNWTGTSK;VFTTQELVQAFTHAPATLEADR;YYFEGIK
0.314528	0.252371	0.2524	0.239546	0.255403	0.269978	0.0242348	0.521487	10	10	73.45	O95453	PARN	Poly(A)-specific ribonuclease PARN	DIINNTSLAELEK;EQEELNDAVGFSR;FIDQVVEK;GIHVETLETEK;GIHVETLETEKK;IAVNTSK;LIEPFFNK;VIHAIANSGK;VMDIPYLNLEGPDLQPK;YDYTDSK
-2.65138	-2.733	-2.51983	-2.69136	-2.70652	-2.5386	0.106365	0.590332	4	4	32.854	O95456	PSMG1	Proteasome assembly chaperone 1	AATFFGEVVK;LDLITVEAFKPILSTR;NIPQSTEILK;TSESTGSLPSPFLR
0.799389	0.87731	0.789945	0.87719	0.880582	0.850588	-0.0666917	2.19359	17	17	63.523	O95470	SGPL1	Sphingosine-1-phosphate lyase 1	AASYFGMK;AFEPYLEILEVYSTK;AGYPLEHPFDFR;ALPSQGLSSSAVLEK;ASGTVYSGEEK;AYGDFAWSNPLHPDIFPGLR;ESVTQIMK;GIFVFGNPQLSVIALGSR;GSSLVLYSDK;GSSLVLYSDKK;GVTSISADTHK;KIEAEIVR;LKEYSSMDAFWQEGR;LTELLVK;SELENIK;TPEIVAPQSAHAAFNK;VAIQFLK
-5.49241	-5.81691	-5.48163	-5.67957	-5.75043	-5.5806	0.171345	1.55473	2	2	28.377	O95476	CTDNEP1	CTD nuclear envelope phosphatase 1	DLSVVHSDLSSIVILDNSPGAYR;YDILPLSPVSR
-2.57539	-2.38498	-2.47678	-2.37956	-2.40482	-2.41495	-0.130992	1.88632	1	1	30.065	O95478	NSA2	Ribosome biogenesis protein NSA2 homolog	AQGETEVLK
2.67568	2.39398	2.54343	2.48123	2.42822	2.53442	0.108142	0.956287	30	30	88.892	O95479	H6PD	GDH/6PGL endoplasmic bifunctional protein;Hexose-6-phosphate dehydrogenase;6-phosphogluconolactonase	ALDGLWNR;DAHSVLLSHIFHGR;DIEAQLQHAGLR;EITTLVSR;ELQKPDSFHSLTPTFAAVLVHIDNLR;EMEGPPGLR;ESPLVSAWSEELISK;ETVDAEGR;GHSFSFHGAALTAPK;GSAVVGQYQSYSEQVR;IFYFSVPPFAYEDIAR;IPYYNIHPMPVHLQQR;LANDIEATAVR;LFFSQQQPEQLVPGPGPAPMPSDFQVLR;LFGSPLSDYYAYSPVR;LLDFEFSSGR;LQVFQALR;LYPGGAENGR;MSLSLPLINR;NLFRPSLPSSWK;QAVAQILPFR;QAVAQILPFRDQNR;QGQELMAK;QLVFHIGHGDLGSPAVLVSR;TAEDYQALNK;TAEDYQALNKDIEAQLQHAGLR;TSFYEEYGVIR;VAVLVMGR;…
1.33657	1.06955	1.20179	1.08997	1.06367	1.14884	0.142756	1.26525	20	18	119.75	O95486	SEC24A	Protein transport protein Sec24A	ANFLQNMIEDR;DALVNAVIDSLSAYR;DIHMTPSTDFYK;DLVQLPVVTSSTIVR;ELVQDLLK;EQRPFFPILYVIR;KIGFEAVMR;LMSPTGGR;LPLGLLLHPFK;MSVFQTQLPTLGVGALKPR;SFQTGTNAR;SMTASLSDAR;TIPQPPILQLSVEK;TLETQSALGPALQAAFK;TLPQMFTK;TYINPFVSFLDQR;VDNLSDEGALNISDR;VNDVPEEFLYNPLTR;VVNLLQER;VYGEPHR
1.33631	1.21057	1.193	1.21432	1.17822	1.20949	0.0417633	0.360531	22	20	137.42	O95487	SEC24B	Protein transport protein Sec24B	AEFFQHLIEDR;AKLPLGLLLHPFR;DLLNALPNMFTNTR;DLTQLPVITSNTIVR;ETHSALGPALQAAFK;IVPQPPLQK;KIGFEAVMR;LMSPTGGR;LPLGLLLHPFR;LTDEGAVHVNDR;MIHPNLYR;MTHLPELDTLSSER;SAPAGSSHPAASAR;SFITWLR;SQPLVHLMK;SSPVVSTVLSGSSGSSSTR;SVSSSLSDAR;SYGEPHK;TPPTANHPVEPVTSVTQPSELLQQK;VNDVPEEFMYNPLTR;VSVFQTQLPSLGAGLLQSR;VVQHLGPATDFYK
-5.05946	-4.97686	-4.97692	-4.99082	-4.88162	-4.80087	-0.0801185	0.453128	2	2	163.35	O95490	ADGRL2	Adhesion G protein-coupled receptor L2	AIVDTVDNLLRPEALESWK;FEATWETVYDK
-4.61316	-4.88213	-4.54777	-4.68726	-4.64264	-4.70723	0.0522563	0.41529	2	2	43.898	O95503	CBX6	Chromobox protein homolog 6	LIAAFEQK;VFAAESIIK
-2.62337	-2.08897	-2.48535	-2.11127	-2.31811	-2.45939	-0.269202	1.15903	3	3	56.911	O95528	SLC2A10	Solute carrier family 2, facilitated glucose transporter member 10	DLIPLQGGEAPK;GQSLAEIDQQFQK;YSFLDLFR
-2.91743	-2.84272	-2.85684	-2.90877	-2.84148	-2.86753	-0.00970459	0.133908	3	3	40.929	O95551	TDP2	Tyrosyl-DNA phosphodiesterase 2	AAAEEGHIIPR;ALNSYFEPPVEESALER;SLDLLGLEK
-1.48321	-1.40035	-1.51002	-1.44311	-1.4813	-1.4852	-0.0260003	0.771986	1	1	17.779	O95562	SFT2D2	Vesicle transport protein SFT2B	VLSGQDTEDR
-1.21751	-1.56299	-1.34291	-1.46847	-1.53945	-1.40103	0.166955	1.33689	4	4	14.279	O95563	MPC2	Mitochondrial pyruvate carrier 2	LLDKVELMLPEK;LRPLYNHPAGPR;TVFFWAPIMK;YSLVIIPK
0.0780373	-0.148396	-0.0669928	-0.0211964	-0.0899477	-0.0730953	0.0640335	0.614452	5	5	27.873	O95571	ETHE1	Persulfide dioxygenase ETHE1, mitochondrial	EAVLIDPVLETAPR;GGSGAPILLR;IMGNLNLPKPQQIDFAVPANMR;LSGAQADLHIEDGDSIR;TLYHSVHEK
1.5282	1.51229	1.44232	1.49449	1.52988	1.4919	-0.0299797	0.438034	18	17	80.419	O95573	ACSL3	Fatty acid CoA ligase Acsl3	ADFFEDENGQR;AKPVNSKPDSAYR;ELTELAR;EVLNEEDEVQPNGK;GDTSMLKPTLMAAVPEIMDR;GEILIGGQSVTMGYYK;GIIVHTMAAVEALGAK;GVMISHSNIIAGITGMAER;HIITVDGKPPTWSEFPK;IGYSSPQTLADQSSK;LSPEPWTPETGLVTDAFK;MNNHVSSKPSTMK;NLFILAYNYK;NWEEGGYFNTDKPHPR;SLLGGNIR;THYQADIER;VLSEAAISASLEK;VSEMSSFQR
0.28619	0.329332	0.234847	0.321115	0.272887	0.275816	-0.0276216	0.568395	23	23	194.81	O95602	POLR1A	DNA-directed RNA polymerase I subunit RPA1	AALNLPEAASYDEVR;AYNADFDGDEMNAHFPQSELGR;DLDNAGELGR;DSDGSVVQFLYGEDGLDIPK;DSEPLGIEEAQIGK;EHLSALWK;EHYMELVYR;EIKDVFAVYGIAVDPR;ELVLNTEGINLPELFK;FQFLPHAYYQQEK;GAFLSYSQK;GFTLGVEDILVKPK;GYLTPTSAR;KTQEQDEEVGLGTEEDPSLPALLTQPR;LIALFWK;LLMESIK;LPEEVATPTTDEEKDSLIAIDR;LTITFPAMVHR;LTYPQPVTPWNVQELR;SFLSTLPGQSLIDK;SQHLHEVLSR;VDDYSQEWAAQTEK;VLEVGALQAVYELER
-5.87842	-5.66818	-5.87745	-5.66754	-5.77739	-5.86707	-0.0671301	0.404954	6	6	378.03	O95613	PCNT	Pericentrin	ADVNLSHSER;ALEQQPLAAGAAPPELQWLR;GDLLQVVQEAFEK;GQALQGELEAALEAK;IQEFEAALK;VVDLQAMLEK
-0.826641	-0.786638	-0.879148	-0.864843	-0.849507	-0.810951	-0.0247154	0.40431	2	2	26.499	O95619	YEATS4	YEATS domain-containing protein 4	GVTIVKPIVYGNVAR;KLEEDDQAKDI
-1.83272	-1.84314	-1.78221	-1.84426	-1.79762	-1.74801	0.000851949	0.00836613	9	8	63.509	O95628	CNOT4	CCR4-NOT transcription complex subunit 4	ASLGTTK;HQEYEQK;KPYPEDPAVYKPLSQEELQR;LADPEVLK;LLQELYK;LNPNFLQLSTGSVDK;RPEYFGK;SPFEGAVTESQSLFSDNFR
0.912024	0.715776	0.784888	0.690346	0.817203	0.787903	0.0564823	0.402274	11	11	48.076	O95630	STAMBP	STAM-binding protein	AEELKAELLK;AVTITDLR;EAEELAR;EYTEYNEEK;FQETGFFK;GFHPHSK;HVVVPGR;IVQEFGK;QQQLEQEQFHAFEEMIR;SAVIPEKK;SLKPGALSNSESIPTIDGLR
-3.73995	-2.4934	-3.36558	-2.72382	-2.94731	-3.1113	-0.579007	1.62789	1	1	30.255	O95639	CPSF4	Cleavage and polyadenylation specificity factor subunit 4	MQEIIASVDHIK
2.75663	2.71796	2.68095	2.63343	2.73809	2.70777	0.0208041	0.210458	21	21	68.856	O95671	ASMTL	Probable bifunctional dTTP/UTP pyrophosphatase/methyltransferase protein;dTTP/UTP pyrophosphatase;N-acetylserotonin O-methyltransferase-like protein	AADIASK;AEAGEAGQATAEAECHR;AEDLFQDAYYQSPETR;ALEVANR;ALMQSLNMLVQTEGK;AMHGMTK;APDVVIGADTIVTVGGLILEKPVDK;ASFATPYGYAMETAK;DAGSRDEK;DHQLDTR;ETLPPFPTR;FSELSEELLWEYVHSGEPMDK;HDSIPAADTFEDLSDVEGGGSEPTQR;ILHDWPDDK;ILHDWPDDKVHK;KAEDLFQDAYYQSPETR;LYYPPRPEDLR;RQEILSNAGLR;VFDLLKDEAPQK;VSEFYEETK;VVLASASPR
1.60812	1.29896	1.39606	1.31734	1.23178	1.38045	0.161168	0.929462	7	7	51.417	O95674	CDS2	Phosphatidate cytidylyltransferase 2	AESAPLPVSADDTPEVLNR;ALSNLSSR;GMLTSTTEDE;VAHEPVAPPEDK;VAHEPVAPPEDKESESEAK;VAHEPVAPPEDKESESEAKVDGETASDSESR;VDGETASDSESR
-3.4837	-3.06511	-3.24971	-3.11169	-3.04793	-3.12747	-0.250834	1.54967	3	3	32.559	O95685	PPP1R3D	Protein phosphatase 1 regulatory subunit 3D	FADALGLELAQVK;GPSSAVLPSALGSR;STHEAVAR
-4.10051	-4.40908	-4.16502	-4.28944	-4.45706	-4.20446	0.18914	1.16011	3	3	119.52	O95696	BRD1	Bromodomain-containing protein 1	EVPDYLDHIK;LLIELLR;LTPLTVLLR
-1.85098	-2.13423	-2.0339	-2.12006	-2.08521	-2.03131	0.110624	0.796134	6	6	25.424	O95707	POP4	Ribonuclease P protein subunit p29	ADLHGAIISVTK;AVVLEYFTR;KAVVLEYFTR;LFDIKPEQQR;SVIYHALSQK;YSLFLPLHELWK
-1.44958	-1.14451	-1.35897	-1.19071	-1.21603	-1.28675	-0.174117	1.9587	9	9	527.22	O95714	HERC2	E3 ubiquitin-protein ligase HERC2	AAGPEPQALDEFTSLLIADDTR;ALLSHQDK;KPTLVQGLEGQK;LEIFPDVLVHR;LGHGDTVPLEEPK;LHEFDEQVAAVR;LVEALQGHR;SILDSWVWGK;VVVDLLK
-1.90683	-2.0774	-2.12201	-2.05381	-2.08374	-2.0825	0.0345414	0.196863	6	4	24.267	O95716	RAB3D	Ras-related protein Rab-3D	DAADQNFDYMFK;LADDLGFEFFEASAK;LLLIGNSSVGK;TITTAYYR;VVPAEDGRR;YADDSFTPAFVSTVGIDFK
0.44397	0.238171	0.394702	0.195425	0.358018	0.362051	0.135396	1.0508	11	11	28.97	O95721	SNAP29	Synaptosomal-associated protein 29	EAISTSK;GAGSAMSTDAYPK;IDSNLDELSMGLGR;KLDDTDPVPR;LKEAISTSK;RAEATAASTSR;SLALMYESEK;SVFGGLVNYFK;SYNPFDDDGEDEGARPAPWR;VGVASSEELAR;YQASHPNLR
1.9018	1.54244	1.71086	1.52654	1.6404	1.70172	0.161903	0.968125	20	18	58.022	O95747	OXSR1	Serine/threonine-protein kinase OSR1	AAISQLR;DELWLVMK;DLVIVAANLQK;DPEKRPTAAELLR;DTAEGVSQELISAGLVDGR;ELNDIRFEFTPGR;EVLEGLEYLHK;FEFTPGRDTAEGVSQELISAGLVDGR;IPISLVLR;IVEEPQSNR;LASGVEGSDIPDDGK;LASGVEGSDIPDDGKLIGFAQLSIS;LLSGGSVLDIIK;NKEFLQEK;RPTAAELLR;RVPGSSGR;SEDSSALPWSINR;SGVLDESTIATILR;TAQALSSGSGSQETK;VLMLTLQNDPPSLETGVQDK
0.15959	-0.148874	0.0465975	-0.0209122	-0.0488062	0.00878716	0.105289	1.21123	7	7	34.87	O95749	GGPS1	Geranylgeranyl pyrophosphate synthase	GGNPELVALVK;ILLEPYK;LSQAFNHWLK;QLLELHQGQGLDIYWR;TQETVQR;VLTLDHPDAVK;YLLQLPGK
2.05219	1.82298	1.88957	1.87409	1.86384	1.93233	0.0609703	0.479307	25	22	94.511	O95757	HSPA4L	Heat shock 70 kDa protein 4L	AEVPEDKPK;AIGNAAK;AVMEQANLQR;DISTTLNADEAVAR;DSSQHTK;EDISSIEIVGGATR;EFSITDLVPYSITLR;EPFELEAFYTNLHEVPYPDAR;ETSENALK;FITPEDLSK;IGSFTIQNVFPQSDGDSSK;KEPFELEAFYTNLHEVPYPDAR;LGTVYEK;LKETSENALK;LMNETTAVALAYGIYK;LPYELQK;LSLTQDPVVK;MIMQDKLEK;MQVDQEEGHQK;QLGQDLLNSYIENEGK;SFDDPIVQTER;VLATTFDPYLGGR;YDHLDPTEMEK;YLEEERPFAIEQVTGMLLAK;YMEHEERPK
-3.15494	-2.57097	-3.20157	-2.8464	-2.7241	-2.95611	-0.295324	1.68572	8	5	59.689	O95758	PTBP3	Polypyrimidine tract-binding protein 3	AQAALQAVSAVQSGSLALSGGPSNEGTVLPGQSPVLR;DFSNSPLHR;EGQEDQGLTK;ELKTDNLPNQAR;HQAVQLPR;LTSLNVK;SQPVYIQYSNHR;VTNLLMLK
-2.5953	-2.6194	-2.60601	-2.64111	-2.66761	-2.6279	0.0803789	1.00578	2	2	30.759	O95760	IL33	Interleukin-33;Interleukin-33 (95-270);Interleukin-33 (99-270);Interleukin-33 (109-270)	DFWLHANNK;EHSVELHK
0.621668	0.429102	0.534232	0.431887	0.508189	0.460047	0.102565	1.37715	6	6	10.403	O95777	LSM8	U6 snRNA-associated Sm-like protein LSm8	AEPLNSVAH;GDNVAVIGEIDEETDSALDLGNIR;GFDQTINLILDESHER;MIVGTLK;TSALENYINR;TVAVITSDGR
3.92102	3.69021	3.80366	3.77257	3.69466	3.78546	0.0948798	0.940383	43	30	107.54	O95782	AP2A1	AP-2 complex subunit alpha-1	ALDGYSK;ALLLSTYIK;ANHPMDAEVTK;ASPDLVPMGEWTAR;ATIQGVLR;DDVQGYAAK;DFLTPPLLSVR;DPSSNDINGGMEPTPSTVSTPSPSADLLGLR;EMGEAFAADIPR;ESSILAK;FFQPTEMAAQDFFQR;FHLCSVATR;FINLFPETK;GLAVFISDIR;GPGAGSALDDGR;GPGAGSALDDGRR;HLCELLAQQF;IAGDYVSEEVWYR;ILVAGDSMDSVK;INKELANIR;KGPGAGSALDDGR;KGPGAGSALDDGRR;KNPDDFK;KVQHSNAK;LEPNAQAQMYR;LINNAIK;LPVTINK;MYLFYGNK;NADVELQQR;QIVSEMLR;QLSLPQQEAQK;SSPPVQFSLLHSK;THIDTVINALK;TSVQFQNF…
-1.72418	-1.47027	-1.70921	-1.51699	-1.5518	-1.64439	-0.154428	1.76819	8	8	178.67	O95785	WIZ	Protein Wiz	AADGGERPLAASPPGTVK;ADPPPEESQAPQAQTAAAEAP;FVGNIYTLK;GGEDTNDLQQK;GLPDAHLGLPPGLAK;QLGVAESESSGAPIDLLYELVK;RPLQEDR;TYIQTELPFK
-2.34715	-2.38442	-2.40368	-2.37369	-2.21443	-2.38263	-0.0316029	0.201322	12	12	106.6	O95786	RIGI	Antiviral innate immune response receptor RIG-I	AAGFDEIEQDLTQR;AAGFDEIEQDLTQRFEEK;ALFLYTSHLR;ALVDALK;GPMEAATLFLK;IESFVVEDIATGVQTLYSK;ILHIQTHEK;IPFDPAEMSK;LQTWDEAVFR;LSFLKPGILTGR;TFEIPVIK;WKDFHFEK
1.70856	1.49977	1.59663	1.56592	1.51841	1.57846	0.0831076	0.970155	24	21	63.182	O95793	STAU1	Double-stranded RNA-binding protein Staufen homolog 1	AAPNPAK;EFVMQVK;EKEPEYTLLTER;ELLYGGTSPTAETILK;EPEYTLLTER;ESEEENLNK;ESEEENLNKSEISQVFEIALK;ESGPPHMK;ILQNEPLPER;KEKEPEYTLLTER;KNAAIAVLEELK;LAQIQQAK;LLSELDQQSTEMPR;LPPLPAVER;NAAENMLEILGFK;NAAIAVLEELK;NAAIAVLEELKK;NLPVNFEVAR;SEISQVFEIALK;SEISQVFEIALKR;TKPIVKPQTSPEYGQGINPISR;VPQAQPTKPALK;VQGFQVEYK;VSVGEFVGEGEGK
-1.44447	-1.68312	-1.69537	-1.64718	-1.62708	-1.70568	0.0179087	0.0591094	2	2	44.678	O95801	TTC4	Tetratricopeptide repeat protein 4	AVISYTEGLK;STLLQVLQHQR
-4.17685	-4.29414	-4.13163	-4.07978	-4.41037	-4.27088	0.0912787	0.397734	1	1	17.4	O95807	TMEM50A	Transmembrane protein 50A	SGFLEGLR
-1.74493	-1.80186	-1.78696	-1.66433	-1.82112	-1.75103	-0.0183029	0.14463	6	6	47.173	O95810	CAVIN2	Caveolae-associated protein 2	DNSQVNAVTVLTLLDK;GEDAAQAEK;GIQNDLTK;LVNMLDAVQENQHK;VLIFQEENEIPASVFVK;YQASTSNTVSK
1.93409	1.65142	1.9124	1.7945	1.7303	1.84662	0.135757	1.77518	11	11	23.772	O95816	BAG2	BAG family molecular chaperone regulator 2	EAATAVEQEK;EILLEMIHSIQNSQDMR;FLDDLGNAK;IIDEVVNK;LLESLDQLELR;NIENSDK;NPQQQESLK;QISDGER;QISDGEREELNLTANR;RLETLLR;TLQQNAESR
1.50205	1.28115	1.38417	1.33864	1.32654	1.32055	0.0947831	1.12272	20	20	61.594	O95817	BAG3	BAG family molecular chaperone regulator 3	AAPSTAPAEATPPKPGEAEAPPK;AIDVPGQVQVYELQPSNLEADQPLQAIMEMGAVAADK;EGHPVYPQLRPGYIPIPVLHEGAENR;ELLALDSVDPEGR;ETAPVSQPENKPESKPGPVGPELPPGHIPIQVIR;GMPETTQPDK;GYISIPVIHEQNVTRPAAQPSFHQAQK;IDPQTGWPFFVDHNSR;IQGDDWEPRPLR;QVHPFHVYPQPGMQR;SSLGSHQLPR;SSTPLHSPSPIR;SSVQGASSR;SVATEER;VEAILEK;VHTVVDRPQQPMTHR;VQGLEQAVDNFEGK;VQGLEQAVDNFEGKK;VQTILEK;YLMIEEYLTK
0.501055	0.332308	0.342811	0.346434	0.330865	0.353525	0.054526	0.452142	15	8	142.1	O95819	MAP4K4	Mitogen-activated protein kinase kinase kinase kinase 4	AHYEPADR;ALFLIPR;AVEDVRPPHK;DVVLQWGEMPTSVAYIR;EQEEYKR;EVFRPLKPADLTALAK;GQNVLLTENAEVK;ILHNDPEVEK;IQLKDHIDR;KFFSFIEGCLVK;KGSVVNVNPTNTRPQSDTPEIR;NIATYYGAFIK;QQLLQEQQLR;SVETGHLDGVFMHK;TGQLAAIK
1.29072	1.38875	1.27201	1.37364	1.34951	1.30855	-0.0655829	1.51643	16	15	55.003	O95822	MLYCD	Malonyl-CoA decarboxylase, mitochondrial	ADLLEAQALK;ALQTPLMR;AMDELLR;ASEQVLSLVAQFQK;AVPPTPAYELR;EAAVLLQAEDR;EFPHLGVFSSLSPIPGFTK;EHPPSETEEK;EISEITGGPINETLK;GFGVDHGQVAEQSAGVLHLR;GLFHHISK;ISEAEAVHPVK;LLLSSSEWVQSEK;LVEGPDVR;WLLGLLNSQTK;YFLEETGPNSTSYLGSK
0.645609	0.37361	0.534272	0.350201	0.439244	0.50396	0.138849	1.11689	11	11	38.696	O95825	CRYZL1	Quinone oxidoreductase-like protein 1	AYTALHYLSHLSPGK;DLFPVGR;EDLPVTEDNFVK;EIAGIVLDVGSK;FRPPIAR;GATLAFLNDEVWNLSNVQQGK;LQLLPHK;LSTGVFRPQLDEPIPLYEAK;LYSKDDEPAVK;VSMEAVQK;VTWTEAAGSIR
3.56634	3.39683	3.47044	3.41997	3.42628	3.47066	0.0651131	0.865181	29	29	66.9	O95831	AIFM1	Apoptosis-inducing factor 1, mitochondrial	AALSASEGEEVPQDK;AALSASEGEEVPQDKAPSHVPFLLIGGGTAAFAAAR;ALGTEVIQLFPEK;APSHVPFLLIGGGTAAFAAAR;ATAQDNPK;DGEQHEDLNEVAK;ELWFSDDPNVTK;GVIFYLR;IIKDGEQHEDLNEVAK;ILPEYLSNWTMEK;ISGLGLTPEQK;KAALSASEGEEVPQDK;KAALSASEGEEVPQDKAPSHVPFLLIGGGTAAFAAAR;KVETDHIVAAVGLEPNVELAK;KVVQLDVR;LFNIHED;LNDGSQITYEK;RVEHHDHAVVSGR;SATEQSGTGIR;SESETESEASEITIPPSTPAVPQAPVQGEDYGK;SLSAIDR;SNIWVAGDAACFYDIK;TGGLEIDSDFGGFR;VEHHDHAVVSGR;VETD…
-1.67561	-0.455252	-1.07775	-0.524582	-0.685008	-0.961439	-0.606415	1.29422	2	2	26.648	O95833	CLIC3	Chloride intracellular channel protein 3	APLEHELAGEPQLR;ESNTAGNDVFHK
2.01228	1.76447	1.85602	1.82038	1.82397	1.85382	0.0700124	0.554	18	17	70.678	O95834	EML2	Echinoderm microtubule-associated protein-like 2	DGTLVSGGGR;DTSVLQWR;EGKPLPPHVR;EVIFSVEDGSVK;GRPVPMMIPDELAPTYSLDTR;HYLGHNDDIK;IIEDPAR;LEWVYGYR;LLASADDFGK;LQEVEVPEDFGPVR;LVHLWSSDSHQPLWSR;QITSADAVR;SAGFHPSGSVLAVGTVTGR;SHIYFWTLEGGSLSK;SSFGAGK;TKEVIFSVEDGSVK;TVAEGHGDTLYVGTTR;VVLWGSDYSK
-0.0447693	-0.0157928	-0.060647	-0.00461388	0.00797749	-0.0148621	-0.0677401	1.52521	9	5	41.57	O95837	GNA14	Guanine nucleotide-binding protein subunit alpha-14	EQVEAIK;EYQLSDSAK;FVFAAVK;IATPSFVPTQQDVLR;IIHGSGYSDEDRK;LLLLGTGESGK;LYQDQNPDKEK;MVDVGGQR;YYLTDIDR
0.787785	0.754026	0.717267	0.753933	0.685195	0.706923	0.0186939	0.212262	6	6	24.118	O95848	NUDT14	Uridine diphosphate glucose pyrophosphatase NUDT14	IEGASVGR;QFRPAVYAGEVER;QTMFYTEVTDAQR;RFPGSLAAVDQDGPR;THDSVTVLLFNSSR;VATYWSGVGLTGSR
-3.84717	-3.71504	-3.91198	-3.72206	-3.89996	-3.87624	-0.0246394	0.145638	1	1	33.165	O95858	TSPAN15	Tetraspanin-15	GIENYYDDLDFK
2.01552	1.77234	1.85692	1.82701	1.84771	1.84881	0.0733363	0.64772	13	13	33.392	O95861	BPNT1	3(2),5-bisphosphate nucleotidase 1	AIAGVINQPYYNYEAGPDAVLGR;ASAYVFASPGCK;ASSNTVLMR;HIITTTR;HMNSAGVLATLR;IIQLIEGK;LTDIHGNVLQYHK;LVASAYSIAQK;NYDYYASR;QPCPSQYSAIKEEDLVVWVDPLDGTK;RVIAEGDLGIVEK;VGGAGNK;VIAEGDLGIVEK
1.06085	1.2359	1.05417	1.20987	1.16725	1.11353	-0.105265	1.70631	15	14	52.259	O95864	FADS2	Acyl-CoA 6-desaturase	AFHPDLEFVGK;ALLDIIR;EVSVPTFSWEEIQK;FLKPLLIGELAPEEPSQDHGK;FVIGHLK;GASANWWNHR;GGNQGEGAAER;GKGGNQGEGAAER;HGIEYQEKPLLR;KVYNITK;LWLDAYLHK;VIGHYAGEDATDAFR;WLVIDRK;WNHLVHK;WSIQHPGGQR
1.82582	1.67611	1.83738	1.65178	1.7847	1.72526	0.0990626	1.15319	14	13	29.644	O95865	DDAH2	Putative hydrolase DDAH2	ALQDLGLR;DFAVSTVPVSGPSHLR;EFFVGLSK;EHGVLGGK;GAEIVADTFR;GAEIVADTFRDFAVSTVPVSGPSHLR;GGGDLPNSQEALQK;GVPESLASGEGAGAGLPALDLAK;IVEIGDENATLDGTDVLFTGR;KALQDLGLR;LSDVTLVPVSCSELEK;RPEVDGVR;RPEVDGVRK;TVVAGSSDAAQK
1.84992	1.93238	1.83479	1.92414	1.8897	1.8629	-0.0639788	1.30024	17	17	63.243	O95870	ABHD16A	Phosphatidylserine lipase ABHD16A	ALMPVLLQGQAR;APASVPETPTAVTAPHSSSWDTYYQPR;DEIITTTVPEDIMSNR;GNDLLLK;GTADTLLNR;GTAEPQGQK;GVALLRPEPLHR;MLYPGSVYLLQK;QFITILEATHR;QLANYNFDFR;QWLEASSQLEEASIYSR;RGTAEPQGQK;SWPVDFHWEEPSSR;SYQAEHGPDFPWSVGEDMSADGR;TKDEIITTTVPEDIMSNR;VMAEEGLR;YQGPVLLIR
0.857397	0.294586	0.703721	0.409695	0.499158	0.573219	0.263615	1.73143	7	7	19.206	O95881	TXNDC12	Thioredoxin domain-containing protein 12	EAAASGLPLMVIIHK;GFGDHIHWR;ILFLDPSGK;LTGDAFR;TLEDGKK;VHPEIINENGNPSYK;YFYVSAEQVVQGMK
-0.718546	-0.501059	-0.702779	-0.834793	-0.423825	-0.637453	-0.0592696	0.188345	2	2	52.318	O95907	SLC16A8	Monocarboxylate transporter 3	AGDAPGEAEADGAGLQLR;GEPTEPEIEARPR
-2.83889	-2.99801	-2.95724	-3.00091	-2.93931	-2.99882	0.0671908	0.728721	4	4	28.722	O95926	SYF2	Pre-mRNA-splicing factor SYF2	KNPDLGFSDYAAAQLR;LEWELKEEEK;LKLPANWEAK;LLEISAEDAER
-0.631634	-0.655159	-0.741208	-0.670202	-0.653741	-0.669834	-0.0326881	0.409733	5	4	32.844	O95983	MBD3	Methyl-CpG-binding domain protein 3	GKPDLNTALPVR;KLSGLNAFDIAEELVK;KQEELVQQVR;LSGLNAFDIAEELVK;QTASIFK
0.674669	0.487309	0.531461	0.522663	0.54169	0.567024	0.0469208	0.448371	5	5	19.471	O95989	NUDT3	Diphosphoinositol polyphosphate phosphohydrolase 1	LVGIFENQER;SESEEEVLLVSSSR;TYDGDGYK;VLQYHKPVQASYFETLR;WIVPGGGMEPEEEPSVAAVR
-0.287994	-0.28656	-0.343608	-0.302982	-0.366267	-0.331644	-0.0145334	0.13205	5	5	17.455	O95990	FAM107A	Actin-associated protein FAM107A	ADIGGLMARPEYR;ELLMNHR;EWNPELIKPK;GLGVDSKPELQR;KLLNPVK
-0.983103	-0.798674	-0.864219	-0.972094	-0.629483	-0.839249	-0.0853469	0.323459	6	6	26.251	O95999	BCL10	B-cell lymphoma/leukemia 10	DALENLR;EKTQNFLIQK;GLDTLVESIR;GLDTLVESIRR;LLDYLQENPK;MEPTAPSLTEEDLTEVK
1.88256	1.58531	1.71867	1.61294	1.67959	1.73016	0.110198	0.846741	9	9	20.776	O96000	NDUFB10	NADH dehydrogenase [ubiquinone] 1 beta subcomplex subunit 10	AFDLIVDRPVTLVR;DYKVDQEIINIMQDR;EAAAATS;EVEQFTQVAK;PDSWDKDVYPEPPR;PDSWDKDVYPEPPRR;TPVQPNPIVYMMK;VDQEIINIMQDR;YQDLGAYSSAR
1.45709	1.34355	1.37244	1.36966	1.3589	1.38165	0.029707	0.43226	14	14	76.096	O96005	CLPTM1	Putative lipid scramblase CLPTM1	EEASTSLPTKPTQGASSASEPQEAPPKPAEDK;GPAPQDQAGPGGAPR;GSVPPPLDQYVK;LATVHMSR;NLLTGETEADPEMIK;NLLTGETEADPEMIKR;QSLEGLSVR;RGPAPQDQAGPGGAPR;SGFHPDPR;SPWNFLGDELYEQSDEEQDSVK;STYIESSTK;SVAHLPWR;VNEFGMSGEDPTAAAPVAEVPTAAGALTPTPAPTTTTATR;WQLYAAQSTK
-1.36236	-1.12799	-1.39863	-1.27898	-1.1402	-1.25763	-0.149761	1.54452	5	5	20.944	O96007	MOCS2	Molybdopterin synthase catalytic subunit	AASLEAVSYAIDTLK;EIYEESSTWK;LPLSPPLVEDSAFEPSR;LPLSPPLVEDSAFEPSRK;SKDVINFTAEK
1.82969	1.70476	1.76791	1.80037	1.73864	1.76805	0.0192623	0.284233	9	9	37.893	O96008	TOMM40	Mitochondrial import receptor subunit TOM40 homolog	ASDQLQVGVEFEASTR;ELFPIQMEGVK;FVNWQVDGEYR;GSVDSNWIVGATLEK;KLPPLPLTLALGAFLNHR;MAIQTQQSK;MQDTSVSFGYQLDLPK;QLSPTEAFPVLVGDMDNSGSLNAQVIHQLGPGLR;RPGEEGTVMSLAGK
0.0226173	0.0290108	-0.0158339	-0.0451775	0.0303907	-0.00600624	-0.00419362	0.0506163	8	8	28.431	O96011	PEX11B	Peroxisomal membrane protein 11B	AVHLSDVVLR;DAWVRFSAQSQAR;FSAQSQAR;GHPPLLLDVVR;GSGGGVPGGSETGGLGGPGTPGGGLPQLALK;HGASPELQK;LGNSADALESAK;LQVLLLAR
1.08832	1.09991	1.09704	1.12577	1.15942	1.13762	-0.0467885	1.98328	17	17	64.071	O96013;Q9P286	PAK4	Serine/threonine-protein kinase PAK 4	ADTDHPSR;AGPPASIVPLMR;ATAAELLK;DGALTLLLDEFENMSVTR;DKRPLSGPDVGTPQPAGLASGAK;EGSGGPQESSR;FAGHSEAGGGSGDR;GAQGEPHDVAPNGPSAGGLAIPQSSSSSSRPPTR;LLVRDPAQR;QWQSLIEESAR;RVEISAPSNFEHR;SDSILLTHDGR;SPQREPQR;SYLDNFIK;VEISAPSNFEHR;VHTGFDQHEQK;VSHEQFR
1.95974	1.75076	1.81904	1.76708	1.75539	1.81286	0.0904338	0.862433	13	13	47.46	O96019;O94805	ACTL6A	Actin-like protein 6A	DDGSTLMEIDGDKGK;EGSPANWK;ELFQEMNIELVPPYMIASK;ENMEAISPLK;IPEGLFDPSNVK;LIANNTTVER;LKIPEGLFDPSNVK;QEYEEGGK;QGGPTYYIDTNALR;SEASLHPVLMSEAPWNTR;SGGVYGGDEVGALVFDIGSYTVR;STGLILDSGATHTTAIPVHDGYVLQQGIVK;VDFPTAIGMVVER
-1.78688	-2.08082	-1.76492	-2.05257	-1.97958	-1.85061	0.175404	1.36224	2	2	42.717	P00156	MT-CYB	Cytochrome b	DVNYGWIIR;KTNPLMK
1.00606	0.800684	1.01198	0.614107	0.982953	0.902081	0.188648	0.771225	6	6	15.33	P00167	CYB5A	Cytochrome b5	AEQSDEAVK;EQAGGDATENFEDVGHSTDAR;FLEEHPGGEEVLR;STWLILHHK;TFIIGELHPDDRPK;YYTLEEIQK
5.10612	4.91869	4.97579	4.96772	4.93206	5.02702	0.0410614	0.319619	24	23	36.688	P00338	LDHA	L-lactate dehydrogenase A chain	ATLKDQLIYNLLK;ATLKDQLIYNLLKEEQTPQNK;DLADELALVDVIEDK;DLADELALVDVIEDKLK;DQLIYNLLK;DQLIYNLLKEEQTPQNK;DYNVTANSK;EEQTPQNK;EVHKQVVESAYEVIK;FIIPNVVK;GEMMDLQHGSLFLR;IVSGKDYNVTANSK;KSADTLWGIQK;LKGEMMDLQHGSLFLR;LVIITAGAR;QVVESAYEVIK;RVHPVSTMIK;SADTLWGIQK;TLHPDLGTDK;TLHPDLGTDKDK;TLHPDLGTDKDKEQWK;VHPVSTMIK;VIGSGCNLDSAR;VTLTSEEEAR
5.63852	5.32431	5.5219	5.40079	5.41979	5.50283	0.109133	0.929529	34	30	54.861	P00352	ALDH1A1	Aldehyde dehydrogenase 1A1	ANNTFYGLSAGVFTK;EAGFPPGVVNIVPGYGPTAGAAISSHMDIDK;EEIFGPVQQIMK;ELGEYGFHEYTEVK;FPVFNPATEEELCQVEEGDKEDVDK;GYFVQPTVFSNVTDEMR;IAKEEIFGPVQQIMK;IFINNEWHDSVSGK;IFINNEWHDSVSGKK;IFVEESIYDEFVR;IFVEESIYDEFVRR;ILDLIESGK;ILDLIESGKK;KFPVFNPATEEELCQVEEGDKEDVDK;KYILGNPLTPGVTQGPQIDK;KYILGNPLTPGVTQGPQIDKEQYDK;LADLIER;LADLIERDR;LECGGGPWGNK;LLLATMESMNGGK;LYSNAYLNDLAGCIK;QAFQIGSPWR;RANNTFYGLSAGVFTK;RVTLELGGK;SLDDVIK;SL…
4.14497	3.91933	4.01556	3.93591	3.99311	4.01744	0.0746174	0.673226	29	11	61.397	P00367	GLUD1	Glutamate dehydrogenase 1, mitochondrial	AKPYEGSILEADCDILIPAASEK;ALASLMTYK;DDGSWEVIEGYR;DIVHSGLAYTMER;DSNYHLLMSVQESLER;ELEDFKLQHGSILGFPK;ESEEQKR;FTMELAK;GASIVEDK;GASIVEDKLVEDLR;GFIGPGIDVPAPDMSTGER;HGGTIPIVPTAEFQDR;IIAEGANGPTTPEADK;IIAEGANGPTTPEADKIFLER;IIKPCNHVLSLSFPIR;ISGASEKDIVHSGLAYTMER;KGFIGPGIDVPAPDMSTGER;LQHGSILGFPK;LTFKYER;MVEGFFDR;NLNHVSYGR;NYTDNELEK;RDDGSWEVIEGYR;RFTMELAK;TAAYVNAIEK;TFVVQGFGNVGLHSMR;VYNEAGVTFT;YNLGLDLR;YSTDVSVD…
-1.03272	-1.25027	-1.14762	-1.12969	-1.14067	-1.18063	0.0384947	0.380228	3	3	21.452	P00374;Q86XF0	DHFR	Dihydrofolate reductase	EAMNHPGHLK;LLPEYPGVLSDVQEEK;SLDDALK
3.23292	3.118	3.16697	3.18	3.13443	3.20359	0.0279814	0.429819	18	18	34.234	P00387	CYB5R3	NADH-cytochrome b5 reductase 3	APEAWDYGQGFVNEEMIR;DILLRPELEELR;EIISHDTR;EIISHDTRR;FAIRPDK;FALPSPQHILGLPVGQHIYLSAR;GFVDLVIK;GPSGLLVYQGK;IDGNLVVRPYTPISSDDDK;IDGNLVVRPYTPISSDDDKGFVDLVIK;LIDREIISHDTR;LIDREIISHDTRR;LWYTLDR;MSQYLESMQIGDTIEFR;STPAITLESPDIK;STPAITLESPDIKYPLR;SVGMIAGGTGITPMLQVIR;VYFKDTHPK
3.44354	3.30092	3.3884	3.35616	3.30992	3.41064	0.0546061	0.754402	20	20	56.256	P00390	GSR	Glutathione reductase, mitochondrial	AAELGAR;AAVVESHK;ADFDNTVAIHPTSSEELVTLR;ALLTPVAIAAGR;EDSKLDYNNIPTVVFSHPPIGTVGLTEDEAIHK;GHAAFTSDPKPTIEVSGK;GHIIVDEFQNTNVK;GIYAVGDVCGK;KTLSGLEVSMVTAVPGR;LDYNNIPTVVFSHPPIGTVGLTEDEAIHK;LFEYKEDSK;LGIQTDDK;LGIQTDDKGHIIVDEFQNTNVK;LNAIYQNNLTK;QEPQPQGPPPAAGAVASYDYLVIGGGSGGLASAR;SFDSMISTNCTEELENAGVEVLK;SHIEIIR;TLSGLEVSMVTAVPGR;TYSTSFTPMYHAVTK;YGIENVK
-1.71921	-1.24738	-1.61442	-1.29021	-1.50424	-1.52975	-0.204974	1.14386	1	1	57.041	P00395	MT-CO1	Cytochrome c oxidase subunit 1	WLFSTNHK
1.08756	0.779127	0.885274	0.86062	0.90412	0.848728	0.056989	0.271136	7	7	25.565	P00403	MT-CO2	Cytochrome c oxidase subunit 2	IFEMGPVFTL;ILYMTDEVNDPSLTIK;LLDVDNR;LLDVDNRVVLPIEAPIR;MMITSQDVLHSWAVPTLGLK;TDAIPGR;VVLPIEAPIR
3.60842	3.02646	3.51635	3.16383	3.35072	3.34837	0.223028	1.23335	11	11	15.936	P00441	SOD1	Superoxide dismutase [Cu-Zn]	ADDLGKGGNEESTK;ESNGPVK;GDGPVQGIINFEQK;GGNEESTK;GLTEGLHGFHVHEFGDNTAGCTSAGPHFNPLSR;HGGPKDEER;HVGDLGNVTADK;HVGDLGNVTADKDGVADVSIEDSVISLSGDHCIIGR;KHGGPKDEER;LACGVIGIAQ;TLVVHEK
1.92282	1.77674	1.84578	1.81441	1.78543	1.88452	0.038414	0.396726	21	21	122.22	P00450;CON__ENSEMBL:ENSBTAP00000031900	CP	Ceruloplasmin	AEEEHLGILGPQLHADVGDK;ALYLQYTDETFR;DIFTGLIGPMK;ERGPEEEHLGILGPVIWAEVGDTIR;EVGPTNADPVCLAK;EYTDASFTNR;EYTDASFTNRK;GAYPLSIEPIGVR;GEFYIGSK;GPEEEHLGILGPVIWAEVGDTIR;GVYSSDVFDIFPGTYQTLEMFPR;IYHSHIDAPK;KAEEEHLGILGPQLHADVGDK;KLISVDTEHSNIYLQNGPDR;LISVDTEHSNIYLQNGPDR;MFTTAPDQVDKEDEDFQESNK;QSEDSTFYLGER;QYTDSTFR;SVPPSASHVAPTETFTYEWTVPK;TYSDHPEK;VNKDDEEFIESNK
0.461433	0.419123	0.383489	0.452351	0.416114	0.426134	-0.0157394	0.240121	15	15	32.118	P00491	PNP	Purine nucleoside phosphorylase	ANHEEVLAAGK;DHINLPGFSGQNPLR;DHINLPGFSGQNPLRGPNDER;FEVGDIMLIR;FGDRFPAMSDAYDR;FHMYEGYPLWK;FPAMSDAYDR;LGADAVGMSTVPEVIVAR;LTQAQIFDYGEIPNFPR;LVFGFLNGR;NTAEWLLSHTK;STVPGHAGR;VFGFSLITNK;VFHLLGVDTLVVTNAAGGLNPK;VIMDYESLEK
1.87262	1.36876	1.69102	1.58074	1.44001	1.64905	0.207682	1.18035	8	7	24.579	P00492	HPRT1	Hypoxanthine-guanine phosphoribosyltransferase	DLNHVCVISETGK;NVLIVEDIIDTGK;SIPMTVDFIR;SVGYKPDFVGFEIPDK;TMQTLLSLVR;VASLLVK;VFIPHGLIMDR;VIGGDDLSTLTGK
4.13859	3.69849	3.98258	3.8965	3.79728	3.95419	0.153397	1.04789	27	27	47.517	P00505	GOT2	Aspartate aminotransferase, mitochondrial	AEAQIAAK;ASAELALGENSEVLK;DADEAKR;DAGMQLQGYR;DDNGKPYVLPSVR;EFSIYMTK;EIATVVK;EIATVVKK;EYLPIGGLAEFCK;FVTVQTISGTGALR;IAAAILNTPDLR;IAAAILNTPDLRK;IGASFLQR;IPEQSVLLLHACAHNPTGVDPRPEQWK;ISVAGVTSSNVGYLAHAIHQVTK;KAEAQIAAK;KMNLGVGAYR;KQWLQEVK;MNLGVGAYR;MNLGVGAYRDDNGKPYVLPSVR;NLDKEYLPIGGLAEFCK;NMGLYGER;QWLQEVK;RVESQLK;TCGFDFTGAVEDISK;TQLVSNLK;VGAFTMVCK
0.736557	0.530186	0.486176	0.488899	0.497731	0.490627	0.0710328	0.338269	10	7	122.87	P00519	ABL1	Tyrosine-protein kinase ABL1	ATSLVDAVNSDAAKPSQPGEGLK;EISDIVQR;ESESSPGQR;GAVSTLLQAPELPTK;GPPEGGLNEDER;GSALGTPAAAEPVTPTSK;LMTGDTYTAHAGAK;TLKEDTMEVEEFLK;VADFGLSR;WTAPESLAYNK
2.10099	1.88036	1.9691	1.95053	1.90179	1.93101	0.0723025	0.60441	26	25	134.28	P00533	EGFR	Epidermal growth factor receptor	EISDGDVIISGNK;ELIIEFSK;ELVEPLTPSGEAPNQALLR;EYHAEGGK;GDSFTHTPPLDPQELDILK;GLWIPEGEK;GMNYLEDR;GMNYLEDRR;GNMYYENSYALAVLSNYDANK;GSHQISLDNPDYQQDFFPK;GSTAENAEYLR;IPLENLQIIR;ITDFGLAK;LFGTSGQK;LLGAEEK;LLGAEEKEYHAEGGK;LTQLGTFEDHFLSLQR;MHLPSPTDSNFYR;NLQEILHGAVR;NYDLSFLK;RPAGSVQNPVYHNQPLNPAPSR;SLKEISDGDVIISGNK;VKIPVAIK;VLGSGAFGTVYK;WMALESILHR;YLVIQGDER
6.54841	6.40503	6.48888	6.48259	6.48881	6.51937	-0.000762304	0.00821707	39	33	44.614	P00558	PGK1	Phosphoglycerate kinase 1	AAVPSIK;ACANPAAGSVILLENLR;AEPAKIEAFR;AGGFLMK;AHSSMVGVNLPQK;ALESPERPFLAILGGAK;ALMDEVVK;DCVGPEVEK;ELNYFAK;FCLDNGAK;FHVEEEGK;FHVEEEGKGK;GKDASGNK;IQLINNMLDK;ITLPVDFVTADK;ITLPVDFVTADKFDENAK;IVKDLMSK;KELNYFAK;KYAEAVTR;LGDVYVNDAFGTAHR;LTLDKLDVK;NNQITNNQR;QIVWNGPVGVFEWEAFAR;SLLGKDVLFLK;SLSNKLTLDKLDVK;SVVLMSHLGRPDGVPMPDK;SVVLMSHLGRPDGVPMPDKYSLEPVAVELK;TGQATVASGIPAGWMGLDCGPESSK;TGQATVASGIPAGWMGLDCGPESSKK;V…
3.05901	2.77373	2.92216	2.82895	2.79558	2.91907	0.118869	0.941168	16	15	21.635	P00568	AK1	Adenylate kinase isoenzyme 1	ATEPVIAFYEK;EVQQGEEFER;EVQQGEEFERR;GETSGRVDDNEETIK;GETSGRVDDNEETIKK;GFLIDGYPR;GQLVPLETVLDMLR;IGQPTLLLYVDAGPETMTQR;IIFVVGGPGSGK;KLSEIMEK;LSEIMEK;RLETYYK;SEVSSGSAR;VDDNEETIK;VDDNEETIKK;YGYTHLSTGDLLR
1.04583	0.88674	0.950599	0.881918	0.90499	0.957199	0.0676696	0.80747	12	11	80.118	P00736	C1R	Complement C1r subcomponent;Complement C1r subcomponent heavy chain;Complement C1r subcomponent light chain	GGGALLGDR;GYGFYTK;LGNHPIR;MGNFPWQVFTNIHGR;QRPPDLDTSSNAVDLLFFTDESGDSR;TLDEFTIIQNLQPQYQFR;VLNYVDWIK;VLNYVDWIKK;VSVHPDYR;WILTAAHTLYPK;YTTEIIK;YTTTMGVNTYK
-0.0772552	-0.112877	-0.107877	-0.146406	-0.151299	-0.108994	0.0314693	0.730251	14	14	85.532	P00751	CFB	Complement factor B;Complement factor B Ba fragment;Complement factor B Bb fragment	ALFVSEEEKK;DAQYAPGYDK;DISEVVTPR;DNEQHVFK;EAGIPEFYDYDVALIK;EKLQDEDLGFL;GDSGGPLIVHK;ISVIRPSK;LQDEDLGFL;QLNEINYEDHK;QVPAHAR;VKDISEVVTPR;VSEADSSNADWVTK;YGLVTYATYPK
2.38544	2.2429	2.2854	2.26779	2.28299	2.27313	0.0321325	0.322186	15	15	40.764	P00813	ADA	Adenosine deaminase	AQTPAFDKPK;AYGMPPSASAGQNL;DMGFTEEEFKR;EAVDILK;EGVVYVEVR;ELLDLLYK;HQPNWSPK;IAYEFVEMK;LGHGYHTLEDQALYNR;LKNDQANYSLNTDDPLIFK;LNINAAK;SSFLPEDEKR;STLDTDYQMTK;TVHAGEVGSAEVVK;YSPHLLANSK
2.82559	2.46913	2.67633	2.60215	2.56358	2.68652	0.103081	0.738025	15	15	29.246	P00918	CA2	Carbonic anhydrase 2	AVQQPDGLAVLGIFLK;EPISVSSEQVLK;GGPLDGTYR;ILNNGHAFNVEFDDSQDK;ILNNGHAFNVEFDDSQDKAVLK;KLNFNGEGEPEELMVDNWRPAQPLK;KYAAELHLVHWNTK;LNFNGEGEPEELMVDNWRPAQPLK;QSPVDIDTHTAK;SADFTNFDPR;SHHWGYGK;VGSAKPGLQK;VVDVLDSIK;YAAELHLVHWNTK;YDPSLKPLSVSYDQATSLR
3.13401	2.94699	3.0364	3.03903	2.99403	3.05293	0.0335528	0.34317	21	21	46.53	P00966	ASS1	Argininosuccinate synthase	APNTPDILEIEFK;APNTPDILEIEFKK;DGTTHQTSLELFMYLNEVAGK;EFVEEFIWPAIQSSALYEDR;EQGYDVIAYLANIGQK;EQGYDVIAYLANIGQKEDFEEAR;FELSCYSLAPQIK;GIYETPAGTILYHAHLDIEAFTMDR;GQVYILGR;GRNDLMEYAK;IDIVENR;KVFIEDVSR;MPEFYNR;NDLMEYAK;NPWSMDENLMHISYEAGILENPK;NQAPPGLYTK;QHGIPIPVTPK;QVEIAQR;VFIEDVSR;VQVSVLK;YVSHGATGK
2.7526	2.66851	2.65547	2.56787	2.69988	2.70242	0.0098273	0.0523929	16	16	47.65	P01011	SERPINA3	Alpha-1-antichymotrypsin;Alpha-1-antichymotrypsin His-Pro-less	ADLSGITGAR;AKWEMPFDPQDTHQSR;AVLDVFEEGTEASAATAVK;EIGELYLPK;EQLSLLDR;EQLSLLDRFTEDAK;EQLSLLDRFTEDAKR;FTEDAKR;ITLLSALVETR;KLINDYVK;LINDYVK;LYGSEAFATDFQDSAAAK;MEEVEAMLLPETLK;NLAVSQVVHK;RLYGSEAFATDFQDSAAAK;WEMPFDPQDTHQSR
3.45388	3.22017	3.34381	3.25107	3.2188	3.31131	0.113295	1.09245	61	54	187.15	P01024;O95568	C3	Complement C3;Complement C3 beta chain;C3-beta-c;Complement C3 alpha chain;C3a anaphylatoxin;Acylation stimulating protein;Complement C3b alpha chain;Complement C3c alpha chain fragment 1;Complement C3dg fragment;Complement C3g fragment;Complement C3d fragment;Complement C3f fragment;Complement C3c alpha chain fragment 2	AAVYHHFISDGVR;AEDLVGK;AGDFLEANYMNLQR;APSTWLTAYVVK;ASHLGLAR;AYYENSPQQVFSTEFEVK;DFDFVPPVVR;DSITTWEILAVSMSDK;DYAGVFSDAGLTFTSSSGQQTAQR;EALKLEEK;EGVQKEDIPPADLSDQVPDTESETR;EVVADSVWVDVK;EYVLPSFEVIVEPTEK;FYHPEKEDGK;FYYIYNEK;GLEVTITAR;GQGTLSVVTMYHAK;GVFVLNK;GVFVLNKK;GYTQQLAFR;IEGDHGAR;IFTVNHK;IHWESASLLR;ILLQGTPVAQMTEDAVDAER;IPIEDGSGEVVLSR;ISLPESLK;ISLPESLKR;IWDVVEK;KLVLSSEK;KQELSEAEQATR;KVEGTAFVIFGIQDGEQR…
-2.60198	-2.37903	-2.63127	-2.42823	-2.39971	-2.54953	-0.152543	1.50268	1	1	23.171	P01033	TIMP1	Metalloproteinase inhibitor 1	GFQALGDAADIR
0.932877	1.16681	0.969798	1.07801	1.16297	1.04811	-0.141448	1.75884	5	5	15.799	P01034	CST3	Cystatin-C	ALDFAVGEYNK;ASNDMYHSR;LVGGPMDASVEEEGVR;LVGGPMDASVEEEGVRR;TQPNLDNCPFHDQPHLK
1.48443	1.25987	1.33874	1.26522	1.30465	1.34141	0.0984325	0.952158	8	2	21.229	P01111	NRAS	GTPase NRas	LVVVGAGGVGK;QAHELAK;QGVEDAFYTLVR;SALTIQLIQNHFVDEYDPTIEDSYR;SALTIQLIQNHFVDEYDPTIEDSYRK;SFADINLYR;SYGIPFIETSAK;VKDSDDVPMVLVGNK
-1.03718	-1.32844	-1.24851	-1.19246	-1.3519	-1.21057	0.091383	0.491525	8	2	21.298	P01112	HRAS	GTPase HRas;GTPase HRas, N-terminally processed	LVVVGAGGVGK;QAQDLAR;QGVEDAFYTLVR;SALTIQLIQNHFVDEYDPTIEDSYR;SALTIQLIQNHFVDEYDPTIEDSYRK;SFEDIHQYR;SYGIPYIETSAK;VKDSDDVPMVLVGNK
-2.0356	-1.81745	-2.0134	-1.88099	-1.81717	-1.96771	-0.0997181	0.808991	7	2	21.656	P01116	KRAS	GTPase KRas;GTPase KRas, N-terminally processed	LVVVGAGGVGK;QAQDLAR;SALTIQLIQNHFVDEYDPTIEDSYR;SALTIQLIQNHFVDEYDPTIEDSYRK;SFEDIHHYR;SYGIPFIETSAK;VKDSEDVPMVLVGNK
-2.23161	-2.03165	-2.16465	-2.01797	-2.03218	-2.09751	-0.128083	1.57007	3	2	95.375	P01130	LDLR	Low-density lipoprotein receptor	AHGVSSYDTVISR;LAHPFSLAVFEDK;LYWVDSK
1.69185	1.48286	1.59168	1.53864	1.65041	1.50872	0.0820109	0.717112	11	7	40.46	P01889	HLA-B	HLA class I histocompatibility antigen, B alpha chain	APWIEQEGPEYWDR;AQAQTDRESLR;DGEDQTQDTELVETRPAGDR;FDSDAASPR;FISVGYVDDTQFVR;GGSYSQAACSDSAQGSDVSLTA;GHDQYAYDGK;GHDQYAYDGKDYIALNEDLR;SWTAADTAAQITQR;WAAVVVPSGEEQR;YFYTSVSRPGR
1.38242	0.594936	1.3266	1.07804	1.00803	1.14968	0.292007	2.47326	13	13	138.91	P02452;CON__Q862S4	COL1A1	Collagen alpha-1(I) chain	ADDANVVR;ALLLQGSNEIEIR;GDAGPAGPK;GDKGETGEQGDR;GDRGDAGPK;GEAGPQGPR;GESGPSGPAGPTGAR;GETGPAGPAGPVGPVGAR;GFSGLDGAK;GPAGPQGPR;GSEGPQGVR;QGPSGASGER;SGDRGETGPAGPAGPVGPVGAR
-4.20501	-3.47281	-3.89278	-3.69117	-3.705	-3.7275	-0.32864	1.63826	3	3	138.56	P02461;CON__P04258	COL3A1	Collagen alpha-1(III) chain	GAPGPQGPR;GDAGQPGEK;GPVGPSGPPGK
5.37145	5.21321	5.32732	5.37694	5.43258	5.37895	-0.0722014	1.00278	18	18	20.159	P02511	CRYAB	Alpha-crystallin B chain	APSWFDTGLSEMR;APSWFDTGLSEMRLEK;DRFSVNLDVK;EEKPAVTAAPK;FSVNLDVK;HEERQDEHGFISR;HFSPEELK;HFSPEELKVK;IPADVDPLTITSSLSSDGVLTVNGPR;KQVSGPER;MDIAIHHPWIR;QDEHGFISR;QVSGPER;TIPITREEKPAVTAAPK;VLGDVIEVHGK;VLGDVIEVHGKHEER;VLGDVIEVHGKHEERQDEHGFISR;YRIPADVDPLTITSSLSSDGVLTVNGPR
6.31657	5.94969	6.1592	6.02767	6.08505	6.13154	0.106036	0.645253	65	63	74.139	P02545;REV__Q5VX52	LMNA	Prelamin-A/C;Lamin-A/C	AAYEAELGDAR;AAYEAELGDARK;AGQVVTIWAAGAGATHSPPTDLVWK;AQHEDQVEQYK;AQHEDQVEQYKK;AQNTWGCGNSLR;ASASGSGAQVGGPISSGSSASSVTVTR;ASSHSSQTQGGGSVTK;ASSHSSQTQGGGSVTKK;DLEALLNSK;DLEDSLAR;EAALSTALSEK;EAALSTALSEKR;EDLQELNDR;EELDFQK;EGDLIAAQAR;IDSLSAQLSQLQK;ITESEEVVSR;KEGDLIAAQAR;KLESTESR;KLLEGEEER;KLLEGEEERLR;KQLQDEMLR;KTLDSVAK;LADALQELR;LALDMEIHAYR;LALDMEIHAYRK;LAVYIDR;LEAALGEAK;LEAALGEAKK;LESTESR;LKDLEALLNSK;LLA…
2.65985	2.30841	2.44013	2.31515	2.38472	2.41232	0.143454	0.850385	17	17	36.154	P02649;CON__Q03247	APOE	Apolipoprotein E	AATVGSLAGQPLQER;AKLEEQAQQIR;ALMDETMK;AQAWGER;AYKSELEEQLTPVAEETR;DADDLQK;DRLDEVK;ELQAAQAR;EQVAEVR;GEVQAMLGQSTEELR;LAVYQAGAR;LGPLVEQGR;LQAEAFQAR;QWAGLVEK;SELEEQLTPVAEETR;SWFEPLVEDMQR;WVQTLSEQVQEELLSSQVTQELR
-3.39964	-3.47524	-3.3638	-3.06306	-3.43495	-3.28517	-0.122192	0.490504	1	1	10.852	P02656	APOC3	Apolipoprotein C-III	DALSSVQESQVAQQAR
-2.03835	-2.71929	-2.30739	-2.33039	-2.74436	-2.49341	0.289997	0.869033	2	2	33.117	P02686	MBP	Myelin basic protein	DAPGREDNTFK;DRPSESDELQTIQEDSAATSESLDVMASQK
0.865166	0.942833	0.800494	0.960331	0.862514	0.892784	-0.0664927	0.887439	17	17	272.32	P02751	FN1	Fibronectin;Anastellin;Ugl-Y1;Ugl-Y2;Ugl-Y3	AQITGYR;ESKPLTAQQTTK;FLATTPNSLLVSWQPPR;GDSPASSKPISINYR;GLAFTDVDVDSIK;GLKPGVVYEGQLISIQQYGHQEVTR;ITYGETGGNSPVQEFTVPGSK;IYLYTLNDNAR;NLQPASEYTVSLVAIK;QYNVGPSVSK;STTPDITGYR;SYTITGLQPGTDYK;VDVIPVNLPGEHGQR;VFAVSHGR;VGDTYERPK;VTWAPPPSIDLTNFLVR;WLPSSSPVTGYR
-3.7978	-3.97719	-3.98709	-4.07824	-3.90172	-3.94008	0.0558783	0.279057	2	2	23.01	P02753	RBP4	Retinol-binding protein 4;Plasma retinol-binding protein(1-182);Plasma retinol-binding protein(1-181);Plasma retinol-binding protein(1-179);Plasma retinol-binding protein(1-176)	VKENFDK;YWGVASFLQK
0.794603	0.62665	0.710519	0.604042	0.726262	0.698866	0.037885	0.257475	7	7	15.887	P02766	TTR	Transthyretin	AADDTWEPFASGK;ALGISPFHEHAEVVFTANDSGPR;ASHRLLLLCLAGLVFVSEAGPTGTGESK;GSPAINVAVHVFR;KAADDTWEPFASGK;TSESGELHGLTTEEEFVEGIYK;YTIAALLSPYSYSTTAVVTNPKE
2.64985	2.48678	2.52366	2.47859	2.50557	2.58469	0.0573184	0.5151	22	22	84.87	P02786;Q9UP52	TFRC	Transferrin receptor protein 1;Transferrin receptor protein 1, serum form	AAAEVAGQFVIK;AATVTGK;AFTYINLDK;AVLGTSNFK;DAWGPGAAK;DSAQNSVIIVDK;GFVEPDHYVVVGAQR;HPVTGQFLYQDSNWASK;ILNIFGVIK;LAQMFSDMVLK;LAVDEEENADNNTK;LLNENSYVPR;LTHDVELNLDYER;LTVSNVLK;LVHANFGTK;LVYLVENPGGYVAYSK;LYWDDLKR;MVTSESK;QVDGDNSHVEMK;SSGLPNIPVQTISR;VEYHFLSPYVSPK;VSASPLLYTLIEK
2.83478	2.71172	2.8575	2.79986	2.8582	2.88671	0.00062116	0.00769384	12	12	20.019	P02792	FTL	Ferritin light chain	AAMALEK;ALFQDIK;DDVALEGVSHFFR;ELAEEKR;KLNQALLDLHALGSAR;KMGDHLTNLHR;KPAEDEWGK;KPAEDEWGKTPDAMK;LGGPEAGLGEYLFER;LNQALLDLHALGSAR;MGDHLTNLHR;TDPHLCDFLETHFLDEEVK
3.24665	3.03466	3.19255	3.09405	3.0477	3.07028	0.131154	2.07111	15	15	21.225	P02794	FTH1	Ferritin heavy chain;Ferritin heavy chain, N-terminally processed	AIKELGDHVTNLR;AIKELGDHVTNLRK;ELGDHVTNLR;ELGDHVTNLRK;HTLGDSDNES;IFLQDIK;KMGAPESGLAEYLFDK;KMGAPESGLAEYLFDKHTLGDSDNES;LATDKNDPHLCDFIETHYLNEQVK;MGAPESGLAEYLFDK;MGAPESGLAEYLFDKHTLGDSDNES;NVNQSLLELHK;QNYHQDSEAAINR;YFLHQSHEER;YFLHQSHEEREHAEK
-3.22675	-3.06585	-3.08588	-2.9821	-3.1359	-3.09986	-0.0462421	0.254364	2	2	35.66	P03886	MT-ND1	NADH-ubiquinone oxidoreductase chain 1	GPNVVGPYGLLQPFADAMK;ILGYMQLR
-4.82125	-5.36473	-5.11603	-5.14452	-5.42212	-5.26627	0.268152	1.01537	1	1	38.96	P03891	MT-ND2	NADH-ubiquinone oxidoreductase chain 2	WAIIEEFTK
-1.41771	-1.67416	-1.51034	-1.55411	-1.64229	-1.58962	0.113553	1.29591	4	4	67.026	P03915	MT-ND5	NADH-ubiquinone oxidoreductase chain 5	FPTLTNINENNPTLLNPIK;FPTLTNINENNPTLLNPIKR;MILLTLTGQPR;NSYPHYVK
0.834534	-0.215736	0.624051	0.234699	0.0117235	0.428978	0.465071	1.52759	1	1	7.9916	P03928	MT-ATP8	ATP synthase protein 8	NYNKPWEPK
3.77577	3.639	3.69899	3.70677	3.61845	3.67682	0.04603	0.479232	33	33	59.755	P04040	CAT	Catalase	ADSRDPASDQMQHWK;ADVLTTGAGNPVGDK;ADVLTTGAGNPVGDKLNVITVGPR;AFYVNVLNEEQR;DAQIFIQK;DLFNAIATGK;DPASDQMQHWK;DPILFPSFIHSQK;DYPLIPVGK;FNTANDDNVTQVR;FSTVAGESGSADTVR;FSTVAGESGSADTVRDPR;FYTEDGNWDLVGNNTPIFFIR;GAGAFGYFEVTHDITK;GIPDGHR;GPLLVQDVVFTDEMAHFDR;GPLLVQDVVFTDEMAHFDRER;KTPIAVR;LCENIAGHLK;LFAYPDTHR;LGPNYLHIPVNCPYR;LNVITVGPR;LSQEDPDYGIR;NAIHTFVQSGSHLAAR;NFTEVHPDYGSHIQALLDK;NFTEVHPDYGSHIQALLDKYNAEKPK;NLSV…
-3.42441	-3.32376	-3.66769	-3.51937	-3.53707	-3.58097	-0.0515579	0.226953	7	3	73.051	P04049	RAF1	RAF proto-oncogene serine/threonine-protein kinase	APVSGTQEK;GYASPDLSK;IGDFGLATVK;QTAQGMDYLHAK;SNNIFLHEGLTVK;VVDPTPEQFQAFR;WHGDVAVK
2.28763	2.12607	2.16659	2.17192	2.10431	2.14324	0.0581493	0.514869	15	15	59.716	P04062	GBA1	Lysosomal acid glucosylceramidase	ATLGETHR;DVPLTIK;FIPEGSQR;FLDAYAEHK;FWEQSVR;GFGGAMTDAAALNILALSPPAQNLLLK;GQPGDIYHQTWAR;LLLPHWAK;LLMLDDQR;NDLDAVALMHPDGSAVVVVLNR;NFVDSPIIVDITK;QPMFYHLGHFSK;SYFSEEGIGYNIIR;VGLVASQK;VVLTDPEAAK
1.74582	1.50226	1.60044	1.57804	1.50551	1.59944	0.0983505	0.871379	10	10	53.688	P04066	FUCA1	Tissue alpha-L-fucosidase	DGLIVPIFQER;DLVGELGTALR;DNYPPGFSYADFGPQFTAR;FFHPEEWADLFQAAGAK;ITMLGIQGDLK;RYTPDWPSLDSRPLPAWFDEAK;TQHFVSAK;WSTDPDK;YTPDWPSLDSRPLPAWFDEAK;YVVLTTK
5.242	5.12933	5.16487	5.14445	5.1444	5.19165	0.0237033	0.284838	32	28	39.42	P04075	ALDOA	Fructose-bisphosphate aldolase A	AAQEEYVK;AAQEEYVKR;ADDGRPFPQVIK;ALANSLACQGK;ALQASALK;ALSDHHIYLEGTLLKPNMVTPGHACTQK;DGADFAK;ELSDIAHR;FSHEEIAMATVTALR;FSHEEIAMATVTALRR;GGVVGIK;GGVVGIKVDK;GILAADESTGSIAK;GILAADESTGSIAKR;GVVPLAGTNGETTTQGLDGLSER;IGEHTPSALAIMENANVLAR;KDGADFAK;KELSDIAHR;LQSIGTENTEENR;LQSIGTENTEENRR;PYQYPALTPEQK;PYQYPALTPEQKK;QLLLTADDR;RLQSIGTENTEENR;RLQSIGTENTEENRR;SKGGVVGIK;TVPPAVTGITFLSGGQSEEEASINLNAINK;VDKGVVPLAGTNGET…
3.38548	2.67621	3.28871	2.97419	3.07692	3.13163	0.246724	1.79748	8	8	11.139	P04080	CSTB	Cystatin-B	AKHDELTYF;HDELTYF;MMCGAPSATQPATAETQHIADQVR;SQLEEKENK;SQLEEKENKK;SQVVAGTNYFIK;VFQSLPHENKPLTLSNYQTNK;VHVGDEDFVHLR
5.66287	5.59421	5.63165	5.49753	5.58444	5.51322	0.0840225	0.928312	29	29	38.714	P04083	ANXA1	Annexin A1;Annexin Ac2-26	AAYLQETGKPLDETLK;AAYLQETGKPLDETLKK;ALTGHLEEVVLALLK;ALYEAGER;ALYEAGERR;AMVSEFLK;CATSKPAFFAEK;DITSDTSGDFR;DLAKDITSDTSGDFR;GDRSEDFGVNEDLADSDAR;GGPGSAVSPYPTFNPSSDVAALHK;GLGTDEDTLIEILASR;GTDVNVFNTILTTR;GVDEATIIDILTK;GVDEATIIDILTKR;ILVALCGGN;KGTDVNVFNTILTTR;MYGISLCQAILDETK;MYGISLCQAILDETKGDYEK;NALLSLAK;QAWFIENEEQEYVQTVK;RKGTDVNVFNTILTTR;SEDFGVNEDLADSDAR;SEIDMNDIK;TPAQFDADELR;VLDLELK;VLDLELKGDIEK;VYREEL…
-0.703182	-0.711863	-0.849996	-0.805737	-0.761378	-0.807787	-0.0182635	0.118826	4	3	515.54	P04114	APOB	Apolipoprotein B-100;Apolipoprotein B-48	AAIQALRK;DKDQEVLLQTFLDDASPGDK;EVSSKLR;INSGAHK
-2.95699	-2.52271	-2.6905	-2.58469	-2.61557	-2.50125	-0.173262	0.662947	1	1	85.658	P04150	NR3C1	Glucocorticoid receptor	GIQQATTGVSQETSENPGNK
-0.11154	-0.780191	-0.337132	-0.639818	-0.645305	-0.477566	0.316255	1.50301	2	2	27.661	P04156	PRNP	Major prion protein	ESQAYYQR;QHTVTTTTK
4.50067	4.35717	4.46638	4.44637	4.38066	4.47282	0.034591	0.450248	17	17	24.75	P04179	SOD2	Superoxide dismutase [Mn], mitochondrial	AIWNVINWENVTER;DFGSFDK;DFGSFDKFK;DFGSFDKFKEK;EKLTAASVGVQGSGWGWLGFNK;FNGGGHINHSIFWTNLSPNGGGEPK;GDVTAQIALQPALK;GELLEAIK;GELLEAIKR;HHAAYVNNLNVTEEK;HHAAYVNNLNVTEEKYQEALAK;HSLPDLPYDYGALEPHINAQIMQLHHSK;LTAASVGVQGSGWGWLGFNK;NVRPDYLK;RDFGSFDK;RDFGSFDKFK;YQEALAK
2.82998	2.54264	2.68073	2.53428	2.63797	2.6974	0.0975761	0.598505	21	21	48.534	P04181	OAT	Ornithine aminotransferase, mitochondrial;Ornithine aminotransferase, hepatic form;Ornithine aminotransferase, renal form	AFYNNVLGEYEEYITK;ALQDPNVAAFMVEPIQGEAGVVVPDPGYLMGVR;DNGLLAKPTHGDIIR;EDELRESIEIINK;ESIEIINK;FAPPLVIK;FAPPLVIKEDELR;FAPPLVIKEDELRESIEIINK;GIYLWDVEGR;GIYLWDVEGRK;GLLNAIVIK;HQVLFIADEIQTGLAR;IVFAAGNFWGR;KTVQGPPTSDDIFER;KWGYTVK;SQVDKLTLTSR;TVQGPPTSDDIFER;VAIAALEVLEEENLAENADK;VLPMNTGVEAGETACK;WLAVDYENVRPDIVLLGK;YGAHNYHPLPVALER
-3.62362	-3.43593	-3.52927	-3.45283	-3.53022	-3.5276	-0.0513465	0.525056	2	2	17.935	P04216	THY1	Thy-1 membrane glycoprotein	HVLFGTVGVPEHTYR;VLYLSAFTSK
3.13332	2.2087	3.12851	3.38334	2.27442	3.06288	0.0223217	0.019226	36	23	66.038	P04264;CON__P04264	KRT1	Keratin, type II cytoskeletal 1	AEAESLYQSK;AQYEDIAQK;DVDGAYMTK;DYQELMNTK;FLEQQNQVLQTK;GENALKDAK;GGGGGGYGSGGSSYGSGGGSYGSGGGGGGGR;GSGGGSSGGSIGGR;GSSSGGVK;IEISELNR;KDVDGAYMTK;KQISNLQQSISDAEQR;LALDLEIATYR;LNDLEDALQQAK;LNDLEDALQQAKEDLAR;LRSEIDNVKK;NKLNDLEDALQQAK;NKYEDEINK;NKYEDEINKR;NMQDMVEDYR;QISNLQQSISDAEQR;QISNLQQSISDAEQRGENALK;RTNAENEFVTIK;SEIDNVK;SKAEAESLYQSK;SLDLDSIIAEVK;SLNNQFASFIDK;SLNNQFASFIDKVR;SLVNLGGSK;THNLEPYFESFINNLR;T…
0.0634174	0.232224	0.136672	0.456041	0.113742	0.238461	-0.145982	0.626503	4	4	10.713	P04271	S100B	Protein S100-B	AMVALIDVFHQYSGR;ELINNELSHFLEEIK;ELINNELSHFLEEIKEQEVVDK;EQEVVDK
2.74036	2.84388	2.78353	2.83045	2.85686	2.75657	-0.0535412	0.757199	21	3	49.585	P04350	TUBB4A	Tubulin beta-4A chain	ALTVPELTQQMFDAK;AVLVDLEPGTMDSVR;EIVHLQAGQCGNQIGAK;EVDEQMLSVQSK;FPGQLNADLR;FPGQLNADLRK;FWEVISDEHGIDPTGTYHGDSDLQLER;GHYTEGAELVDAVLDVVR;GHYTEGAELVDAVLDVVRK;IMNTFSVVPSPK;INVYYNEATGGNYVPR;IREEFPDR;ISEQFTAMFR;KLAVNMVPFPR;LAVNMVPFPR;LHFFMPGFAPLTSR;LTTPTYGDLNHLVSATMSGVTTCLR;MAATFIGNSTAIQELFK;NSSYFVEWIPNNVK;SGPFGQIFRPDNFVFGQSGAGNNWAK;YLTVAAVFR
6.56794	6.36394	6.47079	6.43891	6.48079	6.50764	0.0213661	0.200852	25	25	36.053	P04406;O14556	GAPDH	Glyceraldehyde-3-phosphate dehydrogenase	AAFNSGK;AENGKLVINGNPITIFQER;AENGKLVINGNPITIFQERDPSK;AGAHLQGGAK;AGAHLQGGAKR;GALQNIIPASTGAAK;IISNASCTTNCLAPLAK;IKWGDAGAEYVVESTGVFTTMEK;LEKPAKYDDIK;LISWYDNEFGYSNR;LTGMAFR;LVINGNPITIFQER;LVINGNPITIFQERDPSK;QASEGPLK;RVIISAPSADAPMFVMGVNHEK;TVDGPSGK;VGVNGFGR;VIHDNFGIVEGLMTTVHAITATQK;VIISAPSADAPMFVMGVNHEK;VIISAPSADAPMFVMGVNHEKYDNSLK;VIPELNGK;VPTANVSVVDLTCR;VVDLMAHMASK;VVDLMAHMASKE;WGDAGAEYVVESTGVFTTMEK
1.04944	1.03583	1.03821	1.04851	1.01992	1.06147	0.000546137	0.0142384	13	13	51.657	P04424	ASL	Argininosuccinate lyase	AEAERDVLFPGYTHLQR;AEMDQILHGLDK;ALLQAQQA;AVFMAETK;DVLFPGYTHLQR;ELIGATAGK;FNASIAYDR;FVGAVDPIMEK;GLPSTYNK;HLWEVDVQGSK;INVLPLGSGAIAGNPLGVDR;LNSNDEDIHTANER;QAHEASGK
2.95616	2.49036	2.81043	2.61158	2.65549	2.69732	0.203256	1.68084	18	14	40.84	P04439	HLA-A	HLA class I histocompatibility antigen, A alpha chain	APWIEQEGPEYWDQETR;AQSQTDRVDLGTLR;DGEDQTQDTELVETRPAGDGTFQK;FDSDAASQR;FIAVGYVDDTQFVR;GGSYTQAASSDSAQGSDVSLTACK;GYRQDAYDGKDYIALNEDLR;KGGSYTQAASSDSAQGSDVSLTACK;KGGSYTQAASSDSAQGSDVSLTACKV;KWEAAHEAEQLR;QDAYDGK;QDAYDGKDYIALNEDLR;RKWEAAHEAEQLR;SWTAADMAAQITK;THMTHHPISDHEATLR;VDLGTLR;WAAVVVPSGEEQR;WEAAHEAEQLR
-1.24624	-1.56328	-1.47313	-1.5015	-1.46025	-1.51059	0.0943756	0.543994	6	3	137.91	P04626;Q5TCX8;P80192;Q02779	ERBB2	Receptor tyrosine-protein kinase erbB-2	EIPDLLEK;GIWIPDGENVK;ITDFGLAR;LLDIDETEYHADGGK;SLTEILK;VLGSGAFGTVYK
2.33112	1.72101	2.18406	1.90094	1.89305	2.02568	0.309207	2.1469	8	8	28.315	P04632;Q96L46	CAPNS1	Calpain small subunit 1	GGGGGGGGGGGLGGGLGNVLGGLISGAGGGGGGGGGGGGGGGGGGGGTAMR;ILGGVISAISEAAAQYNPEPPPPR;LFAQLAGDDMEVSATELMNILNK;LGFEEFK;MFLVNSFLK;SMVAVMDSDTTGK;THYSNIEANESEEVR;YLWNNIK
4.44463	3.97003	4.2583	4.13794	4.09139	4.20063	0.184769	1.29925	19	19	22.782	P04792	HSPB1	Heat shock protein beta-1	AQLGGPEAAK;DGVVEITGK;DGVVEITGKHEER;DGVVEITGKHEERQDEHGYISR;DWYPHSR;GPSWDPFR;GPSWDPFRDWYPHSR;HEERQDEHGYISR;KYTLPPGVDPTQVSSSLSPEGTLTVEAPMPK;LATQSNEITIPVTFESR;LFDQAFGLPR;QDEHGYISR;QLSSGVSEIR;SDETAAK;TKDGVVEITGK;TKDGVVEITGKHEER;VPFSLLR;VSLDVNHFAPDELTVK;YTLPPGVDPTQVSSSLSPEGTLTVEAPMPK
4.65438	4.43705	4.55463	4.53199	4.50877	4.5347	0.052433	0.580402	40	40	68.569	P04843	RPN1	Dolichyl-diphosphooligosaccharide--protein glycosyltransferase subunit 1	ALTSEIALLQSR;APDELHYTYLDTFGRPVIVAYK;APDELHYTYLDTFGRPVIVAYKK;ATSFLLALEPELEAR;DISTLNSGK;DISTLNSGKK;DTYIENEK;DVPAYSQDTFK;FPLFGGWK;FVDHVFDEQVIDSLTVK;GEDEEENNLEVR;HFDETVNR;HTGAVLK;IDHILDAL;IILPEGAK;ISVIVETVYTHVLHPYPTQITQSEK;KDTYIENEK;KSLETEHK;LAHLGVQVK;LAHLGVQVKGEDEEENNLEVR;LDFSITK;LDFSITKDPAAEAR;LKTEGSDLCDR;LPVALDPGAK;NIEIDSPYEISR;NLVEQHIQDIVVHYTFNK;NVESYTK;QFVVFEGNHYFYSPYPTK;QPDSGISSIR;RQELVTK;SAVEA…
2.97201	2.6995	2.85816	2.79243	2.7001	2.84768	0.114142	0.918473	22	22	69.283	P04844	RPN2	Dolichyl-diphosphooligosaccharide--protein glycosyltransferase subunit 2	EDQVIQLMNAIFSK;EETVLATVQALQTASHLSQQADLR;FELDTSER;FPEEEAPSTVLSQNLFTPK;FSSGYYDFLVEVEGDNR;ISTEVGITNVDLSTVDKDQSIAPK;KNFESLSEAFSVASAAAVLSHNR;LMDHVGTEPSIK;LQVTNVLSQPLTQATVK;LSKEETVLATVQALQTASHLSQQADLR;MLAQQAVK;NFESLSEAFSVASAAAVLSHNR;NPILWNVADVVIK;NVYKFELDTSER;QEIQHLFR;QEIQHLFREPEK;SIVEEIEDLVAR;TGQEVVFVAEPDNK;TGQEVVFVAEPDNKNVYK;TSFTPVGDVFELNFMNVK;YHVPVVVVPEGSASDTHEQAILR;YIANTVELR
2.81424	2.53651	2.64777	2.58059	2.61247	2.63975	0.0958303	0.782659	18	10	40.45	P04899;A8MTJ3;P11488	GNAI2	Guanine nucleotide-binding protein G(i) subunit alpha-2	AMGNLQIDFADPSR;AMGNLQIDFADPSRADDAR;AVVYSNTIQSIMAIVK;EIYTHFTCATDTK;EYQLNDSAAYYLNDLER;FEDLNKR;IAQSDYIPTQQDVLR;IIHEDGYSEEECR;KDLFEEK;LFDSICNNK;LLLLGAGESGK;LWADHGVQACFGR;MFDVGGQR;NLREDGEK;NVQFVFDAVTDVIIK;QLFALSCTAEEQGVLPDDLSGVIR;TTGIVETHFTFK;YDEAASYIQSK
1.15119	0.878401	0.890204	0.898178	0.825675	0.839769	0.118918	0.578006	25	25	137.01	P04920;P48751	SLC4A2	Anion exchange protein 2	ALLQMVEAAGAAEDDPLR;ALLQMVEAAGAAEDDPLRR;AVAPGDKPK;EGREPGPTPR;ELPPPAPPAGITR;EPGPTPR;FEEDVEEETER;FEEILQEAGSR;GADSFCTPEPESLGPGTPGFPEQEEDELHR;GAQAGTQVEEAEAEAVAVASGTAGGDDGGASGRPLPK;GWVINPLGEK;HSHPSDEKDFSFPR;IGSMTGAEQALLPR;LHLLLMPPK;LLPTGAGLEPK;LSVPSGFSVTAPEK;LSVPSGFSVTAPEKR;SISTLMSDK;SLAGQSGQGKPR;SVAHFQR;SYGEEDFEYHR;SYNLQER;TSPSSPAPLPHQEATPR;VPTDEIEAQTLATADLDLMK;WIKFEEDVEEETER
-1.84038	-1.72495	-1.75682	-1.59668	-1.87507	-1.79217	-0.107733	0.43043	2	2	13.81	P04921;Q9UHC6	GYPC;CNTNAP2	Glycophorin-C;Contactin-associated protein-like 2	GTEFAESADAALQGDPALQDAGDSSR;GTYHTNEAK
4.94666	4.7863	4.84599	4.82325	4.80791	4.87066	0.0422643	0.454561	53	35	112.89	P05023;P20648	ATP1A1	Sodium/potassium-transporting ATPase subunit alpha-1	AAVPDAVGK;ADIGVAMGIAGSDVSK;AVAGDASESALLK;AVFQANQENLPILK;DAFQNAYLELGGLGER;DGPNALTPPPTTPEWIK;DKYEPAAVSEQGDK;DKYEPAAVSEQGDKK;DMDELKK;DMTSEQLDDILK;DRDMDELK;DRDMDELKK;EQPLDEELK;EQPLDEELKDAFQNAYLELGGLGER;EVSMDDHK;GGDRIPADLR;GIVVYTGDR;GVGIISEGNETVEDIAAR;IVEIPFNSTNK;KADIGVAMGIAGSDVSK;KYGTDLSR;LIFDNLK;LIFDNLKK;LIIVEGCQR;LNIPVSQVNPR;LSLDELHR;LSLDELHRK;MSINAEEVVVGDLVEVK;MTVAHMWFDNQIHEADTTENQSGVSFDK;NIAFFSTN…
2.96137	2.64566	2.83339	2.70024	2.71448	2.80495	0.120068	0.903965	16	16	35.061	P05026	ATP1B1	Sodium/potassium-transporting ATPase subunit beta-1	AKEEGSWK;AYGENIGYSEK;AYGENIGYSEKDR;DDMIFEDCGDVPSEPK;FIWNSEK;FIWNSEKK;GDFNHER;GDFNHERGER;KFIWNSEK;RDEDKDK;SYEAYVLNIVR;TEISFRPNDPK;VAPPGLTQIPQIQK;VGNVEYFGLGNSPGFPLQYYPYYGK;YKDSAQR;YNPNVLPVQCTGK
-1.79885	-0.879053	-1.52087	-0.961935	-0.997914	-1.28769	-0.535475	1.75696	1	1	78.275	P05060	CHGB	Secretogranin-1;PE-11;GAWK peptide;CCB peptide	ELENLAAMDLELQK
1.79389	1.61059	1.70283	1.66642	1.63989	1.71476	0.0624758	0.794146	19	18	86.942	P05067	APP	Amyloid-beta precursor protein;N-APP;Soluble APP-alpha;Soluble APP-beta;C99;Amyloid-beta protein 42;Amyloid-beta protein 40;C83;P3(42);P3(40);C80;Gamma-secretase C-terminal fragment 59;Gamma-secretase C-terminal fragment 57;Gamma-secretase C-terminal fragment 50;C31	AVIQHFQEK;AVIQHFQEKVESLEQEAANER;EQNYSDDVLANMISEPR;EWEEAER;GLTTRPGSGLTNIK;HVFNMLK;ISYGNDALMPSLTETK;LALENYITALQAVPPRPR;LVFFAEDVGSNK;QQLVETHMAR;SQVMTHLR;TEEISEVK;THPHFVIPYR;TTSIATTTTTTTESVEEVVR;VEAMLNDR;VESLEQEAANER;WDSDPSGTK;WYFDVTEGK;YLETPGDENEHAHFQK
4.28282	3.88819	4.11708	4.01489	3.95687	4.10919	0.154096	1.06602	32	27	56.381	P05091	ALDH2	Aldehyde dehydrogenase, mitochondrial	AAFQLGSPWR;ANNSTYGLAAAVFTK;EAGFPPGVVNIVPGFGPTAGAAIASHEDVDK;EEIFGPVMQILK;ELGEYGLQAYTEVK;FKTIEEVVGR;GYFIQPTVFGDVQDGMTIAK;ILGYINTGK;ILGYINTGKQEGAK;KILGYINTGK;KTFPTVNPSTGEVICQVAEGDKEDVDK;LADLIER;LADLIERDR;LGPALATGNVVVMK;LLCGGGIAADR;RMDASHR;RVTLELGGK;TEQGPQVDETQFK;TEQGPQVDETQFKK;TFPTVNPSTGEVICQVAEGDKEDVDK;TFVQEDIYDEFVER;TIEEVVGR;TIPIDGDFFSYTR;VAEQTPLTALYVANLIK;VAFTGSTEIGR;VIQVAAGSSNLK;VIQVAAGSSNLKR;VT…
-1.54848	-1.80804	-1.7531	-1.75724	-1.77711	-1.68214	0.0915769	0.625687	6	6	87.057	P05106	ITGB3	Integrin beta-3	DDLWSIQNLGTK;GSGDSSQVTQVSPQR;HVLTLTDQVTR;SFTIKPVGFK;VLEDRPLSDK;VLEDRPLSDKGSGDSSQVTQVSPQR
1.53389	0.973099	1.31002	1.1316	1.01441	1.23578	0.269642	1.33768	9	9	10.659	P05114	HMGN1	Non-histone chromosomal protein HMG-14	KVSSAEGAAK;KVSSAEGAAKEEPK;LSAKPPAK;QAEVANQETK;QAEVANQETKEDLPAENGETK;TEESPASDEAGEK;TEESPASDEAGEKEAK;VSSAEGAAK;VSSAEGAAKEEPK
-4.3876	-4.44474	-4.53123	-4.28412	-4.27729	-4.26494	-0.14525	1.19767	3	3	45.059	P05121	SERPINE1	Plasminogen activator inhibitor 1	ELMGPWNKDEISTTDAIFVQR;FIINDWVK;QVDFSEVER
1.9504	1.66469	1.74912	1.72628	1.63836	1.62977	0.110152	0.480387	18	6	32.852	P05141	SLC25A5	ADP/ATP translocase 2;ADP/ATP translocase 2, N-terminally processed	AAYFGIYDTAK;DFLAGGVAAAISK;EQGVLSFWR;GAWSNVLR;GLGDCLVK;GMLPDPK;GNLANVIR;KGTDIMYTGTLDCWR;LAADVGK;LLLQVQHASK;MMMQSGR;MTDAAVSFAK;QIFLGGVDK;QIFLGGVDKR;TAVAPIER;TDAAVSFAK;YFPTQALNFAFK;YFPTQALNFAFKDK
-0.551725	-0.681858	-0.630582	-0.702133	-0.69819	-0.644064	0.0776081	1.13698	7	7	55.154	P05155	SERPING1	Plasma protease C1 inhibitor	FQPTLLTLPR;GVTSVSQIFHSPDLAIR;KYPVAHFIDQTLK;LEDMEQALSPSVFK;LLDSLPSDTR;MEPFHFK;TNLESILSYPK
-3.15059	-3.10244	-3.1988	-3.19531	-3.25318	-3.18052	0.0307865	0.508552	4	4	65.75	P05156	CFI	Complement factor I;Complement factor I heavy chain;Complement factor I light chain	AQLGDLPWQVAIK;HGNTDSEGIVEVK;IIFHENYNAGTYQNDIALIEMK;VFSLQWGEVK
-0.202499	-0.368452	-0.221211	-0.0451469	0.286826	-0.279356	-0.103	0.209444	6	6	17.887	P05161	ISG15	Ubiquitin-like protein ISG15	GWDLTVK;IGVHAFQQR;LAVHPSGVALQDR;LTQTVAHLK;SSTYEVR;VPLASQGLGPGSTVLLVVDK
2.91919	2.63333	2.73699	2.65547	2.66853	2.7471	0.106962	0.727528	32	32	80.058	P05165	PCCA	Propionyl-CoA carboxylase alpha chain, mitochondrial	AEVNTIPGFDGVVK;AMGEQAVALAR;AQAVHPGYGFLSENK;AQAVHPGYGFLSENKEFAR;AQHFQENSR;ASAGGGGK;EAGGNMSIQFLGTVYK;EIGYPVMIK;FLSDVYPDGFK;GVTHNIALLR;HGNALWLNER;HIEIQVLGDK;IAWDDEETR;IAWDDEETRDGFR;KAEVNTIPGFDGVVK;KAEVNTIPGFDGVVKDAEEAVR;LAAELNK;LSQYQEPLHLPGVR;LSSQEAASSFGDDR;MADALDNYVIR;MPVIKPDIANWELSVK;SFGLPSIGR;SYLNMDAIMEAIK;SYLNMDAIMEAIKK;TVAIHSDVDASSVHVK;VDSGIQPGSDISIYYDPMISK;VTEDTSSVLR;VVEEAPSIFLDAETR;VVEEAPSIFL…
2.06114	1.87278	1.97564	1.9286	1.90446	1.96776	0.0779546	1.16152	20	20	58.215	P05166	PCCB	Propionyl-CoA carboxylase beta chain, mitochondrial	AYGGAYDVMSSK;AYNMVDIIHSVVDER;DFFNYLPLSSQDPAPVR;DTSYLFITGPDVVK;EFFEIMPNYAK;FANPFPAAVR;GAVEIIFK;GFVDDIIQPSSTR;GHENVEAAQAEYIEK;IMDQAITVGAPVIGLNDSGGAR;IQEGVESLAGYADIFLR;ISLLLDPGSFVESDMFVEHR;KAYGGAYDVMSSK;LLYAFAEATVPK;LVPELDTIVPLESTK;NKFPGDSVVTGR;RIDAQHK;SVTNEDVTQEELGGAK;TALLGGGQR;TVGIVGNQPK
2.76508	2.44894	2.64617	2.59404	2.49784	2.6098	0.126855	1.18427	25	25	36.112	P05198	EIF2S1	Eukaryotic translation initiation factor 2 subunit 1	ADIEVACYGYEGIDAVK;DEQLESLFQR;ENAEVDGDDDAEEMEAK;ENAEVDGDDDAEEMEAKAED;FPEVEDVVMVNVR;GVFNVQMEPK;GYIDLSK;HAVSDPSILDSLDLNEDEREVLINNINR;HVAEVLEYTK;HVAEVLEYTKDEQLESLFQR;INLIAPPR;LERENAEVDGDDDAEEMEAKAED;LTPQAVK;RGVFNVQMEPK;RLTPQAVK;RPGYGAYDAFK;RVSPEEAIK;TAWVFDDK;TAWVFDDKYK;TEGLSVLSQAMAVIK;TVYSILR;VSPEEAIK;VVTDTDETELAR;YKRPGYGAYDAFK;YVMTTTTLER
2.64947	2.21291	2.43948	2.19316	2.30192	2.30816	0.207015	0.973403	8	6	9.3926	P05204	HMGN2	Non-histone chromosomal protein HMG-17	AEGAGDAK;AEGDAKGDK;EGNNPAENGDAK;KAEGDAK;KAEGDAKGDK;TDQAQKAEGAGDAK;VKDEPQR;VKDEPQRR
-5.55435	-4.85161	-5.37182	-4.91069	-5.02736	-5.26677	-0.389348	1.53011	2	2	17.459	P05230	FGF1	Fibroblast growth factor 1	AILFLPLPVSSD;ILPDGTVDGTR
3.19227	3.0889	3.12029	3.08329	3.06598	3.07131	0.0525373	0.64024	16	16	57.825	P05362	ICAM1	Intercellular adhesion molecule 1	ASVSVTAEDEGTQR;ATPEDNGR;DGTFPLPIGESVTVTR;DLEGTYLCR;ELLLPGNNR;ELLLPGNNRK;EPAVGEPAEVTTTVLVR;GTPMKPNTQATPP;KELLLPGNNR;KELLLPGNNRK;LLGIETPLPK;REPAVGEPAEVTTTVLVR;STQGEVTR;TFLTVYWTPER;VELAPLPSWQPVGK;VTLNGVPAQPLGPR
-0.94311	-1.95887	-1.11241	-1.94809	-1.25829	-1.19769	0.383294	0.692397	3	2	11.514	P05386	RPLP1	Large ribosomal subunit protein P1	AAGVNVEPFWPGLFAK;ALANVNIGSLICNVGAGGPAPAAGAAPAGGPAPSTAAAPAEEK;KEESEESDDDMGFGLFD
2.54295	1.80634	2.34962	1.95752	2.13105	2.1743	0.309352	1.44267	9	8	11.665	P05387	RPLP2	Large ribosomal subunit protein P2	ILDSVGIEADDDR;ILDSVGIEADDDRLNK;KEESEESDDDMGFGLFD;KILDSVGIEADDDR;KILDSVGIEADDDRLNK;LASVPAGGAVAVSAAPGSAAPAAGSAPAAAEEK;NIEDVIAQGIGK;VISELNGK;YVASYLLAALGGNSSPSAK
4.24046	4.13228	4.14252	4.12459	4.20198	4.16735	0.0128994	0.121817	19	19	34.273	P05388;Q8NHW5	RPLP0;RPLP0P6	Large ribosomal subunit protein uL10;Putative ribosomal protein uL10-like	AFLADPSAFVAAAPVAAATTAAPAAAAAPAK;AFLADPSAFVAAAPVAAATTAAPAAAAAPAKVEAK;AGAIAPCEVTVPAQNTGLGPEK;AVVLMGK;CFIVGADNVGSK;DMLLANK;DMLLANKVPAAAR;EDLTEIR;EDLTEIRDMLLANK;EDLTEIRDMLLANKVPAAAR;EESEESDEDMGFGLFD;GHLENNPALEK;GNVGFVFTK;GNVGFVFTKEDLTEIR;GTIEILSDVQLIK;IIQLLDDYPK;TSFFQALGITTK;VEAKEESEESDEDMGFGLFD;VLALSVETDYTFPLAEK
2.53626	2.11626	2.38632	2.32451	2.25473	2.3017	0.167343	1.60095	9	9	14.858	P05413;P02689	FABP3	Fatty acid-binding protein, heart	LGVEFDETTADDR;LGVEFDETTADDRK;MVDAFLGTWK;NFDDYMK;NTEISFK;QVASMTKPTTIIEK;SIVTLDGGK;VDAFLGTWK;WDGQETTLVR
-3.27095	-3.29655	-3.31965	-3.3829	-3.36849	-3.2008	0.0398413	0.252172	3	3	44.395	P05423	POLR3D	DNA-directed RNA polymerase III subunit RPC4	DVSVAELLR;MLEKDDFLDDPGLR;VQLLLGK
4.24129	3.86723	4.08156	3.94746	3.92293	4.0804	0.163215	1.11573	41	41	46.836	P05455	SSB	Lupus La protein	AAQPGSGK;AELMEISEDK;AELMEISEDKTK;AENGDNEK;AKDANNGNLQLR;AKQEQEAK;AREETDKEEPASK;DANNGNLQLR;EDLHILFSNHGEIK;EETDKEEPASK;EGIILFK;EQIKLDEGWVPLEIMIK;ETDLLILFK;ETDLLILFKDDYFAK;EVTWEVLEGEVEK;EVTWEVLEGEVEKEALK;EVTWEVLEGEVEKEALKK;EWLEDKGQVLNIQMR;FVETPGQK;GFPTDATLDDIK;GFPTDATLDDIKEWLEDK;GKVQFQGK;GQVLNIQMR;GSIFVVFDSIESAK;GSIFVVFDSIESAKK;IIEDQQESLNK;KFVETPGQK;KIIEDQQESLNK;KQNKVEAK;LDEGWVPLEIMIK;LEEDAEMK;LTTDFN…
1.80112	1.46099	1.74276	1.66364	1.5697	1.691	0.059639	0.296518	1	1	14.277	P05496;P48201;Q06055	ATP5MC1;ATP5MC3;ATP5MC2	ATP synthase F(0) complex subunit C1, mitochondrial;ATP synthase F(0) complex subunit C3, mitochondrial;ATP synthase F(0) complex subunit C2, mitochondrial	DIDTAAK
2.85581	2.37992	2.70418	2.53583	2.48568	2.62161	0.217386	1.63023	17	17	88.414	P05556	ITGB1	Integrin beta-1	DDLENVK;DKLPQPVQPDPVSHCK;DNTNEIYSGK;GEVFNELVGK;IGFGSFVEK;KDSDSFK;LKPEDITQIQPQQLVLR;LLVFSTDAGFHFAGDGK;LSEGVTISYK;LSENNIQTIFAVTEEFQPVYK;NVLSLTNK;NVLSLTNKGEVFNELVGK;SAVTTVVNPK;SGEPQTFTLK;SLGTDLMNEMR;TVMPYISTTPAK;WDTGENPIYK
0.928814	0.651623	0.794906	0.742817	0.784852	0.759533	0.0560773	0.399655	11	9	76.868	P05771	PRKCB	Protein kinase C beta type	ADPAAGPPPSEGEESTVR;ASVDGWFK;DIKEHAFFR;DLKLDNVMLDSEGHIK;EIQPPYKPK;ENIWDGVTTK;GTDELYAVK;ISQGTKVPEEK;KGTDELYAVK;LDNVMLDSEGHIK;LLSQEEGEYFNVPVPPEGSEANEELR
4.27614	4.14338	4.16828	4.18528	4.17223	4.20801	0.0369606	0.487489	34	19	48.057	P05783;CON__H-INV:HIT000015463	KRT18	Keratin, type I cytoskeletal 18	AQIFANTVDNAR;AQYDELAR;ASLENSLR;DWSHYFK;EELLFMK;ETMQSLNDR;GGMGSGGLATGIAGGLAGMGGIQNEK;GGMGSGGLATGIAGGLAGMGGIQNEKETMQSLNDR;GLQAQIASSGLTVEVDAPK;IVLQIDNAR;KNHEEEVK;KNREELDK;KVIDDTNITR;LAADDFR;LASYLDR;LEAEIATYR;LLEDGEDFNLGDALDSSNSMQTIQK;LQLETEIEALK;LQLETEIEALKEELLFMK;NHEEEVK;QAQEYEALLNIK;QSVENDIHGLR;QSVENDIHGLRK;RLLEDGEDFNLGDALDSSNSMQTIQK;SLETENR;SLETENRR;STFSTNYR;TVQSLEIDLDSMR;VIDDTNITR;VKLEAEIATYR;VK…
0.493597	-0.451639	0.205865	-0.560101	0.0572481	0.113144	0.487672	0.988608	2	2	21.932	P08590;P05976	MYL3;MYL1	Myosin light chain 3;Myosin light chain 1/3, skeletal muscle isoform	EGNGTVMGAELR;VFDKEGNGTVMGAELR
-1.6218	-1.56134	-1.54998	-1.50262	-1.5212	-1.60283	0.00692685	0.0374327	3	2	144.91	P05997	COL5A2	Collagen alpha-2(V) chain	GIVGMPGQR;GPEGPQGQR;GPPGPVGPSGK
2.01594	2.1637	2.07749	2.18229	2.08685	2.08328	-0.067269	0.840628	9	9	40.786	P06132	UROD	Uroporphyrinogen decarboxylase	DGHFALEELAQAGYEVVGLDWTVAPK;EAGLAPVPMIIFAK;FALPYIR;GPSFPEPLR;GPSFPEPLREEQDLER;MEANGLGPQGFPELK;QMLDDFGPHR;WLYQRPQASHQLLR;YIANLGHGLYPDMDPEHVGAFVDAVHK
-4.08871	-3.48899	-4.1769	-3.9418	-3.89217	-3.86681	-0.190671	1.623	6	1	60.761	P06241;P09769	FYN	Tyrosine-protein kinase Fyn	AQFETLQQLVQHYSER;EVLEQVER;GAYSLSIR;GSLLDFLK;LIEDNEYTAR;WTAPEAALYGR
0.944002	1.2648	0.920693	1.2333	1.08904	1.05072	-0.198452	1.61215	9	9	48.766	P06280	GLA	Alpha-galactosidase A	ALLQDKDVIAINQDPLGK;LGFYEWTSR;LQADPQR;NFADIDDSWK;QEIGGPR;QLANYVHSK;SILDWTSFNQER;SYTIAVASLGK;TPTMGWLHWER
5.54167	5.45447	5.50505	5.48149	5.4952	5.53555	-0.0140464	0.134321	40	13	85.696	P06396;REV__Q6TDU7	GSN	Gelsolin	AGALNSNDAFVLK;AGKEPGLQIWR;AQPVQVAEGSEPDGFWEALGGK;AVEVLPK;DPDQTDGLGLSYLSSHIANVER;DSQEEEKTEALTSAK;EDAANRK;EGGQTAPASTR;EPAHLMSLFGGKPMIIYK;EPGLQIWR;EVQGFESATFLGYFK;GGVASGFK;GIRDNER;GKQANTEER;HVVPNEVVVQR;IEGSNKVPVDPATYGQFYGGDSYIILYNYR;KGGVASGFK;KMDAHPPR;LFACSNK;LKATQVSK;MDAHPPR;NWRDPDQTDGLGLSYLSSHIANVER;QANTEERK;QTQVSVLPEGGETPLFK;RTPITVVK;RYIETDPANR;RYIETDPANRDR;SEDCFILDHGK;SEDCFILDHGKDGK;TASDFITK;TEA…
-1.71172	-1.75906	-1.74572	-1.77051	-1.7671	-1.79642	0.0390498	1.08383	13	13	106.16	P06400	RB1	Retinoblastoma-associated protein	AWLTWEK;DLPHAVQETFK;EIDTSTK;IIVTAYK;IPGGNIYISPLK;LFLDHDK;LFLDHDKTLQTDSIDSFETQR;LKIPDHVR;LSIQNFSK;RYEEIYLK;TLQTDSIDSFETQR;VIESFIK;VSSVDGVLGGYIQK
2.11057	0.539537	2.00069	1.7611	0.810004	1.47969	0.51885	0.696094	6	6	12.203	P06454	PTMA	Prothymosin alpha;Prothymosin alpha, N-terminally processed;Thymosin alpha-1	AAEDDEDDDVDTK;AAEDDEDDDVDTKK;EVVEEAENGR;KEVVEEAENGR;RAAEDDEDDDVDTKK;SDAAVDTSSEITTK
-0.66213	-0.661415	-0.663177	-0.5821	-0.578748	-0.684704	-0.043759	0.554352	8	6	34.095	P06493	CDK1	Cyclin-dependent kinase 1	ALGTPNNEVWPEVESLQDYK;DLKPQNLLIDDK;DLKPQNLLIDDKGTIK;HPNIVSLQDVLMQDSR;IGEGTYGVVYK;IRLESEEEGVPSTAIR;KPLFHGDSEIDQLFR;LADFGLAR
5.48171	5.30897	5.3827	5.37185	5.37646	5.39614	0.0287329	0.319816	31	31	56.559	P06576	ATP5F1B	ATP synthase subunit beta, mitochondrial	ADKLAEEHSS;AGAATGR;AHGGYSVFAGVGER;AIAELGIYPAVDPLDSTSR;DQEGQDVLLFIDNIFR;EGNDLYHEMIESGVINLK;FLSQPFQVAEVFTGHMGK;FTQAGSEVSALLGR;GFQQILAGEYDHLPEQAFYMVGPIEEAVAK;GSITSVQAIYVPADDLTDPAPATTFAHLDATTVLSR;IGLFGGAGVGK;IMDPNIVGSEHYDVAR;IMNVIGEPIDER;IMNVIGEPIDERGPIK;IPSAVGYQPTLATDMGTMQER;IPVGPETLGR;KGSITSVQAIYVPADDLTDPAPATTFAHLDATTVLSR;LAEEHSS;LVLEVAQHLGESTVR;LVPLKETIK;QFAPIHAEAPEFMEMSVEQEILVTGIK;SLQDIIAILGMDELS…
-3.92589	-3.82318	-4.06668	-3.88169	-3.8627	-4.02593	-0.0524559	0.311706	3	3	83.267	P06681	C2	Complement C2;Complement C2b fragment;Complement C2a fragment	AVISPGFDVFAK;DFHINLFR;QHLGDVLNFLPL
-1.15735	-2.24537	-2.02119	-1.90544	-2.24624	-1.94802	0.175532	0.174226	2	2	13.242	P06702	S100A9	Protein S100-A9	LGHPDTLNQGEFK;LTWASHEK
2.83834	2.16619	2.71941	2.49836	2.27981	2.39302	0.31722	1.45574	5	5	10.18	P06703	S100A6	Protein S100-A6	EGDKHTLSK;ELTIGSK;LMEDLDR;LMEDLDRNK;LQDAEIAR
1.58774	1.79507	1.59213	1.68702	1.78293	1.65289	-0.118521	1.41665	10	10	25.097	P06730	EIF4E	Eukaryotic translation initiation factor 4E	ATVEPETTPTPNPPTTEEEK;ATVEPETTPTPNPPTTEEEKTESNQEVANPEHYIK;DGIEPMWEDEK;DGIEPMWEDEKNK;DGIEPMWEDEKNKR;EAVTHIGR;IAIWTTECENR;IVIGYQSHADTATK;TWQANLR;WLITLNK
6.57285	6.24995	6.40131	6.26441	6.43923	6.43996	0.0641015	0.298312	38	36	47.168	P06733	ENO1	Alpha-enolase	AAVPSGASTGIYEALELR;AAVPSGASTGIYEALELRDNDK;AAVPSGASTGIYEALELRDNDKTR;AGYTDKVVIGMDVAASEFFR;AVEHINK;DATNVGDEGGFAPNILENK;DATNVGDEGGFAPNILENKEGLELLK;DYPVVSIEDPFDQDDWGAWQK;EGLELLK;FTASAGIQVVGDDLTVTNPK;FTASAGIQVVGDDLTVTNPKR;GNPTVEVDLFTSK;HIADLAGNSEVILPVPAFNVINGGSHAGNK;IDKLMIEMDGTENK;IEEELGSK;IEEELGSKAK;IGAEVYHNLK;KLNVTEQEK;KLNVTEQEKIDK;LAMQEFMILPVGAANFR;LAQANGWGVMVSHR;LMIEMDGTENK;LNVTEQEK;LNVTEQEKIDK;NFR…
5.58916	5.28902	5.46242	5.39474	5.35736	5.45037	0.100243	0.903435	58	48	97.147	P06737	PYGL	Glycogen phosphorylase, liver form	AAPGYHMAK;AKPLTDQEK;AKPLTDQEKR;APNDFNLR;AWELTQK;AWNTMVLK;DFNVGDYIQAVLDR;DFSELEPDK;DFSELEPDKFQNK;DGWQVEEADDWLR;DIINMLFYHDR;DLSQLTK;DRNVATTR;DYYFALAHTVR;EYAQNIWNVEPSDLK;EYYEALPELK;FSQFLETEYK;GAGTVFDAFPDQVAIQLNDTHPALAIPELMR;GIVGVENVAELK;GIVGVENVAELKK;HLEIIYEINQK;HLHFTLVK;IDDVAALDK;IDDVAALDKK;IFVDIEK;IFVDIEKLPWSK;IGEDYVK;IGEDYVKDLSQLTK;IHSDIVK;INPSSMFDVQVK;IRDGWQVEEADDWLR;ISLSNESNK;IVALFPK;LHSFLGDDVF…
5.66029	5.3093	5.54817	5.46892	5.44091	5.54825	0.0876274	0.730977	32	23	63.146	P06744;Q8N196	GPI	Glucose-6-phosphate isomerase	AVLHVALR;DPSAVAK;DVMPEVNK;EFGIDPQNMFEFWDWVGGR;ELQAAGK;EWFLQAAK;FAAYFQQGDMESNGK;GKSTEEAR;HFVALSTNTTK;IEPELDGSAQVTSHDASTNGLINFIK;ILLANFLAQTEALMR;INYTEGR;KELQAAGK;KIEPELDGSAQVTSHDASTNGLINFIK;LFDANKDR;LTPFMLGALVAMYEHK;MFNGEKINYTEGR;MIPCDFLIPVQTQHPIR;MIPCDFLIPVQTQHPIRK;MLVDLAK;NLVTEDVMR;RLFDANK;SELNLRR;SNTPILVDGK;SNTPILVDGKDVMPEVNK;SPEDLER;STEEARK;TFTTQETITNAETAK;TLAQLNPESSLFIIASK;VDHQTGPIVWGEPGTNGQHA…
-0.465002	-0.689529	-0.697064	-0.747311	-0.676957	-0.642738	0.091938	0.537664	11	11	38.177	P06746	POLB	DNA polymerase beta	AASVIAK;EEMLQMQDIVLNEVK;GAESSGDMDVLLTHPSFTSESTK;GFTINEYTIRPLGVTGVAGEPLPVDSEK;IDEFLATGK;KFVDEGIK;KLPGVGTK;LLHQVVEQLQK;TLEDLRK;VHFITDTLSK;YFGDFEK
4.15243	3.73571	4.01329	3.85466	3.83053	3.92303	0.182257	1.46074	19	19	32.575	P06748	NPM1	Nucleophosmin	ADKDYHFK;ADKDYHFKVDNDENEHQLSLR;DELHIVEAEAMNYEGSPIK;DSKPSSTPR;DYHFKVDNDENEHQLSLR;GPSSVEDIK;GQESFKK;LLSISGK;MEDSMDMDMSPLRPQNYLFGCELK;MQASIEK;MSVQPTVSLGGFEITPPVVLR;MTDQEAIQDLWQWR;SAPGGGSK;SKGQESFK;SKGQESFKK;TVSLGAGAK;TVSLGAGAKDELHIVEAEAMNYEGSPIK;VDNDENEHQLSLR;VTLATLK
3.82507	3.44461	3.69751	3.5466	3.6284	3.60638	0.137988	1.22005	39	12	32.95	P06753	TPM3	Tropomyosin alpha-3 chain	AADAEAEVASLNR;AADAEAEVASLNRR;AADESER;AISEELDHALNDMTSI;ALKDEEK;ALKDEEKMELQEIQLK;DAQEKLELAEK;DEEKMELQEIQLK;EDKYEEEIK;GTEDELDK;GTEDELDKYSEALK;GTEDELDKYSEALKDAQEK;HIAEEADR;HIAEEADRK;HIAEEADRKYEEVAR;IQLVEEELDR;IQLVEEELDRAQER;KLVIIEGDLER;KLVIIEGDLERTEER;KYEEVAR;LATALQK;LATALQKLEEAEK;LATALQKLEEAEKAADESER;LDKENALDR;LEEAEKAADESER;LELAEKK;LKEAETR;LKGTEDELDK;LKGTEDELDKYSEALK;LVIIEGDLER;LVIIEGDLERTEER;MELQEI…
3.70288	3.47868	3.5748	3.5153	3.47187	3.5553	0.105341	1.02647	37	37	116.04	P06756	ITGAV	Integrin alpha-V;Integrin alpha-V heavy chain;Integrin alpha-V light chain	AGTQLLAGLR;ALFLYSR;AMLHLQWPYK;AQNQGEGAYEAELIVSIPLQADFIGVVR;ASGDFQTTK;DDPLEFK;DESEFRDK;DYAKDDPLEFK;ENPETEEDVGPVVQHIYELR;FDLQIQSSNLFDK;FGSAIAPLGDLDQDGFNDIAIAAPYGGEDK;FGSAIAPLGDLDQDGFNDIAIAAPYGGEDKK;FSVHQQSEMDTSVK;GATDIDK;GATDIDKNGYPDLIVGAFGVDR;GSDGKLQEVGQVSVSLQR;IYIGDDNPLTLIVK;KIYIGDDNPLTLIVK;LEVSVDSDQK;LEVSVDSDQKK;LNGFEVFAR;LQEVGQVSVSLQR;LTPITIFMEYR;MFLLVGAPK;SAILYVK;SHQWFGASVR;SLLWTETFMNK;SMPPSFG…
3.624	3.35014	3.51399	3.44234	3.40336	3.47186	0.0985775	0.945856	18	18	60.702	P06865	HEXA	Beta-hexosaminidase subunit alpha	AGAVAER;ALLSAPWYLNR;EDIPVNYMK;ELELVTK;EVIEYAR;GFGEDFK;GLETFSQLVWK;GLLLDTSR;GSYNPVTHIYTAQDVK;GYVVWQEVFDNK;GYVVWQEVFDNKVK;IQPDTIIQVWR;ISYGPDWK;KGFGEDFK;KGSYNPVTHIYTAQDVK;LTSDLTFAYER;SNPEIQDFMR;TEIEDFPR
-0.833015	-1.10676	-1.01849	-1.11556	-0.996171	-1.01092	0.0706501	0.374414	7	7	44.002	P07093	SERPINE2	Glia-derived nexin	AKIEVSEDGTK;ASAATTAILIAR;DIVTVANAVFVK;DMIDNLLSPDLIDGVLTR;IEVSEDGTK;LVLVNAVYFK;VLGITDMFDSSK
3.10653	2.69725	2.92576	2.825	2.74809	2.87576	0.157595	0.961826	24	24	52.948	P07099	EPHX1	Epoxide hydrolase 1	DKEETLPLEDGWWGPGTR;DVELLYPVK;EDDSIRPFK;EDDSIRPFKVETSDEEIHDLHQR;ENLGQGWMTQK;FLGLTER;FLGLTERDVELLYPVK;FLSVLER;FSTWTNTEFR;FYKENLGQGWMTQK;GFNSVATAR;GGHFAAFEEPELLAQDIR;GGHFAAFEEPELLAQDIRK;IIPLLTDPK;KFLSVLER;KGFNSVATAR;KQVEILNR;KVISYWR;LISYSYMVR;QVEILNR;VETSDEEIHDLHQR;VFYSLMR;VYVPTGFSAFPFELLHTPEK;YLEDGGLER
3.7716	2.71182	3.65496	3.33401	3.10307	3.27245	0.325037	0.89086	10	9	10.044	P07108	DBI	Acyl-CoA-binding protein	AKWDAWNELK;AYINKVEELK;AYINKVEELKK;GTSKEDAMK;QATVGDINTERPGMLDFTGK;SQAEFEK;TKPSDEEMLFIYGHYK;WDAWNELK;WDAWNELKGTSK
5.25277	5.13555	5.18906	5.20153	5.08509	5.20169	0.0427621	0.395914	20	19	36.638	P07195;P07864;Q6ZMR3	LDHB	L-lactate dehydrogenase B chain	DDEVAQLK;DYSVTANSK;EKLIAPVAEEEATVPNNK;FIIPQIVK;GEMMDLQHGSLFLQTPK;GLTSVINQK;GMYGIENEVFLSLPCILNAR;IHPVSTMVK;IVADKDYSVTANSK;IVVVTAGVR;KSADTLWDIQK;LIAPVAEEEATVPNNK;LKDDEVAQLK;LKDDEVAQLKK;LKGEMMDLQHGSLFLQTPK;MVVESAYEVIK;SADTLWDIQK;SLADELALVDVLEDK;SLADELALVDVLEDKLK;VIGSGCNLDSAR
2.47101	1.83768	2.20773	2.03332	1.95183	2.11262	0.268617	1.29927	10	10	22.088	P07203	GPX1	Glutathione peroxidase 1	DYTQMNELQR;EALPAPSDDATALMTDPK;FLVGPDGVPLR;FLVGPDGVPLRR;GLVVLGFPCNQFGHQENAK;LITWSPVCR;NDVAWNFEK;NEEILNSLK;RFQTIDIEPDIEALLSQGPSCA;YVRPGGGFEPNFMLFEK
1.76202	1.42542	1.5924	1.46385	1.51326	1.62595	0.110455	0.65978	9	3	44.796	P07205	PGK2	Phosphoglycerate kinase 2	ELDYFAK;FHVEEEGK;KELDYFAK;LGDVYVNDAFGTAHR;SLLGKDVLFLK;VDFNVPMK;VLNNMEIGASLFDEEGAK;VSHVSTGGGASLELLEGK;WNTEDKVSHVSTGGGASLELLEGK
0.800697	0.504221	0.636075	0.541985	0.627471	0.546827	0.107533	0.732064	8	8	75.122	P07225	PROS1	Vitamin K-dependent protein S	EVFENDPETDYFYPK;IETISHEDLQR;KVESELIKPINPR;NNLELSTPLK;QLAVLDK;QQASQVLVR;SQDILLSVENTVIYR;VYFAGFPR
5.31497	4.84047	5.15727	4.97565	4.99593	5.08864	0.170232	1.0911	45	45	57.116	P07237	P4HB	Protein disulfide-isomerase	AEGSEIR;ALAPEYAK;DGVVLFK;DGVVLFKK;DHENIVIAK;DVESDSAK;EADDIVNWLK;EADDIVNWLKK;EECPAVR;ENLLDFIK;FFPASADR;FLESGGQDGAGDDDDLEDLEEAEEPDMEEDDDQK;HNQLPLVIEFTEQTAPK;IFGGEIK;IKPHLMSQELPEDWDK;IKPHLMSQELPEDWDKQPVK;ILEFFGLK;ILEFFGLKK;ILFIFIDSDHTDNQR;KEECPAVR;KSNFAEALAAHK;LGETYKDHENIVIAK;LITLEEEMTK;LKAEGSEIR;MDSTANEVEAVK;NFEDVAFDEK;NFEDVAFDEKK;NGDTASPK;NNFEGEVTK;NNFEGEVTKENLLDFIK;QFLQAAEAIDDIPFGITSNSDVFSK;QLAPI…
2.92996	2.781	2.8498	2.82423	2.83975	2.81814	-0.00749079	0.0342144	8	8	20.863	P07305	H1-0	Histone H1.0;Histone H1.0, N-terminally processed	GVGASGSFR;KLAATPK;KSTDHPK;LVTTGVLK;MTENSTSAPAAKPK;TENSTSAPAAKPK;VGENADSQIK;YSDMIVAAIQAEK
0.16127	-0.109722	-0.0626497	-0.0340557	-0.0838175	-0.0552788	0.0711734	0.399965	9	9	11.261	P07311	ACYP1	Acylphosphatase-1	AEGNTLISVDYEIFGK;ANFNNEK;GTVQGQLQGPISK;HMQEWLETR;HTQAEGK;KHTQAEGK;KLGLVGWVQNTDR;LDYSDFQIVK;LGLVGWVQNTDR
-7.68455	-7.17196	-7.34112	-7.42924	-7.41047	-7.32542	-0.0962944	0.374082	1	1	107.98	P07333	CSF1R	Macrophage colony-stimulating factor 1 receptor	VIPGPPALTLVPAELVR
5.80863	5.31617	5.6301	5.49566	5.43664	5.58872	0.164091	0.919707	20	20	44.552	P07339	CTSD	Cathepsin D;Cathepsin D light chain;Cathepsin D heavy chain	AIGAVPLIQGEYMIPCEK;AYWQVHLDQVEVASGLTLCK;DPDAQPGGELMLGGTDSK;EGCEAIVDTGTSLMVGPVDEVR;FDGILGMAYPR;GSLSYLNVTR;ISVNNVLPVFDNLMQQK;LLDIACWIHHK;LSPEDYTLK;LVDQNIFSFYLSR;LVDQNIFSFYLSRDPDAQPGGELMLGGTDSK;QPGITFIAAK;QVFGEATK;QVFGEATKQPGITFIAAK;TMSEVGGSVEDLIAK;VGFAEAAR;VSTLPAITLK;YSQAVPAVTEGPIPEVLK;YYTVFDR;YYTVFDRDNNR
6.5738	6.28394	6.44117	6.35389	6.36867	6.40139	0.108196	1.06738	38	38	38.604	P07355;A6NMY6	ANXA2;ANXA2P2	Annexin A2;Putative annexin A2-like protein	AEDGSVIDYELIDQDAR;AEDGSVIDYELIDQDARDLYDAGVK;AEDGSVIDYELIDQDARDLYDAGVKR;ALLYLCGGDD;AYTNFDAER;AYTNFDAERDALNIETAIK;DALNIETAIK;DIISDTSGDFR;DIISDTSGDFRK;DLYDAGVK;DLYDAGVKR;ELASALK;EMYKTDLEK;EMYKTDLEKDIISDTSGDFR;GVDEVTIVNILTNR;KELASALK;KGTDVPK;KLMVALAK;LMVALAK;LSLEGDHSTPPSAYGSVK;QDIAFAYQR;RAEDGSVIDYELIDQDAR;RAEDGSVIDYELIDQDARDLYDAGVK;SALSGHLETVILGLLK;SEVDMLK;SLYYYIQQDTK;SLYYYIQQDTKGDYQK;STVHEILCK;SVPHL…
3.47514	3.15314	3.34425	3.27919	3.18495	3.30454	0.133011	1.11098	31	31	81.889	P07384	CAPN1	Calpain-1 catalytic subunit	APSDLYQIILK;DEAFPPVPQSLGYK;DFFLANASR;DLGPNSSK;DMETIGFAVYEVPPELVGQPAVHLK;EGDFVLR;FRLPPGEYVVVPSTFEPNKEGDFVLR;GHAYSVTGAK;GQVVSLIR;KAPSDLYQIILK;KWNTTLYEGTWR;LEICNLTPDALK;LPPGEYVVVPSTFEPNK;LPPGEYVVVPSTFEPNKEGDFVLR;LVFVHSAEGNEFWSALLEK;LYELIITR;MAIESAGFK;MEDGEFWMSFR;NYLSIFR;NYPATFWVNPQFK;QLAGEDMEISVK;RPTELLSNPQFIVDGATR;SAGTVELDDQIQANLPDEQVLSEEEIDENFK;SEEIITPVYCTGVSAQVQK;SEQFINLR;SGSMSAYEMR;TLDTDLDGVVTFD…
3.13287	2.6716	3.04981	2.89922	2.94751	2.8571	0.153783	1.41212	21	4	49.67	P07437	TUBB	Tubulin beta chain	AILVDLEPGTMDSVR;ALTVPELTQQVFDAK;EVDEQMLNVQNK;FPGQLNADLR;FPGQLNADLRK;FWEVISDEHGIDPTGTYHGDSDLQLDR;GHYTEGAELVDSVLDVVR;GHYTEGAELVDSVLDVVRK;IMNTFSVVPSPK;IREEYPDR;ISEQFTAMFR;ISVYYNEATGGK;KLAVNMVPFPR;LAVNMVPFPR;LHFFMPGFAPLTSR;LTTPTYGDLNHLVSATMSGVTTCLR;MAVTFIGNSTAIQELFK;MSMKEVDEQMLNVQNK;NSSYFVEWIPNNVK;SGPFGQIFRPDNFVFGQSGAGNNWAK;YLTVAAVFR
-2.72246	-2.85155	-2.89233	-2.80052	-2.88684	-2.86037	-0.000630061	0.00295338	2	2	29.557	P07451	CA3	Carbonic anhydrase 3	GGPLPGPYR;VVFDDTYDR
1.48383	0.949989	1.30132	1.12991	1.05654	1.38229	0.24732	0.962669	10	10	58.112	P07602	PSAP	Prosaposin;Saposin-A;Saposin-B-Val;Saposin-B;Saposin-C;Saposin-D	EILDAFDK;EMPMQTLVPAK;GCSFLPDPYQK;HLAELNHQK;KLVGYLDR;LPALTVHVTQPK;LVGYLDR;NVIPALELVEPIK;NVIPALELVEPIKK;QEILAALEK
3.89081	3.66665	3.81487	3.72442	3.76274	3.77692	0.0702667	0.84104	23	23	63.137	P07686	HEXB	Beta-hexosaminidase subunit beta;Beta-hexosaminidase subunit beta chain B;Beta-hexosaminidase subunit beta chain A	ASAVGER;DMDDAYDR;DSAYPEELSR;EISEVFPDQFIHLGGDEVEFK;EPVAVLK;GFGTDFK;GFGTDFKK;GIAAQPLYAGYCNHENM;GSIVWQEVFDDK;GSIVWQEVFDDKAK;GSYSLSHVYTPNDVR;KLESFYIQK;KYYKVEPLDFGGTQK;LAPGTIVEVWK;LAPGTIVEVWKDSAYPEELSR;LESFYIQK;MVIEYAR;QKGFGTDFK;TLDAMAFNK;VEPLDFGGTQK;VLDIIATINK;VLPEFDTPGHTLSWGK;YYKVEPLDFGGTQK
-2.10226	-2.20217	-2.13472	-2.07207	-2.16465	-2.19256	-0.00562414	0.0396204	4	3	37.564	P07711;Q5NE16	CTSL;CTSL3P	Procathepsin L;Cathepsin L;Cathepsin L heavy chain;Cathepsin L light chain;Putative inactive cathepsin L-like protein CTSL3P	EKGYVTPVK;GYVTPVK;MIELHNQEYR;NSWGEEWGMGGYVK
3.78438	3.38709	3.61431	3.50055	3.51516	3.58171	0.141701	1.10018	12	12	15.054	P07737;CON__P02584	PFN1	Profilin-1	AGWNAYIDNLMADGTCQDAAIVGYK;CYEMASHLR;DSLLQDGEFSMDLR;DSPSVWAAVPGK;EGVHGGLINK;EGVHGGLINKK;SSFYVNGLTLGGQK;STGGAPTFNVTVTK;TDKTLVLLMGK;TFVNITPAEVGVLVGK;TFVNITPAEVGVLVGKDR;TLVLLMGK
0.355087	0.322496	0.353887	0.233473	0.294442	0.352287	0.0664431	0.892104	8	8	30.005	P07738	BPGM	Bisphosphoglycerate mutase	AVGPHQFLGDQEAIQAAIK;EQMALNHGEEQVR;HYGALIGLNR;IAPEVLR;KVEDQGK;LLPYWNER;LNSEGMEEAR;SYNVTPPPIEESHPYYQEIYNDRR
2.88805	2.49487	2.74691	2.5954	2.64114	2.70322	0.137761	1.0594	12	12	19.608	P07741	APRT	Adenine phosphoribosyltransferase	AAIGLLAR;ADSELQLVEQR;AELEIQK;AELEIQKDALEPGQR;DALEPGQR;DISPVLK;DISPVLKDPASFR;GKLPGPTLWASYSLEYGK;IDYIAGLDSR;LAPVPFFSLLQYE;LPGPTLWASYSLEYGK;SFPDFPTPGVVFR
4.38631	4.14412	4.2376	4.19329	4.1569	4.24437	0.0894922	0.740168	65	64	170.59	P07814	EPRS1	Bifunctional glutamate/proline--tRNA ligase;Glutamate--tRNA ligase;Proline--tRNA ligase	AALLNQHYQVNFK;AIQGGTSHHLGQNFSK;APKDQVDIAVQELLQLK;APKEDVDAAVK;AYVDDTPAEQMK;DNYSPGWK;DQDLEPGAPSMGAK;DQVDIAVQELLQLK;EDVDAAVK;EENLADWYSQVITK;EKTHVADFAPEVAWVTR;EMPTSGSK;ERPTPSLNNNCTTSEDSLVLYNR;EVIPVNVPEAQEEMK;EVIPVNVPEAQEEMKEVAK;EYIPGQPPLSQSSDSSPTR;EYIPGQPPLSQSSDSSPTRNSEPAGLETPEAK;FAGGDYTTTIEAFISASGR;FDDTNPEK;FDDTNPEKEKEDFEK;FNHWELK;FPPEASGYLHIGHAK;FVELPGAEMGK;GDIIQLQR;GMTVEGLK;GNAAWQEQLK;HPQPFLR;IWAF…
3.41852	3.40153	3.37701	3.38598	3.41307	3.38451	-0.00566419	0.117209	12	12	37.821	P07858	CTSB	Cathepsin B;Cathepsin B light chain;Cathepsin B heavy chain	DIMAEIYK;EQWPQCPTIK;GQDHCGIESEVVAGIPR;HYGYNSYSVSNSEK;HYGYNSYSVSNSEKDIMAEIYK;ICEPGYSPTYK;LPASFDAR;NGPVEGAFSVYSDFLLYK;QDKHYGYNSYSVSNSEK;QDKHYGYNSYSVSNSEKDIMAEIYK;SGVYQHVTGEMMGGHAIR;VMFTEDLKLPASFDAR
5.10085	4.84286	5.02289	4.98764	4.9079	5.02237	0.076011	0.823329	53	28	84.659	P07900;Q14568	HSP90AA1	Heat shock protein HSP 90-alpha	ADLINNLGTIAK;AEADKNDK;ALLFVPR;APFDLFENR;APFDLFENRK;DNSTMGYMAAK;DQVANSAFVER;EDKEEEK;EDQTEYLEER;EDQTEYLEERR;EGLELPEDEEEK;EGLELPEDEEEKK;EGLELPEDEEEKKK;EKYIDQEELNK;ELHINLIPNK;ELHINLIPNKQDR;ELISNSSDALDK;ELISNSSDALDKIR;EMLQQSK;FYEQFSK;GVVDSEDLPLNISR;HFSVEGQLEFR;HGLEVIYMIEPIDEYCVQQLK;HIYYITGETK;HLEINPDHSIIETLR;HNDDEQYAWESSAGGSFTVR;HSQFIGYPITLFVEK;HSQFIGYPITLFVEKER;IMKDILEK;IRYESLTDPSK;KFYEQFSK;KHLEINPDH…
1.11172	0.994658	1.01048	1.01185	0.985299	1.01653	0.0353107	0.399429	9	9	43.363	P07902	GALT	Galactose-1-phosphate uridylyltransferase	ALPEVHYHLGQK;DLTPEQAAER;KFMVGYEMLAQAQR;QQASEADAAAATFR;RLPELTPAER;RLPELTPAERDDLASIMK;RPWQGQVEPQLLK;SQHGEPLLMEYSR;YNPLQDEWVLVSAHR
5.20658	4.91842	5.06948	5.02817	4.93917	5.04047	0.109109	0.888165	24	24	33.67	P07910;O60812;B2RXH8;B7ZW38;P0DMR1;Q86SE5	HNRNPC	Heterogeneous nuclear ribonucleoproteins C1/C2	AAVAGEDGR;ASNVTNK;AVVPSKR;GDDLQAIK;GDDLQAIKK;GDDQLELIK;GDDQLELIKDDEK;GFAFVQYVNER;IEKEQSK;IVGCSVHK;KDETNVK;KSDVEAIFSK;LKGDDLQAIK;LKGDDLQAIKK;MIAGQVLDINLAAEPK;MYSYPAR;NDKSEEEQSSSSVK;QKVDSLLENLEK;SDVEAIFSK;SEEEQSSSSVK;VDSLLENLEK;VFIGNLNTLVVK;VPPPPPIAR;VSGNTSR
-4.11153	-4.25439	-3.93697	-3.76759	-4.07636	-4.01313	-0.130905	0.463707	3	3	10.739	P07919;A0A096LP55	UQCRH;UQCRHL	Cytochrome b-c1 complex subunit 6, mitochondrial;Cytochrome b-c1 complex subunit 6-like, mitochondrial	GLEDEQK;MLTESGDPEEEEEEEEELVDPLTTVR;SHTEEDCTEELFDFLHAR
2.96451	2.8859	2.83514	2.80677	2.81871	2.79268	0.0566584	0.459926	38	38	198.04	P07942	LAMB1	Laminin subunit beta-1	AEMLLEEAK;AEMLLEEAKR;AEMLQNEAK;ALDPAFK;AQVAAEK;AVITVQRPGR;DILAQSPAAEPLK;DRVEDVMMER;DVTEMMAQVEVK;EALEEAEK;EKQEEQAR;ELAEQLEFIK;ELDSLQTEAESLDNTVK;ETVDSVER;IEDPYSPR;IPSWTGAGFVR;KAAQNSGEAEYIEK;KAEMLQNEAK;KTEESADAR;KVENLIAK;KVSEIKDILAQSPAAEPLK;KYEDNQR;LHTLGDNLLDSR;LLDELAGK;LRADEAK;NFLTQDSADLDSIEAVANEVLK;NIGNLFEEAEK;QSAEDILLK;SLDIFTVGGSGDGVVTNSAWETFQR;TFRPAAMLIER;TLDGELDEK;TLDGELDEKYK;TLLAQANSK;VENLIAK;…
0.729357	0.785629	0.687907	0.77021	0.729966	0.752468	-0.0482241	1.27558	11	4	60.801	P07947	YES1	Tyrosine-protein kinase Yes	AANILVGENLVCK;AQFDTLQK;EVLEQVER;FQIINNTEGDWWEAR;GAYSLSIR;GSLLDFLK;LIEDNEYTAR;LLLNPGNQR;SDVWSFGILQTELVTK;VPYPGMVNR;WTAPEAALYGR
1.08268	0.997515	0.974759	0.956621	1.06725	1.04457	-0.0160414	0.11442	10	9	58.573	P07948;P08631	LYN	Tyrosine-protein kinase Lyn	DFDPVHGDVIK;EEPIYIITEYMAK;EGFIPSNYVAK;GKDSLSDDGVDLK;GSLLDFLK;LIDFSAQIAEGMAYIER;LNTLETEEWFFK;QLLAPGNSAGAFLIR;VIEDNEYTAR;VLEEHGEWWK
1.09844	0.585112	0.860999	0.701353	0.725099	0.711412	0.210659	1.11239	39	5	32.85	P07951	TPM2	Tropomyosin beta chain	AADESER;AEQAEADK;AEQAEADKK;AEVAESK;AISEELDNALNDITSL;AMKDEEK;AMKDEEKMELQEMQLK;ATDAEADVASLNR;ATDAEADVASLNRR;EAQEKLEQAEK;EDKYEEEIK;EDKYEEEIKLLEEK;GTEDEVEK;GTEDEVEKYSESVK;HIAEDSDR;IQLVEEELDR;IQLVEEELDRAQER;IVTNNLK;KATDAEADVASLNR;KATDAEADVASLNRR;KLVILEGELER;KLVILEGELERSEER;KYEEVAR;LATALQK;LATALQKLEEAEK;LATALQKLEEAEKAADESER;LEEAEKAADESER;LKEAETR;LKGTEDEVEK;LKGTEDEVEKYSESVK;LVILEGELER;LVILEGELERSEER;MEL…
4.14497	3.96106	4.02227	3.96766	4.0165	4.02036	0.0534191	0.476607	26	26	54.636	P07954	FH	Fumarate hydratase, mitochondrial	AAAEVNQDYGLDPK;AADEVAEGK;AFGILKR;AIEMLGGELGSK;EFAQIIK;ETAIELGYLTAEQFDEWVKPK;FEALAAHDALVELSGAMNTTACSLMKIANDIR;FLGSGPR;IANAIMK;IEYDTFGELK;IEYDTFGELKVPNDK;IEYDTFGELKVPNDKYYGAQTVR;IGGVTER;IPVHPNDHVNK;IYELAAGGTAVGTGLNTR;LHDALDAK;LMNESLMLVTALNPHIGYDK;LNDHFPLVVWQTGSGTQTNMNVNEVISNR;MPTPVIK;NVLHSAR;SGLGELILPENEPGSSIMPGK;SQSSNDTFPTAMHIAAAIEVHEVLLPGLQK;THTQDAVPLTLGQEFSGYVQQVK;VAALTGLPFVTAPNK;VPNDKYYGAQTVR;Y…
-4.29572	-4.40899	-4.40503	-4.38071	-4.47639	-4.42328	0.0667896	0.708079	3	3	32.562	P07992	ERCC1	DNA excision repair protein ERCC-1	AYEQKPADLLMEK;LEQDFVSR;LFDVLHEPFLK
-2.41297	-2.41712	-2.57861	-2.42133	-2.45995	-2.50977	-0.0391178	0.289063	6	6	129.38	P07996;CON__Q28194;P35442	THBS1	Thrombospondin-1	AQGYSGLSVK;FVFGTTPEDILR;GGVNDNFQGVLQNVR;GPDPSSPAFR;IEDANLIPPVPDDKFQDLVDAVR;TLWHDPR
-0.857164	-0.647774	-0.830686	-0.687647	-0.53453	-0.680481	-0.183251	1.48936	2	1	154.79	P08069	IGF1R	Insulin-like growth factor 1 receptor;Insulin-like growth factor 1 receptor alpha chain;Insulin-like growth factor 1 receptor beta chain	DIYETDYYR;GVVKDEPETR
1.42474	1.05274	1.59862	1.41112	1.40592	1.32635	0.158766	1.17045	8	8	129.31	P08123	COL1A2	Collagen alpha-2(I) chain	AVILQGSNDVELVAEGNSR;GDQGPVGR;GEAGAAGPAGPAGPR;GETGPSGPVGPAGAVGPR;GPAGPSGPAGK;GPSGPQGIR;GVVGPQGAR;SLNNQIETLLTPEGSR
6.10898	5.85896	6.00471	5.93414	5.93713	6.00588	0.071991	0.714279	61	61	75.872	P08133	ANXA6	Annexin A6	AINEAYK;AINEAYKEDYHK;AKPAQGAK;ALIEILATR;ALLALCGGED;AMEGAGTDEK;CLIEILASR;DAFVAIVQSVK;DAISGIGTDEK;DAYERDLEADIIGDTSGHFQK;DLEADIIGDTSGHFQK;DLIADLK;DLMTDLK;DLMTDLKSEISGDLAR;EAILDIITSR;EDAQVAAEILEIADTPSGDK;EDAQVAAEILEIADTPSGDKTSLETR;EEDDVVSEDLVQQDVQDLYEAGELK;EEGGENLDQAR;EEGGENLDQAREDAQVAAEILEIADTPSGDK;EEGGENLDQAREDAQVAAEILEIADTPSGDKTSLETR;EFIEKYDK;EIKDAISGIGTDEK;EMSGDVR;GAGTDEK;GELSGDFEK;GFGSDKEAILDIIT…
-3.36028	-3.73526	-3.36738	-3.51803	-3.58257	-3.40994	0.133736	1.23754	2	2	41.4	P08174	CD55	Complement decay-accelerating factor	LNSASLK;TSFPEDTVITYK
4.42043	4.10064	4.26817	4.2021	4.20591	4.24735	0.0961978	0.809753	28	28	67.993	P08195	SLC3A2	Amino acid transporter heavy chain SLC3A2	ADLLLSTQPGR;ADLLLSTQPGREEGSPLELER;DDVAQTDLLQIDPNFGSK;DDVAQTDLLQIDPNFGSKEDFDSLLQSAK;DLLLTSSYLSDSGSTGEHTK;EDFDSLLQSAK;EEGSPLELER;EVELNELEPEKQPMNAASGAAMSLAGAEK;FTGLSKEELLK;GENSWFSTQVDTVATK;GLVLGPIHK;GQSEDPGSLLSLFR;GRLDYLSSLK;HWDQNER;IGDLQAFQGHGAGNLAGLK;IKVAEDEAEAAAAAK;LDYLSSLK;LEPHEGLLLR;LKLEPHEGLLLR;LLTSFLPAQLLR;MELQPPEASIAVVSIPR;NQKDDVAQTDLLQIDPNFGSK;QPMNAASGAAMSLAGAEK;SLLHGDFHAFSAGPGLFSYIR;VAEDEA…
3.07174	2.87947	2.99043	2.9667	2.90268	2.97225	0.0516936	0.49368	19	19	74.731	P08236	GUSB	Beta-glucuronidase	ADFSDNR;ADFSDNRR;DKNHPAVVMWSVANEPASHLESAGYYLK;ELDGLWSFR;EVILPER;GFDWPLLVK;GFEEQWYR;GKGFDWPLLVK;HEDADIR;HFVGWVWYER;LLDAENK;MVIAHTK;RGFEEQWYR;RPLWESGPTVDMPVPSSFNDISQDWR;SAAFLLR;SLDPSRPVTFVSNSNYAADK;SLLEQYHLGLDQK;SLLEQYHLGLDQKR;WLGANAFR
3.58487	3.42281	3.50216	3.48221	3.44948	3.50228	0.0470727	0.625329	31	28	85.182	P08237	PFKM	ATP-dependent 6-phosphofructokinase, muscle type	AIAVLTSGGDAQGMNAAVR;ALVFQPVAELK;ALVFQPVAELKDQTDFEHR;ALVFQPVAELKDQTDFEHRIPK;AMNWMSGK;DLQANVEHLVQK;DQTDFEHR;GGTPSAFDR;GITNLCVIGGDGSLTGADTFR;GQIEEAGWSYVGGWTGQGGSK;IGLIQGNR;IMEIVDAITTTAQSHQR;ITDEEATK;KFDEALK;KNVLGHMQQGGSPTPFDR;KSFEQISANITK;LNIIIVAEGAIDK;LNIIIVAEGAIDKNGKPITSEDIK;NVLGHMQQGGSPTPFDR;QSAAGTK;SEWSDLLSDLQK;SFEQISANITK;SFMNNWEVYK;SGSHTVAVMNVGAPAAGMNAAVR;TFVLEVMGR;THEEHHAAK;VFFVHEGYQGLVDGGDHI…
6.12828	5.82943	5.99282	5.90261	5.90201	5.9807	0.11112	1.0125	54	25	83.263	P08238;Q58FF7	HSP90AB1	Heat shock protein HSP 90-beta	ADHGEPIGR;ADLINNLGTIAK;AEADKNDK;ALLFIPR;APFDLFENK;APFDLFENKK;DNSTMGYMMAK;EDQTEYLEER;EDQTEYLEERR;EGLELPEDEEEK;EGLELPEDEEEKK;EGLELPEDEEEKKK;EKYIDQEELNK;ELISNASDALDK;ELISNASDALDKIR;ELKIDIIPNPQER;EMLQQSK;EQVANSAFVER;FYEAFSK;GFEVVYMTEPIDEYCVQQLK;GVVDSEDLPLNISR;HFSVEGQLEFR;HLEINPDHPIVETLR;HNDDEQYAWESSAGGSFTVR;IDIIPNPQER;IEDVGSDEEDDSGK;IEDVGSDEEDDSGKDK;IEDVGSDEEDDSGKDKK;IRYESLTDPSK;KFYEAFSK;KHLEINPDHPIV…
2.38941	2.47366	2.5687	2.34548	2.3397	2.33813	0.10993	0.868407	23	23	69.81	P08240	SRPRA	Signal recognition particle receptor subunit alpha	AGAVEQLR;ALADHSMAQTPR;AVVAALMK;DAAGIAMEAIAFAR;DIMDAQR;EAEESSK;EDMESVLDK;EGSDGPLATSKPVPAEK;EVLDYSTPTTNGTPEAALSEDINLIR;GGNNSFTHEALTLK;GTLGGMFGMLK;ILTLTYVDK;KFEDSEK;LIDDVHR;LSALHPPEK;MLDFFTIFSK;MQDNAPLMTALAK;NQGFDVVLVDTAGR;QALQESLVQILQPQR;SGLPVGPENGVELSKEELIR;SLSREDMESVLDK;TMVQLFEK;VMGTFSTVTSTVK
0.481691	0.326471	0.430968	0.357996	0.379355	0.41431	0.0657489	1.33777	14	14	64.369	P08243	ASNS	Asparagine synthetase [glutamine-hydrolyzing]	ADWLSHYWMPK;APSPEKAEEESER;DTYGVRPLFK;EAFSDGITSVK;EAQVQYPLQTFAIGMEDSPDLLAAR;EILWRPK;ELYLFDVLR;ETFEDSNLIPK;HSATPFLK;LAVVDPLFGMQPIR;LFPGFEIETVK;TTAAHGLELR;VPFLDHR;WINATDPSAR
-2.50546	-2.42984	-2.52073	-2.45565	-2.36351	-2.45726	-0.111041	1.32939	3	3	33.845	P08247	SYP	Synaptophysin	APPGAPEK;MATDPENIIK;VVKEPLGFVK
2.75816	2.28655	2.59759	2.436	2.45916	2.59306	0.136779	0.777697	12	6	25.631	P08263;P09210;Q7RTV2	GSTA1;GSTA2	Glutathione S-transferase A1;Glutathione S-transferase A1, N-terminally processed;Glutathione S-transferase A2	AILNYIASK;FLQPGSPR;ISNLPTVK;KFLQPGSPR;KPPMDEK;LHYFNAR;SAEDLDK;SAEDLDKLR;SHGQDYLVGNK;SLEEARK;WLLAAAGVEFEEK;YFPAFEK
-1.15213	-1.04112	-1.03922	-0.980827	-1.1747	-1.04711	-0.0211722	0.116794	4	4	25.851	P08294	SOD3	Extracellular superoxide dismutase [Cu-Zn]	AGLAASLAGPHSIVGR;AVVVHAGEDDLGR;VTEIWQEVMQR;VTGVVLFR
1.68509	1.65643	1.56039	1.615	1.63812	1.59534	-0.0133044	0.112278	15	15	39.33	P08397	HMBS	Porphobilinogen deaminase	AKDQDILDLVGVLHDPETLLR;ASYPGLQFEIIAMSTTGDK;DQDILDLVGVLHDPETLLR;ELEHALEK;ELEHALEKNEVDLVVHSLK;ENPHDAVVFHPK;FPHLEFR;ILDTALSK;IQTDSVVATLK;KFPHLEFR;KLDEQQEFSAIILATAGLQR;LDEQQEFSAIILATAGLQR;NEVDLVVHSLK;SVVGTSSLR;TLETLPEK
-0.868319	-0.76281	-1.09075	-0.891281	-0.752879	-0.928028	-0.0762355	0.329426	7	7	85.513	P08473	MME	Neprilysin	DGDLVDWWTQQSASNFK;EVFIQTLDDLTWMDAETK;GGEPLLK;HVVEDLIAQIR;LLPDIYGWPVATENWEQK;LLPGLDLNHK;LPIDENQLALEMNK
3.96561	3.70121	3.88753	3.79172	3.78342	3.81979	0.103815	1.38322	21	21	43.295	P08559;P29803	PDHA1	Pyruvate dehydrogenase E1 component subunit alpha, somatic form, mitochondrial	AAASTDYYK;AAASTDYYKR;AHGFTFTR;EEIQEVR;EIEDAAQFATADPEPPLEELGYHIYSSDPPFEVR;EILAELTGR;EILAELTGRK;GANQWIK;GDFIPGLR;GGSMHMYAK;GPILMELQTYR;KEIEDAAQFATADPEPPLEELGYHIYSSDPPFEVR;LEEGPPVTTVLTR;MVNSNLASVEELK;MVNSNLASVEELKEIDVEVR;MVNSNLASVEELKEIDVEVRK;RGDFIPGLR;SDPIMLLK;SKSDPIMLLK;TREEIQEVR;YGMGTSVER
-0.125149	-0.0749989	-0.0557051	-0.10556	-0.103421	-0.121483	0.0126883	0.225502	7	7	167.55	P08572	COL4A2	Collagen alpha-2(IV) chain;Canstatin	GEQGFMGNTGPTGAVGDR;GLDGYQGPDGPR;GLPGEVLGAQPGPR;IAVQPGTVGPQGR;IGLPGGK;SVSIGYLLVK;SYWLSTTAPLPMMPVAEDEIKPYISR
1.56651	1.29548	1.52908	1.37429	1.33451	1.46381	0.121373	1.06996	10	10	35.422	P08574	CYC1	Cytochrome c1, heme protein, mitochondrial	AANNGALPPDLSYIVR;ELAAEVEVQDGPNEDGEMFMRPGK;GLLSSLDHTSIR;GLLSSLDHTSIRR;HGGEDYVFSLLTGYCEPPTGVSLR;LAYRPPK;LFDYFPKPYPNSEAAR;RGFQVYK;WASEPEHDHR;WASEPEHDHRK
0.922745	0.555906	0.778558	0.70644	0.604758	0.710459	0.139451	0.994933	10	7	25.486	P08579	SNRPB2	U2 small nuclear ribonucleoprotein B	DALQGFK;ELGSSTNALR;GQAFVIFK;GTFADKEK;HDIAFVEFENDGQAGAAR;ITPSHAMK;QLQGFPFYGKPMR;TDSDIISK;TVEQTATTTNK
0.559565	0.563093	0.533309	0.524252	0.559342	0.542332	-0.0147057	0.254291	15	14	155.54	P08581	MET	Hepatocyte growth factor receptor	AEMRPSFSELVSR;AFFMLDGILSK;DLGSELVR;DLIGFGLQVAK;ETSIFSYREDPIVYEIHPTK;GDLTIANLGTSEGR;GNDIDPEAVK;GNDIDPEAVKGEVLK;HISIGGK;ITDIGEVSQFLTEGIIMK;MVINVHEAGR;SEGSPLVVLPYMK;VADFGLAR;WMALESLQTQK;YVNDFFNK
-0.744539	-0.506254	-0.572185	-0.513857	-0.440078	-0.487749	-0.111614	0.581505	7	7	80.214	P08582	MELTF	Melanotransferrin	ADTDGGLIFR;AQDLFGDDHNK;AVPVGEK;IQAEQVDAVTLSGEDIYTAGK;TVGWNVPVGYLVESGR;VPAHAVVVR;YYDYSGAFR
2.75345	2.44843	2.63757	2.54226	2.49446	2.58522	0.13098	1.2609	21	21	51.556	P08621	SNRNP70	U1 small nuclear ribonucleoprotein 70 kDa	DAPPPTR;DMHSAYK;DPIPYLPPLEK;EFEDPRDAPPPTR;EFEVYGPIK;EFEVYGPIKR;GGADVNIR;GGGGDMAEPSEAGDAPPDDGPPGELGPDGPDGPEEK;GGGGGQDNGLEGLGNDSR;GYAFIEYEHER;GYAFIEYEHERDMHSAYK;IHMVYSK;LGGGLGGTR;MWDPHNDPNAQGDAFK;QQEVETELK;REFEVYGPIKR;RGGADVNIR;RQQEVETELK;VLVDVER;VNYDTTESK;YDERPGPSPLPHR
-0.725346	-0.75276	-0.738936	-0.756155	-0.786801	-0.709948	0.0162474	0.287446	7	7	114.54	P08648	ITGA5	Integrin alpha-5;Integrin alpha-5 heavy chain;Integrin alpha-5 light chain	AGASLWGGLR;AQLKPPATSDA;FTVPHLR;SLPYGTAMEK;SSASSGPQILK;TPDGRPQEVGR;VTAPPEAEYSGLVR
-1.47975	-1.04314	-1.38145	-1.26608	-1.08581	-1.24585	-0.257897	1.69543	3	2	55.674	P08651	NFIC	Nuclear factor 1 C-type	AVKDELLGEKPEVK;EDFVLSITGK;GIPLESTDGER
7.71762	7.13186	7.51532	7.34273	7.3101	7.34355	0.222982	1.22624	55	48	53.651	P08670;P17661;P12036;P07197;P07196	VIM	Vimentin	DGQVINETSQHHDDLE;DNLAEDIMR;EEAENTLQSFR;EEAENTLQSFRQDVDNASLAR;EKLQEEMLQR;EKLQEEMLQREEAENTLQSFR;EMEENFAVEAANYQDTIGR;ETNLDSLPLVDTHSK;ETNLDSLPLVDTHSKR;EYQDLLNVK;FADLSEAANR;FANYIDK;FANYIDKVR;FLEQQNK;GTNESLER;ILLAELEQLK;ILLAELEQLKGQGK;ISLPLPNFSSLNLR;KLLEGEESR;KVESLQEEIAFLK;KVESLQEEIAFLKK;LGDLYEEEMR;LGDLYEEEMRELR;LHEEEIQELQAQIQEQHVQIDVDVSKPDLTAALR;LLEGEESR;LLQDSVDFSLADAINTEFK;LQDEIQNMK;LQDEIQNMKEEMAR;LQ…
2.17553	1.7483	1.96705	1.81954	1.78223	1.92956	0.202037	1.20333	11	11	15.55	P08708	RPS17	Small ribosomal subunit protein eS17	DNYVPEVSALDQEIIEVDPDTK;DNYVPEVSALDQEIIEVDPDTKEMLK;IAGYVTHLMK;LGNDFHTNK;LGNDFHTNKR;LLDFGSLSNLQVTQPTVGMNFK;LQEEERER;RDNYVPEVSALDQEIIEVDPDTK;RDNYVPEVSALDQEIIEVDPDTKEMLK;VCEEIAIIPSK;VCEEIAIIPSKK
-1.27443	-1.56082	-1.62617	-1.50901	-1.61018	-1.59515	0.118006	0.482215	42	1	44.105	P08727	KRT19	Keratin, type I cytoskeletal 19	AALEDTLAETEAR;ALEAANGELEVK;APSIHGGSGGR;DAEAWFTSR;DKILGATIENSR;DYSHYYTTIQDLR;DYSHYYTTIQDLRDK;EELAYLK;EVAGHTEQLQMSR;FETEQALR;FGPGVAFR;FVSSSSSGAYGGGYGGVLTASDGLLAGNEK;GQVGGQVSVEVDSAPGTDLAK;GVSVSSAR;ILGATIENSR;IRDWYQK;IVLQIDNAR;KDAEAWFTSR;KNHEEEISTLR;LAADDFR;LASYLDK;LASYLDKVR;LEQEIATYR;LTMQNLNDR;MSVEADINGLR;MSVEADINGLRR;NHEEEISTLR;QNQEYQR;QSSATSSFGGLGGGSVR;RVLDELTLAR;SEVTDLR;SEVTDLRR;SLLEGQEDHYNNLSASK…
-0.113934	-0.104099	-0.238366	-0.168619	-0.118953	-0.136328	-0.0525678	0.545323	14	6	40.532	P08754	GNAI3	Guanine nucleotide-binding protein G(i) subunit alpha-3	EIYTHFTCATDTK;EYQLNDSASYYLNDLDR;IDFGEAAR;IIHEDGYSEDECK;ISQSNYIPTQQDVLR;KDLFEEK;LFDSICNNK;LKIDFGEAAR;LLLLGAGESGK;MFDVGGQR;NLREDGEK;NVQFVFDAVTDVIIK;QLFVLAGSAEEGVMTPELAGVIK;TTGIVETHFTFK
5.55777	5.28642	5.45907	5.36593	5.43635	5.44058	0.0652536	0.620955	35	35	35.936	P08758	ANXA5	Annexin A5	ADAETLR;ADAETLRK;ALLLLCGEDD;DLLDDLK;DLLDDLKSELTGK;DLLDDLKSELTGKFEK;DPDAGIDEAQVEQDAQALFQAGELK;ETSGNLEQLLLAVVK;FITIFGTR;GAGTDDHTLIR;GAGTNEK;GDTSGDYK;GDTSGDYKK;GLGTDEESILTLLTSR;GTVTDFPGFDER;GTVTDFPGFDERADAETLR;GTVTDFPGFDERADAETLRK;KNFATSLYSMIK;LIVALMKPSR;LYDAYELK;MLVVLLQANR;MLVVLLQANRDPDAGIDEAQVEQDAQALFQAGELK;NFATSLYSMIK;QEISAAFK;QVYEEEYGSSLEDDVVGDTSGYYQR;SEIDLFNIR;SEIDLFNIRK;SELTGKFEK;SIPAYLAETLYYA…
-1.78054	-1.67207	-1.78779	-1.73996	-1.82345	-1.80415	0.00734647	0.104014	4	4	65.492	P08842	STS	Steryl-sulfatase	ANNWEGGIR;DLMPLLEGK;IDEPTSNMDIFPTVAK;LTVEAAQFIQR
2.98828	2.75478	2.94073	2.90524	2.86202	2.89818	0.066637	1.45016	15	15	32.854	P08865;A0A8I5KQE6	RPSA;RPSA2	Small ribosomal subunit protein uS2;Small ribosomal subunit protein uS2B	ADHQPLTEASYVNLPTIALCNTDSPLR;AIVAIENPADVSVISSR;DPEEIEKEEQAAAEK;EHPWEVMPDLYFYR;EHPWEVMPDLYFYRDPEEIEKEEQAAAEK;FAAATGATPIAGR;FLAAGTHLGGTNLDFQMEQYIYK;FTPGTFTNQIQAAFR;FTPGTFTNQIQAAFREPR;KSDGIYIINLK;LLVVTDPR;SDGIYIINLK;SGALDVLQMK;SGALDVLQMKEEDVLK;YVDIAIPCNNK
-5.76046	-5.77064	-5.92672	-5.88796	-5.71164	-5.91426	-0.021101	0.0927309	3	3	48.314	P08910	ABHD2	Monoacylglycerol lipase ABHD2	EYIPPLIWGK;KPQSLEDTDLSR;SPTAPPDLYFQDSGLSR
3.10032	2.82308	2.98393	2.94361	2.81662	2.97489	0.0992126	0.675847	4	4	25.636	P08962	CD63	CD63 antigen	AVEGGMK;DKVMSEFNNNFR;QQMENYPK;VMSEFNNNFR
0.439007	0.377878	0.346028	0.36282	0.386584	0.348818	0.0153135	0.188418	9	9	38.632	P09001	MRPL3	Large ribosomal subunit protein uL3m	ATSILEFYR;GFQGVMK;GQPATHGQTK;KATSILEFYR;LGMMPLWTK;MATLSVGGK;QLVSDEDKAQLASK;RPGAVATGDIGR;SGTWWDEHLSEENVPFIK
2.61678	2.25802	2.3989	2.35726	2.30426	2.34029	0.123755	0.68719	13	11	31.279	P09012	SNRPA	U1 small nuclear ribonucleoprotein A	AVPETRPNHTIYINNLNEK;AVQGGGATPVVGAVQGPVPGMPPMTQAPR;DALQGFK;EVSSATNALR;GQAFVIFK;HDIAFVEFDNEVQAGAAR;ITQNNAMK;KAVQGGGATPVVGAVQGPVPGMPPMTQAPR;LVPGRHDIAFVEFDNEVQAGAAR;SMQGFPFYDKPMR;SQETPATK;SQETPATKK;TDSDIIAK
0.454062	0.287539	0.365027	0.368612	0.335071	0.30859	0.0482661	0.54526	3	3	30.77	P09038	FGF2	Fibroblast growth factor 2	AILFLPMSAK;LESNNYNTYR;LQLQAEER
4.34036	4.06455	4.19177	4.17961	4.2433	4.26853	0.00486819	0.0276915	22	19	47.268	P09104	ENO2	Gamma-enolase	AAVPSGASTGIYEALELR;AAVPSGASTGIYEALELRDGDK;AAVPSGASTGIYEALELRDGDKQR;AVDHINSTIAPALISSGLSVVEQEK;DATNVGDEGGFAPNILENSEALELVK;DGKYDLDFK;DGKYDLDFKSPTDPSR;DYPVVSIEDPFDQDDWAAWSK;FAGHNFR;FTANVGIQIVGDDLTVTNPK;GNPTVEVDLYTAK;HIAQLAGNSDLILPVPAFNVINGGSHAGNK;IEEELGDEAR;IVIGMDVAASEFYR;LAMQEFMILPVGAESFR;LAQENGWGVMVSHR;LDNLMLELDGTENK;LGAEVYHTLK;SGETEDTFIADLVVGLCTGQIK;SPTDPSR;VNQIGSVTEAIQACK;YITGDQLGALYQDFVR
1.20358	1.05841	1.07232	1.00555	1.01399	1.0346	0.0857722	0.762926	12	12	44.292	P09110	ACAA1	3-ketoacyl-CoA thiolase, peroxisomal	AEELGLPILGVLR;DGSTTAGNSSQVSDGAAAILLAR;EKQDTFALASQQK;GGFKDTTPDELLSAVMTAVLK;GNPGNITSR;IAQFLSDIPETVPLSTVNR;KDGSTTAGNSSQVSDGAAAILLAR;QVITLLNELK;QVITLLNELKR;SITVTQDEGIRPSTTMEGLAK;SKAEELGLPILGVLR;SYAVVGVPPDIMGIGPAYAIPVALQK
-1.92111	-2.5827	-2.23372	-2.30575	-2.46793	-2.26609	0.21647	0.826522	3	3	16.156	P09132	SRP19	Signal recognition particle 19 kDa protein	SPADQDR;SVMLYAAEMIPK;TGGADQSLQQGEGSK
5.09753	4.7517	4.96511	4.87343	4.8407	4.96716	0.112915	0.889018	15	15	23.356	P09211	GSTP1	Glutathione S-transferase P	AFLASPEYVNLPINGNGK;AFLASPEYVNLPINGNGKQ;ALPGQLKPFETLLSQNQGGK;ASCLYGQLPK;DQQEAALVDMVNDGVEDLR;EEVVTVETWQEGSLK;FQDGDLTLYQSNTILR;MLLADQGQSWK;MLLADQGQSWKEEVVTVETWQEGSLK;MPPYTVVYFPVR;PPYTVVYFPVR;TLGLYGK;TLGLYGKDQQEAALVDMVNDGVEDLR;YISLIYTNYEAGK;YISLIYTNYEAGKDDYVK
0.195776	0.181892	0.0538092	0.0160332	0.162511	0.0607929	0.023763	0.138768	3	3	17.394	P09234	SNRPC	U1 small nuclear ribonucleoprotein C	ENVKDYYQK;TTAAFQQGK;WMEEQAQSLIDK
3.99733	3.31376	3.93894	3.39569	3.74583	3.7792	0.281111	0.996142	10	10	14.716	P09382	LGALS1	Galectin-1	ACGLVASNLNLKPGECLR;DGGAWGTEQR;DSNNLCLHFNPR;FNAHGDANTIVCNSK;GEVAPDAK;LNLEAINYMAADGDFK;LPDGYEFK;LPDGYEFKFPNR;SFVLNLGK;VRGEVAPDAK
2.27591	2.17763	2.18472	2.21801	2.18964	2.19654	0.013497	0.159882	9	9	25.789	P09417	QDPR	Dihydropteridine reductase	AAAAAAGEAR;AALDGTPGMIGYGMAK;EGGLLTLAGAK;MTDSFTEQADQVTAEVGK;NRPSSGSLIQVVTTEGR;NSGMPPGAAAIAVLPVTLDTPMNR;QSIWTSTISSHLATK;TELTPAYF;VLVYGGR
4.52269	4.17572	4.37303	4.22262	4.24353	4.31169	0.156359	1.21968	16	12	24.893	P09429;B2RPK0	HMGB1;HMGB1P1	High mobility group protein B1;Putative high mobility group protein B1-like 1	FKDPNAPK;GEHPGLSIGDVAK;GKFEDMAK;GKPDAAK;HPDASVNFSEFSK;IKGEHPGLSIGDVAK;KFKDPNAPK;KHPDASVNFSEFSK;KHPDASVNFSEFSKK;KKHPDASVNFSEFSK;KLGEMWNNTAADDK;KLGEMWNNTAADDKQPYEK;LGEMWNNTAADDK;LGEMWNNTAADDKQPYEK;TYIPPKGETK;YEKDIAAYR
4.59639	4.17424	4.43043	4.35085	4.23086	4.40569	0.159256	0.999477	16	16	15.85	P09455	RBP1	Retinol-binding protein 1	ALDVNVALR;ALDVNVALRK;EFEEDLTGIDDR;EFEEDLTGIDDRK;EIVQDGDHMIIR;GWTQWIEGDELHLEMR;IANLLKPDK;IANLLKPDKEIVQDGDHMIIR;KIANLLKPDK;KIANLLKPDKEIVQDGDHMIIR;MLVNENFEEYLR;MPVDFTGYWK;NYIMDFQVGK;NYIMDFQVGKEFEEDLTGIDDRK;PVDFTGYWK;VEGVVCK
-4.4984	-4.27178	-4.44066	-4.16268	-4.24821	-4.39405	-0.204297	1.37002	3	1	36.842	P09467	FBP1	Fructose-1,6-bisphosphatase 1	AISSAVR;APVILGSPDDVLEFLK;YVGSMVADVHR
2.50919	2.29493	2.41942	2.40613	2.30379	2.45382	0.0634263	0.527692	12	10	40.05	P09471	GNAO1	Guanine nucleotide-binding protein G(o) subunit alpha	AMDTLGIEYGDKER;EDGISAAK;EYQLNDSAK;IGAADYQPTEQDILR;IIHEDGFSGEDVK;LFDVGGQR;LLLLGAGESGK;MEDTEPFSAELLSAMMR;NLKEDGISAAK;QYKPVVYSNTIQSLAAIVR;TTGIVETHFTFK;YYLDSLDR
-0.151752	-0.265049	-0.247071	-0.221498	-0.191913	-0.288752	0.0152308	0.126196	7	7	34.632	P09486	SPARC	SPARC	DEDNNLLTEK;IHENEKR;KIHENEK;LEAGDHPVELLAR;NVLVTLYERDEDNNLLTEK;RLEAGDHPVELLAR;YIPPCLDSELTEFPLR
2.66393	2.26849	2.40257	2.27152	2.44516	2.44367	0.0988216	0.392676	16	3	25.712	P09488	GSTM1	Glutathione S-transferase Mu 1	FLPRPVFSK;GLAHAIR;ITQSNAILCYIAR;KHNLCGETEEEK;KYTMGDAPDYDR;LGLDFPNLPYLIDGAHK;LLLEYTDSSYEEK;LLLEYTDSSYEEKK;LYSEFLGK;MAVWGNK;PMILGYWDIR;RPWFAGNK;SQWLNEK;YLEELPEK;YLEELPEKLK;YTMGDAPDYDR
5.14926	4.73768	4.99597	4.95449	4.94515	5.01459	0.0808487	0.689886	46	18	32.708	P09493	TPM1	Tropomyosin alpha-1 chain	AADESER;AELSEGK;AEQAEADK;AEQAEADKK;AISEELDHALNDMTSI;AQKDEEK;AQKDEEKMEIQEIQLK;ATDAEADVASLNR;ATDAEADVASLNRR;DAQEKLELAEK;EDRYEEEIK;EDRYEEEIKVLSDK;ENALDRAEQAEADKK;GTEDELDK;GTEDELDKYSEALK;GTEDELDKYSEALKDAQEK;HIAEDADR;HIAEDADRK;IQLVEEELDR;IQLVEEELDRAQER;KATDAEADVASLNR;KATDAEADVASLNRR;KLVIIESDLER;KLVIIESDLERAEER;KYEEVAR;LATALQK;LATALQKLEEAEK;LATALQKLEEAEKAADESER;LDKENALDR;LDKENALDRAEQAEADK;LEEAEKAADESER…
2.72351	1.89396	2.62688	2.24632	2.27974	2.32114	0.33389	2.08256	9	9	27.076	P09496	CLTA	Clathrin light chain A	AIKELEEWYAR;ELEEWYAR;KQEAEWK;LEALDANSR;LQSEPESIR;LQSEPESIRK;QDEQLQK;SVLISLK;WREEQMER
3.05639	2.33532	2.82585	2.65841	2.54321	2.5968	0.285011	1.41896	10	10	25.19	P09497	CLTB	Clathrin light chain B	DLEEWNQR;EETPGTEWEK;ESKEETPGTEWEK;LQELDAASK;LTQEPESIR;LTQEPESIRK;QSEQVEK;RLQELDAASK;SVLMSLK;VTEQEWR
3.74705	3.42143	3.59708	3.5223	3.46169	3.55071	0.132705	1.08016	25	25	35.882	P09525	ANXA4	Annexin A4	AASGFNAMEDAQTLR;AASGFNAMEDAQTLRK;AEIDMLDIR;DEGNYLDDALVR;DIEQSIK;GAGTDEGCLIEILASR;GDTSGDYR;GDTSGDYRK;GLGTDDNTLIR;GLGTDEDAIISVLAYR;ISQTYQQQYGR;KWGTDEVK;NHLLHVFDEYK;NHLLHVFDEYKR;QDAQDLYEAGEK;QDAQDLYEAGEKK;SAYFAEK;SDTSFMFQR;SETSGSFEDALLAIVK;SLEDDIR;SLYSFIK;TPEEIRR;VLVSLSAGGR;VLVSLSAGGRDEGNYLDDALVR;WGTDEVK
3.72181	3.63182	3.67492	3.6647	3.63899	3.70287	0.0207888	0.351501	26	25	47.578	P09543;Q86UW6;Q92802;Q5TBK1	CNP	2,3-cyclic-nucleotide 3-phosphodiesterase	AGQVFLEELGNHK;AIFTGYYGK;APGAEEYAQQDVLK;APGAEEYAQQDVLKK;EKMDLVTYFGK;EKNQWQLSADDLKK;GAFSEEYK;GAFSEEYKR;GEEVGELSR;GGSRGEEVGELSR;GKPVPTQGSR;GLPGSGK;ILVLDDTNHER;ILVLDDTNHERER;KAGQVFLEELGNHK;LEQLFEMADQYQYQVVLVEPK;LSPTDNLPR;MDLVTYFGK;MVSADAYK;NQWQLSADDLK;NQWQLSADDLKK;QFVPGDEPR;VELSEQQLQLWPSDVDK;VELSEQQLQLWPSDVDKLSPTDNLPR;VIVDKYR;WMLTLAK
0.509769	0.271168	0.353156	0.281311	0.377475	0.394882	0.0520795	0.336436	14	13	32.818	P09601	HMOX1	Heme oxygenase 1;Heme oxygenase 1 soluble form	AALEQDLAFWYGPR;ALDLPSSGEGLAFFTFPNIASATK;ESPVFAPVYFPEELHR;EVHTQAENAEFMR;GKPPLNTR;KAALEQDLAFWYGPR;MNSLEMTPAVR;NKESPVFAPVYFPEELHR;TEPELLVAHAYTR;VQDSAPVETPR;WQEVIPYTPAMQR;YLGDLSGGQVLK;YLGDLSGGQVLKK
2.10956	1.90948	1.90713	1.91739	1.92457	1.92445	0.0656198	0.456459	21	20	123.97	P09619	PDGFRB	Platelet-derived growth factor receptor beta	AEAEDSFL;DSNYISK;EVDSDAYYVYR;GFSGIFEDR;GSTFLPLK;KGDVALPVPYDHQR;LLGEGYK;LLGEVGTLQFAELHR;LPGFHGLR;LQHVDRPLSVR;LVEPVTDFLLDMPYHIR;MAQPAHASDEIYEIMQK;QALMSELK;SDHPAILR;TTIGDREVDSDAYYVYR;VLELSESHPDSGEQTVR;VTDPQLVVTLHEK;YADIESSNYMAPYDNYVPSAPER;YGDLVDYLHR;YQQVDEEFLR;YVSELTLVR
3.44803	3.25661	3.35211	3.29849	3.28395	3.35016	0.0789108	1.03747	17	17	54.177	P09622	DLD	Dihydrolipoyl dehydrogenase, mitochondrial	AAQLGFK;ADGGTQVIDTK;ALLNNSHYYHMAHGK;ALTGGIAHLFK;EANLAASFGK;FPFAANSR;GIEMSEVR;GRIPVNTR;IDVSIEAASGGK;IPNIYAIGDVVAGPMLAHK;NLGLEELGIELDPR;NQVTATK;SDGKIDVSIEAASGGK;SEEQLKEEGIEYK;TNADTDGMVK;VGKFPFAANSR;VVHVNGYGK
4.47197	4.47856	4.46749	4.45348	4.54459	4.46923	-0.0339241	0.462633	20	18	38.746	P09651;A0A2R8Y4L2;Q32P51	HNRNPA1;HNRNPA1L3;HNRNPA1L2	Heterogeneous nuclear ribonucleoprotein A1;Heterogeneous nuclear ribonucleoprotein A1, N-terminally processed;Heterogeneous nuclear ribonucleoprotein A1-like 3;Heterogeneous nuclear ribonucleoprotein A1-like 2	DYFEQYGK;EDSQRPGAHLTVK;EDTEEHHLR;EDTEEHHLRDYFEQYGK;EPEQLRK;GFAFVTFDDHDSVDK;GFAFVTFDDHDSVDKIVIQK;GFGFVTYATVEEVDAAMNARPHK;GGGFGGNDNFGR;IEVIEIMTDR;IFVGGIKEDTEEHHLRDYFEQYGK;KLFIGGLSFETTDESLR;LFIGGLSFETTDESLR;NQGGYGGSSSSSSYGSGR;RGFAFVTFDDHDSVDK;SESPKEPEQLR;SESPKEPEQLRK;SHFEQWGTLTDCVVMR;SSGPYGGGGQYFAKPR;YHTVNGHNCEVR
1.38602	0.883398	1.1811	1.00826	1.00716	1.13742	0.2093	1.27673	14	14	28.415	P09661	SNRPA1	U2 small nuclear ribonucleoprotein A	DRELDLR;GGPSPGDVEAIK;GLLQSGQIPGR;GYKIPVIENLGATLDQFDAIDFSDNEIR;IPVIENLGATLDQFDAIDFSDNEIRK;KGGPSPGDVEAIK;KLDGFPLLR;LTAELIEQAAQYTNAVR;NAIANASTLAEVER;RGAQLAK;SLTYLSILR;TFNPGAGLPTDK;TFNPGAGLPTDKK;TLLVNNNR
2.65321	2.88769	2.70365	2.8192	2.80002	2.77229	-0.108877	2.09292	7	7	37.393	P09668	CTSH	Pro-cathepsin H;Cathepsin H mini chain;Cathepsin H;Cathepsin H heavy chain;Cathepsin H light chain	GIMGEDTYPYQGK;GNFVSPVK;KGNFVSPVK;NGIPYWIVK;TGIYSSTSCHK;TPDKVNHAVLAVGYGEK;VNHAVLAVGYGEK
1.85854	1.68749	1.75071	1.67991	1.7843	1.78574	0.0254714	0.174907	8	8	8.7813	P09669	COX6C	Cytochrome c oxidase subunit 6C	AGIFQSVK;APEVLPKPR;AYADFYR;KAGIFQSVK;KAYADFYR;MAPEVLPKPR;NYDVMKDFEEMR;NYDVMKDFEEMRK
1.37093	1.21114	1.31105	1.23878	1.25378	1.32726	0.0489699	0.584364	13	13	76.684	P09871;P48740	C1S	Complement C1s subcomponent;Complement C1s subcomponent heavy chain;Complement C1s subcomponent light chain	EDTPNSVWEPAK;GDSGGAFAVQDPNDK;GDSGGAFAVQDPNDKTK;IIGGSDADIK;LLEVPEGR;LPVAPLRK;MLTPEHVFIHPGWK;NYVDWIMK;SDFSNEER;SNALDIIFQTDLTGQK;SSNNPHSPIVEEFQVPYNK;TNFDNDIALVR;VEDPESTLFGSVIR
4.24917	4.04662	4.14998	4.05107	4.09508	4.15235	0.0820688	0.851729	54	54	113.08	P09874	PARP1	Poly [ADP-ribose] polymerase 1;Poly [ADP-ribose] polymerase 1, processed C-terminus;Poly [ADP-ribose] polymerase 1, processed N-terminus	AEPVEVVAPR;AMVEYEIDLQK;AQNDLIWNIK;AQNDLIWNIKDELK;AQNDLIWNIKDELKK;EDAIEHFMK;EELGFRPEYSASQLK;ELLIFNK;FYPLEIDYGQDEEAVK;FYPLEIDYGQDEEAVKK;FYTLIPHDFGMK;GDEVDGVDEVAK;GFSLLATEDK;GFSLLATEDKEALKK;GGAAVDPDSGLEHSAHVLEK;GGSDDSSKDPIDVNYEK;GIYFADMVSK;GQDGIGSK;GQVKEEGINK;GTNSYYK;HASHISK;HPDVEVDGFSELR;IAPPEAPVTGYMFGK;KFYPLEIDYGQDEEAVK;KFYPLEIDYGQDEEAVKK;KGDEVDGVDEVAK;KLTVNPGTK;KPPLLNNADSVQAK;KTAEAGGVTGK;LEQMPSK;…
0.394358	0.325089	0.374545	0.478777	0.572694	0.339739	-0.0274232	0.116721	15	14	55.36	P09914;Q5T764	IFIT1	Interferon-induced protein with tetratricopeptide repeats 1	ALDLESLSLLGFVYK;AQMIQIK;EAENLMQEEHDNQANVR;GQNEEALK;IEQASLTR;KAEENFQK;KLSNPFR;KPTFEVAHLDLAR;KSDVNAIIHYLK;LAADFENSVR;LEGNMNEALEYYER;SAIFHFESAVEK;SDVNAIIHYLK;VLDQIEFLDTK;VLEVDPENPESSAGYAISAYR
0.157667	0.0183163	0.0569048	0.0784435	0.0980921	0.110126	-0.0140985	0.129497	16	16	77.982	P09917	ALOX5	Polyunsaturated fatty acid 5-lipoxygenase	AMENLFINR;ANATGGGGHVQMVQR;DDGLLVWEAIR;DDQIHILK;DIQFDSEK;GAVDSYDVTVDEELGEIQLVR;GMESKEDIPYYFYR;GVDFVLNYSK;GVVTIEQIVDTLPDR;HLLDKPFYNDFER;IPNSVAI;IVPIAIQLNQIPGDENPIFLPSDAK;LLVAHVR;NLEAIVSVIAER;QLPYYYLSPDR;QLPYYYLSPDRIPNSVAI
2.91941	2.37342	2.8081	2.4634	2.58933	2.6438	0.290583	2.00729	11	11	24.824	P09936	UCHL1	Ubiquitin carboxyl-terminal hydrolase isozyme L1	EFTEREQGEVR;GQEVSPK;LGFEDGSVLK;LGVAGQWR;MPFPVNHGASSEDTLLK;MPFPVNHGASSEDTLLKDAAK;MQLKPMEINPEMLNK;NEAIQAAHDAVAQEGQCR;QFLSETEK;QIEELKGQEVSPK;VDDKVNFHFILFNNVDGHLYELDGR
4.39761	4.14034	4.24613	4.23213	4.16428	4.25582	0.0784505	0.60861	32	32	69.284	P09960	LTA4H	Leukotriene A-4 hydrolase	APLPLGHIK;ASMHPVTAMLVGK;DFLYSYFK;DGETPDPEDPSR;DGETPDPEDPSRK;DLAAFDK;DLSSHQLNEFLAQTLQR;EDDLNSFNATDLK;EDDLNSFNATDLKDLSSHQLNEFLAQTLQR;ELVALMSAIR;ELVALMSAIRDGETPDPEDPSR;ELVALMSAIRDGETPDPEDPSRK;GSPMEISLPIALSK;HFNALGGWGELQNSVK;LTYTAEVSVPK;LVVDLTDIDPDVAYSSVPYEK;MATEQGR;MQEVYNFNAINNSEIR;SAYEFSETESMLK;SHDQAVR;SITTDDWK;SLSNVIAHEISHSWTGNLVTNK;SLVLDTK;SSALQWLTPEQTSGK;TFGETHPFTK;TLTGTAALTVQSQEDNLR;TLVWSEK;TLV…
3.35205	3.2198	3.30455	3.24326	3.32339	3.32523	0.00941404	0.0900477	26	21	39.455	P09972	ALDOC	Fructose-bisphosphate aldolase C	AEVNGLAAQGK;ALQASALNAWR;DDNGVPFVR;DGADFAK;DNAGAATEEFIK;DNAGAATEEFIKR;ELSDIALR;GILAADESVGSMAK;GIVVGIK;GVVPLAGTDGETTTQGLDGLSER;KDGADFAK;LSQIGVENTEENR;LSQIGVENTEENRR;PHSYPALSAEQK;QVLFSADDR;QVLFSADDRVK;RAEVNGLAAQGK;RLSQIGVENTEENRR;TPSALAILENANVLAR;TVPPAVPGVTFLSGGQSEEEASFNLNAINR;VDKGVVPLAGTDGETTTQGLDGLSER;VLAAVYK;YASICQQNGIVPIVEPEILPDGDHDLKR;YEGSGEDGGAAAQSLYIANHAY;YTPEEIAMATVTALR;YTPEEIAMATVTALRR
-0.382236	-1.01389	-0.540957	-0.850491	-0.854569	-0.702126	0.297248	1.67505	50	2	192.78	P0C0L4	C4A	Complement C4-A;Complement C4 beta chain;Complement C4-A alpha chain;C4a anaphylatoxin;C4b-A;C4d-A;Complement C4 gamma chain	AAANQMR;ADGSYAAWLSR;AEFQDALEK;AEMADQASAWLTR;ALEILQEEDLIDEDDIPVR;ANSFLGEK;ASAGLLGAHAAAITAYALTLTK;DDPDAPLQPVTPLQLFEGR;DFALLSLQVPLK;DFALLSLQVPLKDAK;DHAVDLIQK;DSSTWLTAFVLK;EELVYELNPLDHR;EFHLHLR;EGAIHREELVYELNPLDHR;EMSGSPASGIPVK;EVYMPSSIFQDDFVIPDISEPGTWK;FGLLDEDGKK;GHLFLQTDQPIYNPGQR;GLEEELQFSLGSK;GLESQTK;GLQDEDGYR;GPEVQLVAHSPWLK;GSFEFPVGDAVSK;ITPGKPYILTVPGHLDEMQLDIQAR;ITQVLHFTK;KADGSYAAWLSR;KYVLPNFEVK…
3.68769	3.5333	3.60355	3.57684	3.56562	3.61432	0.0396283	0.494211	52	5	192.75	P0C0L5	C4B	Complement C4-B;Complement C4 beta chain;Complement C4-B alpha chain;C4a anaphylatoxin;C4b-B;C4d-B;Complement C4 gamma chain	AAANQMR;ADGSYAAWLSR;AEFQDALEK;AEMADQAAAWLTR;ALEILQEEDLIDEDDIPVR;ASAGLLGAHAAAITAYALTLTK;ASSFLGEK;DDPDAPLQPVTPLQLFEGR;DFALLSLQVPLK;DFALLSLQVPLKDAK;DHAVDLIQK;EELVYELNPLDHR;EFHLHLR;EGAIHREELVYELNPLDHR;EMSGSPASGIPVK;EVYMPSSIFQDDFVIPDISEPGTWK;FGLLDEDGKK;GHLFLQTDQPIYNPGQR;GLEEELQFSLGSK;GLESQTK;GLQDEDGYR;GPEVQLVAHSPWLK;GSFEFPVGDAVSK;GSSTWLTAFVLK;GVAHNNLMAMAQETGDNLYWGSVTGSQSNAVSPTPAPR;ITPGKPYILTVPGHLDEMQL…
1.28633	1.51568	1.38099	1.46178	1.50741	1.35352	-0.128813	1.05448	5	3	13.509	Q71UI9;P0C0S5	H2AZ2;H2AZ1	Histone H2A.V;Histone H2A.Z	AGLQFPVGR;ATIAGGGVIPHIHK;GDEELDSLIK;HLQLAIR;HLQLAIRGDEELDSLIK
3.49529	3.38258	3.38029	3.25283	3.71159	3.41578	-0.102062	0.253779	8	0	14.095	Q6FI13;P0C0S8;Q99878;Q96KK5;Q9BTM1;Q16777	H2AC18;H2AC11;H2AC14;H2AC12;H2AJ;H2AC20	Histone H2A type 2-A;Histone H2A type 1;Histone H2A type 1-J;Histone H2A type 1-H;Histone H2A.J;Histone H2A type 2-C	AGLQFPVGR;HLQLAIR;HLQLAIRNDEELNK;KGNYAER;KTESHHK;NDEELNK;NDEELNKLLGK;VTIAQGGVLPNIQAVLLPK
-2.68789	-1.74043	-2.49781	-2.23875	-2.17881	-2.43197	-0.247283	1.02876	1	1	58.256	P0C6C1	ANKRD34C	Ankyrin repeat domain-containing protein 34C	GTLPVDQEK
-0.922377	-1.20312	-1.08331	-1.11455	-1.1791	-1.04471	0.100688	0.755836	2	2	14.215	P0C7P0	CISD3	CDGSH iron-sulfur domain-containing protein 3, mitochondrial	TPIKVELVAGK;VELVAGK
-5.32774	-6.06179	-5.67862	-5.85845	-5.75781	-5.8042	0.222306	0.768934	1	1	73.305	P0C7T5	ATXN1L	Ataxin-1-like	GAIIQLATGELK
-3.70024	-3.67997	-3.83978	-3.84315	-3.68373	-3.83601	-0.0133851	0.0640364	3	3	90.476	P0C7U0;Q5R3F8	ELFN1	Protein ELFN1	DEDLHDILDYWK;IPYLPAAGEVEQYK;YGPELEAPGLAPLSQGPLLGPEAVTR
-1.45068	-1.57186	-1.5565	-1.5953	-1.56579	-1.52532	0.0377693	0.375922	6	6	35.932	P0C870	JMJD7	Bifunctional peptidase and (3S)-lysyl hydroxylase JMJD7	AEAALEAVR;AQHPGVLYVQK;ATVGSTEVSVAVTPDGYADAVR;NALQHWPALQK;VPWIPLDPLAPDLAR;VVDEEAMEK
-3.9237	-3.70965	-3.621	-3.74493	-3.6289	-3.59158	-0.0549952	0.17899	2	2	41.739	P0CAP2	POLR2M	DNA-directed RNA polymerase II subunit GRINL1A	DKQHLDDITAAR;GFEPQAPEDLAQR
-1.46913	-1.92727	-1.99352	-2.20895	-2.02804	-1.85339	0.264061	0.640041	7	6	27.507	P0CG30;P0CG29	GSTT2B;GSTT2	Glutathione S-transferase theta-2B;Glutathione S-transferase theta-2	AVYIFAK;GLELFLDLVSQPSR;KTLPTPSPEAYQAMLLR;SKEFLQINSLGK;TAMDQALQWLEDK;TLPTPSPEAYQAMLLR;YQTPDHWYPSDLQAR
-1.27516	-1.16778	-1.01827	-0.847893	-1.0371	-1.17185	-0.184386	0.626753	2	2	5.2288	P0CG34;P0CG35;P0DX04	TMSB15A;TMSB15B;TMSB15C	Thymosin beta-15A;Thymosin beta-15B;Thymosin beta-15C	SDKPDLSEVEK;SDKPDLSEVEKFDR
-4.90023	-4.04645	-4.64258	-3.91393	-4.37157	-4.4519	-0.451782	1.07458	10	1	121.28	P0CG38;P0CG39;Q6S5H5;Q6S545;A6NI47;Q6S8J7	POTEI;POTEJ	POTE ankyrin domain family member I;POTE ankyrin domain family member J	AGFAGDDAPR;ANLNALDR;AVFPSIVGRPR;CQLNVLDNKK;IWHHTFYNELR;LCYVALDFEQEMAMAASSSSLEK;QEYDESGPSIVHR;QEYDESGPSIVHRK;RGILTLK;VAPEEHPILLTEAPLNPK
-3.06543	-3.01114	-3.06954	-2.99277	-3.08451	-3.18888	-0.0852757	0.285103	2	2	16.445	P0DI81;P0DI82	TRAPPC2;TRAPPC2B	Trafficking protein particle complex subunit 2;Trafficking protein particle complex subunit 2B	FIMLHDIR;FSMNPFYEPNSPIR
-1.96716	-2.47587	-2.17458	-2.38062	-2.39826	-2.32801	0.223606	1.07387	2	2	9.1135	P0DJ07	PET100	Protein PET100 homolog, mitochondrial	ELWPPEK;LQEIEEFKER
0.156404	0.179972	0.147788	0.0986137	0.223641	0.105368	0.00970713	0.0845486	15	7	34.196	P0DMM9;P0DMN0	SULT1A3;SULT1A4	Sulfotransferase 1A3;Sulfotransferase 1A4	AHPEPGTWDSFLEK;DVAVSYYHFHR;FDADYAEK;GMAGDWK;ILEFVGR;KGMAGDWK;MELIQDTSRPPLEYVK;SHLPLALLPQTLLDQK;SLPEETMDFMVQHTSFK;THPVLYLFYEDMK;THPVLYLFYEDMKENPK;TTFTVAQNER;VPFLEVNDPGEPSGLETLK;VPFLEVNDPGEPSGLETLKDTPPPR;YFAEALGPLQSFQARPDDLLINTYPK
4.6317	4.32688	4.51495	4.41455	4.4212	4.48802	0.104311	0.986571	33	14	70.051	P0DMV8;P0DMV9	HSPA1A;HSPA1B	Heat shock 70 kDa protein 1A;Heat shock 70 kDa protein 1B	AEDEVQR;AFYPEEISSMVLTK;AQIHDLVLVGGSTR;ATAGDTHLGGEDFDNR;DAGVIAGLNVLR;DNNLLGR;EIAEAYLGYPVTNAVITVPAYFNDSQR;ELEQVCNPIISGLYQGAGGPGPGGFGAQGPK;FGDPVVQSDMK;GGSGSGPTIEEVD;HWPFQVINDGDKPK;IINEPTAAAIAYGLDR;ITITNDK;ITITNDKGR;KDISQNK;KFGDPVVQSDMK;LDKAQIHDLVLVGGSTR;LIGDAAK;LLQDFFNGR;LSKEEIER;LVNHFVEEFK;LVNHFVEEFKR;MVQEAEK;NALESYAFNMK;NQVALNPQNTVFDAK;NSTIPTK;QTQIFTTYSDNQPGVLIQVYEGER;SAVEDEGLK;SINPDEAVAYGAAVQAAIL…
3.69881	2.35838	3.51295	3.07363	2.73987	3.02771	0.566578	1.71687	12	12	16.837	P0DP25;P0DP24;P0DP23;P27482;P02585	CALM3;CALM2;CALM1	Calmodulin-3;Calmodulin-2;Calmodulin-1	ADQLTEEQIAEFK;DGDGTITTK;DTDSEEEIR;DTDSEEEIREAFR;EADIDGDGQVNYEEFVQMMTAK;EAFSLFDK;EAFSLFDKDGDGTITTK;ELGTVMR;KMKDTDSEEEIR;MKDTDSEEEIR;MKDTDSEEEIREAFR;VFDKDGNGYISAAELR
-1.60325	-1.38885	-1.68703	-1.44516	-1.41021	-1.53256	-0.16641	1.63292	1	1	15.237	P0DPB6	POLR1D	DNA-directed RNA polymerases I and III subunit RPAC2	GTLPAVEPFQR
-2.74666	-2.70369	-2.7768	-2.84177	-2.62474	-2.80295	-0.0528542	0.254432	4	4	43.813	P0DTL6	ZFTRAF1	Zinc finger TRAF-type-containing protein 1	AAEAAEAAAAAAAAGSGK;FTVLNQTWVLK;IGYTEVQFRPYR;LFLFQIQK
0.723135	0.26177	0.519252	0.294329	0.312577	0.419958	0.245408	1.45635	5	5	19.393	P10109	FDX1	Adrenodoxin, mitochondrial	DGETLTTK;ITVHFINR;SMDNMTVR;SSSEDKITVHFINR;VPETVADAR
-2.75662	-2.9126	-2.78565	-2.83236	-2.87487	-2.75533	0.0359802	0.394662	10	5	20.615	P10114	RAP2A	Ras-related protein Rap-2a	EIEVDSSPSVLEILDTAGTEQFASMR;EVSSSEGR;KEIEVDSSPSVLEILDTAGTEQFASMR;TMVDELFAEIVR;VDLESEREVSSSEGR;VPVILVGNK;VPVILVGNKVDLESER;VVVLGSGGVGK;YDPTIEDFYR;YDPTIEDFYRK
3.22835	3.13328	3.16413	3.14528	3.14065	3.16819	0.0350602	0.70703	25	25	60.67	P10155	RO60	RNA-binding protein RO60	AIADWYNEK;ALDAAFYK;ALLQEMPLTALLR;ALSVETEK;DELEVIHLIEEHR;EHLLTNHLK;EVHELYK;FLCFGSEGGTYYIK;GCEVIQEIK;GGMALALAVTK;GWKEVHELYK;IPTHLFTFIQFK;KAIADWYNEK;KMDIPAK;LGLENAEALIR;LSHLKPSSEGLAIVTK;MEESVNQMQPLNEK;NFTLDMI;QIANSQDGYVWQVTDMNR;SFSQEGR;TNTPADVFIVFTDNETFAGGVHPAIALR;TRDELEVIHLIEEHR;TVEPTGK;WRPDEEILK;YLEAVEK
3.27913	3.13611	3.19945	3.17399	3.16835	3.21698	0.0380236	0.534188	28	28	105.32	P10253	GAA	Lysosomal alpha-glucosidase;76 kDa lysosomal alpha-glucosidase;70 kDa lysosomal alpha-glucosidase	AGYIIPLQGPGLTTTESR;AHFPLDVQWNDLDYMDSR;AHFPLDVQWNDLDYMDSRR;APSPLYSVEFSEEPFGVIVR;DFPAMVQELHQGGR;DFTFNKDGFR;DGFRDFPAMVQELHQGGR;DSSTWTVDHQLLWGEALLITPVLQAGK;EPAIHSEGQWVTLPAPLDTINVHLR;GAYTQVIFLAR;GELFWDDGESLEVLER;GTRPFVISR;LDVMMETENR;LHFTIKDPANR;NHNSLLSLPQEPYSFSEPAQQAMR;QQPMALAVALTK;RDFTFNK;RDFTFNKDGFR;RYEVPLETPHVHSR;STFAGHGR;STGGILDVYIFLGPEPK;TTPTFFPK;VTSEGAGLQLQK;WGYSSTAITR;WTQLGAFYPFMR;YEVPLETPHVHSR…
2.3461	2.01946	2.19746	2.12831	2.11144	2.20693	0.0936368	0.71727	11	9	23.48	P10301	RRAS	Ras-related protein R-Ras	ADLESQR;DRDDFPVVLVGNK;GGGPGPGDPPPSETHK;KYQEQELPPSPPSAPR;LDILDTAGQEEFGAMR;LFTQILR;LNVDEAFEQLVR;LVVVGGGGVGK;QSFNEVGK;SEASAFGASHHVAYFEASAK;VKDRDDFPVVLVGNK
0.64123	0.657196	0.586795	0.579401	0.699681	0.555559	-0.0091807	0.065676	10	6	40.648	P10321	HLA-C	HLA class I histocompatibility antigen, C alpha chain	APWVEQEGPEYWDR;APWVEQEGPEYWDRETQK;DGEDQTQDTELVETRPAGDGTFQK;FDSDAASPR;FISVGYVDDTQFVR;GYDQSAYDGK;GYDQSAYDGKDYIALNEDLR;SWTAADTAAQITQR;WAAVVVPSGQEQR;YFDTAVSRPGR
-0.00746155	-1.35656	-0.85587	-1.14181	-1.56291	-1.14563	0.565041	0.633175	9	4	67.585	P10398	ARAF	Serine/threonine-protein kinase A-Raf	FLFHGFR;GSPSPASVSSGR;GYLSPDLSK;IGDFGLATVK;QTAQGMDYLHAK;SNNIFLHEGLTVK;VSQPTAEQAQAFK;WHGDVAVK;WSGAQPLEQPSGSVLWMAAEVIR
1.11953	0.706568	1.09735	0.965292	0.747489	1.01078	0.163385	0.846883	17	5	21.865	P10412	H1-4	Histone H1.4	AASGEAKPK;ALAAAGYDVEK;ALAAAGYDVEKNNSR;ASGPPVSELITK;ATGAATPK;GTGASGSFK;GTLVQTK;KAASGEAKPK;KALAAAGYDVEK;KASGPPVSELITK;KATGAATPK;KPAAAAGAK;KPAGAAK;KSAGAAK;SETAPAAPAAPAPAEK;SGVSLAALK;SGVSLAALKK
2.4415	2.24327	2.32719	2.28273	2.29324	2.34245	0.0650813	0.746977	15	15	68.996	P10515	DLAT	Dihydrolipoyllysine-residue acetyltransferase component of pyruvate dehydrogenase complex, mitochondrial	DIDSFVPSK;GIDLTQVK;GVETIANDVVSLATK;ILVAEGTR;ILVPEGTR;ISVNDFIIK;KDIDSFVPSK;KYLEKPITMLL;LVPADNEK;VAPAPAAVVPPTGPGMAPVPTGVFTDIPISNIR;VFVSPLAK;VPEANSSWMDTVIR;VPLPSLSPTMQAGTIAR;VVDGAVGAQWLAEFR;YLEKPITMLL
-0.968271	-0.831154	-0.989196	-0.875257	-0.87885	-0.885798	-0.10756	3.19601	9	7	212.88	P10586	PTPRF	Receptor-type tyrosine-protein phosphatase F	AALEYLGSFDHYAT;AYIATQGPLAESTEDFWR;DHPPIPITDLADNIER;FSQEYESIDPGQQFTWENSNLEVNKPK;GVEGSDYINASFLDGYR;LVNIMPYELTR;TGEGFIDFIGQVHK;VILTSIDGVPGSDYINANYIDGYR;YANVIAYDHSR
-4.96818	-5.13478	-5.11752	-5.05594	-5.13634	-4.97712	-0.0241934	0.120035	3	3	46.155	P10589;P24468	NR2F1;NR2F2	COUP transcription factor 1;COUP transcription factor 2	IFQEQVEK;TVSSSVIEQLFFVR;VVAFMDHIR
1.79543	1.14724	1.6098	1.27135	1.47533	1.45509	0.265574	1.35357	7	7	11.737	P10599	TXN	Thioredoxin	EKLEATINELV;LEATINELV;MIKPFFHSLSEK;TAFQEALDAAGDK;VGEFSGANK;VGEFSGANKEK;VKQIESK
2.34722	1.97059	2.22158	2.02271	2.16808	2.1683	0.134296	0.926171	8	8	13.696	P10606	COX5B	Cytochrome c oxidase subunit 5B, mitochondrial	EDPNLVPSISNK;EDPNLVPSISNKR;EIMLAAK;GASGTREDPNLVPSISNK;GASGTREDPNLVPSISNKR;GLDPYNVLAPK;KGLDPYNVLAPK;LVPQQLAH
1.5798	1.29839	1.45839	1.37562	1.42293	1.39901	0.0771681	0.607682	6	6	54.465	P10619	CTSA	Lysosomal protective protein;Lysosomal protective protein 32 kDa chain;Lysosomal protective protein 20 kDa chain	EFSHIAFLTIK;GAGHMVPTDKPLAAFTMFSR;HLHYWFVESQK;QYSGYLK;SMNSQYLK;YGDSGEQIAGFVK
-0.181477	-0.357351	-0.256537	-0.308416	-0.322022	-0.282568	0.0716139	1.19649	5	5	17.598	P10620	MGST1	Microsomal glutathione S-transferase 1	IYHTIAYLTPLPQPNR;KVFANPEDCVAFGK;MMLMSTATAFYR;TDDRVER;VFANPEDCVAFGK
2.09386	1.77225	1.93105	1.84123	1.79295	1.91473	0.137549	1.00783	16	12	42.981	P10644	PRKAR1A	cAMP-dependent protein kinase type I-alpha regulatory subunit	AATVVAR;GAISAEVYTEEDAASYVR;HNIQALLK;ILMGSTLR;KMYEEFLSK;LGPSDYFGEIALLMNRPR;LTVADALEPVQFEDGQK;MESGSTAASEEAR;MYEEFLSK;NVLFSHLDDNER;QIQNLQK;RSENEEFVEVGR;SENEEFVEVGR;TMAALAK;VSILESLDK;VSILESLDKWER
-0.902878	-0.908121	-1.01587	-1.05157	-0.946172	-0.976124	0.0304267	0.268942	2	2	28.627	P10746	UROS	Uroporphyrinogen-III synthase	HIQELSGDNIDQIK;LSHPEDYGGLIFTSPR
2.40405	2.12248	2.26712	2.15793	2.17996	2.3042	0.112989	0.862799	11	11	31.462	P10768	ESD	S-formylglutathione hydrolase	AFSGYLGTDQSK;AYDATHLVK;FAVYLPPK;FAVYLPPKAETGK;KAFSGYLGTDQSK;KIPVVFR;LQEGYDHSYYFIATFITDHIR;MYSYVTEELPQLINANFPVDPQR;SGYHQSASEHGLVVIAPDTSPR;SYPGSQLDILIDQGK;VFEHDSVELNCK
5.31935	4.97685	5.18444	5.04444	5.08517	5.14567	0.129392	1.05412	48	48	61.054	P10809	HSPD1	60 kDa heat shock protein, mitochondrial	AAVEEGIVLGGGCALLR;ALMLQGVDLLADAVAVTMGPK;APGFGDNR;APGFGDNRK;CEFQDAYVLLSEK;CIPALDSLTPANEDQK;DDAMLLK;DGVTVAK;DMAIATGGAVFGEEGLTLNLEDVQPHDLGK;DRVTDALNATR;EEKDPGMGAMGGMGGGMGGGMF;EIGNIISDAMK;GANPVEIR;GANPVEIRR;GDKAQIEK;GIIDPTK;GIIDPTKVVR;GVMLAVDAVIAELK;GVMLAVDAVIAELKK;GYISPYFINTSK;IGIEIIK;IMQSSSEVGYDAMAGDFVNMVEK;IPAMTIAK;IQEIIEQLDVTTSEYEK;IQEIIEQLDVTTSEYEKEK;ISSIQSIVPALEIANAHR;KGVITVK;KISSIQSIVPALEIANAH…
2.25837	2.21864	2.19979	2.17234	2.21258	2.20728	0.0132828	0.180524	16	16	52.494	P10909	CLU	Clusterin;Clusterin beta chain;Clusterin alpha chain	ASSIIDELFQDR;EILSVDCSTNNPSQAK;ELDESLQVAER;EPQDTYHYLPFSLPHR;FMETVAEK;KTLLSNLEEAK;KTLLSNLEEAKK;KYNELLK;LFDSDPITVTVPVEVSR;QQTHMLDVMQDHFSR;RELDESLQVAER;RPHFFFPK;SGSGLVGR;TLLSNLEEAK;TLLSNLEEAKK;VTTVASHTSDSDVPSGVTEVVVK
6.61011	6.11771	6.43509	6.23662	6.26095	6.36993	0.185151	1.07419	52	50	72.332	P11021	HSPA5	Endoplasmic reticulum chaperone BiP	AKFEELNMDLFR;ALSSQHQAR;AVEEKIEWLESHQDADIEDFK;AVEEKIEWLESHQDADIEDFKAK;DAGTIAGLNVMR;DNHLLGTFDLTGIPPAPR;EFFNGKEPSR;ELEEIVQPIISK;ETAEAYLGK;FAEEDKK;FEELNMDLFR;IDTRNELESYAYSLK;IEIESFYEGEDFSETLTR;IEWLESHQDADIEDFK;IEWLESHQDADIEDFKAK;IINEPTAAAIAYGLDK;IINEPTAAAIAYGLDKR;ITITNDQNR;ITPSYVAFTPEGER;KELEEIVQPIISK;KKELEEIVQPIISK;KSDIDEIVLVGGSTR;KSQIFSTASDNQPTVTIK;KTKPYIQVDIGGGQTK;KVTHAVVTVPAYFNDAQR;LIGDAAK;LSSEDK…
1.18656	1.31087	1.19286	1.15708	1.23731	1.18974	-0.00838089	0.130453	21	21	177.6	P11047	LAMC1	Laminin subunit gamma-1	AFDITYVR;AHVENTER;DGFFGNPLAPNPADK;DTLQEANDILNNLK;EAEREVMDLLR;EAQDVKDVDQNLMDR;EAQQALGSAAADATEAK;GKTEQQTADQLLAR;HKQEADDIVR;KVSDLENEAK;LHEATDYPWRPALTPFEFQK;LKDYEDLREDMR;LNEIEGTLNK;LNTFGDEVFNDPK;LSAEDLVLEGAGLR;MEAENLEQLIDQK;NISQDLEK;QDIAVISDSYFPR;SYYYAISDFAVGGR;VSVPLIAQGNSYPSETTVK;YFIAPAK
2.45618	2.1704	2.27583	2.19741	2.18069	2.29348	0.117795	0.808886	12	12	48.344	P11117	ACP2	Lysosomal acid phosphatase	DPYQEEEWPQGFGQLTK;EGMLQHWELGQALR;FLFGIYQQAEK;FNPNISWQPIPVHTVPITEDR;FVTLLYR;HVADGEDHA;LKDFSFR;LPPWASPQTMQR;LQGGVLLAQIR;LTEPVVPK;QTPEYQNESSR;TYPKDPYQEEEWPQGFGQLTK
-2.80589	-3.34891	-2.88959	-3.13595	-3.06767	-2.92584	0.179634	1.23559	2	2	199.52	P11137	MAP2	Microtubule-associated protein 2	IVQVVTAEAVAVLK;LINQPLPDLK
6.34394	5.97001	6.20789	6.06944	6.07172	6.14583	0.145945	1.18561	51	34	70.897	P11142	HSPA8	Heat shock cognate 71 kDa protein	AEDEKQR;ATVEDEK;ATVEDEKLQGK;DAGTIAGLNVLR;DISENKR;DNNLLGK;EEFEHQQK;EEFEHQQKELEK;EIAEAYLGK;ENKITITNDK;FDDAVVQSDMK;FEELNADLFR;GPAVGIDLGTTYSCVGVFQHGK;GTLDPVEK;HWPFMVVNDAGRPK;IINEPTAAAIAYGLDK;IINEPTAAAIAYGLDKK;IINEPTAAAIAYGLDKKVGAER;ITITNDK;ITITNDKGR;KDISENK;KDISENKR;LDKSQIHDIVLVGGSTR;LIGDAAK;LLQDFFNGK;LLQDFFNGKELNK;LSKEDIER;LYQSAGGMPGGMPGGFPGGGAPPSGGASSGPTIEEVD;MKEIAEAYLGK;MVNHFIAEFK;MVNHFIAEFKR;MVQE…
3.83468	3.79973	3.81765	3.82439	3.80919	3.85625	-0.035827	0.435161	8	8	54.083	P11166	SLC2A1	Solute carrier family 2, facilitated glucose transporter member 1	GTADVTHDLQEMK;GTADVTHDLQEMKEESR;QGGASQSDK;QGGASQSDKTPEELFHPLGADSQV;SFEMLILGR;TFDEIASGFR;TPEELFHPLGADSQV;VTILELFR
-2.19406	-2.2563	-2.26857	-2.26871	-2.17293	-2.15705	-0.0458053	0.456008	2	2	53.924	P11169;Q8TDB8	SLC2A3;SLC2A14	Solute carrier family 2, facilitated glucose transporter member 3;Solute carrier family 2, facilitated glucose transporter member 14	AFEGQAHGADR;QVTVLELFR
2.01403	1.75625	1.8853	1.78212	1.80182	1.86446	0.110756	1.03709	22	19	97.016	P11171	EPB41	Protein 4.1	DVPIVHTETK;EQHPDMSVTK;FLALGSK;FYPPDPAQLTEDITR;GGISETR;GVPWNFTFNVK;IRPGEQEQYESTIGFK;IVITGDADIDHDQVLVQAIK;KEDEPPEQAEPEPTEAWK;KLSMYGVDLHK;LAPNQTK;LSMYGVDLHK;LSTHSPFR;LTSTDTIPK;QASALIDRPAPHFER;SLDGAAAVDSADR;SMTPAQADLEFLENAK;SMTPAQADLEFLENAKK;SPRPTSAPAITQGQVAEGGVLDASAK;TQTVTISDNANAVK;TWLDSAK;VVVHQETEIADE
1.75539	1.71119	1.71177	1.78101	1.68233	1.70419	0.00270589	0.0270837	25	25	52.221	P11172	UMPS	Uridine 5-monophosphate synthase;Orotate phosphoribosyltransferase;Orotidine 5-phosphate decarboxylase	AALGPLVTGLYDVQAFK;AAWEAYLSR;DKLQAHGIR;ELITLAK;ELSFGAR;FADIGNTVK;FGDFVLK;GIISAADR;GIISAADRLEAAEMYR;GIVSRPR;GLQEVGLPLHR;GSDIIIVGR;IASWADLVNAHVVPGSGVVK;KAAWEAYLSR;KFADIGNTVK;KVDAETVGR;LQAHGIR;MAEEHSEFVVGFISGSR;MLEILEQQK;QYEGGIFK;RGSDIIIVGR;SGLSSPIYIDLR;VDAETVGR;VTDAIVLLDR;VTDAIVLLDREQGGKDK
3.39392	2.93211	3.21272	3.04766	3.05872	3.1672	0.176855	1.12823	14	14	39.233	P11177	PDHB	Pyruvate dehydrogenase E1 component subunit beta, mitochondrial	DAINQGMDEELER;DAINQGMDEELERDEK;DFLIPIGK;DIIFAIK;DIIFAIKK;EGVECEVINMR;EVSGLLK;ILEDNSIPQVK;IMEGPAFNFLDAPAVR;TIRPMDMETIEASVMK;TYYMSGGLQPVPIVFR;VFLLGEEVAQYDGAYK;VTGADVPMPYAK;VVSPWNSEDAK
1.10232	0.887541	1.01895	0.900475	0.979154	1.00682	0.082407	0.892623	17	17	53.516	P11182	DBT	Lipoamide acyltransferase component of branched-chain alpha-keto acid dehydrogenase complex, mitochondrial	AQIMNVSWSADHR;ASHNIGIAMDTEQGLIVPNVK;DKTEPIK;DMTVPILVSKPPVFTGK;GQVVQFK;ILKEDILNYLEK;KTLATPAVR;LAMENNIK;LREELKPIAFAR;LSDIGEGIR;LSEVVGSGK;LSFMPFFLK;QTGAILPPSPK;SYLENPAFMLLDLK;TLATPAVR;VIDGATMSR;YSHPHHFLK
3.87915	3.75653	3.78806	3.76372	3.80011	3.80266	0.0215333	0.225863	53	40	96.695	P11216	PYGB	Glycogen phosphorylase, brain form	AAPGYHMAK;AKPLTDSEK;ARPEYMLPVHFYGR;AWEITKK;DFYELEPEK;DFYELEPEKFQNK;DIVNMLMHHDR;DYFFALAHTVR;EIWGVEPSDLQIPPPNIPR;EIWGVEPSDLQIPPPNIPRD;EYYDHLPELK;FSAFLEK;GLAGLGDVAEVR;GLAGLGDVAEVRK;HLDHVAALFPGDVDR;HLEIIYAINQR;HLHFTLVK;IGEEFLTDLSQLK;IGEEFLTDLSQLKK;IHSEIVK;ILVDVEK;ILVDVEKVDWDK;INPSSMFDVHVK;IVNGWQVEEADDWLR;KLLPLVSDEVFIR;LKQEYFVVAATLQDIIR;LLPLVSDEVFIR;LQDFNVGDYIEAVLDR;LVTSIGDVVNHDPVVGDR;NLAENISR;NNTVNTM…
4.22181	3.98065	4.12285	4.04112	4.03169	4.11049	0.0862433	0.885906	55	41	97.091	P11217	PYGM	Glycogen phosphorylase, muscle form	AAPGYHMAK;APNDFNLK;ARPEFTLPVHFYGHVEHTSQGAK;AWDVTVR;DFNVGGYIQAVLDR;DFYELEPHK;DIVNMLMHHDR;DYYFALAHTVR;EIWGVEPSR;FAAYLER;GLAGVENVTELK;GLAGVENVTELKK;GYNAQEYYDR;GYNAQEYYDRIPELR;HLHFTLVK;HLQIIYEINQR;IGEDFISDLDQLR;IGEDFISDLDQLRK;IHSEILK;ILVDLER;ISGGWQMEEADDWLR;KLLSFVDDEAFIR;LKQEYFVVAATLQDIIR;LLSFVDDEAFIR;LLSFVDDEAFIRDVAK;LVTAIGDVVNHDPAVGDR;LVTAIGDVVNHDPAVGDRLR;MSLVEEGAVK;MSRPLSDQEK;NIATSGK;NLAENISR;NNVV…
1.24775	0.877953	1.02182	0.856649	0.931174	1.06083	0.148732	0.710323	10	5	23.567	P11233	RALA	Ras-related protein Ral-A	AEQWNVNYVETSAK;ANVDKVFFDLMR;GQNSLALHK;QVSVEEAK;SALTLQFMYDEFVEDYEPTK;SDLEDKR;VFFDLMR;VIMVGSGGVGK;VKEDENVPFLLVGNK;VVLDGEEVQIDILDTAGQEDYAAIR
1.34491	1.04828	1.2337	1.11279	1.10122	1.22877	0.124867	1.07655	12	7	23.408	P11234	RALB	Ras-related protein Ral-B	AEEDKIPLLVVGNK;AEEWGVQYVETSAK;ANVDKVFFDLMR;GQSSLALHK;QVPVEEAR;SALTLQFMYDEFVEDYEPTK;SKAEEWGVQYVETSAK;SKGQSSLALHK;VFFDLMR;VIMVGSGGVGK;VKAEEDKIPLLVVGNK;VVLDGEEVQIDILDTAGQEDYAAIR
0.102316	0.0490913	-0.0494852	0.00921059	0.0484438	-0.0664501	0.00429344	0.0236459	15	14	142.82	P11274	BCR	Breakpoint cluster region protein	AAATTSQPVLTSQQIETIFFK;AFVDNYGVAMEMAEK;ASELDLEK;DALVSGALESTK;ELPEPLFTDEFYPNFAEGIALSDPVAK;GQVQLDPQALQDRDWQR;ISQNFLSSINEEITPR;RPGAAASGER;RPGAAASGERDDR;STLVLHDLLK;VDPVGFAEAWK;VGDLFQK;VNDKEVSDR;VPELYEIHK;VSGVATDIQALK
0.774677	0.453827	0.647462	0.573233	0.472045	0.630867	0.14227	1.11428	7	7	44.882	P11279	LAMP1	Lysosome-associated membrane glycoprotein 1	AFSVNIFK;ALQATVGNSYK;FFLQGIQLNTILPDAR;FFLQGIQLNTILPDARDPAFK;SHAGYQTI;TVESITDIR;VWVQAFK
3.8114	3.5595	3.70927	3.64276	3.63022	3.68767	0.0883617	1.06774	22	22	46.588	P11310	ACADM	Medium-chain specific acyl-CoA dehydrogenase, mitochondrial	AAWEVDSGR;AAWEVDSGRR;AFTGFIVEADTPGIQIGR;ALDEATK;ANWYFLLAR;EEIIPVAAEYDK;EFQATAR;EHIDKYK;EHIDKYKN;ELNMGQR;ENVLIGDGAGFK;EPGLGFSFEFTEQQK;GIVFEDVK;GIVFEDVKVPK;IYQIYEGTSQIQR;KELNMGQR;KGDEYIINGQK;NTYYASIAK;QREPGLGFSFEFTEQQK;TGEYPVPLIR;TRPVVAAGAVGLAQR;VAMGAFDK
3.40971	3.21268	3.24239	3.21884	3.20809	3.24005	0.0768115	0.614977	31	31	90.725	P11387;Q969P6	TOP1	DNA topoisomerase 1	AEEVATFFAK;AVALYFIDK;DEDDADYKPK;EDIKPLK;ELTAPDENIPAK;EMTNEEK;EQLADAR;GPVFAPPYEPLPENVK;HLQDLMEGLTAK;IEPPGLFR;IMPEDIIINCSK;KEMTNEEK;KLEEEEDGK;KLEEEEDGKLK;KVPEPDNK;KWGVPIEK;LEEQLMK;LEVQATDREENK;LNTGILNK;MLDHEYTTK;NIITNLSK;NLQLFMENKQPEDDLFDR;QIALGTSK;QPEDDLFDRLNTGILNK;SGDHLHNDSQIEADFR;SMMNLQTK;TYNASITLQQQLK;VPSPPPGHK;WWEEERYPEGIK;YIMLNPSSR;YYNKVPVEK
-4.2405	-4.35687	-4.29388	-4.22515	-4.30876	-4.1563	-0.0240622	0.189933	20	4	174.38	P11388	TOP2A	DNA topoisomerase 2-alpha	EKQDEQVGLPGK;ELILFSNSDNER;ENMTLQPK;EVTFVPGLYK;EWLTNFMEDR;EWLTNFMEDRR;EYHTDTTVK;FLEEFITPIVK;FLYDDNQR;GFQQISFVNSIATSK;GIPVVEHK;GIPVVEHKVEK;HVDYVADQIVTK;IFDEILVNAADNK;IMIMTDQDQDGSHIK;IVGLQYK;KEWLTNFMEDR;KEWLTNFMEDRR;KSPSDLWK;QIMENAEINNIIK
3.95482	3.80482	3.85784	3.8509	3.82767	3.8566	0.0514126	0.763873	32	32	59.256	P11413	G6PD	Glucose-6-phosphate 1-dehydrogenase	AEQVALSR;DGLLPENTFIVGYAR;DLQSSDR;EELFQGDAFHQSDTHIFIIMGASGDLAK;EMVQNLMVLR;EPFGTEGR;GGYFDEFGIIR;GPTEADELMK;GSTTATFAAVVLYVENER;GYLDDPTVPR;IDHYLGK;IFGPIWNR;IIVEKPFGR;KPGMFFNPEESELDLTYGNR;KQSEPFFK;LEDFFAR;LFYLALPPTVYEAVTK;LKLEDFFAR;LNSHMNALHLGSQANR;LPDAYER;LQFHDVAGDIFHQQCK;LSNHISSLFR;LTVADIR;LTVADIRK;NSYVAGQYDDAASYQR;QSEPFFK;RNELVIR;RVGFQYEGTYK;VGFQYEGTYK;VQPNEAVYTK;WDGVPFILR;WVNPHKL
0.292719	0.096386	0.176648	0.129644	0.116427	0.162956	0.0688146	0.667453	7	7	17.776	P11441	UBL4A	Ubiquitin-like protein 4A	FLHPEVTETMEK;HFSAADASR;LADSPPPQVWQLISK;LNLVVKPLEK;LSDYSIGPNSK;LTLDDIER;VLLEEGEAQR
2.10964	2.14838	2.11316	2.14007	2.1455	2.16229	-0.0437584	2.09001	31	31	129.63	P11498	PC	Pyruvate carboxylase, mitochondrial	AAYGGGGR;ADEAYLIGR;AEAEAQAEELSFPR;ALAVSDLNR;ASPSPTDPVVPAVPIGPPPAGFR;AYSEALAAFGNGALFVEK;AYVEANQMLGDLIK;DAHQSLLATR;DFTATFGPLDSLNTR;DHPTAATK;ELIPNIPFQMLLR;EMHFHPK;ENNVDAVHPGYGFLSER;FIGPSPEVVR;GANAVGYTNYPDNVVFK;GLAPVQAYLHIPDIIK;GQIGAPMPGK;GTPLDTEVPMER;HGEEVTPEDVLSAAMYPDVFAHFK;HYFIEVNSR;IAPYVAHNFSK;IVGDLAQFMVQNGLSR;LDNASAFQGAVISPHYDSLLVK;LEYKPIK;LTSDSVK;SLPDLGLR;VEGRPGASLPPLDLQALEK;VFDYSEYWEGAR;VTTEDP…
-2.27634	-1.595	-2.01575	-1.75425	-1.66922	-1.98113	-0.332574	1.29589	15	11	426.77	P11532	DMD	Dystrophin	AHLEDKYR;DAELIAEAK;GLSPLPSPPEMMPTSPQSPR;IEHYASR;IFLTEQPLEGLEK;ILADLEEENR;ILLSWVR;LEPQSMVWLPVLHR;LGLLLHDSIQIPR;LGSLNLR;LLQQFPLDLEK;MQILEDHNK;QLESQLHR;QLGEVASFGGSNIEPSVR;VAAAETAK
4.28003	3.9805	4.14909	4.05122	4.01582	4.05491	0.132373	1.08177	47	46	101.53	P11586	MTHFD1	C-1-tetrahydrofolate synthase, cytoplasmic;Methylenetetrahydrofolate dehydrogenase;Methenyltetrahydrofolate cyclohydrolase;Formyltetrahydrofolate synthetase;C-1-tetrahydrofolate synthase, cytoplasmic, N-terminally processed	AAEEIGIK;AAQAPSSFQLLYDLK;APAEILNGK;AYIQENLELVEK;DDSNLYINVK;EHGAFDAVK;EIGLLSEEVELYGETK;EISAQIR;EQVPGFTPR;ETGVPIAGR;FSDIQIR;GALALAQAVQR;GDILVVATGQPEMVK;GEPVSAEDLGVSGALTVLMK;GFSNLKK;GVPTGFILPIR;IFHELTQTDK;ITIGQAPTEK;IYGADDIELLPEAQHK;KGEPVSAEDLGVSGALTVLMK;KITIGQAPTEK;KVVGDVAYDEAK;KVVGDVAYDEAKER;LAILQVGNR;LDIDPETITWQR;LKNQVTQLK;LPVEDKIR;LVGPEGFVVTEAGFGADIGMEK;MFGIPVVVAVNAFK;MHGGGPTVTAGLPLPK;MVVASSK;NQ…
3.23113	3.01875	3.10483	3.04315	3.08008	3.13931	0.0667725	0.626434	43	43	274.37	P11717	IGF2R	Cation-independent mannose-6-phosphate receptor	AGFTAAYSEK;ALSSLHGDDQDSEDEVLTIPEVK;DGAGNSFDLSSLSR;DGIIVLK;DIDTLRDPGSQLR;DQGSFTEVVSISNLGMAK;EGQENGHITTK;EPQGFHK;FLHQDIDSGQGIR;GAGAESSHPVR;GGTPYNNER;GHQAFDVGQPR;GTADAFIVR;GTQRPVFLK;GVSMGTPK;HAEPEQNWEAVDGSQTETEK;HAEPEQNWEAVDGSQTETEKK;HDLNPLIK;KPWTAVDTSVDGR;KSDTSQVK;KVGTSDK;LGVIGDK;LTYENGLLK;LVLSYVR;LVSFHDDSDEDLLHI;NAQSNALQER;REPQGFHK;RETVISK;RYDLSALVR;SEGGLGGNWYAMDNSGEHVTWR;SFSLGDIYFK;SSNVSYK;SSSAQQ…
3.90335	3.78159	3.84124	3.81001	3.81792	3.84777	0.025966	0.361283	12	12	39.724	P11766	ADH5	Alcohol dehydrogenase class-3	AALEACHK;AAVAWEAGKPLSIEEIEVAPPK;AFELMHSGK;GLMPDGTSR;GTAFGGWK;IDPLAPLDK;IIGVDINK;IIGVDINKDK;IKVDEFVTHNLSFDEINK;LVSEYMSK;SVESVPK;VDEFVTHNLSFDEINK
-0.728897	-0.63179	-0.758729	-0.681959	-0.647788	-0.712372	-0.0530974	1.09234	9	8	33.729	P11802	CDK4	Cyclin-dependent kinase 4	ALQHSYLHKDEGNPE;APPPGLPAETIK;APPPGLPAETIKDLMR;DLKPENILVTSGGTVK;IFDLIGLPPEDDWPR;LADFGLAR;RLEAFEHPNVVR;VTLVFEHVDQDLR;YEPVAEIGVGAYGTVYK
2.78136	2.38419	2.63628	2.53241	2.42311	2.61091	0.185763	1.26853	15	6	34.769	P11908	PRPS2	Ribose-phosphate pyrophosphokinase 2	ENIAEWK;INNAAFEAVVVTNTIPQEDK;KANEVDR;KFSNQETSVEIGESVR;LGLELGK;LLSAGATK;LNVEFALIHK;MVLVGDVK;MVLVGDVKDR;PNIVLFSGSSHQDLSQR;RVTSIADR;THNGESVSYLFSHVPL;VTAVIPCFPYAR;VTSIADR;VYAILTHGIFSGPAISR
4.01743	3.86824	3.93584	3.91193	3.94857	3.9227	0.0323385	0.452636	31	22	70.67	P11940;Q9H361;Q4VXU2;Q96DU9	PABPC1;PABPC3	Polyadenylate-binding protein 1;Polyadenylate-binding protein 3	AKEFTNVYIK;ALDTMNFDVIK;ALYDTFSAFGNILSCK;AVDEMNGK;AVNSATGVPTV;AVTEMNGR;EAELGAR;EFSPFGTITSAK;EFTNVYIK;FGPALSVK;FSPAGPILSIR;GFGFVCFSSPEEATK;GFGFVSFER;GYGFVHFETQEAAER;IVATKPLYVALAQR;KEFSPFGTITSAK;KSGVGNIFIK;LFPLIQAMHPTLAGK;MNPSAPSYPMASLYVGDLHPDVTEAMLYEK;NFGEDMDDER;NFGEDMDDERLK;NFGEDMDDERLKDLFGK;NLDDGIDDER;NLDDGIDDERLR;QAHLTNQYMQR;SGVGNIFIK;SKVDEAVAVLQAHQAK;SLGYAYVNFQQPADAER;VMTDESGK;VVCDENGSK;YQGVNLY…
1.39395	1.0945	1.27293	1.18103	1.15886	1.22525	0.136224	1.53363	13	13	28.768	P12004	PCNA	Proliferating cell nuclear antigen	AEDNADTLALVFEAPNQEK;ATPLSSTVTLSMSADVPLVVEYK;FSASGELGNGNIK;IADMGHLK;IEDEEGS;KVLEALK;LVQGSILK;LVQGSILKK;MPSGEFAR;NLAMGVNLTSMSK;SEGFDTYR;VSDYEMK;YLNFFTK
-1.45757	-1.8556	-1.66713	-1.7708	-1.75273	-1.71045	0.152974	1.03261	2	2	12.155	P12074	COX6A1	Cytochrome c oxidase subunit 6A1, mitochondrial	SHHGEHERPEFIAYPHLR;TKPFPWGDGNHTLFHNPHVNPLPTGYEDE
2.67673	2.47672	2.55445	2.51385	2.51511	2.54678	0.0703278	0.77153	23	17	57.41	P12081	HARS1	Histidine--tRNA ligase, cytoplasmic	AALEELVK;AQLGPDESK;ASAELIEEEVAK;DQGGELLSLR;EDLVEEIKR;EKVFDVIIR;GLAPEVADR;GLDYYTGVIYEAVLLQTPAQAGEEPLGVGSVAAGGR;HGAEVIDTPVFELK;IFSIVEQR;IGDYVQQHGGVSLVEQLLQDPK;ISFDLSLAR;LEALEEK;LKAQLGPDESK;LVSELWDAGIK;QALEGLGDLK;REDLVEEIK;REDLVEEIKR;TTETQVLVASAQK;VFDVIIR;VSWEEVKNEMVGEK;YDGLVGMFDPK;YDLTVPFAR
0.393898	0.340416	0.472461	0.353775	0.345183	0.374773	0.139006	0.953714	6	5	181.06	P12107	COL11A1	Collagen alpha-1(XI) chain	ALDFHNSPEGISK;EKPGSWFSEFK;GEDGEIGPR;GETGFQGK;GEVGQIGPR;SPVFLFEDHTGKPAPEDYPLFR
-0.402653	-0.259008	-0.372256	-0.304649	-0.309411	-0.325138	-0.0621459	1.72492	10	10	108.53	P12109	COL6A1	Collagen alpha-1(VI) chain	AVQEAQR;ENYAELLEDAFLK;GLEQLLVGGSHLK;GVFHQTVSR;LKPYGALVDK;LLLFSDGNSQGATPAAIEK;LSIIATDHTYR;QVNEPHIR;VAVVQYSGTGQQRPER;VFSVAITPDHLEPR
-2.21368	-1.745	-2.23954	-2.01734	-1.82578	-2.1666	-0.258025	1.1576	4	4	108.58	P12110	COL6A2	Collagen alpha-2(VI) chain	AAVFHEK;LFAVAPNQNLK;LGEQNFHK;NNNCPEK
2.18079	2.16922	2.09853	2.21544	2.12573	2.08495	-0.0411631	0.277505	18	6	33.064	P12235	SLC25A4	ADP/ATP translocase 1	AAYFGVYDTAK;DFLAGGVAAAVSK;EFHGLGDCIIK;EQGFLSFWR;GADIMYTGTVDCWR;GAWSNVLR;GDHAWSFLK;GMLPDPK;GNLANVIR;IAKDEGAK;KGADIMYTGTVDCWR;LAADVGK;LLLQVQHASK;MMMQSGR;QLFLGGVDR;TAVAPIER;YFPTQALNFAFK;YFPTQALNFAFKDK
4.31531	4.14432	4.21221	4.2167	4.15236	4.18042	0.0593955	0.655298	22	7	32.866	P12236	SLC25A6	ADP/ATP translocase 3;ADP/ATP translocase 3, N-terminally processed	AAYFGVYDTAK;DFLAGGIAAAISK;EQGVLSFWR;GADIMYTGTVDCWR;GAWSNVLR;GLGDCLVK;GMGGAFVLVLYDELK;GMGGAFVLVLYDELKK;GMLPDPK;GNLANVIR;IFRDEGGK;KGADIMYTGTVDCWR;KIFRDEGGK;LAADVGK;LLLQVQHASK;MMMQSGR;MTEQAISFAK;QIFLGGVDK;TAVAPIER;TEQAISFAK;YFPTQALNFAFK;YFPTQALNFAFKDK
3.3117	2.925	3.12873	3.01858	3.00627	3.11159	0.150565	1.05713	21	19	55.804	P12268	IMPDH2	Inosine-5-monophosphate dehydrogenase 2	AMMYSGELK;DKYPNLQVIGGNVVTAAQAK;DYPLASK;EANEILQR;EDLVVAPAGITLK;FGVPVIADGGIQNVGHIAK;GKLPIVNEDDELVAIIAR;GMGSLDAMDK;HLSSQNR;KYEQGFITDPVVLSPK;LPIVNEDDELVAIIAR;LVGIISSR;NLIDAGVDALR;REDLVVAPAGITLK;RFGVPVIADGGIQNVGHIAK;TSSAQVEGGVHSLHSYEK;VAQGVSGAVQDK;VRDVFEAK;YEQGFITDPVVLSPK;YFSEADK;YFSEADKIK
4.81793	4.59631	4.68444	4.61901	4.62034	4.66571	0.0863609	0.77956	120	120	267.29	P12270	TPR	Nucleoprotein TPR	AAVLQQVLER;AIESMEQQLSELK;AIESMEQQLSELKK;AIQDHLLEVEQSK;AIQDHLLEVEQSKDQMEK;ASTALSNEQQAR;ASWEERER;AVASLSVK;AVEELHK;DEPQEPSNK;DEPQEPSNKVPEQQR;DLSQQIR;DPDTEEYRK;EAGEANK;EDVDDLVSQLR;EGVQGPLNVSLSEEGK;EITSLHER;EKEIAETR;EKEIAETRFEVAQVESLR;EKGNEILELK;EKQELQDDK;EKQELQDDKR;EKVQVTAK;ELEIAQDR;ELENANDLLSATK;ELENANDLLSATKR;ELLHSQNTWLNTELK;ELMLHAADVEALQAAK;ELQELQDSLNAER;EQQASMEEK;EREEQETTSSK;ESLLAEQR;ETLNQAETK;FE…
4.45425	4.27267	4.31576	4.26611	4.27178	4.27622	0.077638	0.651671	19	19	36.474	P12271	RLBP1	Retinaldehyde-binding protein 1	AKDELNER;AKDELNEREETR;AQLEQLTTK;AVAEQLFGPQAQAENTAF;CTIEAGYPGVLSSR;DELNEREETREEAVR;DHGPVFGPCSQLPR;DSGFFLR;EETREEAVR;ELQEMVQAQAASGEELAVAVAER;GFTMQQAASLR;KMVDMLQDSFPAR;LLENEETQINGFCIIENFK;LQYPELFDSLSPEAVR;MVDMLQDSFPAR;MVPEEEQELR;SEGVGTFR;VFVHGDDLSGFYQEIDENILPSDFGGTLPK;VQEKDSGFFLR
3.40326	3.11173	3.25165	3.22376	3.1839	3.24856	0.0757637	0.583289	18	18	42.644	P12277;P06732	CKB	Creatine kinase B-type	DLFDPIIEDR;FCTGLTQIETLFK;FPAEDEFPDLSAHNNHMAK;FSEVLKR;GIWHNDNK;GTGGVDTAAVGGVFDVSNADR;HGGYKPSDEHK;LAVEALSSLDGDLAGR;LEQGQAIDDLMPAQK;LGFSEVELVQMVVDGVK;LLIEMEQR;LRFPAEDEFPDLSAHNNHMAK;PFSNSHNALK;RGTGGVDTAAVGGVFDVSNADR;SMTEAEQQQLIDDHFLFDKPVSPLLLASGMAR;TDLNPDNLQGGDDLDPNYVLSSR;TFLVWVNEEDHLR;VLTPELYAELR
4.03248	3.66791	3.88493	3.78061	3.77571	3.86292	0.133159	1.14701	28	28	36.375	P12429	ANXA3	Annexin A3	ALLTLADGR;ALLTLADGRR;ASIWVGHR;DESLKVDEHLAK;DISQAYYTVYK;DISQAYYTVYKK;DIVDSIK;DYPDFSPSVDAEAIQK;EYQAAYGK;GAGTNEDALIEILTTR;GDLSGHFEHLMVALVTPPAVFDAK;GIGTDEFTLNR;GIGTDEK;HYGYSLYSAIK;KALLTLADGR;KSLGDDISSETSGDFR;KSLGDDISSETSGDFRK;LTFDEYR;MLISILTER;NTPAFLAER;QDAQILYK;RDESLKVDEHLAK;SDTSGDYEITLLK;SEIDLLDIR;SLGDDISSETSGDFR;SLGDDISSETSGDFRK;VDEHLAK;WGTDEDKFTEILCLR
-4.06086	-3.65291	-4.02782	-3.73088	-3.88468	-3.94119	-0.198819	1.44555	5	3	47.036	P12532	CKMT1A	Creatine kinase U-type, mitochondrial	GIWHNNEK;HTTDLDASK;IPTPVIHTK;LGYILTCPSNLGTGLR;VVVDALSGLK
2.63454	2.57485	2.5776	2.56103	2.58938	2.5903	0.0144329	0.258919	19	19	50.47	P12694	BCKDHA	2-oxoisovalerate dehydrogenase subunit alpha, mitochondrial	AVAENQPFLIEAMTYR;EAGVLMYR;GDGIAAR;GPGYGIMSIR;HFVTISSPLATQIPQAVGAAYAAK;HLQTYGEHYPLDHFDK;HYLLSQGWWDEEQEK;ILYESQR;KQQESLAR;KVMEAFEQAER;LEFIQPNVISGIPIYR;QDHPISR;QGQIINPSEDPHLPK;QQESLAR;SMTLLNTMDR;SVDEVNYWDK;SVDEVNYWDKQDHPISR;VDGNDVFAVYNATK;VMEAFEQAER
5.52662	5.30567	5.42118	5.39545	5.37991	5.41616	0.0639547	0.858314	67	43	103.06	P12814;Q08043	ACTN1	Alpha-actinin-1	ACLISLGYDIGNDPQGEAEFAR;AETAANR;AGTQIENIEEDFR;AGTQIENIEEDFRDGLK;AIMTYVSSFYHAFSGAQK;ALDFIASK;ASFNHFDR;ASFNHFDRDHSGTLGPEEFK;ASIHEAWTDGK;ASIHEAWTDGKEAMLR;ATLPDADK;ATLPDADKER;CQLEINFNTLQTK;DDPLTNLNTAFDVAEK;DGLGFCALIHR;DHSGTLGPEEFK;DLLLDPAWEK;DQALTEEHAR;DYETATLSEIK;EGLLLWCQR;ELPPDQAEYCIAR;ETADTDTADQVMASFK;FAIQDISVEETSAK;GISQEQMNEFR;GYEEWLLNEIR;GYEEWLLNEIRR;HEAFESDLAAHQDR;HRPELIDYGK;HTNYTMEHIR;ICDQWDNLG…
-3.81662	-3.66807	-3.97712	-3.77332	-3.71021	-3.95495	-0.140344	0.608454	2	1	97.455	P12830	CDH1	Cadherin-1;E-Cad/CTF1;E-Cad/CTF2;E-Cad/CTF3	GLDARPEVTR;LADMYGGGEDD
2.57058	2.40366	2.47204	2.4779	2.44773	2.49574	0.0282974	0.311672	16	10	59.834	P12931;P06239;P42685;Q9H3Y6	SRC	Proto-oncogene tyrosine-protein kinase Src	AANILVGENLVCK;AGPLAGGVTTFVALYDYESR;EVLDQVER;GPSAAFAPAAAEPK;GSLLDFLK;GSLLDFLKGETGK;KLDSGGFYITSR;LFGGFNSSDTVTSPQR;LIEDNEYTAR;LLLNAENPR;TETDLSFK;TLKPGTMSPEAFLQEAQVMK;TQFNSLQQLVAYYSK;VADFGLAR;VPYPGMVNR;WTAPEAALYGR
2.92855	2.88038	2.8371	2.86866	2.85699	2.85724	-0.00200526	0.0186283	16	16	54.548	P12955	PEPD	Xaa-Pro dipeptidase	AAATGPSFWLGNETLK;AFTPFSGPK;AVMGAMKPGVWWPDMHR;AVYEAVLR;EASFDGISK;FEVNNTILHPEIVECR;GVNTDSGSVCR;IDEPGLR;ISSEAHR;KNPAVQAGSIVVLQGGEETQR;LPASHATWMGK;NPAVQAGSIVVLQGGEETQR;STLFVPR;TDMELEVLR;VPLALFALNR;YCTDTGVLFR
4.66552	4.34848	4.49089	4.41077	4.4118	4.49457	0.116838	0.881689	48	48	69.842	P12956	XRCC6	X-ray repair cross-complementing protein 6	AGDLRDTGIFLDLMHLK;ALKPPPIK;DIISIAEDEDLR;DIISIAEDEDLRVHFEESSK;DKNSVNFK;DLLAVVFYGTEK;DSLIFLVDASK;DTGIFLDLMHLK;EETEELK;EETEELKR;ELVYPPDYNPEGK;ETNEPVK;FTVPMLK;HDNEGSGSK;IISSDRDLLAVVFYGTEK;IISSDRDLLAVVFYGTEKDK;ILELDQFK;ILELDQFKGQQGQK;IMATPEQVGK;IMLFTNEDNPHGNDSAK;IQVTPPGFQLVFLPFADDKR;KHDNEGSGSK;KMPFTEK;KPGGFDISLFYR;KQELLEALTK;LEDLLRK;LGSLVDEFK;LGSLVDEFKELVYPPDYNPEGK;NIPPYFVALVPQEEELDDQK;NIYVLQELDNPGAK;…
4.11177	3.69304	3.88133	3.77058	3.79196	3.87279	0.152685	0.887781	40	40	82.704	P13010	XRCC5	X-ray repair cross-complementing protein 5	AFREEAIK;ANPQVGVAFPHIK;DEKTDTLEDLFPTTK;DKPSGDTAAVFEEGGDVDDLLDMI;DQVTAQEIFQDNHEDGPTAK;EDGSGDRGDGPFR;EDIIQGFR;EEASGSSVTAEEAK;EEASGSSVTAEEAKK;EGLEIVK;EPLPPIQQHIWNMLNPPAEVTTK;ETVYCLNDDDETEVLK;FFMGNQVLK;GITEQQK;GITEQQKEGLEIVK;HIEIFTDLSSR;HLMLPDFDLLEDIESK;IQPGSQQADFLDALIVSMDVIQHETIGK;KDEKTDTLEDLFPTTK;KKDQVTAQEIFQDNHEDGPTAK;KTWTVVDAK;KVITMFVQR;KYAPTEAQLNAVDALIDSMSLAK;LFQCLLHR;LGGHGPSFPLK;LKTEQGGAHFSVSSL…
-5.00581	-4.92058	-4.97362	-4.87097	-4.91813	-4.97749	-0.0596577	0.835246	2	2	34.645	P13051	UNG	Uracil-DNA glycosylase	ELSTDIEDFVHPGHGDLSGWAK;KAPAGQEEPGTPPSSPLSAEQLDR
3.20553	2.89641	3.05227	2.95034	2.95731	3.06457	0.113409	0.838739	16	16	19.576	P13073	COX4I1	Cytochrome c oxidase subunit 4 isoform 1, mitochondrial	AHESVVK;ASWSSLSMDEK;ASWSSLSMDEKVELYR;DHPLPEVAHVK;EKASWSSLSMDEK;ESFAEMNR;FKESFAEMNR;HLSASQK;HYVYGPLPQSFDK;HYVYGPLPQSFDKEWVAK;RDHPLPEVAHVK;SEDFSLPAYMDR;SEDFSLPAYMDRR;VNPIQGLASK;WDYEKNEWK;WDYEKNEWKK
-4.32545	-4.56319	-4.52806	-4.55786	-4.50236	-4.58716	0.0960865	0.629124	1	1	70.58	P13196	ALAS1	5-aminolevulinate synthase, non-specific, mitochondrial	VSHLLQDNLPK
-3.45331	-3.48016	-3.53477	-3.53635	-3.49737	-3.49666	0.0298328	0.420673	1	1	27.963	P13284	IFI30	Gamma-interferon-inducible lysosomal thiol reductase	GMQLMHANAQR
1.16107	0.790525	1.08268	0.941778	0.865764	1.03255	0.157848	1.31959	6	6	44.96	P13473	LAMP2	Lysosome-associated membrane glycoprotein 2	EQTVSVSGAFQINTFDLR;GILTVDELLAIR;HHHAGYEQF;IPLNDLFR;SHTALLR;YLDFVFAVK
2.70528	2.17704	2.45673	2.22863	2.33464	2.41013	0.217377	1.05047	12	12	49.973	P13489	RNH1	Ribonuclease inhibitor	DISSALR;DSPCQLEALK;ELALGSNK;ELDLSNNCLGDAGILQLVESVR;ELSLAGNELGDEGAR;ELTVSNNDINEAGVR;ESLKELSLAGNELGDEGAR;LDDCGLTEAR;LEDAGVR;LGDVGMAELCPGLLHPSSR;SLDIQSLDIQCEELSDAR;VNPALAELNLR
-0.123615	0.0546913	-0.170499	-0.139309	0.049077	-0.0837135	-0.0987333	0.780861	6	6	94.573	P13591	NCAM1	Neural cell adhesion molecule 1	AAFSKDESKEPIVEVR;AAHFVFR;ALSSEWKPEIR;AVGEEVWHSK;GLGEISAASEFK;TPNHDGGK
-2.51023	-1.90592	-2.38409	-2.00431	-2.05515	-2.43798	-0.335522	1.03925	2	2	114.9	P13612	ITGA4	Integrin alpha-4	LPVGLYFIK;THQAFMR
0.5413	0.458927	0.4849	0.494473	0.461644	0.461792	0.00883675	0.0841	28	9	111.75	P13637;Q13733	ATP1A3	Sodium/potassium-transporting ATPase subunit alpha-3	AAVPDAVGK;ADIGVAMGIAGSDVSK;DLDDLKK;DVAGDASESALLK;EVAMTEHK;GGQDNIPVLK;GVGIISEGNETVEDIAAR;GVVVATGDR;IATLASGLEVGK;KADIGVAMGIAGSDVSK;LIFDNLK;LIFDNLKK;LIIVEGCQR;LNIPVSQVNPR;NLEAVETLGSTSTICSDK;NMVPQQALVIR;NSVFQQGMK;QAADMILLDDNFASIVTGVEEGR;QGAIVAVTGDGVNDSPALK;QGAIVAVTGDGVNDSPALKK;RNPGGWVEK;TDKLVNER;TGTLTQNR;TVNDLEDSYGQQWTYEQR;VAEIPFNSTNK;VDNSSLTGESEPQTR;VIMVTGDHPITAK;YQLSIHETEDPNDNR
5.46921	5.23993	5.347	5.31617	5.28068	5.34806	0.0753511	0.789852	52	51	95.337	P13639	EEF2	Elongation factor 2	AGIIASAR;ALLELQLEPEELYQTFQR;ARPFPDGLAEDIDK;ARPFPDGLAEDIDKGEVSAR;AYLPVNESFGFTADLR;CELLYEGPPDDEAAMGIK;DGAGFLINLIDSPGHVDFSSEVTAALR;DSVVAGFQWATK;EDLYLKPIQR;EGALCEENMR;EGIPALDNFLDK;EGIPALDNFLDKL;ETVSEESNVLCLSK;FSVSPVVR;GEGQLGPAER;GGGQIIPTAR;GHVFEESQVAGTPMFVVK;GPLMMYISK;GVQYLNEIK;IKPVLMMNK;IMGPNYTPGK;IMGPNYTPGKK;IWCFGPDGTGPNILTDITK;KEDLYLKPIQR;KIWCFGPDGTGPNILTDITK;KSDPVVSYR;KVEDMMK;LDIKLDSEDKDK;LDSEDKD…
4.78523	4.49426	4.63551	4.55806	4.52261	4.63213	0.113307	0.880535	50	50	72.932	P13667	PDIA4	Protein disulfide-isomerase A4	AATQFWR;DFPEYTFAIADEEDYAGEVK;DGDDVIIIGVFK;DKDPPIPVAK;DLEHLSK;DLGLSESGEDVNAAILDESGK;DLGLSESGEDVNAAILDESGKK;EDYKFHHTFSTEIAK;EFVTAFK;EFVTAFKK;EKYGIVDYMIEQSGPPSK;EVSQPDWTPPPEVTLVLTK;FAMEPEEFDSDTLR;FAMEPEEFDSDTLREFVTAFK;FDVSGYPTLK;FEGGDRDLEHLSK;FHHTFSTEIAK;FIEEHATK;GESDPAYQQYQDAANNLR;GESDPAYQQYQDAANNLREDYK;GQAVDYEGSR;GRPYDYNGPR;IDATSASVLASR;KFAMEPEEFDSDTLR;KGQAVDYEGSR;KGRPYDYNGPR;KLAPEYEK;KVSNDAK;LAPE…
4.02858	3.85036	3.92021	3.85898	3.84294	3.89849	0.0725683	0.660305	31	31	61.049	P13674	P4HA1	Prolyl 4-hydroxylase subunit alpha-1	AEEDKLEQIK;AEEDKLEQIKK;ATISNPITGDLETVHYR;DLVTSLK;DLVTSLKDYIK;DPEGFVGHPVNAFK;ELGTGNR;FHDIISDAEIEIVK;FILAPAK;FILAPAKQEDEWDKPR;GNLPGVK;GVAVDYLPER;IQDLTGLDVSTAEELQVANYGVGGQYEPHFDFAR;KDEPDAFK;KDEPDAFKELGTGNR;KGVAVDYLPER;KLLELDPEHQR;LLELDPEHQR;LNTEWSELENLVLK;LQDTYNLDTDTISK;LTSTATK;LTSTATKDPEGFVGHPVNAFK;QEDEWDKPR;QYFPNDEDQVGAAK;RLNTEWSELENLVLK;RPCTLSELE;SASDDQSDQK;SAWLSGYENPVVSR;VAYTEADYYHTELWMEQALR;VSV…
-0.0951195	-0.365173	-0.325191	-0.324295	-0.38625	-0.298395	0.093106	0.520088	6	6	36.598	P13686	ACP5	Tartrate-resistant acid phosphatase type 5	EMTVTYIEASGK;FHYGTEDSLGGFAYVEISSK;FQETFEDVFSDR;FVAVGDWGGVPNAPFHTAR;TQLSWLK;WNFPSPFYR
3.63648	3.24486	3.54476	3.42001	3.36461	3.49469	0.14438	1.34651	9	9	19.595	P13693;Q56UQ5;Q9HAU6	TPT1	Translationally-controlled tumor protein	DGLEMEK;DLISHDEMFSDIYK;EDGVTPYMIFFK;EIADGLCLEVEGK;GKLEEQRPER;HILANFK;LEEQRPER;VKPFMTGAAEQIK;YIKDYMK
1.82355	1.55377	1.69354	1.64969	1.61782	1.68765	0.0905781	0.928186	12	12	36.294	P13716	ALAD	Delta-aminolevulinic acid dehydratase	AAVLEAMTAFR;AVDRDVR;EALMAHGLGNR;EGADMLMVKPGMPYLDIVR;GSAADSEESPAIEAIHLLR;LAEVALAYAK;LEEMLRPLVEEGLR;MQPQSVLHSGYFHPLLR;RLEEMLRPLVEEGLR;SSPAFGDR;SSPAFGDRR;VSVMSYSAK
-1.76861	-1.65316	-1.81591	-1.7309	-1.68485	-1.72635	-0.106666	1.427	14	7	70.288	P13796	LCP1	Plastin-2	ALENDPDCR;AYYHLLEQVAPK;FSLVGIGGQDLNEGNR;GDEEGVPAVVIDMSGLR;IGLFADIELSR;ISFDEFIK;KLENCNYAVELGK;LSPEELLLR;MINLSVPDTIDER;VNDDIIVNWVNETLR;VNKPPYPK;VYALPEDLVEVNPK;YAFVNWINK;YPALHKPENQDIDWGALEGETR
4.98855	4.62071	4.85036	4.68461	4.75572	4.81987	0.152705	1.2488	42	33	70.81	P13797	PLS3	Plastin-3	AESMLQQADK;ALENDPDCR;ANDDIIVNWVNR;AVGDGIVLCK;AYFHLLNQIAPK;DELDELKEAFAK;DGETLEELMK;EANMPLPGYK;EGICALGGTSELSSEGTQHSYSEEEK;HVIPMNPNTDDLFK;IDINMSGFNETDDLK;IDINMSGFNETDDLKR;IGLFADIELSR;IKVPVDWSK;INNFSADIK;INNFSADIKDSK;KLENCNYAVELGK;LMLDGDR;LMLDGDRNK;LNLAFVANLFNK;LSPEELLLR;MDEMATTQISK;MDEMATTQISKDELDELK;MDEMATTQISKDELDELKEAFAK;MINLSVPDTIDER;NEALAALLR;QFVTPADVVSGNPK;RAESMLQQADK;RYTLNVLEDLGDGQK;SGNLTEDDK…
3.10983	2.92105	3.02906	3.01512	2.94217	2.99479	0.0662092	0.824312	21	21	81.224	P13798	APEH	Acylamino-acid-releasing enzyme	AESFFQTK;AGGTGPGEEK;ALDVSASDDEIAR;ESPSGTMK;GDQFVFYEDWGENMVSK;GSTGFGQDSILSLPGNVGHQDVK;KAGGTGPGEEK;KPDQAIK;QDLFAVDTQVGTVTSLTAGGSGGSWK;QFLEVWEK;QVLLSEPEEAAALYR;QYLVFHDGDSVVFAGPAGNSVETR;SALYYVDLIGGK;SFNLSALEK;TPLLLMLGQEDR;TPLLLMLGQEDRR;TVHTEWTQR;VGFLPSAGK;VLQPPPEQENVQYAGLDFEAILLQPGSPPDK;VTSVVVDVVPR;VVFDSAQR
3.24421	3.07189	3.10625	3.08058	3.09497	3.12112	0.0482012	0.407576	15	15	35.079	P13804	ETFA	Electron transfer flavoprotein subunit alpha, mitochondrial	AAVDAGFVPNDMQVGQTGK;ASSTSPVEISEWLDQK;DPEAPIFQVADYGIVADLFK;GLLPEELTPLILATQK;GTSFDAAATSGGSASSEK;LEVAPISDIIAIK;LGGEVSCLVAGTK;LLYDLADQLHAAVGASR;SDRPELTGAK;SPDTFVR;TIYAGNALCTVK;VLVAQHDVYK;VVPEMTEILK;VVPEMTEILKK;VVVSGGR
2.86909	2.57914	2.74491	2.70166	2.67344	2.75551	0.0677872	0.580874	24	24	83.785	P13807;P54840	GYS1	Glycogen [starch] synthase, muscle	AFPEHFTYEPNEADAAQGYR;AIFATQR;AKVTGDEWGDNYFLVGPYTEQGVR;FSAMHEFQNLHAQSK;GADVFLEALAR;GHFYGHLDFNLDK;IGLFNSSADR;KFSAMHEFQNLHAQSK;KLYESLLVGSLPDMNK;KPDIVTPNGLNVK;KQLWDTANTVK;LPVATIFTTHATLLGR;LSDLLDWK;LYESLLVGSLPDMNK;MLDKEDFTMMK;NGPLEEDGERYDEDEEAAK;QLWDTANTVK;TLDSMNSK;TNNFNVETLK;TQVELLEAPTPALK;TQVELLEAPTPALKR;VGGIYTVLQTK;VIFHPEFLSSTSPLLPVDYEEFVR;VTGDEWGDNYFLVGPYTEQGVR
3.58047	3.39061	3.48396	3.4518	3.41527	3.46162	0.0613352	0.662816	19	17	45.518	P13861	PRKAR2A	cAMP-dependent protein kinase type II-alpha regulatory subunit	AASAYAVGDVK;AATIVATSEGSLWGLDR;ADEHVIDQGDDGDNFYVIER;APASVLPAATPR;GQYFGELALVTNKPR;GSFGELALMYNTPR;GTYDILVTK;IITQGEK;IVDVIGEK;KMFESFIESVPLLK;MFESFIESVPLLK;MFGSSVDLGNLGQ;NISHYEEQLVK;NLDQEQLSQVLDAMFER;QQPPDLVEFAVEYFTR;QSLGHPPPEPGPDR;SLEVSER;SNKDGGNQEVEIAR;SVGQYDNR
-2.21428	-2.15336	-2.26075	-2.21192	-2.12295	-2.26896	-0.0579681	0.512669	7	4	46.986	P13929	ENO3	Beta-enolase	AAVPSGASTGIYEALELR;AAVPSGASTGIYEALELRDGDK;DATNVGDEGGFAPNILENNEALELLK;GNPTVEVDLHTAK;HIADLAGNPDLILPVPAFNVINGGSHAGNK;IGAEVYHHLK;SGETEDTFIADLVVGLCTGQIK
-0.259504	-0.331396	-0.153367	-0.127649	-0.264153	-0.154821	0.0462983	0.204364	5	5	171.79	P13942	COL11A2	Collagen alpha-2(XI) chain	ERPQNQQPHR;FLYEDQTGRPQPPSQPVFR;GANEDELSPETSPYVK;GLPGESGPR;GLSLADGK
2.46221	2.18569	2.2885	2.20874	2.16137	2.27287	0.136878	0.997591	15	15	28.38	P13984	GTF2F2	General transcription factor IIF subunit 2	DLVDITK;EHPFVLQSVGGQTLTVFTESSSDK;EIGVQNVK;GELDLTGAK;HQYYNLK;HYQGEEK;LQIEESSKPVR;LSLEGIVVQR;LSQQLDK;MAERGELDLTGAK;NTWELKPEYR;QNTGVWLVK;QPVVYLK;VVTTNYKPVANHQYNIEYER;YLSQQWAK
-0.202887	-0.528175	-0.30951	-0.567507	-0.37386	-0.303177	0.128073	0.64131	2	2	14.177	P13987	CD59	CD59 glycoprotein	AGLQVYNK;FEHCNFNDVTTR
-6.34439	-6.8048	-6.48937	-6.53068	-6.44903	-6.47563	0.0516764	0.433603	2	2	37.895	P13995	MTHFD2	Bifunctional methylenetetrahydrofolate dehydrogenase/cyclohydrolase, mitochondrial;NAD-dependent methylenetetrahydrofolate dehydrogenase;Methenyltetrahydrofolate cyclohydrolase	LNNDDNVDGLLVQLPLPEHIDER;LVGDVDFEGVR
2.23456	1.81192	2.06076	1.90463	1.61048	2.1285	0.183849	0.442394	24	22	49.88	P14136	GFAP	Glial fibrillary acidic protein	AEMMELNDR;ALAAELNQLR;DNLAQDLATVR;EAASYQEALAR;ELQEQLAR;ETSLDTK;FADLTDAAAR;FASYIEK;FLEQQNK;GTNESLER;HEANDYRR;HLQEYQDLLNVK;ITIPVQTFSNLQIR;KIHEEEVR;KLLEGEENR;LADVYQAELR;LEAENNLAAYR;LEEEGQSLKDEMAR;LEVERDNLAQDLATVR;LLEGEENR;LQDETNLR;QEADEATLAR;SVSEGHLK;TVEMRDGEVIK
1.58551	0.491362	1.43842	0.98381	0.888642	1.14734	0.403983	1.41094	4	4	12.476	P14174	MIF	Macrophage migration inhibitory factor	IGGAQNR;LLCGLLAER;PMFIVNTNVPR;VYINYYDMNAANVGWNNSTFA
-4.05311	-3.34866	-4.26971	-3.52298	-3.45358	-3.84864	-0.500538	1.56989	1	1	18.848	P14209	CD99	CD99 antigen	ENAEQGEVDMESHR
3.72046	3.33274	3.60057	3.4747	3.40276	3.53601	0.165854	1.36272	25	25	59.425	P14314	PRKCSH	Glucosidase 2 subunit beta	AQQEQELAADAFK;DMEESIR;EEAEKPER;ERESLQQMAEVTR;ESLQQMAEVTR;ETMVTSTTEPSR;ILIEDWK;ILIEDWKK;KILIEDWK;KILIEDWKK;KLIELQAGK;KSLEDQVEMLR;LGGSPTSLGTWGSWIGPDHDK;LGGSPTSLGTWGSWIGPDHDKFSAMK;LIELQAGK;LIELQAGKK;LVSQKPK;LWEEQLAAAK;MPPYDEQTQAFIDAAQEAR;NKFEEAER;SEALPTDLPAPSAPDLTEPK;SLEDQVEMLR;SLKDMEESIR;TVKEEAEKPER;YEQGTGCWQGPNR
2.4193	2.34428	2.36845	2.35564	2.3799	2.36072	0.0352643	0.926447	7	7	48.275	P14324	FDPS	Farnesyl pyrophosphate synthase	ATPEQYQILK;EVLEYNAIGGK;IGTDIQDNK;KQDADSLQR;LKEVLEYNAIGGK;QDFVQHFSQIVR;VLTEDEMGHPEIGDAIAR
-4.99284	-4.74507	-4.89501	-4.86061	-4.89056	-4.82958	-0.0426559	0.332917	2	2	58.489	P14373	TRIM27	Zinc finger protein RFP	ELLQDIGDTLSR;IPEPWITPPDLQEK
-1.69621	-1.92555	-1.89472	-2.00785	-1.98372	-1.90135	0.119782	0.661451	5	5	50.513	P14384	CPM	Carboxypeptidase M	ASLIEYIK;GQVFDQNGNPLPNVIVEVQDR;LPSFWNNNK;SLTPDDDVFQYLAHTYASR;YVANMHGDETVGR
0.354904	-0.0575867	0.272235	0.123711	0.149961	0.205332	0.112328	0.981643	2	2	9.3959	P14406	COX7A2	Cytochrome c oxidase subunit 7A2, mitochondrial	GGVADALLYR;LFQEDDEIPLYLK
3.78068	3.50764	3.64707	3.56862	3.58667	3.62074	0.0951544	0.8995	23	23	36.573	P14550	AKR1A1	Aldo-keto reductase family 1 member A1	AASCVLLHTGQK;ALEALVAK;AVPREELFVTSK;AWRDPDEPVLLEEPVVLALAEK;DAGHPLYPFNDPY;DPDEPVLLEEPVVLALAEK;EDVGPGK;EELFVTSK;GDNPFPK;GLEVTAYSPLGSSDR;GLVQALGLSNFNSR;HHPEDVEPALR;HHPEDVEPALRK;HIDCAAIYGNEPEIGEALKEDVGPGK;KVICIPK;MPLIGLGTWK;QLNALNK;SEPGQVK;SPAQILLR;VFDFTFSPEEMK;YALSVGYR;YIVPMLTVDGK;YIVPMLTVDGKR
6.56079	6.37345	6.45697	6.41802	6.44697	6.48564	0.0333131	0.309846	50	49	57.936	P14618	PKM	Pyruvate kinase PKM	AEGSDVANAVLDGADCIMLSGETAK;AEGSDVANAVLDGADCIMLSGETAKGDYPLEAVR;AGKPVICATQMLESMIK;APIIAVTR;ASDVHEVR;ASDVHEVRK;CDENILWLDYK;DPVQEAWAEDVDLR;EAEAAIYHLQLFEELR;EAEAAIYHLQLFEELRR;FDEILEASDGIMVAR;FGVEQDVDMVFASFIR;GADFLVTEVENGGSLGSK;GADFLVTEVENGGSLGSKK;GDLGIEIPAEK;GDVVIVLTGWRPGSGFTNTMR;GDYPLEAVR;GIFPVLCK;GIFPVLCKDPVQEAWAEDVDLR;GSGTAEVELK;GSGTAEVELKK;GVNLPGAAVDLPAVSEK;GVNLPGAAVDLPAVSEKDIQDLK;IENHEGVR;IENHEGVR…
1.03726	0.738808	0.875264	0.844162	0.755162	0.863596	0.111327	0.829034	9	9	11.139	P14621	ACYP2	Acylphosphatase-2	GTVTGQVQGPEDK;GTVTGQVQGPEDKVNSMK;IGVVGWVK;LEYSNFSIR;MYTEDEAR;MYTEDEARK;STAQSLK;SVDYEVFGR;TNFSNEK
6.2451	5.96226	6.09868	5.98613	6.09604	6.09485	0.0755622	0.490352	67	65	92.468	P14625;Q58FF3	HSP90B1	Endoplasmin	AQAYQTGK;AYGDRIER;DISTNYYASQK;EAESSPFVER;EAVEKEFEPLLNWMK;EAVEKEFEPLLNWMKDK;EEASDYLELDTIK;EEEAIQLDGLNASQIR;EEKEESDDEAAVEEEEEEK;EFEPLLNWMK;EFGTNIK;EGSRTDDEVVQR;EGSRTDDEVVQREEEAIQLDGLNASQIR;EGVKFDESEK;EGVKFDESEKTK;EKNLLHVTDTGVGMTR;ELISNASDALDK;ELISNASDALDKIR;ESDDPMAYIHFTAEGEVTFK;ESTAEKDEL;ETLQQHK;EVEEDEYK;EVEEDEYKAFYK;FAFQAEVNR;FDESEKTK;FQSSHHPTDITSLDQYVER;GLFDEYGSK;GLFDEYGSKK;GTTITLVLK;GTTITLVLKEEA…
-0.412258	-0.571865	-0.481011	-0.511152	-0.513524	-0.487537	0.0477702	0.947786	8	6	22.764	P14649	MYL6B	Myosin light chain 6B	AEPAVPQAPQK;ALGQNPTNAEVLK;GQGTYEDYLEGFR;HVLTTLGEK;ILYSQCGDVMR;RVDFETFLPMLQAVAK;TQEPPVDLSK;VMGAELR
-4.67433	-5.04904	-4.83485	-5.04297	-4.97712	-4.82478	0.148294	0.74317	1	1	54.787	P14672	SLC2A4	Solute carrier family 2, facilitated glucose transporter member 4	ERPLSLLQLLGSR
1.18931	0.897949	1.07944	0.904558	0.91204	0.995735	0.183662	1.8176	12	12	60.393	P14679	TYR	Tyrosinase	DIDFAHEAPAFLPWHR;DLGYDYSYLQDSDPDSFQDYIK;EDYHSLYQSHL;ESYMVPFIPLYR;HRPLQEVYPEANAPIGHNR;HTISSDYVIPIGTYGQMK;KQLPEEK;NIFDLSAPEK;NIFDLSAPEKDK;NPGNHDK;QPLLMEKEDYHSLYQSHL;WEQEIQK
2.47149	2.20012	2.32443	2.24358	2.22476	2.30486	0.123075	1.1178	36	36	117.97	P14735	IDE	Insulin-degrading enzyme	AEQPHQHAMYYLR;AFIPQLLSR;DELKEALDDVTLPR;DLNAVAFR;EALDDVTLPR;EATPYPALIK;EMLAVDAPR;EQLGYIVFSGPR;ESLDDLTNLVVK;FIIQSEKPPHYLESR;GWFVYQQR;GWVNTLVGGQK;GYNDKQPILLK;HIQALAIR;IGNHITK;IVPIKDIR;LFSEVENK;LLMTEVAWTK;LRPENVR;MATFEIDEK;NEFIPTNFEILPLEK;NLYVTFPIPDLQK;NVPLPEFPEHPFQEEHLK;QDDKFFLPK;QEAIPDEVIK;QEAIPDEVIKK;SIEDMTEEAFQK;SNPGHYLGHLIGHEGPGSLLSELK;TEEWYGTQYK;TKEQLGYIVFSGPR;TLTKEDIIK;VEAFLITMEK;VLLISDPTTDK;V…
1.73196	1.26659	1.64774	1.6101	1.29292	1.60746	0.11002	0.344467	5	5	10.192	P14854	COX6B1	Cytochrome c oxidase subunit 6B1	AEDMETK;AEGTFPGK;AEGTFPGKI;FPNQNQTR;TAPFDSR
-3.68494	-3.5631	-3.88046	-3.57556	-3.42393	-3.61408	-0.124315	0.356405	2	2	76.471	P14859;P09086;Q9UKI9;REV__Q6AHZ1	POU2F1;POU2F2;POU2F3	POU domain, class 2, transcription factor 1;POU domain, class 2, transcription factor 2;POU domain, class 2, transcription factor 3	LKPLLEK;RIDTPSLEEPSDLEELEQFAK
3.79099	3.43624	3.56118	3.53055	3.47388	3.52344	0.123204	0.689337	23	22	64.132	P14866	HNRNPL	Heterogeneous nuclear ribonucleoprotein L	AITHLNNNFMFGQK;FSTPEQAAK;IEYAKPTR;ISRPGDSDDSR;LCFSTAQHAS;LKTDNAGDQHGGGGGGGGGAGAAGGGGGGENYDDPHK;LNVCVSK;LNVFKNDQDTWDYTNPNLSGQGDPGSNPNKR;MAAAGGGGGGGR;MGPPVGGHR;NDQDTWDYTNPNLSGQGDPGSNPNKR;NGVQAMVEFDSVQSAQR;NPNGPYPYTLK;QPAIMPGQSYGLEDGSCSYK;QPAIMPGQSYGLEDGSCSYKDFSESR;QQPDEQRR;SDALETLGFLNHYQMK;SKPGAAMVEMADGYAVDR;SSSGLLEWESK;TDNAGDQHGGGGGGGGGAGAAGGGGGGENYDDPHK;TPASPVVHIR;YGPQYGHPPPPPPPPEYGPHADSPVLMVYGLD…
3.60721	3.29795	3.49271	3.39026	3.34391	3.46635	0.131234	1.18497	28	28	57.136	P14868	DARS1	Aspartate--tRNA ligase, cytoplasmic	ADEVVWVR;ALHHGIDLEK;ATVNQDTR;AYIDSFR;EAGVEMGDEDDLSTPNEK;EIMDAAEDYAK;EKYDTDFYILDK;EKYDTDFYILDKYPLAVRPFYTMPDPR;ESIVDVEGVVR;FAANINK;FGAPPHAGGGIGLER;FLEPTLR;FQTEIQTVNK;GEEILSGAQR;GFVEIQTPK;IHDPQLLTER;IISAASEGGANVFTVSYFK;IYVISLAEPR;LLGHLVK;LPLQLDDAVRPEAEGEEEGR;QQQFNVQALVAVGDHASK;QSNSYDMFMR;QTSMFPR;TSTSQAVFR;VFSIGPVFR;VTMLFLGLHNVR;YGISSMIQSQEKPDR;YPLAVRPFYTMPDPR
2.67342	2.49858	2.67738	2.66745	2.66621	2.74143	0.0107733	0.105597	26	23	81.744	P14923	JUP	Junction plakoglobin	AAMIVNQLSK;AGDKDDITEPAVCALR;ALMGSPQLVAAVVR;ALPELTK;ATIGLIR;EAADAIDAEGASAPLMELLHSR;EGLLAIFK;HLTSNSPR;HPEAEMAQNSVR;HVAAGTQQPYTDGVR;ISEDKNPDYR;LAEPSQLLK;LIILANGGPQALVQIMR;LLNDEDPVVVTK;LLNQPNQWPLVK;LLWTTSR;LNYGIPAIVK;LVQLLVK;MEEIVEGCTGALHILAR;MVPLLNK;NEGTATYAAAVLFR;SAIVHLINYQDDAELATR;SGGIPALVR;TLVTQNSGVEALIHAILR;TMQNTSDLDTAR;VSVELTNSLFK
2.91892	2.45079	2.74447	2.60962	2.60104	2.72308	0.154826	1.01499	14	14	13.53	P14927	UQCRB	Cytochrome b-c1 complex subunit 7	ALDLNLK;DDTIYEDEDVK;DDTIYEDEDVKEAIR;EQWTKYEEENFYLEPYLK;EREEWAK;KEREEWAK;KWYYNAAGFNK;LGLMRDDTIYEDEDVKEAIR;LPENLYNDR;QAVSASGK;RLPENLYNDR;WLDGIRK;WYYNAAGFNK;YEEENFYLEPYLK
3.09512	3.04547	3.06176	3.19447	3.07141	3.03199	-0.0540689	0.378927	13	13	42.064	P15104	GLUL	Glutamine synthetase	DIVEAHYR;GGLDNAR;KGYFEDR;LTGFHETSNINDFSAGVANR;LVLCEVFK;QVYMSLPQGEK;RLTGFHETSNINDFSAGVANR;RPAETNLR;RPSANCDPFSVTEALIR;TLDSEPK;TTSASSHLNK;VQAMYIWIDGTGEGLR;YIEEAIEK
2.96983	2.65191	2.8728	2.77115	2.78542	2.87874	0.091046	0.891798	14	14	35.853	P15121;C9JRZ8	AKR1B1	Aldo-keto reductase family 1 member B1	DYPFHEEF;EELFIVSK;GIVVTAYSPLGSPDRPWAKPEDPSLLEDPR;HIDCAHVYQNENEVGVAIQEK;LLLNNGAK;LREQVVK;LWCTYHEK;NLVVIPK;REELFIVSK;SPPGQVTEAVK;TTAQVLIR;VAIDVGYR;VFDFELSSQDMTTLLSYNR;YKPAVNQIECHPYLTQEK
-2.15035	-2.61744	-2.312	-2.52322	-2.41709	-2.37957	0.181555	1.23472	3	3	45.302	P15151	PVR	Poliovirus receptor	RLEFVAAR;VLAKPQNTAEVQK;VQLTGEPVPMAR
2.4166	2.18815	2.24577	2.21609	2.20933	2.2582	0.0796356	0.631627	18	8	55.755	P15170	GSPT1	Eukaryotic peptide chain release factor GTP-binding subunit ERF3A	AYFETEK;AYFETEKK;DMGTVVLGK;EHAMLAK;EHVNVVFIGHVDAGK;ETWYLSWALDTNQEER;GQQLVMMPNK;HFTILDAPGHK;HLIVLINK;HNVEVLGILSDDVETDTVAPGENLK;KEHVNVVFIGHVDAGK;KGEFETGFEK;MDDPTVNWSNER;STIGGQIMYLTGMVDKR;SVDGPIR;SVVAPPGAPK;TFDAQIVIIEHK;YKDMGTVVLGK
1.819	1.7166	1.73922	1.77367	1.63135	1.695	0.0612939	0.53624	10	9	53.588	P15289	ARSA	Arylsulfatase A;Arylsulfatase A component B;Arylsulfatase A component C	AALLTGR;AQLDAAVTFGPSQVAR;DPGENYNLLGGVAGATPEVLQALK;GGLPLEEVTVAEVLAAR;GTTYEGGVR;GYLTGMAGK;MGMYPGVLVPSSR;QSLFFYPSYPDEVR;WHLGVGPEGAFLPPHQGFHR;YMAFAHDLMADAQR
-1.6985	-1.40378	-1.57303	-1.55889	-1.45675	-1.52039	-0.0938091	0.777139	4	4	43.92	P15291	B4GALT1	Beta-1,4-galactosyltransferase 1;Processed beta-1,4-galactosyltransferase 1	ETMLSDGLNSLTYQVLDVQR;GMSISRPNAVVGR;HISVAMDK;LPQLVGVSTPLQGGSNSAAAIGQSSGELR
5.50641	5.17488	5.40107	5.26327	5.33617	5.37387	0.0871595	0.642145	61	46	69.412	P15311	EZR	Ezrin	AKEAQDDLVK;AKEELER;AKFYPEDVAEELIQDITQK;ALQLEEER;ALQLEEERK;APDFVFYAPR;AQEEAER;AQEEAERLEADR;DDKLTPK;DDRNEEK;DNAMLEYLK;DQWEDRIQVWHAEHR;EAQDDLVK;EDEVEEWQHR;EGILSDEIYCPPETAVLLGSYAVQAK;EKEELMLR;ELSEQIQR;ENPLQFK;EVWYFGLHYVDNK;FGDYNKEVHK;FVIKPIDK;FVIKPIDKK;FYPEDVAEELIQDITQK;GFPTWLK;GMLKDNAMLEYLK;GTDLWLGVDALGLNIYEK;GTDLWLGVDALGLNIYEKDDK;GTDLWLGVDALGLNIYEKDDKLTPK;IALLEEARR;IAQDLEMYGINYFEIK;IDEFEAL;IGFPWSEI…
0.618593	0.624844	0.556012	0.557526	0.374949	0.557283	0.0772114	0.52326	2	2	29.819	P15328	FOLR1	Folate receptor alpha	DVSYLYR;EKPGPEDK
1.10388	0.786833	0.992349	0.785137	0.830955	0.878523	0.200711	1.9561	10	10	26.182	P15374	UCHL3	Ubiquitin carboxyl-terminal hydrolase isozyme L3	FLEESVSMSPEER;FMERDPDELR;FNAIALSAA;KFLEESVSMSPEER;MHFESGSTLK;SQGQDVTSSVYFMK;TEEEEKIK;VTHETSAHEGQTEAPSIDEK;WLPLEANPEVTNQFLK;YLENYDAIR
-1.52254	-1.13262	-1.49862	-1.37433	-1.1894	-1.454	-0.184355	1.08684	3	3	68.397	P15502	ELN	Elastin	AGYPTGTGVGPQAAAAAAAK;LPGGYGLPYTTGK;LPYGYGPGGVAGAAGK
2.09158	1.80072	1.9477	1.84493	1.89073	1.94535	0.10891	0.95339	11	6	17.149	P15531	NME1	Nucleoside diphosphate kinase A	DRPFFAGLVK;EHYVDLK;EHYVDLKDRPFFAGLVK;FMQASEDLLK;FMQASEDLLKEHYVDLK;GDFCIQVGR;GLVGEIIK;GLVGEIIKR;NIIHGSDSVESAEK;TFIAIKPDGVQR;VMLGETNPADSKPGTIR
2.53238	2.25123	2.36377	2.31001	2.30946	2.39725	0.082538	0.58787	15	15	30.867	P15559	NQO1	NAD(P)H dehydrogenase [quinone] 1	ALIVLAHSER;DPANFQYPAESVLAYK;EAAAAALK;EAAAAALKK;EGHLSPDIVAEQK;EVQDEEK;FGLSVGHHLGK;GWEVVESDLYAMNFNPIISR;IQILEGWK;IQILEGWKK;KEVQDEEK;KGWEVVESDLYAMNFNPIISR;LKDPANFQYPAESVLAYK;SIPTDNQIK;TSFNYAMK
3.54277	3.10608	3.36759	3.21659	3.16209	3.29794	0.209845	1.45179	12	12	62.081	P15586	GNS	N-acetylglucosamine-6-sulfatase	AFQNVFAPR;ASILTGK;IQEPNTFPAILR;NFNIHGTNK;QLYEFDIK;RPNVVLLLTDDQDEVLGGMTPLK;RPNVVLLLTDDQDEVLGGMTPLKK;RWQTLLSVDDLVEK;SDVLVEYQGEGR;TIDPELLGK;TQMDGMSLLPILR;WQTLLSVDDLVEK
1.27168	1.02522	1.14335	1.06635	1.07004	1.15396	0.0881074	0.781546	12	12	46.442	P15735;Q16816	PHKG2	Phosphorylase b kinase gamma catalytic chain, liver/testis isoform	ATGHEFAVK;DLKPENILLDDNMQIR;GVSSVVR;IMEVTAER;KGELFDYLTEK;LLQVDPEAR;LSPEQLEEVR;LTAEQALQHPFFER;LYGHWVK;SLLEAVSFLHANNIVHR;TLDVGPEDELPDWAAAK;VALSTHR
1.06908	0.868773	1.02708	0.972679	0.908837	0.995033	0.0785128	1.21054	12	12	59.687	P15848	ARSB	Arylsulfatase B	ATGVWGPWM;DGEEVATGYK;EAGYTTHMVGK;EYPHIVTK;GFDTYFGYLLGSEDYYSHER;GVGFVASPLLK;HSVPVYFPAQDPR;IELLHNIDPNFVDSSPCPR;LLPQLLK;TISEGSPSPR;TLWLFDIDRDPEER;WHLGMYR
3.76294	3.69914	3.67733	3.69015	3.66154	3.70037	0.0199509	0.248977	14	14	31.324	P15880	RPS2	Small ribosomal subunit protein uS5	AEDKEWMPVTK;AFVAIGDYNGHVGLGVK;ATFDAISK;ESEIIDFFLGASLKDEVLK;EVATAIR;GAIILAK;GCTATLGNFAK;GTGIVSAPVPK;KLLMMAGIDDCYTSAR;LSIVPVR;SLEEIYLFSLPIK;SPYQEFTDHLVK;TQAPAVATT;TYSYLTPDLWK
-1.59553	-1.5	-1.62058	-1.57117	-1.56595	-1.57498	-0.0341282	1.82547	5	5	53.172	P15882	CHN1	N-chimaerin	ALTLFDTDEYRPPVWK;DLPIPLITYDAYPK;GLNSEGLYR;IMDPDEQLETLHEALK;VSGFSDLIEDVK
5.71294	5.42591	5.58857	5.50602	5.48832	5.58292	0.0997607	0.883128	177	177	331.77	P15924	DSP	Desmoplakin	AEENALQQK;AEFQEEAK;AEFQEEAKR;AELIVQPELK;AEMDMVAWGVDLASVEQHINSHR;AESGPDLR;AFIGFEGVK;AITGFDDPFSGK;ALLQAILQTEDMLK;ANSSATETINK;AQIDNLTR;AQQIHSQTSQQYPLYDLDLGK;ATGSEVSQR;AVTGYNDPETGNIISLFQAMNK;DKSEEVQK;DLIDFDDR;DLIDFDDRQQIYAAEK;DMLANFR;DVLDGHLR;EEDTSGYR;EHLMLEEELR;EKWLPYEAGQR;EKYSLVEAK;EMSVQEAYK;EMSVQEAYKK;ENAAYFQFFEEAQSTEAYLK;ENDKQETWMLMELQK;ENLGWQK;ENLRQEIEK;ERENLRQEIEK;ESHRLPVDIAYK;ETQSQLETER;EYENEL…
0.728325	0.596163	0.692687	0.729828	0.626821	0.680672	0.0169061	0.186312	6	6	29.247	P15927	RPA2	Replication protein A 32 kDa subunit	ANSQPSAGR;APTNIVYK;HMSVSSIK;IDDMTAAPMDVR;QAVDFLSNEGHIYSTVDDDHFK;QWVDTDDTSSENTVVPPETYVK
-1.17965	-1.79837	-1.36669	-1.45518	-1.80651	-1.46173	0.249623	0.839288	2	2	7.2454	P15954	COX7C	Cytochrome c oxidase subunit 7C, mitochondrial	NLPFSVENK;SHYEEGPGK
0.987511	0.830723	0.822865	0.735731	1.00443	0.830408	0.017622	0.063202	5	5	24.399	P16035	TIMP2	Metalloproteinase inhibitor 2	AVSEKEVDSGNDIYGNPIKR;EVDSGNDIYGNPIKR;EYLIAGK;GAAPPKQEFLDIEDP;KEYLIAGK
2.11815	1.95728	1.99395	1.98853	1.92897	1.9731	0.0629991	0.562001	8	8	81.537	P16070	CD44	CD44 antigen	ESSETPDQFMTADETR;FAGVFHVEK;KLVINSGNGAVEDR;KPSGLNGEASK;LVINSGNGAVEDR;NLQNVDMK;SQEMVHLVNK;YGFIEGHVVIPR
1.17007	0.509003	1.01779	0.664351	0.786105	0.834892	0.280272	1.52553	8	8	25.918	P16083	NQO2	Ribosyldihydronicotinamide dehydrogenase [quinone]	ATDKDITGTLSNPEVFNYGVETHEAYK;LALLSVTTGGTAEMYTK;NVAVDELSR;SLASDITDEQK;SLASDITDEQKK;VLAPQISFAPEIASEEER;VLAPQISFAPEIASEEERK;VLIVYAHQEPK
3.24	2.63127	3.06884	2.90562	2.84021	2.93062	0.200124	1.12251	11	6	15.144	P16104;REV__Q8NB25	H2AX	Histone H2AX	AGLQFPVGR;APSGGKK;ATQASQEY;HLQLAIR;HLQLAIRNDEELNK;KATQASQEY;KGHYAER;KTSATVGPK;LLGGVTIAQGGVLPNIQAVLLPK;NDEELNK;TSATVGPK
3.79688	3.44286	3.60826	3.48383	3.48407	3.57303	0.161209	1.11597	57	57	202.16	P16144	ITGB4	Integrin beta-4	AEEVVVR;AQSQEGWGR;DVVSFEQPEFSVSR;DYIPVEGELLFQPGEAWK;DYNSLTR;DYSTLTSVSSHDSR;EAIINLATQPK;EDHYMLR;EGIITIESQDGGPFPQLGSR;ENLMASDHLDTPMLR;EPWPNSDPPFSFK;FGAHLGQPHSTTIIIRDPDELDR;FHVQLSNPK;GHMVGFKEDHYMLR;GMVEFQEGVELVDVR;GNIHLKPSFSDGLK;KQDHTIVDTVLMAPR;KVLVDNPK;LCTENLLKPDTR;LKEPWPNSDPPFSFK;LLELQEVDSLLR;LNIPNPAQTSVVVEDLLPNHSYVFR;LRPGEER;LTAGVPDTPTR;LTVPGLSENVPYK;LVFSALGPTSLR;LVNITIIK;MDFAFPGSTNSLHR;MGQNLAR;M…
3.94592	3.84078	3.89032	3.87385	3.89855	3.91012	0.00508118	0.0656057	20	17	30.375	P16152	CBR1	Carbonyl reductase [NADPH] 1	ALRDFLR;DVCTELLPLIKPQGR;EGWPSSAYGVTK;EYGGLDVLVNNAGIAFK;FHQLDIDDLQSIR;FRSETITEEELVGLMNK;FVEDTKK;GIGLAIVR;GQAAVQQLQAEGLSPR;KEYGGLDVLVNNAGIAFK;LFSGDVVLTAR;SCSPELQQK;SETITEEELVGLMNK;SPEEGAETPVYLALLPPDAEGPHGQFVSEK;SPEEGAETPVYLALLPPDAEGPHGQFVSEKR;SSGIHVALVTGGNK;TDMAGPK;TNFFGTR;VADPTPFHIQAEVTMK;VVNVSSIMSVR
2.29462	1.90097	2.15568	2.07129	2.01003	2.15166	0.127265	0.980659	16	16	44.297	P16219	ACADS	Short-chain specific acyl-CoA dehydrogenase, mitochondrial	AEGDSWVLNGTK;AWITNAWEASAAVVFASTDR;DSILGEPGMGFK;EHLFPAAQVK;ELFPIAAQVDK;ELFPIAAQVDKEHLFPAAQVK;GISAFLVPMPTPGLTLGK;GSSTANLIFEDCR;IAMQTLDMGR;ITEIYEGTSEIQR;LAASEAATAISHQAIQILGGMGYVTEMPAER;LADMALALESAR;LQVIQFK;LVIAGHLLR;MAFGAPLTK;QAWVTPFTSGDK
-1.89993	-2.12837	-2.02409	-2.19536	-2.03644	-2.01424	0.112616	0.764789	5	3	35.136	P16220	CREB1	Cyclic AMP-responsive element-binding protein 1	ILNDLSSDAPGVPR;KILNDLSSDAPGVPR;TAPTSTIAPGVVMASSPALPTQPAEEAAR;TLIEELK;VAVLENQNK
-5.84514	-4.8007	-5.5919	-4.95778	-5.05271	-5.31738	-0.573307	1.88024	3	2	122.67	P16234	PDGFRA	Platelet-derived growth factor receptor alpha	GITMLEEIK;IHLDFLK;QALMSELK
-1.79978	-1.69035	-1.79426	-1.66564	-1.77089	-1.77178	-0.0496057	0.599422	5	5	36.223	P16260	SLC25A16	Solute carrier family 25 member 16	EGFLGLYK;EGGFFGFYR;GEHSYTGIIHAFK;GLSLNYIR;MQLGTVLPEFEK
2.85896	2.68553	2.75129	2.71995	2.70273	2.73524	0.066129	0.805286	16	15	76.074	P16278	GLB1	Beta-galactosidase	AGATLDLLVENMGR;AYVAVDGIPQGVLER;FEKVPEGPIPPSTPK;GPLINSEFYTGWLDHWGQPHSTIK;GQVWINGFNLGR;HHLGDDVVLFTTDGAHK;MFEIDYSR;QHYGFVLYR;SLYPLTFIQVK;SSDPDYLAAVDK;TEAVASSLYDILAR;TVGAALDILCPSGPIK;VNYGAYINDFK;VPEGPIPPSTPK;WLGVLLPK;YISGSIHYSR
-0.900497	-0.960958	-0.949618	-0.871702	-1.03178	-0.944563	0.0168839	0.126346	12	6	59.024	P16298	PPP3CB	Serine/threonine-protein phosphatase 2B catalytic subunit beta isoform	AHEAQDAGYR;EESESVLTLK;GFSPPHR;GLTPTGMLPSGVLAGGR;HLTEYFTFK;IINEGAAILR;LFEVGGSPANTR;LTSEEVFDLDGIPR;QTLQSATVEAIEAEK;VDEEIALR;YENNVMNIR;YLFLGDYVDR
0.768787	0.863951	0.77793	0.828257	0.846805	0.82493	-0.0546805	2.42816	20	19	42.864	P16333	NCK1	SH2/SH3 adapter protein NCK1	AEEVVVVAK;APIFTSEQGEK;DSESSPNDFSVSLK;FAGNPWYYGK;FDYVAQQEQELDIK;FDYVAQQEQELDIKK;FNYMAEREDELSLIK;FSTMEELVEHYK;FSTMEELVEHYKK;GDVMDVIEKPENDPEWWK;GHEGDFLIR;GSYNGQVGWFPSNYVTEEGDSPLGDHVGSLSEK;HQAEMALNER;KAPIFTSEQGEK;KFSTMEELVEHYK;KPSVPDSASPADDSFVDPGER;LWLLDDSK;LYDLNMPAYVK;RKPSVPDSASPADDSFVDPGER;TGFVPSNYVER
-1.2855	-1.28218	-1.32712	-1.30375	-1.29571	-1.2571	-0.0150541	0.31381	9	9	89.384	P16383	GCFC2	Intron Large complex component GCFC2	AQVAGLPHR;AVEDDVFIPLYPK;ELPVPGSAEEEPPSGGGR;IHHSSESK;IPDAAFIQAAR;KDETSTSGNFSVDEK;LTLLQETHR;VLSAIINK;VQLIDWNPLK
3.30581	3.0372	3.16541	2.96058	3.06467	2.99725	0.160942	0.891361	16	12	22.58	P16401	H1-5	Histone H1.5	AAGAGAAK;AASGEAKPK;AKKPAGATPK;ALAAGGYDVEK;ATGPPVSELITK;GTGASGSFK;GTLVQTK;KAAGAGAAK;KAASGEAKPK;KALAAGGYDVEK;KATGPPVSELITK;KPAAAGVK;KPAGATPK;NGLSLAALK;NGLSLAALKK;SETAPAETATPAPVEK
2.40911	2.2846	2.32799	2.30237	2.28351	2.27795	0.0393581	0.3388	18	6	22.35	P16402	H1-3	Histone H1.3	AASGEGKPK;AGAAKPR;AGATAGK;ALAAAGYDVEK;ALAAAGYDVEKNNSR;ASGPPVSELITK;GTGASGSFK;GTLVQTK;KAASGEGKPK;KAGATAGK;KALAAAGYDVEK;KASGPPVSELITK;KPAGAAK;KVAGAATPK;SETAPLAPTIPAPAEK;SGVSLAALK;SGVSLAALKK;VAGAATPK
4.78036	4.48534	4.70471	4.56798	4.58001	4.61497	0.0861053	0.513493	19	8	21.364	P16403;Q02539;P22492	H1-2	Histone H1.2	AAGGATPK;AASGEAKPK;AGGTKPK;AKKPAAATVTK;ALAAAGYDVEK;ALAAAGYDVEKNNSR;ASGPPVSELITK;GTGASGSFK;GTLVQTK;KAAGGATPK;KAASGEAKPK;KALAAAGYDVEK;KASGPPVSELITK;KPAAATVTK;KPVGAAK;SETAPAAPAAAPPAEK;SETAPAAPAAAPPAEKAPVK;SGVSLAALK;SGVSLAALKK
3.02502	2.73872	2.91697	2.82717	2.79004	2.88857	0.116084	1.16782	36	36	76.689	P16435	POR	NADPH--cytochrome P450 reductase	AKEPAGENGGR;ALVPMFVR;ATTPVIMVGPGTGVAPFIGFIQER;DGALTQLNVAFSR;DVQNTFYDIVAELGAMEHAQAVDYIK;EELAQFHR;EEVPEFTK;ESSFVEK;FAVFGLGNK;GVATNWLR;HLMHLELDISDSK;ILGADLDVVMSLNNLDEESNK;ILGADLDVVMSLNNLDEESNKK;IQTLTSSVR;IRYESGDHVAVYPANDSALVNQLGK;KEEVPEFTK;KKEEVPEFTK;LEQLGAQR;MASSSGEGK;NIIVFYGSQTGTAEEFANR;NPFLAAVTTNR;QDREHLWK;QYELVVHTDIDAAK;RLEQLGAQR;RSDEDYLYREELAQFHR;SDEDYLYR;SDEDYLYREELAQFHR;SYENQKPPFDAK;TALTYYLDI…
-0.928808	-1.35198	-1.10175	-1.14817	-1.28583	-1.18539	0.162755	1.08307	6	6	21.646	P16455	MGMT	Methylated-DNA--protein-cysteine methyltransferase	AVGGAMR;EWLLAHEGHR;FGEVISYQQLAALAGNPK;GAGATSGSPPAGR;LGKPGLGGSSGLAGAWLK;TTLDSPLGK
-0.673687	-0.440834	-0.685582	-0.549185	-0.365745	-0.571262	-0.203193	1.39485	7	4	37.221	P16520	GNB3	Guanine nucleotide-binding protein G(I)/G(S)/G(T) subunit beta-3	GEMEQLRQEAEQLKK;IYAMHWATDSK;LIVWDSYTTNK;LLVSASQDGK;QEAEQLK;VGILSGHDNR;VHAIPLR
-3.27773	-3.04455	-3.25707	-3.24765	-3.07755	-3.24671	-0.0971079	0.737297	6	6	94.637	P16591	FER	Tyrosine-protein kinase Fer	ESHGKPGEYVLSVYSDGQR;GIFDEYSQITSLVTEEIVNVHK;GNFGEVYK;HSIAGIIR;KSDIVLLLSQK;SGVVLLNPIPK
3.95354	3.84324	3.83004	3.8729	3.80807	3.85835	0.0271117	0.239495	36	36	114.76	P16615;O14983;Q93084	ATP2A2	Sarcoplasmic/endoplasmic reticulum calcium ATPase 2	AEIGIAMGSGTAVAK;AIYNNMK;AKDIVPGDIVEIAVGDK;AKDIVPGDIVEIAVGDKVPADIR;AMGVVVATGVNTEIGK;AVNQDKK;DIVPGDIVEIAVGDK;DIVPGDIVEIAVGDKVPADIR;EEMHLEDSANFIK;EFDELNPSAQR;EFTLEFSR;EWGSGSDTLR;EYEPEMGK;GAIYYFK;GAPEGVIDR;HTDPVPDPR;IEVASSVK;IGIFGQDEDVTSK;IRDEMVATEQER;ISLPVILMDETLK;KAEIGIAMGSGTAVAK;KEFTLEFSR;LDEFGEQLSK;MENAHTK;MNVFDTELK;NAENAIEALK;NAENAIEALKEYEPEMGK;NMLFSGTNIAAGK;REEMHLEDSANFIK;TASEMVLADDNFSTIVAAVEEG…
1.03012	0.727654	0.924811	0.858891	0.783927	0.895721	0.114904	1.13306	10	10	46.374	P16930	FAH	Fumarylacetoacetase	AHEHIFGMVLMNDWSAR;ASSVVVSGTPIR;DKENALMPNWLHLPVGYHGR;GTKPIDLGNGQTR;HLFTGPVLSK;LRDDTELR;QHATNVGIMFR;SFIPVAEDSDFPIHNLPYGVFSTR;VFLQNLLSVSQAR;WEYVPLGPFLGK
2.74197	2.59156	2.66664	2.52757	2.67367	2.64946	0.083381	0.76219	20	16	17.302	P16949	STMN1	Stathmin	ASGQAFELILSPR;ASSDIQVK;DKHIEEVR;DKHIEEVRK;DLSLEEIQK;DLSLEEIQKK;EAQMAAK;EHEKEVLQK;EKDKHIEEVR;ESKDPADETEAD;ESVPEFPLSPPK;HIEEVRK;KDLSLEEIQK;KLEAAEER;KSHEAEVLK;MASSDIQVK;NKESKDPADETEAD;REHEKEVLQK;SHEAEVLK;SKESVPEFPLSPPK
0.133423	0.341265	0.198836	0.299644	0.291625	0.211796	-0.0911802	1.21156	13	8	40.089	P16989	YBX3	Y-box-binding protein 3	AGEAPTENPAPPTQQSSAE;DGVPEGAQLQGPVHR;EDVFVHQTAIK;EDVFVHQTAIKK;GAEAANVTGPDGVPVEGSR;IQAGEIGEMK;IQAGEIGEMKDGVPEGAQLQGPVHR;NDTKEDVFVHQTAIK;NGYGFINR;SEAGEATTTTTTTLPQAPTEAAAAAPQDPAPK;SVGDGETVEFDVVEGEK;SVGDGETVEFDVVEGEKGAEAANVTGPDGVPVEGSR;VLPHPNR
-4.5111	-4.61316	-4.58524	-4.50296	-4.57771	-4.61898	0.010609	0.0925615	2	2	63.629	P17029	ZKSCAN1	Zinc finger protein with KRAB and SCAN domains 1	AETSEDSASR;ASEYSPASLDAFGAFLK
1.95361	1.56732	1.8161	1.7135	1.70724	1.83152	0.112979	0.869503	5	5	46.564	P17050	NAGA	Alpha-N-acetylgalactosaminidase	INQDPLGIQGR;MAQDGWR;SLIEVYMRPLSNK;TISAQNMDILQNPLMIK;VVQDAQTFAEWK
1.6492	0.901293	1.44134	1.17109	1.07728	1.28428	0.31407	1.45419	10	1	71.027	P17066;P48741	HSPA6	Heat shock 70 kDa protein 6	ATAGDTHLGGEDFDNR;DNNLLGR;IINEPTAAAIAYGLDR;ITITNDK;ITITNDKGR;LLQDFFNGK;LLQDFFNGKELNK;STLEPVEK;TTPSYVAFTDTER;VEILANDQGNR
2.0995	1.65114	1.86682	1.7287	1.63039	1.81638	0.196575	0.8651	9	8	11.676	P17096	HMGA1	High mobility group protein HMG-I/HMG-Y	EPSEVPTPK;KLEKEEEEGISQESSEEEQ;KQPPVSPGTALVGSQK;KTTTTPGR;QEKDGTEK;QPPVSPGTALVGSQK;SSQPLASK;TTTTPGR
0.02565	-0.0618458	-0.116168	-0.0893154	-0.10463	-0.121304	0.0352764	0.293888	6	6	21.541	P17152	TMEM11	Transmembrane protein 11, mitochondrial	IGDETAR;IYELYAV;LGPGSSGGSAR;LPLHTLTSSTPVVLVR;YIVIEPTR;YQVEYDAYK
3.55646	3.26188	3.39319	3.36827	3.312	3.40714	0.0849959	0.626074	26	26	46.247	P17174	GOT1	Aspartate aminotransferase, cytoplasmic	APPSVFAEVPQAQPVLVFK;EPESILQVLSQMEK;HIYLLPSGR;IANDNSLNHEYLPILGLAEFR;IGADFLAR;INVSGLTTK;ITWSNPPAQGAR;IVASTLSNPELFEEWTGNVK;KVNLGVGAYR;LALGDDSPALK;LTADFREDPDPR;LTADFREDPDPRK;MAPPSVFAEVPQAQPVLVFK;NFGLYNER;NLDYVATSIHEAVTK;NTPVYVSSPTWENHNAVFSAAGFK;QIASVMK;QVEYLVNEK;RVGGVQSLGGTGALR;TDDCHPWVLPVVK;TPGTWNHITDQIGMFSFTGLNPK;VGGVQSLGGTGALR;VGNLTVVGK;VGNLTVVGKEPESILQVLSQMEK;VNLGVGAYR;YWDAEKR
0.450068	0.537903	0.450601	0.530094	0.373057	0.434093	0.0104396	0.0799417	11	9	76.749	P17252	PRKCA	Protein kinase C alpha type	ADVFPGNDSTASQDVANR;AEVADEK;DLKLDNVMLDSEGHIK;EIQPPFKPK;GAENFDK;GAENFDKFFTR;GTEELYAIK;LDNVMLDSEGHIK;LLNQEEGEYYNVPIPEGDEEGNMELR;STLNPQWNESFTFK;VISPSEDR
-1.36245	-1.28352	-1.32613	-1.35447	-1.2188	-1.37071	-0.0299848	0.239729	4	3	35.879	P17275;P05412	JUNB	Transcription factor JunB	AENAGLSSTAGLLR;ALDDLHK;EQVAQLK;GASTFKEEPQTVPEAR
-4.07916	-4.09675	-4.11093	-4.15437	-4.18328	-4.0861	0.0364148	0.500651	6	6	129.29	P17301	ITGA2	Integrin alpha-2	EGILGQHQFLEGPEGIENTR;IPLLYDAEIHLTR;QIPAAQEQPFIVSNQNK;VDISLENPGTSPALEAYSETAK;VFSIPFHK;VYLFTIK
1.78146	1.76167	1.7197	1.75302	1.70791	1.75519	-0.00125821	0.0154552	13	13	43.008	P17302	GJA1	Gap junction alpha-1 protein	FKYGIEEHGK;GDWSALGK;GKSDPYHATSGALSPAK;ILLLGTAVESAWGDEQSAFR;KLAAGHELQPLAIVDQRPSSR;LAAGHELQPLAIVDQRPSSR;LLDKVQAYSTAGGK;QASEQNWANYSAEQNR;SDPYHATSGALSPAK;SFPISHVR;VAQTDGVNVDMHLK;VQAYSTAGGK;YGIEEHGK
-4.46522	-3.97618	-3.97164	-3.91019	-3.92031	-4.05344	-0.216305	0.627225	3	3	59.807	P17342	NPR3	Atrial natriuretic peptide receptor 3	AALVYSDDKLER;ALFSLVDR;SIMLVAHR
-1.73686	-1.81456	-1.90665	-1.87959	-1.86912	-1.88172	0.0165501	0.0946956	5	5	69.935	P17405	SMPD1	Sphingomyelin phosphodiesterase;Sphingomyelin phosphodiesterase, processed form	ALTTVTALVR;AWEPWLPAEALR;ETYGLPNTLPTAWHNLVYR;IGGFYALSPYPGLR;WLYEAMAK
2.43035	2.32122	2.31192	2.28771	2.34163	2.34315	0.0323391	0.320096	29	29	89.405	P17480	UBTF	Nucleolar transcription factor 1	AEEIWQQSVIGDYLAR;AMEMTWNNMEK;APPAATNSSK;DVPSTER;DYEVELLR;FLESLPEEEQQR;FREDHPDLIQNAK;GKLPESPK;HPELNISEEGITK;KAAEDQK;KDYEVELLR;KKDYEVELLR;KLAEEQQK;KPAQEGGK;KPLTPYFR;LAEEQQK;LHPEMSNLDLTK;MLNINKK;MWNDLSEK;QATSPASK;QLQEERPELSESELTR;RAEEIWQQSVIGDYLAR;RPVSAMFIFSEEK;SLSPQDR;TLTELILDAQEHVK;TPQQLWYTHEK;TTESHMDWEK;VHLDLWVK;WVEISNEVR
1.17821	1.45942	1.25216	1.38547	1.39294	1.32815	-0.151502	2.15888	12	10	47.504	P17540	CKMT2	Creatine kinase S-type, mitochondrial	EVENVAITALEGLK;GIWHNYDK;GTGGVDTAAVADVYDISNIDR;HTTDLDASK;ITQGQFDEHYVLSSR;LFPPSADYPDLRK;LGYILTCPSNLGTGLR;LSEMTEQDQQR;REVENVAITALEGLK;RGTGGVDTAAVADVYDISNIDR;TFLIWINEEDHTR;VPPPLPQFGK
0.196741	0.435452	0.225305	0.411528	0.402255	0.321413	-0.166297	2.29611	6	6	16.402	P17568	NDUFB7	NADH dehydrogenase [ubiquinone] 1 beta subcomplex subunit 7	DSFPNFLACK;EMVATQQEMMDAQLR;GQGPGEVDPK;KAAELAK;RYLGDASVEPDPLQMPTFPPDYGFPER;YLGDASVEPDPLQMPTFPPDYGFPER
1.86224	1.71828	1.78495	1.7423	1.73116	1.81879	0.045859	0.531929	21	8	40.589	P17612	PRKACA	cAMP-dependent protein kinase catalytic subunit alpha	AKEDFLK;DNSNLYMVMEYVPGGEMFSHLR;ETGNHYAMK;FKGPGDTSNFDDYEEEEIR;FPSHFSSDLK;FPSHFSSDLKDLLR;FSEPHAR;GSEQESVK;HKETGNHYAMK;ILQAVNFPFLVK;KGSEQESVK;KVEAPFIPK;KWESPAQNTAHLDQFER;LKQIEHTLNEK;NLLQVDLTK;NLLQVDLTKR;QIEHTLNEK;QIEHTLNEKR;TLGTGSFGR;VEAPFIPK;WESPAQNTAHLDQFER
2.31672	1.86688	2.08642	1.92375	1.97853	2.05984	0.166263	0.848622	17	17	60.724	P17643	TYRP1	5,6-dihydroxyindole-2-carboxylic acid oxidase	DDREVWPLR;DMQEMLQEPSFSLPYWNFATGK;KTFLGVGQESFGEVDFSHEGPAFLTWHR;LQNPNQSVV;NLLDLSK;NLLDLSKEEK;NPAGNVARPMVQR;NTVEGYSDPTGK;QCATVEALR;RNLLDLSK;RNLLDLSKEEK;RYNADISTFPLENAPIGHNR;SMDEANQPLLTDQYQCYAEEYEK;SNFDSTLISPNSVFSQWR;TFLGVGQESFGEVDFSHEGPAFLTWHR;TTHPLFVIATR;YNADISTFPLENAPIGHNR
3.27768	3.13823	3.1716	3.18836	3.10733	3.16507	0.0558993	0.598398	29	29	79.994	P17655	CAPN2	Calpain-2 catalytic subunit	ADYQAVDDEIEANLEEFDISEDDIDDGFRR;ALEEAGFK;DGELLFVHSAEGSEFWSALLEK;EFYILWTK;ELGPYSSK;FADDQLIIDFDNFVR;FKLPPGEYILVPSTFEPNK;GHAYSVTGAEEVESNGSLQK;GSLLGCSIDITSAADSEAITFQK;IMVDMLDSDGSGK;KADYQAVDDEIEANLEEFDISEDDIDDGFRR;KALEEAGFK;KMGEDMHTIGFGIYEVPEELSGQTNIHLSK;KPPPNLFK;LEEEDEDEEDGESGCTFLVGLIQK;LEICNLTPDTLTSDTYK;LEICNLTPDTLTSDTYKK;LFAQLAGEDAEISAFELQTILR;LPPGEYILVPSTFEPNK;LPPGEYILVPSTFEPNKDGDFCIR;MGEDMHTIGFGIY…
-2.26597	-2.46019	-2.41487	-2.44802	-2.43384	-2.39185	0.0432717	0.2827	2	2	36.105	P17676	CEBPB	CCAAT/enhancer-binding protein beta	NLETQHK;VLELTAENER
0.0245953	-0.0685349	0.029952	-0.131266	0.0396528	0.0481319	0.00794093	0.0399711	5	5	24.802	P17677	GAP43	Neuromodulin	AEDAPAKEEPK;AGSAETESATK;ASTDNSPSSK;ATAQPPTETGESSQAEENIEAVDETKPK;KGEGDAATEQAAPQAPASSEEK
-0.790127	-1.59834	-0.995709	-0.88007	-1.66373	-1.07498	0.350763	0.644531	2	1	38.224	P17693	HLA-G	HLA class I histocompatibility antigen, alpha chain G;Soluble HLA class I histocompatibility antigen, alpha chain G	DYLALNEDLR;WAAVVVPSGEEQR
-0.563417	-0.505569	-0.585465	-0.577841	-0.605193	-0.55093	0.0108954	0.231871	8	8	48.473	P17706	PTPN2	Tyrosine-protein phosphatase non-receptor type 2	ELSKEDLSPAFDHSPNK;ETGFSVK;FSYMAIIEGAK;GDDINIK;LLSEDVK;LQNAENDYINASLVDIEEAQR;NESHDYPHR;SYYTVHLLQLENINSGETR
1.39675	1.42663	1.27878	1.37246	1.34308	1.27686	-0.0189915	0.136639	17	14	66.69	P17812	CTPS1	CTP synthase 1	ALEHSALAINHK;DNNLTTGK;FEVNPVWK;FSDSYASVIK;FVGQDVEGER;GIIASSVGTILK;IYQYVINK;KGDYLGK;KLYGDADYLEER;LSHYLQK;LYGDADYLEER;RLDLPIER;TKPTQNSVR;TVQVVPHITDAIQEWVMR;YHEAWQK;YIDSADLEPITSQEEPVR;YILVTGGVISGIGK
4.26209	4.01405	4.13994	4.0806	4.05979	4.10381	0.089407	0.863772	38	29	69.147	P17844	DDX5	Probable ATP-dependent RNA helicase DDX5	AGPLSGK;APILIATDVASR;DGWPAMGIHGDK;DRENYDR;DRYSAGK;DWVLNEFK;EANQAINPK;FGNPGEK;FVINYDYPNSSEDYIHR;GDGPICLVLAPTR;GGFNTFR;GLDVEDVK;GVEICIATPGR;GYSSLLK;IVDQIRPDR;KFGNPGEK;KIVDQIRPDR;KWNLDELPK;LLQLVEDR;LMEEIMSEK;LMEEIMSEKENK;MLDMGFEPQIR;NFYQEHPDLAR;QLAEDFLK;QNFTEPTAIQAQGWPVALSGLDMVGVAQTGSGK;QTLMWSATWPK;QVSDLISVLR;RTAQEVETYR;STCIYGGAPK;TAQEVETYR;TAQEVETYRR;TGTAYTFFTPNNIK;TIVFVETK;TIVFVETKR;TLSYLLPAIVHINH…
4.41387	4.3097	4.34523	4.35379	4.38176	4.37923	-0.0179234	0.204861	34	27	85.018	P17858	PFKL	ATP-dependent 6-phosphofructokinase, liver type	AAVDLEK;AIGVLTSGGDAQGMNAAVR;AMDDKRFDEATQLR;AMLWLSEK;AVAFSPVTELK;AVAFSPVTELKK;DTDFEHR;EQWWLSLR;FDEATQLR;GGSFENNWNIYK;GGSMLGTK;GGTPSAFDR;GQLESIVENIR;GQVQEVGWHDVAGWLGR;IKQSASGTK;IMEVIDAITTTAQSHQR;ISETTAR;ISMAAYVSGELEHVTR;KAVAFSPVTELK;KDTDFEHR;LNIIIIAEGAIDR;MGIYVGAK;NGKPISSSYVK;QSASGTK;RFDEATQLR;SEWGSLLEELVAEGK;SNFSLAILNVGAPAAGMNAAVR;TFVLEVMGR;TGISHGHTVYVVHDGFEGLAK;TNVLGHLQQGGAPTPFDR;VFANAPDSACVIGLK;…
2.04409	1.32057	1.83858	1.36527	1.54727	1.72096	0.388963	1.51267	5	5	20.838	P17900	GM2A	Ganglioside GM2 activator;Ganglioside GM2 activator isoform short	EGTYSLPK;EVAGLWIK;IESVLSSSGK;SEFVVPDLELPSWLTTGNYR;VDLVLEK
1.97013	1.17616	1.7579	1.40993	1.42406	1.51002	0.348256	1.64557	10	10	26.152	P17931	LGALS3	Galectin-3	GNDVAFHFNPR;IALDFQR;IQVLVEPDHFK;KLNEISK;LDNNWGR;LDNNWGREER;LGISGDIDLTSASYTMI;MLITILGTVKPNANR;QSVFPFESGKPFK;VAVNDAHLLQYNHR
4.33745	4.07262	4.18201	4.11893	4.14842	4.16538	0.0837949	0.672095	31	31	49.203	P17980	PSMC3	26S proteasome regulatory subunit 6A	ACAAQTK;AGDREVQR;AMEVDERPTEQYSDIGGLDK;APSIIFIDELDAIGTK;APSIIFIDELDAIGTKR;DAFALAK;DSYLILETLPTEYDSR;EKAPSIIFIDELDAIGTK;EKAPSIIFIDELDAIGTKR;EKFENLGIQPPK;FENLGIQPPK;GATELTHEDYMEGILEVQAK;GVLMYGPPGTGK;IKENSEK;IMQIHSR;KIEFPMPNEEAR;KMNVSPDVNYEELAR;LAGPQLVQMFIGDGAK;LKPGDLVGVNK;LLDSEIK;MNLLPNIESPVTR;MNVSPDVNYEELAR;MSTEEIIQR;QIQELVEAIVLPMNHK;QTYFLPVIGLVDAEK;TMLELLNQLDGFQPNTQVK;VDILDPALLR;VIAATNR;VIAATNRVDIL…
3.42034	3.37852	3.34124	3.28498	3.20078	3.53269	0.000511169	0.00151575	28	28	60.343	P17987	TCP1	T-complex protein 1 subunit alpha	AFHNEAQVNPER;AFHNEAQVNPERK;DCLINAAK;DDKHGSYEDAVHSGALND;EQLAIAEFAR;EVGDGTTSVVIIAAELLK;FATEAAITILR;GANDFMCDEMER;HGSYEDAVHSGALND;ICDDELILIK;IHPTSVISGYR;LGVQVVITDPEK;LGVQVVITDPEKLDQIR;LLEVEHPAAK;MEGPLSVFGDR;MLVDDIGDVTITNDGATILK;NADELVK;QAGVFEPTIVK;SLHDALCVVK;SLLVIPNTLAVNAAQDSTDLVAK;SQNVMAAASIANIVK;SSLGPVGLDK;STGETIR;TSASIILR;WIGLDLSNGKPR;YFVEAGAMAVR;YINENLIVNTDELGR;YPVNSVNILK
1.77501	1.75637	1.72706	1.7153	1.70855	1.72879	0.0368652	1.12276	20	20	49.966	P18031	PTPN1	Tyrosine-protein phosphatase non-receptor type 1	DVSPFDHSR;EFEQIDK;EFFPNHQWVK;ELSHEDLEPPPEHIPPPPRPPK;EMIFEDTNLK;FIMGDSSVQDQWK;FSYLAVIEGAK;GAQAASPAK;GSPLNAAPYGIESMSQDTEVR;GVVMLNR;IKLHQEDNDYINASLIK;ILEPHNGK;LHQEDNDYINASLIK;LTLISEDIK;MEMEKEFEQIDK;MGLIQTADQLR;QLELENLTTQETR;SGSWAAIYQDIR;VVGGSLR;YRDVSPFDHSR
-0.118256	-0.211912	-0.248191	-0.252478	-0.229949	-0.216135	0.0494525	0.56332	14	14	86.908	P18074	ERCC2	General transcription and DNA repair factor IIH helicase subunit XPD	AYPLEVTK;ENDFLTFDAMR;ETDAHLANPVLPDEVLQEAVPGSIR;EVPLPAGIYNLDDLK;FYEEFDAHGR;GHGVLEMPSGTGK;GNDQVAISSK;LLFIETQDGAETSVALEK;LLNFYEK;QEGEKLPFLGLALSSR;TAEHFLGFLR;VIEELRK;VQHVVQESPPAFLSGLAQR;VSEGIDFVHHYGR
-0.290453	-0.520641	-0.422299	-0.446108	-0.512959	-0.444147	0.0847397	0.753771	5	5	49.312	P18075;P22003	BMP7	Bone morphogenetic protein 7	ATEVHFR;ESDLFLLDSR;IPEGEAVTAAEFR;ISVYQVLQEHLGR;KHELYVSFR
2.12647	1.80701	2.04205	1.92366	1.89111	1.97935	0.132688	1.50391	10	10	12.538	P18077	RPL35A	Large ribosomal subunit protein eL33	AHGNSGMVR;AIFAGYK;AIFAGYKR;DETEFYLGK;DETEFYLGKR;EHTALLK;IEGVYAR;IEGVYARDETEFYLGK;NNTVTPGGKPNK;VMLYPSR
-0.0218525	-0.238594	-0.11896	-0.191246	-0.223619	-0.200647	0.109315	1.31078	11	11	88.053	P18084	ITGB5	Integrin beta-5	DALHLLVFTTDDVPHIALDGK;GSGSAGWDVIQMTPQEIAVNLRPGDK;HLLPLTDR;HLLPLTDRVDSFNEEVRK;HTEHVFALRPVGFR;KPISTHTVDFTFNK;LAENNINLIFAVTK;LGFGSFVDKDISPFSYTAPR;NHYMLYK;SLPLSSK;YEMASNPLYR
2.16965	1.75126	2.0176	1.92042	1.7505	1.92497	0.202069	1.23424	10	5	20.511	P18085	ARF4	ADP-ribosylation factor 4	DAVLLLFANK;HYFQNTQGLIFVVDSNDR;HYFQNTQGLIFVVDSNDRER;ILMVGLDAAGK;IQEVADELQK;LGEIVTTIPTIGFNVETVEYK;LGLQSLR;MLLVDELR;QDLPNAMAISEMTDK;QMRILMVGLDAAGK
3.5978	3.29853	3.467	3.37578	3.35795	3.44185	0.119497	1.11954	21	21	29.225	P18124	RPL7	Large ribosomal subunit protein uL30	AGNFYVPAEPK;ASINMLR;EANNFLWPFK;EVPAVPETLK;EVPAVPETLKK;FKEANNFLWPFK;GINGVSPK;IALTDNALIAR;IVEPYIAWGYPNLK;KAGNFYVPAEPK;KKEVPAVPETLK;KTTHFVEGGDAGNR;KTTHFVEGGDAGNREDQINR;KVLQLLR;MEGVEEK;QIFNGTFVK;RNFAELK;SVNELIYK;SVNELIYKR;TTHFVEGGDAGNR;TTHFVEGGDAGNREDQINR
6.13864	5.91899	6.01806	5.98306	5.96569	6.02085	0.068517	0.724036	93	93	123.8	P18206	VCL	Vinculin	AAAVGTANK;AAAVGTANKSTVEGIQASVK;AANFENHSGK;AASDELSK;AAVHLEGK;AAVHLEGKIEQAQR;AGEVINQPMMMAAR;AIPDLTAPVAAVQAAVSNLVR;ALASIDSK;ALASIDSKLNQAK;ALASQLQDSLK;ALASQLQDSLKDLK;ALIQCAK;AQQVSQGLDVLTAK;AQQVSQGLDVLTAKVENAAR;ASDEVTR;AVAGNISDPGLQK;AVANSRPAK;DMPPAFIK;DPSASPGDAGEQAIR;DTEAMKR;DYLIDGSR;EAEAASIK;EAFQPQEPDFPPPPPDLEQLR;EEVFDER;EILGTCK;ELLPVLISAMK;ELTPQVVSAAR;ERDDILR;ETVQTTEDQILK;ETVQTTEDQILKR;EVENSEDPK;EVE…
-0.66054	-0.52273	-0.555381	-0.579214	-0.472449	-0.536856	-0.0731901	0.77074	14	13	90.718	P18433	PTPRA	Receptor-type tyrosine-protein phosphatase alpha	AEGILDVFQTVK;DLLVTNTR;EETVNDFWR;FIAAQGPK;GEENTDYVNASFIDGYR;LITQFHFTSWPDFGVPFTPIGMLK;QFHFHGWPEVGIPSDGK;RMADDNK;TEDVEPQSVPLLAR;VKAEGILDVFQTVK;VLQIIPYEFNR;VSVEDVTVLVDYTVR;YPPLPVDKLEEEINRR;YVNILPYDHSR
-1.07934	-1.53098	-1.22353	-1.36691	-1.39581	-1.27291	0.185358	1.51862	4	4	33.898	P18440	NAT1	Arylamine N-acetyltransferase 1	EQYIPNEEFLHSDLLEDSK;LDLETLTDILQHQIR;NKLDLETLTDILQHQIR;TLSEEEIEK
1.80937	1.63395	1.70386	1.63371	1.63064	1.64125	0.10721	1.47285	29	29	263.83	P18583	SON	Protein SON	AGIEGPLLASDVGR;AGVPLPPNLKPAPPPTIEEK;AQLLEIAK;ATNIEQIFR;DIHLDLPSNNNLVSK;DTEEPLPVK;EADSVYGEWVPVEK;EGNKEPILVDFK;EIQQELSSGR;ESDQTLAALLSPK;ETLPDSGFSANIEDINEADLVRPLLPK;FDSEPSAVALELPTR;GIEFTTASTLSLVNK;GINLSSGDQNLAPEIGMQEIALHSGEEPHAEEHLK;IEEVLSGVLDTELR;ILPTSETK;IMLVEPPVAK;LAQDPYR;LGHDAYR;LGHDPYR;LGQDPYR;LPEQPVDVPSEIADSSMTRPQELPELPK;LTDLDKAQLLEIAK;LTPDPYR;RLTDLDK;SHDDGNIDLESDSFLK;SLPNEEIVQK;SMMSAYER;SQVTL…
-0.641693	-0.6861	-0.727809	-0.747089	-0.675431	-0.718893	0.0188465	0.215397	10	10	43.239	P18615	NELFE	Negative elongation factor E	ELGPDGEEAEGPGAGDGPPR;GAFSPFGNIIDLSMDPPR;GPVPTFQPFQR;KGNTLYVYGEDMTPTLLR;KQPMLDAATGK;LKDPEKGPVPTFQPFQR;MLVIPPGLSEEEEALQK;SGAISAIK;SLSEQPVMDTATATEQAK;TQIVYSDDVYKENLVDGF
2.60316	2.57058	2.56656	2.55296	2.63513	2.54717	-0.0200214	0.190542	11	11	21.397	P18621	RPL17	Large ribosomal subunit protein uL22	EQIVPKPEEEVAQK;EQIVPKPEEEVAQKK;GLDVDSLVIEHIQVNK;INPYMSSPCHIEMILTEK;KSAEFLLHMLK;NAESNAELK;QWGWTQGR;SAEFLLHMLK;YLKDVTLQK;YNGGVGR;YSLDPENPTK
[truncated: 5,401 more rows]

## Sheet: DEP (PRPF31- vs GFP-AAV)
Differentially expressed proteins between PRPF31.AAV and GFP.AAV RPE cells (padj-value < 0.05; log2 fold change (LFC) ≤ -0.26 for downregulated proteins; upregulated proteins LFC ≥ 0.26))
[truncated: 231 more rows]

[truncated: 2 more sheets: GOBP (PRPF31- vs GFP-AAV), GOCC (PRPF31- vs GFP-AAV)]
