# Supplementary material for: Cell-autonomous restoration of splicing homeostasis and RP11 phenotype in patient-derived RPE and retinal organoids by PRPF31.AAV gene therapy
Source: bioRxiv preprint, doi:10.64898/2026.04.14.718379, version 1 (2026-04-16)
Supplement: Table S4 [file 718379_file06.xlsx]

## Sheet: TMT-based RO proteomics
Table S4: TMT-based proteomics of PRPF31.AAV and GFP.AAV RPE cells
PRPF31-1	PRPF31-2	PRPF31-3	GFP1	GFP2	GFP3	Log2 fold change PRPF31/GFP	-Log10 p-value	Peptides	Unique peptides	Mol. weight [kDa]	Protein IDs	Gene names	Protein names		Peptide sequences
-2.32745	-2.39368	-2.29206	-2.34798	-2.42542	-2.37937	0.0465314	0.552123	5	1	20.434	A0A024RBG1	NUDT4B	Diphosphoinositol polyphosphate phosphohydrolase NUDT4B		EVYEEAGVK;EWFKVEDAIK;LLGIFEQNQDR;SEQEDEVLLVSSSR;YPDQWIVPGGGMEPEEEPGGAAVR
2.24249	2.26435	2.24508	2.18241	2.41053	2.08892	0.0233583	0.0865599	11	11	28.17	P0DPI2;A0A0B4J2D5	GATD3;GATD3B	Glutamine amidotransferase-like class 1 domain-containing protein 3, mitochondrial;Putative glutamine amidotransferase-like class 1 domain-containing protein 3B, mitochondrial		EVVEAHVDQK;GGAEVQIFAPDVPQMHVIDHTK;GQPSEGESR;GVEVTVGHEQEEGGK;GVEVTVGHEQEEGGKWPYAGTAEAIK;ITDLANLSAANHDAAIFPGGFGAAK;KVLELTGK;NLSTFAVDGK;NVLTESAR;VLELTGK;WPYAGTAEAIK
-3.74183	-3.85855	-3.94049	-3.87211	-3.78157	-3.70568	-0.0605049	0.332099	1	1	29.887	P0DPI3;A0A0U1RRI6;A0A0U1RR11	CENPVL2;CENPVL3;CENPVL1	Centromere protein V-like protein 2;Centromere protein V-like protein 3;Centromere protein V-like protein 1		HFLVPASR
-2.34245	-2.94486	-3.22017	-2.96182	-2.68154	-3.1331	0.0896613	0.111747	2	2	21.509	A0A1B0GVS7	MDFIC2	MyoD family inhibitor domain-containing protein 2		MSETELEKIK;SETELEK
-0.421703	-1.21238	-1.44069	-1.36606	-1.48391	-1.09527	0.290156	0.368326	2	2	217.77	A0A494C071	PWWP4	PWWP domain-containing DNA repair factor 4		AHTSLAPTPGALR;SVSNTDK
-0.364344	-0.363527	-0.477207	-0.413179	-0.323701	-0.460793	-0.00246843	0.0148252	11	11	151.64	Q6ZSZ5;A0A590UK10	ARHGEF18	Rho guanine nucleotide exchange factor 18		ALQEELQFSSK;DIISQVDAK;DQLIAQSLLEK;GGDPSETLQGELILK;GNLLLEQER;GPPNSPDLK;IIQNTEAGTEDYEDLTQALNLIK;LLLQQNK;LPTVLESELVQR;LSDSDIPGSSEESPQVVEAPGTESDPR;SDVPIQLLSATNQFQR
-1.96191	-1.85303	-1.79964	-1.89861	-1.47053	-1.90164	-0.114601	0.309789	2	2	17.781	Q16540;A0AAG2SUK6	MRPL23	Large ribosomal subunit protein uL23m		GGVPSWFGL;NYLEGIYNVPVAAVR
-4.12008	-4.04455	-3.97046	-3.98683	-3.97963	-3.9643	-0.0681105	0.71198	1	1	68.028	O43272;A0AAG2SXN7	PRODH	Proline dehydrogenase 1, mitochondrial		LEVAVLQESVAK
-0.942228	-0.896593	-0.957357	-1.0507	-0.803376	-1.13099	0.0629638	0.248653	13	13	77.672	O15226;A0AAG2UWQ9	NKRF	NF-kappa-B-repressing factor		ATELAVK;DASGQPIFNASAK;EDNIGNQLLR;EGLGLDVER;EIPPADIPK;FEPVHFVASSSK;HAAADEALK;KQIHQIAQK;RKEDLLDQLK;SAEEAYK;SHGVGHDR;VILESEVIAEAVGVK;YEAAGEAVK
2.76477	2.84382	2.86736	2.80383	2.84495	2.60422	0.0743176	0.388858	23	23	153.76	A0AAG2UXZ5;P39060	COL18A1	Collagen alpha-1(XVIII) chain;Endostatin;Non-collagenous domain 1		AAVPIVNLK;ADDILASPPR;AVGLAGTFR;DELLFPSWEALFSGSEGPLKPGAR;DFQPVLHLVALNSPLSGGMR;EETGAALKPR;ELLREETGAALKPR;FQGVIAELK;GDKGDPGVGER;GDPGVGER;GEPGGGGFFGSSLPGPPGPPGPR;GLELEPGAGLFVAQAGGADPDK;GLELEPGAGLFVAQAGGADPDKFQGVIAELK;GTDNEVAALQPPVVQLHDSNPYPR;HPTWPQK;IFSFDGK;IFSFDGKDVLR;KVQLEAR;LPAPPPVTTPPLAGGSSTEDSR;LQDLYSIVR;LSGVQDGHQDISLLYTEPGAGQTHTAASFR;TEAPSATGQASSLLGGR;YHFPSLFFR
-0.746267	-0.711843	-0.725266	-0.801262	-0.488116	-0.762386	-0.0438706	0.167024	10	10	64.177	A0AVF1	IFT56	Intraflagellar transport protein 56		AAEAELK;AATGNTSEGEEAFLLIQSEK;AFDVLER;ALEEYENATK;DFTGAITLLEFK;DLEPTTPQEYILK;EVLHLLR;GGEGALQVLPPLVDVIPEAR;LEELLSK;LLFHLAHK
2.92903	2.90692	3.04339	2.91571	3.10044	2.85828	0.00163937	0.00637202	31	31	117.97	A0AVT1	UBA6	Ubiquitin-like modifier-activating enzyme 6		AILSNEATK;AVTIHDTEK;DGSLFWQSPK;EDFTLLDFINAVK;FDLNEPLHLSFLQNAAK;FISADVHGIWSR;FWQTYSSAEEVLQK;GDRYDALR;GMITVTDPDLIEK;IDAHLNK;IQEFKPSNK;KPDHVPISSEDER;KYVDLTVSFAPDIDGDEDLPGPPVR;LETGQFLTFR;LKDGSLFWQSPK;LVKPTTEK;MLYVPVMPGHAK;MYSIEPADR;NFALLGVGTSK;NLPIMSTASVEIDDALYSR;NLVLAGIK;QDVIITALDNVEAR;RPPSPIK;SFPAAIEHTIQWAR;SYTAADATLK;TVFFESLER;VTGGYPFEAYK;VVQTDETAR;YGIEPTMVVQGVK;YVLGDTAMQK;YYFSHDTD
1.25479	1.24509	1.22599	1.22573	1.46552	1.2262	-0.0638596	0.327011	14	14	102.36	A0FGR8	ESYT2	Extended synaptotagmin-2		ADKDQANDGLSSALLILYLDSAR;ALALLEDEER;AQPPEAGPQGLHDLGR;EPTPSIASDISLPIATQELR;FQLSNSGPNSTIK;GANTHLSTFSFTK;IHFIEAQDLQGK;ITVPLVSEVQIAQLR;LEWLTLMPNASNLDK;LLDEWFTLDEVPK;NLIAFSEDGSDPYVR;VDVGQQPLR;VLVALASEELAK;VPLSQLLTSEDMTVSQR
-2.47969	-2.56465	-2.50533	-2.69657	-2.18419	-2.46369	-0.0684086	0.172318	6	6	164.2	A0JNW5	BLTP3B	Bridge-like lipid transfer protein family member 3B		DALLHHIK;GISFMDYLSDK;GNITPQLNK;ISEDESSGLVYK;SMSVDLSHIPLK;SSPEISLR
2.42063	2.46029	2.40798	2.33266	2.57557	2.44138	-0.0202347	0.100942	33	33	71.639	A0MZ66	SHTN1	Shootin-1		AESFAQEMFIEQNK;ALDENAK;ATQPETTEEVTDLK;ATQPETTEEVTDLKR;DQIVSVQEEK;DQIVSVQEEKK;EKATQPETTEEVTDLKR;ELEEQLENETLHK;ELRDQIVSVQEEK;EQAIGEYEDLRAENQK;ESAEALATK;HSVDELQK;ILAIELENLK;KILAIELENLK;KLEEFQK;KVTAEADSSSPTGILATSESK;LTQQLEEER;LVEVIEEVNK;MNSSDEEK;QAEPVVVLDPVSTHEPQTK;QAVEEMMDR;QLQLITSLK;QQLELLEEDKK;QQLELLEEDKKELELK;QSHLLLQSSIPDQQLLK;SLDPENSETELER;SMPVLGSVSSVTK;TKPESSK;TLEAEFNSPSPPTPEPGEGPR;TVLNSEVLEQR;…
-2.41297	-2.44008	-2.41045	-2.37426	-2.10736	-2.26508	-0.172264	1.03659	3	3	11.88	A0PJW8	DAPL1	Death-associated protein-like 1		ANEVQDLLSPR;IQTLDALNDALEK;KQEIGTLER
-1.09192	-1.36958	-0.947052	-1.40921	-0.986705	-1.17403	0.053799	0.111976	9	9	76.277	A1IGU5	ARHGEF37	Rho guanine nucleotide exchange factor 37		ALLGPQNLIK;AVSALQDVNTNINEYK;DLHLEAFLK;GQIVAILQNK;GYVPSGFLAR;ILENTVPDASAYPVLQR;LLEVGSVTYQEEAAR;LQLYHVVPSAEELRR;WLVDTGGHR
-0.130699	-0.264984	0.327358	0.0457382	-0.20621	-0.142979	0.0783752	0.150113	6	5	54.173	A1L020;Q6ZN04	MEX3A	RNA-binding protein MEX3A		ILEYNNENDFLAGSPDAAIDSR;LGGGGLR;RPPGEPLQGFSK;SGAAFGVAPALPGQVTIR;SPATSAGPELAGLPR;VVGLVVGPK
1.63087	1.59928	1.62886	1.69634	1.79642	1.69986	-0.111202	1.49842	18	18	67.867	A1L0T0	ILVBL	2-hydroxyacyl-CoA lyase 2		AAMGLGAR;AKRPLMVLGSQALLTPTSADK;DGHPVVVNILIGR;DIVPTLR;EMVPAKPPK;ENEDQVVK;HEVTAVFAADAMAR;HGGENVAAVLR;HKIPVMALVGNDAGWTQISR;IPVMALVGNDAGWTQISR;LGLFYQLLHK;LSGTVGVAAVTAGPGLTNTVTAVK;LVEGLQGQTWAPDWVEELR;LVEGLQGQTWAPDWVEELREADR;NAQMAQSPILLLGGAASTLLQNR;NHPLHIR;RPLMVLGSQALLTPTSADK;VLSHSSK
-4.20767	-3.77594	-4.26642	-4.17335	-3.30657	-3.894	-0.292038	0.416314	1	1	165.74	A1L4H1	SSC5D	Soluble scavenger receptor cysteine-rich domain-containing protein SSC5D		LEVWHGGR
0.547337	0.574486	0.516094	0.438396	0.772964	0.543367	-0.0389369	0.144222	12	10	101.58	A1X283	SH3PXD2B	SH3 and PX domain-containing protein 2B		AAAASVPNADGLK;AKPFLSNSLGGQDDTR;EGWAPASYLK;EGWAPATFIDK;FEGRPVPDGDAK;GAVVEVIQK;GSLGPWGTGK;HYVYIIR;IIPFLPGK;SFLPGEGPGR;SLLDGEGPQAVGGQDVAFSR;YTVIYPYTAR
-5.36036	-5.37739	-5.66799	-5.26584	-5.09077	-5.9986	-0.0168422	0.018964	3	3	47.421	A1Z1Q3	MACROD2	ADP-ribose glycohydrolase MACROD2		DYIPLNSILSWK;NHHEVDR;YVIHTVGPIAR
-2.52314	-2.39982	-1.87145	-2.22634	-2.19235	-2.23353	-0.0473992	0.0837888	9	0	95.047	A2A3N6	PIPSL	Putative PIP5K1A and PSMD4-like protein		ALYSTAMESIQGEAR;EAEFLQK;EKPLPTFK;EKVNVDIINFGEEEVNTEK;EPLSSETQYSVDTR;IVVMNNLLPR;LHTVQPK;LTAFVNTLNGK;VNVDIINFGEEEVNTEK
2.09243	2.13091	2.12711	2.16531	2.33006	2.17165	-0.105524	0.890018	39	39	268.57	A2RRP1	NBAS	NBAS subunit of NRZ tethering complex		AEEIEHYAR;AQDLHLFETLK;AVLQAVSDGQWWK;DDFTSIIGK;EAGHEAEAGSLLLAVR;EGLGNEVLK;ELLQYGLK;EYLVTLAK;FTADDQYKR;GDLKFPLK;GTDLEALLAIGK;GTHQAFR;HEHEAWPEDLISLTK;IFQHSKPDLQQK;IISALSGGSADLGGPR;IVDHLLASLQQGR;LATVMLTR;LATYEEILGVPHASEQR;LFWTGDPHLIK;LHPGDLITVVDAVTFSPK;LLDFTQAQILQGLR;LLGLAELLR;LLTYLDR;LSIWAIPSLK;LTDENMSPLEALEPVLSSQNILSISK;MVVEPNLQDESEFLYAAQPELLR;QSPGVANELLK;SAVNVASIQNYLSK;SLTYLRPLQGQK;STTPEELYQR;VAGE…
-1.25234	-1.24498	-1.09207	-1.16867	-1.06256	-1.13847	-0.0732317	0.528102	13	10	92.644	A2RTX5	TARS3	Threonine--tRNA ligase 2, cytoplasmic		AAEALAAEAVASR;AILGSVER;EILLEMFK;FADFGVLHR;GAFIYNTLTDFIR;HQPIFIK;IYGISFPDNK;MIAILSENYGGK;NAQLAQYNFILVVGEK;TLNAEEAF;TTPYQVAAEISQELAESTVIAK;VADGQTVQGEVWK;WPFWLSPR
-1.40744	-1.41085	-1.35594	-1.37186	-1.29546	-1.44065	-0.0220861	0.185051	4	4	67.038	A2RU67	FAM234B	Protein FAM234B		DSSPPSLQIEEPEWEK;ETPATSAVTSDQK;FVEAPYEI;GQNLTPYWALR
-1.64905	-1.43049	-1.7135	-1.79199	-0.946397	-1.48169	-0.190992	0.296302	6	6	36.547	A2RUC4	TYW5	tRNA wybutosine-synthesizing protein 5		AGQHLPVPR;DAQYLYLK;SEVLNIDNPDLAK;TLAELPEEYRDFYAR;VVLFSPR;WTVDYLSQVGGK
0.294958	0.313208	0.498669	0.319807	0.472243	0.28124	0.0111812	0.0436611	23	23	214.82	A3KMH1	VWA8	von Willebrand factor A domain-containing protein 8		DFLLGEHLLLVGNQGVGK;DGLIVYEDSPLVK;DLLGQDVFLIGPPGPLR;DPQVNAFAIFIGSLGDQATR;DTTVQTLTLQPSVK;EILINTLHK;EKVPNVPQEALDK;ELSLYDGSR;ENVVVIHPDFR;ETQDPTAQSLAASLSTR;EVEYIALSR;FPTEGLSSVVR;GNSLTVLDVLEGR;GPALINIQEYPIER;IADKEVTIK;LVLLDGIHR;NVLPVLNNLLENR;QYGPNVPEPILQK;RFELQDSGSSLLPK;SEEIQVIK;SLADQGIINYPYSTR;TLILEGLEK;VIALGLPVPR
-2.6713	-2.62271	-2.57262	-2.70726	-2.40572	-2.6241	-0.0431865	0.173397	7	7	154.31	A3KN83;Q9Y2G9	SBNO1	Protein strawberry notch homolog 1		EFSDFIQAVER;FQQAADLIDAEQR;GVIFATYSSLIGESQSGGK;IEEVLLSQSYVK;LGIWGEGTPFR;SELDVPVEILNITEK;TLEALEEGGGELNDFVSTAK
-0.516132	-0.593365	-0.67551	-0.681381	-0.701186	-0.700794	0.0994514	1.00386	6	6	42.932	A4D1E9	GTPBP10	GTP-binding protein 10		DFLHLFEK;IIHLDLK;LGGEGGK;LIADVGLVGFPNAGK;LLTNFLPLK;MVHCSCVLFR
0.700621	0.75161	0.662121	0.710936	0.898461	0.711628	-0.0688912	0.437067	16	16	83.343	A4D1P6	WDR91	WD repeat-containing protein 91		DYWSYLER;EEQQPEEEEALVQHK;FIQWNIHK;GFTHTLR;GKDPTSGAK;GMNQVPGR;LFALQAEIHR;LLLLGSGVGTVR;LLLWDTK;LSPAQGPPQPQSSAK;LTTLLAHK;LYDTEAK;SPLLSLEWATK;VASLDVDGVIK;VGFLSSLLPQSK;VSEYSLPSDATGPFVLSGYSGYK
-1.56921	-1.5532	-1.45433	-1.51041	-1.47564	-1.5529	-0.0125952	0.107502	6	6	51.445	A4D1U4	DENND11	DENN domain-containing protein 11		ELYDVYVDNQNVK;GSSLPPVYWLPSIHR;IQSDFIYFR;SVGILSPSYTLLYR;WAEGPAVSLPQAPQPQAGGWGR;YMHFLENQVR
-0.0563259	0.0905495	0.0363827	0.241814	0.223493	-0.107388	-0.0957708	0.324243	6	6	49.602	A5D8T8;Q8NCF0;Q6UXF7	CLEC18A;CLEC18C;CLEC18B	C-type lectin domain family 18 member A;C-type lectin domain family 18 member C;C-type lectin domain family 18 member B		GGVLAQIK;KGGVLAQIK;LDWSDSLAQLAQAR;LETTNEVIDSDFETR;RLDWSDSLAQLAQAR;VQDILAFYLGR
-1.7097	-1.57965	-1.62336	-1.7715	-1.49279	-1.74699	0.0328576	0.123946	9	9	109.54	A5PKW4	PSD	PH and SEC7 domain-containing protein 1		ADLEAAQR;ALSETELK;EAYLEFEK;EVSSHAQR;LATLFGGPADTGFLNQGDTWSSPR;LQWAIDEEELRR;LVAGEYLK;SFHGILK;SLSELADPNPK
-2.74236	-2.46112	-2.5589	-2.53649	-2.42239	-2.65542	-0.0493612	0.175991	1	1	31.135	A5PLL7	PEDS1	Plasmanylethanolamine desaturase 1		RLEDLIQGLTGEKPR
-1.48512	-1.50568	-1.51927	-1.47771	-1.37083	-1.35419	-0.102442	1.20502	4	4	46.523	A5PLN9	TRAPPC13	Trafficking protein particle complex subunit 13		ADLQTSSQR;AYLQPMDTR;FQVLKPLDVK;GVTVIGK
2.86932	2.86011	2.85076	2.82366	3.07485	2.82723	-0.0485195	0.227995	54	54	266.94	A5YKK6	CNOT1	CCR4-NOT transcription complex subunit 1		AAANFSDR;AGPEMDKR;APPEDDNR;APPEDDNREIATWK;AQAEQQHNPAANPTMIR;ASQQEIQHIVNR;AVEGLLDATSGADADLLLR;AVQELVHPVVDR;DAIAALGLLQK;DFALDSEESR;DLDSYLK;DVPPSINTTNIDTLLVATDQTER;EIDDEANSYFQR;ELHITACLFGGIIEK;ELNPSLNFK;EPLLMSISTNLK;EVTYELDHPGFQIR;GAFGVGQEQIDAFLK;GEQYDQAK;GLHNVVYGIQR;GNAPEGLPQLMEVVR;GQQELLYVVPFVAK;HGPEADR;IAFIFNNLSQSNMTQK;ILDVAQDLK;ILPDSGGVAK;ILTNFTGVMPPQFK;IVEPPENIQEK;KDFALDSEESR;LAEVGQYEQVK;LATEFE…
0.634024	0.632032	0.670727	0.575991	0.637097	0.521877	0.0672725	0.88063	3	1	14.688	Q9GZQ8;A6NCE7	MAP1LC3B;MAP1LC3B2	Microtubule-associated proteins 1A/1B light chain 3B;Microtubule-associated proteins 1A/1B light chain 3 beta 2		FLVPDHVNMSELIK;IPVIIER;QLPVLDK
-1.42167	-1.19428	-1.32282	-1.43835	-0.967624	-1.35572	-0.0590258	0.136769	6	6	53.974	A6NCL7	ANKRD33B	Ankyrin repeat domain-containing protein 33B		ALMLAGADVHAR;APAPTFQPERPAR;GAQVEEDPADYEEFEDFSSLPDTR;GPEDGGVLDHMVR;GPQAQEEDEVGGAGQR;YRPELPPPPEAAR
0.56411	0.523287	0.506241	0.552015	0.674743	0.536774	-0.0566314	0.53168	6	6	34.006	A6NDG6	PGP	Glycerol-3-phosphate phosphatase		AVEMAAQR;GETAVPGAPEALR;LAGAPAPK;LGFITNNSSK;QADIIGKPSR;TILTLTGVSTLGDVK
-2.55433	-2.659	-2.68639	-2.6049	-2.49407	-2.70929	-0.0304836	0.153904	5	5	33.62	A6NDU8	RIMOC1	RAB7A-interacting MON1-CCZ1 complex subunit 1		AAAVSSVVR;ASAALEK;ELISFLSEPEILVK;QILNFFHHR;RVEELGDLAQAHIQQLSEAAGEDDHFLIR
-0.272533	-0.27177	-0.388121	-0.240263	-0.210792	-0.306538	-0.0582774	0.536477	12	12	52.47	A6NE02	BTBD17	BTB/POZ domain-containing protein 17		ADVGGEAAGTSINHSQAVLQR;AHLAGGAGPAVGWYHYAVGTGDEALR;ARPPPAVAER;LVVTPASSGGDAAGVSFQK;NYLAPAWGAPWVINNPAR;STSFQTQLGPSGHDAGR;TVLVGAR;VQAAGTDEVR;VTWNVLFSPR;WLPVSLRPVYADAAGTALPAARPEDGRPR;YGVSSLQR;YPMIPPAQLFQLQAR
-1.99435	-1.78079	-1.87927	-1.88786	-1.70804	-1.84465	-0.0712887	0.362152	4	4	40.078	A6NED2	RCCD1	RCC1 domain-containing protein 1		AGPGPEALLQVWAAESALR;APFYRPLAPELR;GEPLWAQNVVPEAEGEDDPAGEAQAGR;RVEYFVDK
-2.88681	-2.94433	-2.99396	-2.97371	-2.61329	-2.86692	-0.12373	0.483462	2	2	30.293	A6NGB7	TMEM221	Transmembrane protein 221		AQPQQGIHR;GLHELSPPSFEDDLARPAEVSK
-2.36356	-1.92666	-2.30776	-2.27113	-2.22536	-2.07589	-0.00853316	0.0190006	3	3	28.732	A6NGC4	TLCD2	TLC domain-containing protein 2		APTGLLVAGASFLAFR;GLHWGLR;RLPTPESAAR
-0.518482	-0.497053	-0.473446	-0.631878	-0.422124	-0.58095	0.0486568	0.307557	11	11	139.65	A6NGG8	PCARE	Photoreceptor cilium actin regulator		ASVSPLDLLPSK;DSEDSQAVIAK;EPQEQPNLLQQLLQYTVSK;GSIPLLVK;KPALDLSSPPATSQSPEVK;LEAFYALGAK;LPNAIPSGEVSEAAK;SFASLESPESSK;VDFPEPLVK;VSPSNTTSR;YTGLAPLYPKPQISPASGR
-0.925737	-0.928816	-0.986965	-0.899965	-0.839902	-0.726892	-0.12492	1.07738	4	4	36.794	A6NGN9	IGLON5	IgLON family member 5		DGFTSEGEILEISDIQR;LLSSGTAEGLK;SNILYAGNDR;VLVTVNYPPTITDVTSAR
0.41802	0.347113	0.469475	0.391146	0.299726	0.351021	0.0642385	0.657135	5	1	49.908	A6NHL2	TUBAL3	Tubulin alpha chain-like 3		EDAANNYAR;FDLMYAK;LDHKFDLMYAK;LDHKFDLMYAKR;SFGGGTGSGFTSLLMER
1.6468	1.60703	1.63562	1.65605	1.64201	1.58604	0.00178242	0.0243977	12	11	34.803	A6NHQ2	FBLL1	rRNA/tRNA 2-O-methyltransferase fibrillarin-like protein 1		DHAVVVGVYRPLPK;DLVNVAK;GAEDALVTLNMVPGQSVYGER;GGGGDGGGQGGK;HEGVFIYR;IVALNAHTFLR;KLQQENLKPQEQLTLEPYER;LAAAILGGVDQIHIKPK;LQQENLKPQEQLTLEPYER;MLIGMVDVIFADVAQPDQSR;RVTVTEGGVK;TNIIPVLEDAR
3.0245	3.02304	3.02837	3.05952	3.15568	3.04128	-0.0601886	0.781369	61	61	226.37	A6NHR9	SMCHD1	Structural maintenance of chromosomes flexible hinge domain-containing protein 1		AAADGGGPGGASVGTEEDGGGVGHR;AHVEGDGVVEGIIR;ANLGVFSVFAPR;DLNSQLEYLR;DSTEYFIVFEPR;DVAPVEK;EAIYSGYIR;EDSQILK;EFALWLK;EHLLQGLLPDVQVPTSVK;EINITSALAEK;EIQDDMQTLYVNTAADSFEFK;EKDQLSQSIVMYK;EKDSFTAVVITGVQPEHIQYLK;EKESELGDRPLQVGER;FGGLQNK;FIPGPPGNK;FLHHLIIEEK;FSFGLLDLPFR;FVITTTSR;GEHTLQVK;GMVFGAPVPK;GSGDVLGK;GSNEEDTDTPLFIGK;GVITRPDLPSK;GVITRPDLPSKK;IAHLAQIEDDR;IDFLPHYDTLVK;IHNIDIPTTQQVPHIEALLK;IKPPTPAVSNVR;I…
-2.62249	-2.71156	-2.35917	-2.44408	-2.56288	-2.58086	-0.0351292	0.111453	3	2	36.056	A6NHX0	CASTOR2	Cytosolic arginine sensor for mTORC1 subunit 2		ESIPLFTYGLIK;LQVASVAK;MELHILEHR
-1.40165	-1.45298	-1.5158	-1.48159	-1.3469	-1.54549	0.0011816	0.00576524	7	6	98.568	A6NI28	ARHGAP42	Rho GTPase-activating protein 42		EQIGAAK;GITILGLYR;GLPTLEFSDSYLDSPDFR;LIQNANDVLIAPLEK;LLIAVEEER;TGLVPENYVVFL;VEAVHALVHK
-0.538301	-0.533365	-0.462044	-0.520802	-0.342521	-0.382343	-0.096015	0.74186	7	6	28.136	A6NIH7	UNC119B	Protein unc-119 homolog B		AAAAASAAGPGGLVAGK;AAAAASAAGPGGLVAGKEEK;AGGGVLNR;LMIENPYETR;QAPHHAADDGVGAAVTEQELLALDTIRPEHVLR;SDSFYFVDNK;YQFTPAFLR
-1.07498	-1.05316	-1.07376	-1.13981	-1.00604	-1.12458	0.022844	0.205965	6	6	45.209	A6NKD9	CCDC85C	Coiled-coil domain-containing protein 85C		AALAATGAASGGGGGGGGAGSR;AKPAATAAAASEELSQVPDEELLR;ELVLLLDEER;LQDDNQELR;LQQHLLEIR;VLEVHENLDR
-0.184752	-0.0909996	-0.196878	-0.254877	0.0761175	-0.300182	0.00210412	0.00559701	4	4	7.4762	A6NKN8	PCP4L1	Purkinje cell protein 4-like protein 1		AALAIQGK;AEEEEEIDIDLTAPETEK;KAEEEEEIDIDLTAPETEK;TSPATNQAAGQEEK
-1.34059	-1.14714	-1.4185	-1.23865	-1.07406	-1.2585	-0.111677	0.488091	27	1	197.48	A6NKT7;Q7Z3J3;Q99666;O14715	RGPD3;RGPD4;RGPD5;RGPD8	RanBP2-like and GRIP domain-containing protein 3;RanBP2-like and GRIP domain-containing protein 4;RANBP2-like and GRIP domain-containing protein 5/6;RANBP2-like and GRIP domain-containing protein 8		AVVSPPK;ELLESFDSALQSAK;FDAEVSQWK;FGISEPGNQEK;FKTPELAEEFK;FVFGSESVK;GFSGAGEK;IAVAVLEETTR;ILDDSDSNLSVVK;ILQNYDNK;KLPVPLESVK;KVEHLAVR;LFPGSPAIYK;LLLDIPLQTPHK;LLVQHEINTLR;LQDVADSFK;NSIPEPIDPLFK;RIFSSEK;SGQSALYDALFSSQSPK;SNNSETSSVAQSGSESK;STSGEGFQFGK;SVELNPTQK;TFLTNDQTK;TPELAEEFK;WAEDQNSLLK;YDKDVGQWK;YDVGAIR
0.363546	0.195501	0.129503	0.161732	0.454495	0.122305	-0.0166604	0.0452481	23	23	247.17	A6NMZ7;A8TX70	COL6A6	Collagen alpha-6(VI) chain		AFLGALLDHFEITPEPETSVTGDR;AINKYPPINLK;ALQEAHR;ASEENLK;AYTGAAIK;DVTEQEFER;EFLASVVQDFDVSLNR;EIAGEEK;EISFQIENIK;GFLEESVSALDIK;GQTLLEGQPWMETYLQDILR;IGAAQFSDTYHPEFPLGTFIGEK;INTGTPQVLLVLTDGQSQDEVAQAAEALR;MISAGLPGEMGSPGEPGPPGRK;QFPPILVVLASSESEDNVEEASK;SEVLQHIQNLSPR;VALAQYSDK;VALLSHAPPDFLPNTQK;VGLVAYSNETK;VVLLFSDGLDDDVEKLEQK;VYAIGIK;VYYVHDFDALK;YADDPEVLFYLDDFGTK
-3.45878	-3.29033	-3.31	-3.38428	-3.20816	-3.27858	-0.0626942	0.353127	4	4	197.3	A7E2V4	ZSWIM8	Zinc finger SWIM domain-containing protein 8		DGLVIPLVELSAK;IAFWSFPENEEDIR;LAYQESEVAALLK;QVAFHIPFEVVEK
0.186653	0.164604	0.282669	0.209732	0.370397	0.231398	-0.0592	0.404611	16	15	230.53	A7KAX9	ARHGAP32	Rho GTPase-activating protein 32		AHQEASHR;EASWDVAEQPTTADFAAATLQR;ELPNPLLTYQLYEK;ERPDWEETLSAMAR;FHTIIEFPLER;FSQLSELPR;GADVPEIPGDLTLK;IHDVIQQLPPPHYR;LLTLEEAQAR;LSPFFTLDLSPTEDK;SFFNLGK;SLLVSSPSTK;SSVHSEEDDFVPELHR;TQAQVNSPIVTENK;VPLLHLR;YIEVGEGPAALQGK
-0.681438	-0.75156	-0.894783	-0.759823	-0.705033	-0.772766	-0.0300531	0.171957	6	6	125.09	A8CG34;Q96HA1;Q6PJE2;A6NF01	POM121C;POM121;POMZP3	Nuclear envelope pore membrane protein POM 121C;Nuclear envelope pore membrane protein POM 121;POM121 and ZP3 fusion protein		ASLQWFNQALEDK;ETVLSALK;GISQLWK;IAPPDRR;KVQLLPSR;TVEEEDQIFLDGQENK
-3.49174	-3.37606	-3.48278	-3.43002	-2.94495	-3.58775	-0.129286	0.261704	4	4	9.3738	A8MSI8	LYRM9	LYR motif-containing protein 9		AIEDADWIMNK;GIQQHYK;RPLQLYR;VHSDEDNPER
0.880194	0.870722	0.950567	0.878584	1.05653	0.930393	-0.0546757	0.394519	12	11	87.434	A8MVW0	FAM171A2	Protein FAM171A2		ALTVGTSIPAWR;AWFVSLDGR;GGESAGLK;LALSEDTEPSSSESR;LGGEAGAAGVGDEPAPPEGTAPGPAR;LPVSSTYSQLWASLTPASTQQEMR;SAEGPGGLEPGLEEHR;SPPEPPSPQEILIK;SQPLVQFQR;STDASLDSGVDVHEARPAR;TGLCSPEDNSLTPLLDEVAAPEGR;TLLAAGTTDSEGVATLPLSYR
-0.583399	-0.598402	-0.665213	-0.603725	-0.514651	-0.633127	-0.0318365	0.296075	8	7	115.01	A8MW92	PHF20L1	PHD finger protein 20-like protein 1		AAAAAAAK;AGEEVLAR;AVGVDGAEK;EGLKDEEDFFDFK;ITGLLASK;LEALDYLQK;LRPLERPALR;MLVHFER
0.930782	0.998232	0.952377	0.97645	1.14941	0.97414	-0.0728706	0.521919	5	4	8.496	P62308;A8MWD9	SNRPG;SNRPGP15	Small nuclear ribonucleoprotein G;Putative small nuclear ribonucleoprotein G-like protein 15		AHPPELK;GNSIIMLEALER;GNSIIMLEALERV;HVQGILR
-0.807646	-0.962397	-0.94673	-0.832458	-0.810452	-0.733957	-0.113301	0.919912	4	4	25.423	A9UHW6	MIF4GD	MIF4G domain-containing protein		IQSFDAETQQLLK;LQQEYQAR;TALKDPGAVDLEK;VGEQLEK
1.8037	1.86111	1.87096	1.8098	1.95596	1.88948	-0.0398245	0.350634	20	20	91.732	B1AK53	ESPN	Espin		AADIQSYMDMLNPELGLPR;ALEQALQAAR;DPLDALPVHHAAR;DPSAELEAK;FGHPEVVNWLLHHGGGDPTAATDMGALPIHYAAAK;FLVEEAALPAAAR;GDFPSLR;GLTTVFSGIGQPAFQPDSPLPSVSPALSPVR;LLVEHYPEGVNAQTK;MQEEEEQR;QKQEELRR;QPSTGDYYR;RKEEEEEAR;SFNMMSPTGDNSELLAEIK;SLHAAGLLGPSLR;SLHAAGLLGPSLRDPLDALPVHHAAR;SLKPTPQSK;TLGYDESK;TVENLSVEHR;VQDKDNSGATVLHLAAR
-6.29591	-6.21222	-6.43567	-6.45115	-5.82869	-6.44723	-0.072244	0.121615	4	2	292.7	B2RTY4	MYO9A	Unconventional myosin-IXa		FLPIYNPK;LIFHLVR;SLLHLHK;VNDLDNEDSK
-0.341568	-0.368025	-0.289145	-0.31286	-0.162879	-0.19556	-0.109146	1.0021	6	6	52.916	P0CG08;B7ZAQ6	GPR89B;GPR89A	Golgi pH regulator B;Golgi pH regulator A		GEVHNKPSGFWGMIK;HGILSIEQLISR;LGDPFPILSPK;LLQTMDMIISK;NVTDTDILALER;QLFLETADLYATK
-3.02864	-2.98956	-3.03684	-3.04988	-2.89351	-2.96309	-0.0495199	0.448245	2	2	38.018	B7ZBB8	PPP1R3G	Protein phosphatase 1 regulatory subunit 3G		AEDLEQLGGLLAAAAVAAPLSAPPSR;LRPLFQLPGPSAAAER
-1.74553	-1.88494	-0.483067	-1.2108	-2.17076	-2.26414	0.510722	0.38473	1	1	23.063	B9A064	IGLL5	Immunoglobulin lambda-like polypeptide 5		VTVLGQPK
-0.458841	-0.434219	-0.449337	-0.493446	-0.128934	-0.548529	-0.0571629	0.163068	9	9	49.994	C4AMC7;Q6VEQ5;A8K0Z3;Q9NQA3;A8MWX3;A0AAG2TVC3	WASH3P;WASH2P;WASHC1;WASH6P	Putative WAS protein family homolog 3;WAS protein family homolog 2;WASH complex subunit 1;WAS protein family homolog 6		ATLLESIR;EEAVQQMADALQYLQK;GPGAGEGPGGAFAR;KYVFLDPLAGAVTK;LFDAPLSISK;LQEYGSIFTGAQDPGLQR;REEAVQQMADALQYLQK;SQVQAIGEK;YVFLDPLAGAVTK
-0.53857	-0.566967	-0.658644	-0.640854	-0.458205	-0.53627	-0.0429506	0.267863	6	6	10.92	C9JLW8	MCRIP1	Mapk-regulated corepressor-interacting protein 1		FIYEAWQGVER;GLVEEYVEK;SPPSSSEIFTPAHEENVR;TFKPIDLSDLK;TFKPIDLSDLKR;VPNPSLK
-3.02517	-2.7309	-2.83789	-2.59286	-1.87558	-2.87493	-0.416864	0.603016	7	2	52.247	O76013;CON__O76013	KRT36	Keratin, type I cuticular Ha6		ENAELESR;ETMQFLNDR;LAADDFR;LVLQIDNAK;QLVEADINGLR;QLVEADINGLRR;QNQEYQVLLDVK
-2.71877	-2.41741	-2.67802	-2.75393	-3.32091	-2.51942	0.260018	0.435169	8	2	59.56	O95678;CON__O95678	KRT75	Keratin, type II cytoskeletal 75		AEAESWYQTK;AQYEDIANR;FASFIDK;FLEQQNK;NLDLDSIIAEVK;TAAENEFVALK;TAAENEFVALKK;YEDEINK
0.120962	-0.414629	-0.333178	-0.158567	-0.286881	-0.164782	-0.00553799	0.0106276	11	3	51.561	P02533;CON__P02533;CON__Q6IFX2;CON__Q61782	KRT14	Keratin, type I cytoskeletal 14		ALEEANADLEVK;APSTYGGGLSVSSSR;ASLENSLEETK;DAEEWFFTK;EVATNSELVQSGK;LAADDFR;LASYLDK;LEQEIATYR;LLEGEDAHLSSSQFSSGSQSSR;VLDELTLAR;VTMQNLNDR
-0.70105	-1.06511	-0.913103	-0.812273	-1.34832	-0.696793	0.0593761	0.0934525	19	2	60.044	P02538;CON__P02538;P48668;CON__P48668;CON__P04259	KRT6A;KRT6C	Keratin, type II cytoskeletal 6A;Keratin, type II cytoskeletal 6C		ADTLTDEINFLR;AEAESWYQTK;AIGGGLSSVGGGSSTIK;AQYEEIAQR;EYQELMNVK;FASFIDK;FLEQQNK;GMQDLVEDFK;LEGLEDALQK;NKYEDEINK;NKYEDEINKR;NLDLDSIIAEVK;QLDSIVGER;QNLEPLFEQYINNLRR;SEIDHVK;SLYGLGGSK;TAAENEFVTLK;WTLLQEQGTK;YEDEINK
2.69905	2.30959	2.17113	2.40022	2.90986	2.51483	-0.215042	0.414015	30	21	53.704	P05787;CON__P05787;CON__H-INV:HIT000292931;CON__Q9H552;CON__H-INV:HIT000016045;CON__Q9DCV7;Q9NSB2;CON__Q9NSB2;CON__Q6ISB0;CON__REFSEQ:XP_092267	KRT8	Keratin, type II cytoskeletal 8		AEAESMYQIK;AQYEDIANR;ASLEAAIADAEQR;ASLEAAIADAEQRGELAIK;DVDEAYMNK;DVDEAYMNKVELESR;ELQSQISDTSVVLSMDNSR;EYQELMNVK;FASFIDK;FLEQQNK;ISSSSFSR;KLLEGEESR;LEGLTDEINFLR;LLEGEESR;LQAEIEGLK;LSELEAALQR;LVSESSDVLPK;NKYEDEINK;NKYEDEINKR;QLETLGQEK;QLYEEEIR;SLDMDSIIAEVK;SNMDNMFESYINNLR;SYTSGPGSR;TEMENEFVLIK;TKTEISEMNR;TQEKEQIK;WSLLQQQK;YEDEINK;YEELQSLAGK
-2.57095	-2.49103	-2.316	-2.65762	-2.38989	-2.68891	0.119482	0.420475	2	0	26.558	P07477;CON__P07477;Q8NHM4	PRSS1;PRSS3P2	Serine protease 1;Alpha-trypsin chain 1;Alpha-trypsin chain 2;Putative trypsin-6		LGEHNIEVLEGNEQFINAAK;NKPGVYTK
-1.71011	-1.8878	-1.8415	-1.93115	-1.50059	-1.81271	-0.0649862	0.177522	8	3	44.105	P08727;CON__P08727;CON__P19001	KRT19	Keratin, type I cytoskeletal 19		AALEDTLAETEAR;DYSHYYTTIQDLR;EVAGHTEQLQMSR;IVLQIDNAR;LAADDFR;LASYLDK;LEQEIATYR;VLDELTLAR
3.97863	2.71643	2.64985	3.31359	2.54796	3.04742	0.145312	0.107746	32	25	58.826	P13645;CON__P13645;CON__P02535-1;Q7Z3Y7;CON__Q7Z3Y7;Q2M2I5;CON__Q2M2I5;Q99456;Q7Z3Y9;CON__A2AB72;CON__Q7Z3Y9;CON__Q99456	KRT10	Keratin, type I cytoskeletal 10		ADLEMQIESLTEELAYLK;ADLEMQIESLTEELAYLKK;AETECQNTEYQQLLDIK;ALEESNYELEGK;DAEAWFNEK;ELTTEIDNNIEQISSYK;ELTTEIDNNIEQISSYKSEITELRR;GSLGGGFSSGGFSGGSFSR;HGNSHQGEPR;IKEWYEK;IRLENEIQTYR;KDAEAWFNEK;LAADDFR;LASYLDK;LENEIQTYR;LKYENEVALR;NHEEEMK;NHEEEMKDLR;NVQALEIELQSQLALK;NVSTGDVNVEMNAAPGVDLTQLLNNMR;QSLEASLAETEGR;QSVEADINGLR;QSVEADINGLRR;SEITELR;SKELTTEIDNNIEQISSYK;SLLEGEGSSGGGGR;SQYEQLAEQNR;SQYEQLAEQNRK;SSSSG…
-0.194834	-0.882729	-0.90568	-0.352036	-0.919633	-0.714931	0.0011193	0.00127555	18	3	62.378	P13647;CON__P13647	KRT5	Keratin, type II cytoskeletal 5		AQYEEIANR;EYQELMNTK;FASFIDK;FLEQQNK;GLGVGFGSGGGSSSSVK;LAELEEALQK;NKYEDEINK;NKYEDEINKR;NLDLDSIIAEVK;NMQDLVEDFK;QLDSIVGER;QNLEPLFEQYINNLRR;SFSTASAITPSVSR;SLYNLGGSK;TEAESWYQTK;WTLLQEQGTK;YEDEINK;YEELQQTAGR
3.04128	2.35203	2.34539	2.95506	2.42081	2.75534	-0.130837	0.178472	36	26	65.432	P35908;CON__P35908v2;CON__P35908	KRT2	Keratin, type II cytoskeletal 2 epidermal		AAFGGSGGR;AQYEEIAQR;DVDNAYMIK;DYQELMNVK;EEAEALYHSK;EIKIEISELNR;FASFIDK;FLEQQNQVLQTK;GEHALKDAR;GFSSGSAVVSGGSR;GGGFGGGSSFGGGSGFSGGGFGGGGFGGGR;GGSGGGGSISGGGYGSGGGSGGR;GGSISGGGYGSGGGK;GGSSSGGGYGSGGGGSSSVK;GSSSGGGYSSGSSSYGSGGR;HGGGGGGFGGGGFGSR;IEISELNR;KYEDEINKR;LNDLEEALQQAK;LQGEIAHVK;LQGEIAHVKK;NKLNDLEEALQQAK;NLDLDSIIAEVK;NVQDAIADAEQR;NVQDAIADAEQRGEHALK;SKEEAEALYHSK;SLVGLGGTK;TAAENDFVTLK;TAAENDFVTLKK…
-5.70668	-5.75468	-5.89584	-5.53671	-5.78511	-5.42605	-0.203115	0.777671	7	2	48.105	Q04695;CON__Q9QWL7;CON__Q04695	KRT17	Keratin, type I cytoskeletal 17		ALEEANTELEVK;DAEDWFFSK;EVATNSELVQSGK;LAADDFR;LASYLDK;LEQEIATYR;VLDELTLAR
-0.913857	-0.818645	-0.879408	-0.784266	0.136025	-0.763863	-0.399936	0.585746	11	2	46.213	Q14525;CON__Q14525	KRT33B	Keratin, type I cuticular Ha3-II		ETMQFLNDR;LAADDFR;LASYLEK;LVVQIDNAK;QLVESDINSLR;QLVESDINSLRR;QNHEQEVNTLR;QNQEYQVLLDVR;QVVSSSEQLQSYQAEIIELR;QVVSSSEQLQSYQAEIIELRR;TIEELQQK
-0.981815	-1.02781	-1.13682	-1.04837	-1.21916	-1.23204	0.117708	0.718166	2	2	68.886	CON__Q28065;P04003	C4BPA	C4b-binding protein alpha chain		GYILVGAK;TWYPEVPK
0.0783405	0.141968	0.949839	0.320961	0.140647	-0.222029	0.310189	0.407884	10	10	129.39	CON__Q28194;P07996;P35442	THBS1	Thrombospondin-1		AQGYSGLSVK;ELANELR;FVFGTTPEDILR;GFLLLASLR;GGVNDNFQGVLQNVR;GPDPSSPAFR;GVEHATANK;IEDANLIPPVPDKK;IPESGGDNSVFDIFELTGAAR;TLWHDPR
-1.97099	-2.02045	-1.26976	-1.76857	-2.12389	-2.23371	0.288323	0.441885	2	2	22.144	CON__Q2KIS7;P05452	CLEC3B	Tetranectin		GGTLGTPQTGSENDALYEYLR;TQLDSLAQEVALLK
-0.622456	-0.357193	-0.589378	-0.365555	1.29521	-0.614647	-0.628012	0.446079	16	1	54.195	P78385;CON__Q6NT21;CON__P78385;O43790;CON__O43790;CON__Q14533;Q14533	KRT83;KRT86;KRT81	Keratin, type II cuticular Hb3;Keratin, type II cuticular Hb6;Keratin, type II cuticular Hb1		AEAESWYR;ATAENEFVALK;ATAENEFVALKK;EEINELNR;EYQEVMNSK;FAAFIDK;FAAFIDKVR;FLEQQNK;KYEEEVALR;LLEGEEQR;LQFYQNR;LTAEVENAK;LYEEEIR;RLYEEEIR;TKEEINELNR;YEEEVALR
1.02171	0.924492	0.96806	0.983049	1.02816	1.11006	-0.0690031	0.671912	6	6	205.42	E9PAV3;Q9BZK3	NACA	Nascent polypeptide-associated complex subunit alpha, muscle-specific form		DIELVMSQANVSR;IEDLSQQAQLAAAEK;NILFVITKPDVYK;NNSNDIVNAIMELTM;QVTGVTR;SPASDTYIVFGEAK
-1.4001	-1.16062	-1.27466	-1.27129	-1.12391	-1.2315	-0.0695626	0.352687	4	4	14.234	E9PRG8	C11orf98	Uncharacterized protein C11orf98		APQDVEMKDLEDES;TAMEVEAPSKPAR;TSEPQLK;VVGAVIDQGLITR
1.40045	1.44053	1.15083	1.46326	1.11986	0.780731	0.209318	0.409913	1	1	11.981	P01308;F8WCM5	INS;INS-IGF2	Insulin;Insulin B chain;Insulin A chain;Insulin, isoform 2		GFFYTPK
-1.9891	-1.90007	-1.9124	-1.91811	-1.83346	-1.97425	-0.0252479	0.19597	4	4	11.25	L0R819	ASDURF	ASNSD1 upstream open reading frame protein		EYQEIENLDK;GTRPEDSSVLIPTDNSTPHKEDLSSK;IVVDELSNLK;IVVDELSNLKK
0.0367413	-0.0632591	-0.141272	-0.0828629	-0.0743589	-0.130058	0.0398302	0.297305	2	2	39.58	O00115	DNASE2	Deoxyribonuclease-2-alpha		AFQPLVK;ALINSPEGAVGR
0.379959	0.343143	0.285109	0.316036	0.387797	0.246716	0.0192207	0.145097	13	13	72.911	O00116	AGPS	Alkyldihydroxyacetonephosphate synthase, peroxisomal		ASLNPSDTPPSVVNEDFLHDLK;ESISDVGFGMLK;ETNISYSQEADDR;EWIQNTLGVNVEHK;EYVDPNNIFGNR;GFDPNQLSVATLLFEGDR;GFDPNQLSVATLLFEGDREK;GISDPLTVFEQTEAAAR;IRPVPEYQK;KGQIELTGK;KNIYGNIEDLVVHIK;NIYGNIEDLVVHIK;RYPLSGMGLPTFK
3.50378	3.46445	3.45411	3.57564	3.72316	3.53934	-0.138604	1.11978	30	30	79.954	O00139;Q99661	KIF2A	Kinesin-like protein KIF2A		AALQEEEQASK;ATANFGK;AVFQESIR;DLDVITIPSK;DLDVITIPSKDVVMVHEPK;DSFIGENSR;DVFLMLK;DVVMVHEPK;EFGPPSR;ELTVDPTAAGDVRPIMHHPPNQIDDLETQWGVGSSPQR;FDYAFDDSAPNEMVYR;FSLIDLAGNER;FTARPLVETIFER;GADTSSADR;GIYALAAR;GSLDYRPLTTADPIDEHR;IDILTELR;IDILTELRDK;KEFGPPSR;LEGAEINK;LQQQELR;NKPHTPFR;QQVQVVGLQER;SHAVFQIILR;THTMGGDFSGK;TSGQTSANAHSSR;VFDLLNR;VFDLLNRK;VLEDGKQQVQVVGLQER;YLENQTFR
-2.23923	-2.14451	-2.36587	-2.20808	-1.85845	-2.22545	-0.15254	0.489813	17	3	49.129	O00148	DDX39A	ATP-dependent RNA helicase DDX39A		AEQDVENDLLDYDEEEEPQAPQESTPAPPKK;DEEVLKK;DFLLKPELLR;DVQEIFR;ELAFQISK;GLAITFVSDENDAK;GMAQEER;GSYVSIHSSGFR;ILNDVQDR;ILVATNLFGR;KDEEVLK;KDEEVLKK;LTLHGLQQYYVK;MLEQLDMR;RDVQEIFR;VSVFFGGLSIK
-0.433926	-0.487562	-0.400875	-0.433043	-0.400605	-0.372028	-0.0388956	0.560281	9	9	36.071	O00151	PDLIM1	PDZ and LIM domain protein 1		DFEQPLAISR;MNLASEPQEVLHIGSAHNR;QELNEPPK;QSTSFLVLQEILESEEK;TTQQIDLQGPGPWGFR;VAASIGNAQK;VITNQYNNPAGLYSSENISNFNNALESK;VTPPEGYEVVTVFPK;VWSPLVTEEGK
2.73808	2.66558	2.68397	2.70418	2.76695	2.71906	-0.0341895	0.520649	15	15	41.796	O00154;Q6ZUV0	ACOT7	Cytosolic acyl coenzyme A thioester hydrolase		AASAFFTYVSLSQEGR;ATLWYVPLSLK;IMRPDDANVAGNVHGGTILK;LMDEVAGIVAAR;MIEEAGAIISTR;MTFTSNK;QEQEEEGR;QEQEEEGRK;QGHAEPQP;SLPVPQLVPETEDEK;SLPVPQLVPETEDEKK;SLPVPQLVPETEDEKKR;SMEIEVLVDADPVVDSSQK;TNIVTASVDAINFHDK;VLEVPPVVYSR
-0.130732	-0.10988	-0.124582	-0.15999	0.114545	-0.122398	-0.0657835	0.311851	16	16	121.68	O00159	MYO1C	Unconventional myosin-Ic		AVASEIFK;DGTIDFTPGSELLITK;GAPVGGHILSYLLEK;GDVVLQSDHVIETLTK;GEELLSPLNLEQAAYAR;GVSFYEVPPHLFAVADTVYR;HLGYKPEEYK;KRPETVATQFK;LGTDEISPR;LLQSNPVLEAFGNAK;LLSVEGSTLR;NFHIFYQLLEGGEEETLR;NPQSYLYLVK;TFTWLVGK;VLQALGSEPIQYAVPVVK;YLGLLENLR
-4.45563	-4.36512	-4.30156	-4.32439	-3.87661	-4.18489	-0.245469	0.81363	3	3	23.354	O00161	SNAP23	Synaptosomal-associated protein 23		AHQITDESLESTR;IEEGLDQINK;ILGLAIESQDAGIK
-0.838528	-0.894114	-0.912033	-0.871765	-0.753163	-0.861496	-0.05275	0.528723	6	6	31.62	O00165	HAX1	HCLS1-associated protein X-1		FHDNFGFDDLVR;GFFGFPGPR;HEADSSPR;ITKPDGIVEER;SLFDLFR;YPDSHQPR
-1.14477	-1.53036	-1.19847	-0.861826	-0.762713	-0.413017	-0.612016	1.55034	1	1	10.441	O00168	FXYD1	Phospholemman		TGEPDEEEGTFR
0.950285	0.950161	0.947355	0.904858	1.15214	0.934616	-0.0479364	0.242735	12	12	37.664	O00170	AIP	AH receptor-interacting protein		AHAAVWNAQEAQADFAK;AVPLIHQEGNR;GELPDFQDGTK;GKPMELIIGK;HVVLYPLVAK;LREDGIQK;NIAVGKDPLEGQR;QKDEEDKAR;TLHSDDEGTVLDDSR;VESPGTYQQDPWAMTDEEK;VIQEGRGELPDFQDGTK;VLELDPALAPVVSR
1.78781	1.75257	1.735	1.80583	1.88312	1.74545	-0.0530125	0.548485	16	15	72.453	O00178	GTPBP1	GTP-binding protein 1		AAAAAAR;AVGTITK;DDVIVTASNFSSER;GGQTASFALK;IPVLVQSK;KIPVLVQSK;LLQTTNNSPMNSKPQQIK;LVLVSPTSEQYDSLLR;MFLNLLSPR;RVGDNDFLEVR;SMAEQIEADVILLR;STLLGVLTHGELDNGR;TPEYLHIDQR;VAVVGNVDAGK;VGDNDFLEVR;VITFIDLAGHEK
1.94297	1.84942	1.88046	1.98774	2.01462	1.96038	-0.096633	1.4211	16	16	67.764	O00186	STXBP3	Syntaxin-binding protein 3		ALYFITPTSK;ANYLEDR;ANYLEDRK;DIMEDAIDNRLDSK;EAILEEEDDLWVR;IENESDMIR;IMLLDEFTTK;KLEDYYK;LAQLVEK;MTDLLEEGITVVENIYK;SAEETFQLSR;SKPLDNASK;TEQDLALGTDAEGQK;THSQLLIIDR;TSLSALTQLMK;VLLPVLLNK
1.51274	1.53275	1.46119	1.55457	1.70257	1.51283	-0.0877619	0.645821	30	30	104.64	O00192	ARVCF	Splicing regulator ARVCF		AASHVLQTVWSYK;AVAIALR;AYLSSGGGFPEGPEPR;DAEWTTVFK;DLIGSYAMAELVR;DSPSYGSLSR;DVIPMDALGPDGYSTVDRR;EAFPVGPEPGPPGGR;ELVTGTLWNLSSYEPLK;EPNEDSKPR;EVPGADRYQEAEPGPLGSAVGSQR;FQAEPYGLEDDTR;FQSAAATAK;GALSPGGFDDSTLPLVDK;GASSAGEASEKEPLK;GASSAGEASEKEPLKLDPSR;GFELLYQPEVVR;GLGMRPPR;GLPLLVALLDHPR;GLPVLVELLQSETDK;GLPVLVELLQSETDKVVR;GVPALVALVASSQSVR;HPVDPVK;LVDAVGDAKPQPVDSWV;LYLSLLTESR;MVIIDHGLQTLTHEVIVPHSGWER;QVPVGP…
1.24528	1.27668	1.14033	1.10081	1.36462	1.21247	-0.0052042	0.0199524	6	6	20.332	O00193	SMAP	Small acidic protein		ESHPHGVK;INEELESQYQQSMDSK;KINEELESQYQQSMDSK;LVIGDHK;SASPDDDLGSSNWEAADLGNEER;TGEEDKK
1.9286	1.90014	1.91148	1.94338	2.12093	2.01225	-0.112115	1.00498	32	26	121.32	O00203	AP3B1	AP-3 complex subunit beta-1		AKQENSAK;ATGYLELSNWPEVAPDPSVR;DRDHFQLGTLSHTLNIK;EASADLSPYVR;EFQTYVK;EGSTAQLIINTEK;ELKPVLSQG;EMLIEVIEK;EVQYIVLQNIATMSIQR;GLAAHYFFPR;GMFEPYLK;IENIHIGEK;IFLAQKPAPLLESPFK;KGMFEPYLK;KIENIHIGEK;LEILTNLANEANISTLLR;LLDSITVPVAR;LLQMQPAQHGEIIK;LLTQYILNLGK;LQILNLGAK;LYLTNSK;LYSLDPEQK;NASELFPAVVK;NVEVIELAK;QFAAATIQTIGR;SEAGIISK;SFTSEDDLVK;TVIGSVLLR;VPIIVPIMMLAIK;VVNVANVGAVPSGQDNIHR;YAEEQQDLALLSISTFQR;YDQNYDIR
-2.29105	-2.14572	-2.15697	-2.19522	-2.10574	-2.27849	-0.00476233	0.0232978	4	4	77.243	O00213	APBB1	Amyloid beta precursor protein binding family B member 1		DLLLQLEDETLK;GPGLIISTQEQGPDEGEEK;LVDVPFQVEFPAPK;LVEPQSQALLHAQPIISIR
0.263144	0.216805	0.334654	0.302324	0.337174	0.396816	-0.0739044	0.773828	5	5	23.705	O00217	NDUFS8	NADH dehydrogenase [ubiquinone] iron-sulfur protein 8, mitochondrial		EPATINYPFEK;GLGMTLSYLFR;RYPSGEER;TLLWTELFR;YDIDMTK
3.58337	3.54184	3.50422	3.56377	3.67719	3.5708	-0.0607773	0.633659	31	31	47.463	O00231	PSMD11	26S proteasome non-ATPase regulatory subunit 11		AAAAVVEFQR;AALTSAR;AELRDDPIISTHLAK;ALLVEVQLLESK;AQSLLSTDR;AQSLLSTDREASIDILHSIVK;DDPIISTHLAK;DIQENDEEAVQVK;EASIDILHSIVK;EQSILELGSLLAK;FHGILDQGEGVLIIFDEPPVDK;IMLNTPEDVQALVSGK;KFHGILDQGEGVLIIFDEPPVDK;KLSQMILDK;KLSQMILDKK;LQATLDMQSGIIHAAEEK;LSQMILDK;LVSLYFDTK;LYDNLLEQNLIR;RDIQENDEEAVQVK;RYQEALHLGSQLLR;SLADFEK;TAYSYFYEAFEGYDSIDSPK;TGQAAELGGLLK;TYEAALETIQNMSK;TYHALSNLPK;VIEPFSR;VQIEHISSLIK;VVDSLYNK;YQE…
3.29924	3.25743	3.24359	3.30493	3.43998	3.361	-0.101883	1.12484	21	21	52.904	O00232	PSMD12	26S proteasome non-ATPase regulatory subunit 12		AIYDTPCIQAESEK;DPNNLLNDWSQK;EAASILQELQVETYGSMEK;EEMIHNLQ;EWDLLNENIMLLSK;FFQEENTEK;GSLESPATDVFGSTEEGEK;GSLESPATDVFGSTEEGEKR;KGSLESPATDVFGSTEEGEK;KGSLESPATDVFGSTEEGEKR;KLEEIPK;LFTTMELMR;LNSLMSLVNK;MAQLLDLSVDESEAFLSNLVVNK;MEVDYSATVDQR;SVVLYVILAPFDNEQSDLVHR;TASDMVSTSR;TTHLIAK;VEFILEQMR;VVEHNIR;WSTLVEDYGMELR
1.07713	0.956537	0.952744	1.00819	1.2362	1.1152	-0.124392	0.735791	8	8	24.682	O00233	PSMD9	26S proteasome non-ATPase regulatory subunit 9		ANYDVLESQK;DMAEAHK;KEEIEAQIK;KLGQSESQGPPR;LGQSESQGPPR;QVEEALHQLHAR;RKEEIEAQIK;SDVDLYQVR
0.424557	0.387802	0.381659	0.407997	0.646953	0.629169	-0.163367	0.981461	3	3	7.4016	O00244	ATOX1	Copper transport protein ATOX1		TVSYLGLE;YDIDLPNK;YDIDLPNKK
0.542204	0.535818	0.480022	0.490656	0.670295	0.434271	-0.0123924	0.0580491	8	8	67.496	O00255	MEN1	Menin		EAEAAEAEEPWGEEAR;EFFEVANDVIPNLLK;ELLVATK;GAVDLSLYPR;GLGTGQGAVSGPPR;KPPGTVAGTAR;VSDVIWNSLSR;VSTPSDYTLSFLK
-1.38754	-1.29884	-1.32391	-1.41793	-1.23699	-1.41452	0.0197134	0.109094	6	5	61.367	O00257	CBX4	E3 SUMO-protein ligase CBX4		AAGAEEK;EAFGEQPLQLTTKPDLLAWDPAR;GQGHQYELNSK;GYLGAVKPLAGAAGAPGK;LLIAFQNR
0.0530205	-0.0168915	-0.0595779	0.0826721	-0.19888	-0.0867653	0.0598415	0.271993	6	6	19.779	O00258	GET1	Guided entry of tail-anchored proteins factor 1		AEIQDMK;DAEQESQMR;ILLPSFSSFMSR;LVAFPTR;VVAIVLHPFS;WITPLDR
2.42549	2.31381	2.33978	2.50841	2.46494	2.58761	-0.160626	1.50741	12	12	21.671	O00264	PGRMC1	Membrane-associated progesterone receptor component 1		DFTPAELR;DFTPAELRR;EGEEPTVYSDEEEPK;EGEEPTVYSDEEEPKDESAR;FYGPEGPYGVFAGR;GDQPAASGDSDDDEPPPLPR;ILMAINGK;IVRGDQPAASGDSDDDEPPPLPR;KFYGPEGPYGVFAGR;RDFTPAELR;RDFTPAELRR;RFDGVQDPR
2.22987	2.22775	2.19507	2.19521	2.33832	2.18881	-0.0232178	0.175833	32	32	121	O00267	SUPT5H	Transcription elongation factor SPT5		DNELIGQTVR;DQREEELGEYYMK;DTYLDTQVVGQTGVIR;DVTNFTVGGFAPMSPR;EATGVLLSIDGEDGIVR;EMTDVLK;ETFQVLNMYGK;EVANLKPK;FAVALDSEQNNIHVK;FEGDTGLIVR;FIAYQFTDTPLQIK;GIYKDDIAQVDYVEPSQNTISLK;GYIGVVK;GYIYVEAYK;HEDLKDMLEFPAQELR;ILSVDGNK;ISQGPYK;KFIAYQFTDTPLQIK;LGYWNQQMVPIK;MDLDEQLK;QAIEGVGNLR;RDNELIGQTVR;SLGGDVASDGDFLIFEGNR;SSVGETVYGGSDELSDDITQQQLLPGVK;SVVAPEHVK;TPAQSGAWDPNNPNTPSR;TPMYGSQTPLQDGSR;VEENFVILFSDLTMHELK;V…
-1.26283	-1.3334	-1.19443	-1.18441	-1.29644	-1.27995	-0.00995032	0.0651441	3	3	110.11	O00268	TAF4	Transcription initiation factor TFIID subunit 4		ALSAVSAQAAAAQK;ELNSSPQPYLVPFLK;FFEQLDQIEK
0.382387	0.400564	0.262131	0.363119	0.599977	0.415577	-0.111197	0.592006	10	10	36.521	O00273	DFFA	DNA fragmentation factor subunit alpha		AAFGEEVDAVDTGISR;ASPPGDLQNPK;ETSSDVALASHILTALR;FVALASNEK;LQHTLQQVLDQR;LQHTLQQVLDQREEVR;LQQTQSLHSLR;MEVTGDAGVPESGEIR;QAPELSLSSQDLELVTK;QAPELSLSSQDLELVTKEDPK
-2.63318	-2.3001	-2.6573	-2.53416	-2.59263	-2.5187	0.0183058	0.0537054	2	2	28.232	O00287	RFXAP	Regulatory factor X-associated protein		LEESADNILSIVK;SPEVVQFLQK
2.50598	2.43043	2.55552	2.46804	2.52141	2.44366	0.0196053	0.172527	29	28	116.22	O00291	HIP1	Huntingtin-interacting protein 1		ADKDSPNLAQLQQASR;AELDELRR;AGDTGVK;AIGEELLPR;AINTQEVAVK;AQANEQR;AQLENMK;AVGWGATVMVDAADLVVQGR;DGHPNVLK;EEELSALR;EEELSALRK;ELEDSLER;ELQDTQLK;ETLAYLASLEEEGSLENADSTAMR;GAQTFWSVVNR;GHVSELEADLAEQQHLR;GVNQATAGVVASTISGK;HYELAGVAEGWEEGTEASPPTLQEVVTEKE;IEEMLSK;ISDQGQR;KAQANEQR;KTQEQLEVLESLK;LIQIPQLPENPPNFLR;QAQVDLER;SSNLQYFK;VKADKDSPNLAQLQQASR;VLELENELQK;WTEGLISASK;YSELVQNHADLLR
1.40706	1.41363	1.48533	1.50397	1.50366	1.40798	-0.0365324	0.377627	13	5	40.92	O00292	LEFTY2	Left-right determination factor 2		AFDVTEAVNFWQQLSRPR;AQYVVLLR;EHLGPLASGAHK;FASQGAPAGLGEPQLELHTLDLR;FLASEASTHLLVFGMEQR;LFQEPVPK;LPPNSELVQAVLR;LVIPAHVR;LVSVHESGWK;QLQLSEVPVLDR;QPLLLQVSVQR;TRPQVVSLPNMR;VTVEWLR
2.95707	2.93575	2.90034	2.95549	3.0574	2.9297	-0.0498095	0.516039	27	25	60.609	O00294;O75386	TULP1	Tubby-related protein 1		APDAEDEEEEEEEDEEDEEEEAEEK;APQTVYAR;EAPAGEGTK;EEPSPDPAQAR;EFVLRPAPQGR;ETFLVAR;EVWASDSGHEEESLSPEAPR;FLRDPEAK;FTVFDNGQNPQR;GDLGSPDPPPKPLR;GGENFIGK;GMYPSYFLHLDTEK;GSGEADKDPSGSPASAR;GYSTNVASLR;KEEEEEEEAATVIK;KGSGEADKDPSGSPASAR;MTVIIPGMSAENER;NASDGLLVR;NFQIVHADDPDYIVLQFGR;PLRDETLR;QELAAVIYETNVLGFR;QRPAPAQR;TANYLISIDPTNLSR;TLESLIELHNKPPVWNDDSGSYTLNFQGR;VAEDAFTLDYR;VFLLAGR;VTQASVK
3.33397	3.36033	3.27251	3.2777	3.37225	3.33482	-0.00598558	0.054526	12	12	26.922	O00299	CLIC1	Chloride intracellular channel protein 1		AEEQPQVELFVK;AGSDGAK;EEFASTCPDDEEIELAYEQVAK;GFTIPEAFR;GVTFNVTTVDTK;GVTFNVTTVDTKR;LAALNPESNTAGLDIFAK;LFMVLWLK;NSNPALNDNLEK;RTETVQK;VLDNYLTSPLPEEVDETSAEDEGVSQR;YLSNAYAR
1.58936	1.52375	1.5119	1.5853	1.67449	1.71098	-0.115251	1.21882	11	11	37.563	O00303	EIF3F	Eukaryotic translation initiation factor 3 subunit F		AYVSTLMGVPGR;FLMSLVNQVPK;IGVDLIMK;LHPVILASIVDSYER;NMYELHK;RNEGAAR;TMGVMFTPLTVK;VIGLSSDLQQVGGASAR;VIGTLLGTVDK;VSADNTVGR;YAYYDTER
-6.45268	-6.4064	-6.67334	-6.3434	-6.01868	-6.76174	-0.1362	0.232062	3	3	98.911	O00308	WWP2	NEDD4-like E3 ubiquitin-protein ligase WWP2		AFLDGFNEVAPLEWLR;DLESIDPEFYNSIVWIK;LLYAIEETEGFGQE
1.46089	1.42625	1.45393	1.46236	1.51547	1.34907	0.00472164	0.0317087	11	11	54.122	O00330	PDHX	Pyruvate dehydrogenase protein X component, mitochondrial		AAAVTLK;ANLENPIR;EHIPGTLR;GIQEIADSVK;GLLTPIIK;HSLDASQGTATGPR;ILMPSLSPTMEEGNIVK;IVVEEGSK;LTEDEEGNAK;VSVNDFIIK;VVDDELATR
-1.49559	-1.43852	-1.6058	-1.33474	-1.06985	-1.41849	-0.238945	0.964902	6	6	106.84	O00339	MATN2	Matrilin-2		AIEEELQEIASEPTNK;AQDDVSEWASK;GFTLNPDKK;SLGEENFEVVK;SVNTHDYAK;YLFEEDNLLR
-0.877676	-0.902382	-0.583799	-0.932156	-0.680369	-0.849333	0.0326668	0.0922021	4	4	82.577	O00391	QSOX1	Sulfhydryl oxidase 1		ALAEDVK;EGAVLAK;LAGAPSEDPQFPK;SALYSPSDPLTLLQADTVR
1.1816	1.21143	1.1246	1.12283	1.2468	1.0643	0.0278966	0.178014	4	4	20.747	O00399	DCTN6	Dynactin subunit 6		GDVTIGPR;GSSTPVKN;ILPNYHHLK;VQTERPQPQTLQLDFLMK
-1.57884	-1.58195	-1.56111	-1.53264	-1.40787	-1.54831	-0.0776949	0.799567	5	5	60.908	O00400	SLC33A1	Acetyl-coenzyme A transporter 1		EALLGDTGTGDFLK;EGDREALLGDTGTGDFLK;LLWAPLVDAVYVK;LVEEGVPK;YTAGPQPLNTFYK
0.098835	0.0975208	0.119968	0.120855	0.280036	0.0819225	-0.0554965	0.382321	9	9	54.826	O00401	WASL	Actin nucleation-promoting factor WASL		AALLDQIR;AVTDLLGR;DALLDQIR;FYGPQVNNISHTK;KAVTDLLGR;LLWEQELYNNFVYNSPR;SSVQQQPPPPR;SVADGQESTPPTPAPTSGIVGALMEVMQK;VIYDFIEK
2.88267	2.86657	2.88101	2.90961	3.10048	2.99407	-0.124636	1.05602	30	28	123.63	O00410	IPO5	Importin-5		AAAAAEQQQFYLLLGNLLSPDNVVR;AIGTEPDSDVLSEIMHSFAK;AKLEEHFK;ATAAFILANEHNVALFK;EFQQYLPVVMGPLMK;EGFVEYTEQVVK;EHIMQMLQNPDWK;FLFDSVSSQNVGLR;FMQDASDVMQLLLK;FYFHDGVR;HIVENAVQK;IFSIIAEGEMHEAIK;ITFLLQAIR;KQAEETYENIPGQSK;LLSSAFDEVYPALPSDVQTAIK;LMVPLLK;LQELIQK;LVLEQVVTSIASVADTAEEK;LVLPMIK;NLIDEDGNNQWPEGLK;NTTAAEEAR;QAEETYENIPGQSK;QMAAVLLR;RQDEDYDEQVEESLQDEDDNDVYILTK;SLLIPYLDNLVK;SLVEIADTVPK;TAGLEEK;VIAALLQTMED…
-4.55207	-4.51948	-4.60388	-4.68805	-4.16628	-4.635	-0.062033	0.136644	4	4	82.143	O00418	EEF2K	Eukaryotic elongation factor 2 kinase		ADEDLIFR;GASNYVAK;LNALDLEK;YIEPVDRDVYFEDVR
2.30045	2.20895	2.14855	2.17222	2.19645	2.20655	0.0275793	0.239837	12	12	17.561	O00422	SAP18	Histone deacetylase complex subunit SAP18		APPPSGR;EIGSTMSGR;ELTSLVK;EVYPEAR;FQIGDYLDIAITPPNR;GNVPSSELQIYTWMDATLK;GTDDSMTLQSQK;GTHFNFAIVFTDVK;KEPEKPIDR;KGTDDSMTLQSQK;VTQEEIK;VTQEEIKK
2.50572	2.48782	2.44485	2.40793	2.58073	2.46376	-0.00467841	0.0291189	26	26	89.86	O00423	EML1	Echinoderm microtubule-associated protein-like 1		ARPLMQTLPLR;DGTLVSGGGK;DQVDSYSLEAK;DTSIMQWR;EPVFSAEEGYVK;ETAVPATK;GDVILIGTTR;GRPVTMYMPK;HYAGHNDDVK;IASLEQR;IIEDPAQSSGFHPSGSVVAVGTLTGR;ITIATGQVAGTSK;KETAVPATK;KLISWSGNYQK;KLLSTGDDFGK;KPTGSLPSPSGVR;KTEIPEQFGPIR;LISWSGNYQK;LLSTGDDFGK;LNITEEQQAVLNR;QVVSVETTR;RLNITEEQQAVLNR;SALADVVR;TEIPEQFGPIR;VQMQEDDIQLLK;WFVFDTETK
3.0789	3.06621	3.04455	3.11255	3.07523	3.03682	-0.0116491	0.184769	28	22	63.704	O00425	IGF2BP3	Insulin-like growth factor 2 mRNA-binding protein 3		AEEEIMK;AEEEIMKK;AIEALSGK;ALQSGPPQSR;EEVKLEAHIR;ENAGAAEK;FAGASIK;FTEEIPLK;IAPAEAPDAK;IELHGKPIEVEHSVPK;IEQDTDTK;IKEENFVSPK;ILAHNNFVGR;IPVSGPFLVK;IQEILTQVK;ITISPLQELTLYNPER;KENAGAAEK;KIEQDTDTK;KIQEILTQVK;LLVPTQFVGAIIGK;LNGFQLENFTLK;LYIGNLSENAAPSDLESIFK;MVIITGPPEAQFK;QGSPGSVSK;SILEIMHK;TVNELQNLSSAEVVVPR;VAYIPDEMAAQQNPLQQPR;VPSFAAGR
3.15504	3.16971	3.22529	3.15648	3.25832	3.13876	-0.00117779	0.00902155	35	35	81.876	O00429	DNM1L	Dynamin-1-like protein		AEELLAEEK;ALQGASQIIAEIR;AVMHFLVNHVK;DIELQIR;DTLQSELVGQLYK;EAADMLK;ELPSAVSR;EVDPDGR;EVDPDGRR;FISNPNSIILAVTAANTDMATSEALK;GHAVNLLDVPVPVAR;GVSPEPIHLK;IFSPNVVNLTLVDLPGMTK;INVLAAQYQSLLNSYGEPVDDK;KNIQDSVPK;KYPSLANR;LDLMDAGTDAMDVLMGR;LEEPSLR;LGIIGVVNR;LLMHHIR;LYTDFDEIRQEIENETER;MEALIPVINK;NIQDSVPK;NVASGGGGVGDGVQEPTTGNWR;RLEEPSLR;RPLILQLVHVSQEDK;RPLILQLVHVSQEDKR;SATLLQLITK;SSLLDDLLTESEDMAQR;SSVLESLVGR;SVT…
1.90484	1.90978	1.85408	1.88712	1.9164	1.80713	0.019351	0.20043	11	11	39.336	O00442	RTCA	RNA 3-terminal phosphate cyclase		AFVAGVLPFK;DLYVNIQPVQEPK;DMAAAAVR;GGGEVIVR;GGIHTADTK;GGTNAEMAPQIDYTVMVFKPIVEK;KSEDEEDAAK;QLNPINLTER;STPGLRPQHLSGLEMIR;VEVDGSIMEGGGQILR;VGIEAAEMLLANLR
0.906366	0.957579	0.884594	0.838884	0.976804	0.867033	0.0219393	0.175909	24	24	190.68	O00443	PIK3C2A	Phosphatidylinositol 4-phosphate 3-kinase C2 domain-containing subunit alpha		ALDIDVEK;AQISSNSGFK;AVDQVIK;DALQPQTTDAEATIFFTR;DKPLAEWLR;DLVTEDGADPNPYVK;DPWDAVLLEER;EGQIEPSFVFR;ENFFLGGVTLPLK;GFELSSSTR;GMVELVPASDTLR;ILASAPNWK;KYNPSEEEYEK;LIESSLGSIATK;LLDILHK;LLLDDSFETK;LPLKPSLVAK;LVQLLGGVAEK;SADAGSFSPTPGQIGGAVK;SLSVATVTR;TADVTSLFGGEDTSR;TAEDDETPVDLNK;TFDEFQELHNK;VSLPLFDFK
-3.19363	-3.12795	-3.16126	-3.14748	-2.85304	-3.04861	-0.144574	0.749751	5	4	81.544	O00459	PIK3R2	Phosphatidylinositol 3-kinase regulatory subunit beta		ALGATFGPLLLR;DGAPEPGLTLPDLPEQFSPPDVAPPLLVK;ERPEDLELLPGDVLVVSR;FLLQHLGR;TAIEAFNETIK
0.368481	0.359976	0.318632	0.262821	0.628314	0.299303	-0.0477832	0.152137	13	13	81.879	O00461	GOLIM4	Golgi integral membrane protein 4		AHQDIHTQLQDVK;AKEDFLVYK;EADPESEADR;EHQEALHQQR;FQSPYEEQLEQQR;KAEAVALK;LAVQQVEEAQQLR;LEAQETLNK;QAELEEGRPQHQEQLR;REPEEHQVEEEHRK;SQHEELKK;YLQLQQEK;YLQLQQEKEQELSK
2.72805	2.58908	2.64183	2.62516	2.65084	2.57079	0.0373939	0.328168	27	26	100.89	O00462	MANBA	Beta-mannosidase		DVNSIELR;DYVTLYVK;EFKIPFEISK;ELVLAGDK;FASEYGYQSWPSFSTLEK;FNDLNYR;FQSAVLYAAQQSK;FSDNGFLMTEK;GGEAVCLYEEPVSELLR;GSNWIPADSFQDR;GSPGLSFYFK;ILFNEVTIGETDNMFNR;INGFPIFLK;IPFEISK;LLLQSVVDANMNTLR;LPQSTDPLR;LQTQQTYSIELQPGK;LQTQQTYSIELQPGKR;NELEQSFHVTSLTDIY;QHHEGGNK;QMLYQAGLHFK;TILFYPWEPTSK;TVELIEEPIK;VNLILEGVDTVSK;VSSTEDWSFNSK;VTSELLR;YSFDITNVVR
2.55891	2.59818	2.49581	2.47458	2.52253	2.49595	0.0532777	0.743425	29	29	217.32	O00468	AGRN	Agrin;Agrin N-terminal 110 kDa subunit;Agrin C-terminal 110 kDa subunit;Agrin C-terminal 90 kDa fragment;Agrin C-terminal 22 kDa fragment		AAAVSSGFDGAIQLVSLGGR;AIVDVHFDPTTAFR;ALEPQGLLLYNGNAR;ALQSNHFELSLR;DFLALALLDGR;EPLYVGGAPDFSK;ESLLDGGNK;FDTGSGPAVLTSAVPVEPGQWHR;GDFVSLALR;GIVTDGR;GKDFLALALLDGR;GLHTFAR;GPSGLLLYNGQK;IFFVNPAPPYLWPAHK;KVPHTVLNLK;LELGIGPGAATR;LLDVNNQR;QLLTPEHVLR;RPLQEHVR;SAGDVDTLAFDGR;SELFGETAR;SFLAFPTLR;SIESTLDDLFR;SREPVTLGAWTR;STVPVNTNR;TEATQGLVLWSGK;VLGAPVPAFEGR;VLGESPK;VVISGFGDPLICDNQVSTGDTR
2.07942	1.98802	1.97004	1.87759	2.18099	2.08431	-0.035135	0.135457	21	21	84.685	O00469	PLOD2	Procollagen-lysine,2-oxoglutarate 5-dioxygenase 2		EFIAPVTLK;ESDGFHR;GFALLNFVVK;GGDGINSIGGGQK;IFQTLNGAVDEVVLK;IIAPLVTR;ILIEQNR;ISGGYENVPTDDIHMK;IVGPEENLSQAEAR;IVQQWNLQDNDDDQLFYTK;LADKYPVVHIGK;LLVITVATK;LTHLHEGLPVK;SEDYVDIVQGNR;VFAGYYTK;VLGQGEEWR;VVFAADGILWPDKR;VYIDPLK;VYIDPLKR;YIAVSFIDP;YLNSGGFIGYAPYVNR
-2.72008	-2.81107	-2.8187	-2.81352	-2.45982	-2.52337	-0.184378	0.74657	2	2	43.016	O00470;Q99687;A8K0S8;O14770;A6NDR6	MEIS1;MEIS3;MEIS3P2;MEIS2;MEIS3P1	Homeobox protein Meis1;Homeobox protein Meis3;Putative homeobox protein Meis3-like 2;Homeobox protein Meis2;Putative homeobox protein Meis3-like 1		DHDDTASTR;FHLLELEK
1.06208	1.11004	1.03833	1.04003	1.21922	1.07793	-0.0422392	0.292478	19	19	81.852	O00471	EXOC5	Exocyst complex component 5		ATTAELFEEPFVADEYIER;EAADIIQK;EVAAVLLHFK;GGPEAFDPK;HILAAEQK;IKEAADIIQK;KSDAEQYLK;KVQELQK;LHLIAQELPFDR;LIQNVFEIK;LLEEFVNHIQELQIMDER;LMEFNLGTDK;LSDPSDLPR;NILHSFVQLR;NLYDLYTR;NVDTVLMELGVR;QVGDIFSNPETVLAK;SDVFTNSEK;YFNEFLDGELK
2.13963	1.98493	1.92408	2.0421	2.10053	1.99674	-0.0302439	0.160256	7	5	9.5388	O00479	HMGN4	High mobility group nucleosome-binding domain-containing protein 4		ADAGKDGNNPAK;AEGTGDAK;DASTLQSQK;DGNNPAK;NRDASTLQSQK;VKDEPQR;VKDEPQRR
0.417711	0.279018	0.316095	0.363914	0.349236	0.424543	-0.0416231	0.366778	4	4	9.3697	O00483	NDUFA4	Cytochrome c oxidase subunit NDUFA4		FYSVNVDYSK;LGPNDQYK;NNPEPWNK;QIIGQAK
2.5192	2.46422	2.49309	2.49241	2.60628	2.51653	-0.0462389	0.535012	13	13	34.577	O00487	PSMD14	26S proteasome non-ATPase regulatory subunit 14		AGVPMEVMGLMLGEFVDDYTVR;AVAVVVDPIQSVK;AVEEEDK;AVEEEDKMTPEQLAIK;EMLELAK;HNESVVK;KNELEQK;LGGGMPGLGQGPPTDAPAVDTAEQVYISSLALLK;LINANMMVLGHEPR;MLLNLHK;QTTSNLGHLNKPSIQALIHGLNR;VIDVFAMPQSGTGVSVEAVDPVFQAK;VVIDAFR
2.21635	2.23595	2.18429	2.18478	2.43658	2.22784	-0.0708691	0.375223	21	19	64.699	O00499	BIN1	Myc box-dependent-interacting protein 1		AGDVVLVIPFQNPEEQDEGWLMGVK;AMHEASK;AQPSDNAPAK;ESDWNQHK;GVFPENFTER;GVFPENFTERVP;HHYESLQTAK;IAENNDLLWMDYHQK;IAKPVSLLEK;IASNVQK;KLVDYDSAR;LDLPPGFMFK;LNQNLNDVLVGLEK;LQAHLVAQTNLLR;LVDYDSAR;NQAEEELIK;QHGSNTFTVK;QLTEGTR;SPSPPDGSPAATPEIR;VNHEPEPAGGATPGATLPK;VQAQHDYTATDTDELQLK
2.15662	2.09826	2.12174	2.19862	2.22765	2.23588	-0.0951783	2.02188	14	6	57.81	O00505	KPNA3	Importin subunit alpha-4		AENPSLENHR;AQNVTLEAILQNATSDNPVVQLSAVQAAR;DSQVVQVVLDGLK;EAAWAISNLTISGR;GDFGTQK;IEVLQQHENEDIYK;KLLSSDR;KLLSSDRNPPIDDLIK;LLSSDRNPPIDDLIK;NPPIDDLIK;NVPQEESLEDSDVDADFK;RDEHLLK;SGILPILVK;VQTAALR
-0.932016	-0.783451	-0.98241	-0.93157	-0.591023	-0.946264	-0.07634	0.229156	8	4	48.111	O00506	STK25	Serine/threonine-protein kinase 25		AANVLLSEQGDVK;ADIWSLGITAIELAK;GIDNHTK;GLDYLHSER;LADFGVAGQLTDTQIK;LADFGVAGQLTDTQIKR;LMVHLVER;VDPEELFTK
0.00954628	0.137503	0.152191	0.071497	0.254075	-0.0197639	-0.00218932	0.00778844	11	11	63.065	O00519	FAAH	Fatty-acid amide hydrolase 1		AGLENMDR;ALDLDVVLTPMLAPALDLNAPGR;EEVYTSSQPLR;ELAPEAVLFTYVGK;GYFGDIWDK;LDPTVPPLPFREEVYTSSQPLR;LQNPDLDSEALLALPLPQLVQK;LSAFLSNMK;LWELQHEIEVYR;QGLLYGVPVSLK;SPGGSSGGEGALIGSGGSPLGLGTDIGGSIR
-5.96867	-6.02981	-5.63216	-6.03013	-5.75177	-5.99191	0.0477212	0.114566	2	2	84.347	O00522	KRIT1	Krev interaction trapped protein 1		DWPEILAELTNLDPQR;GNPENIEDAYVAVIRPK
1.71088	1.66007	1.79464	1.77253	1.77236	1.74152	-0.0402714	0.423649	20	20	86.488	O00534	VWA5A	von Willebrand factor A domain-containing protein 5A		AAITFLK;AISQGHQAFLLEGDSSSR;ALHSDRPPSASQPR;ASGGTSEFITGK;DVPRPILLGASAPLK;ELNKPVQGPLAHR;ETLILLLK;ETPASDKK;FVLPAVLNPR;IVAELQDK;KIVAELQDK;LISYAQLTGR;LMQADLGGTEILAPLQNIYR;MLSPEQTVIFR;SSVDPAIFAF;TPIVPVEDLPYTLSMVATIDSQHGIEK;VTFPLQPKPDVNLTIHR;YQFSGSSK;YTQQTMEEALGR;YVQELPLEADGALR
0.642139	0.637796	0.601824	0.641636	0.759707	0.66057	-0.0600513	0.706877	15	15	68.002	O00541	PES1	Pescadillo homolog		AHDEAVR;ELEAQEK;FLLHEPIVNK;GIYPHEPK;GSATNYITR;ITHQIVDRPGQQTSVIGR;KLQLSLADFR;LAALEEQR;LAALSASLAR;LAQEEESEAK;LAQEEESEAKR;LEGQAQAEAK;SEWNTVER;SFGGEVSWDK;VMAGTLK
-0.109613	-0.370249	-0.153584	-0.0983906	-0.18716	0.194382	-0.180759	0.571802	1	1	282.56	O00555	CACNA1A	Voltage-dependent P/Q-type calcium channel subunit alpha-1A		EVAEVSPLSAANMSIAVK
-2.52189	-2.55607	-2.4276	-2.5749	-2.4208	-2.49366	-0.00539875	0.0309331	2	2	24.377	O00559	EBAG9	Receptor-binding cancer antigen expressed on SiSo cells		EPLNFGIPDGSTGFSSR;QTDVEEWTSWDEDAPTSVK
0.583719	0.698303	0.698381	0.615124	0.938195	0.499788	-0.0242345	0.0615496	8	8	32.444	O00560	SDCBP	Syntenin-1		DSTGHVGFIFK;LYPELSQYMGLSLNEEEIR;MAPSIMK;SIDNGIFVQLVQANSPASLVGLR;SLMDHTIPEV;SLYPSLEDLK;SLYPSLEDLKVDK;VIQAQTAFSANPANPAILSEASAPIPHDGNLYPR
2.60543	2.5457	2.51271	2.55091	2.64892	2.51285	-0.0162808	0.121881	28	27	134.85	O00562	PITPNM1	Membrane-associated phosphatidylinositol transfer protein 1		AALQVEEESWNAYPYTR;AGAVDVVR;ALEEETAR;ALGIGVYPVR;DAVAPGEYK;DAVAPGEYKAEEDPR;EESSGEGSGVEILANRPYTDGPGGSGQYTHK;EGPGTPPTTLAR;FMYGPLDVVTLTGEK;FQAIAPLTVPR;GIEDGAQAPR;GPLSDDWAR;GSELATDPPAQPAAPSTTSEVVK;IEQFIHDVGLR;IHFPEALGHVALR;ILDTIDIVR;IPSDMASPEPEGSQNSLQAAPATTSSWEPR;LEPLLAPK;NVTSNHR;QADVQTLSSAFEAVTR;SAASNTGTPDGPEAPPGPDASPDASFGK;SQDHIPLAALPLLATSSSR;SSYGVAAPVDFLR;TNQAYSAFLR;VDVYIMTQPLSGK;VYHVGSHIPGWFR;WIHFG…
-3.3155	-3.17917	-3.11442	-3.34442	-2.86758	-3.29172	-0.0351267	0.0761895	4	4	78.863	O00566	MPHOSPH10	U3 small nucleolar ribonucleoprotein protein MPP10		LSLAEIYEQEYIK;LTLDHEK;TAEEENPEHVEIQK;VTFALPDDAETEDTGVLNVK
3.2482	3.22328	3.34984	3.27617	3.25946	3.18299	0.034236	0.286882	27	27	66.049	O00567	NOP56	Nucleolar protein 56		AILDASR;AQLGLGHSYSR;EAMVQAEEAAAEITR;EELMSSDLEETAGSTSIPK;EEPVSSGPEEAVGK;EETVNDPEEAGHR;ELNEDKLEK;ELNEDKLEKLEELTMDGAK;EVEEISLLQPQVEESVLNLGK;EWYGYHFPELVK;KNLDVMK;KVLLGVGDPK;LAQFIGNR;LEELTMDGAK;LHFHNLVK;LIAHAGSLTNLAK;LLLETHLPSK;LLLETHLPSKK;LSFYETGEIPR;MSQVAPSLSALIGEAVGAR;QSLHTYLR;SFSKEELMSSDLEETAGSTSIPK;STPKEETVNDPEEAGHR;VLLGVGDPK;VVSLSEYR;YGLIFHSTFIGR;YPASTVQILGAEK
3.22555	3.18406	3.12581	3.1652	3.32131	3.19121	-0.0474335	0.349826	29	27	73.243	O00571;O15523	DDX3X;DDX3Y	ATP-dependent RNA helicase DDX3X;ATP-dependent RNA helicase DDX3Y		DFLDEYIFLAVGR;DKDAYSSFGSR;DLLDLLVEAK;DREEALHQFR;DSLTLVFVETK;EIQMLAR;ELAVQIYEEAR;FSGGFGAR;GFYDKDSSGWSSSK;GLDISNVK;HAIPIIK;HVINFDLPSDIEEYVHR;IVEQDTMPPK;KQYPISLVLAPTR;LEQELFSGGNTGINFEK;MLDMGFEPQIR;QEVPSWLENMAYEHHYK;QSSGASSSSFSSSR;QYPISLVLAPTR;SDYDGIGSR;SFLLDLLNATGK;SHVAVENALGLDQQFAGLDLNSSDNQSGGSTASK;SPILVATAVAAR;SSFFSDR;VGNLGLATSFFNER;VGSTSENITQK;VVWVEESDKR;YIPPHLR;YLVLDEADR
-2.63329	-2.66837	-2.75095	-2.64153	-2.59087	-2.61644	-0.0679226	0.832904	3	3	29.48	O00584	RNASET2	Ribonuclease T2		ELDLNSVLLK;LGIKPSINYYQVADFK;VYGVIPK
1.17417	1.08249	0.887505	0.904156	1.11412	0.856424	0.0898218	0.317629	6	6	58.635	O00592	PODXL	Podocalyxin		ATFNPAQDK;DDLDEEEDTHL;EAGVSDMK;EITIHTK;LASVPGSQTVVVK;LKDKWDELK
1.0426	0.927784	1.03304	1.0282	1.14466	1.14834	-0.105923	0.917156	11	11	32.113	O00625	PIR	Pirin		DGVTVAVISGEALGIK;EQSEGVGAR;GGRPGGFPDHPHR;HSQPIPK;KVTLSVLSR;MNPGDLQWMTAGR;MVEPQYQELK;NLDPFLLFDEFK;SEEIPKPSK;SIGRPELK;TPTLYLDFK
-0.518337	-0.362158	-0.37743	-0.378555	0.293725	-0.180059	-0.331012	0.738596	12	4	57.886	O00629	KPNA4	Importin subunit alpha-3		ADNEKLDNQR;EAAWAISNLTISGR;GDFGTQK;IEQLQNHENEDIYK;KLLSSDR;KLLSSDRNPPIDDLIK;LLSSDRNPPIDDLIK;NEVVVELR;NPPIDDLIK;RDEHLLK;VQNTSLEAIVQNASSDNQGIQLSAVQAAR;VQTAALR
-5.81534	-5.66317	-5.82072	-5.61982	-5.87674	-5.9482	0.0485128	0.16242	2	2	61.465	O00634	NTN3	Netrin-3		FPVAVLAVFR;YLLLGGGPGAAAGGAGGR
0.488213	0.572016	0.649704	0.340487	0.846017	0.527506	-0.00135899	0.00286961	5	3	47.441	O00712	NFIB	Nuclear factor 1 B-type		AVKDELLSEKPEIK;EDFVLTVTGK;GIPLESTDGER;KPEKPLFSSASPQDSSPR;NPPGYLEDSFVK
1.42492	1.52436	1.44635	1.45926	1.63751	1.45784	-0.0529947	0.325678	13	13	35.144	O00743	PPP6C	Serine/threonine-protein phosphatase 6 catalytic subunit;Serine/threonine-protein phosphatase 6 catalytic subunit, N-terminally processed		AHQLVHEGYK;APLDLDK;APLDLDKYVEIAR;AVPDSER;GAGWLFGAK;GYYSLETFTYLLALK;MAPLDLDKYVEIAR;NQEIPHK;TGGQVPDTNYIFMGDFVDR;TTTPYFL;VTNEFVHINNLK;YLPENDLK;YLPENDLKR
-2.48256	-2.3727	-2.37511	-2.37702	-2.08929	-2.54078	-0.074427	0.210832	2	2	61.806	O00748	CES2	Cocaine esterase		ADHGDELPFVFR;IQELEEPEER
2.01785	1.97092	1.96	1.99063	2.18804	2.1096	-0.113165	0.87722	21	21	113.74	O00754	MAN2B1	Lysosomal alpha-mannosidase;Lysosomal alpha-mannosidase A peptide;Lysosomal alpha-mannosidase B peptide;Lysosomal alpha-mannosidase C peptide;Lysosomal alpha-mannosidase D peptide;Lysosomal alpha-mannosidase E peptide		ASTSLKPPTADLFTGVLPNGYNPPR;ATFDPDTGLLMEIMNMNQQLLLPVR;DGSLELMVHR;DLFSTFTITR;DYRPTWK;ELVDYFLNVATAQGR;FDTPLETK;FLEDTFGNDGRPR;HLVLLDTAQAAAAGHR;LEHQFAVGEDSGR;LEMEQVWR;LPVSEGVFVVK;LQETTLVANQLR;LVNAQQAK;QHVANDYAR;SPEYNAK;SQGGSSLR;TVDQYFYGIK;VAWHIDPFGHSR;WAQIHLVK;YYRTNHTVMTMGSDFQYENANMWFK
2.34473	2.33416	2.36219	2.36784	2.50147	2.38052	-0.0695823	0.735555	12	12	35.102	O00764	PDXK	Pyridoxal kinase		AQAGEGVRPSPMQLELR;DIEDPEIVVQATVL;GQVLNSDELQELYEGLR;IHSQEEALR;KIHSQEEALR;LNNMNKYDYVLTGYTR;NPAGSVVMER;RNPAGSVVMER;TVSTLHHVLQR;VLSIQSHVIR;VVPLADIITPNQFEAELLSGR;YDYVLTGYTR
-3.13483	-3.08733	-2.99187	-3.10336	-3.14678	-3.30674	0.114283	0.696482	1	1	41.522	O00767	SCD	Stearoyl-CoA desaturase		GSTLDLSDLEAEK
-8.8631	-8.39671	-8.16805	-8.51279	-8.50766	-8.62307	0.0718835	0.126676	2	1	67.737	O14492	SH2B2	SH2B adapter protein 2		LEFFVPPK;LLEAVAATAAEEPPEAAPGR
-2.14322	-2.18825	-2.20593	-1.94433	-1.7978	-2.02407	-0.257068	1.69419	3	3	35.116	O14495	PLPP3	Phospholipid phosphatase 3		AIVPESK;EILSPVDIIDR;STIQNPYVAALYK
2.66409	2.61756	2.61043	2.60749	2.75014	2.6627	-0.0427497	0.404411	38	34	242.04	O14497	ARID1A	AT-rich interactive domain-containing protein 1A		AAAGQESEGPAVGPPQPLGK;AAGPGLGNVAMGPR;AGPPVPASHIAPAPVQPPMIR;ALLALAK;AMGMTNLPAVGR;DITFPPGSVEATQPVLK;DKPASENSEEK;EEAGGEAAAAAAAER;EIGGLTQVNK;ELATNLNVGTSSSAASSLK;ELATNLNVGTSSSAASSLKK;EMAVVLLANLAQGDSLAAR;FPFGISPAQSHR;FPPPQELSQDSFGSQASSAPSMTSSK;GEDPPPDIFAAADSK;GEDPPPDIFAAADSKK;GYQGYPGGDYSGGPQDGGAGK;HPGLLLILGK;IGGGDTTEHIQTHFESK;ILEDEPHSK;ITATMDDMLSTR;KSSSSTTTNEK;LEEEEEEEVVENDEEIAFSGK;LSIQDNNVDLILATPPFSR;L…
-1.82471	-1.75708	-1.92347	-1.82925	-1.54606	-1.92506	-0.0682929	0.214646	2	2	17.043	O14521	SDHD	Succinate dehydrogenase [ubiquinone] cytochrome b small subunit, mitochondrial		AASLHWTSER;AVAMLWK
-0.618034	-0.578493	-0.635729	-0.66651	-0.353942	-0.687243	-0.0415208	0.140898	7	7	76.18	O14523	C2CD2L	Phospholipid transfer protein C2CD2L		AGAAEEPGVR;EAGLSQSHDDLSNATATPSVR;ERGEEQVELSTIEELIK;GLLASLFAFK;GPGPALAGEPAGSLR;QLTEPSGR;STLIISGVSK
-3.15862	-3.0706	-3.10626	-3.3789	-2.68875	-3.27953	0.00390275	0.00589978	8	8	144.91	O14525	ASTN1	Astrotactin-1		ETPILDGYEYDITDLR;EVAAGQVLK;GFDLVLGEQPSDK;ITLHVPEHLIADGSR;LWLEYEDISK;SRPSDVIVK;VLTFPEYITSLSDSGTK;YSEIKPYGLDWAELSR
-2.46437	-2.39446	-2.54403	-2.53899	-2.23742	-2.53724	-0.0297384	0.0975859	4	4	26.534	O14530	TXNDC9	Thioredoxin domain-containing protein 9		HLAILSK;LVEEHLDSEIQKLDQMDEDELER;VIPTLALLK;VLEHQLLQTTK
4.87502	4.89196	4.84433	4.86323	5.01239	4.84043	-0.034915	0.248148	29	29	61.877	O14531	DPYSL4	Dihydropyrimidinase-related protein 4		AVGKDNFALIPEGTNGIEER;DLGALAQVHAENGDIVEEEQK;DLGALAQVHAENGDIVEEEQKR;DNFALIPEGTNGIEER;EELEALVK;EKGVNSFLVFMAYK;GAADAIAQAK;GAPAVVISQGR;GLYDGPVHEVMVPAKPGSGAPAR;GVNSFLVFMAYK;GVVVFGEPITASLGTDGSHYWSK;IFNFYPR;IMAPPGGR;ISVPPVR;IVNDDQSFYADVHVEDGLIK;KTFPDFVYK;LAEIHGVPR;LLELGITGPEGHVLSHPEEVEAEAVYR;LQMPVLGMTPADDFCQGTK;MDENEFVAVTSTNAAK;MFVTPGAGR;MSMVWEK;NLHQSGFSLSGSQADDHIAR;QANCPLYVTK;TFPDFVYK;TIDAHGLMVLPGGVDVHT…
-1.86987	-1.81786	-1.92272	-1.84782	-1.60759	-1.7784	-0.125549	0.743063	3	3	64.84	O14545	TRAFD1	TRAF-type zinc finger domain-containing protein 1		AEFLDDQETR;AFESDVFHNR;LSNSDSQDIQGR
-0.122725	-0.149693	-0.178976	-0.100567	0.0619917	-0.210478	-0.0674467	0.346033	4	4	12.615	O14548	COX7A2L	Cytochrome c oxidase subunit 7A-related protein, mitochondrial		ADGVPVYLK;GLPDQMLYR;LTSDSTVYDYAGK;NKVPELQK
-1.91948	-1.93746	-1.88594	-2.05859	-1.64856	-1.88701	-0.0495698	0.154677	5	5	17.135	O14558	HSPB6	Heat shock protein beta-6		ASAPLPGLSAPGR;HEERPDEHGFVAR;HFSPEEIAVK;MEIPVPVQPSWLR;VVGEHVEVHAR
-0.569996	-0.532099	-0.586813	-0.387842	-0.41351	-0.470577	-0.138993	2.04417	2	2	17.417	O14561	NDUFAB1	Acyl carrier protein, mitochondrial		LSVNSHFMK;LYDKIDPEK
1.63864	1.60528	1.59961	1.60036	1.79792	1.64735	-0.0673672	0.481334	9	9	33.382	O14562	UBFD1	Ubiquitin domain-containing protein UBFD1		DAAQQDAK;FPLDSTGSELK;GKPEDVMPSVK;GLVPEDK;IHSITGLPPAMQK;IMVVGSTINDVLAVNTPK;LEQDQLWIGTK;LPMGSIK;LPTVPLSGMYNK
-1.95943	-1.81922	-1.86409	-1.93349	-1.83204	-1.93912	0.0206353	0.141488	1	1	23.973	O14569	CYB561D2	Transmembrane reductase CYB561D2		ALSAETESHIYR
0.304325	0.289762	0.817493	0.974295	0.70432	0.497223	-0.254752	0.502065	12	10	72.955	O14576	DYNC1I1	Cytoplasmic dynein 1 intermediate chain 1		ALAEDSDIFFDYSGR;ELEEKDGDVQAGANLSFNR;ELTEEEK;EVAVGDSEGR;EVVSYSK;IWVYDVGELAVPHNDEWTR;KEPVQDDSDLDR;LAQIREEK;QQILHSEEFLIFFDR;SVSTPSEAGSQDSGDLGPLTR;VGQDSELENQDK;VTQVDFLPR
1.53401	1.44157	1.47823	1.49341	1.59267	1.53714	-0.0564693	0.648921	13	13	34.482	O14579	COPE	Coatomer subunit epsilon		APPAPGPASGGSGEVDELFDVK;DSIVAELDR;DSIVAELDREMSR;ENDFDRLVLQYAPSA;FGVVLDEIKPSSAPELQAVR;KFGVVLDEIKPSSAPELQAVR;LDRLDLAR;LQDAYYIFQEMADK;LSSPERDVER;LVLQYAPSA;MFADYLAHESR;RDSIVAELDR;WEAAEGLLQEALDK
-6.41431	-6.50585	-6.70284	-6.52201	-6.54827	-6.55227	-0.000148455	0.000564923	5	5	143.09	O14594	NCAN	Neurocan core protein		DFQWTDNTGLQFENWR;ELGGEVFYVGPAR;GIEDEQDLVPLEVTGVVFHYR;QDLPILVAK;VSLPSYPR
1.06472	1.05332	1.11746	1.18827	1.29696	1.15037	-0.133368	1.29765	8	8	16.46	P47813;O14602	EIF1AX;EIF1AY	Eukaryotic translation initiation factor 1A, X-chromosomal;Eukaryotic translation initiation factor 1A, Y-chromosomal		AYGELPEHAK;DYQDNKADVILK;EDGQEYAQVIK;ELVFKEDGQEYAQVIK;GKNENESEKR;INETDTFGPGDDDEIQFDDIGDDDEDIDDI;VWINTSDIILVGLR;YNADEAR
2.82014	2.93239	2.88154	2.82845	3.14449	2.88966	-0.0761811	0.303713	9	7	7.7469	O14610	GNGT2	Guanine nucleotide-binding protein G(I)/G(S)/G(O) subunit gamma-T2		AQDLSEK;AQDLSEKDLLK;EIKEYVEAQAGNDPFLK;EYVEAQAGNDPFLK;GIPEDKNPFK;GIPEDKNPFKEK;MAQDLSEK;MEVEQLK;MEVEQLKK
2.55841	2.55889	2.53906	2.51038	2.59207	2.47991	0.0246687	0.292749	34	34	130.16	O14617	AP3D1	AP-3 complex subunit delta-1		AEGTTYRDELLTK;ALDIDLDKPLADSEK;ALDIDLDKPLADSEKLPIQK;ALDLLYGMVSK;AVFHEEEQR;AVLIMYK;DVPVAEEVSALFAGELNPVAPK;EQAGEAEGAQAVTQLMVDR;GMELSVLDSLNAR;GSLQEDSQVTVAIVLENR;GTLSFIAK;HGHLIAAQMLDVAIR;HRPSEADEEELAR;ILIEDSDQNLK;KGENSVSVDGK;KQEQANNPFYIK;LFGALTPLEPR;LKGTLSFIAK;LLESGDLSMSSIK;LMTHVDK;LMTSSTNNWVLIK;LPQFVQSADLEVQER;LYASILQQK;MSFQNLLAK;NDEGATHEK;NYLSLAPLFFK;QDNIAVK;SPEKDVPMVEK;SSPSPQK;VPGLPMSDQYVK;VTTLPGHI…
1.25502	1.20135	1.15932	1.28178	1.27554	1.43024	-0.123958	1.00901	9	9	29.04	O14618	CCS	Copper chaperone for superoxide dismutase		ESAQPPAHL;FLQLTPER;GGHPLSK;GMGSGQLQNLGAAVAILGGPGTVQGVVR;ITGNSGER;MEDEQLK;SAGLFQNPK;SLIIDEGEDDLGR;VWDVIGR
1.35846	1.43818	1.43301	1.34817	1.55568	1.42884	-0.0343466	0.201678	21	21	87.687	O14639	ABLIM1	Actin-binding LIM protein 1		AIYDIERPDLITYEPFYTSGYDDK;AIYDIERPDLITYEPFYTSGYDDKQER;DYQGLFGVK;DYQTLPDGHMPAMR;EIFGMSIQEFDR;FPAAQAPDPSETPK;HFHVPDQGINIYR;HLAPEVFR;HSYTPTTSR;IETDHWPGPPSFAVVGPDMK;IFPYEMLMVTNR;LNSGLGQLILK;LNSGLGQLILKEEMEK;QLQEEQLMK;QSLGESPR;TLSPTPSAEGYQDVR;VDNEILDYK;VDNEILDYKDLAAIPK;VLEAGDK;VLTGEYISK;YDSPINSASHIPSSK
-2.3191	-2.25467	-2.26392	-2.20078	-2.37334	-2.43191	0.0561145	0.318206	5	3	75.186	O14640;P54792	DVL1;DVL1P1	Segment polarity protein dishevelled homolog DVL-1;Putative segment polarity protein dishevelled homolog DVL1P1		ADPVRPIDPAAWLSHTAALTGALPR;EIVSQTGPISLTVAK;GDGGIYIGSIMK;GGAVAADGR;IIYHMDEEETPYLVK
-0.812038	-0.815521	-0.817419	-0.890156	-0.527295	-0.828056	-0.0664905	0.232943	9	5	78.947	O14641	DVL2	Segment polarity protein dishevelled homolog DVL-2		AELAPPAPPLPPLPPER;AGSSTGGGGVGETK;AMAAPESGLEVR;DIVHKPGPIVLTVAK;FSSSTEQSSASR;GDGGIYIGSIMK;GGAVAADGR;VIYHLDEEETPYLVK;YNFLGISIVGQSNER
-4.88986	-4.73584	-4.74877	-4.77797	-4.67229	-4.81997	-0.0347427	0.202927	9	4	196.69	O14646	CHD1	Chromodomain-helicase-DNA-binding protein 1		ELEPFLLR;GSVEEDILER;LKNDDSLLYK;LLITGTPLQNSLK;LVISHEEELIPLHK;MVLDHLVIQR;QKELEEIYMLPR;RAETHENEPGPLTVGDELLSQFK;VLIFSQMVR
0.199116	0.247066	0.191065	0.184824	0.468457	0.205021	-0.073685	0.325492	19	14	211.34	O14647	CHD2	Chromodomain-helicase-DNA-binding protein 2		AYSDQEHIK;DHHYGDR;DHHYGDRR;DLVEGFTDAEIR;ENEVSTSATDELLSQFK;EYEWIHSQTK;GLNVQEQLEHTR;GTVEEEIIER;ISGVQVNVK;KGAVTGGEEAK;KQPAYLGGENLELR;LKNDDSLLYK;LLITGTPLQNSLK;MVLDHLVIQR;QKELEEIYMLPR;SIPVDPEEK;SQPVLPEAK;STLGQTDFPAHSR;VLIFSQMVR
-2.53746	-2.39456	-2.42031	-2.48889	-2.11328	-2.34953	-0.133544	0.492931	3	3	24.775	O14653	GOSR2	Golgi SNAP receptor complex member 2		ILDIANMLGLSNTVMR;MDPLFQQTHK;YDVQHLQTALR
0.0857773	0.0907497	0.0412769	0.10783	0.288291	0.0232391	-0.0671854	0.349827	6	6	37.808	O14656	TOR1A	Torsin-1A		AMFIFLSNAGAER;DLDDNLFGQHLAK;GYEIDEDIVSR;ITDVALDFWR;LKDIEHALSVSVFNNK;VAEEMTFFPK
-1.45938	-1.29461	-1.51793	-1.36296	-1.24627	-1.52751	-0.0450627	0.160398	3	3	37.978	O14657	TOR1B	Torsin-1B		DLEPVLSVGVFNNK;GSAIDEDIVTR;LFGQHLATEVIFK
-0.332918	-0.251328	-0.157955	-0.356472	-0.110051	-0.468222	0.0641813	0.21237	8	8	37.031	O14662	STX16	Syntaxin-16		AVQALPSR;DLGAMIVEQGTVLDR;ELASLHDK;LTDAFLLLR;QIVQSISDLNEIFR;SIAAELDELADDR;SQHFFDTSVPLMDDGDDNTLYHR;WVDGVDEIQYDVGR
1.29155	1.26987	1.27089	1.34107	1.39823	1.33192	-0.0796372	1.65594	10	10	84.141	O14672	ADAM10	Disintegrin and metalloproteinase domain-containing protein 10		AIDTIYQTTDFSGIR;ATSGDKLNNNK;AVSHEDQFLR;EAVIAQISSHVK;FPNIGVEK;GGTFYVEPAER;LVDADGPLAR;RPPQPIQQPQR;SLNTGIITVQNYGSHVPPK;TLPFHSVIYHEDDINYPHK
-0.495464	-0.499859	-0.625715	-0.586876	-0.436904	-0.551506	-0.0152508	0.0870063	4	4	38.964	O14681	EI24	Etoposide-induced protein 2.4 homolog		ASSVLAQR;AYLFQLR;GIEMHQR;VFIPVLQSVTAR
0.146168	0.131603	0.20467	0.329809	0.396859	0.329659	-0.191295	2.42458	5	5	21.054	O14683	TP53I11	Tumor protein p53-inducible protein 11		HSQTDLVSR;ILGVGGEDDDGEVHR;ISQVLGNEIK;KILGVGGEDDDGEVHR;QPPPLMK
-2.95597	-2.8461	-2.97467	-3.11143	-2.43252	-2.19119	-0.3472	0.552278	7	7	593.38	O14686	KMT2D	Histone-lysine N-methyltransferase 2D		AIFSGISQR;APVAPTPPTLIK;ARPPEEGEDSRPPR;AYQSTFTGETNTPYSK;DIFNEHLR;SQLDILSLLK;VLEEQIGVHR
-6.95745	-6.75323	-6.76226	-6.99069	-6.42428	-6.93233	-0.04188	0.0768337	2	2	59.092	O14730	RIOK3	Serine/threonine-protein kinase RIO3		AASFLKDDGDPPLLYDE;MDLVGVASPEPGTAAAWGPSK
-0.0606499	0.0161934	0.0157375	-0.000537872	0.186208	-0.0634251	-0.0503213	0.252059	5	5	47.484	O14733	MAP2K7	Dual specificity mitogen-activated protein kinase kinase 7		AASSLEQK;DVKPSNILLDER;IDPPDPTKPDYDIR;LLEHSFIK;TGHVIAVK
0.274912	0.321276	0.314692	0.334667	0.438388	0.255156	-0.0391105	0.287168	7	7	35.914	O14734	ACOT8	Acyl-coenzyme A thioesterase 8		HYWVPAK;IAAQEVPIEIKPVNPSPLSQLQR;LFGGQIVGQALVAAAK;LPVLYQVER;RYPLALNR;VKPQVSESK;VKPQVSESKL
1.76626	1.67367	1.80144	1.85899	1.81361	1.80218	-0.0778042	0.864367	5	5	23.539	O14735	CDIPT	CDP-diacylglycerol--inositol 3-phosphatidyltransferase		ALNQGTR;MGLWVTAPIALLK;MIDLSGNPVLR;NMAALDAADR;SLISVIHLITAAR
2.53984	2.43648	2.40668	2.51426	2.62795	2.6943	-0.151171	1.07226	12	12	14.285	O14737	PDCD5	Programmed cell death protein 5		ADEELEALR;ADEELEALRR;AVENYLIQMAR;HGDPGDAAQQEAK;KVSQQTEK;LAELQAK;LSNLALVKPEK;NSILAQVLDQSAR;VSEQGLIEILK;VSEQGLIEILKK;VSQQTEK;YGQLSEK
2.80084	2.72176	2.72602	2.7631	2.87184	2.74443	-0.0435832	0.388259	20	20	72.683	O14744	PRMT5	Protein arginine N-methyltransferase 5;Protein arginine N-methyltransferase 5, N-terminally processed		AAILPTSIFLTNK;AAILPTSIFLTNKK;AAMAVGGAGGSR;DDGVSIPGEYTSFLAPISSSK;DRDPEAQFEMPYVVR;DWNTLIVGK;EFIQEPAK;EKDRDPEAQFEMPYVVR;EWVAPEK;GFPVLSK;GPLVNASLR;KGFPVLSK;LSPWIRPDSK;NRPGPQTR;SDLLLSGR;VPEEEKDTNVQVLMVLGAGR;VPLVAPEDLR;VPLVAPEDLRDDIIENAPTTHTEEYSGEEK;WLGEPIK;YSQYQQAIYK
1.75276	1.78814	1.89873	2.2193	2.21908	2.06329	-0.354012	2.18623	18	18	38.868	O14745	NHERF1	Na(+)/H(+) exchange regulatory cofactor NHE-RF1		AALNAVR;AGLLAGDR;AQEAPGQAEPPAAAEVQGAGNENEPR;EALAEAALESPRPALVR;ETHQQVVSR;GPSGYGFNLHSDK;KGPSGYGFNLHSDK;KNELFSNL;LLVVDPETDEQLQK;LLVVDRETDEFFK;LLVVDRETDEFFKK;LVEPGSPAEK;LVEVNGENVEK;LVEVNGENVEKETHQQVVSR;QHGDVVSAIR;SADAAAGAPLPR;SKPGQFIR;SVDPDSPAEASGLR
-7.60365	-7.40874	-7.29828	-7.60465	-7.11905	-7.86108	0.0913728	0.144222	1	1	47.878	O14763	TNFRSF10B	Tumor necrosis factor receptor superfamily member 10B		DASVHTLLDALETLGER
-1.80262	-1.75401	-1.72603	-1.71902	-1.55981	-1.65321	-0.116874	1.07034	5	5	68.009	O14772	FPGT	Fucose-1-phosphate guanylyltransferase		DPPEVSLR;FLHKPSIEK;GEFWDIVAITAADEK;GTSLNVVVLNNSK;LPNASALGK
3.13197	2.96494	3.00449	3.01766	3.05653	3.04093	-0.00457732	0.0298224	8	8	61.247	O14773	TPP1	Tripeptidyl-peptidase 1		AYPDVAALSDGYWVVSNR;GLTLLFASGDSGAGCWSVSGR;LFGGNFAHQASVAR;LSELVQAVSDPSSPQYGK;LYQQHGAGLFDVTR;VNTELMK;VPIPWVSGTSASTPVFGGILSLINEHR;VVGQQGR
-2.2047	-2.22737	-2.3948	-2.38327	-2.10971	-2.25111	-0.027592	0.0998516	4	4	43.566	O14775	GNB5	Guanine nucleotide-binding protein subunit beta-5		LHDVELHQVAER;VEALGQFVMK;VIVWDSFTTNK;VSILFGHENR
3.43812	3.40503	3.34414	3.39143	3.5639	3.41387	-0.0606349	0.426454	43	43	123.9	O14776;Q5VWI1	TCERG1	Transcription elongation regulator 1		AIVPLEAR;ALLSDMVR;ATFSEFAAK;AVDSSSMR;AVDSSSMREDLFK;DDNKDIDSEK;DREALFNEFVAAAR;EAAMEAEIK;EALFNEFVAAAR;EEAIQNFK;EEPKEEEMTEEEK;EFEEYIR;EFEEYIRDK;ESAWTKPDGVK;FNPGELR;GMEELKK;GPPPPPTASEPTR;GPPPPPTASEPTRR;GVSAFSTWEK;IIQEPPHK;KLIQESDQHLK;KLIVAYVDDLDR;KLIVAYVDDLDRR;KQVFDQYVK;LFNEHIEALTK;LIQESDQHLK;LIQESDQHLKDVEK;LIVAYVDDLDR;LIVAYVDDLDRR;LSMWDRPDDLIGR;QLLDETSAITLTSTWK;REEAIQNFK;RGPPPPPTASEPTR;SDFFELLSNHHLD…
2.54092	2.5868	2.49988	2.54093	2.70841	2.55222	-0.0579856	0.41386	22	15	101.39	O14787	TNPO2	Transportin-2		AHYQSFPPPVADFIK;ALVMLLEVR;ATIGILITTIASK;DDLRDMFYK;DNEEKDSAFR;DQVGEDNWQQFSEQFPPLLK;DSQSPNTATQR;EELLPHLLPLLK;GDVEEDEAVPDSEQDIKPR;GLLFHPEWVVK;ILDGNKR;ILHGFKDQVGEDNWQQFSEQFPPLLK;LAAFYGV;LKSEDEPTR;LMPPLIQK;MDWQPDEQGLQQVLQLLK;NIRDNEEKDSAFR;QSSFALLGDLTK;SLSGLILK;TVTLPHEAERPDGSEDAEDDDDDDALSDWNLR;TVTLPHEAERPDGSEDAEDDDDDDALSDWNLRK;YSEIDIILLK
-1.30564	-1.19115	-1.03856	-1.05576	-1.09367	-1.33664	-0.0164289	0.0480495	2	2	35.773	O14792	HS3ST1	Heparan sulfate glucosamine 3-O-sulfotransferase 1		AHPQVDPK;LIRDPFPEIQK
-1.65655	-1.66509	-1.58394	-1.64385	-1.47955	-1.59802	-0.061389	0.482465	5	3	180.68	O14795;Q8NB66	UNC13B	Protein unc-13 homolog B		ELDLEAADSLK;ESDDFLGQTIIEVR;FELPFDIPEEEAR;SPDLQSLR;TIFGNLNPVWEEK
0.256353	0.286228	0.255402	0.232058	0.3929	0.19042	-0.00579802	0.0312307	18	18	155.64	O14802	POLR3A	DNA-directed RNA polymerase III subunit RPC1		AISTPIITAQLDKDDDADYAR;AQENLNPLVVLNLFK;AVIHIDEQSGK;AVMATHGVK;ESVLMLASFEK;GFSIGIGDVTPGQGLLK;GTLGSGSK;HLIDGDVVLFNR;IDEVAVPVHVAK;ILTFPEK;KQFLDYLK;LLVEGDNLR;LTEIIFLNDVIK;QIFSVILRPSDDNPVR;RPGLTYLQK;RPLIFDTNEFHIPLVT;SLPHFEK;TADHLFDAAYFGQK
-1.52023	-1.26426	-1.4376	-1.62704	-1.01994	-1.55779	-0.00577386	0.00921799	8	8	23.846	O14807	MRAS	Ras-related protein M-Ras		AFHDLVR;ASFEHVDR;ATSAVPSDNLPTYK;FHQLILR;IFVPDYDPTIEDSYLK;LVVVGDGGVGK;SALTIQFFQK;TGDGFLIVYSVTDK
3.43597	3.50606	3.43384	3.42873	3.57536	3.47923	-0.0358184	0.295623	15	15	27.887	O14818;Q8TAA3	PSMA7	Proteasome subunit alpha type-7		AITVFSPDGHLFQVEYAQEAVK;AITVFSPDGHLFQVEYAQEAVKK;ALLEVVQSGGK;DIVVLGVEK;EKEENEK;GRDIVVLGVEK;GSTAVGVR;ILNPEEIEK;KGSTAVGVR;LTVEDPVTVEYITR;LYQTDPSGTYHAWK;NIELAVMR;NYTDEAIETDDLTIK;RPFGISALIVGFDFDGTPR;YVAEIEKEKEENEK
-0.539206	-0.464464	-0.578461	-0.529099	-0.388337	-0.601297	-0.0211325	0.107616	11	11	140.76	O14827	RASGRF2	Ras-specific guanine nucleotide-releasing factor 2		ALSQDDQDDIHLK;AVLESAPADR;GLSSPEQSPGTVEENVDNPR;GSGQVFGHLDFK;HAQDFELNNELK;HQLEDQDTEIER;IFTTAAVVLGK;IVVEPPDAAAFTVVLLAPSR;LKSEIIALNK;RPFTSIPVR;YIHLVQIVETEK
0.299314	0.320871	0.37072	0.346489	0.521737	0.422514	-0.0999448	0.844159	9	9	38.287	O14828	SCAMP3	Secretory carrier-associated membrane protein 3		AQQEFAAGVFSNPAVR;DGGNPFAEPSELDNPFQDPAVIQHRPSR;ELQHAALGGTATR;EPPPAYEPPAPAPLPPPSAPSLQPSR;KLSPTEPK;KQEELNR;NYGSYSTQASAAAATAELLK;TAAANAAAGAAENAFR;TGASFQK
-1.77727	-1.64399	-1.80467	-1.82168	-1.57286	-1.79701	-0.0114609	0.0417813	4	4	38.538	O14832	PHYH	Phytanoyl-CoA dioxygenase, peroxisomal		EVVGIAHK;GDTVFFHPLLIHGSGQNK;GTSQENIEK;VQDFQEDKELFR
1.49048	1.53403	1.42013	1.37243	1.53136	1.5078	0.0110146	0.0642953	20	19	137.46	O14841	OPLAH	5-oxoprolinase		AGDFGAAFVER;AQTGPPR;DLLHIGTQAR;DQPLDSSHIASIR;EEALLSVLTER;EFGFVIPERPVVVDDVR;FHFAIDR;GEAGTGTPVK;GFQGQLK;GKLEGLLSR;GLNLLIR;ILEQEAGMLLPR;ITDPEILESR;KGGPVTVTDANLVLGR;LLSEDPANYADAPTEGIR;LVQGGVFQEEAVTEALR;NLHDNLSDLR;TGDLLEVQQPVDLGALR;YAGEFEHVFEASTAGVTLQAPQLDINTVAAGGGSR
-0.843018	-0.705168	-0.783739	-0.893152	-0.677484	-0.834213	0.0243082	0.116734	3	3	46.36	O14874	BCKDK	Branched-chain alpha-ketoacid dehydrogenase kinase		QLLDDHKDVVTLLAEGLR;SQDGSHLLK;YLQQELPVR
1.70222	1.61601	1.66787	1.83117	1.75513	1.8184	-0.139534	1.81439	4	4	16.516	O14880	MGST3	Glutathione S-transferase 3, mitochondrial		IASGLGLAWIVGR;SGLGSGPK;VLYAYGYYTGEPSK;VLYAYGYYTGEPSKR
-5.0462	-4.74089	-4.99186	-4.81076	-4.72227	-5.08072	-0.0550709	0.142757	2	2	39	O14905	WNT9B	Protein Wnt-9b		ETAFLYAVSSAALTHTLAR;REPGLAETLR
-0.984507	-1.1125	-1.0472	-1.00915	-0.938315	-0.952999	-0.0812483	0.884534	3	3	13.735	O14907	TAX1BP3	Tax1-binding protein 3		RSEEVVR;SYIPGQPVTAVVQR;VSEGGPAEIAGLQIGDK
1.18644	1.24693	1.14164	1.18524	1.38049	1.29542	-0.0953792	0.674264	11	11	36.049	O14908;Q8TF64	GIPC1	PDZ domain-containing protein GIPC1		APPLVENEEAEPGR;DTELAATMVELGK;GGLGVGEPGPLGGGGSGGPQMGLPPPPPALRPR;GPATVEDLPSAFEEK;IEGFTNVK;KAFDMISQR;KAPPLVENEEAEPGR;LVFHTQLAHGSPTGR;NPDELAEALDER;SAGGRPGSGPQLGTGR;VDDLLESYMGIR
1.12857	1.14636	1.41949	1.21338	1.19968	1.04117	0.0800664	0.297605	9	3	25.996	O14910	LIN7A	Protein lin-7 homolog A		AIELLEK;ATVAAFAASEGHSHPR;EQNSPIYISR;GDQLLSVNGVSVEGEHHEK;IIPGGVAER;LQESGEVPVHK;RGDQLLSVNGVSVEGEHHEK;TDEGLGFNVMGGK;VLEEMEAR
-1.47503	-1.65084	-1.53708	-1.63011	-1.52389	-1.64115	0.0440709	0.278516	6	5	86.563	O14920	IKBKB	Inhibitor of nuclear factor kappa-B kinase subunit beta		ALDDILNLK;DLKPENIVLQQGEQR;ELWNLLK;IIDLGYAK;LLLQAIQSFEK;VEEVVSLMNEDEK
-3.26569	-3.1141	-3.20217	-3.32428	-0.737987	-3.15762	-0.787362	0.397884	5	5	21.943	O14925;Q5SRD1	TIMM23	Mitochondrial import inner membrane translocase subunit Tim23		ETQNMAWSKPR;GAEDDLNTVAAGTMTGMLYK;GSLLQQSL;MEGGGGSGNK;YLVQDTDEFILPTGANK
-1.67348	-1.55911	-1.5982	-1.71722	-1.19585	-1.54764	-0.123363	0.322051	5	5	49.54	O14929	HAT1	Histone acetyltransferase type B catalytic subunit		AGFGAMEK;LLVTDMSDAEQYR;TFFPEYTHQLFGDDETAFGYK;VSQMLILTPFQGQGHGAQLLETVHR;YYTEFPTVLDITAEDPSK
-5.92698	-5.94498	-6.02122	-6.0541	-5.94202	-5.95536	0.0194337	0.159751	2	2	17.769	O14933	UBE2L6	Ubiquitin/ISG15-conjugating enzyme E2 L6		ELEDLQK;MDLADLLTQNPELFR
2.10651	2.0864	2.09441	2.07171	2.29139	2.10449	-0.0600901	0.365588	26	26	105.12	O14936	CASK	Peripheral plasma membrane protein CASK		ADAGFVYSEAVASHYMR;DDHNWWQGK;EINGISVANQTVEQLQK;ENSAPVK;ESDILQR;ETGQQFAVK;FAYPIPHTTRPPK;FNSFYGDPPEELPDFSEDPTSSGLLAAER;FTSSPGLSTEDLK;FTSSPGLSTEDLKR;GAVLAAVSSHK;HNAVFDQLDLVTYEEVVK;IHEQGLIAILDVEPQALK;IHLPETVEQLR;IHLPETVEQLRK;ITVYEALNHPWLK;KIHEQGLIAILDVEPQALK;LFEGIIK;MLMLDPAER;NPPSDAVQR;NTDEPMGITLK;QGTLHVGDEIR;TAEFAPFVVFIAAPTITPGLNEDESLQR;TLVLLGAHGVGR;VGDIIQIISK;VGTPHFMAPEVVK
1.71197	1.6852	1.71398	1.75434	1.75062	1.74537	-0.046394	2.06802	6	6	9.9062	O14949	UQCRQ	Cytochrome b-c1 complex subunit 8		AYPHVFTK;EFGNLTR;GIPNVLR;HVISYSLSPFEQR;KNPAAYENDK;NPAAYENDK
3.50324	3.4361	3.42541	3.40953	3.54844	3.52622	-0.0398111	0.331391	10	10	19.794	P19105;O14950;P24844	MYL12A;MYL12B;MYL9	Myosin regulatory light chain 12A;Myosin regulatory light chain 12B;Myosin regulatory light polypeptide 9		ATSNVFAMFDQSQIQEFK;DGFIDKEDLHDMLASLGK;EAFNMIDQNR;EAPIDKK;ELLTTMGDR;ELLTTMGDRFTDEEVDELYR;FTDEEVDELYR;GNFNYIEFTR;KGNFNYIEFTR;LNGTDPEDVIR
-3.04384	-2.89832	-3.16346	-3.42589	-2.43445	-2.48958	-0.251899	0.310993	3	3	46.435	O14958	CASQ2	Calsequestrin-2		AFEEAAEHFQPYIK;FFATFDK;SDPDGYEFLEILK
2.59613	2.52552	2.51606	2.55553	2.69937	2.62164	-0.079608	0.751876	20	20	86.191	O14964	HGS	Hepatocyte growth factor-regulated tyrosine kinase substrate		AAEEAER;AEPMPSASSAPPASSLYSSPVNSSAPLAEDIDPELAR;ALQNAVTTFVNR;ATSTTELPPEYLTSPLSQQSQLPPK;DETALQEEEELQLALALSQSEAEEKER;ESDAMFAAER;GALSALR;GALSALREEHR;KQEYLEVQR;LQEQEKER;LYYEGLQDK;QEYLEVQR;QIQLAQK;QTMEELKDLLK;RDETALQEEEELQLALALSQSEAEEKER;STYTSYPK;VEGHVFPEFK;VNDKNPHVALYALEVMESVVK;VQFGVMTR;VVQDTYQIMK
-3.32952	-3.37653	-3.29218	-3.18904	-3.24372	-3.29375	-0.0905736	1.09596	3	2	23.155	O14966;P57729	RAB29	Ras-related protein Rab-7L1		LQLWDIAGQER;VLVVGDAAVGK;WKQDLDSK
2.618	2.62962	2.66152	2.84004	2.74448	2.68347	-0.119613	1.18668	20	20	70.038	O14967	CLGN	Calmegin		AALEKPMDLEEEK;EIEDPNDKKPEEWDER;ENQVPGDR;EVADHWAADGWR;GSLLEDVVPPIKPPK;GVLEQEEK;GVLEQEEKEEK;GVWRPPLVDNPNYQGIWSPR;HAKPPDVDLK;HAKPPDVDLKK;HKDTEYK;IMIANANKPGVLK;LAGWVLSK;LLADTDDLILENFYDK;TGVFEEK;TPQPIGEVYFAETFDSGR;TSYIIMFGPDK;WEIEELK;WEIEELKENQVPGDR;YKTPQPIGEVYFAETFDSGR
-0.701	-0.665537	-0.711571	-0.662914	-0.414096	-0.586695	-0.138134	0.857174	5	4	33.01	O14972	VPS26C	Vacuolar protein sorting-associated protein 26C		FTPSPVDFTITPETLQNVK;GLSVPIYMVFPR;GTALDIK;TEIPFEFPLHLK
2.63442	2.54411	2.52814	2.56927	2.79064	2.67762	-0.110288	0.698598	28	28	115.28	O14974	PPP1R12A	Protein phosphatase 1 regulatory subunit 12A		DDSTDFKK;DTAGVTR;EEEKEGEDK;EKDTAGVTR;ESETSREDEYK;ETLIIEPEK;ETQTDSISR;FPTTATK;GYTEVLK;ISEMEEELK;ITTGSSSAGTQSSTSNR;KESETSREDEYK;KFPTTATK;LASTSDIEEKENR;LAYVAPTIPR;LEKDDSTDFKK;LSSSLDNKEK;LYEQILAENEK;NKETLIIEPEK;QGVDIEAAR;SGGTALHVAAAK;SGSYSYLEER;STQGVTLTDLQEAEK;SYLTPVRDEESESQR;TYDETYQR;WEDDLKK;WIGSETDLEPPVVK;YETSSTSAGDRYDSLLGR
-4.67619	-4.70996	-4.61712	-4.75879	-4.44514	-4.65467	-0.0482257	0.192271	1	1	70.311	O14975	SLC27A2	Long-chain fatty acid transport protein 2		DALYFLDDTAK
1.1218	1.10386	1.09843	1.09935	1.24134	1.10903	-0.0418768	0.379556	23	23	143.19	O14976	GAK	Cyclin-G-associated kinase		AAGQPYEQHAK;ALLSTLHTVLWDGESR;ALVEEEITR;APSFAQKPK;AVLAVHPDK;AVQHMHR;AVVMTPVPLFSK;DLKVENLLLSNQGTIK;DQSDFVGQTVELGELR;EEQQDILSK;FGKPELPR;GDLDISYITSR;GQLVEFLK;LLDWIEGK;LLSNEEEK;LSIAEVVHQLQEIAAAR;QHPFEDGAK;TPEIIDLYSNFPIGEK;VASTSQEYDK;VIQSVANYAK;VLAEGGFAFVYEAQDVGSGR;VSENDFEDLLSNQGFSSR;WTPVGMADLVAPEQVK
3.25965	3.1613	3.14191	3.20862	3.32471	3.32326	-0.0979071	0.859052	19	17	46.437	O14979;REV__Q8N0S2	HNRNPDL	Heterogeneous nuclear ribonucleoprotein D-like		DAASVDK;DLTEYLSR;EHKLDGK;EYFGAFGEIENIELPMDTK;GFCFITYTDEEPVKK;GFGFVLFK;HVTAQQPSR;KDLTEYLSR;KVFVGGLSPDTSEEQIK;LAGGAAIK;LSHVPPPLFPSAPATLASR;MFIGGLSWDTSK;MFIGGLSWDTSKK;NQQDDGK;QLAPLLPSLAPSSAR;QQQQQQK;SAAAAAATR;VFVGGLSPDTSEEQIK;YHQIGSGK
3.38928	3.3865	3.37808	3.42192	3.54573	3.48812	-0.100639	1.31204	33	33	123.38	O14980	XPO1	Exportin-1		AIIASNIMYIVGQYPR;AVGHPFVIQLGR;DFEEYPEHR;DFLVQIK;DTDSINLYK;EFAGEDTSDLFLEER;EFMKDTDSINLYK;EHDQLIEK;EHLRDFLVQIK;EHPDAWTR;EPEVLSTMAIIVNK;ETLVYLTHLDYVDTER;FLNVPMFR;FLVTVIK;HWPTFISDIVGASR;IYLDMLNVYK;LISGWVSR;LISTLIYK;LLSEEVFDFSSGQITQVK;LNMILVQILK;MAKPEEVLVVENDQGEVVR;MAQEVLTHLK;NVDILKDPETVK;QLGSILK;QLLDFSQK;QLYLPMLFK;QMLPLNTNIR;SAFPHLQDAQVK;SNDPQMVAENFVPPLLDAVLIDYQR;VDTILEFSQNMNTK;YMLLPNQVWDSIIQQATK;YVV…
0.367458	0.407156	0.511852	0.296911	0.378245	0.347828	0.0878274	0.827946	22	22	206.89	O14981	BTAF1	TATA-binding protein-associated factor 172		AAAQQLGEVVK;AAFAITSR;AQIADLPAGSSGNILVELDEAQKPYLVQR;ATGHVFQALQYLR;DAVETNEK;EQEAGVLAMDALHR;EVLQEYIAGADTIMEDPATR;EYLNPLHYTGPPTER;FGDFVSDEVVAPVR;GAEFALTTIVK;GIITLYR;HFLEQLLDGK;IAAGQAVEAIVK;IIEGLQDLDDDVR;KAAAQQLGEVVK;LFILLDTGTTPVTR;LHPHELNNLLSK;LLTQEQWEVR;LPHLWDAMVGPLR;QPTLQAAELIDSEFR;TVDVLLK;VLPWLGAIDDSVK
-4.34092	-4.20791	-4.26396	-4.27892	-3.97433	-4.3595	-0.06668	0.209145	6	6	151.61	O15013	ARHGEF10	Rho guanine nucleotide exchange factor 10		APDGSWDSEPQK;FIVLATALHEK;LFHTETLK;LQHFFTPEK;SEDSTIYDLLKDPVSLR;YILGSVVDSEK
-0.247366	-0.197447	-0.221764	-0.271732	0.0622988	-0.219639	-0.079168	0.308159	8	8	151.19	O15014	ZNF609	Zinc finger protein 609		AKEPGADPAK;ALDILQQHASHYK;ASPSSANK;DTSKPTPGTSLFTPSEGAASK;EVGIPAPNAVATLPDNIK;GTSNSSK;SGDGANAGGLVAAIAPK;SLSSGASGGK
4.45621	4.44988	4.44485	4.46436	4.59744	4.43338	-0.0480833	0.40411	97	85	271.32	O15020	SPTBN2	Spectrin beta chain, non-erythrocytic 2		AAELQAQWER;AASAGVPYHGEVPVSLAR;AKDELSAQAEVK;ALADEREAVQK;ALAQEDQGAGEVER;ALAVEGK;ALGAAAAGPELAELQEMWK;ALGEEVTR;AQGSVAFDYR;AQSEYSR;ATVAEWK;AVSASALR;AYAGDKAEEIGR;DEAEMSSWLR;DGLAFNAIVHK;DLEAIAAR;DLNAAEALQR;DLPSVQLLMK;DLTGALR;DLTSVNILLK;DTSTIGQER;DVEDEILWVTER;DVSSADLVIK;EANALAAGHPAQAVAINAR;EESLGEAR;EIQGHEPR;EKEVEAIQAQAK;ELDDLEQWIQER;ELTLEKPELK;EQAAALPPTLSR;EQQHLLASADTGR;ETWLSENQR;EVQTGWEDLR;EVVAASHELGQDY…
2.38844	2.38095	2.38987	2.37709	2.56423	2.44215	-0.0747385	0.610477	32	32	251.89	O15027	SEC16A	Protein transport protein Sec16A		ADSGPTQPPLSLSPAPETK;AFPGPLAK;ANVVGEVR;AQQELVPPQQQASPPQLPK;ASHSSERPPPR;DAQGQPGLER;DDTHKVDVINFAQNK;EGPAAAR;EHSAFGDRPEK;EKPEEESLAAPTWLVHLQQVER;ELLLYGR;FATNEAIQR;FGPGGQLIK;GGIGASENLENPPK;GLANPEPAPEPK;HLLQEAR;KNQWVNLNEPEEEK;KTEAYLPDDKNK;LLPSAPQTLPDGPLASPAR;LVLIGSNHSLPFLK;NEHRPASALVNPLAR;QALQSTPLGSSSK;QGYPEGYYSSK;SEPALAPADFVAPLAPLPIPSNLFVPTPDAEEPQLPDGTGR;SIVWDEK;SIVWDEKK;SPDPGIVPQEAPVGNSLSELSEENFDGK;SV…
2.96819	2.96685	2.93698	2.95777	3.08296	2.92088	-0.0298643	0.234209	38	37	205.12	O15031	PLXNB2	Plexin-B2		AANPDYR;AEEASHWLWSR;AHTDSLNTLVALHQLYQYTQK;AITEIYLTR;AMTLQEAEAFVGAER;DGATLILSK;DGDKDVMITGK;DLVLSGDLGSLYAMTQDK;DTTHNLPEFIVK;EAFEAYTDHATYK;EASPNPEDGIVR;FWVNILK;GPVDAVQK;GSSLHVGSDLLK;HALLEEENR;HNIQDEDTIHIWK;IIDQVYR;IQPETGPLGGGIR;LDIPEPR;LFYEDGSGEK;LQLEQQVATGPALDNK;LQLEQQVATGPALDNKK;LQQIAAALENK;MVEDYYK;QMVQVSDQDMNTHLAEISR;RSETVVER;SFASGGR;SFVASNDEGVATVGLVSSTGPGGDR;SQLEGLEESVR;SQLEGLEESVRDR;VFFLPSK;VGV…
-5.60944	-5.50041	-5.58145	-5.391	-5.20268	-5.46942	-0.209399	1.14991	2	2	94.222	O15033	AREL1	Apoptosis-resistant E3 ubiquitin protein ligase 1		ALFDTTNQLFTR;YFETDDPEFYK
-8.16095	-8.18572	-8.17361	-8.30525	-7.32808	-8.04852	-0.279475	0.405004	5	5	74.533	O15037	KHNYN	Protein KHNYN		ESHFLQK;EVALRPQSVGGGAR;GFAEHGK;LAEETDGIIVSNDQFR;RQLLEVFWGQDHK
-0.499321	-0.558935	-0.567566	-0.604824	-0.365403	-0.548405	-0.03573	0.180312	13	13	153.85	O15040	TECPR2	Tectonin beta-propeller repeat-containing protein 2		ASISEPVTFR;DAFAGGVKPFELHPR;EIPISER;GSQPLSQR;ISSRPEGLTSTVR;LDLSQLGAVK;LPGATVSETR;RFDVTGIHK;SLLFYTEEK;VAVFQLVSSLPGR;VHVQQAEK;VLLVSTLQR;WAFVLASAAPTK
-5.83063	-5.70871	-5.92826	-6.05079	-5.31199	-6.02883	-0.0253337	0.0341305	3	3	89.227	O15041	SEMA3E	Semaphorin-3E		ALEAENNAHAIYTR;EFLQLIGYSNFQR;VGYHLEDPLFHLESPR
2.41081	2.37458	2.28791	2.34061	2.63112	2.41208	-0.103504	0.473923	26	26	118.29	O15042	U2SURP	U2 snRNP-associated SURP motif-containing protein		AAAEIYEEFLAAFEGSDGNK;ADKTPGGSQK;AWEDWAIYPEPFLIK;EINNPMFR;FEPPQSDSDGQR;FGPLASVK;FLFENQTPAHVYYR;FQDELESGK;GALKEEQR;GGVVNAAKEEHETDEK;KEQEELK;KPGQSFQEQVEHYR;LYLVSDVLYNSSAK;LYSILQGDSPTK;NLLALIHR;NPPNQSSNERPPSLLVIETK;QIQEERDER;SLDDDLDGVPLDATEDSK;SLDDDLDGVPLDATEDSKK;SNLELFKEELK;TIQGHLQSENFK;TLSQAIVK;VANASYYR;VVIPTER;WEAVDESELEAQAVTTSK;YSEMSEEKR
-3.64765	-3.47498	-3.52001	-3.66009	-3.30919	-3.56174	-0.0372054	0.11598	7	7	186.03	O15047;Q9UPS6	SETD1A	Histone-lysine N-methyltransferase SETD1A		EVPVPTPAPVEVPVPER;KYGEVEEVEILLHPR;LIVDPALDPALR;RPQDGPR;VDHDTIIDATK;VLFTSTR;YIPVEDLQDPR
3.7955	3.80308	3.90657	3.93302	3.93401	3.84296	-0.0682777	0.660069	69	68	172.87	O15061	SYNM	Synemin		AALEALLGR;AASLTMHFR;AELQELNAR;ASAGEGDQAHR;ATGPAAPPPR;AVESVVR;AVSSQTNVR;DGAVGEK;DKVAAGASESTR;DYQDLLQVK;EALGLEQLR;EGLWAEGQAR;EGQGGPGSVSVDVK;EIIFQGPISAAGK;ELEEALR;ELEEALRR;ELERENLLLEEELR;ELQEALGAR;ENLLLEEELR;ETVQLYEDEVR;ETVQLYEDEVRELEEALR;EVHDSYALLVAESWR;EVPISLEVSQDR;EVPISLEVSQDRR;EVPVYIGEDSTIAR;GFLGSGYSSSATTQQENSYGK;GLDAAHER;GLQTPVK;GRLDAELGAQQR;GSQTGTSIGGDAR;HIAPGPK;HISIGPQR;IPHEFHTSMK;LCAQEAEALRR…
2.78294	2.74522	2.74185	2.78784	2.82869	2.73399	-0.0268367	0.369027	30	28	85.124	O15066;O14782	KIF3B	Kinesin-like protein KIF3B;Kinesin-like protein KIF3B, N-terminally processed		AEIHDLQEEHIK;AEIHDLQEEHIKER;AENIVLLELDMPSR;AFFDEEEDHWK;AIVEDHSLVAEEK;ASYLEIYQEEIR;ASYLEIYQEEIRDLLSK;DLSSFVTK;DYEGPAIAPK;EFQEEIAR;EIEHVMNVGNQNR;EKDAAEMLGAK;ERPDTGVYVK;ETYSSLQQEVDIK;GTAHEMPK;GVIPNSFDHIFTHISR;HLIIENFIPLEEK;LGQVSVK;LLQDSLGGNAK;LNLVDLAGSER;NIVDHTNEQQK;QELEQTQNELTR;RPVSAVGYK;RQEIAEQK;SQNQQYLVR;STHIPYR;SVGATNMNEHSSR;TFTFDAVYDWNAK;TVMVANVGPASYNVEETLTTLR;VNEDPKDALLR
2.16667	2.14772	2.19737	2.15796	2.36554	2.20543	-0.0723906	0.489271	28	28	144.73	O15067	PFAS	Phosphoribosylformylglycinamidine synthase		AFSITQGLLK;ALWEETSFQLDR;ANQELGLALDSWDLDFYTK;ATGLGPVDR;DFLTHVSAR;EAPEPGMEVVK;ELSDPAGAIIYTSR;EPGGPSPR;ESWLLPGSNDLLLEVGPR;FGEPVLAGFAR;FLRPEDPTRPSR;FQLGDPTLNALEIWGAEYQESNALLLR;FQQQQGLR;GDPEMEQK;GHLLYVALSPGQHR;GQLHVDGQK;GVAFVGGFSYADVLGSAK;GWAAAVTFHPR;HLAVMPHPER;KPPMLQPLALPPGLSVHQALER;LPAVASK;LSFAHPPSAEVEAIALATLHDR;NPSTVEAFDLAQSNSEHSR;RFQELQR;SLGLQLPDGQR;VGGPVYR;VGPGPALMLR;VGTETVR
0.381176	0.432938	0.35236	0.451223	0.553494	0.343191	-0.0604785	0.391813	17	17	128.11	O15068	MCF2L	Guanine nucleotide exchange factor DBS		AILDAASQK;ALSLDGEQLIGNK;AVLFCKK;DLASFEEK;EEVYIVQAPTPEIK;EGHSVLESLR;ELQAEGSEPSVNQDQLDNQATVQR;EYESILNQDLMEHVR;FLETGAENK;GSAGEEEESLAILR;HFEQGFR;HLFLHEK;HVMSELLDTER;HYAVDSIRPK;LLAQLNETEAAFDEFWAK;LSLDSYLLKPVQR;YTVVADHEK
-1.92537	-1.98925	-1.89845	-2.11217	-1.82549	-1.98874	0.037776	0.162747	5	5	161.1	O15069	NACAD	NAC-alpha domain-containing protein 1		AELLLPEADRPGPR;GLQAQDGTVSWAVEAAPQTSDR;IEDLSQQVHK;KPVAAATIVPR;SPASDTYVVFGEAK
3.61966	3.52852	3.49305	3.52231	3.68599	3.59857	-0.0552149	0.384134	29	26	82.223	O15075	DCLK1	Serine/threonine-protein kinase DCLK1		AQPAPPELNSESEDYSPSSSETVR;AVSSLATAK;DASGMLYNLASAIK;DIKPENLLVYEHQDGSK;DMELEHFDER;DMELEHFDERDK;EHMIQNEVSILR;ELITMMLLVDVDQR;ENKDFIRPK;FSAVQVLEHPWVNDDGLPENEHQLSVAGK;GGDLFDAITSTNK;GIVYAISPDR;GKEHMIQNEVSILR;GSPSEVR;HFNTGPKPNSTAAGVSVIATTALDKER;KTAHSFEQVLTDITDAIK;LDSGVVK;LYTLDGK;NVNPNWSVNVK;SFEALLADLTR;SSQHGGSSTSLASTK;TAHSFEQVLTDITDAIK;TIGDGNFAVVK;TIYTIDGLK;TIYTIDGLKK;TLQTLSSEK;TLQTLSSEKK;TLSDNVNLPQGVR;YL…
-1.32705	-1.27984	-1.31524	-1.29705	-1.23284	-1.37537	-0.00562827	0.0440791	7	5	112.96	O15084	ANKRD28	Serine/threonine-protein phosphatase 6 regulatory ankyrin repeat subunit A		DKNWQTPLHIAAANK;DQPSLVQAIFNGDPDEVR;GANINAFDKK;LLSSGFDIDTPDDFGR;TPLDLAAFK;WLTPLHR;YGHELLINTLITSGADTAK
0.207598	0.224871	0.163387	0.188032	0.421472	0.147928	-0.0538588	0.24385	19	19	167.7	O15085	ARHGEF11	Rho guanine nucleotide exchange factor 11		AQSAPDKDK;ASNPLAAEFK;DIWNIFLEK;DQHGFGFTVSGDR;DVVAGLTQR;EIDRQEVINELFVTEASHLR;EPAQQGPTPSR;KAEVAGSK;LGPPQIYELVALTSSDK;LNAVLIR;LREEGPIIK;QEVINELFVTEASHLR;QLAALGDILSK;RLDATALER;TLGLGSLYGENDLLDLDGDPLRER;VLDLIFYQR;VVPALPESGQSEPGPPEVEGGTK;WLPFFPK;YPLLLESIIK
-2.22806	-2.07907	-2.19921	-2.18357	-1.96933	-2.03341	-0.106676	0.612376	6	5	141.42	O15090	ZNF536	Zinc finger protein 536		AHSEEDVPILIPETTSK;ASLFIRPDILR;DLGLSNMISSLDSASEK;FKEPWFLK;KGEEDGLHVGLDER;LLHELEER
-2.06471	-1.88608	-1.95871	-1.90856	-1.62453	-1.94715	-0.143088	0.555342	3	3	67.315	O15091	PRORP	Mitochondrial ribonuclease P catalytic subunit		AFFDFGK;ESQLLLNVVSQLAK;GLIHSDR
-3.20857	-3.19604	-3.14272	-3.1872	-2.96279	-2.5916	-0.268578	0.70049	9	8	84.639	O15111	CHUK	Inhibitor of nuclear factor kappa-B kinase subunit alpha		AAMLSLLR;DLKPENIVLQDVGGK;ESQILSLLSDIGSGIR;ETGINTGSQELLSETGISLDPR;GGPVDLTLK;IIDLGYAK;IIDLLPK;IISFLLPPDESLHSLQSR;IQLPIIQLR
-2.08688	-1.84766	-1.89457	-2.02802	-1.63208	-2.11109	-0.0192995	0.0397779	2	2	15.179	O15116	LSM1	U6 snRNA-associated Sm-like protein LSm1		MNYMPGTASLIEDIDKK;TLIGFLR
-0.84277	-0.986906	-0.89077	-0.864326	-0.889049	-0.972143	0.00169086	0.0104222	6	6	142.17	O15118	NPC1	NPC intracellular cholesterol transporter 1		DNLQLPLQFLSR;DVEAPSSNDK;EFINFVK;EYFDQHFGPFFR;FLPMFLSDNPNPK;LQGETLDQQLGR
-2.54253	-2.49344	-2.32898	-2.4402	-2.18119	-2.61501	-0.0428508	0.109432	2	2	37.866	O15121	DEGS1	Sphingolipid delta(4)-desaturase DES1		EDFEWVYTDQPHADR;VLYDFVMDDTISPYSR
2.25984	2.20382	2.34698	2.26468	2.40789	2.21713	-0.0263586	0.137404	16	16	37.92	O15126	SCAMP1	Secretory carrier-associated membrane protein 1		AAELDRR;AQQEFATGVMSNK;DPSVTQVTR;EHALAQAELLK;EHALAQAELLKR;EMQNLSQHGR;KAAELDRR;KVHGLYR;MPNVPNTQPAIMKPTEEHPAYTQIAK;NVPPGLDEYNPFSDSR;RQEELER;SDFDSNPFADPDLNNPFK;SDFDSNPFADPDLNNPFKDPSVTQVTR;TPPPGGVK;TTGASFEK;TVQTAAANAASTAASSAAQNAFK
0.472673	0.447849	0.47489	0.414165	0.691358	0.524235	-0.0781151	0.409258	4	4	36.648	O15127	SCAMP2	Secretory carrier-associated membrane protein 2		AASSAAQGAFQGN;ELQNTVANLHVR;QQEELDRK;TGASFQQAQEEFSQGIFSSR
-3.03772	-3.05645	-2.7756	-2.98999	-2.94193	-3.19759	0.0865806	0.292308	7	1	60.666	O15131	KPNA5	Importin subunit alpha-6		EAAWAITNATSGGTPEQIR;EPNPPIDQVIQKPGVVQR;IEFLQSHENQEIYQK;KEAAWAITNATSGGTPEQIR;LVELLMHNDYK;REEQLFK;VVSPALR
1.37488	1.3389	1.21263	1.22845	1.41199	1.25216	0.0112696	0.0511122	8	8	40.949	O15143	ARPC1B	Actin-related protein 2/3 complex subunit 1B		ASSEGGTAAGAGLDSLHK;EVEERPAPTPWGSK;FAVGSGSR;IFSAYIK;NAYVWTLK;SLESALK;TWKPTLVILR;WAPNENK
3.09945	3.02335	2.99047	3.01236	3.16192	3.02475	-0.0285889	0.189316	20	20	34.333	O15144	ARPC2	Actin-related protein 2/3 complex subunit 2		ARPDAEK;ARPDAEKK;ASHTAPQVLFSHR;AVIHYRDDETMYVESK;DDETMYVESK;DNTINLIHTFR;DSIVHQAGMLK;DTDAAVGDNIGYITFVLFPR;DYLHYHIK;ELQAHGADELLK;ELQAHGADELLKR;EPPLELK;EPPLELKDTDAAVGDNIGYITFVLFPR;HTNASAR;IIEETLALK;MILLEVNNR;VFMQEFK;VTVVFSTVFKDDDDVVIGK;YFQFQEEGK;YFQFQEEGKEGENR
2.67341	2.55528	2.51021	2.65194	2.66556	2.67515	-0.0845849	0.795337	8	8	20.546	O15145	ARPC3	Actin-related protein 2/3 complex subunit 3		AYLQQLR;DTDIVDEAIYYFK;ETKDTDIVDEAIYYFK;LIGNMALLPIR;PAYHSSLMDPDTK;QEDEVMR;SLSGPGQ;VFDPQNDKPSK
-1.89385	-1.82236	-1.79914	-1.92463	-1.68339	-1.98541	0.026028	0.0964851	2	2	13.289	O15155	BET1	BET1 homolog		LLAEMDSQFDSTTGFLGK;SLSIEIGHEVK
-6.41966	-6.5227	-6.37227	-6.65831	-6.29982	-6.66148	0.101657	0.326541	1	1	58.026	O15156	ZBTB7B	Zinc finger and BTB domain-containing protein 7B		ANHLVPEVPTVPAHPLTYEEEEVAGR
-1.13776	-1.222	-0.905066	-1.02706	-1.25867	-1.22513	0.0820106	0.276361	9	9	39.249	O15160	POLR1C	DNA-directed RNA polymerases I and III subunit RPAC1		AASQAVEEMR;DSSDPNELYVNHK;FLDELDAVQMD;FSPVATASYR;ILLAEVPTMAVEK;LGLIPIHADPR;LLPDITLLEPVEGEAAEELSR;VLVYNNTSIVQDEILAHR;VVLGEFGVR
-0.963472	-0.789152	-0.903572	-0.928814	-0.508941	-0.812134	-0.135436	0.428206	10	10	116.83	O15164	TRIM24	Transcription intermediary factor 1-alpha		ALLHQLESLAK;AVAAAAAASAAASGGPSAAPSGENEAESR;DTTEVPSSTVEK;FPTQISLAQLR;HIIDNFFVK;IIEVNQNQK;LENYFEELLK;QVEQDIK;VIIDTLITK;WAVSSGSSTALLYSK
2.46167	2.44541	2.46012	2.55813	2.61872	2.60164	-0.137098	2.72886	11	11	23.818	O15173	PGRMC2	Membrane-associated progesterone receptor component 2		AAGDGDVK;DALRDEYDDLSDLNAVQMESVR;DFSLEQLR;EWEMQFK;FYGPAGPYGIFAGR;GLGAGAGAGEESPATSLPR;ILLAVNGK;LLKPGEEPSEYTDEEDTK;LLKPGEEPSEYTDEEDTKDHNKQD;RDFSLEQLR;RGLGAGAGAGEESPATSLPR
-0.599478	-0.499125	-0.492308	-0.620703	-0.283319	-0.62726	-0.0198762	0.0579029	9	9	83.548	O15211;Q12967	RGL2	Ral guanine nucleotide dissociation stimulator-like 2		DSAVASEYELVQLLPGER;EFAVLSELR;ELLVQEVK;GGGVVPYLGTFLK;GVGGGSADLIR;GYNLQPDHDIQR;LESFLLQTGYAAGK;SILVTSQDK;WLQGLRPLTEAQSHR
-0.486	-0.50453	-0.552767	-0.476578	-0.32265	-0.392223	-0.117282	1.13141	11	11	14.582	O15212	PFDN6	Prefoldin subunit 6		AGAPGKA;EELALLDGSNVVFK;ETLAQLQQEFQR;KLQGEVEK;LDYITAEIK;LEAQLTENNIVK;LLGPVLVK;LQGEVEK;RLDYITAEIK;RLDYITAEIKR;RYESQLR
-3.12607	-3.08005	-3.14911	-3.12261	-2.87004	-3.21653	-0.0486828	0.175054	6	6	68.07	O15213	WDR46	WD repeat-containing protein 46		ALAEVDVISLEQGK;ALAEVDVISLEQGKK;FLHSEALLAVAQNR;GHVAALDWVTK;GTYQPLSTR;LEVAEAEEEETSIK
0.791496	0.7561	0.751251	0.80662	0.844234	0.822571	-0.0581923	1.5958	10	10	25.704	O15217	GSTA4	Glutathione S-transferase A4		EVVNMAQK;FLEPGSK;KKPPPDEIYVR;KPPPDEIYVR;LQDGNHLLFQQVPMVEIDGMK;LSNIPTIK;SILHYIADK;TVYNIFRP;WVLAAAGVEFDEEFLETK;YFPVFEK
-1.01171	-0.911741	-0.888281	-0.940319	-0.765027	-1.14868	0.0140963	0.0409394	6	6	77.187	O15228	GNPAT	Dihydroxyacetone phosphate acyltransferase		AIQEHPVVLLPSHR;DILVTEK;EEVSEILDEMSHK;ESLQSVDVLR;EVFDTYLVPISISYDK;KWDEFEDILEER
1.57624	1.68355	1.43552	1.41019	1.67625	1.34612	0.0875839	0.284903	32	32	399.73	O15230	LAMA5	Laminin subunit alpha-5		AGALLPAIHEQLR;AHPASNAIDGTER;AIEASNAYSR;AIQVFLLGGSR;AVAAEAQDTATR;AVPLQPPPPLTSASK;DLGAPQAAAEAELAAAQR;DQASQLLAGTEATLGHAK;DTLASVFR;EAQELNSR;FFLHGVTLVPIEEFSPEFVEPR;FPKPPQPIILR;FYLQGPEPEPGQGTEDR;GFGEPFVLNPGTWALR;GLLLFTAR;GPPPELQPQPEGPPR;GQDLGQAVLDAGHSVSTLEK;GQLQLVEGNFR;HVPEAVPEAFPELYWQAPPSYLGDR;ILLVTDGAR;LAASLDGAR;LAQHEAGLMDLR;LLHSLDQAK;LLHSLDQAKEELER;QEVGVAVHTPQR;RFEQELR;STGDPWLTDGSYLDGTGFAR;TLPQLLAK;…
-1.86946	-1.82173	-1.99049	-1.8799	-1.6388	-2.00465	-0.0527767	0.168005	3	3	76.277	O15234	CASC3	Protein CASC3		GLFFEHDLR;GQTQEEEVRPK;KGLFFEHDLR
-1.50291	-1.64685	-1.60401	-1.48477	-1.58939	-1.44261	-0.0790002	0.576465	2	2	15.173	O15235	MRPS12	Small ribosomal subunit protein uS12m		KLGPTEGRPQLK;LGPTEGRPQLK
-1.51388	-1.48292	-1.49514	-1.5135	-1.29723	-1.44586	-0.0784464	0.536392	5	5	77.628	O15254	ACOX3	Peroxisomal acyl-coenzyme A oxidase 3		ADGELYK;ASTVEGGDTALLPEFPR;ELALFTEGEGMLR;SVDFLDAYPGILDQK;TIFSALENDPLFAR
-0.314875	-0.184832	-0.177616	-0.292557	0.229142	-0.0606194	-0.184429	0.513945	6	6	22.958	O15258	RER1	Protein RER1		LGQIYQSWLDK;QNEEFRPFIR;SEGDSVGESVHGKPSVVYR;STPYTAVR;VDPSLMEDSDDGPSLPTK;YIPFTHGK
0.367197	0.29027	0.308945	0.435396	0.535785	0.582941	-0.195903	1.78314	5	5	30.394	O15260	SURF4	Surfeit locus protein 4		GQNDLMGTAEDFADQFLR;LCLISTFLEDGIR;MWFQWSEQR;QYLPHVAR;SMFAGVPTMR
-0.280903	-0.309109	-0.314009	-0.279833	-0.0649843	-0.21459	-0.114871	0.826331	12	12	52.743	O15269	SPTLC1	Serine palmitoyltransferase 1		AAALASLKK;ALQGISGLK;DHPALNYNIVSGPPSHK;EKEELIEEWQPEPLVPPVPK;EQEIEDQKNPR;EVAQAVLL;LLKEQEIEDQK;RGDIVFVDR;SFVIDHQR;TEEAIIYSYGFATIASAIPAYSK;VVGESLSPAFHLQLEESTGSR;VVVTVEQTEEELER
-3.51555	-3.42214	-3.52813	-3.70493	-2.56369	-3.80573	-0.130487	0.11894	3	3	62.924	O15270	SPTLC2	Serine palmitoyltransferase 2		EIDEVGDLLQLK;HNNMQSLEK;LVPLLDRPFDETTYEETED
0.941076	0.973967	0.873869	0.898983	1.16214	0.907284	-0.0598319	0.261349	23	23	116.92	O15294	OGT	UDP-N-acetylglucosamine--peptide N-acetylglucosaminyltransferase 110 kDa subunit		AATGEEVPR;AFLDSLPDVK;AIQINPAFADAHSNLASIHK;ALEVFPEFAAAHSNLASVLQQQGK;ASSVGNVADSTEPTKR;DSGNIPEAIASYR;EQGNIEEAVR;EYQAGDFEAAER;FPAVGEPNIQQYAQNMGLPQNR;GQLQEAIEHYR;IDPSTLQMWANILK;IIFSPVAPK;ISPTFADAYSNMGNTLK;ISSPLFNTK;KLVSIVADQLEK;LGTDLEYLK;LGTDLEYLKK;LQEALMHYK;LVSIVADQLEK;MLSFQGLAELAHR;QNPLLAEAYSNLGNVYK;QYTMELER;SAHFSTLAIK
0.719927	0.691996	0.684011	0.705986	0.768716	0.747189	-0.0419855	0.916987	9	8	28.082	O15305	PMM2	Phosphomannomutase 2		EMDDFLQK;GTFIEFR;HVENDGYK;IEFYELDK;IEFYELDKK;IGVVGGSDFEK;TIYFFGDK;TMPGGNDHEIFTDPR;VQEQLGNDVVEK
-1.5559	-1.47491	-1.51424	-1.5631	-1.21962	-1.48702	-0.0917667	0.358086	4	4	68.86	O15321	TM9SF1	Transmembrane 9 superfamily member 1		AGDPVILYVNK;GFVGYMEESGFLPHSHK;IIHTDVFR;SLSLGEVLDGDR
-0.7586	-0.825544	-0.952507	-0.984484	-0.714728	-0.919588	0.0273829	0.0989759	7	7	75.25	O15344;Q9UJV3	MID1	E3 ubiquitin-protein ligase Midline-1		AINQAGSR;EIPIEPAPHLR;LIEPIPDSHIR;NTELETLLAK;QNLESNLTNLIK;VSHDNLTVER;VSHDNLTVERDESSSK
1.71824	1.69273	1.70854	1.76465	2.01769	1.90033	-0.18772	1.20059	9	7	22.98	O15347	HMGB3	High mobility group protein B3		EMKDYGPAK;KDPNAPK;KKDPNAPK;KLGEMWNNLNDSEK;KNPEVPVNFAEFSK;LGEMWNNLNDSEK;NPEVPVNFAEFSK;STNPGISIGDVAK;YEKDVADYK
1.93289	1.89101	1.83521	1.82507	2.08843	1.81798	-0.024127	0.0921221	16	16	59.271	O15355	PPM1G	Protein phosphatase 1G		AIGDHFYK;ALDMSYDHKPEDEVELAR;ALEDAFLAIDAK;AYTGFSSNSER;DENGELR;EEPGSDSGTTAVVALIR;ELAQIAGRPTEDEDEKEK;ETPSQENGPTAK;LPLPYGFSAMQGWR;LTTEEVIK;NLPPEEQMISALPDIK;NTAELQPESGK;NTAELQPESGKR;QLIVANAGDSR;VADEDDVDNEEAALLHEEATMTIEELLTR;YLPDIIK
1.03712	1.04243	1.00406	1.03629	1.23751	1.07142	-0.0871992	0.620173	20	20	138.6	O15357	INPPL1	Phosphatidylinositol 3,4,5-trisphosphate 5-phosphatase 2		AAAEELLAR;ALQDMSSTAPPAPQPSTR;APVPSATK;DFLSGIQK;EEPLTPR;GEETGNIR;GGASHLPHLTR;GSYGLDLEAVR;ILPDGEDFLAVQTSQGVPVR;LDVTLGDLTK;LGVVFEK;LLLDTLQLSK;LLQQQNLPQTGEQELESLVLK;LYEWISIDKDEAGAK;SALLPGPLELQPPR;SFENDAQSSDNINFLK;TIPVQAFEVK;VAVLVKPEHENR;VDQLNLER;VLSGLEILSK
2.18797	2.10952	2.17054	2.25717	2.32878	2.2571	-0.125003	1.68457	13	13	63.972	O15371	EIF3D	Eukaryotic translation initiation factor 3 subunit D		DMPYQPFSK;DNSDFDLLTVSETANEPPQDEGNSFNSPR;DSSVEVR;GAVIATELK;IFHTVTTTDDPVIR;LGDDIDLIVR;SDWEVKEEMDFPQLMK;SVYSWDIVVQR;TLNEWDSR;VADWTGATYQDK;VADWTGATYQDKR;YLILKDPNK;YNFPNPNPFVEDDMDKNEIASVAYR
2.72431	2.64077	2.64871	2.72885	2.78983	2.70833	-0.0710751	0.917908	21	21	39.93	O15372	EIF3H	Eukaryotic translation initiation factor 3 subunit H		ALLDSQFSYQHAIEESVVLIYDPIK;ANITFEYMFEEVPIVIK;DFSPEALK;DFSPEALKK;EFTAQNLGK;EGTGSTATSSSSTAGAAGK;EKDFSPEALK;EKDFSPEALKK;GEPPLPEEDLSK;GGSGDSAVK;GKGGSGDSAVK;HYQEEGQGTEVVQGVLLGLVVEDR;KEGTGSTATSSSSTAGAAGK;LFKPPQPPAR;LFMAQALQEYNN;NSHLINVLMWELEK;QVQIDGLVVLK;RQQENMQR;SAVADKHELLSLASSNHLGK;TAQGSLSLK;VDEMSQDIVK
-1.89282	-1.76399	-1.85194	-1.88263	-1.64606	-1.79629	-0.0612618	0.318099	6	5	48.847	O15379	HDAC3	Histone deacetylase 3		FHSEDYIDFLQR;QTIFENLK;QYLDQIR;SFNIPLLVLGGGGYTVR;VMTVSFHK;YTGASLQGATQLNNK
-3.16626	-3.16791	-3.0888	-3.09184	-3.10266	-3.2242	-0.00142097	0.00939041	2	2	95.05	O15381	NVL	Nuclear valosin-containing protein-like		AVANESGLNFISVK;VAAPEIVSGVSGESEQK
0.214577	0.199215	0.192234	0.136139	0.460328	0.335543	-0.108661	0.501837	6	6	44.287	O15382	BCAT2	Branched-chain-amino-acid aminotransferase, mitochondrial		AADLQLEMTQKPHK;AWVGGVGNYK;KPGPGEPLVFGK;LGGNYGPTVLVQQEALK;LGGNYGPTVLVQQEALKR;NLHIPTMENGPELILR
-1.59719	-1.48609	-1.38258	-1.57072	-1.43967	-1.57207	0.0388657	0.19669	2	1	41.347	O15391	YY2	Transcription factor YY2		FAQSTNLK;KLPPGGLPGIDLSDPK
0.375168	0.339911	0.315308	0.279697	0.371976	0.196463	0.06075	0.494528	13	13	93.045	O15394	NCAM2	Neural cell adhesion molecule 2		ASGSPEPAISWFR;AVDGFTFTEGDK;EALNPETIEIK;EVASEIWK;EVVSPQEFK;GQGDYSK;GQTQEATVVLEIYQK;GSNTELTVR;IEIFQTLPVR;IIELSQTTAK;LTIYNANIEDAGIYR;QDDGGAPILEYIVK;VSNDIIQSK
-2.59547	-2.51318	-2.51619	-2.59362	-2.39781	-2.59655	-0.0122881	0.0599187	7	7	119.94	O15397	IPO8	Importin-8		DAAWYQLLMAPLSEDQR;ETENDDVTNVIQK;EYFEFSEFFLK;GVLSAFNFGTVPSNN;IAAENELNQSYK;IINFAPSLLR;TALQEVYTLAEHR
1.79445	1.73705	1.71348	1.77852	1.8754	1.89576	-0.101567	1.0996	10	10	29.815	O15400	STX7	Syntaxin-7		EFGSLPTTPSEQR;ETDKYIK;ISSNIQK;LVAEFTTSLTNFQK;NLVSWESQTQPQVQVQDEEITEDDLR;QLEADIMDINEIFK;QQYTNQLAK;SYTPGVGGDPAQLAQR;TLNQLGTPQDSPELR;VSGSFPEDSSK
0.640553	0.761536	0.559763	0.637962	0.890014	0.638561	-0.0682287	0.266344	7	7	49.469	O15427	SLC16A3	Monocarboxylate transporter 4		AVSVFFK;DLGVPDTK;EPQPEVAAAEEEK;EVEHFLK;GGAVVDEGPTGVK;LHKPPADSGVDLR;LLDLSVFR
-5.79486	-5.653	-5.73141	-5.74617	-6.18382	-5.72034	0.157023	0.430936	2	2	160.66	O15440	ABCC5	ATP-binding cassette sub-family C member 5		LHDELFR;LSIIPQEPVLFSGTVR
1.02216	1.01727	0.871588	0.909214	1.17255	0.974014	-0.0482562	0.198942	12	12	60.901	O15460	P4HA2	Prolyl 4-hydroxylase subunit alpha-2		APQLLIAPFKEEDEWDSPHIVR;ELVQSLK;EYILVEEAK;LDPGTISR;LLSLDPSHER;QFFPTDEDEIGAAK;QLDAGEEATTTK;SAADAEGYLAHPVNAYK;SSWLEEDDDPVVAR;TAELLQVANYGVGGQYEPHFDFSR;YFEQLLEEER;YFEQLLEEEREK
0.924345	0.954777	0.895258	0.976326	1.04501	0.91806	-0.0550057	0.6089	15	15	73.168	O15484	CAPN5	Calpain-5		ADPDNLQALHTLHLR;AVTAADMEAR;DSPTGANSYVIIK;DTFFQNPQYIFEVK;EWNGPWSDTSEEWQK;GGLISASIK;GHAYAVTDVR;GTPGPAVR;GTSTPEYNVK;KVLFEDPLFPATDDSLYYK;LGHGLLAFFK;VLFEDPLFPATDDSLYYK;VLKDEFLGQVHLK;YFTDIIK;YVIIPTTFEPGHTGEFLLR
2.54244	2.48409	2.58701	2.53126	2.60963	2.55544	-0.0275927	0.296435	13	13	22.417	O15498	YKT6	Synaptobrevin homolog YKT6		AAYDVSSFSFFQR;EADPMTK;GEKLDDLVSK;IDWPVGSPATIHYPALDGHLSR;IILHNTMESLLER;LDDLVSK;LYSLSVLYK;NDSLAGVVIADNEYPSR;SEVLGTQSK;SSVQEFMTFTSQLIVER;VAFTLLEK;VLDEFSK;VQAELDETK
-3.98438	-3.90836	-3.98437	-4.04243	-3.7525	-3.95635	-0.0419467	0.177757	6	6	44.871	O15504	NUP42	Nucleoporin NUP42		DKLTVEELEQFQSK;EGFGLSENPFASLSPDEQKDEK;IPLKPPPLELLNV;KKPNISGFTDISPEELR;KLLEGIVK;SPAASSFGSPGFSGLPASLATGPVR
2.03227	1.99993	1.91666	1.9177	2.11918	1.99907	-0.0290308	0.160525	7	7	16.32	O15511	ARPC5	Actin-related protein 2/3 complex subunit 5		AGSIVLK;ALAAGGVGSIVR;AVQSLDK;GFESPSDNSSAMLLQWHEK;NPPINTK;NTVSSAR;QGNMTAALQAALK
-1.25526	-1.25908	-1.48789	-1.46275	-1.49889	-1.37997	0.113125	0.598459	2	2	16.311	O15514	POLR2D	DNA-directed RNA polymerase II subunit RPB4		AGDVEEDASQLIFPK;ALIPSLEGR
-0.197954	-0.218159	-0.253508	-0.23035	-0.111522	-0.241442	-0.0287689	0.25621	10	10	63.151	O15530;Q6A1A2	PDPK1;PDPK2P	3-phosphoinositide-dependent protein kinase 1;Putative 3-phosphoinositide-dependent protein kinase 2		AGNEYLIFQK;ANSFVGTAQYVSPELLTEK;GEIPWSQELRPEAK;ILGEGSFSTVVLAR;LDHPFFVK;LEYDFPEK;LLVLDATK;LYFTFQDDEK;TFFVHTPNR;YQSHPDAAVQ
-1.99291	-2.10883	-1.9858	-2.12403	-2.18046	-2.06071	0.0925544	0.811272	1	1	47.57	O15533	TAPBP	Tapasin		FVPLPASAK
1.46927	1.39314	1.35564	1.40611	1.31806	1.36412	0.043252	0.442128	5	5	25.592	O15537	RS1	Retinoschisin		FQDSSQWLQIDLK;LIPLGWHVR;LNWIYYK;VFYGNSDR;VISGILTQGR
4.39316	4.34789	4.60548	4.69072	4.83852	4.7714	-0.31804	1.61455	10	10	14.889	O15540	FABP7	Fatty acid-binding protein, brain		ALGVGFATR;LTNSQNFDEYMK;MVMTLTFGDVVAVR;NTEISFQLGEEFDETTADDR;QVGNVTKPTVIISQEGDK;QVGNVTKPTVIISQEGDKVVIR;SVVSLDGDK;SVVSLDGDKLVHIQK;VEAFCATWK;WDGKETNFVR
-0.251926	-0.146797	-0.158709	-0.186899	0.105414	-0.262306	-0.0712137	0.239959	6	6	38.787	O15541	RNF113A	E3 ubiquitin-protein ligase RNF113A		ATGEGGASDLPEDPDEDAIPIT;DAQAIFER;GINNYQK;GKEDDKIYR;HGWQIER;QSFQNPVVTK
-1.85967	-1.81005	-1.65121	-1.77876	-1.87904	-1.79411	0.0436602	0.24598	7	7	154.17	O15550;O14607	KDM6A;UTY	Lysine-specific demethylase 6A;Histone demethylase UTY		ASGESEEASPSLTAEER;EAYEQLLQTENLSAQVK;ESYAIQYLQK;LDLGLFSTK;LLPSIEEAWSLPIPAELTSR;LQHLEQLR;LQLHELTK
3.96364	3.9075	3.92308	3.97129	4.00148	3.94378	-0.040775	0.797757	38	37	90.932	O43143	DHX15	ATP-dependent RNA helicase DHX15		ALVTGYFMQVAHLER;ASTNAMLISAGLPPLK;DNQVVQLHPSTVLDHKPEWVLYNEFVLTTK;DYLEAAIR;DYYINIR;EAMNDPLLER;EVDDLGPEVGDIK;FAHIDGDHLTLLNVYHAFK;FTDILVR;GVACTQPR;HQSFVLVGETGSGK;HRLDLGEDYPSGK;IFEPPPPK;IFEPPPPKK;IIPLYSTLPPQQQQR;KAADEAK;KALVTGYFMQVAHLER;KLGIDDLVHFDFMDPPAPETLMR;LDLGEDYPSGK;LGIDDLVHFDFMDPPAPETLMR;LQLPVWEYK;LQLPVWEYKDR;RLQLPVWEYK;SLMSADNVR;SNLGSVVLQLK;STDFTSR;TEMQDNTYPEILR;TGHYLTVK;THPVEIFYTPEPER;THPVEIF…
2.3438	2.37999	2.33538	2.35041	2.47116	2.3329	-0.0317678	0.280603	22	22	54.843	O43148	RNMT	mRNA cap guanine-N7 methyltransferase		ASVNSETESSFNINENTTASGTGLSEK;DSEYIFSAEFITADSSK;EFEDDLVK;ETEDVPKDK;IALEDVPEK;KIALEDVPEK;KLDPEIVPEEK;KTFLEFYEEK;LDPEIVPEEK;LEASETESFGNEIYTVK;LPLGTLSK;LSPGGYFIGTTPNSFELIR;LVSEKVDDYEHAAK;MQALEPYPANESSK;NLEEGHSSTVAAHYNELQEVGLEK;RKEFEDDLVK;RLEASETESFGNEIYTVK;SSTGDGTQNK;SSTGDGTQNKR;SVLIGEFLEK;TFLEFYEEK;VDDYEHAAK
0.399424	0.353832	0.366985	0.391157	0.549203	0.512192	-0.11077	1.04899	24	24	331.07	O43149	ZZEF1	Zinc finger ZZ-type and EF-hand domain-containing protein 1		AHGFEEIR;AIHLLLR;AILESLFSQYSGK;ALALLGVLPDGDSSLEDQALPVTVPTGASEEQLEK;ALTELFFVTENR;AQAQSILEVLK;AQELGVLQDYLLALTTDDHLLR;ASTIFSTGTESAFQVTQIR;ATFLQTDLLK;AVHEEIRPVDFK;DLAVDLIEK;ESLDQLVQK;GEESVTLEQFR;IALSEEFAQVYSLADGIR;KLDPLEGLDEPTR;LEEQSAK;LISSTESELQQSYAK;LLPAEVDAAVIK;RFDGDELTTDER;SAALLHK;SGPENLLVEPWTR;STDSGAK;VVPHLPLAK;YDYLEFTDAR
-1.15004	-1.12499	-1.26262	-1.23371	-0.893432	-1.13251	-0.0926606	0.351927	11	9	111.65	O43150	ASAP2	Arf-GAP with SH3 domain, ANK repeat and PH domain-containing protein 2		AINSSGLAHVENEEQYTQALEK;ASIEIANESGETPLDIAK;AVESLKPSIETLSTDLHTIK;DAANLAK;DIFGLLQAYADGVDLTEK;EIISEVQR;GDDNTGENNIVQELTK;GVDLLQNLIK;KGAFPVSFVHFIAD;KGVDLLQNLIK;NTVAAIEEALDVDR
-1.66243	-1.6582	-1.63985	-1.58905	-1.41564	-1.385	-0.190263	1.38882	4	4	74.048	O43155	FLRT2	Leucine-rich repeat transmembrane protein FLRT2		AALAQLLK;LIVDGNLLTNK;LYLQDNQINHIPLTAFSNLR;VLHLQENNIQTISR
-5.6208	-5.38032	-5.48738	-5.51341	-5.41383	-5.84797	0.095568	0.255604	2	2	122.07	O43156	TTI1	TELO2-interacting protein 1 homolog		ALIQVLELDVADIK;SLDELEQK
-0.972506	-0.917278	-0.963083	-0.906639	-0.792512	-0.944773	-0.0696478	0.644282	12	12	232.3	O43157	PLXNB1	Plexin-B1		ALWPPDPQAAFSYEETAK;EDVEYRPLTLNALLAVGPGAGEAQGVPVK;FIHTLESQR;GVPLTQRPDPR;GVSEHDFAYQDPK;IFFPGHR;LQQIAAAVENK;TLLSDLVAQYVAK;TPALPGLPEDPWVR;VALHELYK;VQIQLENLESSVR;YYDQIITALEEDGTAQK
-5.09919	-5.07989	-5.03662	-5.16116	-4.80595	-5.04338	-0.0684013	0.256337	2	2	78.213	O43164	PJA2	E3 ubiquitin-protein ligase Praja-2		ENSSGSSPLDQVDSSLPSEPIFEK;YQESLGNTVFELENR
-0.894344	-0.969357	-0.834162	-0.836624	-0.889865	-0.835253	-0.0453736	0.454373	5	4	200.03	O43166	SIPA1L1	Signal-induced proliferation-associated 1-like protein 1		FPFISLASK;GSVLEDAIPSTAK;QPMPDPGLMPLPDTAADLDWSNLVDAAK;TGPSLHR;VINAENAAHK
0.598713	0.554903	0.475584	0.489874	0.645955	0.65325	-0.0532929	0.342983	6	6	16.694	O43169	CYB5B	Cytochrome b5 type B		ELWLVIHGR;FLNEHPGGEEVLLEQAGVDASESFEDVGHSSDAR;GQEVETSVTYYR;SGSMATAEASGSDGK;SGSMATAEASGSDGKGQEVETSVTYYR;YYTSESK
1.69909	1.6865	1.76087	1.70465	1.83925	1.74319	-0.0468772	0.435116	19	19	58.449	O43172	PRPF4	U4/U6 small nuclear ribonucleoprotein Prp4		ALGEPITLFGEGPAER;APDDLVAPVVK;ASSTQATK;EIPETTR;FEPIHGNFLLTGAYDNTAK;GESGILGK;GHNTNVGAIVFHPK;IWTHPGWSPLK;KPHIYYGSLEEK;LWIANYSLPR;LWSLDSDEPVADIEGHTVR;NILSVVGTDALK;NILSVVGTDALKK;QINVSTDDSEVK;SKEEYQQTWYHEGPNSLK;STVSLDPK;TKAPDDLVAPVVK;TLAGHEGK;TSQMQELHK
2.5961	2.54153	2.594	2.67891	2.83516	2.72978	-0.170742	1.58796	14	14	56.65	O43175	PHGDH	D-3-phosphoglycerate dehydrogenase		AGTGVDNVDLEAATR;AWAGSPK;DLPLLLFR;GGIVDEGALLR;GTIQVITQGTSLK;ILQDGGLQVVEK;KILQDGGLQVVEK;MQSFGMK;QADVNLVNAK;QHVTEAFQFHF;QIPQATASMK;TLGILGLGR;TQTSDPAMLPTMIGLLAEAGVR;VTADVINAAEK
-0.207407	-0.357412	-0.198408	-0.257633	-0.394694	-0.35038	0.0798267	0.537775	4	4	20.108	O43181	NDUFS4	NADH dehydrogenase [ubiquinone] iron-sulfur protein 4, mitochondrial		EDAVSFAEK;LDITTLTGVPEEHIK;NNMQSGVNNTK;SYGANFSWNK
0.918505	0.866486	0.840069	0.961111	1.05098	1.1349	-0.173976	1.46237	5	4	32.261	O43186;P32242	CRX	Cone-rod homeobox protein		FTYNPMDPLDYKDQSAWK;INLPESR;QQQQPPGGQAK;SQLEELEALFAK;TQYPDVYAR
-1.71852	-1.45843	-1.29149	-1.5415	-1.36504	-1.84681	0.0949704	0.194139	2	2	62.105	O43189	PHF1	PHD finger protein 1		GLDWDAGHLSNR;SETVVPGNR
2.11239	2.02089	2.07578	2.10221	2.14929	2.11809	-0.0535065	0.827538	20	16	55.098	O43236;Q8WYJ6	SEPTIN4	Septin-4		ADTLTPPEVDHK;ADTLTPPEVDHKK;DESGLNR;DESGLNRK;EEIEHFGIK;EKDEELRR;ESGTDFPIPAVPPGTDPETEK;ESIPFAVIGSNTVVEAR;ETHYENYR;FLEDTTDDGELSK;GFDFTLMVAGESGLGK;HAVDIEEK;IMQTVEITK;IREEIEHFGIK;KIREEIEHFGIK;KLLGAEER;LDPYDSSEDDKEYVGFATLPNQVHR;MQEMLHK;STLVNSLFLTDLYR;THMQDLK
3.30653	3.27888	3.27542	3.29601	3.42358	3.33728	-0.0653448	0.775029	23	23	54.099	O43237	DYNC1LI2	Cytoplasmic dynein 1 light intermediate chain 2		APVGVEK;ASESPAR;DAVFIPAGWDNEK;DAVFIPAGWDNEKK;DEHLDFIQSHLR;EHDYRDEHLDFIQSHLR;ELAAEDEQVFLMK;GGPASVPSSSPGTSVK;GLEYLYLSVHDEDRDDHTR;GPSGSPR;IAILHENFTTVKPEDAYEDFIVKPPVR;KPDSMVTNSSTENEA;KTGSPGSPGAGGVQSTAK;LQGAEHGK;LQGAEHGKK;LVHDKELAAEDEQVFLMK;NILVFGEDGSGK;NLDLLYK;NNAASEGVLASFFNSLLSK;QQSLLAK;TGSPGSPGAGGVQSTAK;TVLSNVQEELDR;TYGFHFTTPALVVEK
3.94431	3.88582	3.8884	3.93649	4.01789	3.94247	-0.0594397	0.852168	36	36	60.977	O43242	PSMD3	26S proteasome non-ATPase regulatory subunit 3		AIQLEYSEAR;ALDLVAAK;APQHTAVGFK;AVQGFFTSNNATR;DFLLPFLEEPMDTEADLQFRPR;DGVIEASINHEK;DLESAEER;DLESAEERR;EEAATGGGSTGEADGK;ELDTVTLEDIK;ELDTVTLEDIKEHVK;EMAEDDDDSFP;EMIDIYSTR;EPQLAFHQR;EQQDLEFAK;EREQQDLEFAK;FNQVLDQFGEK;FQADGTYTLIIR;HDADGQATLLNLLLR;ISDDLMQK;ISLADIAQK;KAPQHTAVGFK;LNHYVLYK;LQLDSPEDAEFIVAK;MISLSYSR;MLPSTSR;NYLHYSLYDQAEK;RLNHYVLYK;SLMPYFLLTQAVR;SVFPEQANNNEWAR;SYNKDLESAEER;TAAAAAEHSQR;TMTNALR;…
-3.25043	-3.15952	-3.28364	-3.37352	-2.98466	-3.25512	-0.0267677	0.0779826	4	4	41.373	O43251;Q9NWB1;A6NFN3	RBFOX2;RBFOX1;RBFOX3	RNA binding protein fox-1 homolog 2;RNA binding protein fox-1 homolog 1;RNA binding protein fox-1 homolog 3		FRDPDLR;GFGFVTFENSADADR;KIEVNNATAR;LHVSNIPFR
1.40417	1.45077	1.30907	1.33099	1.53551	1.43809	-0.0468601	0.257898	17	17	70.832	O43252;O95340	PAPSS1	Bifunctional 3-phosphoadenosine 5-phosphosulfate synthase 1;Sulfate adenylyltransferase;Adenylyl-sulfate kinase		ATNVTYQAHHVSR;AWTVLTEYYK;DDDVPLMWR;DIVPVDASYEVK;DLYEPSHGAK;DPAGMPHPETGK;ELYVPENK;GFTGIDSEYEKPEAPELVLK;GQVVGTR;LTPTELK;NLGFSPEDREENVR;NLGFSPEDREENVRR;NPEFFEHR;RPVLLLHPLGGWTK;TDAETLPALK;VLTMAPGLITLEIVPFR;VYWNDGLDQYR
1.06227	1.12069	1.14806	1.08194	1.30942	1.08623	-0.0488558	0.243347	18	18	88.828	O43264	ZW10	Centromere/kinetochore protein zw10 homolog		ALFQNTER;AMGTLLNTAISEVIGK;ASFVTEVLAHSGR;DLHVSTGEFTDLK;DSVVLSLLK;GDTTDLLK;GPLAAAFSSSEVK;INVPELPTPDEDNKLEVQK;ITALEDISTEDGDR;LSEDIDLLK;LVLEVLQK;QLLDLPLDTDLENEK;QNILYHLGEEWQK;QVLHQLK;SFGQMLLK;TVMDEGPQVFAPLSEESK;YQEEVPVYVPK;YVTGAQR
2.97093	2.92934	2.87933	2.86546	3.05465	2.93116	-0.0238892	0.144307	39	39	90.254	O43290	SART1	U4/U6.U5 tri-snRNP-associated protein 1		ADDLLPLGDQTQDGDFGSR;DDGYEAAASSK;DGYKPDVK;DLQGLTVEHAIDSFR;EAAGTTAAAGTGGATEQPPR;EAGTKEEPVTADVINPMALR;EEPVTADVINPMALR;EGETMILTLK;EKDLAEK;ERELEEIR;GFTQDFK;GFTQDFKEK;GLLETTVQK;GWEEDEDPER;IEYVDETGR;IEYVDETGRK;KKPDYLPYAEDESVDDLAQQKPR;KLDEEALLK;KLDEEALLKK;KPDYLPYAEDESVDDLAQQKPR;LASEYLTPEEMVTFK;LASEYLTPEEMVTFKK;LDEEALLK;LDEEALLKK;LEQGGTADGLR;LGLKPLEVNAIK;LQAQSLSTVGPR;MSSSDTPLGTVALLQEK;QLQQLQQLR;QQQDFSASST…
-0.548847	-0.5625	-0.525669	-0.57378	-0.493182	-0.576015	0.00198714	0.0226576	8	8	67.622	O43292	GPAA1	Glycosylphosphatidylinositol anchor attachment 1 protein		GLLSDPVR;GLLSDPVRR;GQIYWAK;KLPFPDETHER;LPFPDETHER;SGALPVAWLER;SVGLEVYTQSFSR;YMVSGTNVYGILR
-1.86727	-1.84206	-1.84901	-1.8843	-1.71986	-1.86039	-0.0312611	0.237312	3	3	52.535	O43293	DAPK3	Death-associated protein kinase 3		GALLGTSGLK;LIDFGIAHK;QILDGVHYLHSK
1.89088	1.81693	1.84908	1.86569	2.02391	1.80779	-0.0468378	0.276479	30	24	124.5	O43295	SRGAP3	SLIT-ROBO Rho GTPase-activating protein 3		ADSEASSGPLLDDK;ANQQETEMFYFTK;ASEDWWEGR;DINSVAGVLK;DKEIIAEYEAQIK;EAEKQEEK;EIGLQMHEELLK;ELEGPVYEK;FQDLISTIK;GASLLLYHR;GEDPLVDDQNER;GEDPLVDDQNERDINSVAGVLK;GLENPLFPK;GLGPSIDTPPR;HEDRPQR;HEGLDVIENAVDNLDSR;IENEEVRK;KAEIELEYSR;KGASLLLYHR;LSQISEDVIR;NDYLLNLAATNAAISK;QAPDVVLDTLEPLK;SLEAEALAEDIEK;TIIIHHEAIFPSPR;TQLVEQFK;TYLSAEYNLETSR;VHQIQQILVTLPR;VPGSQVEVNDIK;VTNELYTVMK;YINLYGLQQQGIFR
-4.30036	-4.28467	-4.38517	-4.35848	-4.14863	-4.34075	-0.0407823	0.213746	5	5	88.604	O43299	AP5Z1	AP-5 complex subunit zeta-1		ASLLLSK;EIQDEELKK;LLQAEDLGPDTLDSLQR;SAPAASERPLWDTSLR;VVVLSPGTLQEDQATLLSK
2.71115	2.69505	2.67932	2.66155	2.85162	2.67811	-0.0352507	0.223977	25	23	74.977	O43301	HSPA12A	Heat shock 70 kDa protein 12A		ADKEAGGSDGPR;ATAIDIATSK;ATGGPYGSLGVDYEFEK;DFYHDLDPNEAK;DLFQKPEVSTVK;EIQTLMQFGDTEIK;ELSDQAGSEFENSDVR;ETAPTSAYSSPAR;FISADQSVALGELVK;GAVLFGLDPAVIK;GHSVEHALR;IFGEDFIEQFK;IIIPQDVGLTILK;KFHSFGYAAR;KSNVDFVK;LDLTGTSGTAVPAR;LHQMIELSSK;LPEGHLK;QWLYLEK;RSPLTYGVGVLNR;SNVDFVK;SPLTYGVGVLNR;TPTTILLTPER;VGIDFLNY;WEGGDPGVSNQK
-3.75345	-3.75647	-3.88416	-3.91039	-3.49678	-3.884	-0.0343027	0.0866775	5	5	113.42	O43303	CCP110	Centriolar coiled-coil protein of 110 kDa		GIVSAQDASLQER;IQEASLSTESFLPAQSESISLIR;RLDLDIDGLQK;VIPTFVTENNVIK;VQEILDNVQVR
-4.30355	-4.15244	-4.23122	-4.19684	-3.97332	-4.33402	-0.061012	0.207381	4	2	130.61	O43306	ADCY6	Adenylate cyclase type 6		AVALGFEDTEVTTTAGGTAEVAPDAVPR;DVAAHFLAR;GTQDALNPEDEVDEFLSR
-4.21257	-4.15981	-4.2196	-4.16528	-4.23423	-4.36108	0.0562029	0.393047	4	3	60.982	O43307	ARHGEF9	Rho guanine nucleotide exchange factor 9		ANVINEIMSTER;ETEEIHLFFAK;VIFGNIEDIYR;YPLQLAELLK
-3.22271	-3.11596	-3.1963	-3.2899	-2.77289	-3.32692	-0.0484219	0.0952758	5	5	67.586	O43310	CTIF	CBP80/20-dependent translation initiation factor		GKLEDGDGINLNDIEK;HNRDHQK;LDFTQFHR;LLEEQLPEMMTELLASAR;SPDTLAPVASER
-0.798536	-0.854792	-0.868593	-0.741642	-0.726676	-0.832537	-0.0736888	0.87013	9	8	82.25	O43312	MTSS1	Protein MTSS 1		GDIQPQLDSALQDVNDK;GLQLDTQR;GSYPVWEDFINK;LPSSSEQVILDLK;MEAVIEK;TTVVAAAAFLDAFQK;VADMATNTR;VANQLDKDHAK;YLLLEETEK
0.182703	0.161472	0.185038	0.150822	0.258903	0.208338	-0.0296164	0.388769	17	12	140.41	O43314	PPIP5K2	Inositol hexakisphosphate and diphosphoinositol-pentakisphosphate kinase 2		ALADIVIPQEYGITK;ASSKPATSGPSSAVVPNTSSR;DRDFTAEDYEK;EVYSILQAEGILLPR;FFDLFEK;FFVGPEDTEINPGNYR;GLLALEGELTPILVQMVK;ILPTPPATLK;IYASDEGR;KSPALDGK;LHEILQK;LHPVYSR;LTPSGSISLIK;QLQEVLDIAR;QVDEFLASIASPSSDVPR;VQAEELGR;VYTVGPDYAHAEAR
0.880882	0.887802	0.782398	0.80105	1.17741	0.948555	-0.125312	0.473868	10	10	19.81	O43324	EEF1E1	Eukaryotic translation elongation factor 1 epsilon-1		AAAAELSLLEK;AIVQQWLEYR;DLNSYLEDK;EYLLGSTAEEK;FIVDLTVQEK;NDIHTLLK;QANKEYLLGSTAEEK;QHLSSVVFIK;VTQVDGHSSK;YSAQGER
3.14456	3.21002	3.24815	3.33033	3.48231	3.24576	-0.15189	0.940596	12	10	39.124	O43347	MSI1	RNA-binding protein Musashi homolog 1		EVMSPTGSAR;EYFGQFGEVK;GFGFVTFESEDIVEK;GFGFVTFMDQAGVDK;GTGSHPWTMAPPPGSTPSR;IFVGGLSVNTTVEDVK;MFIGGLSWQTTQEGLR;QYFEQFGK;SYTGLAPGYTYQFPEFR;TPLPSAPVLPELTAIPLTAYGPMAAAAAAAAVVR;VCEIHFHEINNK;VDDAMLMFDK
1.06555	0.976824	0.951538	1.04996	1.24041	1.19592	-0.164123	1.15009	16	1	90.457	O43374	RASA4	Ras GTPase-activating protein 4		AHLGALLSALSR;AVQNVGNMDTPASR;DTIASHPK;EGPLFIHR;ELSGGAEAGTVPTSPGK;FFSPAIMSPK;LFLGQGLAK;LQPDQSK;LVDIEEKDELDLQR;QGVAQLK;TLLLLAK;TLSLQAPPVK;VDNEPIIR;VPEDSLAR;VVIDVQR;VVQQEEGWFR
4.79095	4.7358	4.69403	4.79999	4.89413	4.82447	-0.0992702	1.17313	34	26	70.942	O43390	HNRNPR	Heterogeneous nuclear ribonucleoprotein R		ADGYNQPDSK;AGPIWDLR;AMDEMNGK;DLYEDELVPLFEK;DYAFVHFEDR;EAAQEAVK;EEEEPMDTSSVTHTEHYK;EFNEEGALSVLQQFK;EIEGEEIEIVLAKPPDK;EIEGEEIEIVLAKPPDKK;ENILEEFSK;ESDLSHVQNK;GFCFLEYEDHK;GYAFITFCGK;KADGYNQPDSK;KADGYNQPDSKR;KYGGPPPDSVYSGVQPGIGTEVFVGK;LCDSYEIRPGK;LDEIFQTGLVAYVDLDER;LFVGSIPK;LKDYAFVHFEDR;LMMDPLSGQNR;NLATTVTEEILEK;SFSEFGK;STAYEDYYYHPPPR;TGYTLDVTTGQR;TKENILEEFSK;TLIEAGLPQK;VQESTKGPDEAK;VTEGLVDVILYHQPDDK…
2.24775	2.23145	2.20968	2.23406	2.39256	2.2898	-0.0758467	0.72787	25	25	77.528	O43395	PRPF3	U4/U6 small nuclear ribonucleoprotein Prp3		AADHLKPFLDDSTLR;AHEEANAAR;DVNVVVVEGGPK;EAQKELQEK;EIELTHR;EKPSEDMESNTFFDPR;ELDELKPWIEK;ELKEVFGDDSEISK;EVFGDDSEISK;FEEVEEEPEVIPGPPSESPGMLTK;HGAEHYWDLALSESVLESTD;KAADHLKPFLDDSTLR;LALIAPK;LFEAVEEGR;LGLMPPPEPK;LPIGNTIQPSQAATFMNDAIEK;LQAEISQAAR;QLSFISPPTPQPK;TGIHTSTR;TPSSSQPER;TVDATGK;VELKDQTKPTPLILDEQGR;VLGTEAVQDPTK;VLGTEAVQDPTKVEAHVR;VSIAPSQR
2.89052	2.75308	2.85235	2.87883	2.88046	2.95696	-0.0734345	0.690834	13	13	32.251	O43396	TXNL1	Thioredoxin-like protein 1		FQGPDNGQGPK;FQNVNSVTIFVQSNQGEEETTR;GYMDLMPFINK;IAPAFSSMSNK;IDQYQGADAVGLEEK;IFINLPR;IKQHLENDPGSNEDTDIPK;ISYFTFIGTPVQATNMNDFK;ISYFTFIGTPVQATNMNDFKR;QHLENDPGSNEDTDIPK;SEPTQALELTEDDIKEDGIVPLR;SMDFEEAER;VGVKPVGSDPDFQPELSGAGSR
0.968376	0.970093	0.909281	0.905848	1.19141	1.05143	-0.100311	0.51929	13	13	22.237	O43399	TPD52L2	Tumor protein D54		AELTKVEEEIVTLR;GLLSDSMTDVPVDTGVAAR;KTQETLSQAGQK;LGEWNEK;LGLSTLGELK;MDSAGQDINLNSPNK;TPAVEGLTEAEEEELR;TPAVEGLTEAEEEELRAELTK;TQETLSQAGQK;TSAALSTVGSAISR;VEEEIVTLR;VTQSDLYK;VVGDRENGSDNLPSSAGSGDKPLSDPAPF
0.964718	0.909119	0.923199	1.01169	1.0496	1.05772	-0.107327	2.09458	6	6	23.773	O43402	EMC8	ER membrane protein complex subunit 8		DASPNQVAEK;IAEGFSDTALIMVDNTK;ISASLLDSR;MVLHGAK;SYETLVDFDNHLDDIR;VKDASPNQVAEK
-5.40108	-5.39092	-5.49841	-5.4402	-5.33187	-5.37501	-0.047775	0.440572	3	3	59.482	O43405	COCH	Cochlin		EFTGLEPIVSDVIR;ESHAFFTR;TFEISDIGAK
0.150255	0.126486	0.13027	0.0621166	0.286946	0.0749645	-0.00567214	0.0259443	4	4	37.238	O43414	ERI3	ERI1 exoribonuclease 3		EGLLDPNVK;NIANIMK;QWINLKK;VDEWMAK
3.15752	3.12834	3.16798	3.19394	3.24976	3.13971	-0.0431916	0.565796	42	41	173.1	O43426	SYNJ1	Synaptojanin-1		AFQSHLK;AGVISAPQSHAR;ALLTTGSLR;ASEHAADIQMVNFDYHQMVK;DVAVDTVK;EFGGIGAPPSPGVAR;EGEHMLSK;ERNEDFIEIAR;EVIAVQGPPDGTVLVSIK;GFEANAPAFDR;GSTFLPEPLKPQAAFPPQSSLPPPAQR;GSVPLFWEQPGLQVGSHR;IDLPNEEVK;IDSSDEDR;IDSSDEDRISEVR;ILYTWTPGTLLHYGR;IQESEVFR;IYAGTGALEGK;KLSFPMGR;LAGIQEFQDK;LAGIQEFQDKR;LDPPPFSLIVETR;LHSVLKPQVQK;LTPESQSK;LWAVELQK;NEDFIEIAR;NLEEEMSLEK;NQTLTDWLLDAPK;QEAIDVLLLGNTLNSDLADK;QIIVNLLGSK;QLEALGLAEK…
0.996061	1.08179	1.08921	0.995062	1.21484	1.00088	-0.0145712	0.0648311	12	12	41.878	O43427	FIBP	Acidic fibroblast growth factor intracellular-binding protein		DLDDISTK;DLFVDLVEK;GLVNVAAK;GSLVDNIQQHFLLSDR;HQALWDR;LGVFSEMEANFK;LLHAPPK;LLHQLIFQIPPSR;LWLDGYSVTDAVALR;TFHMLER;VLVADKDLLDLHK;YYAFDEAFVR
2.93217	2.91316	2.85067	2.88387	2.99793	2.8184	-0.00140222	0.007954	42	37	176.65	O43432	EIF4G3	Eukaryotic translation initiation factor 4 gamma 3		AAIIADSSTFR;AALSEEELER;AALSEEELERK;AQLGSWGK;ASETDALR;DFLPEGEDVHNFLLEQK;DHMGQLLYQLVQSEK;DSQADDPENIK;EFEKDKADDDVFEK;ELEAASAPEER;ELSAEELYK;ELTIEFSKPLLPVGR;FIGELFK;FSALQPPAPSGSTPSTPVEFDSR;GPDFTPAFADFGR;GVIDLVFEK;IEEQEEQR;IEVEADGQTEEILDSQNLNSR;IRDPNQGGK;ITKPTIDEK;KELSAEELYK;KIITVSVK;KVQQLMTK;LHDELEEAK;LHDELEEAKDK;LLTTIGK;LSATESIVEIVK;LTPQMFNQLMK;LVLSGEK;MDQYFNQMEK;QKELEAASAPEER;QLTGGVDVER;QVSGLTVDTEER…
0.332108	0.322954	0.271284	0.218576	0.513539	0.297892	-0.0345538	0.142082	4	4	19.208	O43447	PPIH	Peptidyl-prolyl cis-trans isomerase H		AVANSSPVNPVVFFDVSIGGQEVGR;GPFADENFK;IELFADVVPK;IIDGLLVMR
0.400211	0.445961	0.429407	0.442707	0.44567	0.319696	0.0225019	0.198555	7	7	48.84	O43464	HTRA2	Serine protease HTRA2, mitochondrial		EPLPTLPLGR;EPSFPDVQHGVLIHK;ETLTLYVTPEVTE;LLSGDTYEAVVTAVDPVADIATLR;SQYNFIADVVEK;TAPAVVYIEILDR;VILGSPAHR
2.98287	2.88924	2.96193	3.02747	3.15735	3.08775	-0.146177	1.44411	14	14	39.589	O43488;Q8NHP1;O95154	AKR7A2	Aflatoxin B1 aldehyde reductase member 2		ALQAAYGASAPSVTSAALR;ANPWDGK;EHHFEAIALVEK;FFGNSWAETYR;FYAYNPLAGGLLTGK;MDAPASAAAVR;QVETELFPCLR;RMDAPASAAAVR;SLKPDSVR;SQLETSLK;SQLETSLKR;VASVLGTMEMGR;YEDKDGKQPVGR;YKYEDKDGK
2.44291	2.39169	2.45031	2.524	2.55493	2.4704	-0.0881395	1.33822	22	22	97.201	O43490	PROM1	Prominin-1		ANSLPPGNLR;AWNYELPATNYETQDSHK;DFPEDTLR;DFPEDTLRK;DKAFTDLNSINSVLGGGILDR;HATPTTR;IDYDKPETVILGLK;KLADSNFK;LADSNFK;LRPNIIPVLDEIK;LSLSQLNSNPELR;MNYDSYLAQTGK;QLPPVDAELDNVNNVLR;QTTTVVAGIK;SLHQQSTQLSSSLTSVK;SMATAIK;SPAGVNLLSFAYDLEAK;TDLDGLVQQGYQSLNDIPDR;TLLNETPEQIK;VLDTPYLLNEDWEYYLSGK;VLPIEQSLSTLYQSVK;VNLNIFLLGAAGR
5.80507	5.77015	5.80815	5.89747	5.85695	5.80591	-0.0589851	0.946544	69	63	112.59	O43491	EPB41L2	Band 4.1-like protein 2		AEVGKDER;APHLQLIEGK;AQEDILK;DFPGAAGEISAYGPGLVSIAVVQDGDGR;DFPGAAGEISAYGPGLVSIAVVQDGDGRR;DSEGVDIK;DSSQLGTDATK;DYFGLLFQESPEQK;EEAVPEASPVTQAGASVITVETVIQENVGAQK;EEKPSVSK;EEPLPEEQR;EEQEYEEEVEEEPRPAAK;EISPGSGPGEIR;EKETSESR;EPTQAVVEEQVLDK;EPTQAVVEEQVLDKEEPLPEEQR;EQHPDMSVTR;ETELAEEGED;ETQEDKLEGGAAK;EVAENQQNQSSDPEEEK;EVAENQQNQSSDPEEEKGSQPPPAAESQSSLR;EVAENQQNQSSDPEEEKGSQPPPAAESQSSLRR;EVPIVQTETK;EVQTNELK;EVQ…
-0.794518	-0.831919	-0.577085	-0.942928	-0.679919	-0.804287	0.0745376	0.271728	8	8	45.879	O43493	TGOLN2	Trans-Golgi network integral membrane protein 2		ADTNQLADK;IIAFVLEGK;KIIAFVLEGK;LSPHAFK;SGAEEQGPIDGPSK;SGAEEQTSK;SGSEAQTTK;SHPEPQTPK
-3.31834	-3.04578	-3.15181	-3.29457	-2.93095	-3.43233	0.0473086	0.100317	2	2	9.6138	O43504	LAMTOR5	Ragulator complex protein LAMTOR5		GTLSDEHAGVISVLAQQAAK;MEATLEQHLEDTMK
-0.0243988	0.0526371	0.117456	0.100492	0.17575	-0.0590096	-0.023846	0.106988	7	7	47.119	O43505	B4GAT1	Beta-1,4-glucuronyltransferase 1		EAENQHNK;EMLDQSNQWGGTALVVPAFEIR;EPGEFALLR;TALASGGVLDASGDYR;VPTFDER;WEGPLSVSVFAATK;YEAAVPDPR
-0.442791	-0.26684	-0.444105	-0.447836	-0.0895777	-0.429874	-0.0621494	0.181175	6	5	71.276	O43524;Q12778;A8MYZ6	FOXO3	Forkhead box protein O3		AALQTAPESADDSPSQLSK;AGSAMAIGGGGGSGTLGSGLLLEDSAR;AIESSPDKR;DKGDSNSSAGWK;GSGLGSPTSSFNSTVFGPSSLNSLR;SSDELDAWTDFR
-0.545067	-0.592142	-0.704603	-0.578247	-0.732854	-0.781227	0.0835053	0.466979	3	3	42.813	O43567	RNF13	E3 ubiquitin-protein ligase RNF13		AAIVHNVDSDDLISMGSNDIEVLK;KIDIPSVFIGESSANSLKDEFTYEK;LPAEGLK
-3.4162	-3.40396	-3.26062	-3.36956	-3.09063	-3.40199	-0.0728664	0.262456	3	3	73.817	O43572	AKAP10	A-kinase anchor protein 10, mitochondrial		EDAVNILQFWLAADNFQSQLAAK;SIEQDAVNTFTK;YFSLQATHPLGFDDVVR
1.20809	1.02952	1.01695	1.09685	1.19076	1.16938	-0.067474	0.423731	7	7	22.092	O43583	DENR	Density-regulated protein		AADISESSGADCK;LDADYPLR;LTVENSPK;NFPNEFAK;QEAGISEGQGTAGEEEEK;WPEVDDDSIEDLGEVK;WPEVDDDSIEDLGEVKK
1.67788	1.6827	1.55864	1.5729	1.78694	1.61889	-0.0198393	0.0922781	20	20	109.96	O43592	XPOT	Exportin-T		ALAYFEQLK;ANVEAIMLAVMK;DGPVGFADFVYK;DLQEFIPLINQITAK;DVVHTSEEAR;GMDPVDK;GVDLYLR;ILMAIDSELVDRDVVHTSEEAR;LAQVSPELLLASVR;LMLAQDEER;LVELWGGK;MDEQALLGLNPNADSDFR;NAQEALQAIETK;NLLTPLMEK;QLTVLSDQQK;QMNPFIEDILNR;TYSDDHVK;VFSSTLQNWQTTR;VLVTVIQGAVEYPDPIAQK;YSELTTVQQQLIR
1.18202	1.24807	1.33215	1.29909	1.49018	1.37666	-0.134564	0.890023	7	7	19.108	O43598	DNPH1	5-hydroxymethyl-dUMP N-hydrolase		AAAMVPGR;AVAFNKR;FGTVLTEHVAAAELGAR;FQVWDYEEGEVEALLDR;GEEAAGGDR;VLSAMIR;YFEADPPGQVAASPDPTT
2.58067	2.40581	2.36038	2.40613	2.63545	2.42888	-0.0412035	0.155495	15	12	40.573	O43602	DCX	Neuronal migration protein doublecortin		APQSLASSNSAQAR;ASPTPQK;GIVYAVSSDR;GNPSATAGPK;LETGVVKK;LYTLDGK;MELDFGHFDER;MELDFGHFDERDK;NVNPNWSVNVK;SFDALLADLTR;SLSDNINLPQGVR;TAHSFEQVLTDITEAIK;TLQALSNEK;TLQALSNEKK;YIYTIDGSR
2.51954	2.48885	2.47845	2.56801	2.66233	2.54122	-0.09491	1.15196	27	27	51.355	O43615	TIMM44	Mitochondrial import inner membrane translocase subunit TIM44		ALGLQFHSR;ALSQGVESVK;ALSQGVESVKK;DFKENNVVFNR;DQDELNPYAAWR;EGVEEAAK;EIDDSVLGQTGPYR;ENNVVFNR;ESLHEVSK;GEVVEGDPDK;GEVVEGDPDKVLR;GFLSGLLDNVK;IKEGVEEAAK;ILDIDNVDLAMGK;KGFLSGLLDNVK;KLGELTGTVK;LGELTGTVK;LLDISASSTEQIL;MKYDESDNAFIR;QSAESVSK;RLEESDVLQEAR;RTEFAGDK;TEMSEVLTEILR;TIESETVR;VDPAFDKDR;VFEPNEEALGVVLHK;VTDLLGGLFSK
2.05187	1.96638	1.91421	1.99372	2.07338	1.92284	-0.0191565	0.117858	10	10	20.274	O43617	TRAPPC3	Trafficking protein particle complex subunit 3		DYENDEDVNK;DYENDEDVNKQLDK;ETADVIAK;FVQDTLK;FVQDTLKGDGVTEIR;GALEMVQMAVEAK;GDGVTEIR;IEDNLPAGEE;LIEDFLAR;RIEDNLPAGEE
1.60537	1.62488	1.68423	1.72038	1.76448	1.70876	-0.0930478	1.47894	11	11	25.104	O43633	CHMP2A	Charged multivesicular body protein 2a		AEAAASALADADADLEER;AMGTMNR;ANIQAVSLK;KAEAAASALADADADLEER;KIIADIK;KIIADIKK;KTPEELLR;QGQMDAVR;QKLETQEK;SNNSMAQAMK;TPEELLR
0.0477448	0.174507	0.14563	0.0794811	0.495698	0.141138	-0.116145	0.357658	11	10	42.915	O43639	NCK2	Cytoplasmic protein NCK2		DSESSPSDFSVSLK;DTLGLGK;FAYVAEREDELSLVK;GQVGLVPK;GVEGDFLIR;IYDLNIPAFVK;KAPIFTSEHGEK;LWLLDDSK;TEEVIVIAK;TGYVPSNYVER;WDYTAQQDQELDIK
-1.89764	-2.14144	-2.10775	-2.10494	-1.99819	-2.11767	0.0246579	0.104267	2	2	27.563	O43657	TSPAN6	Tetraspanin-6		AITNNQYEIV;DWTDTNYYSEK
1.48864	1.44838	1.48295	1.43221	1.61467	1.40316	-0.0100228	0.0511226	16	16	57.193	O43660	PLRG1	Pleiotropic regulator 1		AVVLHPR;EDDTATEETHPVSWKPEIIK;EKGPQNATDSYVHK;GPQNATDSYVHK;GVIVSTR;HSVHTLVFR;HYTFASGSPDNIK;IWDLASGK;LLTAEADK;LWDLVAGK;MPSESAAQSLAVALPLQTK;QYPANQGQEVEYFVAGTHPYPPGPGVALTADTK;TAPSGSEYR;TGYNFQR;VISGHLGWVR;VYREDDTATEETHPVSWKPEIIK
0.0884247	0.124884	0.0765114	0.05797	0.122586	0.140387	-0.0103744	0.131785	3	3	50.75	O43670	ZNF207	BUB3-interacting and GLEBS motif-containing protein ZNF207		ETIDAVPNAIPGR;ILIQHQK;LIHPDEDISLEER
-3.42651	-3.58232	-3.50636	-3.53252	-3.46614	-3.37917	-0.0457843	0.293335	5	5	21.75	O43674	NDUFB5	NADH dehydrogenase [ubiquinone] 1 beta subcomplex subunit 5, mitochondrial		ELIDHSPK;GDGPWYYYETIDK;GDGPWYYYETIDKELIDHSPK;NFYDSPEK;TMAVLQIEAEK
-0.301647	-0.466297	-0.362514	-0.29562	-0.217341	-0.177835	-0.146554	1.16351	4	4	11.402	O43676	NDUFB3	NADH dehydrogenase [ubiquinone] 1 beta subcomplex subunit 3		IEGTPLETIQK;MELPDYR;SVSFSDVFFK;YMGGFAK
0.0300083	0.0277367	0.0321274	-0.0243282	0.163821	-0.0398865	-0.00324472	0.0164404	5	5	10.921	O43678	NDUFA2	NADH dehydrogenase [ubiquinone] 1 alpha subcomplex subunit 2		ALENVLSGK;ALENVLSGKA;ANPDLPILIR;KANPDLPILIR;YAFGQETNVPLNNFSADQVTR
2.66694	2.58521	2.62552	2.76488	2.73446	2.60871	-0.076794	0.65145	13	13	38.792	O43681	GET3	ATPase GET3		AAGVAGWGVEAEEFEDAPDVEPLEPTLSNIIEQR;ESVLIISTDPAHNISDAFDQK;GADKVNTFSALLLEPYKPPSAQ;GMNFSVVVFDTAPTGHTLR;GRESVLIISTDPAHNISDAFDQK;LEETLPVIR;LIQELAK;LLNFPTIVER;LPLLPHEVR;MMQEAMSAFPGIDEAMSYAEVMR;VNTFSALLLEPYKPPSAQ;WIFVGGK;YLDQMEDLYEDFHIVK
2.85222	2.76565	2.85131	2.86553	2.95854	2.94184	-0.098911	1.14733	14	14	37.154	O43684	BUB3	Mitotic checkpoint protein BUB3		FSPNTSQFLLVSSWDTSVR;LIVGTAGR;LNQPPEDGISSVK;LYDVPANSMR;MHDLNTDQENLVGTHDAPIR;NMGYVQQR;QGYVLSSIEGR;QVTDAETKPK;TGSNEFK;TPCNAGTFSQPEK;VAVEYLDPSPEVQK;VAVEYLDPSPEVQKK;VLVWDLR;VYTLSVSGDR
5.12498	5.08491	5.14552	5.15333	5.35242	5.18469	-0.111678	0.802722	62	45	104.85	O43707	ACTN4	Alpha-actinin-4		ACLISLGYDVENDR;AETAANR;AGTQIENIDEDFR;AGTQIENIDEDFRDGLK;ALDFIASK;ASFNHFDK;ASFNHFDKDHGGALGPEEFK;ASIHEAWTDGK;DDPVTNLNNAFEVAEK;DGLAFNALIHR;DHALLEEQSK;DHGGALGPEEFK;DLLLDPAWEK;DYETATLSDIK;EAILAIHK;ETTDTDTADQVIASFK;FAIQDISVEETSAK;GISQEQMQEFR;GYEEWLLNEIR;GYEEWLLNEIRR;HEAFESDLAAHQDR;HRDYETATLSDIK;HRPELIEYDK;HRPELIEYDKLR;HTNYTMEHIR;IAESNHIK;ISIEMNGTLEDQLSHLK;KAGTQIENIDEDFR;KAGTQIENIDEDFRDGLK;KDDPVTNLNNAFEV…
-0.219181	-0.179691	-0.245218	-0.196747	-0.0224638	-0.149658	-0.0917406	0.761346	8	8	24.212	O43708	GSTZ1	Maleylacetoacetate isomerase		DFQALNPMK;FKVDLTPYPTISSINK;FKVDLTPYPTISSINKR;LLPQDPK;QPDTPTELR;TVPINLIK;VDLTPYPTISSINK;VDLTPYPTISSINKR
-1.6914	-1.70358	-1.75502	-1.72295	-1.53581	-1.78077	-0.0368242	0.183611	5	5	31.88	O43709	BUD23	Probable 18S rRNA (guanine-N(7))-methyltransferase		AGFSGGMVVDYPNSAK;AVLQLYPENSEQLELITTQATK;ESVFTNER;EVRPDTQYTGR;RPEHGGPPELFYDETEAR
2.69628	2.62151	2.58584	2.58891	2.67763	2.56359	0.0245021	0.198582	27	27	85.852	O43719	HTATSF1	17S U2 SnRNP complex component HTATSF1		APEPTDAR;DGDTQTDAGGEPDSLGQQPTDTPYEWDLDKK;DNQGNLK;DPQTEEFK;DPQTEEFKVK;ESEEGNPVR;ESVELALK;GEYDASK;GLEAADK;GLEAADKK;GSEEDSPK;GSEEDSPKK;GWEAFLNAPEANR;HFSEHPSTSK;ITEDFIATYQANYGFSNDGASSSTANVEDVHAR;KAEEGDADEK;KLLLFDR;LHVEVAK;LLDEDEIR;MNAQETATGMAFEEPIDEK;QITAQAWDGTTDYQVEETSR;QLDWRPER;RSDSVSASER;SDSVSASER;SGTNLDGNDEFDEQLR;TAEEPPQEK;TEDGGEFEEGASENNAK
-0.677692	-0.634901	-0.670376	-0.733437	-0.231662	-0.690578	-0.109097	0.271236	6	4	30.302	O43741	PRKAB2	5-AMP-activated protein kinase subunit beta-2		IMVGSTDDPSVFSLPDSK;KSDFEVFDALK;KYVTTLLYKPI;SDFEVFDALK;SEGAGGHAPGK;YVTTLLYKPI
2.63268	2.57172	2.49594	2.57293	2.57751	2.62018	-0.0234296	0.215185	22	22	91.35	O43747	AP1G1	AP-1 complex subunit gamma-1		AVEYNALFK;DDAVPNLIQLITNSVEMHAYTVQR;DLAGEVEK;DLDVSIK;EEDNTYR;FLLNNDK;IEFTFER;IGYLGAMLLLDER;KLVPQLVR;KVPELMEMFLPATK;LVPQLVR;NDDDSSEAMNDILAQVATNTETSK;NLIMSGYSPEHDVSGISDPFLQVR;SPDMLAHFR;SSFREEDNTYR;TSNSYLR;TVQTDHNAVQR;VLAINILGR;VLTTAGSYVR;VVSIYGSSIDVELQQR;WHIDTIMR;YVALTSLLK
-1.27145	-1.3168	-1.28444	-1.26203	-1.28303	-1.25879	-0.0229489	0.67314	7	6	29.176	O43752	STX6	Syntaxin-6		AFITSTR;AVNTAQGLFQR;KFNLDATELSIR;QALLGDSGSQNWSTGTTDK;SMEDPFFVVK;WTELLQDPSTATR
1.00377	0.896645	1.02108	1.00415	1.02289	0.904583	-0.0033776	0.0210489	3	3	25.455	O43759	SYNGR1	Synaptogyrin-1		AGGAFDPYTLVR;DNPLNEGTDAAR;MEGGAYGAGK
-3.34639	-3.38497	-3.11887	-3.5721	-2.564	-3.59805	-0.0386979	0.0374486	1	1	24.81	O43760	SYNGR2	Synaptogyrin-2		MESGAYGAAK
-0.427128	-0.378244	-0.362185	-0.403957	-0.393748	-0.569132	0.0664269	0.480131	3	3	24.555	O43761	SYNGR3	Synaptogyrin-3		AGAALDPVSFAR;RPQTLLR;TAPGPATTQAGDAAR
1.79738	1.74641	1.69277	1.81067	1.88323	1.93624	-0.131196	1.29997	10	10	34.063	O43765	SGTA	Small glutamine-rich tetratricopeptide repeat-containing protein alpha		AIELNPANAVYFCNR;ALELDPDNETYK;EMPQDLR;HVEAVAYYK;KALELDPDNETYK;LKTEGNEQMK;MGLALSSLNK;TPPSEEDSAEAER;TPSASNDDQQE;VENFEAAVHFYGK
-7.81569	-7.82648	-7.82857	-7.717	-7.74593	-7.94607	-0.0205797	0.102608	2	2	41.911	O43766	LIAS	Lipoyl synthase, mitochondrial		ELLQNGPDLQDFVSGDLADR;VALSGLDVYAHNVETVPELQSK
1.79157	1.5369	1.67103	1.73285	1.75276	1.76092	-0.0823431	0.483702	9	8	13.389	O43768	ENSA	Alpha-endosulfine		EGILPERAEEAK;KSSLVTSK;NLVTGDHIPTPQDLPQR;QEEENPAEETGEEKQDTQEK;QLPSAGPDK;SQKQEEENPAEETGEEK;SSLVTSK;YFDSGDYNMAK;YPSLGQKPGGSDFLMK
0.971958	0.914688	0.952822	1.00143	0.973443	0.936098	-0.0238358	0.397998	10	10	32.943	O43772	SLC25A20	Mitochondrial carnitine/acylcarnitine carrier protein		ADQPKPISPLK;EGITGLYR;ELIRDEGVTSLYK;FLNWATPNL;GFNAVMIR;GTVLTLMR;KLYQEFGIR;LYQEFGIR;NIFTPEGK;VSELSAPR
4.0571	4.03931	4.05701	4.10169	4.2331	4.09301	-0.0914583	0.935693	26	24	62.942	O43776	NARS1	Asparagine--tRNA ligase, cytoplasmic		ALMTVGK;EAEDSLR;EAEDSLRR;EDGTFYEFGEDIPEAPER;EGIDPTPYYWYTDQR;EGSDATGDGTK;EHDVKKEDGTFYEFGEDIPEAPER;EKNLEEAK;EKNLEEAKK;EPFPTIYVDSQK;EPFPTIYVDSQKENER;FLTWILNR;GYYEVTPPTLVQTQVEGGATLFK;IFDSEEILAGYK;IFDSEEILAGYKR;IGALEGYR;KEDGTFYEFGEDIPEAPER;LTESVDVLMPNVGEIVGGSMR;MNYSDAIVWLK;NDPSLPEPK;NLMFLVLR;SPAGSIVHELNPNFQPPK;VFGWVHR;VLAELYVSDR;VLAELYVSDREGSDATGDGTK;YGTCPHGGYGLGLER
2.42146	2.35124	2.26552	2.22503	2.40729	2.30713	0.0329275	0.18064	28	26	131.98	O43795	MYO1B	Unconventional myosin-Ib		ALYPSSVGQPFQGAYLEINK;ASHALIK;ASVATLMK;EGSEAASK;EQLLQSNPVLEAFGNAK;FIQGNQK;GAEVNQVK;GDFLFSSDHLIEMATK;GDPLGGVISNYLLEK;IFLLTNNNLLLADQK;IIIAEVVNK;IQHYAGK;IYEFTLQR;LEASELFK;LEDLATLIQK;LFSWLVNR;LGNIEFKPESR;LKDAIEEK;LLEVAVP;RPPTAGSQFK;SEVPLVDVTK;SLFPEGNPAK;SLPIYSPEK;SLPIYSPEKVEEYR;VLYQVEGFVDK;VSTTLNVAQAYYAR;YLGLLENVR;YNYLSLDSAK
-3.83044	-4.00999	-3.96602	-4.0625	-3.69774	-3.85947	-0.0622435	0.202512	3	3	34.566	O43808	SLC25A17	Peroxisomal membrane protein PMP34		AIATTVTYPLQTVQSILR;GIIDAFHQIIR;NILYLLHQR
2.47366	2.40864	2.35794	2.45555	2.52197	2.43951	-0.0589323	0.633274	13	13	26.227	O43809	NUDT21	Cleavage and polyadenylation specificity factor subunit 5		ALFAVPK;DSSVAAR;GVTQFGNK;KLFLVQLQEK;LFLVQLQEK;LMTEILGR;LPGGELNPGEDEVEGLK;LPGGELNPGEDEVEGLKR;MREEFDK;SQTGWPR;TINLYPLTNYTFGTK;TVEGVLIVHEHR;YIQQTKPLTLER
2.42183	2.42376	2.44721	2.42015	2.60569	2.37219	-0.035072	0.186961	5	5	45.283	O43813	LANCL1	Glutathione S-transferase LANCL1		AFPNPYADYNK;ELLQQMER;IDPHAPNEMLYGR;LTPEFSQR;SLAEGYFDAAGR
1.76454	1.77777	1.7817	1.72477	1.99406	1.80804	-0.0676222	0.352282	17	14	86.131	O43815	STRN	Striatin		AELQAQIAFLQGER;ALAFHPIEPVLITASEDHTLK;ALPDSGEDRDTK;DVDELPSLQPSVGSPSRPSSSR;EALKEFDFLVTSEEGDNESR;GLGPLAEAAAAGDGAAAAGAAR;GPLLGHTDAVWGLAYSAAHQR;KGQENLK;LPEHEINR;LWNTTEVAPALSVFNDTK;MLEYALK;QYLQEVGYTDTILDVK;SELTDSASVLDNFK;SHFDGIR;STSLDVEPIYTFR;SVIDTSTIVR
1.16193	1.15061	1.146	1.1093	1.23155	1.07515	0.0141815	0.107302	9	9	51.84	O43818	RRP9	U3 small nucleolar RNA-interacting protein 2		AFEEDQVAGR;DAVSGLAFR;EIQAPASADIR;FSSSGDFLVAGVGQEHR;GKPASGAGAGAGAGK;KPEEEEEEELEETAQEK;LYLEQLR;QQEEEKAEAR;YLASGDR
-2.41698	-2.34634	-2.39214	-2.50838	-2.02884	-2.37828	-0.0799907	0.214851	5	5	29.81	O43819	SCO2	Protein SCO2 homolog, mitochondrial		QAAVGQGDFHLLDHR;QLEAEPGLPPVQPVFITVDPERDDVEAMAR;QVAQASHSYR;SAEQISDSVR;YVQDFHPR
-2.28539	-2.09031	-2.43713	-2.44186	-1.80044	-2.33445	-0.0786924	0.130057	5	5	28.34	O43822	CFAP410	Cilia- and flagella-associated protein 410		ALSEGEEITAAPER;ASELHSVR;ELDAEGLEAVQQTVGSR;GEEVQEHAE;IPSLAELFYLK
-2.27662	-2.30957	-2.43358	-2.36868	-2.03817	-2.32051	-0.0974696	0.357198	6	6	76.107	O43823	AKAP8	A-kinase anchor protein 8		GGSGGGGEGIQDR;GIGQEHFFK;LAAEQFKK;QFQLYEEPDTK;SFDDEEIQK;TVEFLQEYIVNR
-0.318081	-0.442011	-0.439312	-0.267771	-0.151177	-0.263153	-0.172434	1.43493	2	2	46.36	O43826	SLC37A4	Glucose-6-phosphate exchanger SLC37A4		AGLSNYGNPR;NLDPMPSEGKK
-1.40405	-1.34004	-1.47437	-1.57965	-1.21367	-1.40045	-0.00823243	0.0244741	3	3	50.956	O43829	ZBTB14	Zinc finger and BTB domain-containing protein 14		ELGSEEVR;GFTTQAHLK;YNDDDHK
2.30588	2.22587	2.2289	2.26418	2.29253	2.25	-0.0153577	0.204429	17	17	42.183	O43837	IDH3B	Isocitrate dehydrogenase [NAD] subunit beta, mitochondrial		AAAVPVEFQEHHLSEVQNMASEEK;DMGGYSTTTDFIK;EQTEGEYSSLEHESAR;FAFDYATK;GELASYDMR;HNNLDLVIIR;HPFAQAVGR;IHTPMEYK;IHTPMEYKGELASYDMR;KLDLFANVVHVK;LDLFANVVHVK;LEQVLSSMK;NIANPTAMLLSASNMLR;SLPGYMTR;SQAEDVR;SVIGHLQTK;VEGSFPVTMLPGDGVGPELMHAVK
0.308094	0.30146	0.298447	0.254663	0.381938	0.216221	0.0183929	0.135241	15	15	131.7	O43847	NRDC	Nardilysin		AFTTTLNLLPYHK;ALNKGDANSEVTVYYQSGTR;ANLVLLSGANEGK;ETLDTLEK;FFWGNAETLK;FHLISPLIQK;GDANSEVTVYYQSGTR;IEEFLSSFEEK;LAHEIEALK;LGADESEEEGR;LLILEYAR;LVAGEHGLIIR;SDLVNWFK;YIATDFTLK;YPDENGFDAFLK
3.55982	3.45575	3.42195	3.52424	3.52103	3.6558	-0.0878534	0.65412	23	23	37.106	O43852	CALU	Calumenin		DGDLIATK;DGFVTVDELK;DGFVTVDELKDWIK;DIVVQETMEDIDK;DWILPSDYDHAEAEAR;EEFTAFLHPEEYDYMK;EEIVDKYDLFVGSQATDFGEALVR;EQFVEFR;EQFVEFRDK;GHDLNEDGLVSWEEYK;HLVYESDQNK;HLVYESDQNKDGK;IDGDKDGFVTVDELK;IDGDKDGFVTVDELKDWIK;LTKEEIVDK;MADKDGDLIATK;MDKEETKDWILPSDYDHAEAEAR;TFDQLTPEESK;TFDQLTPEESKER;VHHEPQLSDK;VHNDAQSFDYDHDAFLGAEEAK;WIYEDVER;YDLFVGSQATDFGEALVR
2.00438	1.96618	1.96317	1.99876	1.97422	1.91042	0.0167767	0.22204	14	14	53.764	O43854	EDIL3	EGF-like repeat and discoidin I-like domain-containing protein 3		ALFGLQK;DFGHVQFVGSYK;DKVFQGNFDNDTHR;GNIDNNTPYANSFTPPIK;GTNEDMVFR;IAYSNDGK;IGSPEYIK;ILPWSWYGR;NVIDPPIYAR;SGHIQDYQITASSIFR;VFQGNFDNDTHR;VFQGNFDNDTHRK;VTGIITQGAK;VTGVITQGAK
2.72484	2.62553	2.71926	2.7692	2.75537	2.6797	-0.0448783	0.454479	18	11	58.951	O43865	AHCYL1	S-adenosylhomocysteine hydrolase-like protein 1		EIEDAEK;EIEIAEQDMSALISLR;EKQQTNSK;GIVEESVTGVHR;KMDEYVASLHLPSFDAHLTELTDDQAK;KQIQFADDMQEFTK;KYPNVFK;NGPFKPNYYR;QDVYLLPK;QIQFADDMQEFTK;SMPDAMPLPGVGEELK;SQVDHVIWPDGK;SQVDHVIWPDGKR;TPELTWER;TTDVMFGGK;VVLLAEGR;YKQDVYLLPK;YSFMATVTK
-3.80574	-3.54913	-3.85731	-3.9049	-3.38855	-3.87221	-0.0155077	0.0270682	10	3	122.95	O43896;Q9P2P6	KIF1C	Kinesin-like protein KIF1C		AEIEALAALK;DSVLTWLLK;EHPILGPYVQDLSK;EKEEADLLLEQQR;ELLEQQGIDIK;ENLGGNSR;FNHPEQAR;IIAELNETWEEK;LKEGANINK;SLTTLGK
-4.9328	-4.89774	-4.76099	-5.46233	-5.15425	-6.04909	0.691382	1.21382	4	4	104.75	O43909	EXTL3	Exostosin-like 3		EDRLELLK;ELMAQNQPK;ESVSEELLQLEAK;LPSEDLLWPDIGVPIMVVR
-1.87221	-1.77608	-1.77969	-1.97513	-1.84651	-1.80445	0.0660353	0.475794	5	5	50.282	O43913	ORC5	Origin recognition complex subunit 5		DMEANLLPGFLR;EISSSQWEK;ESQVSILQSLFGER;HLAVLNFPK;TVNFDIIK
-0.501926	-0.785646	-0.753012	-0.666191	-0.623174	-0.481316	-0.089968	0.354311	4	4	12.517	O43920	NDUFS5	NADH dehydrogenase [ubiquinone] iron-sulfur protein 5		FGLNIDR;PFLDIQK;WLTIQSGEQPYK;YTPPPHHIGK
0.741007	0.74087	0.710106	0.702824	0.899943	0.627089	-0.0126244	0.0530285	4	4	17.42	O43924	PDE6D	Retinal rod rhodopsin-sensitive cGMP 3,5-cyclic phosphodiesterase subunit delta		ELNFSSTEQMEK;FFDDDLLVSTSR;ILWQGTEDLSVPGVEHEAR;LNWMNLR
-0.515625	-0.516541	-0.542824	-0.525942	-0.422286	-0.592173	-0.0115296	0.0810642	7	7	50.377	O43929;CON__Q2YDI2	ORC4	Origin recognition complex subunit 4		AFEHLQQLELIKPMER;EQLSLPAEFPDK;EQLSLPAEFPDKVFAEK;LDILELLEK;LLLDNTQIMNALQK;QLNLENVVGDK;SVQEVLQK
-1.36477	-1.19341	-1.31069	-1.37955	-0.88527	-1.28296	-0.107027	0.268467	5	5	142.87	O43933	PEX1	Peroxisomal ATPase PEX1		EENSEEIDFILPFLK;QRTGILLYGPPGTGK;SVNLHKPR;TGILLYGPPGTGK;VVPLDNIFR
1.53905	1.42854	1.41104	1.44916	1.55131	1.49687	-0.0395683	0.326925	21	19	71.689	O60216	RAD21	Double-strand-break repair protein rad21 homolog;64-kDa C-terminal product		AQLSDYSDIVTTLDLAPPTK;AQLSDYSDIVTTLDLAPPTKK;DVIDEPIIEEPSR;EDQQQQHQQR;EFENPEVPR;EFENPEVPREDQQQQHQQR;EGSAFEDDDMLVSTTTSNLLLESEQSTSNLNEK;EKEKEDDEEEEDEDASGGDQDQEER;ETGGVEK;FYSFLVLK;GGEADNLDEFLK;IWLAAHWDK;KGGEADNLDEFLK;KQQAIELTQEEPYSDIIATPGPR;LFSLPAQPLWNNR;LIVDSVK;LQESVMEASR;MAFRPGVVDLPEENR;QQAIELTQEEPYSDIIATPGPR;TQQMLHGLQR;TSGHLLLGVVR
-3.15263	-3.10202	-3.10465	-3.18768	-2.94177	-3.20016	-0.00989087	0.0391968	8	4	340.26	O60229	KALRN	Kalirin		AEVLLQAGHYDADAIR;DFLNALQSPIEYQR;EFIMAELLQTEK;EGEDLIQQLR;GGPILTFPAR;HLQAEVK;LLIQLADSFVEK;LTLSDFLIKPIQR
1.42467	1.42277	1.39125	1.38897	1.50323	1.38768	-0.0137351	0.126421	27	26	119.26	O60231	DHX16	Pre-mRNA-splicing factor ATP-dependent RNA helicase DHX16		AAGEQEK;AAGEQEKLEATNR;AITAGYFYHTAR;ATQLQGDEEPSAPPTSTQAQQK;AVDLVEEESGAPGEEQR;AVVEKPAR;DAASQEPK;EFLSEPDLASYSVVMVDEAHER;ELEDPHAK;ELLVLPIYANLPSDMQAR;EQLEGLLER;ESIQAVR;FPVDIFYTK;FSTFFDDAPVFR;HVAQFLIGTAQR;IFQPTPPGAR;LGNEVGYSIR;LRDTDTLDLSGPAR;RFPVDIFYTK;SLPVFPFR;TLHTDILFGLIK;TSLGNVVLLLK;TTQIPQYLFEEGYTNK;VVHADNAR;WLLYHELVLTTK;WVQDELHSVLGLSER;YMTDGMLLR
-1.10161	-1.04305	-1.14956	-1.0631	-1.05946	-1.18035	0.00289758	0.019187	6	6	48.226	O60243	HS6ST1	Heparan-sulfate 6-O-sulfotransferase 1		AGGVEVDEDTIR;APPDDLDLFPTPDPHYEK;AQLLLESAK;GDDVIVFLHIQK;GMAFFGLTEFQR;HLVQNVR
-1.77884	-1.62566	-1.59987	-1.78092	-1.26944	-1.69135	-0.087554	0.201772	12	12	160.6	O60244	MED14	Mediator of RNA polymerase II transcription subunit 14		ANTLIAFTK;AYSELMVLTDLLPR;DALVHAR;GITEETQK;IDHLSIEK;IIPWIQQLK;LELSNLEIPHQGVQVEGDGFSHAIR;LLIDSVHAR;LPSFAIPYAIDVLTTGSYPR;LVEGFYPAPGLK;SLPDIPAHLNIFSEVR;VTPENAGQWKPDELQVLEK
-6.60564	-6.57369	-6.65444	-6.69001	-6.5542	-6.70342	0.037955	0.288628	2	2	116.07	O60245	PCDH7	Protocadherin-7		LFEIDPTSGVVSLVGK;SVYEADLAENSAPGTPILQLR
2.65126	2.53475	2.53822	2.59428	2.68312	2.58334	-0.0455033	0.386052	15	13	40.925	O60256	PRPSAP2	Phosphoribosyl pyrophosphate synthase-associated protein 2		AGLTHLITMDLHQK;ASPFLLQYIQEEIPDYR;EIQGFFNIPVDNLR;EKPPITVVGDVGGR;GKDVFIIQTVSK;IEESAIDEVVVTNTIPHEVQK;IFVMATHGLLSSDAPR;LGVEMGK;NAVIVAK;RIEESAIDEVVVTNTIPHEVQK;SIIGVIPYFPYSK;SVAAIHPSLEIPMLIPK;TVDISMILSEAIR;VQIQESVR;VQVYQEPNR
-0.435146	-0.669687	-0.687937	-0.585094	-0.572858	-0.493423	-0.0471315	0.211783	1	1	28.048	O60259	KLK8	Kallikrein-8		LGDHSLQNK
0.161812	0.2339	0.34708	0.284828	0.567616	0.365698	-0.15845	0.726129	6	5	7.5217	O60262	GNG7	Guanine nucleotide-binding protein G(I)/G(S)/G(O) subunit gamma-7		IEAGIER;KLVEQLR;NDPLLVGVPASENPFK;NDPLLVGVPASENPFKDK;SATNNIAQAR
3.90484	3.84566	3.83115	3.88946	3.9707	3.92323	-0.0672496	0.966055	51	35	121.9	O60264	SMARCA5	SWI/SNF-related matrix-associated actin-dependent regulator of chromatin subfamily A member 5		ANRFEYLLK;ANYAVDAYFR;APFHQLR;DDIENIAR;DFNQFIK;DIDILNSAGK;EEQLKIDEAESLNDEELEEKEK;EIQEPDPTYEEK;ENMELEEKEK;ESEITDEDIDGILER;FEDSPSYVK;FITDNTVEER;GPKPSTQK;HGATHVFASK;IAFTEWIEPPK;IAFTEWIEPPKR;IDEAESLNDEELEEKEK;IGKDEMLQMIR;ISYGTNK;IYVGLSK;KANYAVDAYFR;KTAEMNEK;LDGQTPHDER;LDSIVIQQGR;LFELLEK;LGFDKENVYDELR;LLNILMQLR;LLTQGFTNWNK;LLTQGFTNWNKR;LRLDSIVIQQGR;LVDQNLNK;MGESSLR;NIPGPHMVLVPK;NPELPNAAQAQK;QDSINAYNEPN…
-0.375616	-0.38739	-0.496197	-0.449984	-0.426854	-0.509113	0.0422494	0.391508	6	6	46.638	O60268	KIAA0513	Uncharacterized protein KIAA0513		AVTAYSPEDEK;EKPAGSIDSYLK;GFFGGLETK;IFSGGEDLDQEEK;QAVIGNLDEEQYK;QQPIWHTLR
2.21854	2.20201	2.17947	2.15318	2.37051	2.21825	-0.0473064	0.292932	30	25	146.2	O60271	SPAG9	C-Jun-amino-terminal kinase-interacting protein 4		AFDFLSEETEASLASR;AGPSAQEPGSQTPLK;AKDDDDSDIPTAQR;DGGSVVGASVFYK;DVLQGELEAVK;ELEEELRK;ENPAMQEK;ERPISLGIFPLPAGDGLLTPDAQK;ETDYPAGEDLSESGQVDK;EVENLILENTQLLETK;EYNALHQR;FFVAVPGQVISPQSSSSGTDLTGDK;FIEFEDSQEQEK;FIEFEDSQEQEKK;FQELSQPR;GGETPGSEQWK;GSSTPTK;HIEVQVAQETR;LFSSSSNTTK;LGFSFVR;LMELQEAVR;LYHAHTYQHLQDVDIEPYVSK;MGDEGGESELLGEDLPLEPSVTK;SFDAHPR;SSTLSQLPGDK;VESLESQTR;VQAFGWSLPQK;VSGLAGSIYR;VTDAPNKSEISK;YN…
-4.17186	-3.94766	-4.06653	-4.22162	-3.68269	-4.13323	-0.0495011	0.0991791	3	3	304.81	O60281	ZNF292	Zinc finger protein 292		AETQNTHSNVAVIPEK;FLEESAVK;QLAMTEENK
3.38208	3.35991	3.33537	3.31541	3.4855	3.3657	-0.029748	0.222302	56	36	109.49	O60282	KIF5C	Kinesin heavy chain isoform 5C		ALEQQMESHR;ALESALK;ANEQLTDELAQK;ATEILNLLLK;DLGEIGGIIGTNDVK;DLLDVSK;DVLEGYNGTIFAYGQTSSGK;EDLKGLEETVSR;EKYDEEISSLYR;ELQTLHNLR;ELQTLHNLRK;ELSQLQELSNHQK;EVLQALEELAVNYDQK;FKGDETVVIGQGKPYVFDR;FRPLNEAEILR;FVSSPEEVMDVIDEGK;GGGGSSSNSTHYQK;GLEETVSR;HVAVTNMNEHSSR;IIDEIRDLNQK;IRDLLDVSK;ISFLENNLEQLTK;LFVQDLTTR;LHDPQLMGIIPR;LKQQMLDQDELLASTR;LLLLNDK;LLLLNDKR;LQDAEEMKK;LQIENEAAKDEVK;LQLEQEK;LRDEIEEK;LSSDYNK;LYLV…
-3.86057	-3.49964	-3.5887	-3.7658	-3.08362	-3.83907	-0.0868066	0.119929	7	7	254.39	O60287	URB1	Nucleolar pre-ribosomal-associated protein 1		AEAAGLIGWLK;DVLVLLHK;EDVYDVVEGYIK;FQEQSQLLYLLDVVR;LLPPEDTQELIFK;QAYVQFALSFLIAGDDSTIVQVLEVK;VSAEEAGK
-0.0795059	-0.130775	-0.139507	-0.110167	0.00772953	-0.103676	-0.0478919	0.489766	6	6	60.752	O60291	MGRN1	E3 ubiquitin-protein ligase MGRN1		APDSTLR;GVSQQFSLPSFK;IAGVEDIDIQANSAYR;SPSLQSETVHYK;VSYLLQEIYGIENK;YKDDADSPTEDGDKPR
-3.28354	-3.24119	-3.08171	-3.26256	-3.04054	-3.4139	0.0368567	0.106713	2	1	194.61	O60292	SIPA1L3	Signal-induced proliferation-associated 1-like protein 3		GSILEDATPTATK;VINAENAAHK
-6.10621	-5.96692	-5.56539	-5.85377	-5.54555	-5.84712	-0.130692	0.27399	1	1	71.79	O60299	LZTS3	Leucine zipper putative tumor suppressor 3		SLEQSEAAVAQVLEER
-7.87117	-7.75567	-7.71299	-7.8751	-7.53602	-7.82895	-0.0332499	0.102924	3	3	180.92	O60303	KATNIP	Katanin-interacting protein		GEPVQISNIK;IPLSENNIAAFPDSVNSLEGVGGDVR;ISNTELPGDILDELLQQK
1.73777	1.78981	1.51205	1.47667	1.49686	1.41708	0.216342	1.14899	20	20	171.29	O60306;REV__Q5JR59;REV__Q9NZM3	AQR	RNA helicase aquarius		AAFAHFPELYDFALSNVAEVDTR;AAPAQPK;ASFPGHNVK;DADVEDEDTEEAK;FLSQLIQK;GPYPYNQPK;KSPFDIK;LELELKK;LESTYEIR;LGHGEEELETEKDFSR;QDIEDSVSR;RIELLEEVK;TLIVEPHVIPNR;TLIVTHSNQALNQLFEK;VGVPTVDLDAQGR;VIEDGPEPRPNLR;VIEDIYEK;VTVEDPALQIPPFR;WEEYISK;WIMIGDHHQLPPVIK
3.48345	3.43667	3.45069	3.44587	3.52876	3.39622	-9.21885e-06	7.31196e-05	49	49	111.63	O60313	OPA1	Dynamin-like 120 kDa protein, mitochondrial;Dynamin-like 120 kDa protein, form S1		AAVACEVCQSLVK;AHQVTTR;AKNEILDEVISLSQVTPK;ALGYFAVVTGK;ALPSSEDLVK;AVEVAWETLQEEFSR;DFFTSGSPEETAFR;DMIPDLSEYK;DTWHQVYR;EAVKEESIK;EAVKEESIKR;EEDLAALR;EFDLTKEEDLAALR;EGCTVSPETISLNVK;EHDDIFDKLK;ELDRNELFEK;ESVEQQADSFK;ETIFSISK;EVLEDFAEDGEK;EVLEDFAEDGEKK;EYEEEFFQNSK;FNLETEWK;GFYYYQR;GKEHDDIFDK;GKEHDDIFDKLK;GNSSESIEAIR;GNSSESIEAIREYEEEFFQNSK;GVEVDPSLIK;GVEVDPSLIKDTWHQVYR;HWEEILQQSLWER;IDQLQEELLHTQLK;IQQIIE…
-1.91373	-1.78324	-1.61679	-1.88805	-1.5906	-1.79373	-0.0137911	0.0381013	9	9	218.4	O60318	MCM3AP	Germinal-center associated nuclear protein		EVQQFHPAVR;GLLDLGHAGR;HIAAEEVSK;ILANWLK;LISDYTVTEIPDTINDLQGSTK;SAFLEPEGLSK;SQLSVFEVVPGTDQVDHAAAVK;SSADQEEPLPHELRPLPVLSR;VAHGALSDGAIDAVETQK
0.647764	0.746593	0.708218	0.710466	0.785148	0.634544	-0.00919437	0.0611941	15	13	73.259	O60331;O14986	PIP5K1C	Phosphatidylinositol 4-phosphate 5-kinase type-1 gamma		ALVHDGDTVSVHRPSFYAER;ALYSTAMESIQGGAAR;EAEFLQK;EEAQYDLR;GGALLAVKPLGPTAAFSASQIPSER;GGALLAVKPLGPTAAFSASQIPSEREEAQYDLR;GVDASGETTYK;GVDASGETTYKK;IMDYSLLLGVHNIDQHER;KLEHTWK;LLPGYYMNLNQNPR;MELEVPDEAESAEAGAVPSEAAWAAESGAAAGLAQK;QAQGAQSTSDEK;QAQGAQSTSDEKRPVGQK;VVVMNNILPR
-0.586147	-0.451729	-0.638855	-0.777861	-0.0309496	-0.626514	-0.0804688	0.12555	28	11	204.47	O60333	KIF1B	Kinesin-like protein KIF1B		ADSTGAK;DSVLTWLLR;EANAISVELK;EDGGTLGVFSPK;EHPLLGPYVEDLSK;EKEEADLLLEQQR;EKTPSAETPSEPVDWTFAQR;ENLGGNSR;FNHPEQAR;GEENLAGWRPR;HDEAFSTEPLK;IIAELNETWEEK;KTDFIPYR;LAVTSYTDIADLMDAGNK;LELLHEVEK;LKEGANINK;LQEMEILYKK;SGLSLEELR;SLTTLGK;SPWFILVGR;TAMVAALSPADINYDETLSTLR;TPNTFAVCTK;TPSAETPSEPVDWTFAQR;TVVAVEVQDLK;VAIVSEK;VAVQAIAADEEAPDYGSGIR;VRPFNSR;VSQPVQLR
-2.83826	-2.62539	-2.94078	-2.96616	-2.58055	-2.9291	0.0237907	0.0532024	1	1	102.54	O60337	MARCHF6	E3 ubiquitin-protein ligase MARCHF6		AAEELTWER
2.21055	2.21614	2.1428	2.18574	2.35571	2.21478	-0.0622498	0.468297	25	25	92.902	O60341	KDM1A	Lysine-specific histone demethylase 1A		ASPPGGLAEPPGSAGPQAGPTVVPGSATPMETGIAETPEGR;DITAEFLVK;EASEVKPPR;EKDEMVEQEFNR;ELHQQYK;EYDELAETQGK;EYDELAETQGKLEEK;GIFGSSAVPQPK;GSYSYVAAGSSGNDYDLMAQPITPGPSIPGAPQPIPR;HGLINFGIYK;HVKDEQIEHWK;IADQFLGAMYTLPR;IKELHQQYK;LFFAGEHTIR;LQELEANPPSDVYLSSR;NYPATVHGALLSGLR;QLQSFGMDVTLLEAR;QQPPAVQFVPPLPEWK;QVNMELAK;STSQTFIYK;TLQLWLDNPK;TQEELKELLNK;VFWDPSVNLFGHVGSTTASR;VHSYLER;VIIIGSGVSGLAAAR
-3.27146	-3.04596	-3.1357	-3.20685	-3.15275	-3.16999	0.0254889	0.139814	4	4	51.964	O60427	FADS1	Acyl-CoA (8-3)-desaturase		APDPVAAETAAQGPTPR;ILSVELGK;VISHYAGQDATDPFVAFHINK;VYNISEFTR
-2.2696	-2.21256	-2.24198	-2.45533	-2.33181	-2.3571	0.140034	1.56655	7	7	204.74	O60437	PPL	Periplakin		EAEVLLLQQR;ELSELIEQLQK;EVDPQVNWAALVEEK;EVVQEILQFQEDPQTK;KVPDPVLEESFQQLQR;LQLEEEQHR;SLLGEVEQNLQAAK
-2.15471	-2.1652	-2.17836	-2.16979	-1.89172	-1.97291	-0.154615	0.868434	7	7	54.554	O60443	GSDME	Gasdermin-E;Gasdermin-E, N-terminal;Gasdermin-E, C-terminal		ALSDDGVSDLEDPTLTPLK;ALSDDGVSDLEDPTLTPLKDTER;EVDADGDLIAVSNLNDSDK;IDSVYLDPLVFR;KQEVDLQQLIR;LQLLSLVTK;VESQSSFGTLR
-2.06891	-1.94396	-1.98852	-2.16916	-1.61726	-2.09383	-0.0403846	0.0807422	9	8	73.003	O60476	MAN1A2	Mannosyl-oligosaccharide 1,2-alpha-mannosidase IB		AGHYLELGAEIAR;AWLMSDK;DVYSSTPTHDDVQQSFFLAETLK;FDLGLEDVLIPHVDAGK;GGDPEDNDIR;GGLTFIGEWK;HREEEER;LGPESFK;RFDLGLEDVLIPHVDAGK
-3.44946	-3.17539	-3.14855	-3.3035	-2.73405	-3.1799	-0.18532	0.395783	3	2	175.74	O60486	PLXNC1	Plexin-C1		ELLDIDSSSVILEDGITK;ETVGEPFYLLVTTLNQK;FWVNILK
1.18953	1.1481	1.12028	1.15994	1.20375	1.03936	0.0182823	0.126101	13	12	79.187	O60488	ACSL4	Long-chain-fatty-acid--CoA ligase 4		AKPTSDKPGSPYR;EAVVHGLNESEASYLITSVELLESK;GEIVIGGQNISMGYFK;HIIYVDNK;IGYSSPLTLSDQSSK;KLILGNYK;LFDHAVSK;LILGNYK;LKDWQEGGYTINDKPNPR;LSPEPWTPETGLVTDAFK;LTLLAQQK;SDQSYVISFVVPNQK;SVTHFDSLAVIDIPGADTLDK
-0.0923176	-0.147465	-0.140343	-0.14967	0.108836	-0.0430756	-0.0987387	0.570427	10	8	18.762	O60493	SNX3	Sorting nexin-3		AETVADTR;AETVADTRR;GDDGIFDDNFIEER;KQGLEQFINK;QGLEQFINK;QLPFRGDDGIFDDNFIEER;TNLPIFK;VAGHPLAQNER;VVVPPLPGK;YSDFEWLR
2.29946	2.33639	2.3328	2.3042	2.45153	2.38926	-0.0587797	0.593256	29	29	102.91	O60502	OGA	Protein O-GlcNAcase		APVIWDNIHANDYDQK;APVIWDNIHANDYDQKR;DEASVYK;DVVILGR;EIPVESIEEVSK;EMYDDGVGLPFQSQPDLIGDK;EMYSVEEAEQLMTLISAAR;ESELSSNPAASAGASLEPPAAPAPGEDNPAGAGGAAVAGAAGGAR;ESQATLEER;EVSTLKR;GGLAGEFQR;ILEFYSK;ISWIPFMQEK;KVTDPSVAK;LALTEWLQEFGVPHQYSSR;LENEGSDEDIETDVLYSPQMALK;LFLGPYK;LLPGIEVLWTGPK;LLPIDGANDLFFQPPPLTPTSK;MAEELKPMDTDKESIAESK;NDNQILSEIVEAK;QEETDHKNDNQILSEIVEAK;QVAHSGAK;RAPVIWDNIHANDYDQK;RAPVIWDNIHANDYDQKR;…
-0.765234	-0.762331	-0.816042	-0.763624	-0.495269	-0.566889	-0.172608	0.985617	6	6	75.34	O60504	SORBS3	Vinexin		AMYQYRPQNEDELELR;DFVYPSSTR;EVDKNWLEGEHHGR;FGTFPGNYVAPV;GDIVYIHK;LKFDFQAQSPK
3.37248	3.26776	3.33712	3.38409	3.51172	3.44831	-0.122251	1.19727	34	26	69.602	O60506	SYNCRIP	Heterogeneous nuclear ribonucleoprotein Q		ADGYNQPDSK;AFSQFGK;AGPIWDLR;AIEALKEFNEDGALAVLQQFK;AMEEMNGKDLEGENIEIVFAKPPDQK;DLEGENIEIVFAKPPDQK;DLFEDELVPLFEK;DSDLSHVQNK;DYAFIHFDER;DYAFIHFDERDGAVK;EAAQEAVK;EFNEDGALAVLQQFK;EQILEEFSK;GFCFLEYEDHK;KADGYNQPDSK;KADGYNQPDSKR;KYGGPPPDSVYSGQQPSVGTEIFVGK;LDEIYVAGLVAHSDLDER;LFVGSIPK;LKDYAFIHFDER;LKDYAFIHFDERDGAVK;LMMDPLTGLNR;LYNNHEIR;NLANTVTEEILEK;SENQEFYQDTFGQQWK;TGYTLDVTTGQR;TKEQILEEFSK;VADSSKGPDEAK;VAE…
-0.801033	-0.756002	-0.844963	-0.885056	-0.530993	-0.778809	-0.069047	0.253855	12	12	65.521	O60508	CDC40	Pre-mRNA-processing factor 17		ENDASNIDGFLGPWAK;EVQYNPTYETMFAPEFGPENPFR;FKENDASNIDGFLGPWAK;FNPDEDKQNLFVAGMSDK;FVSTSDDK;HLGAVNTIVFVDENRR;SGEIVQEYDR;SYLHIPQDVGVNLR;TFIGHSK;VWEWDIPVDFK;YIGSVEEAEK;YIGSVEEAEKNQGLTVFETGQK
-1.24457	-1.36013	-1.48413	-1.40345	-1.30216	-1.47939	0.0320539	0.137468	5	5	40.041	O60513	B4GALT4	Beta-1,4-galactosyltransferase 4		ISRPLPEVGK;LIFKPDLTLEEVQAENPK;LLHQVSR;QQLDYGIYVIHQAEGK;VAILVPHR
0.125343	0.223433	0.223965	0.130774	0.431811	0.137178	-0.0423409	0.151035	15	13	124.71	O60518	RANBP6	Ran-binding protein 6		AAAAFVLANENNIALFK;AATASAGVPATVSEK;AIGTEPDTDVLSEIMNSFAK;DFQQYLPLVIEPLIK;EGFVEYTEQVVK;FLIDSIYSK;FYFHDNVR;HDLDIIK;HDLDIIKR;HIVELAVQK;IISIIAEGK;LLSSGFEEVYPNLPADVQR;LMVPLLK;NLIDEDGTNHWPEGLK;QEFYQLLK
1.41709	1.39319	1.36321	1.41712	1.58147	1.4869	-0.103999	0.972397	13	13	122.95	O60524	NEMF	Ribosome quality control complex subunit NEMF		AAEPLLTLER;ATLLLESGIR;AVDEFYSK;DQQQNEIIVK;EAQAQGDPVASAIK;KVYWFEK;LLGSAGSNKEEK;LQKPDFK;LTEIVASAPK;LTPGVQK;TVEAAEK;VDEKLETK;VSAPNLLNVK
0.530281	0.529991	0.666533	0.524643	0.697595	0.639982	-0.0451384	0.264165	8	8	41.949	O60547	GMDS	GDP-mannose 4,6 dehydratase		FYQASTSELYGK;GSGDGEMGKPR;GYEVHGIVR;ISFDLAEYTADVDGVGTLR;SFLHIGK;SSSFNTGR;TIVWEGKNENEVGR;VQEIPQK
-3.63066	-3.64037	-3.56092	-3.74437	-3.38935	-3.65873	-0.013168	0.040784	6	3	56.98	O60551	NMT2	Glycylpeptide N-tetradecanoyltransferase 2		ELYTLLNENYVEDDDNMFR;GFDVFNALDLMENK;LDEVITSHGAIEPDKDNVR;LVGFISAIPANIR;QFHLAPVMDEEEVAHWFLPR;VAPVLIR
-0.176241	-0.160387	-0.113115	-0.138556	0.0110312	-0.19105	-0.0437231	0.276889	8	8	80.684	O60563	CCNT1	Cyclin-T1		AASSKPEEIK;ADDRGTDEK;EQLENSPSR;FGVDPDKELSYR;GPSEETGGAVFDHPAK;HAEELAAQK;IPVAGGDK;MPIEGSENPERPFLEK
1.3739	1.30802	1.48501	1.36579	1.46462	1.41074	-0.0247361	0.156978	17	17	84.784	O60568	PLOD3	Multifunctional procollagen lysine hydroxylase and glycosyltransferase LH3;Procollagen-lysine,2-oxoglutarate 5-dioxygenase 3;Procollagen glycosyltransferase		AVMNFVVR;FVQSGSR;GRDPVNPEK;ILIEENRK;KGWALLHPGR;LAGGYENVPTVDIHMK;LLLLDYPPDR;LLVITVATAETEGYLR;LSLNLDHK;LTHYHEGLPTTWGTR;LVGPEEALSPGEAR;QVGYEDQWLQLLR;SEDYVELVQR;TLPGGQPPPR;VGVWNVPYISQAYVIR;VIAPMLSR;YKDDDDDQLFYTR
-1.90237	-1.88004	-1.95875	-1.98725	-1.82876	-1.85737	-0.0225897	0.156331	8	8	28.362	O60573	EIF4E2	Eukaryotic translation initiation factor 4E type 2		AVVPGPAEHPLQYNYTFWYSRR;FDALKDDDSGDHDQNEENSTQK;FQEDIISIWNK;QIGTFASVEQFWR;RTPGRPTSSQSYEQNIK;TASDQATTAR;THTDSIK;VLNLPPNTIMEYK
1.38573	1.42639	1.38559	1.38799	1.62458	1.48671	-0.100523	0.649751	27	27	141.35	O60610	DIAPH1	Protein diaphanous homolog 1		AEMDEVER;AMDPAVPNMMIDAAK;DALHSEK;DVQNFPAATDEKDKFVEK;EIENEDMR;ELEDAKK;ELGEYFLFDPK;EMVSQYLYTSK;FPDELAHVEK;FQPLLDGLK;KLYKPEVQLR;KMESDFEQK;LGLHQVLQDLR;LHDEKEETAGSYDSR;LNAILFK;LQDLQGEKDALHSEK;LRMMHSNMETLYK;LYKPEVQLR;NSETFPTILEEAK;QDLEAEVSQLTGEVAK;SPDELPSAGGDGGK;TAQNLSIFLGSFR;TMLETEEGILLLVR;VKEDRFENNELFAK;VLEAMTER;VQLNVFDEQGEEDSYDLK;VSAENLQK
-0.487165	-0.457272	-0.51342	-0.452694	-0.360921	-0.41992	-0.0747741	1.12097	3	3	18.092	O60613	SELENOF	Selenoprotein F		GSDPVLK;LLDDNGNIAEELSILK;WNTDSVEEFLSEK
-0.51173	-0.433538	-0.55941	-0.538647	-0.258145	-0.641771	-0.0220385	0.0636815	3	3	28.017	O60637	TSPAN3	Tetraspanin-3		AIDYVQR;DPAYELLITGGTYA;SRDPAYELLITGGTYA
2.95334	2.89378	2.90576	2.8821	2.94164	2.89957	0.00985495	0.144267	23	20	92.501	O60641	SNAP91	Clathrin coat assembly protein AP180		ALGSDLDSSLASLVGNLGISGTTTK;ALVTTHHLMVHGNER;ATNSSWVVVFK;ATTHEVMGPK;DALEIYK;DPLADLNIK;DPLADLNIKDFL;FIQYLASR;GADGVMR;GDIPDLTQAPSSLMETLEQHLNTLEGK;HLDYLIQATNETNVNIPQMADTLFER;IAAAQYSVTGSAVAR;KGADGVMR;KGDLQWNAGEK;KLTGGANWQPK;KPGNNEGSGAPSPLSK;KPPAKDPLADLNIKDFL;LTGGANWQPK;NTLFNLSNFLDK;SGQTLTDR;SGSHGYDMSTFIR;SSPATTVTSPNSTPAK;VAEQVGIDK
1.60682	1.62263	1.69689	1.60594	1.67737	1.58548	0.0191793	0.186212	19	19	85.566	O60645	EXOC3	Exocyst complex component 3		AAIQSQLDGVR;DAVVQHSQLAAAVENLK;DIQQSLADVSK;DIVVPSLNVAK;EAVATAVQR;ESIVSLK;ETQDLIEQGALLQAHR;IEGTQADTR;IIEREEK;KYVLDDLIVAK;LTDPSLLYLEVSTLVSK;NEVEEGVSPSQPSMDGILDAIAK;NIFSVPEIVR;QSINTIESLK;RDPTLLVSVVR;VVVEYLR;YKDEAQLYKEEHLR;YPDIRDDHIGALLAVR;YVLDDLIVAK
0.594246	0.586216	0.540615	0.57325	0.667499	0.606346	-0.0420059	0.580283	11	11	68.036	O60662	KLHL41	Kelch-like protein 41		DHVEKDDIIK;DLLDEKK;EFAPTEVNDIWK;ELAEELR;EVVLDNVDPAILDLIIK;EYFLSEIDEAK;LYQSTLLQDGLK;SMFGVAVHK;SNPDLQK;VFIFNPK;YFKDHVEKDDIIK
2.34818	2.2441	2.49299	2.25611	2.46188	2.31395	0.0177749	0.0653972	20	20	47.074	O60664	PLIN3	Perilipin-3		DQVQQAR;DTVATQLSEAVDATR;EPPKPEQVESR;GAVQSGVDK;GLDKLEENLPILQQPTEK;IATSLDGFDVASVQQQR;LEENLPILQQPTEK;LEPQIASASEYAHR;LGQMVLSGVDTVLGK;LGSLSER;LVEGQEK;QEQSYFVR;QLQGPEK;QLQGPEKEPPKPEQVESR;QVEDLQATFSSIHSFQDLSSSILAQSR;SADGAEADGSTQVTVEEPVQQPSVVDR;SEEWADNHLPLTDAELAR;SVVTGGVQSVMGSR;TLTAAAVSGAQPILSK;VSGAQEMVSSAK
-2.3992	-2.21882	-2.09241	-2.37	-2.40383	-2.4629	0.175436	0.877768	2	2	130.67	O60674	JAK2	Tyrosine-protein kinase JAK2		IGALGFSGAFEDRDPTQFEER;YDPLQDNTGEVVAVK
-3.3735	-3.28805	-3.07283	-3.41517	-3.14083	-3.38088	0.0675027	0.210479	5	5	59.902	O60678	PRMT3	Protein arginine N-methyltransferase 3		ALSAEAALAR;AVIPEAVVEVLDPK;LNKLEDTITLIK;QTVFLLEKPFSVK;VLGVDQSEILYQAMDIIR
-6.32143	-6.51731	-6.67129	-6.47406	-5.71358	-6.42761	-0.29826	0.487943	2	2	37.069	O60683	PEX10	Peroxisome biogenesis factor 10		ALLPLEQELQADPDSGRPLQGSLGPGGR;SLPGEDLR
1.04129	1.09871	1.08304	1.07646	1.22724	1.07896	-0.053209	0.431929	10	5	60.029	O60684	KPNA6	Importin subunit alpha-7		EAAWAITNATSGGTPEQIR;EPSPPIDEVINTPR;FVEFLKR;GKNPPPEFAK;IEFLQSHENQEIYQK;KEAAWAITNATSGGTPEQIR;LGEQEGKR;LLSKEPSPPIDEVINTPR;LVELLMHNDYK;VASPALR
1.94618	1.88242	1.86487	1.92083	2.0709	1.99611	-0.0981239	0.918972	19	19	55.023	O60701	UGDH	UDP-glucose 6-dehydrogenase		EADLVFISVNTPTK;EQIVVDLSHPGVSEDDQVSR;ESSSIYISK;FSLQDPPNK;IAILGFAFK;IFDANTKPNLNLQVLSNPEFLAEGTAIK;IIDSLFNTVTDK;IIDSLFNTVTDKK;ILTTNTWSSELSK;INAWNSPTLPIYEPGLK;LAANAFLAQR;MLKPAFIFDGR;NLFFSTNIDDAIK;RIPYAPSGEIPK;VLDGLHNELQTIGFQIETIGK;VLIGGDETPEGQR;VTVVDVNESR;YLMDEGAHLHIYDPK;YWQQVIDMNDYQR
3.42632	3.28515	3.23241	3.35599	3.4018	3.27535	-0.0297543	0.16293	39	39	108.17	O60716	CTNND1	Catenin delta-1		AASGALR;ALEEERR;ALSAIADLLTNEHER;EIPQAER;EQEAQFEK;ETQGIEK;FHPEPYGLEDDQR;FVGDADLER;GGPPPPNWR;GIPVLVGLLDHPK;GIPVLVGLLDHPKK;GKKPIEDPANDTVDFPK;GSLASLDSLR;GSLASLDSLRK;GYELLFQPEVVR;HAIPNLVK;HVSAQLER;HYEDGYPGGSDNYGSLSR;IYISLLK;KGGPPPPNWR;KPIEDPANDTVDFPK;KSDFQVNLNNASR;MDDSEVESTASILASVK;MEIVDHALHALTDEVIIPHSGWER;NLAVDAR;NLSYQVHR;QDVYGPQPQVR;QPELPEVIAMLGFR;RTETTVK;SDFQVNLNNASR;SGDLGDMEPLK;SLDNNYSTPNER;SMGYDD…
-1.66999	-1.64666	-1.7597	-1.62273	-1.5224	-1.8142	-0.0390056	0.158499	5	5	89.902	O60733	PLA2G6	85/88 kDa calcium-independent phospholipase A2		AILTLLR;EFGEHTK;GEHGNTPLHLAMSK;GSRPYESGPLEEFLK;LIQLLLSP
0.384329	0.271536	0.157202	0.154352	0.437205	0.364546	-0.0476789	0.167816	4	1	12.823	O60739	EIF1B	Eukaryotic translation initiation factor 1b		GDDLLPAGTEDYIHIR;STIQNLQSFDPFADATK;TLTTVQGIADDYDK;TLTTVQGIADDYDKK
-0.282173	-0.303658	-0.208628	-0.245001	-0.324805	-0.221989	-0.000887871	0.00687302	8	6	98.795	O60741;Q9UL51	HCN1	Potassium/sodium hyperpolarization-activated cyclic nucleotide-gated channel 1		ASATGAGPAAAEK;DLNTGVFNNQENEILK;FEVFQPGDYIIR;GMDSEVYK;IHDYYEHR;MYFIQHGVAGVITK;TGTVNEDSSEIILDPK;VDGGGGGGGGGGGGEEPAGGFEDAEGPR
2.80635	2.75382	2.81324	2.84405	2.94731	2.91673	-0.11156	1.44355	24	22	58.47	O60749	SNX2	Sorting nexin-2		AADAVNK;ALSQLAEVEEK;AVNTQALSGAGILR;DFEQISK;EDSSSTEFVEK;ELSANTAAFAK;EPILSSEPSPAVTPVTPTTLIAPR;FSDFLGLHSK;HPTLLQDPDLR;KELSANTAAFAK;MMVANKPDK;MNESDAWFEEK;QFLESSELPR;QQQFENLDQQLR;SAAMLGNSEDHTALSR;SIVGMTK;SMSAPVIFDR;VGDGMNAYMAYR;VGKEDSSSTEFVEK;VQQGERDFEQISK;WEDAQITLLK;YLESLVQTQQQLIK;YLHVGYIVPPAPEK;YWEAFLPEAK
1.81453	1.70278	1.622	1.73359	1.75822	1.74537	-0.032623	0.226822	11	11	29.634	O60762	DPM1	Dolichol-phosphate mannosyltransferase subunit 1		ASLEVSR;DVAEQLEK;EGNFDIVSGTR;FIPEFIR;GANFLTQILLRPGASDLTGSFR;GLLTLFATT;LGGNEIVSFLK;LGLGTAYIHGMK;QKEGNFDIVSGTR;QLNYTIGEVPISFVDR;YSVLLPTYNER
3.47056	3.36269	3.38997	3.40208	3.54892	3.47395	-0.0672394	0.559063	36	36	107.89	O60763	USO1	General vesicular transport factor p115		ASQKPQPNFPSPEYMIFDHEFTK;DKLELEITDSK;DLGHPVEEEDELESGDQEDEDDESEDPGKDLDHI;DQYNLLK;DSEQVAELK;DSEQVAELKQELATLK;EGSYIQR;ELEGVITK;EQDDLLVLLADQDQK;EQDLQLEELR;EQLDSSNSTIAILQTEK;EVIRNDGVLLLQALTR;GVMGGQSAGPQHTEAETIQK;IGKENFIEK;IVAFENAFER;KEQDDLLVLLADQDQK;LMDLLADSR;LREEIEELK;LREEIEELKR;LSALLQETK;MKPWFEVGDENSGWSAQK;NDGVLLLQALTR;NNNSNQNFFK;NQELLQSQLTEK;QELATLK;QLGPQVQQIILVSPMGVSR;QQVSTLK;QSEDLGSQFTEIFIK;SQLNSQ…
-3.43827	-3.43533	-3.28529	-3.58162	-3.1901	-3.62091	0.077912	0.205494	2	2	15.139	O60783	MRPS14	Small ribosomal subunit protein uS14m		HLADHGQLSGIQR;ILQDVADEEIAALPR
1.32417	1.32705	1.23197	1.29081	1.53551	1.22947	-0.0575355	0.228625	16	16	53.818	O60784	TOM1	Target of Myb1 membrane trafficking protein		AADRLPNLSSPSAEGPPGPPSGPAPR;AGLQSLEASGR;EVKYEAPQATDGLAGALDAR;GLEFPMTDLDMLSPIHTPQR;GSSLADQR;GVTSEEFDK;GVTSEEFDKFLEER;KGLEFPMTDLDMLSPIHTPQR;LEDEFDMFALTR;LPNLSSPSAEGPPGPPSGPAPR;MDFLLGNPFSSPVGQR;NNPPTIVHDK;SELEMVSGNVR;SSPDLTGVVTIYEDLR;SSPDLTGVVTIYEDLRR;YEAPQATDGLAGALDAR
-1.3391	-1.25446	-1.23225	-1.31339	-1.05497	-1.38332	-0.0247113	0.0832583	11	10	58.476	O60825;Q16875	PFKFB2	6-phosphofructo-2-kinase/fructose-2,6-bisphosphatase 2;6-phosphofructo-2-kinase;Fructose-2,6-bisphosphatase		DMILNFAEQNSFK;FLEEQEITDLK;GADELPYLR;HGESEFNLLGK;KFLEEQEITDLK;LEPVIMELER;LNVEAVNTHR;RYPEEFALR;VSSPDYPER;YLNWIGVPTK;YPGGESYQDLVQR
1.02964	1.04126	0.989813	1.06351	1.15255	1.12129	-0.092213	1.41372	22	22	70.755	O60826	CCDC22	Coiled-coil domain-containing protein 22		AVELLPDGTANLAK;DLEEQIETELGK;DLEEQIETELGKK;DLGELLQAWGAGAK;DLLLFLAER;DQLALPWVPPHLR;EFQASPLLLPVPTQVPQPVGR;EINSLSGK;FTFHLEPQAQATQVSDVPATSR;ILEIVGNIR;ILIHSLR;LAEIQELHQSVR;LPTDASEDADQPAGDSAILLR;LQLVVENSAQR;LVVPELSSR;QLMSELETLPR;QSWGLLGAPIQAR;RPEQVTWAAQEQELESLR;SIEEVEADMK;TFAVTDELVFK;VIHLAGQWEK;VINPAVGSGLSPLLPLAMSAR
1.2988	1.27832	1.3139	1.34422	1.424	1.44364	-0.106945	1.5366	10	10	30.472	O60828	PQBP1	Polyglutamine-binding protein 1		ANAEASR;EELAPYPK;GTWSTGLPK;HLEPEPEEEIIAEDYDDDPVDYEATR;KDEELDPMDPSSYSDAPR;LEGLPPSWYK;PLPVALQTR;REELAPYPK;SSNADAEEKLDR;TGADTTAAGPLFQQRPYPSPGAVLR
-2.04967	-1.81839	-1.98142	-1.99047	-1.63283	-2.16409	-0.0206963	0.0412498	1	1	18.273	O60830	TIMM17B	Mitochondrial import inner membrane translocase subunit Tim17-B		GKEDPWNSITSGALTGAVLAAR
1.25411	1.23502	1.25035	1.33789	1.35912	1.33025	-0.095926	3.11076	6	6	19.258	O60831	PRAF2	PRA1 family protein 2		ALDDFVLGSAR;IENKIESIGLK;IESIGLK;IESIGLKR;RTPMGLLLEALGQEQEAGS;TPMGLLLEALGQEQEAGS
1.69563	1.60961	1.54851	1.63171	1.81567	1.63258	-0.0754016	0.432698	23	23	57.673	O60832	DKC1	H/ACA ribonucleoprotein complex subunit DKC1		ADAEVIILPK;AGLESGAEPGDGDSDTTK;ALETLTGALFQRPPLIAAVK;APQVVAEAAK;EIGDYIR;EVELVSE;EVVAEVVK;EYVGIVR;HGKPTDSTPATWK;IMLPGVLR;KEVVAEVVK;KSLPEEDVAEIQHAEEFLIKPESK;KWGLGPK;LDTSQWPLLLK;LHNAIEGGTQLSR;MIEYDPERR;QEYVDYSESAKK;RVVYPLEK;SLPEEDVAEIQHAEEFLIKPESK;SQQSAGK;TGHSGTLDPK;VVYPLEK;YEDGIEVNQEIVVITTK
2.64241	2.59145	2.60303	2.62913	2.718	2.62454	-0.0449254	0.588176	42	42	138.83	O60841	EIF5B	Eukaryotic translation initiation factor 5B		ADRETVAVKPTENNEEEFTSK;AETPTAAEDDNEGDKK;AMQEALAK;AQVMEVK;DAQEMADSLGVR;DDIDLDALAAEIEGAGAAK;DELIHELK;DPIVMGVTVEAGQVK;EEERLEQEK;EGDTIIVPGVEGPIVTQIR;EKEELETGKK;ELEELSLEAQGIK;ETVAVKPTENNEEEFTSK;EVEAAQGVK;GLLLPPPMK;HFEATDILVSK;HKEVEAAQGVK;HTHVQDGEAGGITQQIGATNVPLEAINEQTK;IEPIPGESPK;ILGKDLEK;ILPQYIFNSR;IPGMLIIDTPGHESFSNLR;IPQQLESK;KFEEETVK;KIPQQLESK;KSPDSDVAATLK;LEELEAK;LKEGDTIIVPGVEGPIVTQIR;LLQAQGVEVPSK;…
-2.06422	-2.03509	-2.02705	-2.0262	-1.79807	-2.06694	-0.0783866	0.391802	3	3	46.987	O60858	TRIM13	E3 ubiquitin-protein ligase TRIM13		DAFESLFQSFETWR;DVSEPIVFLQQMQEFR;LQHTLDQK
2.35351	2.23145	2.23032	2.29685	2.46283	2.32567	-0.090024	0.617262	15	15	16.368	O60869	EDF1	Endothelial differentiation-related factor 1		AESDWDTVTVLR;AIPNNQVLGK;DIGKPIEK;GEDVETSK;GKDIGKPIEK;GPTAAQAK;INEKPQVIADYESGR;KGPTAAQAK;KKGPTAAQAK;KWAAGQNK;LDRETEELHHDR;QAILAAQR;RGEDVETSK;VTLEVGK;WAAGQNK
-2.53304	-2.41236	-2.49794	-2.50736	-2.50629	-2.54793	0.0394147	0.440851	5	5	45.373	O60870	KIN	DNA/RNA-binding protein KIN17		EQEVPTFTELSR;GNEGTLESINEK;LDQTHLETVIPAPGK;RVEGIQYEDISK;SALDEIMEIEEEK
-2.56323	-2.24249	-2.4481	-2.61128	-1.74515	-2.52474	-0.124222	0.160272	10	10	125.57	O60879	DIAPH2	Protein diaphanous homolog 2		EGDETGVMDNLLEALQSGAAFR;EVLDLFEK;FPEELEHVESASK;IKELEAEIQQLR;SGISDEK;SNLASMEQQIVHLER;TLADDVRDR;TVSIEEFFGDLNNFR;VFDENKEDDLTELSHR;VSAQILK
2.23429	2.2908	2.22869	2.23349	2.37731	2.20842	-0.021814	0.143981	16	16	45.745	O60884	DNAJA2	DnaJ homolog subfamily A member 2		ANVADTK;EHEVFQR;EISFAYEVLSNPEK;EISFAYEVLSNPEKR;EYHPDKNPNAGDK;EYHPDKNPNAGDKFK;FDVQFPENNWINPDK;GEDMMHPLK;GEGMPQYR;ILEVHVDK;ITFTGEADQAPGVEPGDIVLLLQEK;LYDILGVPPGASENELK;LYDILGVPPGASENELKK;RGEDMMHPLK;VSLEDLYNGK;YGEQGLR
0.730694	0.672729	0.81801	0.750389	0.810079	0.749952	-0.0296621	0.251889	19	14	152.22	O60885	BRD4	Bromodomain-containing protein 4		AASVVQPQPLVVVK;AQAEHAEK;AVHEQLAALSQPQQNKPK;DAQEFGADVR;DVPDSQQHPAPEK;HQFAWPFQQPVDAVK;INELPTEETEIMIVQAK;KLQDVFEMR;LAELQEQLK;LNLPDYYK;NSNPDEIEIDFETLKPSTLR;QLSLDINKLPGEK;RAHEEAR;RQEQQQQQR;SREDEDALEQAR;VDVIAGSSK;VQPPTPLLPSVK;VVHIIQSR;YNPPDHEVVAMAR
-2.36175	-2.13916	-2.10101	-2.31012	-1.77953	-2.40245	-0.0366081	0.0603104	3	3	19.116	O60888	CUTA	Protein CutA		GKIEEDSEVLMMIK;SVHPYEVAEVIALPVEQGNFPYLQWVR;TQSSLVPALTDFVR
-4.85795	-4.86175	-5.03264	-4.94407	-4.64328	-4.90493	-0.0866925	0.32151	2	2	47.645	O60906	SMPD2	Sphingomyelin phosphodiesterase 2		AQAELQHVLGR;EAQDLGPEPQPALLLGQQEGDR
-4.90195	-4.79152	-4.72929	-4.89883	-4.09084	-4.68892	-0.248057	0.428848	3	3	31.691	O60921	HUS1	Checkpoint protein HUS1		DLQEPVVPDPDVSIYLPVLK;IVTHDIPIK;LLQFLAGQQVNPTK
1.16573	1.15548	0.994371	1.0941	1.24662	1.31288	-0.112673	0.590085	8	8	14.21	O60925	PFDN1	Prefoldin subunit 1		AAPVDLELK;AAPVDLELKK;AFTELQAK;EAEDNIR;EAIHSQLLEK;LADIQIEQLNR;MFILQSK;VIDTQQK
-1.06611	-0.993435	-1.0011	-1.20857	-0.877818	-1.11056	0.0454346	0.170437	2	2	13.952	O60927	PPP1R11	E3 ubiquitin-protein ligase PPP1R11		AEAGAGLSETVTETTVTVTTEPENR;KVEWTSDTVDNEHMGR
-2.13206	-2.20294	-2.10255	-2.16828	-1.98301	-2.06493	-0.0737829	0.529819	6	6	84.958	O60934	NBN	Nibrin		DTKPELEIDVK;EESLADDLFR;IPNYQLSPTK;KLLLTEFR;KQPPQIESFYPPLDEPSIGSK;YGTFVNEEK
-0.566229	-0.396042	-0.365158	-0.62365	-0.197227	-0.48633	-0.00674089	0.0159238	5	5	22.629	O60936	NOL3	Nucleolar protein 3		ASDPDEAGGPEGSEAVQSGTPEEPEPELEAEASK;GVLTGPEYEALDALPDAER;GVLTGPEYEALDALPDAERR;LLLLVQGK;TAGAPDPAWDWQHVGPGYR
-2.1905	-2.24838	-2.14893	-2.18606	-2.05548	-2.2236	-0.0408882	0.281167	9	2	71.355	O60941	DTNB	Dystrobrevin beta		AQNFDVIR;AQQNPTLLAELR;EILQEIQR;KDELEQR;LAAEAGNVTRPPTDLSFNFDANK;LEHEQASQPTPEK;LRLEHEQASQPTPEK;NDLLVAADSITNTMSSLVK;QLIAELENK
-1.10623	-1.17402	-1.16413	-1.02229	-0.973983	-1.17711	-0.0903317	0.627385	6	6	68.556	O60942	RNGTT	mRNA-capping enzyme;mRNA 5-triphosphate monophosphatase;mRNA guanylyltransferase		EVSHEMDGLIFQPTGK;GVTQVTTQPK;LGAIFLEGVTVK;LLDLKPYK;WKPPSLNSVDFR;YLIYDIIK
0.928305	0.941898	0.938766	0.943836	1.13683	0.93029	-0.0673285	0.430968	18	18	82.64	O75027	ABCB7	Iron-sulfur clusters transporter ABCB7, mitochondrial		ADNDAGNAAIDSLLNYETVK;AGAAFFNEVR;AMLSYVWPK;GSIYLAGQNIQDVSLESLR;GSIYLAGQNIQDVSLESLRR;KVAIVGGSGSGK;LAGLHDAILR;LQEEIVNSVK;LSTVVDADEIIVLDQGK;MPHGYDTQVGER;TSIFIAHR;TYETASLK;VAISLGFLGGAK;VAIVGGSGSGK;VAQNSIR;VDTQIKDK;VLSGISFEVPAGK;VQNHDNPK
-0.95524	-0.943159	-1.0032	-1.02916	-0.842341	-1.05364	0.00785033	0.0385091	15	13	182.66	O75037	KIF21B	Kinesin-like protein KIF21B		AGDGNEAIGALIQNYIR;AIAHLFGGIAER;AMQEAIDAINNR;AQEQGVAGPEFK;FHFVDLAGSER;GIISPVGGAK;GLQVAQK;IRDTQLER;KVVHVPYR;LIDELENSQR;LILLQNK;LLLDNFLK;VIGEDGAEGYSDLFR;VTQLMSQEANLLLAK;VVVNQDK
-1.4034	-1.25324	-1.02608	-1.2739	-1.31237	-1.60187	0.168474	0.486104	10	9	154.67	O75038	PLCH2	1-phosphatidylinositol 4,5-bisphosphate phosphodiesterase eta-2		AHQILQQKPAQYLR;DVIETINK;ESLDLVSTSSEVAR;FLVWDHDPIGR;FYYLDEHR;GFPELVLGTR;GLLGIDGFTNYTR;IISGQQLPKPR;ISIDSIQEVSEGR;RVENTAK
-0.380859	-0.450703	-0.442194	-0.460024	-0.24508	-0.466246	-0.0341355	0.169773	12	9	120.87	O75044;P0DMP2;P0DJJ0	SRGAP2	SLIT-ROBO Rho GTPase-activating protein 2		ANQQETEQFYFTK;DKEIIAEYDTQVK;EAEKQEEK;ELEGPVYSR;FVQVSEDSGR;GLEHPLFPK;HGLQHEGIFR;HTPDVVLDTLEPLK;IENEEVKK;KVLLVLPK;SPDSTANVR;VSGSQVEVNDIK
-1.53397	-1.53915	-1.58379	-1.61623	-1.39086	-1.71875	0.0229762	0.0828279	6	6	56.149	O75052	NOS1AP	Carboxyl-terminal PDZ ligand of neuronal nitric oxide synthase protein		ASTATAEETDIDAVEVPLPGNDVLEFSR;DQLAAEAAAR;GVTDLDAVGK;QVQELELK;YNLVDDGHDLR;YVGSLDVPRPNSR
-0.614609	-0.591208	-0.469074	-0.594173	-0.263711	-0.62542	-0.0638622	0.197758	7	7	135.19	O75054	IGSF3	Immunoglobulin superfamily member 3		DATFHYGEQAAK;ESDSVFVLK;FQPVGTVEFHDLVTFTR;LHTVGEPVEFR;LTEEESAPIGIR;NIPIIVLPLK;VGEKPVEVISLSR
0.542164	0.638659	0.55987	0.508194	0.653079	0.430805	0.049538	0.278226	11	11	99.995	O75061	DNAJC6	Auxilin		AADFEDLLSGQGFNAHK;ALLSTMHTVLWAGETK;ATGQPYEQYAK;AVLVVHPDK;GDLDFTYVTSR;GSSNLEGK;HLDHYTVYNLSPK;ILEWIEGK;KAVLVVHPDK;SITVSPIPFFNK;VIQSVTSYTK
-0.84111	-0.805008	-0.917402	-0.952085	-0.706405	-0.892735	-0.00409857	0.0167744	7	7	46.432	O75063	FAM20B	Glycosaminoglycan xylosylkinase		ALLILEGGQK;DHVVEGEPYAGYDR;EVYPEETPELGAVMHAMATK;HNAEVAAFHLDR;LLSVLATVK;SAMAHDPISPVLSDPHLDAVDQR;SFGNPSLDER
-4.8461	-4.52486	-4.46483	-4.70267	-4.28229	-4.83386	-0.00565592	0.00911672	3	3	163.84	O75064	DENND4B	DENN domain-containing protein 4B		AELFESLQEQPGALPVPGPSR;ANTLVYEAELLGR;DVDNLFFLQGFLK
-0.0934925	-0.0887489	-0.0639915	-0.0379887	0.0607634	-0.0221996	-0.0822694	1.20953	13	11	77.448	O75069	TMCC2	Transmembrane and coiled-coil domains protein 2		AAIDHLHQK;AGISGFGGGVVEGVK;ALSGSATLVSSPK;DDNVAEYLK;GDLVALSLPAGHGDTDGPISLDVPDGAPDPQR;GSLSGLSQATHTAVVSKPR;HWDSLTYLLEHVLLPS;LANNADK;LELQQQQQQVVQLEGVENANAR;QELASMEEK;SAQTIAQLHK;SNALYGAPGNLDALLEELR;VAYQSYER
4.15478	4.05879	4.13208	4.16035	4.21957	4.13508	-0.0564477	0.668764	30	30	66.193	O75083	WDR1	WD repeat-containing protein 1		AHDGGIYAISWSPDSTHLLSASGDK;DIAWTEDSK;DIAWTEDSKR;DYSGQGVVK;FATASADGQIYIYDGK;FGAVFLWDSGSSVGEITGHNK;FSPDGNR;FTIGDHSR;GHTNQVSR;GNNFLYTNGK;GPVTDVAYSHDGAFLAVCDASK;IAVVGEGR;IIGGDPK;IKDIAWTEDSK;IKDIAWTEDSKR;IWDTTQK;IWDTTQKEHLLK;KVFASLPQVER;LATGSDDNCAAFFEGPPFK;LYSILGTTLK;LYSILGTTLKDEGK;NIDNPALADIYTEHAHQVVVAK;NNPSKPLHVIK;SYIYSGSHDGHINYWDSETGENDSFAGK;VFASLPQVER;VINSVDIK;VVTVFSVADGYSENNVFYGHHAK;YAPSGFYIASGDVS…
-1.78114	-1.96039	-1.85959	-1.76064	-1.4565	-1.46011	-0.30796	1.2744	6	5	167.71	O75094	SLIT3	Slit homolog 3 protein		AIPAGAFTQYK;DSYVELASAK;GAFQDLK;GDNDPLALELYQGHVR;LQVLPELLFQSTPK;WLADYLQDNPIETSGAR
-1.18301	-1.06767	-0.892944	-0.639111	-2.60147	-1.1333	0.410083	0.276731	1	1	161.18	O75095	MEGF6	Multiple epidermal growth factor-like domains protein 6		GYELDTDQR
0.887758	0.93124	0.969196	0.963673	1.11208	0.906275	-0.0646118	0.419172	19	19	212.04	O75096	LRP4	Low-density lipoprotein receptor-related protein 4		AGMDASGR;AIAVFPR;ALGPEPVLLFANR;ANLDGSER;ANLDGSHR;AQPLGFNK;EGGPDHNYTK;ETLQENLENLMDIHVFHR;GTGSNVILVR;IEVANLDGAHR;ISFDTEDLSDDVIPLADVR;IYWTDWQTK;KEGGPDHNYTK;LHFPMDIHTLHPQR;SIQSADR;TVLIWENLDRPR;VLIGSQLPHPFGLTLYGER;VLLWQNLEKPR;VLVWQNLDSPR
0.313547	0.125422	0.188368	0.564795	0.649535	0.509537	-0.36551	2.22245	7	5	83.672	O75106	AOC2	Amine oxidase [copper-containing] 2		AAALAHLDR;AQPWPHPGQSQLFADLSR;EDLTAFSLGSPLPR;EELTAVMR;GGEEGLLFGNR;LDLDVAGLK;YLDSSFGLGR
-0.10145	-0.0987282	-0.135618	-0.133463	-0.01019	-0.132984	-0.0197198	0.175114	14	14	118.58	O75110;O43861	ATP9A	Probable phospholipid-transporting ATPase IIA		DKEVNSQVYSR;GEAHLELNAFR;GPTLTTK;ISYLLTDK;LLMVHGR;LPTAADLLQIR;NAHLVTR;NQDIHVFR;SLAEEQYQDFEAR;SSNIQVGDLIIVEK;SSTIPEQLGR;SYVYAEEPNIDIHNFVGTFTR;TVWLGHPEK;VYQASSPDEVALVQWTESVGLTLVGR
-2.74685	-3.04695	-2.40305	-3.00556	-2.74102	-3.16469	0.238142	0.460503	6	6	100.38	O75113	N4BP1	NEDD4-binding protein 1		AGTPVSELTK;AVLDEFTAPAEK;FLLHLADK;GVYSSTNELTTDSTPK;LEEFLQK;VYGPSTEPLLLLEEIEK
3.01565	2.99101	2.95975	2.96438	3.01942	2.96124	0.00712299	0.103029	43	40	160.9	O75116	ROCK2	Rho-associated protein kinase 2		ADSEQLAR;AEDYDVVK;CLTQNDLK;DATIASLEETNR;DSDIEQLR;DVKPDNMLLDK;DVQEQLSR;EFINLQSALESER;ELEEEITLR;ELEEEITLRK;ELNEMQAQIAEESQIR;ELQDQLEAEQYFSTLYK;EQEFPVEPVGEK;GAFGEVQLVR;GNDTDVR;HKQELTEK;IFQILYANEGESK;ILFYDSEQDKEQSNPYMVLDIDK;IQQNQSIR;IYESIEEAK;KEQEFPVEPVGEK;KNEESQEIQK;KNEESQEIQKK;KPPAPDPFAR;KYVIVSSK;LEGWLSLPVR;LFHVRPVTQTDVYR;LKDEEISAAAIK;LKDVQEQLSR;MPGAPETAPGDGAGASR;NLENDVNSLKDQLEDLK;QELQDER;QIQQLESNNR…
3.18529	3.13817	3.12528	3.15464	3.26788	3.15149	-0.0417528	0.419585	47	42	141.06	O75122	CLASP2	CLIP-associating protein 2		AFTDVPSIQIYSSR;AGGDATDSSQTALDNK;AHHAAGQSVR;ASLLHSMPTHSSPR;ASSLPGSLQR;DYNPYNYSDSISPFNK;EGGAGAVDEDDFIK;EGLLGLQNLLK;EILSDDKHDWDQR;ELEETLNK;ELSNHNER;ESFPNDLQFNILMR;ETLNLLLPEIMPGLIQGYDNSESSVR;FDHGAEAIVPTLFNLVPNSAK;FTVDQTQTPSLK;GIHDADAEAR;GVTEAIQNFSFR;HAAVLVETIK;HAAVLVETIKK;IALYELMK;KEGLLGLQNLLK;KGIHDADAEAR;KIALYELMK;KPGSAGGPK;LGAGALNAGSYASLEDTSDKLDGTASEDGR;LLDGALK;LLHNHLR;LSAPLAGMGNAK;LTQEESFSVWDEHFK;…
-4.19707	-4.23019	-4.22562	-4.24838	-4.29867	-4.48052	0.124896	0.810908	2	2	78.855	O75127	PTCD1	Pentatricopeptide repeat-containing protein 1, mitochondrial		ALLPVLAK;LVEALDLFER
-2.78779	-2.54989	-2.71991	-2.71674	-2.3435	-2.72743	-0.0899715	0.245807	4	4	135.62	O75128	COBL	Protein cordon-bleu		APVLAAPPVTVK;GPPSTPVPTQTQNPESR;IISLSSSVPEAESQPIGK;SLTLGPSLSLGSISGVSVK
2.60261	2.55124	2.68845	2.6745	2.81219	2.75284	-0.132414	1.10208	16	15	60.13	O75131	CPNE3	Copine-3		DIVQFVPFR;FGVYDIDNK;GSITISAEEIK;GSITISAEEIKDNR;KLDNKDLFGK;LLPPKNPATK;LYGPTNFSPIINHVAR;NNLNPVWRPFK;NSGVISVK;QAIVNASR;QFQNAPK;QTSDGNWLMVHR;SDPYLEFHK;SPLGEVAIR;SSPVEFECINEK;VVLFEMEAR
-5.19617	-5.21271	-5.24994	-5.20043	-5.10821	-5.12736	-0.0742737	1.0816	7	7	181.26	O75140	DEPDC5	GATOR1 complex protein DEPDC5		ADEDEWQLLDGFVR;ALINPFAPSR;DPTHSSAELLELAYHEAAGR;DVTLDLVELTFK;ESENALPIQVDYDAYDAQVFR;SVDEFPEINR;TVTLDVDVNNR
-1.92396	-1.81849	-1.81705	-1.92559	-1.73765	-1.7391	-0.0523895	0.296073	7	7	56.571	O75143	ATG13	Autophagy-related protein 13		ALAGQLPAVGR;ASPHDVLETIFVR;DIPEVTHEAK;EFDAFVETLQ;EGGVPLAPNQPVHGTQADQER;IYFGEVQLSGLGEGFQTVR;KQGHEYVILYR
-0.239042	-0.193319	-0.23851	-0.297792	0.00693226	-0.311155	-0.0229521	0.076949	19	14	133.49	O75145	PPFIA3	Liprin-alpha-3		AETLPEIEAQLAQR;DSSSLAGTPSDETLATDPLGLAK;EAQDGLATAQLR;EIGISNPLHR;EQLLEREEEIAELK;GEGPAIPGDTPPPTPR;GRPPSSYSR;KLQDELLLNK;LLLEHLECLVSR;LLSESNER;LQDELLLNK;LSETVDK;MTQALALQAGSLEDGGPPR;QAQSPGGVSSEVEVLK;QLAEWLDDAK;QLEAQLEEK;QLSIALPQEFAALTK;RLDEDSAK;SLFEHHK
1.73192	1.73402	1.76587	1.74653	1.89921	1.69186	-0.0352596	0.217797	28	27	119.39	O75146	HIP1R	Huntingtin-interacting protein 1-related protein		AAQLEGER;AINTQEAPVK;AINTQEAPVKEK;ALELMGQLQDQQALR;ALVDNEQLR;AQEALSHTEQSK;DALSGAVR;DDRDLQIESLKR;DGIYPAQLVNY;EADLLAAQSLVR;EIGDLWGHLHDR;ESELKLEEK;GAAAEAAGILQDAVSK;GAATQQEFYAK;HELAQLR;HPQFPAGLEVTDEVLEK;LDDPLHLR;LDTLSAEK;LLDEQFAVLR;LLVTTSTSLQK;QDHQLDKK;QLTVTQQSQEEVAR;RIEDMMNQAR;SQVNALEGELEEQR;SQVNALEGELEEQRK;TPLQGILQLGQELKPK;WTEGLISASK;YGQLVNVYTK
-4.30422	-4.22609	-4.09723	-4.25888	-3.98241	-4.2511	-0.0450509	0.154389	5	5	206.94	O75147	OBSL1	Obscurin-like protein 1		AEDGPGASLALR;DGEEVVESPALLLQK;KYEQIEEGTVR;LILHAVK;VVSGAEAELK
1.83491	1.83335	1.83549	1.79222	1.98134	1.78483	-0.0182136	0.101792	30	26	113.68	O75150	RNF40	E3 ubiquitin-protein ligase BRE1B		ALQGSLGGVEK;AQEDISR;AVEAAQLAEDLK;EGPSLGPPPVASALSR;EKDDANFK;EKESFNLK;EMAPVPGTTTTTTSVK;EVQAEIGK;GDSEPLSEAAQAHTR;GLLLATK;IADEDALRR;IEFEQNLAANEQAGPINR;ISLEYSELQDK;KAQESQK;KAVEAAQLAEDLK;KEELVPSEEDFQGITPGAQGPSSR;KIADEDALRR;LLLDMYK;LLREEKDELGEQVLGLK;LQAELQGAVR;LQDLATQLQEK;QAEEQIEHLQR;SLPEEVVR;SQVDAQLLTVQK;TEVIQLEDTLAQVR;TTTTLIEPIR;VQLEHVQTR;VTSAETK;VVEASDR;YWAQLDETVEALLR
0.68079	0.661152	0.647188	0.668993	0.771861	0.68614	-0.0459547	0.620809	14	13	120.77	O75151	PHF2	Lysine-specific demethylase PHF2		AVLPTPVTKPK;DSDYVYPSLESDEDNPIFK;ESASPTIPNLDLLEAHTK;GSSLAAHGAR;HLLEAFK;KDGLGLAVPAPTFYVSDVENYVGPER;LKEFVDYYYSTNR;LSENASK;LSQQEEQK;MSSFVEPPDIVK;SVDVTDVTK;VASIETGLAAAAAK;VLNVTNLEFSDTR;VPGSQLTLGYMEEHGFTEPILVPK
1.36666	1.39493	1.35895	1.36526	1.48575	1.36141	-0.0306253	0.293484	21	21	89.13	O75152;P0DQW0;A0A1B0GTU1	ZC3H11A	Zinc finger CCCH domain-containing protein 11A		AAVAVVPLVSEDK;ASQLSVQQNK;EASGETTGVDITK;GQSEEPAGK;KVEAPETNIDK;LIWEISGGK;LKTEGPSK;LSVQSNPSPQLR;RGELQTK;SMQEVHIK;SVTVPEAENPR;TFSEVLAEK;TLEEIKLEK;TLEEILLER;TVLPTVPESPEEEVK;TVVLPPIVASR;VEVETSGIGDSLLNVK;VGEIHVK;VNVKPSVVK;VQQSSESSTSSPSQHEATPGAR;YVDGLFLPPSK
-1.24422	-1.16481	-1.21675	-1.26693	-0.926696	-1.26763	-0.0548423	0.179981	14	14	146.67	O75153	CLUH	Clustered mitochondria protein homolog		ASDAFHFFQSGQAK;AVGSISSTAFDIR;FNPDIFSPGVR;HKPAFTEEDVLNIFPVVK;HQLDHVFK;HYILDLLR;LGYEEHIPGQTR;QELVDAFVEHR;SALQHEK;SVEGLQEGSVLR;TVVSHPR;VALSHHLVAR;VTAQSIIPGILER;VVEEPYTVR
-0.508015	-0.499481	-0.607313	-0.518044	-0.343843	-0.599552	-0.0511236	0.243245	22	13	135.25	O75155;Q96NL1	CAND2	Cullin-associated NEDD8-dissociated protein 2		ATDLDQEVK;AVAALLTIPEVGK;AVLLEALGSPSEDVR;DIAGIGLK;EREENVK;EVEMGPFK;FKEREENVK;GQVPLVVK;HTVDDGLDVR;LGAHLDR;LGDDLEPTLLLLLDR;LISLLTAPVYEQAVDGGPGLHK;LLEDKNGEVQNLAVK;LVLVNPSFLLPR;MTSSDKDFR;NGEVQNLAVK;QEFEKQDELK;QEFEKQDELKR;QVFHSLAR;SFIGEFMESLQDPDLNVR;VPTSPTAIR
-3.22995	-3.18671	-3.41286	-3.45211	-2.96708	-3.28504	-0.0417601	0.0942591	5	3	79.227	O75157;Q99576	TSC22D2	TSC22 domain family protein 2		DSDSSVLTR;EEVEVLK;HSSTFDQTAER;IEQAMDLVK;LDHGSGEPYR
-1.60753	-1.62534	-1.5621	-1.62912	-1.4641	-1.70173	-9.21885e-06	4.12598e-05	7	7	120.66	O75164	KDM4A	Lysine-specific demethylase 4A		AQGQTGVLTVHSYAK;DNTVIDHTLPTPEAAEFLK;FNEIFTEK;HVDEWNIGR;QVEDGLTFPDYSDSTEVK;TILDLVEK;YSEFEELER
2.01907	2.07205	2.09197	1.98051	2.15748	1.99639	0.0162363	0.0958742	40	40	254.41	O75165	DNAJC13	DnaJ homolog subfamily C member 13		ADLVPYLLK;AELLEFLESQQENMIK;AGFLAFTQLPK;AIIEEGDKEIATK;AQTAELFAK;ASLLSSK;ATVPLQSNVIEAAPDMK;DNPEAAVHIFEGTHENPELIWNDNSR;DSLLASLLDGVR;EFLIALLEK;ENGLEVLQEAFSR;ENINQKPVVLR;EPLEFEQYLNLR;EQSELVAQALK;FGQDHAR;FPDWPIKDPVK;GQGTEFNLTFR;HKEDLQPYK;IAAHLADFTPR;IFIAQPAWVLR;ILPPGLLAYLESSDLVPEKDADR;IVDGPDPENIILILK;KFLENLLEK;KLAVASVTEILK;KPVILEVTPGGFDQINPATNR;LAVASVTEILK;LIFSLLR;LILFLNK;LLEGIGLENLDSPAATK;LLLEEDENEESG…
0.729296	0.764629	0.747288	0.688011	0.893985	0.693151	-0.0113115	0.0570043	17	17	104.94	O75170	PPP6R2	Serine/threonine-protein phosphatase 6 regulatory subunit 2		AASAMDAVSR;AILTTIGVLEEPLGNAR;ASLEAHR;DVGSSVWAAGTSAPEEK;FDLNTTSHVDK;FISLVLK;GPVQTHISEVIR;HIGTSALMDLLLR;IANAVVQNLER;ILEAWEANDHTQAAGGMR;IQPFDDDEDEDIWEDSDTR;KTEQVITFLK;LKDFHQLLLNPPK;LVELIHPSQDEDR;QDVLHWLNEEK;RVGTEGLVDSFSQGLER;VGTEGLVDSFSQGLER
0.80896	0.80471	0.836586	0.753391	0.930568	0.790827	-0.00817649	0.0512566	12	12	81.871	O75175	CNOT3	CCR4-NOT transcription complex subunit 3		AAGALLNGPPQFSTAPEIK;AAISSGIEDPVPTLHLTER;APEPLSSLK;AQYLAAK;EGLGLAQK;KLQGEIDR;KVSEGVEQFEDIWQK;LHNAANANQK;MLDNDSILVDAIR;STDSEVSQSPAK;VSEGVEQFEDIWQK;YLEDRDLQ
-1.50135	-1.44036	-1.74193	-1.61773	-1.49358	-1.56764	-0.00156371	0.00518219	1	1	42.99	O75177	SS18L1	Calcium-responsive transactivator		GKGEVTQQTIQK
0.359163	0.344316	0.317045	0.277157	0.436851	0.402742	-0.0320749	0.254267	18	11	274.25	O75179	ANKRD17	Ankyrin repeat domain-containing protein 17		AESTANAGQSDNR;ATVPVAAATAAEGEGSPPAVAAVAGPPAAAEVGGGVGGSSR;DTALTIAADK;EFTGAHIDIDK;EKIEELNK;GADVNAPPVPSSR;GAHIDVR;GASLEEVNDEGYTPLMEAAR;GHLEMVR;KLEEIEAK;KQPSVLVTFPK;KVSVPSTVISR;LEALLEAAGIGK;LLLSGTADGADLR;LSTADGK;NASILLEELDLEK;NVSDYTPLSLAASGGYVNIIK;TVDPETQAR
-1.5815	-1.4294	-1.41983	-1.55052	-1.24257	-1.49316	-0.0481621	0.168164	11	11	133.06	O75182	SIN3B	Paired amphipathic helix protein Sin3b		DLSIAAVGK;FLDHPEIYR;GAAGGNLSSR;GMSEEEVFTEVANLFR;GQEDLLSEFGQFLPEAK;KTPYEEQLHR;LDDSLGGTSEVIQR;LPVHVEDALTYLDQVK;SFLEILHTYQK;SLLEGSIDPTQYEDTLR;SLLNEIESVYDEHQEQHSEGR
0.47398	0.407598	0.441143	0.50235	0.562905	0.51532	-0.0859512	1.49708	7	6	36.087	O75190;Q8WWF6	DNAJB6	DnaJ homolog subfamily B member 6		APGPWDPLASAAGLK;DIYDKYGK;FKQVAEAYEVLSDAK;QVAEAYEVLSDAK;SISTSTK;VDYYEVLGVQR;VEVEEDGQLK
-0.764191	-0.886827	-0.938808	-0.905611	-0.841981	-0.886522	0.0147626	0.0958388	5	5	35.509	O75208	COQ9	Ubiquinone biosynthesis protein COQ9, mitochondrial		LVQLGQAEK;MLIPYIEHWPR;STGEALVQGLMGAAVTLK;VLEEEQK;YTDQGGEEEEDYESEEQLQHR
1.53955	1.41136	1.43494	1.41285	1.55131	1.54086	-0.0397202	0.267136	9	9	21.007	O75223	GGCT	Gamma-glutamylcyclotransferase		AIEPNDYTGK;DVTGPDEESFLYFAYGSNLLTER;ENGLPLEYQEK;KGETQTL;LDFGNSQGK;SNLNSLDEQEGVK;SYLMTNYESAPPSPQYK;VATQEGK;VSEEIEDIIK
1.36686	1.37472	1.31923	1.41255	1.49601	1.28424	-0.0440003	0.276186	5	5	23.563	O75251	NDUFS7	NADH dehydrogenase [ubiquinone] iron-sulfur protein 7, mitochondrial		GEYVVAK;KVYDQMPEPR;LDDLVNWAR;QSDVMIVAGTLTNK;VYDQMPEPR
2.16623	2.14483	2.2111	2.18366	2.31379	2.1062	-0.027166	0.160256	18	18	52.545	O75306	NDUFS2	NADH dehydrogenase [ubiquinone] iron-sulfur protein 2, mitochondrial		APGFAHLAGLDK;GEFGVYLVSDGSSRPYR;GHMLADVVAIIGTQDIVFGEVDR;GSGIQWDLR;GSGIQWDLRK;IKAPGFAHLAGLDK;KTQPYDVYDQVEFDVPVGSR;LDELEELLTNNR;LVMELSGEMVR;LYTEGYQVPPGATYTAIEAPK;MPPGEIK;MPPGEIKVDDAK;NITLNFGPQHPAAHGVLR;TIDIGVVTAEEALNYGFSGVMLR;TQPYDVYDQVEFDVPVGSR;TSMESLIHHFK;TYLQALPYFDR;VLFGEITR
-0.310678	-0.38364	-0.416685	-0.388544	-0.269687	-0.326904	-0.0419563	0.379284	9	9	50.925	O75312	ZPR1	Zinc finger protein ZPR1		AISGLEQDQPAR;FTTLEGLLK;GALTTVEGLITR;IDEFIVK;IPELDFEIPAFSQK;LQEFSQK;LVQIPHFK;NPFTLGDSSNPGQTER;TFDQNEELGLNDMK
-1.67895	-1.70908	-1.80044	-1.69054	-1.68506	-1.76447	-0.0161327	0.133182	2	2	42.857	O75317;P62068	USP12;USP46	Ubiquitin carboxyl-terminal hydrolase 12;Ubiquitin carboxyl-terminal hydrolase 46		IDAQAIEEFYGLTSDISK;VVFPLELR
1.2151	1.09246	1.13764	1.21637	1.3183	1.22506	-0.104843	1.0158	8	6	33.742	O75323	NIPSNAP2	Protein NipSnap homolog 2		DAHSNLLAK;ENKEFLEFR;ETSNLYK;HGWEELVYYTVPLIQEMESR;KDAHSNLLAK;KETSNLYK;SGPNIYELR;YEGGYPALTEVMNK
-1.7061	-1.66076	-1.37075	-1.70269	-1.75296	-1.90293	0.206986	0.789287	5	5	74.823	O75326	SEMA7A	Semaphorin-7A		ATIVHQDQAYDDK;GDQGGESSLSVSK;GHVGQDR;TPLFHSK;VYLFDFPEGK
-0.00615311	-0.0442715	-0.0551586	-0.118011	0.0961523	-0.137766	0.018014	0.0835018	20	11	143.29	O75334	PPFIA2	Liprin-alpha-2		EIGISNPLHR;EQNVHIQR;ETQESLSLAQQR;GADPPEFAALTK;HLEGQLEEK;IAVVEEDGREDK;KAETLPEVEAELAQR;KHELLEEAR;LAEEIEK;LELAEQK;LLLEHLECLVSR;LLTESNER;MAALEEK;MRHLEGQLEEK;QAQSPSGVSSEVEVLK;QLNSALPQDIESLTGGLAGSK;RLDESDDKNFR;SGAIMSALSDTEIQR;SLFEHHK;VGEVEQEAETAR
1.43109	1.41179	1.40893	1.50093	1.59333	1.64578	-0.162744	1.71613	8	8	21.868	O75340	PDCD6	Programmed cell death protein 6		AAYSYRPGPGAGPGPAAGAALPDQSFLWNVFQR;AGVNFSEFTGVWK;DNSGMIDKNELK;LSDQFHDILIR;QALSGFGYR;SIISMFDR;TYDRDNSGMIDKNELK;YITDWQNVFR
3.52144	3.42775	3.40052	3.51391	3.5458	3.4158	-0.0419321	0.320909	14	14	12.855	O75347	TBCA	Tubulin-specific chaperone A		AEDGENYDIK;AEDGENYDIKK;DLEEAEEYK;DLEEAEEYKEAR;EKVMYEK;ILENEKDLEEAEEYK;ILENEKDLEEAEEYKEAR;KQAEILQESR;LEAAYLDLQR;LVLDSVK;LVLDSVKLEA;QAEILQESR;QQEEKIEK;RLEAAYLDLQR
1.5459	1.63545	1.58832	1.62439	1.78694	1.5927	-0.0781196	0.524579	7	5	13.757	O75348	ATP6V1G1	V-type proton ATPase subunit G 1		ASQSQGIQQLLQAEK;ASQSQGIQQLLQAEKR;EAAALGSR;EEAQAEIEQYR;GSCSTEVEKETQEK;MTILQTYFR;QAKEEAQAEIEQYR
1.62958	1.57735	1.54278	1.54692	1.70688	1.56005	-0.0213766	0.138272	17	13	49.301	O75351	VPS4B	Vacuolar protein sorting-associated protein 4B		AIDLASK;AVATEANNSTFFSISSSDLVSK;FPHLFTGK;FTEDFGQEG;GILLFGPPGTGK;IYIPLPEPHAR;KFTEDFGQEG;KTDGYSGADISIIVR;LHLGTTQNSLTEADFR;LQNQLQGAIVIERPNVK;SENESEAAR;SLSNTKPTVNEHDLLK;SSTSPNLQK;VQSATHFK;WLGESEK;WSDVAGLEGAK;YEAQGDK
-0.0630302	0.0905495	-0.0139122	-0.0558453	0.538848	0.0325832	-0.167326	0.366709	4	4	26.638	O75352	MPDU1	Mannose-P-dolichol utilization defect 1 protein		AAEADGPLK;AAEADGPLKR;GLGLGIVAGSLLVK;LLVPILLPEK
-2.88562	-2.89126	-2.92945	-2.92391	-2.91024	-2.99684	0.0415532	0.618211	4	3	47.517	O75356;REV__Q5VUR7;REV__Q5TYW2;REV__Q5SQ80;REV__Q5CZ79;REV__Q4UJ75;REV__Q8N2N9;REV__Q5JPF3	ENTPD5	Nucleoside diphosphate phosphatase ENTPD5		ALLFEVK;AVDTDMIDYEK;LATLGALETEGTDGHTFR;LHQPEEVQR
-0.723162	-0.757463	-0.765282	-0.784275	-0.794803	-0.703251	0.0121406	0.142018	3	3	19.535	O75365	PTP4A3	Protein tyrosine phosphatase type IVA 3		VVEDWLSLVK;YEDAIQFIR;YGATTVVR
4.10305	4.07108	4.02568	4.09149	4.13006	4.00982	-0.0105225	0.0892045	17	15	39.183	O75367	MACROH2A1	Core histone macro-H2A.1		AASADSTTEGTPADGFTVLSTK;AGVIFPVGR;AISSYFVSTMSSSIK;EFVEAVLELR;EFVEAVLELRK;GGKEFVEAVLELR;GKLEAIITPPPAK;GVTIASGGVLPNIHPELLAK;HILLAVANDEELNQLLK;KGGKEFVEAVLELR;KQGEVSK;LEAIITPPPAK;LEAIITPPPAKK;NGPLEVAGAAVSAGHGLPAK;QTAAQLILK;SIAFPSIGSGR;SLFLGQK
2.55903	2.46521	2.63304	2.70904	2.63474	2.7273	-0.137936	1.15401	12	12	12.774	O75368	SH3BGRL	Adapter SH3BGRL		DIAANEENR;EAEVQAK;ENNAVYAFLGLTAPPGSK;ENVPENSRPATGYPLPPQIFNESQYR;GDYDAFFEAR;IGFEEKDIAANEENR;IGFEEKDIAANEENRK;KKQQDVLGFLEANK;KQQDVLGFLEANK;QQDVLGFLEANK;VYIASSSGSTAIK;VYIASSSGSTAIKK
4.16912	4.10217	4.08019	4.09535	4.36839	4.20223	-0.10483	0.554065	96	81	278.16	O75369	FLNB	Filamin-B		AAGSGELGVTMK;ADIEMPFDPSK;AEGPGLSK;AEITFDDHK;AEVSIQNNK;AGGPGLER;AGLAPLEVR;AGPGTLSVTIEGPSK;AHGPGLEGGLVGKPAEFTIDTK;AIVDGNLK;AIVHDNK;APLNVQFNSPLPGDAVK;ASSDASK;ATQTGDASK;AWGPGLHGGIVGR;AYGPGLEK;DAGEGLLAVQITDQEGKPK;DAGYGGISLAVEGPSK;DFLDGVYAFEYYPSTPGR;DGTYAVTYIPDK;DLAEDAPWK;DLAEDAPWKK;DLDIIDNYDYSHTVK;EAFTNKPNVFTVVTR;EAGAGGLSIAVEGPSK;EATTDFTVDSRPLTQVGGDHIK;ETTDFKVDTK;EVGEHLVSIK;EVGEHLVSIKK;FADEHVPGSPFTVK;…
2.21249	2.25859	2.19986	2.18452	2.22954	2.14751	0.0364612	0.542677	22	19	270.21	O75376	NCOR1	Nuclear receptor corepressor 1		ALDPAAAAYLFQR;ANQAENDPTR;ATTESFEDGLK;GAEPAEQR;GHSFADPASNLGLEDIIR;GHVIYEGK;GKPYDGITTIK;GMPPLEIVPENIK;GSITQGTPALPQTGIPTEALVK;GSPHSDLK;HNLDNLLQQHK;IMPLPAGGPSISQGLPASR;ISVESIPSLR;KDPAFGGK;LEQVSDSHFQR;SAAVSEQQQLEQK;SGHILSYDNIK;SIHEIPR;STLHEAPK;VELPLYNQPSDTK;VSAAVLPLVHPLPEGLR;YDQLMEAWEK
-1.61555	-1.76715	-1.80032	-1.81557	-1.69982	-1.78803	0.0401303	0.236565	4	4	16.397	O75379	VAMP4	Vesicle-associated membrane protein 4		HLNDDDVTGSVK;HVQNQVDEVIDVMQENITK;LDELQDK;LDELQDKSESLSDNATAFSNR
1.15527	1.03563	1.12047	1.15252	1.1665	1.15495	-0.0542008	0.689374	7	7	13.711	O75380	NDUFS6	NADH dehydrogenase [ubiquinone] iron-sulfur protein 6, mitochondrial		EVNENFAIDLIAEQPVSEVETR;QKEVNENFAIDLIAEQPVSEVETR;VSPTGEK;VTHTGQVYDDKDYR;VTHTGQVYDDKDYRR;VYINLDK;VYINLDKETK
1.63254	1.55091	1.90107	1.81282	1.50182	1.44203	0.109281	0.281734	11	11	41.236	O75381	PEX14	Peroxisomal membrane protein PEX14		ASSEQAEQPSQPSSTPGSENVLPR;ATTSTNWILESQNINELK;EPLIATAVK;GGDGQINEQVEK;IPSWQIPVK;IQELAHELAAAK;QSPLATR;RGGDGQINEQVEK;RPEGASNESERD;SEINSLK;YLLPLILGGR
1.20934	1.2064	1.19841	1.21766	1.31949	1.13963	-0.0208769	0.149049	20	18	80.829	O75382	TRIM3	Tripartite motif-containing protein 3		AEITGPDGTR;AEITGPDGTRLPVPVVDHK;DNPIEDELVFR;DVVEQHK;EHGTVLLR;EKGEFTNLQGVSAASSGR;GEFTNLQGVSAASSGR;HFAGPHFVAVNNK;LGSAPEVLLVR;LPVPVVDHK;NGHIIVVDNK;QALVGQPASLTVTTK;RKDNPIEDELVFR;RPSSMYSTGGK;SPGGPGSHVR;SVLNLGALLTTSATAHETVATGEGLR;TEGELLLSVLLYGQPVR;VLQSQLDTLR;VYSADGEFLFK;WVSIFSPEGK
3.89609	3.75115	3.74408	3.96438	3.83207	3.7823	-0.0624774	0.353277	18	18	51.712	O75390	CS	Citrate synthase, mitochondrial		ALGFPLERPK;AYAQGISR;DILADLIPK;DVSDEKLRDYIWNTLNSGR;DYIWNTLNSGR;EGSGIGAIDSNLDWSHNFTNMLGYTDHQFTELTR;EVGKDVSDEK;EVGKDVSDEKLR;GFSIPECQK;GLVYETSVLDPDEGIR;HLPNDPMFK;IVPNVLLEQGK;LPCVAAK;LRDYIWNTLNSGR;LVAQLYK;SMSTEGLMK;VVPGYGHAVLR;YWELIYEDSMDLIAK
0.556917	0.581779	0.611881	0.528183	0.799233	0.535444	-0.0374276	0.154518	13	13	26.034	O75391	SPAG7	Sperm-associated antigen 7		ADLLGSILSSMEKPPSLGDQETR;ADLLGSILSSMEKPPSLGDQETRR;DAAHMLQANK;DKYSHLIGK;EFAPSDEELDSYR;EVSDFIQDSGQIK;EVSDFIQDSGQIKK;KLQEQEK;QEEEAAQQGPVVVSPASDYK;QEEEAAQQGPVVVSPASDYKDK;RGEEWDPQKAEEK;SIEEAMNEIR;YSHLIGK
-1.99254	-2.09942	-2.0158	-1.99606	-1.94042	-1.96617	-0.068373	0.879197	1	1	7.6191	O75394	MRPL33	Large ribosomal subunit protein bL33m		LTLLHYDPVVK
2.40286	2.44121	2.43536	2.47501	2.68966	2.42597	-0.103737	0.562663	14	14	24.74	O75396	SEC22B	Vesicle-trafficking protein SEC22b		ANNLSSLSK;DLQQYQSQAK;GEALSALDSK;IMVANIEEVLQR;KLAFAYLEDLHSEFDEQHGK;KLNEQSPTR;KLYIDSR;KVPTVSRPYSFIEFDTFIQK;LAFAYLEDLHSEFDEQHGK;LAFAYLEDLHSEFDEQHGKK;LNEQSPTR;NLGSINTELQDVQR;VADGLPLAASMQEDEQSGR;VLLTMIAR
2.87336	2.86268	2.8033	2.83172	2.99406	2.87591	-0.0541175	0.436491	27	25	108.8	O75400	PRPF40A	Pre-mRNA-processing factor 40 homolog A		ALEKEEEEEK;ALEKEEEEEKQK;ELEDLEGYQNTIVAGSLITK;EPAFEDITLESER;FLENHEK;FTNMLGQPGSTALDLFK;FVKEPAFEDITLESER;FYVEDLK;KEEEESQPAK;KEEEESQPAKK;KQAFNAYK;LAFNSLLEK;QAAPPIELDAVWEDIR;QAAPPIELDAVWEDIRER;QAFNAYK;QETVADFTPK;QSTWEKPDDLK;QSTWEKPDDLKTPAEQLLSK;RVPSNASWEQAMK;SDSGKPYYYNSQTK;SMWTEHK;STTLDAGNIK;TLLEQLDDDQ;TYTWNTK;TYYYNTETK;VPSNASWEQAMK;VQTEKEEKEEAR
-1.66739	-1.47469	-1.65762	-1.67553	-1.2768	-1.55968	-0.0958954	0.28928	11	10	87.793	O75410	TACC1	Transforming acidic coiled-coil-containing protein 1		AESAALHAGLR;AIGGEFSDTNAAVEGTPLPK;ANEEIAQVR;ASYHFSPEELDENTSPLLGDAR;DEGAVISQISDISNR;DSTDISAVLGTK;EIEANEWKK;EQALADLNSVER;ETPGTLSSDTNDSGVELGEESR;KIVAEYEK;MEEDGSTVLGLLESSAEK
-2.68908	-2.55908	-2.83446	-2.72936	-2.54214	-2.63103	-0.0600303	0.246919	4	4	21.142	O75414	NME6	Nucleoside diphosphate kinase 6		AYILAHK;EIAAFFPDFSEQR;GSFGLTDTR;LVEFMASGPIR
-5.1346	-4.96194	-5.13598	-5.16384	-4.57267	-4.74581	-0.250069	0.6068	3	3	114.6	O75420	GIGYF1	GRB10-interacting GYF protein 1		AAETLNFGPEWLR;AQAPNHR;EVESPYDVHDYIR
-3.89591	-3.79059	-3.74772	-3.9656	-3.61307	-4.06316	0.0691992	0.183692	5	5	73.449	O75427	LRCH4	Leucine-rich repeat and calponin homology domain-containing protein 4		AAAVAAPLAAGGEEAAATTSVPGSPGLPGR;ALEEAVATGTLNLSNR;LGALPPDIGTLGSLR;NQLSTLPEELGDLPLVR;SYDLSDITQADLSR
-0.0466938	-0.0663319	-0.0896873	-0.0361748	0.168925	0.02005	-0.118505	0.884251	6	6	29.763	O75431	MTX2	Metaxin-2		ANAEYMSPSGK;GHSLSDGLEEVQK;IEQHYFEDR;LGTQPYFFNK;QPTELDALVFGHLYTILTTQLTNDELSEK;RIEQHYFEDR
1.93649	1.91265	1.94713	1.87117	2.12424	1.91903	-0.0393915	0.192947	18	16	38.169	O75436	VPS26A	Vacuolar protein sorting-associated protein 26A		EITGIGPSTTTETETIAK;ELALPGELTQSR;EYDLIVHQLATYPDVNNSIK;FESPESQASAEQPEM;GESIPIR;HYLFYDGESVSGK;IQHMELQLIK;IYFLLVR;KEITGIGPSTTTETETIAK;LEHQGIR;LFLAGYDPTPTMR;RLEHQGIR;RLTDLVK;SNTHEFVNLVK;TEDGKVEK;YEIMDGAPVK;YEIMDGAPVKGESIPIR;YFLNLVLVDEEDRR
-1.45996	-1.28976	-1.34863	-1.36763	-1.15639	-1.33371	-0.0802043	0.414316	2	2	6.9611	O75438	NDUFB1	NADH dehydrogenase [ubiquinone] 1 beta subcomplex subunit 1		ELQPSEEVTWK;VNLLQIVR
0.914457	0.945339	0.919859	0.901228	1.12919	0.907354	-0.0527067	0.280638	12	11	54.366	O75439	PMPCB	Mitochondrial-processing peptidase subunit beta		AVEILADIIQNSTLGEAEIER;AVEILADIIQNSTLGEAEIERER;DLVDYITTHYK;EQTVYYAK;FTGSEIR;IDAVNAETIR;IVLAAAGGVSHDELLDLAK;KDLVDYITTHYK;RIPIPELEAR;SPAIAAVGPIK;STQAATQVVLNVPETR;TILGPTENIK
-2.5061	-2.48678	-2.53006	-2.49681	-2.42317	-2.50018	-0.0342614	0.538604	3	3	23.306	O75446	SAP30	Histone deacetylase complex subunit SAP30		AAGNASFSK;LPTRPGLNK;SIPVNEKDTLTYFIYSVK
-1.9658	-1.88432	-1.95439	-1.92496	-1.81686	-1.92403	-0.0462186	0.452455	10	10	110.3	O75448	MED24	Mediator of RNA polymerase II transcription subunit 24		ALLHIAK;EGLEAGTPAAGEK;EVLTDIFAK;GSVLQFMPFTTVSELVK;HREDIEDYISLFPLDDVQPSK;LEEASSWTAIEHSLLK;LGEILANLSNPQLR;LLSSNEDDANILSSPTDR;SLDLLLAAAAATGK;VVLAITDLSLPLGR
4.6324	4.54803	4.50658	4.54789	4.67838	4.60072	-0.0466572	0.368362	37	36	60.103	O75475	PSIP1	PC4 and SFRS1-interacting protein		ASNEDVTK;AVDITTPK;DFKPGDLIFAK;DIFPYSENK;DIFPYSENKEK;DNHEASTK;EDTDHEEK;EDTDHEEKASNEDVTK;ETEISLK;ETSMDSR;ETSVSKEDTDHEEK;FSSQQAATK;GFNEGLWEIDNNPK;GRPAATEVK;GYPHWPAR;HTEMITTLK;IDNLDVNR;KDEEGQK;KDEEGQKEEDKPR;KGFNEGLWEIDNNPK;KKPSSEER;KKPSSEERETEISLK;KQEEQMETEQQNKDEGK;LEKEQTGSK;LPIFFFGTHETAFLGPK;NFQTAHR;NMFLVGEGDSVITQVLNK;QHEEANK;QPCPSESDIITEEDK;QPCPSESDIITEEDKSK;QSNASSDVEVEEK;QSNASSDVEVEEKETSVSK;QVETEE…
1.36871	1.43833	1.44468	1.44333	1.68487	1.40833	-0.0949373	0.453086	17	10	39.171	O75477	ERLIN1	Erlin-1		ADAEYYAAHK;AKADAEYYAAHK;AVIEAEK;DLNLMAPGLTIQAVR;EAETERK;EALEPSGENVIQNK;IEVVNMLAPYAVFDIVR;ISEIEDAAFLAR;KAVIEAEK;LLIAAQK;LTPEYLELK;LTPEYLELKK;SVQTTLQTDEVK;TKLLIAAQKQK;VMEKETEK;VVEKEAETER;YQAIASNSK
0.24304	0.203949	0.168816	0.350714	0.305083	0.168642	-0.0695448	0.519952	7	5	62.411	O75487	GPC4	Glypican-4;Secreted glypican-4		DLFVELK;DLFVELKR;ELLENAEK;LEGPFNIESVMDPIDVK;SISESAFSAR;TFAQGLAVAGDVVSK;YTEQLKPFGDVPR
2.10463	2.02041	2.01813	2.02968	2.24635	2.13391	-0.0889222	0.576113	17	17	30.241	O75489	NDUFS3	NADH dehydrogenase [ubiquinone] iron-sulfur protein 3, mitochondrial		AANWYER;DFPLSGYVELR;DHTNAQFK;EIWDMFGVFFANHPDLR;ESAGADTRPTVRPR;FDLNSPWEAFPVYR;ILTDYGFEGHPFR;KDFPLSGYVELR;KFDLNSPWEAFPVYR;LEAGDKKPDAK;QLSAFGEYVAEILPK;QPPESLK;SLVDLTAVDVPTR;TYTDELTPIESAVSVFK;VVAEPVELAQEFR;VVAEPVELAQEFRK;YDDEVKR
-0.559998	-0.56476	-0.849762	-0.876225	-0.637681	-0.907177	0.148854	0.508538	3	3	36.238	O75493	CA11	Carbonic anhydrase-related protein 11		GTLYNTGR;LSTGGEK;VLYDPFLPPLR
1.91082	1.75642	1.84272	1.85529	1.95813	1.94355	-0.0823336	0.680049	13	10	31.3	O75494	SRSF10	Serine/arginine-rich splicing factor 10		DAEDALHNLDR;DAEDALHNLDRK;GFAYVQFEDVR;GFAYVQFEDVRDAEDALHNLDR;GFAYVQFEDVRDAEDALHNLDRK;KTPNQMK;NVADDTR;NVADDTRSEDLR;NVYSSSR;QIEIQFAQGDR;QIEIQFAQGDRK;SFDYNYR;YGPIVDVYVPLDFYTR
1.14393	1.01987	1.51108	1.29905	1.05306	1.01944	0.101113	0.230774	6	6	41.496	O75503	CLN5	Bis(monoacylglycero)phosphate synthase CLN5;Bis(monoacylglycero)phosphate synthase CLN5, secreted form		IMHDAIGFR;ITYEEIPLPIR;LAEFGAEFK;LQAPVWEFK;TLGLAIK;YGDLLGHLK
0.594526	0.651142	0.667799	0.658625	0.795384	0.602985	-0.0478423	0.319834	10	10	43.585	O75521	ECI2	Enoyl-CoA delta isomerase 2		ATEMLIFGK;DFENSMNQVK;IMFNRPK;KDPGNEVK;KSTGFETLVVTSEDGITK;NNAVLLR;QNYVDLVSSLSPSLESSSQVEPGTDR;QNYVDLVSSLSPSLESSSQVEPGTDRK;STGFETLVVTSEDGITK;WDAWNALGSLPK
0.860525	0.860466	0.812668	0.758024	1.04939	0.850008	-0.0412544	0.179326	11	8	38.799	O75525	KHDRBS3	KH domain-containing, RNA-binding, signal transduction-associated protein 3		AKEEELR;DKAKEEELR;DSLDPSFTHALR;FLIPDYNDEIR;GVPAPAITR;LQEETLTK;LVNQEIEK;MGHALEEIKK;YIDVVINK;YLPELMAEK;YLPELMAEKDSLDPSFTHALR
-2.46154	-2.4488	-2.56407	-2.43292	-2.38716	-2.41686	-0.0791559	0.95314	2	2	48.902	O75528	TADA3	Transcriptional adapter 3		IQEYEFTDDPIDVPR;WAQEDLLEEQK
-2.62959	-2.68455	-2.7961	-2.75026	-2.73464	-2.73495	0.0365359	0.30153	5	5	50.197	O75530	EED	Polycomb protein EED		EGDPLVFATVGSNR;IHFPDFSTR;IKPSESNVTILGR;LYVWDLEVEDPHK;WLGDLILSK
1.33541	1.24043	1.21647	1.28164	1.58147	1.23335	-0.101378	0.369558	5	5	10.058	O75531	BANF1	Barrier-to-autointegration factor;Barrier-to-autointegration factor, N-terminally processed		AYVVLGQFLVLK;DFVAEPMGEKPVGSLAGIGEVLGK;HRDFVAEPMGEKPVGSLAGIGEVLGK;KDEDLFR;KDEDLFREWLK
4.12042	4.12912	4.12425	4.11791	4.24869	4.1234	-0.0387354	0.380444	53	53	145.83	O75533	SF3B1	Splicing factor 3B subunit 1		AAGLATMISTMRPDIDNMDEYVR;AALDEAQGVGLDSTGYYDQEIYGGSDSR;AIGPHDVLATLLNNLK;AIGYLIPLMDAEYANYYTR;AIVNVIGMHK;AKGSETPGATPGSK;ATVNTFGYIAK;DTPGHGSGWAETPR;DYIYAVTPLLEDALMDR;DYIYAVTPLLEDALMDRDLVHR;EFGAGPLFNQILPLLMSPTLEDQER;EFQSPDEEMK;EFQSPDEEMKK;EIISNLAK;FAGYVTSIAATELEDDDDDYSSSTSLLGQK;GAEYVSAR;GDTPGHATPGHGGATSSAR;GGDSIGETPTPGASK;GLAAFLK;GSETPGATPGSK;IADREDEYKK;ILVVIEPLLIDEDYYAR;IMGNLGAADIDHK;IVDDLKDEAEQYR;IVD…
2.69178	2.64207	2.66468	2.65514	2.70829	2.66137	-0.00875696	0.147523	30	30	88.884	O75534	CSDE1	Cold shock domain-containing protein E1		ATNIEVLSNTFQFTNEAR;AVAAPRPDR;DQFGFINYEVGDSK;DQFGFINYEVGDSKK;DVEGSTSPQIGDK;DVEGSTSPQIGDKVEFSISDK;EAFGFIER;EATFSNPK;EIFFHYSEFK;ELPFGDKDTK;ETGVIEK;EVATDVR;FLGTVEK;FNISTDRR;GDLETLQPGDDVEFTIK;GEVYPFGIVGMANK;GPDNSMGFGAER;HTGAVSAR;IKQEILPEER;IKVDFVIPK;INFVIDNNK;LLGYVATLK;LLTSYGFIQCSER;NITLDDASAPR;NQNDPLPGR;SKVTLLEGDHVR;TGKPIAVK;VDFVIPK;VGDDVEFEVSSDRR;VTLLEGDHVR
-1.41255	-1.30321	-1.39097	-1.39957	-1.23765	-1.44277	-0.00891399	0.0429133	3	3	42.506	O75554	WBP4	WW domain-binding protein 4		AYQEDLKR;LGLESEILEPSITPVTSTIPPTSTSNQQK;TVTSLGVMADGVAPVFK
2.41537	2.42665	2.44104	2.35356	2.58674	2.36271	-0.00665506	0.029212	11	11	34.404	O75569	PRKRA	Interferon-inducible double-stranded RNA-dependent protein kinase activator A		AAEAAINILK;AEAPPLER;EDSGTFSLGK;LESFMETGK;LPEYTLSQEGGPAHK;MITAKPGK;NQLNPIGSLQELAIHHGWR;SDVQIHVPTFTFR;SLLSIPNTDYIQLLSEIAK;TPIQVLHEYGMK;VTVGDITCTGEGTSK
0.88826	0.845392	0.815531	0.925831	1.0168	0.856859	-0.0834366	0.75324	17	16	89.864	O75582	RPS6KA5	Ribosomal protein S6 kinase alpha-5		ATFHAFNK;DADEIKEHLFFQK;DLIQGLLTVDPNKR;DLKPENLLFTDENDNLEIK;EFVADETER;EHLFFQK;GDFSFEGEAWK;GGDSGHDK;IIDFGFAR;INWDDLAAK;KGDFSFEGEAWK;LKPPDNQPLK;MEEEGGSSGGAAGTSADGGDGGEQLLTVK;QVLEHIR;TANLTGHAEK;TLQPSNPADSNNPETLFQFSDSVA;VGIENFELLK
-3.49514	-3.10296	-3.45922	-3.70588	-2.87614	-3.2024	-0.0909634	0.122199	2	2	28.424	O75586	MED6	Mediator of RNA polymerase II transcription subunit 6		EAEPIPETVKPEEK;GYWWHFK
1.69417	1.69804	1.80378	1.65031	1.80836	1.64411	0.0310678	0.183174	39	39	513.63	O75592	MYCBP2	E3 ubiquitin-protein ligase MYCBP2		ALLSSPEGEEK;ALSVVSTVVR;ALTVQLK;ASFYGFK;AVVEETSK;DAIYSDSSSLVTDLK;DLLDPIKELYEDVR;DLLDPIKELYEDVRR;DLTSIVDIK;EDYSVVNR;EGISEDLPVK;ELDGQEAR;ENSEQEKDTR;EPPLHEK;FHPELSK;FPLLVAHMEK;GDGSKPLEPAK;GEDGESTK;GHYQLLLSGR;GIPIGMLVLGNK;GQIPQILYYR;GSTPTQISEIIIK;GTESLSASESLILK;GTTITGTAGTTVGK;GTYTTDDSPSDIAEIR;GVTTVTLPMIFNSSYLR;IFATSTEPVLQQELQLK;INHIVLK;LASIIGVK;LDVSYEPMIVK;LEYEGLHK;LISGDAEPTPEQEEK;LITSQVFGK;NAIAETIIAL…
-3.19479	-2.94691	-3.17016	-3.1628	-2.48478	-3.0972	-0.189026	0.340034	4	4	45.285	O75600	GCAT	2-amino-3-ketobutyrate coenzyme A ligase, mitochondrial		ALGGASGGYTTGPGPLVSLLR;GTDELLGVMDQVTIINSTLGK;HLDMADLEAK;VQISAVHSEEDIDR
-4.31114	-4.55248	-4.31681	-4.62243	-4.26186	-4.40756	0.0371367	0.101478	1	1	19.343	O75607	NPM3	Nucleoplasmin-3		AAGTAAALAFLSQESR
1.19256	1.17409	1.11572	1.24616	1.25256	1.34251	-0.119622	1.43466	4	4	24.669	O75608	LYPLA1	Acyl-protein thioesterase 1		ALIDQEVK;ASFPQGPIGGANR;QAAENIK;TLVNPANVTFK
-0.59775	-0.421509	-0.145639	-0.48064	-0.264144	-0.488934	0.02294	0.0523629	2	2	24.074	O75629	CREG1	Protein CREG1		LPPLPPREDAAR;TWPSSHNWFFAK
4.78201	4.74869	4.71307	4.74424	4.83263	4.7687	-0.0339327	0.44098	94	94	244.5	O75643	SNRNP200	U5 small nuclear ribonucleoprotein 200 kDa helicase		ADEVLEILK;AGRPQYDTK;AIFEIVLNR;ANSNLVLQADR;DEDRHDINK;DEPTGEVLSLVGK;DIDAFWLQR;DILCGAADEVLAVLK;DLIPYLEK;DLLPYGFAIHHAGMTR;DTLGLFLR;EEEKLELQK;EEEVTGPVIAPLFPQK;EEEVTGPVIAPLFPQKR;EEGWWVVIGDAK;EGSASTEVLR;EIDLLLGQTDDTR;ESIEEPSAK;FLYQLHETEKEDLIR;FLYQLHETEKEDLIREER;FNDPHVK;FQIMNEIVYEK;FYDDAIVSQK;GDPLLDQR;GLFYFDNSFRPVPLEQTYVGITEK;GLIEIISNAAEYENIPIR;GNIIISTPEK;GPVLEALVAR;GTQVYSPEK;GVESVFDIMEMEDEER;GYTLLSEGIDE…
2.14349	2.15404	2.09872	2.08344	2.22843	2.01033	0.0246865	0.137568	12	12	31.444	O75663	TIPRL	TIP41-like protein		EVIKPYDWTYTTDYK;GTLLGESLK;IDGVLIR;IDPNPADSQK;IQHGSGFGIEFNATDALR;LADELHMPSLPEMMFGDNVLR;LYHEADK;LYHEADKTYMLR;MMIHGFQSSHR;TEGEHSK;VMPSSFFLLLR;VVPTTDHIDTEK
-1.64639	-1.61938	-1.83905	-1.7511	-1.43837	-1.7188	-0.0655165	0.209736	4	4	52.988	O75674	TOM1L1	TOM1-like protein 1		EATNTTSEPSAPSQDLLDLSPSPR;EVYLDLVK;QETAQISSNPPTSVPTAPALSSVIAPK;TWSQGFPGGVDVSEVK
-2.088	-1.87952	-2.0801	-2.03063	-1.6512	-2.15099	-0.0716022	0.162868	6	5	85.605	O75676	RPS6KA4	Ribosomal protein S6 kinase alpha-4		AGGHDAGK;GGELLEHIR;IIDFGFAR;SELDVGNFAEEFTR;VSVENFELLK;VYGGEIVLALEHLHK
-0.697086	-0.718786	-0.677198	-0.752464	-0.657256	-0.779734	0.0321277	0.340513	4	4	41.45	O75683	SURF6	Surfeit locus protein 6		DAYLQSLAK;ELSPAALEK;EPPGLIFNK;ILPQDLER
1.23914	1.27842	1.26627	1.26669	1.43326	1.25447	-0.0568622	0.410631	13	11	52.642	O75688	PPM1B	Protein phosphatase 1B		ALGDYDYK;DSELDKHLESR;ESDGASDEAEESGSQGK;GPTEQLVSPEPEVYEILR;ILSAENIPNLPPGGGLAGK;IQNAGGSVMIQR;QLLEEMLTSYR;SGEEGMPDLAHVMR;SGSALELSVENVK;SGSTAVGVMISPK;VEEIMEK;VSDEAVKK;YGLSSMQGWR
-0.965162	-0.953449	-0.90695	-0.952225	-0.771029	-0.935196	-0.0557038	0.388388	5	5	43.395	O75689	ADAP1	Arf-GAP with dual PH domain-containing protein 1		AVDRPMLPQEYAVEAHFK;AVLELLQRPGNAR;EWVAAFQK;IEHLNATFQPAK;LDAWEEAQVEFMASHGNDAAR
2.60321	2.62138	2.62662	2.58084	2.77353	2.57655	-0.026569	0.151746	26	26	155.2	O75694	NUP155	Nuclear pore complex protein Nup155		AAPQSPSVPK;AGIFQPHVR;DPQGLGLHFYK;ELQEQLK;ELSDSVTLSSSDR;FHEAQLSEK;FYEGVVELSLTAAEK;GLQEFLDR;GVIQVYDLGQDGQGMSR;HGEPEEDIVGLQAFQER;HLLVSNVGGDGEEIER;IITPLNK;ISLQAIQQLVR;IYAGTPR;KDPQGLGLHFYK;KFHEAQLSEK;LADMHSTEISLQQR;LLEVYDQLFK;LLQVASPFLEPHLVR;LPPGFSASSTVEKPSK;LRPVDQLR;LYGEFADPFK;SFSNAAR;SSTAISSIAADGEFLHELEEK;SYQALALWK;VASVSQNAIVSAAGNIAR
1.44797	1.39801	1.42831	1.52069	1.59995	1.44138	-0.095912	0.93367	10	10	39.641	O75695	RP2	Protein XRP2		APDFLPLLNK;DYMFSGLKDETVGR;EKAPDFLPLLNK;ESRPENEEERPK;ETASGDVDSFYNFADIQMGI;GFFLVQTK;KLIDEMVGK;MFVSESK;QYSWDQR;VSTEANR
0.278757	0.278696	0.357868	0.306452	0.451364	0.370493	-0.0709956	0.647661	8	8	46.561	O75718	CRTAP	Cartilage-associated protein		AIAAAHTFLLK;FLQFAYFK;HPDDEMMKR;LFGGLLR;SLPGAEDYIK;SLPGAEDYIKDLETK;SYESLFIR;TSITDMELALPDFFK
2.18307	2.15572	2.24032	2.22012	2.27857	2.16846	-0.0293474	0.294238	25	20	74.761	O75746	SLC25A12	Electrogenic aspartate/glutamate antiporter SLC25A12, mitochondrial		AAVAATQ;DLGIFGLYK;DVEVTKEEFAQSAIR;EEFAQSAIR;EEGPSAFWK;FGLYLPK;FKSPSVAVVQPK;GSGSVVGELMYK;HLNYTEFTQFLQELQLEHAR;IADLPPANPDHIGGYR;IAPLAEGALPYNLAELQR;KDVEVTK;KDVEVTKEEFAQSAIR;KIYSTLAGTR;LATATFAGIENK;LHFGHNR;LQVAGEITTGPR;LTLADIER;LTVNDFVR;NIFLQYASTEVDGER;SPSVAVVQPK;SSPQFGVTLVTYELLQR;YEGFFGLYR;YLGLYNDPNSNPK;YMTPEDFVQR
2.58541	2.4917	2.42614	2.52935	2.55976	2.54643	-0.0440957	0.396122	20	20	42.075	O75781;Q9Y2D5	PALM	Paralemmin-1		ADEVTLSEAGSTAGAAETR;APAPSPAK;EENQAGPEATTSDPQDLDMKK;EIEVLER;ENAAAPSPVR;GAVEGAAR;GDSAPATAK;KTEVVMNSQQTPVGTPK;LEKEIEVLER;LLEDSVSR;LQAIAEK;MEVLAAETTSQQER;QAEIENK;QLEDERR;QMQDDEQK;QPLPLGIK;VSNTPLR;VYEDETK;WLLEGTPSSASEGDEDLR;WLLEGTPSSASEGDEDLRR
-0.157476	-0.0463505	-0.086956	-0.0718575	-0.0497732	-0.0804787	-0.0295579	0.366224	9	9	39.008	O75787	ATP6AP2	Renin receptor;Renin receptor N-terminal fragment;Renin receptor C-terminal fragment		ANSVFEDLSVTLR;DHSPDLYSLELAGLDEIGK;DHSPDLYSLELAGLDEIGKR;EDLSWPGLAVGNLFHRPR;ILVDALQK;IPDVAALSMGFSVK;LFQENSVLSSLPLNSLSR;SPGSVVFR;YGEDSEQFR
-3.61311	-3.43544	-3.50169	-3.59025	-3.11788	-3.54451	-0.0992053	0.246637	4	4	33.395	O75792	RNASEH2A	Ribonuclease H2 subunit A		EHVEPVFGFPQFVR;GLESATSL;LADLEALK;LQDLDTDYGSGYPNDPK
-2.58705	-2.36198	-2.26689	-2.52579	-2.02789	-2.48048	-0.0605885	0.119252	1	1	50.343	O75800	ZMYND10	Zinc finger MYND domain-containing protein 10		WHTVAPSEQQK
-2.60545	-2.69829	-2.69962	-2.75257	-2.64073	-2.83302	0.0743148	0.509566	1	1	15.651	O75817	POP7	Ribonuclease P protein subunit p20		GAVEAELDPVEYTLR
1.98283	1.90564	1.91124	1.9204	1.98579	1.94539	-0.0172923	0.21455	19	19	35.611	O75821	EIF3G	Eukaryotic translation initiation factor 3 subunit G		ADDNATIR;DKTTGQSK;DTLGPMQK;EKLPGELEPVQATQNK;ELAEQLGLSTGEK;ELAEQLGLSTGEKEK;ELAEQLGLSTGEKEKLPGELEPVQATQNK;ETDLQELFRPFGSISR;FGNSEFDPPGPNVATTTVSDDVSMTFITSK;GFAFISFHR;GIPLATGDTSPEPELLPGAPLPPPK;IDEDGKK;LPGELEPVQATQNK;RADDNATIR;RGESMQPNR;RGESMQPNRR;VTNLSEDTR;VTNLSEDTRETDLQELFRPFGSISR;YVPPSLR
1.76875	1.8177	1.87348	1.82131	1.95616	1.84521	-0.0542504	0.455078	13	13	29.062	O75822	EIF3J	Eukaryotic translation initiation factor 3 subunit J		AAAAAAAGDSDSWDADAFSVEDPVR;AAAAAAAGDSDSWDADAFSVEDPVRK;DDFTEFGK;DKITQYEK;ETFGVNNAVYGIDAMNPSSR;GVVPGGGLK;KGVVPGGGLK;KLQEESDLELAK;LEEPEEPK;LQEESDLELAK;RLEEPEEPK;VLTPEEQLADK;VLTPEEQLADKLR
-1.01321	-1.10836	-1.08589	-0.929373	-0.945241	-0.802246	-0.176868	1.52392	4	2	30.85	O75828	CBR3	Carbonyl reductase [NADPH] 3		FHQLDIDDLQSIR;GQAAVQQLQAEGLSPR;LGVTVLSR;TVEEGAETPVYLALLPPDATEPQGQLVHDK
2.79593	2.68899	2.78346	2.84768	2.80791	2.78542	-0.0575444	0.682088	10	10	24.428	O75832	PSMD10	26S proteasome non-ATPase regulatory subunit 10		DHYEATAMHR;EEKTPLQVAK;ESILADK;GGLGLILK;HEIAVMLLEGGANPDAK;LEELKESILADK;LLVSQGASIYIENK;LLVSQGASIYIENKEEK;NRHEIAVMLLEGGANPDAK;TPLQVAK
-1.35143	-1.46853	-1.54534	-1.44571	-1.4149	-1.55666	0.0173235	0.0866759	3	3	87.116	O75843	AP1G2	AP-1 complex subunit gamma-like 2		AVEYDTLFR;GGLPITQLFR;GYALTALMK
1.90427	1.84265	1.90437	2.0152	1.99607	1.96016	-0.106716	1.82241	13	13	54.812	O75844	ZMPSTE24	CAAX prenyl protease 1 homolog		AKDLYSALIK;DIQEDSGMEPR;DLYSALIK;FTPLPEGK;GMWASLDALWEMPAEK;LKEEIEVMAK;NEEEGNSEEIK;NEEVLAVLGHELGHWK;RFEFQADAFAK;SIDFPLTK;SSHSNAYFYGFFK;TTTHVPPELGQIMDSETFEK;VYVVEGSK
-3.92306	-3.86434	-3.84158	-3.96227	-3.68269	-3.97206	-0.0039854	0.0134587	5	5	74.766	O75864	PPP1R37	Protein phosphatase 1 regulatory subunit 37		ELEELLLEASQESGQETL;LDLDREPK;QLQEFTDLGHR;VNHSLLR;VTFPSDEDIVSGAVEPK
3.6474	3.64187	3.63646	3.70094	3.80395	3.71383	-0.0976655	1.39848	24	23	46.659	O75874	IDH1	Isocitrate dehydrogenase [NADP] cytoplasmic		ATDFVVPGPGK;DAAEAIK;DAAEAIKK;DATNDQVTK;DIFQEIYDK;EKLIFPYVELDLHSYDLGIENR;FKDIFQEIYDK;GLPNVQR;GQETSTNPIASIFAWTR;GWPLYLSTK;HAYGDQYR;IIWELIK;ISGGSVVEMQGDEMTR;KISGGSVVEMQGDEMTR;LIDDMVAQAMK;LIFPYVELDLHSYDLGIENR;LVSGWVKPIIIGR;NILGGTVFR;SDYLNTFEFMDK;SIEDFAHSSFQMALSK;SQFEAQK;TVEAEAAHGTVTR;VEITYTPSDGTQK;VTYLVHNFEEGGGVAMGMYNQDK
-1.83529	-1.77567	-1.78001	-1.85725	-1.61407	-1.85622	-0.021142	0.0905557	6	6	61.863	O75879	GATB	Glutamyl-tRNA(Gln) amidotransferase subunit B, mitochondrial		AIDYEIQR;ETLPELPSVTR;QVFEELWK;RCVEAAVMTGLALNCHINK;SLHDNLR;TPGQIVSEK
0.913492	0.733084	0.700922	0.755821	0.946906	0.708082	-0.0211039	0.0753023	5	5	33.814	O75880	SCO1	Protein SCO1 homolog, mitochondrial		EAIANYVK;EEVDQVAR;GPGDSTRPSKPGPVSWK;HIGKPLLGGPFSLTTHTGER;LVGLTGTREEVDQVAR
-3.87669	-3.82193	-3.6901	-3.77149	-3.67889	-3.83466	-0.0345583	0.184337	3	3	58.255	O75881	CYP7B1	Cytochrome P450 7B1		AFSISQLQK;LLFGIQYPDSDVLFR;QVFEPQLLK
0.732286	0.706734	0.628014	0.707836	0.850179	0.700247	-0.0637426	0.477088	10	9	158.54	O75882	ATRN	Attractin		AAVLSVFVR;ALYVHGGYK;EEYSNLK;ENYDNAK;LADDLYR;LTGSSGFVTDGPGNYK;LTLTPWVGLR;SVNNVVVR;YGHSLALYK;YQGNPLR
1.91544	1.86373	1.87083	1.98305	1.95627	1.95974	-0.0830202	1.98279	7	7	21	O75884	RBBP9	Serine hydrolase RBBP9		ASGYFTRPWQWEK;EQQEVADR;EQQEVADRLETK;IPGFQCLAK;NMPDPITAR;TIIIGHSSGAIAAMR;VYAIVLVSAYTSDLGDENER
0.736403	0.714008	0.705521	0.744978	0.848109	0.672396	-0.0365171	0.284205	12	11	58.164	O75886	STAM2	Signal transducing adapter molecule 2		AIELSLQEQK;ALYDFEAVEDNELTFK;DFATEVR;DPQFSLISATIK;HSELSELNVK;LNVIDDDVEEIK;LNVIDDDVEEIKK;NKEDEDIAK;PLFTANPFEQDVEK;QQHTETK;SEPEPVYIDEDKMDR;VLEALELYNK
-1.17033	-1.1846	-1.25346	-1.18818	-1.12635	-1.20256	-0.0304295	0.366302	4	4	12.074	O75896	TUSC2	Tumor suppressor candidate 2		AVPPFVFTR;GLWPFASAAGGGGSEAAGAEQALVRPR;IHVDFPVILYEV;NLIPQGIVK
-3.73674	-3.63206	-3.90795	-3.76214	-3.56991	-3.92418	-0.00684261	0.0174553	1	1	55.278	O75907	DGAT1	Diacylglycerol O-acyltransferase 1		ASSAAAPHTVSYPDNLTYR
-1.35836	-1.32054	-1.38346	-1.43093	-1.18844	-1.35785	-0.0283823	0.141931	8	8	64.239	O75909	CCNK	Cyclin-K		AAEPPPPK;AVVVSPK;DLAHTPSQLEGLDPATEAR;DPQQPAQQQQPAQQPK;FDLQVEHPYQFLLK;FIFDVGTR;IETTHPPLPPAHPPPDR;ILLQTIK
0.614433	0.579842	0.550293	0.773764	0.732799	0.740305	-0.167433	2.7658	6	6	33.548	O75911	DHRS3	Short-chain dehydrogenase/reductase 3		ENVLITGGGR;FPNLFPPLKPETVAR;SILPQAALEEIHK;SLMDSDDDALLK;SQHINTLGQFWTTK;VGDITILVNNAAVVHGK
-1.09702	-1.1801	-1.14353	-1.18859	-1.0294	-1.19756	-0.00170231	0.00939056	18	8	62.309	O75914	PAK3	Serine/threonine-protein kinase PAK 3		ALYLIATNGTPELQNPER;ELIINEILVMR;ELLQHPFLK;ETVNNQK;EVTPPSAENANSSTLYR;KELIINEILVMR;KNPQAVLDVLK;LAKPLSSLTPLIIAAK;LLQTSNITK;LTDFGFCAQITPEQSK;MTDEEILEK;QMNLQQQPK;SDGLDNEEKPPAPPLR;SDNILLGMDGSVK;SIFPGGGDK;SIVSVGDPK;STMVGTPYWMAPEVVTR;SVVESIASPAVPNK
2.92934	2.81648	2.83825	2.9463	3.00707	2.87997	-0.0830876	0.757708	7	7	21.614	O75915	ARL6IP5	PRA1 family protein 3		AWDDFFPGSDR;FARPDFR;LTDYISK;MDVNIAPLR;MEGIGLK;RTPMGIVLDALEQQEEGINR;TPMGIVLDALEQQEEGINR
-1.65566	-1.70068	-1.77378	-1.90609	-1.42411	-1.86258	0.0208915	0.0452661	5	3	71.835	O75925	PIAS1	E3 SUMO-protein ligase PIAS1		EKLTADPDSEIATTSLR;ESHSHTVTNR;LTADPDSEIATTSLR;MADSAELK;TPSLPAVDTSYINTSLIQDYR
1.27918	1.23246	1.14088	1.29143	1.33887	1.29445	-0.0907424	0.97954	11	11	26.131	O75934	BCAS2	Pre-mRNA-splicing factor SPF27		AGTGLVAGEVVVDALPYFDQGYEAPGVR;EAAAALVEEETRR;EMESNWVSLVSK;HIQDLNWQR;QPIELLSMK;QQHGEANK;QQHGEANKENIR;RYELPAPSSGQK;TIVQLENEIYQIK;VYNENLVHMIEHAQK;YELPAPSSGQK
1.23593	1.12666	1.12242	1.17301	1.19428	1.13432	-0.00553163	0.0460441	10	10	21.119	O75935	DCTN3	Dynactin subunit 3		AGLTDLQR;ALLEEYNK;AVPEHAAR;IAIPDASK;KIEDLIK;TTMLLSK;VADGLVK;VQVALGNISSK;WVYGPGGAR;YLDPEYIDR
3.34626	3.27331	3.23116	3.30498	3.28955	3.36004	-0.0346104	0.36238	17	17	29.841	O75937	DNAJC8	DnaJ homolog subfamily C member 8		AASGESGTSGGGGSTEEAFMTFYSEVK;AFEAVDK;ALDVIQAGK;DSVLTSK;EEEIEAQEK;EGKPTIVEEDDPELFK;EYVEHTVK;KEGKPTIVEEDDPELFK;LFAELEIK;LLLDQEQK;LLLDQEQKK;LTRPGSSYFNLNPFEVLQIDPEVTDEEIK;NFQANTK;QLSILVHPDK;QLSILVHPDKNQDDADR;QREEEIEAQEK;TFLRPPK
1.10222	1.12581	1.16987	1.13372	1.20166	1.1957	-0.0443926	0.686834	7	7	26.711	O75940	SMNDC1	Survival of motor neuron-related-splicing factor 30		AQLQQVEAALSGNGENEDLLK;DLLSTQPSETLASSDSFASTQPTHSWK;DLQEVIELTK;EDSGNKPMSK;ELEQEREDQK;IKELEQEREDQK;SIFASPESVTGK
3.31605	3.24239	3.2422	3.36344	3.3324	3.37446	-0.0898905	1.50526	14	14	18.491	O75947	ATP5PD	ATP synthase subunit d, mitochondrial		AGLVDDFEK;AGLVDDFEKK;AIASSLK;IVEYEKEMEK;KKYPYWPHQPIENL;KYPYWPHQPIENL;LAALPENPPAIDWAYYK;NLIPFDQMTIEDLNEAFPETK;SWNETLTSR;TIDWVAFAEIIPQNQK;VPVPEDK;VPVPEDKYTAQVDAEEKEDVK;YPYWPHQPIENL;YTAQVDAEEKEDVK
-2.64001	-2.59019	-2.66276	-2.81151	-2.46723	-2.8199	0.06856	0.22707	9	9	39.133	O75953	DNAJB5	DnaJ homolog subfamily B member 5		DGTNVLYSALISLK;EGDATPDNIPADIVFVLK;EIAEAYDVLSDPK;FKEIAEAYDVLSDPK;GDLIVEFK;GLYDQYGEEGLK;ILHIVIK;RAPEPLYPR;VQDPPVVHELR
-3.50786	-3.60217	-3.23681	-3.21302	-3.3722	-3.67056	-0.0303583	0.0608169	1	1	26.779	O75954	TSPAN9	Tetraspanin-9		EGLLLYHTENNVGLK
1.90888	1.80295	1.78284	1.72837	2.05354	1.79334	-0.0268647	0.0895208	25	25	47.355	O75955	FLOT1	Flotillin-1		AAYDIEVNTR;AEAEQMAK;AIMAHMTVEEIYKDR;AQADLAYQLQVAK;AQQVAVQEQEIAR;DIHDDQDYLHSLGK;GEAEAFAIGAR;HGVPISVTGIAQVK;IGEAEAK;ISLNTLTLNVK;ITLVSSGSGTMGAAK;KAAYDIEVNTR;KAEAFQLYQEAAQLDMLLEK;KPAEAER;LPESVER;LPQVAEEISGPLTSANK;LTGVSISQVNHKPLR;QQIEEQR;SPPVMVAGGR;SQLIMQAEAEAASVR;TEAEIAHIALETLEGHQR;VASSDLVNMGISVVSYTLK;VQVQVVER;VSAQYLSEIEMAK;VTGEVLDILTR
1.44908	1.45479	1.41021	1.38205	1.61376	1.31408	0.00139586	0.00498172	35	32	346.9	O75962	TRIO	Triple functional domain protein		AFAAALDER;AHLGEVLEAVR;AMDVLPILK;APEQQVK;APIEDLDLEGQK;ASLDTSELER;ASLGTLPLGKPR;DAAHELNEEK;DFFLGELEK;DLADIAAFFR;DSAISSNK;EGEDLIQQLR;EHEQFQHAIEK;ELWTWLEELQK;FEFETNMVSLEGLTK;GALKEPIHIPK;GGPILTFPAR;HLFLFEMSLVFSK;HLQAEVK;LEELQDILAK;LGSLFVK;LLLQDTFLVTDQDAGLLPR;LLVRPTSSETPSAAELVSAIEELVK;LQHHADK;LQLTDLLIKPVQR;NFLNALTSPIEYQR;NILNELFQR;QIASQLEQEWK;QTWIHEINQILENQR;RHEDFEEVAQNTYTNADK;SLQLDIIPASIPGSEVK;TPTSDNK;…
1.77378	1.6613	1.77438	1.90497	1.83286	1.85345	-0.127268	1.37301	6	6	11.428	O75964	ATP5MG	ATP synthase subunit g, mitochondrial		GIIGYDV;IVNSAQTGSFK;KIVNSAQTGSFK;LATFWYYAK;TPALVNAAVTYSKPR;VELVPPTPAEIPR
1.92841	1.95171	1.97282	1.98909	2.14277	1.98845	-0.0891237	0.776274	37	36	221.62	O75970	MPDZ	Multiple PDZ domain protein		AGPFHSER;AKDTVQLVIAR;ALHAAER;ATHDEAINVLR;DADLSPVNASIIK;DASHEQAVEAIR;DIPELPEREEGEGEESELQNTAYSNWNQPR;ENYEKDEDFLSSTR;ETEPTVTTSDAAVDLSSFK;GAPSGTVR;GDVANEDKLSLLK;GELGIFVQEIQEGSVAHR;GGIADADGR;GHSGLGLSLAGNK;GLGLSIVGK;GSLPQLVSPIVSR;HSLIGPDIK;HVLEDSPAGK;IGDTDLAGMSSEQVAQVLR;IGVAKPLPLSPEEGYVSAK;ISLGQQSGR;ISQDVDKEDEFGYSWK;ITYVPAEHLEEFK;KATHDEAINVLR;KLEPSGIFVK;KNALASEIQGLR;LTIHAENPDSQAVPSAAGAASGEK;NATQEAVAALL…
2.58848	2.58398	2.55594	2.56284	2.71897	2.58445	-0.0459534	0.38813	33	33	152.93	O75976	CPD	Carboxypeptidase D		AIIENLIQK;ALIEWIR;ATGIYSK;AVIVLNEGIK;AYASNHPIMK;DLSAENGLESLMLR;DLSEFLR;EAAAAGLPGLAR;EFETLIK;ELAAGYR;ELPNFWEQNR;ESLITLIEK;GASSSTNDASDPTTK;GFVLDATDGR;GVHGFVK;GYNPVTK;IVIVPSLNPDGR;KNPAVTQLVDR;LLVPGTYK;LPSLWADNKR;LTAGLGSLIPEGDAGPDAAGPDAAGPLLPGRPQVK;QVHQGVR;QVLIYLAR;SFPDQFSTGEPPALDEVPEVR;SLIQFMK;SPDDAVFQQIALSYSK;SQEGDSISVIGR;SSSNLALALYR;SSTDSNNESK;TSDDEVFK;YIGNMHGNEVVGR;YPPASQLR;YYHEEELESALR
1.24638	1.31517	1.22627	1.21283	1.52288	1.3479	-0.0985975	0.453408	13	13	37.432	O76003	GLRX3	Glutaredoxin-3		ASVMLFMK;AYSNWPTYPQLYVK;ELKENGELLPILR;ELPQVSFVK;GELVGGLDIVK;GTPQEPR;HNIQFSSFDIFSDEEVR;IDRLDGAHAPELTK;LDGAHAPELTK;LEAEGVPEVSEK;LEAEGVPEVSEKYEISSVPTFLFFK;QMVEILHK;YEISSVPTFLFFK
1.82535	1.86115	1.76707	1.76926	1.9607	1.77791	-0.0181023	0.0948902	22	22	54.972	O76021	RSL1D1	Ribosomal L1 domain-containing protein 1		AAESETPGK;AAESETPGKSPEK;ALPASETPK;ATNESEDEIPQLVPIGK;DDVAPESGDTTVK;DEPNSTPEK;FFTTPSK;KALPASETPK;KEQTPEHGK;KTASVLSK;KTPANEK;KVPVSVNLLSK;LLPSLIGR;LLSSFDFFLTDAR;LPEKWESVK;LTLPHSIR;MEDSASASLSSAAATGTSTSTPAAPTAR;SAALPIFSSFVSNWDEATK;SAALPIFSSFVSNWDEATKR;SPNPSTPR;TVSQIISLQTLK;VPVSVNLLSK
1.50892	1.46614	1.50068	1.64243	1.63905	1.56334	-0.123031	1.88054	19	19	100.29	O76024	WFS1	Wolframin		APGPQAGPGPGVR;AQTEVGK;DAAAPAEPQAQHTR;GDMEIPFEEVLER;GITSENER;GVIPSSLFLQDDEDDDELAGK;GVIPSSLFLQDDEDDDELAGKSPEDLPLR;LNATASLEQER;LVSSESK;QGSLIEFSTILEGR;QLSSETDLER;QVAVAELLENVGQVNEHDGGAQPGPVPK;SPEDLPLR;SREEDDVTK;STVHGAVK;SVLLSLR;TLTDLLLR;WPVFELK;YPLHAIMEIK
0.63945	0.627054	0.588154	0.619577	0.723611	0.616119	-0.0348832	0.380693	15	15	69.223	O76031	CLPX	ATP-dependent Clp protease ATP-binding subunit clpX-like, mitochondrial		AAAAADLANR;AQQGIVFLDEVDK;DLIEFGMIPEFVGR;DVGGEGVQQGLLK;EPESAAEAVK;ESSEEEYDSGVEEEGWPR;LLEGTIVNVPEK;LLQDANYNVEK;LPVVVPLHSLDEK;SASEGSSK;SIIKEPESAAEAVK;TLLAQTLAK;TLVQILTEPR;YLGFGTPSNLGK;YVVGQSFAK
-0.740515	-0.718985	-0.748524	-0.7906	-0.504899	-0.695547	-0.0723257	0.356458	7	6	116.45	O76041	NEBL	Nebulette		GFTPVVDDPVTER;GVHPHIVEMDR;KNTQVVSDAAYK;NTQVVSDAAYK;SMQHSPNLR;TGMLPANYIEFVN;YHEDFEK
2.25227	2.2907	2.31873	2.33126	2.39774	2.29215	-0.0531499	0.662615	13	13	46.145	O76054;Q9UDX4	SEC14L2	SEC14-like protein 2		AGEMTEVLPNQR;ENVQDVLPALPNPDDYFLLR;FDNTYSFIHAK;GLLFSASK;HISPDQVPVEYGGTMTDPDGNPK;IMVLGANWK;INYGGDIPR;KIMVLGANWK;KVETITIIYDCEGLGLK;KVNFTVEVLLPDKASEEK;QLGAGTPK;QQYEHSVQISR;VGDLSPR
-2.80789	-2.69417	-3.0648	-2.92478	-3.13709	-2.98154	0.158852	0.555816	3	3	33.248	O76061	STC2	Stanniocalcin-2		EMVSQLQR;SHPNAHAR;VIVEMIHFK
0.396612	0.376625	0.588757	0.763155	0.680802	0.623493	-0.235152	1.39109	7	7	46.405	O76062	TM7SF2	Delta(14)-sterol reductase TM7SF2		APTQGPR;AQVAPVSALAPGGNSGNPIYDFFLGR;KVAEGQELK;LLGPPASLPGLEVLWSPR;VAEGQELK;VAEGQELKDK;VAGLETISTATGR
-1.59337	-1.65845	-1.82911	-1.71158	-1.44599	-1.33351	-0.196614	0.674809	7	6	13.331	O76070	SNCG	Gamma-synuclein		EDLRPSAPQQEGEASK;EGVVGAVEK;EKEEVAEEAQSGGD;ENVVQSVTSVAEK;KEDLRPSAPQQEGEASK;QGVTEAAEK;TVEEAENIAVTSGVVR
-3.51777	-3.33053	-3.49298	-3.55836	-3.25477	-3.49204	-0.0120379	0.0373535	3	3	37.84	O76071	CIAO1	Probable cytosolic iron-sulfur protein assembly protein CIAO1		HVVWHPSQELLASASYDDTVK;SVLSEGHQR;VPAHPDSR
0.210529	-0.058733	-0.0545902	-0.242163	0.117354	0.111288	0.0369088	0.0883249	11	11	99.984	O76074	PDE5A	cGMP-specific 3,5-cyclic phosphodiesterase		DSEGTVSFLSDSEK;ELQSLAAAVVPSAQTLK;FNAEVDQITGYK;GIVGHVAALGEPLNIK;GIVGHVAALGEPLNIKDAYEDPR;GVNNSYIQR;IAELVATEFFDQGDR;IAELVATEFFDQGDRER;ISASEFDRPLRPIVVK;NQFNLEDPHQK;WQALAEQQEK
-3.20935	-3.12593	-3.24227	-3.34058	-2.78639	-3.30991	-0.0468884	0.091216	4	4	39.109	O76075	DFFB	DNA fragmentation factor subunit beta		AEDPPWFEGLESR;ESRILFSTWNLDHIIEK;EVSSYPSTVGAEAQEEFLR;TIIPTLVEAIK
2.65881	2.5763	2.60042	2.6684	2.72915	2.71717	-0.093063	1.41015	24	24	74.605	O76094	SRP72	Signal recognition particle subunit SRP72		AIELLQEFSDQHPENAAEIK;ASGGSGGVSVPALWSEVNR;DIHTLAQLISAYSLVDPEK;DQNVFDSK;EAISDLQQLWK;EALNVINTHTK;ELYGQVLYR;EQGQGDLK;GTQGATAGASSELDASK;HLPSSDSMSLK;ISQGNISK;KQLQAIEFNK;KTNLSAVVAAQSNWEK;LTMAQLK;LTNAEGVEFK;QLQAIEFNK;SPAHLSLIR;TEEALQLYNQIIK;TIESANQQTDK;TIESANQQTDKLK;VDVEALENSAGATYIR;VLANNSLSFEK;VTGDSQPK;VTPDPER
3.7962	3.87089	3.98222	4.00303	4.08601	3.90713	-0.115617	0.705587	20	19	31.121	O94760	DDAH1	N(G),N(G)-dimethylarginine dimethylaminohydrolase 1		AGLGHPAAFGR;ALPESLGQHALR;ATHAVVR;DENATLDGGDVLFTGR;DHMLIPVSMSELEK;DYAVSTVPVADGLHLK;EFFVGLSK;GAEILADTFK;GAEILADTFKDYAVSTVPVADGLHLK;GEEVDVAR;GHVLLHR;IMQQMSDHR;IMQQMSDHRYDK;LKDHMLIPVSMSELEK;LQLNIVEMK;LQLNIVEMKDENATLDGGDVLFTGR;LTVPDDIAANCIYLNIPNK;QHQLYVGVLGSK;SAKGEEVDVAR;TPEEYPESAK
-2.63741	-2.50934	-2.68482	-2.53944	-2.52761	-2.5868	-0.0592368	0.461534	2	2	108.86	O94762	RECQL5	ATP-dependent DNA helicase Q5		AYHAGLK;GSVSASEQGTLNPTAQDPFQLSAPGVSLK
-0.774044	-0.55962	-0.651606	-0.73307	-0.355683	-0.750969	-0.0485156	0.124025	8	8	59.832	O94763	URI1	Unconventional prefoldin RPB5 interactor 1		EVLLEASEETGKR;LLPLSVTPEAFSGTVIEK;MEAPTVETPPDPSPPSAPAPALVPLR;MSDAAGDIVDIR;QAVGLVEHR;TPADIYR;TSDIFEADIANDVK;VEFTEDLQK
0.93722	0.936089	0.951841	0.935863	1.11486	0.91515	-0.0469077	0.299525	10	9	37.121	O94766;REV__Q9BRK4	B3GAT3	Galactosylgalactosylxylosylprotein 3-beta-glucuronosyltransferase 3		AAAEQLR;EGEPGWVHPR;ELFEEMR;FEGPQVQDGR;GGAVGGEKDPPPPGTQGVVYFADDDNTYSR;GHLESSLLSHLVDPK;GVSVWPVGLVGGLR;LSQTLSLVPR;RPPPAPAQPPEPEALPTIYVVTPTYAR;VLVWHTR
-2.17904	-2.37815	-2.35412	-2.28229	-2.29581	-2.2728	-0.0201362	0.115987	1	1	14.669	O94772	LY6H	Lymphocyte antigen 6H		ITDPSSSR
2.89335	2.84221	2.86401	2.83821	2.95699	2.86518	-0.0202665	0.200825	31	26	75.022	O94776	MTA2	Metastasis-associated protein MTA2		AAEADSK;ALTHLEMR;AVGTFAR;DISSSLNSLADSNAR;DITLFHAMDTLQR;DLVAQAPLKPK;EFEEESK;EFEEESKQPGVSEQQR;GHLSRPEAQSLSPYTTSANR;GLGGIMVK;GTTEPHSR;LNPADAPNPVVFVATK;LPLATIVK;LVEGESDNR;LVEGESDNRNQQK;QDFLPWK;QFESLPATHIR;QIDQFLVVAR;QKLNPADAPNPVVFVATK;QPSLHMSAAAASR;QTFLLQTTK;RIEELNK;RPNLPLK;RPYAPINANAIK;SSSQPAAK;TLLADQGEIR;TPTQLEGATR;VGDYVYFENSSSNPYLVR;VKPTLIAVRPPVPLPAPSHPASTNEPIVLED;VWDPDNPLTDR;YQAEIPDR
0.00402832	-0.00129128	-0.0783482	0.0207939	0.041667	-0.0521297	-0.0286474	0.298602	10	7	46.877	O94805	ACTL6B	Actin-like protein 6B		ADFPTTVGLLAAEEGGGLELEGDKEK;AILDHTYSK;DGAEVMSPLK;EGAPPNWK;IFHIDTNALHVPR;IPEGLFDPSNVK;LIASNSTMER;QEYEEGGK;SEPNLHPVLMSEAPWNTR
-1.09481	-1.10138	-0.997463	-0.99999	-0.940005	-1.01351	-0.0800505	0.923849	6	6	23.693	O94811	TPPP	Tubulin polymerization-promoting protein		FAVHGDAR;HAGTYDQK;NVTVTDVDIVFSK;SSEEAVR;TITFEQFQEALEELAK;VDLVDESGYVSGYK
0.663504	0.705215	0.933739	0.861742	0.972014	0.652224	-0.0611741	0.185447	17	16	169.87	O94813	SLIT2	Slit homolog 2 protein;Slit homolog 2 protein N-product;Slit homolog 2 protein C-product		DVTELYLDGNQFTLVPK;EQYFIPGTEDYR;ESYLQIPSAK;GAFQDLK;GDKDHIAVELYR;GHNVAEVQK;GLTEIPTNLPETITEIR;IDLSNNQISELAPDAFQGLR;IPEHIPQYTAELR;LDLSENQIQAIPR;LENVQHK;LLLTTPSK;LLLTTPSKK;LNNNEFTVLEATGIFK;LVSVNFINK;VIPPGAFSPYK;WLADYLHTNPIETSGAR
2.21701	2.17891	2.1591	2.20805	2.27004	2.18109	-0.0347223	0.481462	16	16	65.719	O94819	KBTBD11	Kelch repeat and BTB domain-containing protein 11		AGSRPQSPSGDADAR;AHLLAAALGPAGER;EGEAGGDAGQGGGFEALGAPLDVR;EPAVFGR;GEAQAAGPSGVSVSR;GVLIPFALSLPEKPPR;GVLIPFALSLPEKPPRGEQGAP;LLLADAYSGR;LPGGPTGLQPFR;LQLPGAAQR;MAGVRPDNVAEVVAGAR;QWEAGSAGAASPEELASPEER;RLQLPGAAQR;SADMVALDGFIYR;VQGVSLTALR;WAPVAPLPR
-0.214664	-0.0867405	-0.24332	-0.224426	-0.00102139	-0.163424	-0.0519514	0.250394	15	15	200.55	O94822	LTN1	E3 ubiquitin-protein ligase listerin		AAELLAK;ADTEKDEK;DEITSVLQDHLIK;EATQQAFEK;ETVLENNELEK;FLSTLLDSFSSSR;GVLPYWPR;HALVTPWLK;LLYHLFR;LMPELPQYDQDNLK;LMPENPTYAETAVEVPNKDPK;NFLTSLVAGLSTER;SIDDGELLHGILK;TAHNLENVLIHFWER;VLDDLTK
3.83961	3.81596	3.73351	3.79056	3.90195	3.70703	-0.00348314	0.0178104	24	24	67.454	O94826	TOMM70	Mitochondrial import receptor subunit TOM70		AAAFEQLQK;AASKPVEAAVVAAAVPSSGSGVGGGGTAGPGTGGLPR;ADEMYDK;AIDMFNK;AIEIDNK;ASPAPGSGHPEGPGAHLDMNSLDR;AVELNPK;EIDAEGK;ENSGYLK;EPLMPSPQFIK;GDASGLK;GFEEVIK;GLELISK;GLLQLQWK;KYGLKPPTL;LRPESALAQAQK;NREPLMPSPQFIK;NVDLSTFYQNR;QAYTGNNSSQIQAAMK;QYMEEENYDK;SDEDKDKEGEALEVK;SYFSSFTDDIISQPMLK;YGLKPPTL;YMAEALLLR
1.25875	1.25917	1.2641	1.26964	1.36196	1.26085	-0.0368083	0.495987	12	12	108.19	O94829	IPO13	Importin-13		ALHQLYYDPNIENK;AQLFTQITR;DTFSQQILR;EEQPGAAGAGAAPALDFTVENVEK;GLHGTDYTADY;IAVALGENHSR;LAEEIPNPSNK;LFQAEDSPVDGQGR;REEQPGAAGAGAAPALDFTVENVEK;VVQEDGR;YVNTLLK;YWSDIPTDQYESLK
1.06124	0.992363	0.933411	1.0522	1.06207	0.979939	-0.0357313	0.32551	17	17	81.031	O94830	DDHD2	Phospholipase DDHD2		AQENQQIGR;DLQEIGIPLGPR;EIIILHNPK;EIYQTQGIFLDQPLQ;ETWIPFNSEDSQQLEEAYSSGK;GFFNIYHPFDPVAYR;ILNYFSTR;ITLPSINR;IYTLFLQR;LMVHYQPVAGSDDWGSTPTEQGRPR;LQLSEFFDIFEK;RIDPNYR;RPAPQPASGANIPK;SVSLNLLQTHFK;VVPTDGGR;YAVYWDELASEVR;YDVHLGER
-0.57556	-0.54031	-0.580589	-0.580328	-0.412602	-0.464678	-0.0796169	0.710801	6	6	66.194	O94842;O15405;O94900;Q96NM4	TOX4	TOX high mobility group box family member 4		DVFLAWVASR;GLQLGQTSTATIQPSQQAQIVTR;GQNPNATFGEVSK;INLQQQPPPLQIK;IVASMWDSLGEEQK;SVPLPTLK
0.423031	0.355749	0.251451	0.274244	0.462249	0.317532	-0.00793107	0.035482	12	12	113.01	O94855	SEC24D	Protein transport protein Sec24D		AVLHQPLK;AVTVEFK;EQPEMVFR;GGQVYATNTR;ILFQPQTNVYDSLAK;IPKEEQEETSAIR;KLDPDSIPSPIQVIENDR;LDPDSIPSPIQVIENDR;LFIFHSSLPTAEAPGK;MIMGIIQQK;VGFITYNK;VLHFFNVK
1.01363	1.05275	1.16296	1.08569	1.1271	0.933603	0.0276473	0.138315	20	20	150.02	O94856	NFASC	Neurofascin		AAPYWLDEPK;AYLTVLADQATPTNR;DHIVDPR;DLELTDLAER;DTQISSR;EDDSLTIFGVAER;EVAGDTIIFR;FHFTHTIQQK;GGDLPSDK;GRPDRPR;KEDDSLTIFGVAER;LSPYVNYQFR;LTVSWLK;LTVSWLKDDEPLYIGNR;MPEDQVAR;NLILAPGEDGR;VIAINEVGSSHPSLPSER;VQAENDFGK;YPGSVNSAVLR;YVVGQTPVYVPYEIR
2.98611	3.03269	3.05187	3.0101	3.16402	3.04771	-0.0503887	0.428383	36	35	89.594	O94874	UFL1	E3 UFM1-protein ligase 1		ADAWEEIR;ADAWEEIRR;AQFAEATQR;AVFVPDIYSR;DLQEEVSNLYNNIR;ELQELSSSIK;EMRDELHVR;EYITPAQISK;FFADDTQAALTK;GLFSAITRPTAVNSLISK;GVIFTEAFVAR;HIQDAPEEFISELAEYLIKPLNK;HVQLVLGQLIDENYLDR;IISGHIDLDNR;IPEDQHALLVK;KATEGSGSMR;KELQELSSSIK;KTGQGDYPLNNELDKEQEDVASTTR;LAADFQR;LAEEVNDK;LGIPDAVSYIK;LHNSLNEK;NNPVHLITEEDLK;QASTVVFSDTVVVSEK;QILFQHR;QISTLESVSTSK;QLEVVHTLDGK;QLVSQSK;SVFMSSTTSASGTGR;TIKDLQEEVSNLYNNIR;TQSTWVDSF…
2.06252	2.07273	2.12105	2.14614	2.36771	2.17656	-0.144704	0.944695	24	24	124.11	O94875	SORBS2	Sorbin and SH3 domain-containing protein 2		APHYPGIGPVDESGIPTAIR;AQPARPPPPAQPGEIGEAIAK;ESDVIDVMEK;FFGTFPGNYVK;GAEDYPDPPIPHSYSSDR;GLGDQSASR;HDWDPPDRK;KGDTVYILR;KIDQNWYEGEHHGR;KSEPAVGPPR;LAFLVSPVPFR;LISELLPDVPER;QGIFPVSYVEVVK;QGIFPVSYVEVVKK;RVDQNWYEGK;SFTSSSPSSPSR;SHSDNSPNAFK;SIFEYEPGK;SLERPMSSASMASDFR;SSILQHERPASLYQSSIDR;SYSSTLTDMGR;TTVDRPK;VDLPGSSTTLTK;VGIFPISYVEK
-1.25648	-1.33208	-1.34772	-1.27883	-1.12705	-1.20546	-0.108317	0.974193	9	7	72.082	O94876	TMCC1	Transmembrane and coiled-coil domains protein 1		AAIAHLQQK;DDNVAEYLK;DMHQGLK;DYSLIMQTLQEER;IAYQSYER;LEESFETLK;QELASMEEK;SAQTILQLQK;VTGFSEGVVDSVK
0.340261	0.363468	0.351097	0.346674	0.487494	0.383526	-0.0542892	0.564783	10	10	106.99	O94880	PHF14	PHD finger protein 14		GTGDNENLVR;KAELMGISTDIFPVDNSDTSSSVDGR;LHVEYNK;LNIPAILR;NSAEEEVLSSEK;QLSPEAQAR;QPALTADFVNYYFER;SEGQGIWALLGR;SNEDSLILEK;STRPQAWVPR
-0.790068	-0.752537	-0.813187	-0.820257	-0.607955	-0.831623	-0.0319853	0.160429	9	9	136.65	O94885;Q9NSI8	SASH1	SAM and SH3 domain-containing protein 1		AQPLEQDSAVDNALLLTQSK;AVLLTAVELLQEYDSNSDQSGSQEK;FIYVDVLSEDEEKPK;GVDLETLTENK;LHAEGIDLTEEPYSDK;LKEYEAQHR;LLEEEDLDELNIRDPEHR;SVEDLLDR;VHTDFTPSPYDTDSLK
-2.13166	-2.06689	-2.20237	-2.22493	-1.73099	-2.00297	-0.147346	0.424735	3	3	92.125	O94886	TMEM63A	CSC1-like protein 1		ETVESHFR;KETVESHFR;TLFITGLPR
-1.86133	-1.83198	-1.79776	-1.86798	-1.50331	-1.84275	-0.0923408	0.317757	14	14	119.89	O94887	FARP2	FERM, ARHGEF and pleckstrin domain-containing protein 2		ADHSAAVENQLSGYLLR;AITEVTTTLQHILIR;APSIVQDGPQPSSGLEGMVR;DLVGIENLIAPGR;DSSSSLTDPQVSYVK;GVAGTSHFR;HVGQTPAESDFQVLEIAR;ILEFHQK;IQLAVSHMGVLVFQGTTK;LALWEGPSK;LGAQTPVGVSTLEPGQTLLPR;LHPEVHGPYQDTLEFLLGSR;LLDNTMEIFDIEPK;VPADEAYFIVK
2.35555	2.36873	2.21286	2.28458	2.50189	2.34496	-0.0647682	0.325511	17	16	54.862	O94888	UBXN7	UBX domain-containing protein 7		ADGVVEGIDVNGPK;APIPQKQEILVEPEPLFGAPK;ASLQETHFDSTQTK;DFQTETIR;DVWSNEAVK;EHFIFWQVYHDSEEGQR;EQITLPEQAK;FELLTNFPR;GLIQQFTTITGASESVGK;GSFETAK;LGDFPYVSILDPR;LTTLADLFRPPIDLMHK;QEILVEPEPLFGAPK;RPLTEPPVR;SESLIDASEDSQLEAAIR;SIFDGFR
-6.20501	-6.13105	-6.15864	-6.08862	-5.26914	-5.84937	-0.429189	0.813269	3	3	118.96	O94898	LRIG2	Leucine-rich repeats and immunoglobulin-like domains protein 2		GTDGGTGTR;IVEGLTFQGLDSLR;LPHLQFLELK
2.17299	2.17061	2.14763	2.16228	2.38138	2.16253	-0.0716556	0.415156	22	22	87.109	O94901	SUN1	SUN domain-containing protein 1		AIVNSALK;DAVGQPPR;DLQLQILR;DVLTAHPAAPGPVSR;EKSEAIQK;ELTTLLQK;EQTTVDHFWGLDDDGDLK;ETDFMAFHQEHEVR;FSSQFVSK;GDLQTMLR;GSQGYLVVR;KDVLTAHPAAPGPVSR;LLFSEDQQGGSLEQLLQR;MSHLEDILGK;QLPTSEAVVSAVSEAGASGITEAQAR;RPDDTAFQIVELR;RPPVLDESWIR;TISAVGEQLLPTVEHLQLELDQLK;TLSPTGNISSAPK;VDDPQDVFKPTTSR;VDQMEGGAAGPSASVR;VHGEPVK
1.23588	1.18397	1.15827	1.20695	1.4389	1.3371	-0.134948	0.88693	8	8	30.344	O94903	PLPBP	Pyridoxal phosphate homeostasis protein		APLEVAQEH;DLPAIQPR;HGLPPSETIAIVEHINAK;LMAVPNLFMLETVDSVK;TFGENYVQELLEK;TKPADMVIEAYGHGQR;VQQAVAR;WHFIGHLQK
3.38781	3.34292	3.39356	3.48807	3.5114	3.43258	-0.102588	1.65081	25	18	37.839	O94905	ERLIN2	Erlin-2		AIASNSK;ALIEAEK;DIPNMFMDSAGSVSK;EAETERK;IEEGHIGVYYR;IEVVNFLVPNAVYDIVK;ISEIEDAAFLAR;KALIEAEK;KISEIEDAAFLAR;LALQQDLTSMAPGLVIQAVR;LLIAAQK;LSFGLEDEPLETATK;LSFGLEDEPLETATKEN;LTPEYLQLMK;NYELMESEK;QFEGLADK;QFEGLADKLSFGLEDEPLETATK;QFEGLADKLSFGLEDEPLETATKEN;SVQTTLQTDEVK;TKLLIAAQKQK;VAQVAEITYGQK;VMEKETEK;VTKPNIPEAIR;VTKPNIPEAIRR;VVEKEAETER
3.45513	3.45493	3.41833	3.43634	3.58704	3.44008	-0.045022	0.368434	37	37	106.92	O94906	PRPF6	Pre-mRNA-processing factor 6		AAELETDIR;AAVELEEPEDAR;AEVLWLMGAK;AIYAYALQVFPSK;AIYAYALQVFPSKK;ALEHVPNSVR;AVIGIGIEEEDRK;AVVAQAVR;DANDPVDDR;DIANWQK;EAYNQGLK;EAYNQGLKK;ENIPTDR;ESLEALLQR;ETNPHHPPAWIASAR;FELQHGTEEQQEEVR;GQIEEQK;GYLTDLNSMIPTHGGDINDIK;GYLTDLNSMIPTHGGDINDIKK;HIWITAAK;HLPQSVR;HYEDFPK;IDSDLGDAWAFFYK;IQQQFSDLKR;KALEHVPNSVR;KLAEVTEEEWLSIPEVGDAR;LAEVTEEEWLSIPEVGDAR;LESENDEYER;LEWVQDNIR;LQPGDTAK;LSQVSDSVSGQTVVDPK;LTPVPDSFFA…
-1.87551	-1.95749	-2.05161	-2.06845	-1.93935	-2.01422	0.0457996	0.29369	2	2	162.71	O94910	ADGRL1	Adhesion G protein-coupled receptor L1		GSIYAGDVSSSVK;LVVSQLNPYTLR
-2.35674	-2.53974	-2.55103	-2.61495	-2.36556	-2.67376	0.0689179	0.239127	4	4	183.67	O94911	ABCA8	ABC-type organic anion transporter ABCA8		LPVEDVQPLAQAFFK;LVEMEQVLSSLNK;NLAQVEPLHAEILR;VITGDTKPTAGQVLLK
-2.05123	-1.83123	-1.91819	-1.95149	-1.80561	-1.86161	-0.0606445	0.32432	9	9	173.05	O94913	PCF11	Pre-mRNA cleavage complex 2 protein Pcf11		APHQVPVQSEK;EIVSLIEAQTAK;ENVENWQSSK;LASGEITQDDFLVVVHQIR;LPVMYLMDSIVK;LTALAEDRPLFDGPSRPSVAR;SPEEPSTPGTVVSSPSISTPPIVPDIQK;VHEEVVLK;YEDSDKPFVDSPASR
3.24505	3.34836	3.27674	3.28857	3.42931	3.08391	0.0227823	0.0764503	42	39	339.59	O94915	FRYL	Protein furry homolog-like		AIANVFQNR;ALDSILR;ALFALLEIPK;ALKQPLTATTLSDVLSR;AYPELTLAIFSEISQR;DGEPPMPTTGVILPSGNTLR;EAESASENEEIDISK;EFISAVAQVK;EIIFDLLSVGK;EKIENVQSK;ELIEELHPIIK;EVTDVHPTLLDNAVK;FGEITNEAVSFLGDSLQR;GPLWNHEDVSAK;HVVSVFK;IIGIPSPSSLFK;IIQFIAQER;INHSSSLAR;KALDSILR;KFVTELK;KIEVVMAEPLEK;KVNTTTSSDSYIGLWR;LLIHLPLDK;LPEDTTSVLK;LQLLSPQVDINSPINAK;QLLEAENEKDSDTLK;QPLTATTLSDVLSR;RHDEDEDDSLKDR;RPQLSQR;SAEQLTTFLK;SASLVVPSDIPK;S…
-2.84654	-2.77479	-2.79764	-2.76377	-2.69385	-2.89013	-0.0237373	0.143917	5	5	165.76	O94916	NFAT5	Nuclear factor of activated T-cells 5		APHYVLSQLTTDNK;GEEEVFLIGK;IVVQPETQHR;LEGHNEPVVLQVFVGNDSGR;VIFQENVSDENSWK
-0.597876	-0.537663	-0.507032	-0.58737	-0.172687	-0.464903	-0.139204	0.480455	8	8	55.016	O94919	ENDOD1	Endonuclease domain-containing 1 protein		APRPAPGGAEQR;DRIPVYSAFR;DSDIIEDVMVK;ILEVVNQIQDEER;QALNTDYLDSDYQR;SSSPLSSTR;VTFDNSGEL;WYVNLHSLMDR
-1.95216	-1.84256	-1.80723	-1.86459	-1.45113	-1.74089	-0.181783	0.629412	5	5	70.1	O94923	GLCE	D-glucuronyl C5-epimerase		AMLPLYDTGSGTIYDLR;APPVVGGFNSNVGSK;DHIFLNSALR;EGNEVFLPFTWVEK;SLEPGWYSAMAQGQAISTLVR
1.52551	1.41723	1.45964	1.48145	1.63119	1.46435	-0.0582018	0.399477	12	12	73.46	O94925	GLS	Glutaminase kidney isoform, mitochondrial;Glutaminase kidney isoform, mitochondrial 68 kDa chain;Glutaminase kidney isoform, mitochondrial 65 kDa chain		DGPGETDAFGNSEGK;ELVASGENK;FDYVMQFLNK;HSTGDTK;LTLQTTSDGVMLDKDLFK;MAGNEYVGFSNATFQSER;QGVNNAEK;TALHVAAAEGHVEVVK;VADYIPQLAK;VLSPEAVR;YAIAVNDLGTEYVHR;YVGKEPSGLR
0.673639	0.511524	0.523241	0.667168	0.557908	0.708958	-0.0752096	0.472909	5	5	77.801	O94929	ABLIM3	Actin-binding LIM protein 3		DFITGEVISALGR;IYPYELLLVTTR;KPFPIGDK;SHYLADSDPLISK;VLEAGGK
-1.01343	-1.21344	-1.11867	-1.04208	-0.927764	-1.01663	-0.119686	0.823205	6	6	72.269	O94952	FBXO21	F-box only protein 21		EGIDQSYQLLR;KIVASFSK;KKEEVGVEVK;QLGVPLEPVNFPSHFLLR;YAAQENLEYNVEPQEISHPDVGR;YPEDLEFVYETVQNIYSAK
0.349796	0.377659	0.386856	0.411379	0.568454	0.388844	-0.0847883	0.667861	16	16	121.9	O94953	KDM4B	Lysine-specific demethylase 4B		AASFQAER;AGEGQAPSTFSK;AVSLGQVVITK;DLTVLDHTRPTALTSPELSSWSASR;EAEGAEEDGRGK;EEAGPEVDPEEEEEEPQPLPHGR;EPVSPMELTGPEDGAASSGAGR;GDIFTLEEELPK;HPVDISAIPEQR;HQDFDDLER;LSLSTGAPQEPAFSGEEAK;MTLISPIILK;QTYDDIDDVVIPAPIQQVVTGQSGLFTQYNIQK;RGDIFTLEEELPK;SGGHAVQLLR;VGTPLATEDSGR
-5.88485	-5.88853	-5.95429	-5.91424	-5.22301	-5.77343	-0.27233	0.571094	3	3	69.413	O94955	RHOBTB3	Rho-related BTB domain-containing protein 3		ALNSVPVIIAAVGTR;ELASMNLDIVDLLK;SPTDIQDSSIIR
-3.72352	-3.61737	-3.70525	-3.68463	-3.40878	-3.6193	-0.111144	0.549938	7	4	183.86	O94964	MTCL2	Microtubule cross-linking factor 2;N-terminal form;C-terminal 80 kDa form		HLQFVEEEAELLR;HLQFVEEEAELLRR;IVELEVENR;LIHAILVR;LSVLQQELNAFTR;LVEEEANLLSR;QVLQTELERPR
-1.70973	-1.609	-1.49706	-1.55844	-1.51448	-1.71862	-0.00808112	0.0311928	11	11	145.65	O94966	USP19	Ubiquitin carboxyl-terminal hydrolase 19		GPVPSTSGISSEMLASGPIEVGSLPAGER;IQNKPYTETVDSDGRPDEVVAEEAWQR;LFDDSTVTTVDESQVVTR;LFFPSSSGSASTPQEEQTK;LPNVLIVQLK;LQEFVLVASK;RGPPGLEDTTSK;VAVPTGPTPLDSTPPGGAPHPLTGQEEAR;VLPVFYFAR;VVVLEVQQRPQVPSVPISK;YSVSVFQPPFQPGR
1.60267	1.57418	1.56969	1.63702	1.6653	1.64389	-0.0665566	2.11681	16	16	101.95	O94967	WDR47	WD repeat-containing protein 47		AAYADLLTPLISK;AVAFHPAGGLYAVGSNSK;DSTEQFQEYYR;DWNPSTAR;KLSEAGFK;LFQLVMK;LILDFLNSK;LSEAGFK;LTHDASNIHTSTPR;LTNHAEFK;MLNIHVDK;RPQSADAYMTR;TAEETVNVK;VTDLQGDLTK;WHTQDLSFLSSSADR;YQQHLEQK
-7.22841	-6.72454	-6.6784	-6.53375	-5.94229	-6.76397	-0.463781	0.70149	1	1	107.9	O94972	TRIM37	E3 ubiquitin-protein ligase TRIM37		ALDSDAVVVAVFSGLPAVEK
2.43282	2.44802	2.45346	2.45607	2.56356	2.45157	-0.0456336	0.543186	33	20	103.96	O94973	AP2A2	AP-2 complex subunit alpha-2		AKHPMDTEVTK;ALDGYSK;ALLLSTYIK;DDVQGYAAK;EMAEAFAGEIPK;ESSILAK;FFQPTEMASQDFFQR;FVNLFPEVKPTIQDVLR;GLAVFISDIR;GPSTVTDLEDTK;GPSTVTDLEDTKR;HPMDTEVTK;IAGDYVSEEVWYR;IIGFGSALLEEVDPNPANFVGAGIIHTK;INKELANIR;KGPSTVTDLEDTK;KGPSTVTDLEDTKR;KVQHSNAK;LEPNLQAQMYR;LINNAIK;LSTVASTDILATVLEEMPPFPER;LTECLETILNK;MFIFYGNK;NADVELQQR;QLSNPQQEVQNIFK;SSPLIQFHLLHSK;THIETVINALK;TSPDLVPMGDWTSR;VAILAEK;VGGYILGEFGNLIAGDPR;VLVAGDT…
3.57716	3.5402	3.50224	3.54672	3.63835	3.56184	-0.0424388	0.523078	36	36	133.01	O94979;Q9NQW1	SEC31A	Protein transport protein Sec31A		AQDGSHPLSLQDLIEK;AQGEPVAGHESPK;ATVWDLR;ATVWDLRK;AVQLTQAMDTSTVGVLLAAK;EQTLSPTITSGLHNIAR;EVVIAQNDK;FASSPLR;GDVSGVLIAGGENGNIILYDPSK;GRPGPVAGHHQMPR;IDASQTEFEK;IIAGDKEVVIAQNDK;IIAGDKEVVIAQNDKHTGPVR;ISVYSIMGGSTDGLR;KAVQLTQAMDTSTVGVLLAAK;KIALALNK;KIDASQTEFEK;KPIPDEHLILK;LEFLYDK;LITAVVMK;LIWGPYK;LVTFENVR;MADAIILAIAGGQELLAR;MPSHQGAEQQQQQHHVFISQVVTEK;NPAVLSAASFDGR;NVWSFLK;QVQHILASASPSGR;RLEFLYDK;RPVGASFSFG…
2.38034	2.3552	2.23492	2.33875	2.45255	2.38498	-0.0686083	0.54409	15	15	109.79	O94985	CLSTN1	Calsyntenin-1;Soluble Alc-alpha;CTF1-alpha		AASEFESSEGVFLFPELR;AMQHISYLNSR;ATEDVLVK;ATVHIQVNDVNEYAPVFK;ATVIEGK;EGLDLQVLEDSGR;GNLAGLTLR;GPDGTNVK;GVQIQAHPSQLVLTLEGEDLGELDK;IHGQNVPFDAVVVDK;IPDGVVSVSPK;ISLSGVHHFAR;QFPTPGIR;YISNEFK;YRPAEFHWK
-3.76887	-3.71175	-3.68879	-3.70703	-3.41937	-3.59867	-0.148112	0.783554	3	3	107.48	O94991;Q9H5Y7	SLITRK5	SLIT and NTRK-like protein 5		FVPLTHLDLR;LNVEPDYLEVLEK;RTDFLEATGLDLLHLGNNR
0.602367	0.50099	0.424158	0.46792	0.590245	0.502821	-0.011157	0.0613147	7	6	40.623	O94992	HEXIM1	Protein HEXIM1		AENLQLLTENELHR;DFSETYER;ELELELDR;EYLELEK;GQPVAPYNTTQFLMDDHDQEEPDLK;LGAPAAGGEEEWGQQQR;VPEEDSR
-3.76632	-3.58314	-3.86377	-3.82086	-3.59118	-3.96776	0.0555226	0.151159	5	5	89.65	O95025	SEMA3D	Semaphorin-3D		AEHEEGK;AQEHTFIHTIVK;DFPDDVISFIK;SGDEHREELKPDER;SVYPVAGGPTFK
-2.4501	-2.44369	-2.34836	-2.51217	-2.36779	-2.3478	-0.00479603	0.0262073	6	5	22.329	O95057	DIRAS1	GTP-binding protein Di-Ras1		DTYIPTIEDTYR;EAQAVAQEWK;ELFQELLTLETR;GSVEDIPVMLVGNK;PEQSNDYR;VVVFGAGGVGK
-1.25375	-1.25124	-1.21301	-1.05035	-0.96684	-1.15165	-0.183056	1.53451	3	3	32.011	O95070	YIF1A	Protein YIF1A		AYHSGYGAHGSK;LGLLVFPYTHQNWEVQYSR;YFFAVDTAYVAK
0.189875	0.194876	0.158566	0.18964	0.310229	0.189566	-0.0487064	0.510732	29	29	309.35	O95071	UBR5	E3 ubiquitin-protein ligase UBR5		AASTAPSSTSTPAASSAGLIYIDPSNLR;AEQENNFPTSSIAFLGQNER;ANAHFILK;ATFLGLTNEK;ATVATENNK;AYPAAITILETAQK;DLSLEVDRDR;EGEPNLDKK;ENGADSILDLGLVDSSEK;EVVFVEDVK;GLLDVLPK;GVHAVLK;IGHLLPEEQVYLNQQSGTIR;LEHTAQTYSELQGER;LELGKPDNNDGSK;LLTATNLVTLPNSR;LSLELFGR;LTYQDAVNLQNYVEEK;LYVPLYSSK;NVAIFTAGQESPIILR;QISDLMGLIPK;TSIHFVVHPLPGTEDQLNDR;VATWVDETLSSVASK;VDEAMELIIAHGR;VLLLPLER;VLQDWNALK;VQAMQPAFASK;VTFKDEPGEGSGVAR;YNHLVYSQ…
-3.50811	-3.40587	-3.60484	-3.62209	-3.33575	-3.66817	0.0357291	0.1087	4	4	34.767	O95073	FSBP	Fibrinogen silencer-binding protein		EEHQIILENQK;HSVIVEK;ILEEHTNK;LVKPYVK
0.993832	1.03149	0.96903	1.23499	1.06531	0.792816	-0.0329192	0.0900894	6	6	43.001	O95084	PRSS23	Serine protease 23		DFLLNYPFSTSVK;GNANDIGMDYDYALLELK;IGVSPPAK;IHFSGYDNDRPGNLVYR;LPVVLPQSTLNLAKPDFGAEAK;VGFLKPK
0.28454	0.316906	0.303293	0.240713	0.533046	0.356218	-0.0750793	0.366966	13	10	125.87	O95104	SCAF4	SR-related and CTD-associated factor 4		AAFPPPEQK;DLSIGNPIPTVVSGAR;GNAESGDSVK;GVSEAAVLKPSEELPAEATSSVEPEKDSGSAAEAPR;HQFGTDKDVFGPR;HVVQIVEK;IAWALNK;LLDRFDYDDEPEAVEESKK;QQFNSGR;TTPTQPSEQK;TVEPPISQVGNVDTASELEK;VLNLWQK;VPGLYVIDSIVR
0.765282	0.80842	0.742172	0.843655	1.05225	0.62627	-0.0687672	0.214581	9	9	15.489	O95139	NDUFB6	NADH dehydrogenase [ubiquinone] 1 beta subcomplex subunit 6		DQELSPR;EFPDQHH;EPVLPPQK;IFPGDTILETGEVIPPMK;IFPGDTILETGEVIPPMKEFPDQHH;MVHGVYK;TGYTPDEK;WLKDQELSPR;YHVSEKPYGIVEK
0.876442	0.902727	0.910566	0.893829	1.11393	0.866035	-0.0613546	0.317678	16	15	86.401	O95140	MFN2	Mitofusin-2		AQGMPEGGGALAEGFQVR;ENLEQEIAAMNK;HIEEGLGR;IEVLDSLQSK;IFFVSAK;KIEVLDSLQSK;LIMDSLHMAAR;NAELDPVTTEEQVLDVK;QITEEVER;QLELLAQDYK;QVSTAMAEEIRR;SQIDMLVPR;STVINAMLWDK;TVNQLAHALHQDK;VEGTDGHEAFLLTEGSEEK;VEGTDGHEAFLLTEGSEEKR
-3.34821	-3.42636	-3.48397	-3.46157	-3.30293	-3.62992	0.0452967	0.167014	2	2	41.142	O95149	SNUPN	Snurportin-1		GSTSAYTK;LPEEEGLGEK
0.63855	0.697613	0.804964	0.726233	0.811996	0.636185	-0.0110954	0.0543745	19	19	146.18	O95155	UBE4B	Ubiquitin conjugation factor E4 B		DENPFASLTATSQPIAAAAR;DLKVENPEK;ELFEEVISK;FFEMIENHPLSTK;FYTDVEHTGATSEFYDK;IHEVQEEMK;IKLETVDPTYIFHPR;ILDPAYPDITLPLNSDVPK;ITLPNDETR;LAGGQTSQPTTPLTSPQR;LETVDPTYIFHPR;LLVPSLMK;MEELSADEIRR;NLPYGFIQELVR;QTLTESMLEPVPELK;QVQKPFLRPELGPR;TTHQDEEVFK;VVSQSLQHYLELGR;YFSGPAITLENTR
-1.24775	-1.33123	-1.38492	-1.2799	-1.19925	-1.22346	-0.0870949	0.871415	2	2	34.114	O95159	ZFPL1	Zinc finger protein-like 1		AAADSDPNLDPLMNPHIR;LATVNWAR
1.8922	1.90053	1.83647	1.86292	2.02814	1.92339	-0.0617501	0.518549	33	33	150.25	O95163	ELP1	Elongator complex protein 1		AFEDTLQLMER;AIGHLSK;ALVLAQIR;DFEPILEQQIHQDDFGESK;DKNLYNEALK;DQLVGLGR;EESSIPK;ETQFHGSEGR;EVKNEVSLVAEGFLPEDGSGR;EYLPFLNTLK;EYLPFLNTLKK;FITVGWGR;GNLEVVHHR;INLNLIYDHNPK;IQFENNEDQDVNPLK;IVTVVPQDTK;KTTPELEIVLQK;LDIIETNVKPSILEAQK;LGAVGGSGFK;LVLQMPR;NEVSLVAEGFLPEDGSGR;NLYNEALK;QIDSVNHINLFFTELKEEDVTK;SNDLAVLDASNQISVYK;SVGDNSSDLSNVAVIDGNR;SVVLQLADGQIFK;TMYPAPVTSSVYLSR;TSVPVLDAELFIPPK;TTPELEIVLQK;VFLGNVETFI…
-2.06156	-1.96909	-1.88484	-2.05827	-1.78946	-2.07339	0.00187842	0.0058435	2	2	13.157	O95164	UBL3	Ubiquitin-like protein 3		EFLFSPNDSASDIAK;LILVSGK
-1.79973	-2.0382	-2.1793	-2.15814	-1.79612	-2.07274	0.00326061	0.0068798	5	2	13.918	O95166	GABARAP	Gamma-aminobutyric acid receptor-associated protein		EEHPFEK;FVYKEEHPFEK;KYPDRVPVIVEK;VPVIVEK;YPDRVPVIVEK
1.06363	0.996872	1.0373	1.06653	1.1379	1.14664	-0.0844227	1.2408	6	6	15.208	O95168	NDUFB4	NADH dehydrogenase [ubiquinone] 1 beta subcomplex subunit 4		EYLLQYNDPNR;EYLLQYNDPNRR;GLIENPALLR;TINVYPNFRPTPK;TLPETLDPAEYNISPETR;YKPSSLR
-3.92098	-3.9457	-3.98567	-3.9413	-3.57634	-4.02274	-0.103992	0.30572	3	3	21.766	O95169	NDUFB8	NADH dehydrogenase [ubiquinone] 1 beta subcomplex subunit 8, mitochondrial		DPWYSWDQPGLR;QYPYNNLYLER;VEDYEPYPDDGMGYGDYPK
1.06339	1.00427	1.00957	0.962532	1.13645	1.06763	-0.0297893	0.214374	7	7	12.551	O95182	NDUFA7	NADH dehydrogenase [ubiquinone] 1 alpha subcomplex subunit 7		ALVSGKPAESSAVAATEK;AVTPAPPIK;ESVPPSIIMSSQK;KAVTPAPPIKR;LPVGPSHK;NWASGHDLQGK;WELSSDQPYL
0.401718	0.495605	0.453743	0.532051	0.899213	0.587986	-0.222728	0.883875	9	9	112.61	O95197	RTN3	Reticulon-3		AEPSAATQSHSISSSSFGAEPSAPGGGGSPGACPALGTK;DAELPSEEVLK;HIDDSSPEDLIAAFTETR;IQAEKPVSIPSAVVK;QDDTLAELPGSPPEK;SEEGHPFK;TQIDHYVGIAR;VSGDDVIEKDSPESPFEVIIDK;YKTQIDHYVGIAR
1.96261	1.97101	1.96832	1.97309	2.12782	1.92784	-0.0422678	0.280772	22	22	83.353	O95202	LETM1	Mitochondrial proton/calcium exchanger protein		ADDKLIAEEGVDSLNVK;AKLEATLQEEAAIQQEHR;ALGVTEDR;AMYLPDTLSPADQLK;DDSVVEK;DFSVFFQK;EKEELELLK;ETGERPSNEEIMR;FLQDTIEEMALK;KLEEGGPVYSPPAEVVVK;LEATLQEEAAIQQEHR;LEEGGPVYSPPAEVVVK;LFPNMLPSTFETQSLKEER;LIAEEGVDSLNVK;LLELQSIGTNNFLR;LLWIDTK;LTSLAAALDENK;LTSLAAALDENKDGK;LTSLAAALDENKDGKVNIDDLVK;STLQTLPEIVAK;VAEVEGEQVDNK;VNIDDLVK
-0.417313	-0.430347	-0.292847	-0.29752	-0.261502	-0.227526	-0.117986	1.14977	7	7	68.481	O95208	EPN2	Epsin-2		DGKDQGINVR;ENIFAIQTLK;EVAEQEER;MTTSSIR;NIVNNYSEAEIK;QLVALLK;QLVALLKDEER
1.92293	1.82949	1.70781	1.81042	1.84472	1.87147	-0.0221243	0.12509	9	9	37.404	O95218	ZRANB2	Zinc finger Ran-binding domain-containing protein 2		AGGTEIGK;AVGPASILK;ENVEYIEREESDGEYDEFGR;EVEDKESEGEEEDEDEDLSK;LDEDEDEDDADLSK;TGYGGGFNER;VSDGDWICPDKK;YKLDEDEDEDDADLSK;YNLDASEEEDSNK
-0.281307	-0.33243	-0.280394	-0.310368	-0.116767	-0.244968	-0.0740093	0.551613	6	6	51.908	O95219	SNX4	Sorting nexin-4		AEFVWHK;ETVNETGFQLK;IGLENFLLR;LFGQETPEQR;VFSEWSAIEK;VLEEQINEGEQQLK
2.1595	2.15405	2.1116	2.13551	2.30839	2.15069	-0.0564763	0.420027	17	16	51.466	O95232	LUC7L3	Luc7-like protein 3		ATVEELKEK;EKQSEDTNTESK;IDVLLQQIEELGSEGK;IHDENLR;IHDENLRK;IQVLTDK;LALSQNQQSSGAAGPTGK;LVEQLKEER;MISAAQLLDELMGR;NLAPDEK;QHMGYAK;RREEEER;RTEEPDRDER;STTSTIESFAAQEK;TEEPDRDER;VDDHLMGK;YLQSLLAEVER
2.22812	2.2311	2.18502	2.19334	2.35962	2.17184	-0.0268545	0.165359	43	40	208.44	O95248	SBF1	Myotubularin-related protein 5		AAFLGQR;AALYILGDK;ADENHPQR;ALYLEPTEDLAPAQEVGEAPSQEDER;AQNAPSPGQSQADSSSLEQEK;AQPDAISR;AVLDHQQFDFVVR;EESTVFSQAIHYANR;EWLSFGHR;GLVEDDFLMK;GQPPPEDQEDEISVSEELEPSTLTPSSALKPSDR;GSGEGQGQILQR;GVIDLAEVEAVAPGTPTMGAPK;GVPYRPTDLFDELVAHEVAR;GVVGLFK;HVQELAEQLYK;IELGLLYEEK;IHPEPVIR;ISVQTPVDQLLQDGLQLR;KLLPAVLR;LDEGTVQWIVDQAAAK;LDHTEVFR;LEGRPDGR;LETELGQPAER;LGLGTLSSSLSR;LLPAVLR;MAFDEEVGSDSAELFR;MSYLLLPLDSSK;QVIQTP…
-0.18222	-0.137724	-0.0767136	-0.147375	0.0636778	-0.12491	-0.0626834	0.354328	7	7	28.612	O95249	GOSR1	Golgi SNAP receptor complex member 1		AAGTSSYWEDLRK;DILQDYTHEFHK;FPAVNSLIQR;LIEETISIAMATK;LTGVNDK;QLENELDLK;RTELFLK
0.237968	0.211376	0.136244	0.217966	0.376271	0.235395	-0.0813481	0.623966	11	11	70.642	O95251	KAT7	Histone acetyltransferase KAT7		ASEDLEK;EISQETAVNPVDIVSTLQALQMLK;EPLLENLTSEYDLDLFR;HPPGDEIYR;HQAPTER;MLIDFSYLLSK;RQDLIDEWIAK;SQQQPTPVTPK;VGSPERPLSDLGLISYR;YELDTWYHSPYPEEYAR;YLHNFQGK
-2.23163	-2.21299	-2.27522	-2.31342	-1.92236	-2.28732	-0.0655788	0.197708	3	3	36.201	O95258	SLC25A14	Brain mitochondrial carrier protein 1		AIVGHVDLYK;GTVDGILK;GVVPTAQR
0.772266	0.745996	0.726259	0.665436	0.922053	0.669516	-0.00416088	0.0160618	16	16	59.09	O95260	ATE1	Arginyl-tRNA--protein transferase 1		AFWAGGSPSVVDYFPSEDFYR;AIMPYGVYK;ATLLESYQVYK;DPSEEAAVLQYASLVGQK;EEPQELLQSQDFVGEK;FNQDPEAVDEDR;FNQDPEAVDEDRSTEPDR;KEEPQELLQSQDFVGEK;LGSGEPSHSVK;LMQQNPAGELEGFQAQGHPPSLFPPK;NPPDTPTESQFTR;QQKDPSEEAAVLQYASLVGQK;SLEDLIFESLPENASHK;SSPPSSQFK;STEPDRLQVFHK;TLSDDIKESLESEGK
-3.56018	-3.58561	-3.2049	-3.53356	-3.58665	-3.73727	0.168926	0.544136	4	4	90.401	O95267	RASGRP1	RAS guanyl-releasing protein 1		ATQTESQPWIGSEGPSGPFVLSSPR;IVISSAELLQK;LPTYQELEQEINTLK;VLGEMTELLSSSR
2.76267	2.66336	2.73162	2.80764	2.81771	2.83652	-0.101406	1.53274	11	10	27.228	O95292	VAPB	Vesicle-associated membrane protein-associated protein B/C		EAKPEDLMDSK;FRGPFTDVVTTNLK;GPFTDVVTTNLK;IISTTASK;LGNPTDR;LQGEVQR;SLSSSLDDTEVK;SLSSSLDDTEVKK;TETPIVSK;TVQSNSPISALAPTGK;VEQVLSLEPQHELK
-3.96094	-3.93878	-3.75032	-3.64496	-3.66516	-3.75827	-0.193885	1.20866	3	3	90.015	O95294	RASAL1	RasGAP-activating-like protein 1		AVQSIGNLGQQLGQGK;FFAPAILTPK;LLEVLADLDR
-1.19506	-1.18631	-1.21927	-1.21695	-1.14439	-1.18093	-0.0194585	0.348801	6	6	14.874	O95295	SNAPIN	SNARE-associated protein Snapin		AGAGSAAVSGAGTPVAGPTGR;AMLDSGIYPPGSPGK;LNHSVAK;RLNHSVAK;VALDLDPYVK;VVLVNNILQNAQER
0.59816	0.573277	0.583126	0.720797	0.84142	0.756094	-0.187916	2.16934	5	5	29.082	O95297	MPZL1	Myelin protein zero-like protein 1		ISWAGDLDK;ISWAGDLDKK;KSPSDTEGLVK;NPPDIVVQPGHIR;SPSDTEGLVK
0.859571	0.783716	0.777687	0.804708	0.845683	0.779165	-0.00286071	0.0294211	5	5	14.187	O95298;E9PQ53	NDUFC2;NDUFC2-KCTD14	NADH dehydrogenase [ubiquinone] 1 subunit C2;NADH dehydrogenase [ubiquinone] 1 subunit C2, isoform 2		EDYLYAVR;FLPDEAR;LHPEDFPEEDKK;RNPEPLR;TYGEIFEK
1.8893	1.88272	1.83408	1.86585	1.95678	1.81718	-0.0112327	0.0899036	15	15	40.75	O95299	NDUFA10	NADH dehydrogenase [ubiquinone] 1 alpha subcomplex subunit 10, mitochondrial		EAQDSKK;FDKGPWLK;GDPHEMK;ITSAYLQDIENAYK;ITSAYLQDIENAYKK;KGDPHEMK;KVVEDIEYLK;KYSPGYNTEVGDK;LLQYSDALEHLLTTGQGVVLER;LQSWLYSSR;SNDGNSYR;TFLPEMSEK;VVEDIEYLK;YGMWHFLLGDK;YSPGYNTEVGDK
1.97821	1.95955	1.93025	1.89066	2.08173	2.06759	-0.0573206	0.382376	13	12	63.083	O95302;Q75LS8	FKBP9	Peptidyl-prolyl cis-trans isomerase FKBP9		DIPGQASLVFDVALLDLHNPK;DSISIENK;DSTFNVFVGK;FDSSYDR;FDSSYDRDSTFNVFVGK;IITIPPFLAYGEDGDGK;ISQSGDFLR;IVVPPHLGYGEEGR;LAPGFDAELIVK;LKDQEAKHDEL;TIQVSDFVR;VTAEEFK;YHYVGTFPDGQK
0.709518	0.703896	0.571459	0.643379	0.801648	0.618214	-0.0261227	0.131594	10	8	54.284	O95319	CELF2	CUGBP Elav-like family member 2		AALEAQNALHNIK;AMAQNAIK;ELFEPYGAVYQINVLR;ELKELFEPYGAVYQINVLR;KAALEAQNALHNIK;KLFIGMVSK;LFIGMVSK;MFVGQIPR;SKNDSKPY;SQNPPQSK
1.75442	1.72941	1.60159	1.79078	1.79884	1.813	-0.105737	1.03961	10	10	27.547	O95336	PGLS	6-phosphogluconolactonase		ELPAAVAPAGPASLAR;FALGLSGGSLVSMLAR;ILEDQEENPLPAALVQPHTGK;IVAPISDSPKPPPQR;LLTVPFEK;LPIPESQVITINPELPVEEAAEDYAK;LPIPESQVITINPELPVEEAAEDYAKK;LVPFDHAESTYGLYR;TVIFVATGEGK;VTLTLPVLNAAR
-3.04652	-2.94432	-3.1138	-3.02643	-2.63741	-3.07447	-0.122113	0.344356	7	3	35.486	O95343	SIX3	Homeobox protein SIX3		AVVAFHTGNFR;DLYHILENHK;ELAQATGLTPTQVGNWFK;EWYLQDPYPNPSK;GRPLGPVDK;LQAMWLEAHYQEAEK;TIWDGEQK
-1.2745	-2.19082	-1.83831	-2.25727	-1.70948	-1.11245	-0.0748116	0.061091	8	8	135.65	O95347	SMC2	Structural maintenance of chromosomes protein 2		ALEEELAGLK;ALNHEIEELEK;DTSATTALELVAGER;EAKSKAKPPK;GLVASLISVK;ILTTIEDLDQK;REAEDGAAK;TILEEEITPTIQK
1.37722	1.40865	1.4039	1.35544	1.55608	1.38661	-0.0361242	0.223563	18	18	77.959	O95352	ATG7	Ubiquitin-like modifier-activating enzyme ATG7		AAATGDPGLSK;ALAAADR;DVAHSIIFEVK;EGFNFLAK;FDNVLPVSLAFDK;HITFVDNAK;HYSDFFQGQR;IFPGVNAR;ISYSNPVR;LAESSVDLNLK;LLLEQAANEIWESIK;LVPTLDLDK;LVPTLDLDKVVSVK;NFLVLAAHR;SGTALENPVLLNK;VLDQYER;WLPAVIAASK;YDENMVLVSLLK
-4.72597	-4.59743	-4.56593	-4.8244	-4.52698	-4.91261	0.124888	0.420865	7	6	309.42	O95359	TACC2	Transforming acidic coiled-coil-containing protein 2		ANAEIAQVR;EQALADLNSVEK;GLAPNQESHLQVPEK;GTYTFDIDKWDDPNFNPFSSTSK;IGTAEVEKPAGLLFQQPDLDSALQIAR;KIVAEYEK;QATGEEK
0.243355	0.330833	0.193485	0.26656	0.675447	0.282125	-0.152153	0.472084	2	2	52.356	O95363	FARS2	Phenylalanine--tRNA ligase, mitochondrial		AHTSAHQWDLLHAGLDAFLVVGDVYRR;APGSVVELLGK
0.657412	0.753172	0.716776	0.645258	0.899514	0.54763	0.0116523	0.0363683	5	5	24.737	O95372	LYPLA2	Acyl-protein thioesterase 2		ALIEHEMK;ETAAVIFLHGLGDTGHSWADALSTIR;FGALTAEK;IPVTLNMK;SVVTPAR
2.74578	2.74295	2.77613	2.80389	2.96435	2.82872	-0.110699	1.01919	24	24	119.52	O95373	IPO7	Importin-7		AFAVGVQQVLLK;AIFQTIQNR;DGALHMIGSLAEILLK;DVPNETLQVEEDDRPELPWWK;ENIVEAIIHSPELIR;ETENDDLTNVIQK;EYNEFAEVFLK;FIQLLSDQSDQSVLIQK;FKSDQNLQTALELTR;FSAPVVPSSFNFGGPAPGMN;GIDQCIPLFVEAALER;GTMDPALR;KQLQDIATLADQR;MDPNTIIEALR;NPVWYQALTHGLNEEQR;QAGVIYLK;QLNEAHK;QLQDIATLADQR;SDQNLQTALELTR;SPLVAAMQHFLPVLK;VEAAIALQVLISNQEK;WALHILAR;WTAIVDK;YGSPGNVSK
0.511431	0.546942	0.576664	0.65403	0.633489	0.637409	-0.0966304	2.08227	9	9	57.818	O95376	ARIH2	E3 ubiquitin-protein ligase ARIH2		ADSYDRGDLENQMHIAEQR;GDLENQMHIAEQR;SLQLEAQTYQR;TPEDFVFPLLPNEELR;TPEDFVFPLLPNEELREK;VQPNPSK;VSHSVAK;YKENPDIVNQSQQAQAR;YLFYFER
0.753395	0.700354	0.529905	0.708529	0.597596	0.41922	0.0861031	0.328234	3	3	45.09	O95390	GDF11	Growth/differentiation factor 11		LKPLTGEGTAGGGGGGR;QVLHSWFR;SGHWQSIDFK
2.92434	2.94807	2.94905	2.9301	3.16187	2.9866	-0.085707	0.538498	21	21	59.851	O95394	PGM3	Phosphoacetylglucosamine mutase		AEHLDHVMFR;AFVELTK;AFVRPSGTEDVVR;ATIEGYYQK;DTRPSSEK;EAVNLQQDAFVVIGR;EMEHYFSQGLSVQLFNDGSK;GLTVQQWDALYTDLPNR;IKQSAEQLEDK;IVYYYHDADGHFHLIDGDK;MDLGAITK;MGLLAVLR;QAVTPPGLQEAINDLVK;QSAEQLEDK;QSAEQLEDKK;SHQKPPQGMEIK;TKAEHLDHVMFR;VISTTDAER;VLIDISEK;VQVADRR;YLEEVMK
-1.24671	-1.28705	-1.2334	-1.25127	-1.06742	-1.3032	-0.048426	0.26355	11	11	49.669	O95396	MOCS3	Adenylyltransferase and sulfurtransferase MOCS3;Molybdopterin-synthase adenylyltransferase;Molybdopterin-synthase sulfurtransferase		AFSAAASLR;DVVGGLMAWAAK;EEELNSLK;EEVLALQAEVAQR;IAAGLGPSYSGSLLLFDALR;IDGTFPQY;ILQSLSAAQELDPLTVR;LASALLAEQEPQPER;LVPVSPLPPK;QVLHGEALAGQAK;SLQLLSPEER
-3.39221	-3.3271	-3.33174	-3.30139	-2.70182	-3.64224	-0.135196	0.187405	3	3	43.538	O95397;Q96JA3	PLEKHA8P1	Putative protein PLEKHA9		IVLHEVEADVAQVR;MDLVENIK;MENLKNHDNNLSQSGSDSSCSPECLWEEGK
0.755522	0.570486	0.562328	0.710596	0.770713	0.764107	-0.119027	0.838178	1	1	14.295	O95399	UTS2	Urotensin-2		LTPEELER
0.450504	0.489201	0.403254	0.480022	0.520089	0.490297	-0.0491501	0.825108	11	11	37.646	O95400	CD2BP2	CD2 antigen cytoplasmic tail-binding protein 2		DSWLDNIDWVK;ERPPGQR;ETVAGALR;GDGLVDVMWEYK;KGPGQPSSPQR;KLDPPGGQFYNSK;KVTFQGVGDEEDEDEIIVPK;LSGLADQMVAR;LVDPVAGSGGPGSR;VTFQGVGDEEDEDEIIVPK;YDILASEDVEGQEAATLPSEGGVR
1.13598	1.1771	1.22336	1.1604	1.44893	1.23009	-0.100989	0.485409	27	27	247.74	O95425	SVIL	Supervillin		AAEFGEPTSEQTGTAAGK;ANPPITHLGDEPK;APASSLHTQEAGR;ASDPASPHIGR;ASELATLIQTK;ATYIQTIEEGINTHTHAAK;DQTNEGKELAEQGEPDSSTLSLAEK;DRLPFEEK;EDLLQEYTEQR;ELAEQGEPDSSTLSLAEK;ENFSNVSLR;EYGETESKR;FLDWTELKR;GAANDSTQFTVAGR;GAQVQVLQGK;GYGLVEGHDR;GYGLVEGHDRR;KEPDAVEK;LLEEDTPR;LMLLQIK;LTEHNETILFK;LVPDDDYWGK;SNEEEETSDSSLEK;SQAWQPLVEGSENK;TPTGEGLLDSPSK;YGLTLDPEADSEYLSR;YQTQPVTLGEVEQVQSGK
-3.59566	-3.59936	-3.5556	-3.54421	-3.38716	-3.53339	-0.0952905	0.841784	3	3	105.81	O95427	PIGN	GPI ethanolamine phosphate transferase 1		EVTLPFLFTPFK;LDTWVFDNVK;REDFGAQDATK
-3.16319	-3.20749	-3.32706	-3.30869	-2.90432	-3.17638	-0.102782	0.328596	1	1	49.593	O95429	BAG4	BAG family molecular chaperone regulator 4		IIHVLEK
2.62065	2.52701	2.52772	2.59075	2.74358	2.63266	-0.097202	0.815336	15	15	38.274	O95433	AHSA1	Activator of 90 kDa heat shock protein ATPase homolog 1		AKPAPSK;DASNWSTDK;DASNWSTDKLK;DEPDTNLVALMK;DEPDTNLVALMKEEGVK;EAMGIYISTLK;ETFLTSPEELYR;FHMVDGNVSGEFTDLVPEK;GIPAPEEER;LDGEASINNR;LNWTGTSK;QTFGYGAR;TQARPVGVK;VFTTQELVQAFTHAPATLEADR;YYFEGIK
-2.41693	-2.31272	-2.59523	-2.46029	-2.5022	-2.36108	-0.000440915	0.00155558	2	2	134.75	O95450	ADAMTS2	A disintegrin and metalloproteinase with thrombospondin motifs 2		IILLSYGK;NISDPSK
-1.14536	-1.01445	-1.02334	-1.2151	-0.864995	-1.18192	0.0262887	0.0775899	8	8	73.45	O95453	PARN	Poly(A)-specific ribonuclease PARN		ELSPAGSISK;FIDQVVEK;GIHVETLETEK;GIHVETLETEKK;LIEPFFNK;NSPATLFEVPDTW;VIHAIANSGK;VMDIPYLNLEGPDLQPK
-2.11368	-1.97563	-2.12689	-2.11582	-1.73592	-2.15866	-0.0685975	0.183082	4	4	32.854	O95456	PSMG1	Proteasome assembly chaperone 1		AATFFGEVVK;AGTEDEEEEEEGRR;LDLITVEAFKPILSTR;NIPQSTEILK
1.44749	1.47703	1.46089	1.48755	1.66354	1.49902	-0.0882324	0.699826	18	18	63.523	O95470	SGPL1	Sphingosine-1-phosphate lyase 1		AASYFGMK;AFEPYLEILEVYSTK;AGYPLEHPFDFR;ALPSQGLSSSAVLEK;ASGTVYSGEEK;AYGDFAWSNPLHPDIFPGLR;ESVTQIMK;GIFVFGNPQLSVIALGSR;GSSLVLYSDK;GSSLVLYSDKK;GVTSISADTHK;KIEAEIVR;LKEYSSMDAFWQEGR;LSNLMTAK;LTELLVK;SELENIK;TPEIVAPQSAHAAFNK;VAIQFLK
1.19003	1.14452	1.16002	1.24619	1.31746	1.24253	-0.103872	1.69454	8	4	27.687	O95475	SIX6	Homeobox protein SIX6		AEGDGTPEVLGVATSPAASLSSK;AIVAFHGGNYR;ELAQATGLTPTQVGNWFK;ELYHILENHK;EWYLQDPYPNPSK;GRPLGPVDK;LQALWLEAHYQEAEK;TIWDGEQK
-2.35279	-1.90725	-1.57216	-2.1396	-2.00556	-2.13717	0.150039	0.259306	3	3	28.377	O95476	CTDNEP1	CTD nuclear envelope phosphatase 1		DLSVVHSDLSSIVILDNSPGAYR;SHPDNAIPIK;VVIDKHPVR
-7.81458	-7.67029	-7.57192	-7.79816	-7.10195	-7.94705	-0.0698773	0.0923557	3	2	254.3	O95477	ABCA1	Phospholipid-transporting ATPase ABCA1		EGAFVELFHEIDDR;GIWELLLK;ILDGGGQNDILEIK
2.05699	2.03905	2.0858	2.12083	2.26597	2.18095	-0.128636	1.35853	24	24	88.892	O95479	H6PD	GDH/6PGL endoplasmic bifunctional protein;Hexose-6-phosphate dehydrogenase;6-phosphogluconolactonase		ALDGLWNR;DIEAQLQHAGLR;EITTLVSR;ESPLVSAWSEELISK;ETVDAEGR;GHSFSFHGAALTAPK;GSAVVGQYQSYSEQVR;IPYYNIHPMPVHLQQR;LANDIEATAVR;LFFSQQQPEQLVPGPGPAPMPSDFQVLR;LFGSPLSDYYAYSPVR;LLDFEFSSGR;LQVFQALR;MSLSLPLINR;NLFRPSLPSSWK;QAVAQILPFR;QGQELMAK;QLVFHIGHGDLGSPAVLVSR;TAEDYQALNK;TAEDYQALNKDIEAQLQHAGLR;TSFYEEYGVIR;VAVLVMGR;VDHYLGK;WEGVPFILMSGK
0.827337	0.767641	0.796087	0.847477	0.927623	0.803967	-0.0626669	0.713946	18	16	119.75	O95486	SEC24A	Protein transport protein Sec24A		ANFLQNMIEDR;DALVNAVIDSLSAYR;DIHMTPSTDFYK;DLVQLPVVTSSTIVR;ELVQDLLK;EQRPFFPILYVIR;KIGFEAVMR;LMSPTGGR;LPLGLLLHPFK;MSVFQTQLPTLGVGALKPR;SFQTGTNAR;TIPQPPILQLSVEK;TLETQSALGPALQAAFK;TLPQMFTK;TYINPFVSFLDQR;VDNLSDEGALNISDR;VNDVPEEFLYNPLTR;VVNLLQER
1.593	1.61328	1.59777	1.59706	1.78821	1.59432	-0.0585114	0.381486	22	20	137.42	O95487	SEC24B	Protein transport protein Sec24B		AEFFQHLIEDR;AKLPLGLLLHPFR;DLLNALPNMFTNTR;DLTQLPVITSNTIVR;ETHSALGPALQAAFK;IVPQPPLQK;KIGFEAVMR;LMSPTGGR;LPLGLLLHPFR;LTDEGAVHVNDR;MIHPNLYR;MTHLPELDTLSSER;SAPAGSSHPAASAR;SFITWLR;SQPLVHLMK;SSPVVSTVLSGSSGSSSTR;SVSSSLSDAR;SYGEPHK;TPPTANHPVEPVTSVTQPSELLQQK;VNDVPEEFMYNPLTR;VSVFQTQLPSLGAGLLQSR;VVQHLGPATDFYK
-0.611174	-0.597733	-0.685551	-0.65312	-0.401504	-0.634445	-0.0684627	0.329966	9	9	163.35	O95490	ADGRL2	Adhesion G protein-coupled receptor L2		AALPFGLVR;AIVDTVDNLLRPEALESWK;GAGSSIQLSANTVK;GEYVDVPFPNQYQYIAAVDYNPR;GPVFAGDVSSSVR;LVFIIYR;SGENAASLANELAK;SVYQDNESETGK;TDTLIEYASLEDFQNSR
-3.83933	-3.81892	-3.88531	-3.91151	-3.67183	-3.77245	-0.0625887	0.361557	5	4	43.898	O95503	CBX6	Chromobox protein homolog 6		AEASAPGPGLLLAAPAAPYDAR;EPEVLDLSLPPESAATSK;LIAAFEQK;MELSAVGER;VFAAESIIK
-1.80448	-1.74235	-1.81067	-1.8355	-1.55498	-1.85417	-0.037617	0.140381	7	7	40.929	O95551	TDP2	Tyrosyl-DNA phosphodiesterase 2		AAAEEGHIIPR;ALNSYFEPPVEESALER;EAAEEEGEPEVK;RPETISEPK;SLDLLGLEK;SQEIIPFPSTK;TYVDLTNEETTDSTTSK
-0.542852	-0.549135	-0.577436	-0.467598	-0.582782	-0.505033	-0.0380036	0.461807	4	4	14.279	O95563	MPC2	Mitochondrial pyruvate carrier 2		LLDKVELMLPEK;LRPLYNHPAGPR;TVFFWAPIMK;YSLVIIPK
-3.27917	-3.26091	-3.21734	-3.28864	-2.97953	-3.26777	-0.0738262	0.295034	3	3	27.873	O95571	ETHE1	Persulfide dioxygenase ETHE1, mitochondrial		EAVLIDPVLETAPR;LSGAQADLHIEDGDSIR;TLYHSVHEK
2.51352	2.53355	2.5082	2.5247	2.61918	2.49215	-0.02692	0.278456	21	20	80.419	O95573	ACSL3	Fatty acid CoA ligase Acsl3		ADFFEDENGQR;AKPVNSKPDSAYR;DIVSLVPR;ELTELAR;EVLNEEDEVQPNGK;GDTSMLKPTLMAAVPEIMDR;GEILIGGQSVTMGYYK;GIIVHTMAAVEALGAK;GVMISHSNIIAGITGMAER;HIITVDGKPPTWSEFPK;IGYSSPQTLADQSSK;LKDIVSLVPR;LKNWEEGGYFNTDKPHPR;LSPEPWTPETGLVTDAFK;NLFILAYNYK;NWEEGGYFNTDKPHPR;SLLGGNIR;THYQADIER;TKADFFEDENGQR;VLSEAAISASLEK;VSEMSSFQR
-3.72472	-3.46529	-3.6007	-3.75756	-3.34928	-3.77598	0.030702	0.0677701	6	6	194.81	O95602	POLR1A	DNA-directed RNA polymerase I subunit RPA1		AALNLPEAASYDEVR;DSDGSVVQFLYGEDGLDIPK;ELVLNTEGINLPELFK;LPEEVATPTTDEEKDSLIAIDR;SFLSTLPGQSLIDK;VLEVGALQAVYELER
0.409126	0.452698	0.478535	0.452755	0.488437	0.388786	0.00346025	0.0329055	8	7	26.499	O95619	YEATS4	YEATS domain-containing protein 4		EKLEAAK;HETEFAELEVK;IFFIDPNERPVTLYHLLK;KLEEDDQAKDI;LFQSDTNAMLGK;LHESYGNPLR;MAEFGPDSGGR;TSFEIAELK
-0.239359	-0.199848	-0.111931	-0.185713	-0.0204706	-0.2659	-0.0263516	0.117713	8	7	63.509	O95628	CNOT4	CCR4-NOT transcription complex subunit 4		ALADLIEK;HQEYEQK;KPYPEDPAVYKPLSQEELQR;LADPEVLK;LLQELYK;LNPNFLQLSTGSVDK;SPFEGAVTESQSLFSDNFR
0.764671	0.757568	0.744587	0.781992	1.0009	0.810476	-0.108848	0.722051	12	12	48.076	O95630	STAMBP	STAM-binding protein		AEELKAELLK;AVTITDLR;EYTEYNEEK;FQETGFFK;GFHPHSK;HVVVPGR;IVQEFGK;LKEIAFPK;NEFTITHVLIPK;NQELEKER;SLKPGALSNSESIPTIDGLR;YITLFIEK
-4.03818	-3.71005	-4.14732	-4.39038	-3.47774	-4.08107	0.0178776	0.0199472	2	2	30.255	O95639	CPSF4	Cleavage and polyadenylation specificity factor subunit 4		FELPMGTTEQPPLPQQTQPPAK;MQEIIASVDHIK
-1.74044	-1.63541	-1.32347	-1.773	-1.52654	-1.90565	0.168625	0.430967	7	5	13.604	O95670	ATP6V1G2	V-type proton ATPase subunit G 2		ASQSQGIQQLLQAEK;ASQSQGIQQLLQAEKR;EEAQMEVEQYR;EHEFQSK;EREHEFQSK;QQAAMGSQGNLSAEVEQATR;QVQGMQSSQQR
2.35578	2.31694	2.33698	2.3292	2.4739	2.34831	-0.047239	0.432458	19	19	68.856	O95671	ASMTL	Probable bifunctional dTTP/UTP pyrophosphatase/methyltransferase protein;dTTP/UTP pyrophosphatase;N-acetylserotonin O-methyltransferase-like protein		AADIASK;AEDLFQDAYYQSPETR;ALEVANR;ALMQSLNMLVQTEGK;AMHGMTK;APDVVIGADTIVTVGGLILEKPVDK;ASFATPYGYAMETAK;DHQLDTR;ETLPPFPTR;HDSIPAADTFEDLSDVEGGGSEPTQR;ILHDWPDDK;ILHDWPDDKVHK;KAEDLFQDAYYQSPETR;LLELIEGFMLSK;LYYPPRPEDLR;RQEILSNAGLR;VFDLLKDEAPQK;VSEFYEETK;VVLASASPR
1.97586	1.93504	1.97477	1.93967	1.8779	1.89167	0.0588102	1.19972	8	8	51.417	O95674	CDS2	Phosphatidate cytidylyltransferase 2		AESAPLPVSADDTPEVLNR;ALSNLSSR;GMLTSTTEDE;LQEYNIPGVIQSVIGWK;VAHEPVAPPEDK;VAHEPVAPPEDKESESEAK;VAHEPVAPPEDKESESEAKVDGETASDSESR;VDGETASDSESR
-1.89904	-1.56366	-0.628866	-1.69649	-1.25198	-1.59721	0.151371	0.138821	3	3	43.064	O95684	CEP43	Centrosomal protein 43		DLGIIEAEGTVGGPLLLEVIR;SGLSSLAGAPSLK;TPLVNESLKK
-2.79714	-3.10045	-3.00704	-2.88604	-2.87124	-2.75866	-0.129564	0.588614	2	2	32.559	O95685	PPP1R3D	Protein phosphatase 1 regulatory subunit 3D		FADALGLELAQVK;GPSSAVLPSALGSR
-1.04272	-1.02756	-1.16712	-1.17081	-1.01136	-1.11462	0.0197948	0.111502	6	6	119.52	O95696	BRD1	Bromodomain-containing protein 1		AHLGLEEQLR;EVPDYLDHIK;IFAQPVSLK;LLIELLR;LTPLTVLLR;RPFSWEDVDR
-1.02677	-0.978344	-0.998737	-1.02029	-0.837968	-1.0492	-0.0321315	0.180902	17	17	527.22	O95714	HERC2	E3 ubiquitin-protein ligase HERC2		AAGPEPQALDEFTSLLIADDTR;DPLGASYLGVPSDADSSAASNK;EQQALAVQSATTTLSALR;GVEGLAR;HATALTVDGK;KPQVVEGLR;LEIFPDVLVHR;LFLDEVAK;LGHGDTVPLEEPK;LHEFDEQVAAVR;LLGENDGETR;LVEALQGHR;NNEEVTLIR;QITALSSYVVK;SAQGTSAPLLPLLQR;VAVALDK;VVVDLLK
0.754545	0.709665	0.536037	0.690367	0.71473	0.611784	-0.00554434	0.0252574	8	5	24.267	O95716	RAB3D	Ras-related protein Rab-3D		DAADQNFDYMFK;LADDLGFEFFEASAK;LLLIGNSSVGK;LVDVICEK;TITTAYYR;VVPAEDGR;VVPAEDGRR;YADDSFTPAFVSTVGIDFK
-1.30581	-1.20308	-1.33296	-1.3182	-0.859752	-1.09132	-0.19086	0.621237	11	11	28.97	O95721	SNAP29	Synaptosomal-associated protein 29		DLPDGPDAPADR;GAGSAMSTDAYPK;IDSNLDELSMGLGR;KLDDTDPVPR;LKEAISTSK;SLALMYESEK;SVFGGLVNYFK;SYNPFDDDGEDEGARPAPWR;VDKLDVNIK;VGVASSEELAR;YQASHPNLR
1.85685	1.78931	1.74534	1.78665	1.95998	1.85603	-0.0703872	0.515461	18	17	58.022	O95747	OXSR1	Serine/threonine-protein kinase OSR1		AAISQLR;APTISER;DELWLVMK;DLVIVAANLQK;DPEKRPTAAELLR;DTAEGVSQELISAGLVDGR;EVLEGLEYLHK;IPISLVLR;IVEEPQSNR;LASGVEGSDIPDDGK;LLSGGSVLDIIK;NKEFLQEK;RPTAAELLR;RVPGSSGR;SEDSSALPWSINR;SGVLDESTIATILR;TAQALSSGSGSQETK;VLMLTLQNDPPSLETGVQDK
0.909868	0.906811	0.880072	0.930151	1.01004	0.926098	-0.0565119	0.912223	7	7	34.87	O95749	GGPS1	Geranylgeranyl pyrophosphate synthase		GGNPELVALVK;ILLEPYK;LSQAFNHWLK;QLLELHQGQGLDIYWR;TQETVQR;VLTLDHPDAVK;YLLQLPGK
-8.3885	-8.13519	-7.82404	-8.39118	-7.74087	-8.26893	0.0177431	0.0229939	1	1	29.679	O95755	RAB36	Ras-related protein Rab-36		VAALAFEQSVLQDLER
4.20221	4.17608	4.15984	4.12615	4.09219	4.00768	0.104032	1.30587	41	38	94.511	O95757	HSPA4L	Heat shock 70 kDa protein 4L		AEVPEDKPK;AIGNAAK;ALNDLGK;ALNDLGKK;AVMEQANLQR;DISTTLNADEAVAR;DSSQHTK;EDISSIEIVGGATR;EFSITDLVPYSITLR;EPFELEAFYTNLHEVPYPDAR;ETSENALK;FITPEDLSK;IGSFTIQNVFPQSDGDSSK;KEPFELEAFYTNLHEVPYPDAR;KIQLVMK;KPVADCVISIPSFFTDAER;LGTVYEK;LKETSENALK;LMNETTAVALAYGIYK;LNQTLKK;LPYELQK;LSLTQDPVVK;MIMQDKLEK;MQVDQEEGHQK;NAVEEYVYDFR;NHPAPFSK;NTIHGFK;QDLPPLDEKPR;QLGQDLLNSYIENEGK;QNLEGDHSDAPMETETSFK;SAVSDKQDR;SFDDPIVQTER;SG…
-2.16787	-1.92874	-1.98666	-2.14315	-1.63855	-2.02716	-0.0914666	0.210033	8	5	59.689	O95758	PTBP3	Polypyrimidine tract-binding protein 3		AQAALQAVSAVQSGSLALSGGPSNEGTVLPGQSPVLR;DFSNSPLHR;EGQEDQGLTK;ELKTDNLPNQAR;HQAVQLPR;LTSLNVK;MDGVVTDLITVGLK;VTNLLMLK
-0.839058	-0.660284	-0.931091	-1.00463	-0.472194	-0.720438	-0.0777241	0.169567	2	2	26.654	O95772	STARD3NL	STARD3 N-terminal-like protein		IESYEGR;LLIVQDASER
-0.0836449	-0.076479	-0.235052	-0.117929	0.130366	0.208298	-0.205304	0.858914	5	5	10.403	O95777	LSM8	U6 snRNA-associated Sm-like protein LSm8		AEPLNSVAH;GDNVAVIGEIDEETDSALDLGNIR;GFDQTINLILDESHER;TSALENYINR;TVAVITSDGR
4.10486	4.00749	4.0083	4.05776	4.06766	4.01788	-0.00754833	0.0741809	40	27	107.54	O95782	AP2A1	AP-2 complex subunit alpha-1		ALDGYSK;ALLLSTYIK;ANHPMDAEVTK;ASPDLVPMGEWTAR;ATIQGVLR;DDVQGYAAK;DFLTPPLLSVR;EMGEAFAADIPR;ESSILAK;FFQPTEMAAQDFFQR;FINLFPETK;GLAVFISDIR;GPGAGSALDDGR;GPGAGSALDDGRR;IAGDYVSEEVWYR;ILVAGDSMDSVK;INKELANIR;KGPGAGSALDDGR;KKGPGAGSALDDGR;KNPDDFK;KVQHSNAK;LEPNAQAQMYR;LINNAIK;LLGFGSALLDNVDPNPENFVGAGIIQTK;LPVTINK;MYLFYGNK;NADVELQQR;QIVSEMLR;QLSLPQQEAQK;SSPPVQFSLLHSK;THIDTVINALK;TSVQFQNFSPTVVHPGDLQTQLAVQTK;VAIL…
0.626783	0.697567	0.607185	0.636585	0.883473	0.622007	-0.0701768	0.323077	13	13	178.67	O95785	WIZ	Protein Wiz		AADGGERPLAASPPGTVK;ADPPPEESQAPQAQTAAAEAP;AQWPQSEDEGPLNLTSGPEPAR;ELSLTPITGAKPSATGYLGSVAAK;FVGNIYTLK;GGEDTNDLQQK;GLGHPPSSPLLK;GLPDAHLGLPPGLAK;KGLSSHAR;LLPAEVK;QLGVAESESSGAPIDLLYELVK;RPLQEDR;TYIQTELPFK
-2.85885	-2.81176	-2.93941	-2.91365	-2.62653	-2.9502	-0.0398808	0.135019	8	8	106.6	O95786	RIGI	Antiviral innate immune response receptor RIG-I		AAGFDEIEQDLTQR;GPMEAATLFLK;IESFVVEDIATGVQTLYSK;ILHIQTHEK;LQTWDEAVFR;LSFLKPGILTGR;RSLQAFQDYIR;SLQAFQDYIR
1.64653	1.53807	1.59003	1.57774	1.66732	1.54978	-0.00673834	0.0488505	22	19	63.182	O95793	STAU1	Double-stranded RNA-binding protein Staufen homolog 1		AAPNPAK;EFVMQVK;EKEPEYTLLTER;ELLYGGTSPTAETILK;ESEEENLNK;ESGPPHMK;ILQNEPLPER;KEKEPEYTLLTER;KLPPLPAVER;LAQIQQAK;LLSELDQQSTEMPR;NAAENMLEILGFK;NAAIAVLEELK;NAAIAVLEELKK;NLPVNFEVAR;SEISQVFEIALK;TKPIVKPQTSPEYGQGINPISR;VGNHTAEGTGTNK;VPQAQPTKPALK;VQGFQVEYK;VSVGEFVGEGEGK;VTFFEPGSGDENGTSNKEDEFR
-3.39463	-3.46687	-3.50783	-3.61528	-3.14909	-3.56307	-0.013964	0.0311308	2	2	44.678	O95801	TTC4	Tetratricopeptide repeat protein 4		AVISYTEGLK;NQNEALLQAIK
-5.65461	-5.74964	-5.57067	-5.77043	-5.20435	-5.58783	-0.137435	0.323027	1	1	17.4	O95807	TMEM50A	Transmembrane protein 50A		SGFLEGLR
0.121943	0.15679	0.147985	0.133226	0.284087	0.129765	-0.0401201	0.316098	8	8	23.772	O95816	BAG2	BAG family molecular chaperone regulator 2		EAATAVEQEK;EILLEMIHSIQNSQDMR;FLDDLGNAK;IIDEVVNK;LLESLDQLELR;NIENSDK;QISDGEREELNLTANR;RLETLLR
0.382206	0.403271	0.353622	0.323683	0.537688	0.410929	-0.0444002	0.280155	12	12	61.594	O95817	BAG3	BAG family molecular chaperone regulator 3		AAPSTAPAEATPPKPGEAEAPPK;EGHPVYPQLRPGYIPIPVLHEGAENR;ELLALDSVDPEGR;GMPETTQPDK;IDPQTGWPFFVDHNSR;SSLGSHQLPR;SSTPLHSPSPIR;SVATEER;VEAILEK;VQGLEQAVDNFEGK;VQGLEQAVDNFEGKK;YLMIEEYLTK
1.85612	1.87793	1.86363	1.71407	1.93715	1.75514	0.0637782	0.390744	25	14	142.1	O95819	MAP4K4	Mitogen-activated protein kinase kinase kinase kinase 4		AHYEPADR;ALFLIPR;AVEDVRPPHK;DSPLQGSGQQNSQAGQR;DVVLQWGEMPTSVAYIR;EQEEYKR;FLVIALK;GNTLKEDWIAYISR;GQNVLLTENAEVK;GSVVNVNPTNTRPQSDTPEIR;ILHNDPEVEK;ILHNDPEVEKK;KGSVVNVNPTNTRPQSDTPEIR;NIATYYGAFIK;QQLLQEQQLR;QTQSASSTLQK;RLEELER;SEGSPSQR;SFGELVHKPLLVDLTVEEGQR;SVETGHLDGVFMHK;TGQLAAIK;VFFASVR;VLEPPVPSR;VYPLINR;VYYLSWLR
-0.381811	-0.396151	-0.378325	-0.41226	-0.150199	-0.460882	-0.044315	0.173696	10	10	55.003	O95822	MLYCD	Malonyl-CoA decarboxylase, mitochondrial		ADLLEAQALK;ASEQVLSLVAQFQK;AVPPTPAYELR;EAAVLLQAEDR;EISEITGGPINETLK;GFGVDHGQVAEQSAGVLHLR;GLFHHISK;ISEAEAVHPVK;LVEGPDVR;YFLEETGPNSTSYLGSK
-0.289515	-0.36393	-0.297491	-0.265078	-0.203946	-0.174305	-0.102536	1.34515	10	10	38.696	O95825	CRYZL1	Quinone oxidoreductase-like protein 1		AYTALHYLSHLSPGK;DLFPVGR;EDLPVTEDNFVK;EIAGIVLDVGSK;GATLAFLNDEVWNLSNVQQGK;LQLLPHK;LSTGVFRPQLDEPIPLYEAK;LYSKDDEPAVK;VSMEAVQK;VTWTEAAGSIR
3.08787	3.03448	3.07133	3.08207	3.17626	3.02673	-0.0304562	0.261597	26	26	66.9	O95831	AIFM1	Apoptosis-inducing factor 1, mitochondrial		AALSASEGEEVPQDK;AALSASEGEEVPQDKAPSHVPFLLIGGGTAAFAAAR;ALGTEVIQLFPEK;APSHVPFLLIGGGTAAFAAAR;ATAQDNPK;DGEQHEDLNEVAK;ELWFSDDPNVTK;GVIFYLR;IIKDGEQHEDLNEVAK;ILPEYLSNWTMEK;ISGLGLTPEQK;KAALSASEGEEVPQDK;KVETDHIVAAVGLEPNVELAK;KVVQLDVR;LFNIHED;LNDGSQITYEK;RVEHHDHAVVSGR;SATEQSGTGIR;SESETESEASEITIPPSTPAVPQAPVQGEDYGK;SLSAIDR;TGGLEIDSDFGGFR;VEHHDHAVVSGR;VETDHIVAAVGLEPNVELAK;VLIVSEDPELPYMRPPLSK;VMPNAIVQSVGVSSGK;V…
-0.486164	-0.366203	-0.54126	-0.718563	-0.166289	-0.572329	0.0211846	0.0416768	10	10	70.678	O95834	EML2	Echinoderm microtubule-associated protein-like 2		DGTLVSGGGR;EVIFSVEDGSVK;HYLGHNDDIK;IIEDPAR;LLASADDFGK;LQEVEVPEDFGPVR;QITSADAVR;SAGFHPSGSVLAVGTVTGR;TKEVIFSVEDGSVK;TVAEGHGDTLYVGTTR
-4.60006	-4.20563	-4.80039	-4.71972	-3.92568	-4.48472	-0.158653	0.209578	1	1	126.87	O95835	LATS1	Serine/threonine-protein kinase LATS1		LSPEASDLIIK
-2.94785	-2.86146	-3.07993	-3.02297	-2.91129	-3.15935	0.0681251	0.287069	7	1	41.57	O95837	GNA14	Guanine nucleotide-binding protein subunit alpha-14		EYQLSDSAK;FVFAAVK;IIHGSGYSDEDRK;KDLLEEK;LLLLGTGESGK;MVDVGGQR;VPTTGIIEYPFDLENIIFR
-0.769121	-0.701687	-0.586603	-0.45417	-0.519408	-0.793549	-0.0967614	0.342846	6	6	56.719	O95841	ANGPTL1	Angiopoietin-related protein 1		DNSLELSQLENK;EIDVLQLVVDVDGNIVNEVK;IPPVTFINEGPFK;LEPESEFYR;LLIELEDWSDKK;VYAEYSSFR
0.659235	0.613178	0.741917	0.710993	0.678002	0.811707	-0.0621239	0.491389	6	6	24.118	O95848	NUDT14	Uridine diphosphate glucose pyrophosphatase NUDT14		IEGASVGR;QFRPAVYAGEVER;QTMFYTEVTDAQR;RFPGSLAAVDQDGPR;THDSVTVLLFNSSR;VATYWSGVGLTGSR
1.53411	1.55882	1.58014	1.54388	1.72915	1.59177	-0.0639086	0.487218	13	13	33.392	O95861	BPNT1	3(2),5-bisphosphate nucleotidase 1		AIAGVINQPYYNYEAGPDAVLGR;ASSNTVLMR;EEDLVVWVDPLDGTK;EYTEGLLDNVTVLIGIAYEGK;HIITTTR;HMNSAGVLATLR;IIQLIEGK;LTDIHGNVLQYHK;LVASAYSIAQK;NYDYYASR;RVIAEGDLGIVEK;VGGAGNK;VIAEGDLGIVEK
-0.292625	-0.249815	-0.326954	-0.21756	-0.0422049	-0.284637	-0.108331	0.64713	6	6	52.259	O95864	FADS2	Acyl-CoA 6-desaturase		AFHPDLEFVGK;EVSVPTFSWEEIQK;FVIGHLK;LWLDAYLHK;VIGHYAGEDATDAFR;WNHLVHK
2.30002	2.37317	2.24697	2.24036	2.53937	2.34464	-0.0680672	0.289794	15	14	29.644	O95865	DDAH2	Putative hydrolase DDAH2		ALQDLGLR;DFAVSTVPVSGPSHLR;EFFVGLSK;EHGVLGGK;GAEIVADTFR;GAEIVADTFRDFAVSTVPVSGPSHLR;GGGDLPNSQEALQK;GTPGEGLGR;GVPESLASGEGAGAGLPALDLAK;IVEIGDENATLDGTDVLFTGR;KALQDLGLR;LSDVTLVPVSCSELEK;RPEVDGVR;RPEVDGVRK;TVVAGSSDAAQK
1.71671	1.72265	1.69608	1.71822	1.90061	1.82337	-0.102251	0.891497	17	17	63.243	O95870	ABHD16A	Phosphatidylserine lipase ABHD16A		ALMPVLLQGQAR;APASVPETPTAVTAPHSSSWDTYYQPR;DEIITTTVPEDIMSNR;GNDLLLK;GTADTLLNR;GTAEPQGQK;GVALLRPEPLHR;MLYPGSVYLLQK;QFITILEATHR;QLALFLAR;QLANYNFDFR;QWLEASSQLEEASIYSR;RGTAEPQGQK;SWPVDFHWEEPSSR;TKDEIITTTVPEDIMSNR;VMAEEGLR;YQGPVLLIR
0.540604	0.581499	0.562151	0.63784	0.679803	0.691973	-0.108454	2.23514	6	6	19.206	O95881	TXNDC12	Thioredoxin domain-containing protein 12		EAAASGLPLMVIIHK;GFGDHIHWR;ILFLDPSGK;KHLEDEL;VHPEIINENGNPSYK;YFYVSAEQVVQGMK
-2.67677	-2.79839	-2.8125	-2.80441	-2.75731	-2.69971	-0.00874106	0.0573917	4	4	51.386	O95897	OLFM2	Noelin-2		LDPHTLEVMR;LTGVSNPITVR;MTELLPLSSVLEQYK;TLGDFIK
-1.17191	-1.22205	-1.20477	-1.34618	-1.19521	-1.39701	0.113219	0.842851	3	3	28.722	O95926	SYF2	Pre-mRNA-splicing factor SYF2		KNPDLGFSDYAAAQLR;LEWELKEEEK;LLEISAEDAER
-0.164495	-0.338051	-0.467566	-0.356131	-0.340795	-0.33453	0.0204477	0.0821163	4	4	49.405	O95967	EFEMP2	EGF-containing fibulin-like extracellular matrix protein 2		AGNSQGDFYIR;EQPSSIVHR;SVPADVFQIQATSVYPGAYNAFQIR;YMTITSER
-4.21649	-4.05343	-4.22664	-4.15798	-4.03154	-4.1761	-0.0436474	0.237884	1	1	106.46	O95980	RECK	Reversion-inducing cysteine-rich protein with Kazal motifs		KPITVLEILQK
1.69329	1.67482	1.6799	1.66796	1.72843	1.67422	-0.00753371	0.139552	9	8	32.844	O95983	MBD3	Methyl-CpG-binding domain protein 3		AFMVTDEDIR;DGEAPLDK;GKPDLNTALPVR;KLSGLNAFDIAEELVK;KQEELVQQVR;LSGLNAFDIAEELVK;QTASIFK;YDSSNQVK;YLGGSMDLSTFDFR
-1.52068	-1.46972	-1.41402	-1.51818	-1.452	-1.42723	-0.00233682	0.0189341	7	7	96.661	O95985	TOP3B	DNA topoisomerase 3-beta-1		EAQVEATSR;GDAFPVGEVK;IDAELVLPTIR;LLAEGINRPR;QVLGHTLDVFK;TETTHYPENFDLK;TVLMVAEKPSLAQSIAK
1.62911	1.64524	1.69283	1.67521	1.85229	1.68384	-0.0813869	0.599866	7	7	19.471	O95989	NUDT3	Diphosphoinositol polyphosphate phosphohydrolase 1		EVCEEAGVK;LVGIFENQER;SESEEEVLLVSSSR;TYDGDGYK;TYDGDGYKK;VLQYHKPVQASYFETLR;WIVPGGGMEPEEEPSVAAVR
-2.86553	-2.89713	-2.93447	-2.94661	-2.71889	-2.99258	-0.0130177	0.0514844	4	4	26.251	O95999	BCL10	B-cell lymphoma/leukemia 10		DALENLR;EKTQNFLIQK;GLDTLVESIR;LLDYLQENPK
0.588955	0.585033	0.546095	0.559288	0.781192	0.611183	-0.0771933	0.491919	7	7	20.776	O96000	NDUFB10	NADH dehydrogenase [ubiquinone] 1 beta subcomplex subunit 10		AFDLIVDRPVTLVR;DYKVDQEIINIMQDR;EAAAATS;EVEQFTQVAK;TPVQPNPIVYMMK;VDQEIINIMQDR;YQDLGAYSSAR
-0.0969467	-0.103455	-0.125546	-0.0953503	0.0213289	-0.13203	-0.039965	0.35321	10	10	76.096	O96005	CLPTM1	Putative lipid scramblase CLPTM1		GPAPQDQAGPGGAPR;GSVPPPLDQYVK;LATVHMSR;NLLTGETEADPEMIK;SGFHPDPR;SPWNFLGDELYEQSDEEQDSVK;STYIESSTK;SVAHLPWR;VNEFGMSGEDPTAAAPVAEVPTAAGALTPTPAPTTTTATR;WQLYAAQSTK
-0.466145	-0.306017	-0.0771503	-0.346388	0.0410051	-0.347073	-0.0656188	0.141696	6	6	20.944	O96007	MOCS2	Molybdopterin synthase catalytic subunit		EIYEESSTWK;HIAVFHR;KEIYEESSTWK;LPLSPPLVEDSAFEPSR;LPLSPPLVEDSAFEPSRK;SKDVINFTAEK
1.44104	1.45555	1.43172	1.42486	1.41923	1.39691	0.0291058	1.24305	7	7	37.893	O96008	TOMM40	Mitochondrial import receptor subunit TOM40 homolog		ELFPIQMEGVK;FVNWQVDGEYR;GSVDSNWIVGATLEK;MAIQTQQSK;MQDTSVSFGYQLDLPK;QLSPTEAFPVLVGDMDNSGSLNAQVIHQLGPGLR;RPGEEGTVMSLAGK
-0.134434	-0.0788021	-0.0402088	-0.131414	0.336034	-0.197973	-0.0866969	0.195627	7	7	28.431	O96011	PEX11B	Peroxisomal membrane protein 11B		AVHLSDVVLR;FSAQSQAR;GHPPLLLDVVR;GSGGGVPGGSETGGLGGPGTPGGGLPQLALK;HGASPELQK;LQVLLLAR;QLESHLSLGR
-0.577845	-0.584818	-0.521509	-0.612318	-0.356914	-0.609629	-0.0351038	0.150386	9	8	64.071	O96013	PAK4	Serine/threonine-protein kinase PAK 4		ADTDHPSR;ATAAELLK;DGALTLLLDEFENMSVTR;FAGHSEAGGGSGDR;SDSILLTHDGR;SYLDNFIK;VEISAPSNFEHR;VHTGFDQHEQK;VSHEQFR
-4.49059	-4.42821	-4.52218	-4.48019	-4.09919	-4.54464	-0.105654	0.303335	1	1	39.179	O96014	WNT11	Protein Wnt-11		GLQELQDVAADLK
1.94294	1.8928	1.86643	1.92371	2.05007	1.96935	-0.0803188	0.864309	13	11	47.46	O96019	ACTL6A	Actin-like protein 6A		DDGSTLMEIDGDKGK;EGSPANWK;ELFQEMNIELVPPYMIASK;ENMEAISPLK;IPEGLFDPSNVK;LIANNTTVER;LKIPEGLFDPSNVK;QEYEEGGK;QGGPTYYIDTNALR;SEASLHPVLMSEAPWNTR;SGGVYGGDEVGALVFDIGSYTVR;STGLILDSGATHTTAIPVHDGYVLQQGIVK;VDFPTAIGMVVER
-0.983875	-1.02434	-1.05639	-1.06339	-0.892465	-1.04719	-0.0205164	0.129018	10	10	152.26	O96028	NSD2	Histone-lysine N-methyltransferase NSD2		ASTAASSALGFSK;GIGTPPNTTPIK;IQDPTEDAEAEDTPR;LLKPISGK;QYHVQFFGDAPER;SLVAFEGEGQFEK;SQWSLLSEK;VQIYTADISEIPK;YDSLLEQGLVEAALVSK;YNVGDLVWSK
-1.21021	-1.10835	-1.25484	-1.21028	-0.605088	-1.08403	-0.224664	0.521298	4	4	15.33	P00167	CYB5A	Cytochrome b5		AEQSDEAVK;FLEEHPGGEEVLR;TFIIGELHPDDRPK;YYTLEEIQK
5.59176	5.52663	5.52011	5.5836	5.74424	5.57601	-0.0884504	0.675896	29	27	36.688	P00338;P07864;Q6ZMR3	LDHA	L-lactate dehydrogenase A chain		ATLKDQLIYNLLK;ATLKDQLIYNLLKEEQTPQNK;DDVFLSVPCILGQNGISDLVK;DLADELALVDVIEDK;DLADELALVDVIEDKLK;DQLIYNLLK;DQLIYNLLKEEQTPQNK;DYNVTANSK;EEQTPQNK;EVHKQVVESAYEVIK;FIIPNVVK;GEMMDLQHGSLFLR;GYTSWAIGLSVADLAESIMK;IVSGKDYNVTANSK;IVSGKDYNVTANSKLVIITAGAR;KSADTLWGIQK;LKGEMMDLQHGSLFLR;LLIVSNPVDILTYVAWK;LVIITAGAR;QQEGESR;QVVESAYEVIK;RVHPVSTMIK;SADTLWGIQK;TLHPDLGTDK;TLHPDLGTDKDK;TLHPDLGTDKDKEQWK;VHPVSTMIK;VIGSGCNLDS…
3.20587	3.04432	2.8141	2.95325	3.39115	3.04102	-0.107044	0.240384	23	19	54.861	P00352	ALDH1A1	Aldehyde dehydrogenase 1A1		ANNTFYGLSAGVFTK;EAGFPPGVVNIVPGYGPTAGAAISSHMDIDK;EEIFGPVQQIMK;ELGEYGFHEYTEVK;GYFVQPTVFSNVTDEMR;IAKEEIFGPVQQIMK;IFINNEWHDSVSGK;ILDLIESGK;ILDLIESGKK;LADLIER;LADLIERDR;LLLATMESMNGGK;QAFQIGSPWR;RVTLELGGK;SLDDVIK;SLDDVIKR;SSSGTPDLPVLLTDLK;TIPIDGNFFTYTR;TMDASER;VAFTGSTEVGK;VTLELGGK;YILGNPLTPGVTQGPQIDK;YILGNPLTPGVTQGPQIDKEQYDK
3.9279	3.89143	3.94813	3.95175	4.07312	3.98357	-0.0803251	0.940559	29	29	61.397	P00367;P49448	GLUD1;GLUD2	Glutamate dehydrogenase 1, mitochondrial;Glutamate dehydrogenase 2, mitochondrial		AKPYEGSILEADCDILIPAASEK;ALASLMTYK;DDGSWEVIEGYR;DIVHSGLAYTMER;DSNYHLLMSVQESLER;EDDPNFFK;ELEDFKLQHGSILGFPK;ESEEQKR;FTMELAK;GASIVEDK;GASIVEDKLVEDLR;GFIGPGIDVPAPDMSTGER;HGGTIPIVPTAEFQDR;IIAEGANGPTTPEADK;IIAEGANGPTTPEADKIFLER;ISGASEK;ISGASEKDIVHSGLAYTMER;KGFIGPGIDVPAPDMSTGER;LQHGSILGFPK;MVEGFFDR;NLNHVSYGR;NYTDNELEK;RDDGSWEVIEGYR;RFTMELAK;TAAYVNAIEK;TFVVQGFGNVGLHSMR;VYNEAGVTFT;YNLGLDLR;YSTDVSVDEVK
-4.88682	-4.95429	-4.63223	-5.02759	-4.05851	-4.22461	-0.387544	0.543913	1	1	21.452	P00374	DHFR	Dihydrofolate reductase		LLPEYPGVLSDVQEEK
2.70707	2.66609	2.78196	2.97075	2.90799	2.86676	-0.196795	1.90864	17	17	34.234	P00387	CYB5R3	NADH-cytochrome b5 reductase 3		APEAWDYGQGFVNEEMIR;DILLRPELEELR;EIISHDTR;EIISHDTRR;FAIRPDK;FALPSPQHILGLPVGQHIYLSAR;GFVDLVIK;GPSGLLVYQGK;IDGNLVVRPYTPISSDDDK;IDGNLVVRPYTPISSDDDKGFVDLVIK;LIDREIISHDTR;LIDREIISHDTRR;LWYTLDR;MSQYLESMQIGDTIEFR;STPAITLESPDIK;STPAITLESPDIKYPLR;SVGMIAGGTGITPMLQVIR
3.12113	3.07544	3.0417	3.10721	3.1621	3.0312	-0.0207459	0.17749	19	19	56.256	P00390	GSR	Glutathione reductase, mitochondrial		AAELGAR;AAVVESHK;ADFDNTVAIHPTSSEELVTLR;ALLTPVAIAAGR;EDSKLDYNNIPTVVFSHPPIGTVGLTEDEAIHK;GHAAFTSDPKPTIEVSGK;GHIIVDEFQNTNVK;GIYAVGDVCGK;KTLSGLEVSMVTAVPGR;LDYNNIPTVVFSHPPIGTVGLTEDEAIHK;LFEYKEDSK;LGIQTDDK;LGIQTDDKGHIIVDEFQNTNVK;LNAIYQNNLTK;QEPQPQGPPPAAGAVASYDYLVIGGGSGGLASAR;SHIEIIR;TLSGLEVSMVTAVPGR;TYSTSFTPMYHAVTK;YGIENVK
0.638994	0.545008	0.496284	0.581047	0.596299	0.500542	0.000799497	0.00510124	5	5	25.565	P00403	MT-CO2	Cytochrome c oxidase subunit 2		IFEMGPVFTL;ILYMTDEVNDPSLTIK;LLDVDNR;MMITSQDVLHSWAVPTLGLK;VVLPIEAPIR
-1.42556	-1.20558	-1.41748	-1.54942	-1.08685	-1.75011	0.112587	0.208346	2	2	51.861	P00439	PAH	Phenylalanine-4-hydroxylase		VEYMEEEK;VEYMEEEKK
3.47825	3.30728	3.2409	3.42997	3.53741	3.44916	-0.130033	0.766851	11	11	15.936	P00441	SOD1	Superoxide dismutase [Cu-Zn]		ADDLGKGGNEESTK;ESNGPVK;GDGPVQGIINFEQK;GGNEESTK;GLTEGLHGFHVHEFGDNTAGCTSAGPHFNPLSR;HGGPKDEER;HVGDLGNVTADK;HVGDLGNVTADKDGVADVSIEDSVISLSGDHCIIGR;KHGGPKDEER;LACGVIGIAQ;TLVVHEK
2.2999	2.22628	2.21683	2.04928	2.17213	2.24304	0.0928558	0.675907	24	21	122.22	P00450	CP	Ceruloplasmin		AEEEHLGILGPQLHADVGDK;ALYLQYTDETFR;DIASGLIGPLIICK;DIFTGLIGPMK;DSLDKEK;EVGPTNADPVCLAK;EYTDASFTNR;GAYPLSIEPIGVR;GEFYIGSK;GPEEEHLGILGPVIWAEVGDTIR;GVYSSDVFDIFPGTYQTLEMFPR;HYYIGIIETTWDYASDHGEK;IYHSHIDAPK;KAEEEHLGILGPQLHADVGDK;LISVDTEHSNIYLQNGPDR;MFTTAPDQVDKEDEDFQESNK;QKDVDKEFYLFPTVFDENESLLLEDNIR;QSEDSTFYLGER;QYTDSTFR;SVPPSASHVAPTETFTYEWTVPK;TTIEKPVWLGFLGPIIK;TYSDHPEK;VDKDNEDFQESNR;VNKDDEEFIESNK
-3.13493	-3.0552	-2.73538	-2.99499	-3.03056	-3.33415	0.144731	0.372545	2	2	83.267	P00488	F13A1	Coagulation factor XIII A chain		ETFDVTLEPLSFK;GTYIPVPIVSELQSGK
1.7487	1.69663	1.7249	1.64035	1.93349	1.77792	-0.0605135	0.283617	14	14	32.118	P00491	PNP	Purine nucleoside phosphorylase		ANHEEVLAAGK;DHINLPGFSGQNPLR;DHINLPGFSGQNPLRGPNDER;FEVGDIMLIR;FGDRFPAMSDAYDR;FHMYEGYPLWK;FPAMSDAYDR;LGADAVGMSTVPEVIVAR;LTQAQIFDYGEIPNFPR;NTAEWLLSHTK;STVPGHAGR;VFGFSLITNK;VFHLLGVDTLVVTNAAGGLNPK;VIMDYESLEK
2.87805	2.77773	2.79975	2.76743	2.802	2.86117	0.00831191	0.0710864	10	9	24.579	P00492	HPRT1	Hypoxanthine-guanine phosphoribosyltransferase		DLNHVCVISETGK;FFADLLDYIK;FVVGYALDYNEYFR;NVLIVEDIIDTGK;SIPMTVDFIR;SVGYKPDFVGFEIPDK;TMQTLLSLVR;VASLLVK;VFIPHGLIMDR;VIGGDDLSTLTGK
3.70139	3.62331	3.66905	3.7673	3.78572	3.78657	-0.115277	2.09582	23	23	47.517	P00505	GOT2	Aspartate aminotransferase, mitochondrial		AEAQIAAK;ASAELALGENSEVLK;DADEAKR;DAGMQLQGYR;DDNGKPYVLPSVR;EFSIYMTK;EIATVVK;FVTVQTISGTGALR;IAAAILNTPDLR;IAAAILNTPDLRK;IGASFLQR;IPEQSVLLLHACAHNPTGVDPRPEQWK;ISVAGVTSSNVGYLAHAIHQVTK;KAEAQIAAK;KMNLGVGAYR;KQWLQEVK;MNLGVGAYR;NLDKEYLPIGGLAEFCK;NMGLYGER;QWLQEVK;RVESQLK;TCGFDFTGAVEDISK;TQLVSNLK
-3.13648	-3.06187	-2.88514	-3.05591	-2.98796	-3.22729	0.0625566	0.239063	4	4	122.87	P00519	ABL1	Tyrosine-protein kinase ABL1		GAVSTLLQAPELPTK;GQGESDPLDHEPAVSPLLPR;GSALGTPAAAEPVTPTSK;TNLFSALIK
0.362793	0.208706	0.272438	0.312172	0.386449	0.289404	-0.0480293	0.377096	9	8	134.28	P00533	EGFR	Epidermal growth factor receptor		EISDGDVIISGNK;ELVEPLTPSGEAPNQALLR;GDSFTHTPPLDPQELDILK;GLWIPEGEK;IPLENLQIIR;LLGAEEK;LTQLGTFEDHFLSLQR;NLQEILHGAVR;VLGSGAFGTVYK
6.94414	6.92786	6.9359	6.99313	7.12333	6.94065	-0.0830647	0.69422	38	32	44.614	P00558	PGK1	Phosphoglycerate kinase 1		AAVPSIK;ACANPAAGSVILLENLR;AEPAKIEAFR;AGGFLMK;AHSSMVGVNLPQK;ALESPERPFLAILGGAK;ALMDEVVK;DCVGPEVEK;ELNYFAK;FCLDNGAK;FHVEEEGK;FHVEEEGKGK;GKDASGNK;IQLINNMLDK;ITLPVDFVTADK;ITLPVDFVTADKFDENAK;KELNYFAK;KYAEAVTR;LGDVYVNDAFGTAHR;LTLDKLDVK;NNQITNNQR;QIVWNGPVGVFEWEAFAR;SLLGKDVLFLK;SLSNKLTLDKLDVK;SVVLMSHLGRPDGVPMPDK;SVVLMSHLGRPDGVPMPDKYSLEPVAVELK;TGQATVASGIPAGWMGLDCGPESSK;TGQATVASGIPAGWMGLDCGPESSKK;VADKIQLINN…
4.10215	4.04447	4.12426	4.22098	4.17346	4.07314	-0.0655661	0.589942	16	15	21.635	P00568	AK1	Adenylate kinase isoenzyme 1		ATEPVIAFYEK;EVQQGEEFER;EVQQGEEFERR;GFLIDGYPR;GQLVPLETVLDMLR;IGQPTLLLYVDAGPETMTQR;IIFVVGGPGSGK;KLSEIMEK;KVNAEGSVDSVFSQVCTHLDALK;LSEIMEK;RGETSGR;RLETYYK;SEVSSGSAR;VDDNEETIK;VDDNEETIKK;YGYTHLSTGDLLR
-2.6377	-2.75717	-3.04667	-3.02505	-2.68818	-2.97216	0.0812864	0.194719	3	3	80.118	P00736	C1R	Complement C1r subcomponent;Complement C1r subcomponent heavy chain;Complement C1r subcomponent light chain		GYGFYTK;TLDEFTIIQNLQPQYQFR;VLNYVDWIK
1.26683	1.26169	1.19988	1.15979	1.41915	1.24053	-0.0303583	0.141297	11	11	40.764	P00813	ADA	Adenosine deaminase		AQTPAFDKPK;DMGFTEEEFKR;EAVDILK;EGVVYVEVR;ELLDLLYK;IAYEFVEMK;LGHGYHTLEDQALYNR;LKNDQANYSLNTDDPLIFK;SSFLPEDEKR;STLDTDYQMTK;TVHAGEVGSAEVVK
5.06991	5.16409	5.33737	5.49925	5.33536	5.25885	-0.174029	0.75728	17	17	29.246	P00918	CA2	Carbonic anhydrase 2		AVQQPDGLAVLGIFLK;EPISVSSEQVLK;GGPLDGTYR;HNGPEHWHK;ILNNGHAFNVEFDDSQDK;ILNNGHAFNVEFDDSQDKAVLK;KLNFNGEGEPEELMVDNWRPAQPLK;KYAAELHLVHWNTK;LIQFHFHWGSLDGQGSEHTVDK;LNFNGEGEPEELMVDNWRPAQPLK;QSPVDIDTHTAK;SADFTNFDPR;SHHWGYGK;VGSAKPGLQK;VVDVLDSIK;YAAELHLVHWNTK;YDPSLKPLSVSYDQATSLR
2.83596	2.84969	2.65632	2.59204	2.9787	2.88659	-0.0384544	0.104795	18	18	46.53	P00966	ASS1	Argininosuccinate synthase		APNTPDILEIEFK;APNTPDILEIEFKK;DGTTHQTSLELFMYLNEVAGK;EDFEEAR;EFVEEFIWPAIQSSALYEDR;EQGYDVIAYLANIGQK;EQGYDVIAYLANIGQKEDFEEAR;GIYETPAGTILYHAHLDIEAFTMDR;GQVYILGR;GRNDLMEYAK;IDIVENR;KVFIEDVSR;NDLMEYAK;NQAPPGLYTK;QHGIPIPVTPK;VFIEDVSR;VQVSVLK;YVSHGATGK
-0.781071	-1.03674	-1.22273	-1.51763	-1.07137	-1.13588	0.228112	0.531208	15	8	163.29	P01023;P20742	A2M	Alpha-2-macroglobulin		ATVLNYLPK;DTVIKPLLVEPEGLEK;GEAFTLK;GPTQEFK;GPTQEFKK;GVPIPNK;LLIYAVLPTGDVIGDSAK;LPPNVVEESAR;LVHVEEPHTETVR;MVSGFIPLKPTVK;QFSFPLSSEPFQGSYK;QTVSWAVTPK;SASNMAIVDVK;SLNEEAVK;TEHPFTVEEFVLPK
-1.61885	-1.50531	-1.11552	-1.26706	-1.08422	-1.57782	-0.103531	0.188796	2	2	15.799	P01034	CST3	Cystatin-C		ALDFAVGEYNK;LVGGPMDASVEEEGVRR
2.09001	2.03361	2.05892	2.14182	2.14141	2.13143	-0.0773726	2.01298	9	2	21.229	P01111	NRAS	GTPase NRas		DSDDVPMVLVGNK;LVVVGAGGVGK;QAHELAK;QGVEDAFYTLVR;SALTIQLIQNHFVDEYDPTIEDSYR;SALTIQLIQNHFVDEYDPTIEDSYRK;SFADINLYR;SYGIPFIETSAK;VKDSDDVPMVLVGNK
-1.34896	-1.33097	-1.40295	-1.36942	-1.17409	-1.29979	-0.0798623	0.582798	9	2	21.298	P01112	HRAS	GTPase HRas;GTPase HRas, N-terminally processed		DSDDVPMVLVGNK;LVVVGAGGVGK;QAQDLAR;QGVEDAFYTLVR;SALTIQLIQNHFVDEYDPTIEDSYR;SALTIQLIQNHFVDEYDPTIEDSYRK;SFEDIHQYR;SYGIPYIETSAK;VKDSDDVPMVLVGNK
-0.50868	-0.420542	-0.356781	-0.482361	-0.305619	-0.618393	0.0401233	0.148364	8	3	21.656	P01116	KRAS	GTPase KRas;GTPase KRas, N-terminally processed		DSEDVPMVLVGNK;LVVVGAGGVGK;QAQDLAR;SALTIQLIQNHFVDEYDPTIEDSYR;SALTIQLIQNHFVDEYDPTIEDSYRK;SFEDIHHYR;SYGIPFIETSAK;VKDSEDVPMVLVGNK
-3.16558	-3.10265	-2.44705	-2.93197	-2.85663	-3.26026	0.111194	0.15987	2	2	43.911	P01857	IGHG1	Immunoglobulin heavy constant gamma 1		FNWYVDGVEVHNAK;GPSVFPLAPSSK
-0.221161	-0.316936	-0.333868	-0.410059	-0.000380516	-0.10276	-0.119589	0.394642	5	2	40.46	P01889;P13747	HLA-B	HLA class I histocompatibility antigen, B alpha chain		APWIEQEGPEYWDR;DGEDQTQDTELVETRPAGDR;FDSDAASPR;FISVGYVDDTQFVR;WAAVVVPSGEEQR
-0.816536	-0.751076	-0.931627	-1.35872	-0.219298	-0.191641	-0.243194	0.248034	4	4	17.184	P02144	MB	Myoglobin		GHPETLEK;HGATVLTALGGILK;HPGDFGADAQGAMNK;VEADIPGHGQEVLIR
3.12225	2.81934	2.75057	3.0893	2.94923	3.34589	-0.230753	0.639261	31	29	138.91	P02452;CON__Q862S4	COL1A1	Collagen alpha-1(I) chain		ALLLQGSNEIEIR;DGEAGAQGPPGPAGPAGER;DRDLEVDTTLK;GAAGEPGK;GADGSPGK;GDAGPAGPK;GDKGETGEQGDR;GDRGDAGPK;GEAGPQGPR;GEPGDAGAK;GEPGPVGVQGPPGPAGEEGK;GESGPSGPAGPTGAR;GETGEQGDR;GETGPAGPAGPVGPVGAR;GFPGADGVAGPK;GFPGLPGPSGEPGK;GFSGLDGAK;GPAGPQGPR;GPPGPMGPPGLAGPPGESGR;GPPGSAGAPGK;GPSGPQGPGGPPGPK;GQAGVMGFPGPK;GSEGPQGVR;GSPGADGPAGAPGTPGPQGIAGQR;GSPGPAGPK;GVPGPPGAVGPAGK;GVQGPPGPAGPR;QGPSGASGER;SGDRGETGPAGPAGPVGPVGAR…
4.83865	4.87645	4.8191	4.91722	4.92689	4.72546	-0.0117947	0.0603881	33	30	141.78	P02458	COL2A1	Collagen alpha-1(II) chain;Collagen alpha-1(II) chain;Chondrocalcin		AGGAQLGVMQGPMGPMGPR;DGAAGVK;DGAAGVKGDR;DGETGAAGPPGPAGPAGER;GAAGIAGPK;GANGEPGK;GDKGEAGEPGER;GDRGDVGEK;GDRGDVGEKGPEGAPGK;GDVGEKGPEGAPGK;GEAGAPGVK;GEAGAQGPMGPSGPAGAR;GEAGPTGAR;GEPGDDGPSGAEGPPGPQGLAGQR;GEPGGVGPIGPPGER;GEPGPAGPQGAPGPAGEEGK;GEPGPAGPQGAPGPAGEEGKR;GEQGEAGQK;GFPGLPGPSGEPGK;GIQGPQGPR;GLPGAPGLR;GPEGAPGK;GPEGAQGPR;GPPGPQGPAGEQGPR;GPPGPVGPSGK;GPSGLAGPK;KNWWSSK;QGAPGASGDR;QGDRGEAGAQGPMGPSGPAGA…
3.02095	2.938	2.73425	2.81594	3.5725	2.84927	-0.181509	0.279656	9	9	19.909	P02489	CRYAA	Alpha-crystallin A chain;Alpha-crystallin A(1-172);Alpha-crystallin A(1-168);Alpha-crystallin A(1-162)		EEKPTSAPSS;FVIFLDVK;HFSPEDLTVK;IQTGLDATHAER;MDVTIQHPWFK;QDDHGYISR;TLGPFYPSR;TVLDSGISEVR;VQDDFVEIHGK
2.74593	2.6999	2.63799	2.37548	2.97666	2.57109	0.0535301	0.107506	12	12	20.159	P02511	CRYAB	Alpha-crystallin B chain		APSWFDTGLSEMR;DRFSVNLDVK;EEKPAVTAAPK;HEERQDEHGFISR;HFSPEELK;IPADVDPLTITSSLSSDGVLTVNGPR;KQVSGPER;MDIAIHHPWIR;QDEHGFISR;QVSGPER;VLGDVIEVHGK;VLGDVIEVHGKHEER
4.43453	4.2504	4.15808	4.19095	4.329	4.28863	0.0114756	0.042997	46	44	74.139	P02545;REV__Q5VX52	LMNA	Prelamin-A/C;Lamin-A/C		AAYEAELGDAR;AGQVVTIWAAGAGATHSPPTDLVWK;AQHEDQVEQYK;AQHEDQVEQYKK;ASASGSGAQVGGPISSGSSASSVTVTR;ASSHSSQTQGGGSVTK;DLEALLNSK;DLEDSLAR;EAALSTALSEK;EAALSTALSEKR;EELDFQK;EGDLIAAQAR;IDSLSAQLSQLQK;ITESEEVVSR;KLLEGEEER;KQLQDEMLR;KTLDSVAK;LADALQELR;LALDMEIHAYR;LAVYIDR;LEAALGEAK;LKDLEALLNSK;LLEGEEER;LQEKEDLQELNDR;LQLELSK;LQTMKEELDFQK;LRDLEDSLAR;LSPSPTSQR;LVEIDNGK;METPSQR;MQQQLDEYQELLDIK;NIYSEELR;NSNLVGAAHEELQQS…
4.06369	3.80983	3.744	3.7221	3.91913	3.69606	0.0934127	0.318211	23	19	36.154	P02649	APOE	Apolipoprotein E		AATVGSLAGQPLQER;AKLEEQAQQIR;ALMDETMK;AYKSELEEQLTPVAEETR;DADDLQK;DRLDEVK;DRLDEVKEQVAEVR;ELQAAQAR;EQVAEVR;GEVQAMLGQSTEELR;LAVYQAGAR;LEEQAQQIR;LGPLVEQGR;LQAEAFQAR;MEEMGSR;QQTEWQSGQR;QWAGLVEK;SELEEQLTPVAEETR;SWFEPLVEDMQR;VEQAVETEPEPELR;VQAAVGTSAAPVPSDNH;WELALGR;WVQTLSEQVQEELLSSQVTQELR
-3.14618	-2.98358	-2.85299	-2.91571	-3.19292	-3.19997	0.108617	0.358233	1	1	10.852	P02656	APOC3	Apolipoprotein C-III		DALSSVQESQVAQQAR
1.16257	1.08295	1.25224	1.04424	1.24933	0.992737	0.0704838	0.31161	28	28	272.32	P02751	FN1	Fibronectin;Anastellin;Ugl-Y1;Ugl-Y2;Ugl-Y3		AQITGYR;ATITGYR;DAPIVNK;DLQFVEVTDVK;DTLTSRPAQGVVTTLENVSPPR;EESPLLIGQQSTVSDVPR;ESKPLTAQQTTK;FLATTPNSLLVSWQPPR;GLAFTDVDVDSIK;GLKPGVVYEGQLISIQQYGHQEVTR;ITGYIIK;ITYGETGGNSPVQEFTVPGSK;IYLYTLNDNAR;LGVRPSQGGEAPR;NLQPASEYTVSLVAIK;QYNVGPSVSK;RPGGEPSPEGTTGQSYNQYSQR;SSPVVIDASTAIDAPSNLR;STTPDITGYR;SYTITGLQPGTDYK;TYHVGEQWQK;VDVIPVNLPGEHGQR;VFAVSHGR;VGDTYERPK;VPGTSTSATLTGLTR;VTWAPPPSIDLTNFLVR;WLPSSSPVTGYR;YEVS…
-3.69296	-3.64824	-2.50267	-3.11648	-3.98545	-3.72263	0.326895	0.28203	1	1	23.01	P02753	RBP4	Retinol-binding protein 4;Plasma retinol-binding protein(1-182);Plasma retinol-binding protein(1-181);Plasma retinol-binding protein(1-179);Plasma retinol-binding protein(1-176)		YWGVASFLQK
-0.724903	-0.406652	-0.19371	-0.071579	0.0473757	-0.263165	-0.345966	0.902198	3	3	15.887	P02766	TTR	Transthyretin		AADDTWEPFASGK;ASHRLLLLCLAGLVFVSEAGPTGTGESK;KAADDTWEPFASGK
2.51874	2.46178	2.5085	2.45677	2.61546	2.51535	-0.0328569	0.264879	31	31	84.87	P02786;Q9UP52	TFRC	Transferrin receptor protein 1;Transferrin receptor protein 1, serum form		AAAEVAGQFVIK;AATVTGK;AFTYINLDK;AVLGTSNFK;DAWGPGAAK;DENLALYVENQFR;DSAQNSVIIVDK;EAGSQKDENLALYVENQFR;GFVEPDHYVVVGAQR;HPVTGQFLYQDSNWASK;HVFWGSGSHTLPALLENLK;ILNIFGVIK;LAQMFSDMVLK;LAVDEEENADNNTK;LDSTDFTGTIK;LLNENSYVPR;LTHDVELNLDYER;LTTDFGNAEK;LTVSNVLK;LVHANFGTK;LVYLVENPGGYVAYSK;LYWDDLK;LYWDDLKR;MVTSESK;QVDGDNSHVEMK;SAFSNLFGGEPLSYTR;SGVGTALLLK;SSGLPNIPVQTISR;VEYHFLSPYVSPK;VSASPLLYTLIEK;YNSQLLSFVR
4.38643	4.29436	5.51643	4.95224	4.3143	4.31586	0.204939	0.173814	37	35	77.049	P02787	TF	Serotransferrin		ADRDQYELLCLDNTR;APNHAVVTR;ASYLDCIR;AVGNLRK;DDTVCLAK;DGAGDVAFVK;DKEACVHK;DLLFRDDTVCLAK;DSAHGFLK;DSGFQMNQLR;EDLIWELLNQAQEHFGK;EDLIWELLNQAQEHFGKDK;EDPQTFYYAVAVVK;EFQLFSSPHGK;EGYYGYTGAFR;FDEFFSEGCAPGSK;GDVAFVK;HQTVPQNTGGK;HSTIFENLANK;IMNGEADAMSLDGGFVYIAGK;KDSGFQMNQLR;KPVEEYANCHLAR;KSASDLTWDNLK;LHDRNTYEK;MYLGYEYVTAIR;NLNEKDYELLCLDGTR;NPDPWAK;SAGWNIPIGLLYCDLPEPR;SASDLTWDNLK;SCHTAVGR;SCHTGLGR;SDNCEDTPEA…
0.72846	0.63319	1.93455	1.23508	0.492797	0.312233	0.418696	0.343183	12	12	51.676	P02790	HPX	Hemopexin		EWFWDLATGTMK;FDPVRGEVPPR;GGYTLVSGYPK;LHIMAGR;LLQDEFPGIPSPLDAAVECHR;LWWLDLK;NFPSPVDAAFR;QGHNSVFLIK;RLWWLDLK;SGAQATWTELPWPHEK;VWVYPPEK;VWVYPPEKK
4.01176	3.84729	3.70028	3.73067	3.84954	3.61308	0.122013	0.467569	12	12	20.019	P02792	FTL	Ferritin light chain		AAMALEK;ALFQDIK;ELAEEKR;ELAEEKREGYER;KLNQALLDLHALGSAR;KMGDHLTNLHR;KPAEDEWGK;KPAEDEWGKTPDAMK;LGGPEAGLGEYLFER;LNQALLDLHALGSAR;MGDHLTNLHR;TDPHLCDFLETHFLDEEVK
2.89478	2.84248	2.71384	2.57323	2.79175	2.60001	0.16204	0.862994	16	16	21.225	P02794	FTH1	Ferritin heavy chain;Ferritin heavy chain, N-terminally processed		AIKELGDHVTNLR;AIKELGDHVTNLRK;ELGDHVTNLR;ELGDHVTNLRK;HTLGDSDNES;IFLQDIK;KMGAPESGLAEYLFDK;KMGAPESGLAEYLFDKHTLGDSDNES;LATDKNDPHLCDFIETHYLNEQVK;MGAPESGLAEYLFDK;MGAPESGLAEYLFDKHTLGDSDNES;NVNQSLLELHK;QNYHQDSEAAINR;TTASTSQVR;YFLHQSHEER;YFLHQSHEEREHAEK
-4.23067	-4.02857	-4.1291	-4.09233	-3.9247	-4.27823	-0.0310291	0.0942484	1	1	35.66	P03886	MT-ND1	NADH-ubiquinone oxidoreductase chain 1		GPNVVGPYGLLQPFADAMK
-2.97141	-3.16401	-3.11217	-3.07321	-3.22983	-2.99465	0.0166998	0.0646279	3	3	67.026	P03915	MT-ND5	NADH-ubiquinone oxidoreductase chain 5		ADANTAAIQAILYNR;FPTLTNINENNPTLLNPIK;FPTLTNINENNPTLLNPIKR
-0.488836	-0.718803	-0.592108	-0.349825	-0.3373	0.0769806	-0.396534	1.20088	1	1	7.9916	P03928	MT-ATP8	ATP synthase protein 8		NYNKPWEPK
0.761684	0.785492	0.675453	0.824453	0.97132	0.874861	-0.149335	1.28412	7	7	40.584	P04001;P0DN78;P0DN77;P04000	OPN1MW;OPN1MW3;OPN1MW2;OPN1LW	Medium-wave-sensitive opsin 1;Medium-wave-sensitive opsin 3;Medium-wave-sensitive opsin 2;Long-wave-sensitive opsin 1		ESESTQK;GPFEGPNYHIAPR;KVDDGSELSSASK;SATIYNPVIYVFMNR;TEVSSVSSVSPA;VDDGSELSSASK;YWPHGLK
1.60259	1.60345	1.52708	1.40658	1.58107	1.39767	0.115938	0.828805	6	4	54.305	P04004	VTN	Vitronectin;Vitronectin V65 subunit;Vitronectin V10 subunit;Somatomedin-B		AVRPGYPK;DVWGIEGPIDAAFTR;DWHGVPGQVDAAMAGR;FEDGVLDPDYPR;QPQFISR;RVDTVDPPYPR
1.9176	1.92207	1.95339	1.94765	2.12736	2.01384	-0.0986013	0.853735	24	24	59.755	P04040	CAT	Catalase		ADVLTTGAGNPVGDK;ADVLTTGAGNPVGDKLNVITVGPR;AFYVNVLNEEQR;DAQIFIQK;DLFNAIATGK;DPASDQMQHWK;DPILFPSFIHSQK;DYPLIPVGK;FNTANDDNVTQVR;FSTVAGESGSADTVR;FSTVAGESGSADTVRDPR;FYTEDGNWDLVGNNTPIFFIR;GAGAFGYFEVTHDITK;GIPDGHR;GPLLVQDVVFTDEMAHFDR;GPLLVQDVVFTDEMAHFDRER;LFAYPDTHR;LNVITVGPR;LSQEDPDYGIR;NFTEVHPDYGSHIQALLDK;NLSVEDAAR;RFNTANDDNVTQVR;VFEHIGK;VWPHKDYPLIPVGK
-2.0724	-1.87436	-2.08061	-2.05532	-1.76898	-2.10111	-0.0339899	0.0983356	9	3	73.051	P04049	RAF1	RAF proto-oncogene serine/threonine-protein kinase		DQIIFMVGR;GYASPDLSK;HLHVQETK;IGDFGLATVK;IGSGSFGTVYK;QTAQGMDYLHAK;SNNIFLHEGLTVK;VVDPTPEQFQAFR;WHGDVAVK
2.97647	2.87425	2.92724	2.93027	2.94273	2.85291	0.0173508	0.159787	15	15	59.716	P04062	GBA1	Lysosomal acid glucosylceramidase		ATLGETHR;DVPLTIK;FIPEGSQR;FLDAYAEHK;FWEQSVR;GFGGAMTDAAALNILALSPPAQNLLLK;GQPGDIYHQTWAR;LLLPHWAK;LLMLDDQR;NDLDAVALMHPDGSAVVVVLNR;NFVDSPIIVDITK;QPMFYHLGHFSK;SYFSEEGIGYNIIR;VGLVASQK;VVLTDPEAAK
2.28806	2.17483	2.22222	2.2363	2.20099	2.22164	0.0087258	0.0903241	9	9	53.688	P04066	FUCA1	Tissue alpha-L-fucosidase		DGLIVPIFQER;DLVGELGTALR;DNYPPGFSYADFGPQFTAR;FFHPEEWADLFQAAGAK;ITMLGIQGDLK;TQHFVSAK;WSTDPDK;YTPDWPSLDSRPLPAWFDEAK;YVVLTTK
5.42	5.40903	5.42014	5.42912	5.54118	5.45197	-0.0576989	0.773028	29	24	39.42	P04075	ALDOA	Fructose-bisphosphate aldolase A		AAQEEYVK;AAQEEYVKR;ADDGRPFPQVIK;ALANSLACQGK;ALQASALK;CQYVTEK;DGADFAK;ELSDIAHR;FSHEEIAMATVTALR;FSHEEIAMATVTALRR;GGVVGIK;GGVVGIKVDK;GILAADESTGSIAK;GVVPLAGTNGETTTQGLDGLSER;IGEHTPSALAIMENANVLAR;KDGADFAK;KELSDIAHR;LQSIGTENTEENR;LQSIGTENTEENRR;PYQYPALTPEQK;QLLLTADDR;RLQSIGTENTEENR;RLQSIGTENTEENRR;TVPPAVTGITFLSGGQSEEEASINLNAINK;VDKGVVPLAGTNGETTTQGLDGLSER;VLAAVYK;VNPCIGGVILFHETLYQK;YASICQQNGIVPIVEPEILPDG…
2.16056	2.20255	2.1487	2.34596	2.40237	2.41183	-0.216118	2.92495	7	7	11.139	P04080	CSTB	Cystatin-B		AKHDELTYF;HDELTYF;MMCGAPSATQPATAETQHIADQVR;SQLEEKENK;SQVVAGTNYFIK;VFQSLPHENKPLTLSNYQTNK;VHVGDEDFVHLR
3.02172	2.85592	2.55909	2.35676	2.93955	2.74924	0.130393	0.234456	18	18	38.714	P04083	ANXA1	Annexin A1;Annexin Ac2-26		AAYLQETGKPLDETLK;AAYLQETGKPLDETLKK;ALYEAGER;AMVSEFLK;DITSDTSGDFR;GDRSEDFGVNEDLADSDAR;GGPGSAVSPYPTFNPSSDVAALHK;GLGTDEDTLIEILASR;GTDVNVFNTILTTR;GVDEATIIDILTK;GVDEATIIDILTKR;KGTDVNVFNTILTTR;QAWFIENEEQEYVQTVK;SEDFGVNEDLADSDAR;SEIDMNDIK;TPAQFDADELR;VLDLELK;VLDLELKGDIEK
0.672899	0.586617	0.495953	0.591335	0.540418	0.581648	0.0140225	0.0937219	4	4	27.661	P04156	PRNP	Major prion protein		ESQAYYQR;GENFTETDVK;QHTVTTTTK;YPGQGSPGGNR
2.72562	2.59785	2.57436	2.62117	2.70085	2.57452	0.000426292	0.00233048	11	11	24.75	P04179	SOD2	Superoxide dismutase [Mn], mitochondrial		AIWNVINWENVTER;DFGSFDK;DFGSFDKFK;GDVTAQIALQPALK;GELLEAIK;GELLEAIKR;HHAAYVNNLNVTEEK;HHAAYVNNLNVTEEKYQEALAK;NVRPDYLK;RDFGSFDK;YQEALAK
2.52589	2.4963	2.54666	2.56781	2.58588	2.52402	-0.0362838	0.705565	18	18	48.534	P04181	OAT	Ornithine aminotransferase, mitochondrial;Ornithine aminotransferase, hepatic form;Ornithine aminotransferase, renal form		AFYNNVLGEYEEYITK;ALQDPNVAAFMVEPIQGEAGVVVPDPGYLMGVR;EDELRESIEIINK;ESIEIINK;FAPPLVIK;FAPPLVIKEDELR;GIYLWDVEGR;GLLNAIVIK;HQVLFIADEIQTGLAR;IVFAAGNFWGR;KTVQGPPTSDDIFER;KWGYTVK;LPSDVVTAVR;TLSAISSSTDPTSYDGFGPFMPGFDIIPYNDLPALER;TVQGPPTSDDIFER;VAIAALEVLEEENLAENADK;WLAVDYENVRPDIVLLGK;YGAHNYHPLPVALER
-1.60126	-1.46424	-1.414	-1.1532	-1.37758	-1.34797	-0.200251	1.04624	3	3	17.935	P04216	THY1	Thy-1 membrane glycoprotein		HVLFGTVGVPEHTYR;KHVLFGTVGVPEHTYR;VLYLSAFTSK
4.4378	3.61009	3.40055	4.23581	3.35215	3.71602	0.0481539	0.0401862	39	25	66.038	P04264;CON__P04264	KRT1	Keratin, type II cytoskeletal 1		AEAESLYQSK;AQYEDIAQK;DVDGAYMTK;DYQELMNTK;FLEQQNQVLQTK;GENALKDAK;GGGGGGYGSGGSSYGSGGGSYGSGGGGGGGR;GSGGGSSGGSIGGR;GSSSGGVK;IEISELNR;KDVDGAYMTK;KQISNLQQSISDAEQR;LALDLEIATYR;LNDLEDALQQAK;LNDLEDALQQAKEDLAR;LRSEIDNVKK;NKLNDLEDALQQAK;NKYEDEINK;NKYEDEINKR;NMQDMVEDYR;QISNLQQSISDAEQR;QISNLQQSISDAEQRGENALK;SEIDNVK;SEIDNVKK;SGGGFSSGSAGIINYQR;SISISVAR;SKAEAESLYQSK;SLDLDSIIAEVK;SLNNQFASFIDK;SLNNQFASFIDKVR;SLVNL…
-2.99945	-2.99175	-2.96842	-3.10457	-3.02038	-3.13544	0.100259	1.31776	1	1	65.444	Q02383;P04279	SEMG2;SEMG1	Semenogelin-2;Semenogelin-1;Alpha-inhibin-92;Alpha-inhibin-31;Seminal basic protein		QAAVMGQK
2.19714	2.20132	2.26148	2.23155	2.33586	2.11851	-0.00866032	0.0447439	22	3	49.585	P04350	TUBB4A	Tubulin beta-4A chain		ALTVPELTQQMFDAK;AVLVDLEPGTMDSVR;EIVHLQAGQCGNQIGAK;EVDEQMLSVQSK;FPGQLNADLR;FPGQLNADLRK;FWEVISDEHGIDPTGTYHGDSDLQLER;GHYTEGAELVDAVLDVVR;IMNTFSVVPSPK;INVYYNEATGGNYVPR;IREEFPDR;ISEQFTAMFR;KLAVNMVPFPR;LAVNMVPFPR;LHFFMPGFAPLTSR;LTTPTYGDLNHLVSATMSGVTTCLR;MAATFIGNSTAIQELFK;NMMAACDPR;NSSYFVEWIPNNVK;SGPFGQIFRPDNFVFGQSGAGNNWAK;TAVCDIPPR;YLTVAAVFR
7.28119	7.26953	7.3543	7.42093	7.45795	7.32451	-0.0994546	0.974737	30	30	36.053	P04406;O14556	GAPDH	Glyceraldehyde-3-phosphate dehydrogenase		AAFNSGK;AENGKLVINGNPITIFQERDPSK;AGAHLQGGAK;AGAHLQGGAKR;GALQNIIPASTGAAK;GKVKVGVNGFGR;IISNASCTTNCLAPLAK;IKWGDAGAEYVVESTGVFTTMEK;LEKPAKYDDIK;LISWYDNEFGYSNR;LTGMAFR;LVINGNPITIFQER;LVINGNPITIFQERDPSK;QASEGPLK;RVIISAPSADAPMFVMGVNHEK;TVDGPSGK;VDIVAINDPFIDLNYMVYMFQYDSTHGK;VGVNGFGR;VIHDNFGIVEGLMTTVHAITATQK;VIHDNFGIVEGLMTTVHAITATQKTVDGPSGK;VIISAPSADAPMFVMGVNHEK;VIISAPSADAPMFVMGVNHEKYDNSLK;VIPELNGK;VIPELNGK…
-0.284843	-0.362717	-0.105913	-0.325136	-0.205516	-0.25441	0.0105295	0.0429576	10	10	51.657	P04424	ASL	Argininosuccinate lyase		AEMDQILHGLDK;ALLQAQQA;CAGLLMTLKGLPSTYNK;DVLFPGYTHLQR;FVGAVDPIMEK;GLPSTYNK;INVLPLGSGAIAGNPLGVDR;LNSNDEDIHTANER;NPDSLELIR;VAEEWAQGTFK
1.38033	1.28727	1.32559	1.23459	1.39089	1.47842	-0.0369031	0.184593	11	8	40.84	P04439	HLA-A	HLA class I histocompatibility antigen, A alpha chain		APWIEQEGPEYWDQETR;AQSQTDR;AQSQTDRVDLGTLR;DGEDQTQDTELVETRPAGDGTFQK;FDSDAASQR;FIAVGYVDDTQFVR;KWEAAHEAEQLR;QDAYDGKDYIALNEDLR;SWTAADMAAQITK;WAAVVVPSGEEQR;YFFTSVSRPGR
-2.09605	-2.03376	-2.04795	-2.08499	-1.91033	-2.15409	-0.00945441	0.0430183	8	6	137.91	P04626	ERBB2	Receptor tyrosine-protein kinase erbB-2		EIPDLLEK;FVVIQNEDLGPASPLDSTFYR;GIWIPDGENVK;GLQSLPTHDPSPLQR;GTPTAENPEYLGLDVPV;LLDIDETEYHADGGK;LPASPETHLDMLR;VLGSGAFGTVYK
2.35762	2.20877	2.1917	2.30535	2.3429	2.38352	-0.0912218	0.72875	8	8	28.315	P04632;Q96L46	CAPNS1	Calpain small subunit 1		GGGGGGGGGGGLGGGLGNVLGGLISGAGGGGGGGGGGGGGGGGGGGGTAMR;ILGGVISAISEAAAQYNPEPPPPR;LFAQLAGDDMEVSATELMNILNK;LGFEEFK;MFLVNSFLK;SMVAVMDSDTTGK;THYSNIEANESEEVR;YLWNNIK
2.45157	2.21979	1.99125	2.01904	2.52754	2.34324	-0.0757354	0.140651	15	15	22.782	P04792	HSPB1	Heat shock protein beta-1		AQLGGPEAAK;DGVVEITGK;DGVVEITGKHEER;DWYPHSR;GPSWDPFR;GPSWDPFRDWYPHSR;KYTLPPGVDPTQVSSSLSPEGTLTVEAPMPK;LATQSNEITIPVTFESR;LFDQAFGLPR;QDEHGYISR;QLSSGVSEIR;SDETAAK;TKDGVVEITGK;VPFSLLR;VSLDVNHFAPDELTVK
3.77915	3.77027	3.73854	3.80372	4.03304	3.80619	-0.11833	0.700538	35	35	68.569	P04843	RPN1	Dolichyl-diphosphooligosaccharide--protein glycosyltransferase subunit 1		ALTSEIALLQSR;APDELHYTYLDTFGRPVIVAYK;ATSFLLALEPELEAR;DISTLNSGK;DISTLNSGKK;DTYIENEK;DVPAYSQDTFK;FPLFGGWK;FVDHVFDEQVIDSLTVK;GEDEEENNLEVR;HFDETVNR;HTGAVLK;IDHILDAL;IILPEGAK;ISVIVETVYTHVLHPYPTQITQSEK;KDTYIENEK;KSLETEHK;LAHLGVQVK;LAHLGVQVKGEDEEENNLEVR;LPVALDPGAK;NIEIDSPYEISR;NLVEQHIQDIVVHYTFNK;NVESYTK;QFVVFEGNHYFYSPYPTK;QPDSGISSIR;RQELVTK;SAVEAER;SEDLLDYGPFR;SLETEHK;THYIVGYNLPSYEYLYNLGDQYALK;TILPAAAQDV…
2.50356	2.40966	2.42654	2.48201	2.61591	2.57427	-0.110811	1.06284	22	22	69.283	P04844	RPN2	Dolichyl-diphosphooligosaccharide--protein glycosyltransferase subunit 2		EDQVIQLMNAIFSK;EETVLATVQALQTASHLSQQADLR;FELDTSER;FPEEEAPSTVLSQNLFTPK;FSSGYYDFLVEVEGDNR;ISTEVGITNVDLSTVDKDQSIAPK;KNFESLSEAFSVASAAAVLSHNR;LMDHVGTEPSIK;LQVTNVLSQPLTQATVK;LSKEETVLATVQALQTASHLSQQADLR;MLAQQAVK;NFESLSEAFSVASAAAVLSHNR;NPILWNVADVVIK;NVYKFELDTSER;QEIQHLFR;QEIQHLFREPEK;SIVEEIEDLVAR;TGQEVVFVAEPDNK;TGQEVVFVAEPDNKNVYK;TSFTPVGDVFELNFMNVK;YHVPVVVVPEGSASDTHEQAILR;YIANTVELR
1.7895	1.84177	1.915	1.86738	1.84517	1.74151	0.0307347	0.225948	15	8	40.45	P04899	GNAI2	Guanine nucleotide-binding protein G(i) subunit alpha-2		AMGNLQIDFADPSR;AVVYSNTIQSIMAIVK;EIYTHFTCATDTK;EYQLNDSAAYYLNDLER;FEDLNKR;IAQSDYIPTQQDVLR;IIHEDGYSEEECR;KDLFEEK;LLLLGAGESGK;LWADHGVQACFGR;MFDVGGQR;NLREDGEK;NVQFVFDAVTDVIIK;TTGIVETHFTFK;YDEAASYIQSK
3.00282	3.32468	3.11926	3.02993	3.8917	3.17455	-0.216474	0.313066	8	0	14.121	Q7L7L0;P04908	H2AC25;H2AC4	Histone H2A type 3;Histone H2A type 1-B/E		AGLQFPVGR;HLQLAIR;HLQLAIRNDEELNK;KGNYSER;KTESHHK;NDEELNK;NDEELNKLLGR;VTIAQGGVLPNIQAVLLPK
4.53945	4.53869	4.55466	4.58926	4.69551	4.5731	-0.0750259	0.903428	47	30	112.89	P05023	ATP1A1	Sodium/potassium-transporting ATPase subunit alpha-1		AAVPDAVGK;ADIGVAMGIAGSDVSK;AVAGDASESALLK;AVFQANQENLPILK;DAFQNAYLELGGLGER;DGPNALTPPPTTPEWIK;DKYEPAAVSEQGDK;DKYEPAAVSEQGDKK;DMDELKK;DMTSEQLDDILK;DRDMDELKK;EQPLDEELK;EQPLDEELKDAFQNAYLELGGLGER;EVSMDDHK;GGDRIPADLR;GIVVYTGDR;GVGIISEGNETVEDIAAR;IVEIPFNSTNK;KADIGVAMGIAGSDVSK;KYGTDLSR;LIFDNLK;LIFDNLKK;LIIVEGCQR;LNIPVSQVNPR;LSLDELHR;LSLDELHRK;MSINAEEVVVGDLVEVK;MTVAHMWFDNQIHEADTTENQSGVSFDK;NLEAVETLGSTSTICSD…
2.07747	2.00318	1.95547	2.01764	2.06086	2.13201	-0.058128	0.524918	10	10	35.061	P05026	ATP1B1	Sodium/potassium-transporting ATPase subunit beta-1		AKEEGSWK;AYGENIGYSEK;AYGENIGYSEKDR;FIWNSEK;GDFNHER;KFIWNSEK;SYEAYVLNIVR;TEISFRPNDPK;VAPPGLTQIPQIQK;YKDSAQR
3.0056	2.90861	3.1484	2.9344	3.05567	2.95496	0.0391919	0.189651	19	18	86.942	P05067	APP	Amyloid-beta precursor protein;N-APP;Soluble APP-alpha;Soluble APP-beta;C99;Amyloid-beta protein 42;Amyloid-beta protein 40;C83;P3(42);P3(40);C80;Gamma-secretase C-terminal fragment 59;Gamma-secretase C-terminal fragment 57;Gamma-secretase C-terminal fragment 50;C31		AVIQHFQEK;AVIQHFQEKVESLEQEAANER;EQNYSDDVLANMISEPR;EWEEAER;GLTTRPGSGLTNIK;HVFNMLK;ISYGNDALMPSLTETK;LALENYITALQAVPPRPR;LVFFAEDVGSNK;QQLVETHMAR;SQVMTHLR;TEEISEVK;THPHFVIPYR;TTSIATTTTTTTESVEEVVR;VEAMLNDR;VESLEQEAANER;WDSDPSGTK;WYFDVTEGK;YLETPGDENEHAHFQK
-2.69336	-2.52228	-2.53642	-2.80772	-1.89031	-2.65824	-0.131932	0.172532	3	3	34.735	P05089	ARG1	Arginase-1		DVDPGEHYILK;KAGLLEK;TGLLSGLDIMEVNPSLGK
3.58841	3.50458	3.50985	3.56484	3.59154	3.58666	-0.0467329	0.758684	24	19	56.381	P05091	ALDH2	Aldehyde dehydrogenase, mitochondrial		AAFQLGSPWR;ANNSTYGLAAAVFTK;EAGFPPGVVNIVPGFGPTAGAAIASHEDVDK;EEIFGPVMQILK;ELGEYGLQAYTEVK;GYFIQPTVFGDVQDGMTIAK;ILGYINTGK;KILGYINTGK;LADLIER;LADLIERDR;LGPALATGNVVVMK;RVTLELGGK;TEQGPQVDETQFK;TEQGPQVDETQFKK;TFVQEDIYDEFVER;TIEEVVGR;TIPIDGDFFSYTR;VAEQTPLTALYVANLIK;VAFTGSTEIGR;VIQVAAGSSNLK;VIQVAAGSSNLKR;VTLELGGK;VVGNPFDSK;YYAGWADK
2.40248	2.30653	2.4006	2.46535	2.58947	2.64472	-0.196644	1.47586	12	12	10.659	P05114	HMGN1	Non-histone chromosomal protein HMG-14		EDLPAENGETK;EDLPAENGETKTEESPASDEAGEK;EDLPAENGETKTEESPASDEAGEKEAK;KVSSAEGAAK;KVSSAEGAAKEEPK;LSAKPPAK;QAEVANQETK;QAEVANQETKEDLPAENGETK;TEESPASDEAGEK;TEESPASDEAGEKEAK;VSSAEGAAK;VSSAEGAAKEEPK
2.12606	2.02092	2.0287	2.09385	2.20195	2.11548	-0.0785278	0.764445	13	4	32.852	P05141;Q9H0C2	SLC25A5	ADP/ATP translocase 2;ADP/ATP translocase 2, N-terminally processed		AAYFGIYDTAK;DFLAGGVAAAISK;EQGVLSFWR;GAWSNVLR;GMLPDPK;GNLANVIR;LAADVGK;LLLQVQHASK;QIFLGGVDK;QIFLGGVDKR;TAVAPIER;TDAAVSFAK;YFPTQALNFAFK
-2.58539	-2.76989	-2.97006	-2.96623	-2.31771	-2.7353	-0.102036	0.17603	4	3	55.154	P05155	SERPING1	Plasma protease C1 inhibitor		FPVFMGR;KYPVAHFIDQTLK;LEDMEQALSPSVFK;LLDSLPSDTR
-2.81199	-2.93917	-2.71037	-3.00772	-2.79248	-3.03181	0.123497	0.540778	4	4	65.75	P05156	CFI	Complement factor I;Complement factor I heavy chain;Complement factor I light chain		AQLGDLPWQVAIK;HGNTDSEGIVEVK;IVIEYVDR;VFSLQWGEVK
-0.962452	-1.18001	-1.31922	-1.2132	-1.38164	-1.25654	0.1299	0.490195	3	3	17.887	P05161	ISG15	Ubiquitin-like protein ISG15		IGVHAFQQR;LTQTVAHLK;VPLASQGLGPGSTVLLVVDK
2.40526	2.41172	2.36848	2.34843	2.5154	2.31853	0.00102838	0.00537396	26	26	80.058	P05165	PCCA	Propionyl-CoA carboxylase alpha chain, mitochondrial		AEVNTIPGFDGVVK;AMGEQAVALAR;AQAVHPGYGFLSENK;AQHFQENSR;ASAGGGGK;DAEEAVR;EIGYPVMIK;FLSDVYPDGFK;GVTHNIALLR;HIEIQVLGDK;IAWDDEETR;KAEVNTIPGFDGVVK;KAEVNTIPGFDGVVKDAEEAVR;LAAELNK;LITYGSDR;LSQYQEPLHLPGVR;LSSQEAASSFGDDR;MADALDNYVIR;MPVIKPDIANWELSVK;SYLNMDAIMEAIK;TVAIHSDVDASSVHVK;VTEDTSSVLR;VVEEAPSIFLDAETR;VVEEAPSIFLDAETRR;VYAEDPYK;YSSAGTVEFLVDSK
1.28053	1.30158	1.26409	1.24796	1.50097	1.1985	-0.0337439	0.131616	17	17	58.215	P05166	PCCB	Propionyl-CoA carboxylase beta chain, mitochondrial		AYGGAYDVMSSK;AYNMVDIIHSVVDER;DFFNYLPLSSQDPAPVR;DTSYLFITGPDVVK;EFFEIMPNYAK;FANPFPAAVR;GAVEIIFK;GFVDDIIQPSSTR;GHENVEAAQAEYIEK;IMDQAITVGAPVIGLNDSGGAR;IQEGVESLAGYADIFLR;ISLLLDPGSFVESDMFVEHR;LLYAFAEATVPK;LVPELDTIVPLESTK;SVTNEDVTQEELGGAK;TALLGGGQR;TVGIVGNQPK
-3.70281	-3.34813	-3.58356	-3.49323	-3.17809	-3.46112	-0.167357	0.506876	3	3	57.304	P05186;REV__Q86WI3	ALPL	Alkaline phosphatase, tissue-nonspecific isozyme		DIAYQLMHNIR;LDGLDLVDTWK;YALELQK
3.08814	3.00935	2.98637	3.06563	3.2062	3.12147	-0.10315	0.942737	19	19	36.112	P05198	EIF2S1	Eukaryotic translation initiation factor 2 subunit 1		DEQLESLFQR;ENAEVDGDDDAEEMEAK;ENAEVDGDDDAEEMEAKAED;FPEVEDVVMVNVR;GVFNVQMEPK;GYIDLSK;HAVSDPSILDSLDLNEDEREVLINNINR;HVAEVLEYTK;HVAEVLEYTKDEQLESLFQR;INLIAPPR;LERENAEVDGDDDAEEMEAKAED;RPGYGAYDAFK;TAWVFDDK;TAWVFDDKYK;TEGLSVLSQAMAVIK;TVYSILR;VSPEEAIK;VVTDTDETELAR;YVMTTTTLER
3.42201	3.43709	3.47033	3.56155	3.86009	3.54428	-0.212163	0.95977	9	7	9.3926	P05204	HMGN2	Non-histone chromosomal protein HMG-17		AEGAGDAK;AEGDAKGDK;EGNNPAENGDAK;EGNNPAENGDAKTDQAQKAEGAGDAK;KAEGDAK;KAEGDAKGDK;TDQAQKAEGAGDAK;VKDEPQR;VKDEPQRR
-0.925312	-0.875135	-0.709919	-0.650238	-0.868428	-0.978119	-0.00452709	0.0128666	4	4	17.459	P05230	FGF1	Fibroblast growth factor 1		AEGEITTFTALTEK;AILFLPLPVSSD;LEENHYNTYISK;NWFVGLK
-3.16424	-3.13069	-3.11328	-3.19304	-2.84717	-3.29083	-0.0257209	0.0662093	6	6	57.825	P05362	ICAM1	Intercellular adhesion molecule 1		ASVSVTAEDEGTQR;DGTFPLPIGESVTVTR;EPAVGEPAEVTTTVLVR;KVTVNVLSPR;LLGIETPLPK;VELAPLPSWQPVGK
-1.87388	-1.71783	-1.93098	-1.80704	-1.71855	-1.92834	-0.0229222	0.0928614	2	2	11.514	P05386	RPLP1	Large ribosomal subunit protein P1		AAGVNVEPFWPGLFAK;ALANVNIGSLICNVGAGGPAPAAGAAPAGGPAPSTAAAPAEEK
1.0267	1.14374	0.958755	0.982847	1.43815	1.30008	-0.197292	0.609391	6	6	11.665	P05387	RPLP2	Large ribosomal subunit protein P2		ILDSVGIEADDDR;ILDSVGIEADDDRLNK;KILDSVGIEADDDRLNK;LASVPAGGAVAVSAAPGSAAPAAGSAPAAAEEK;NIEDVIAQGIGK;VISELNGK
3.57428	3.48408	3.45362	3.58608	3.65221	3.46079	-0.0623617	0.394248	15	15	34.273	P05388;Q8NHW5	RPLP0;RPLP0P6	Large ribosomal subunit protein uL10;Putative ribosomal protein uL10-like		AFLADPSAFVAAAPVAAATTAAPAAAAAPAK;AGAIAPCEVTVPAQNTGLGPEK;AVVLMGK;DMLLANK;DMLLANKVPAAAR;EDLTEIR;EDLTEIRDMLLANK;EDLTEIRDMLLANKVPAAAR;GHLENNPALEK;GNVGFVFTK;GNVGFVFTKEDLTEIR;GTIEILSDVQLIK;IIQLLDDYPK;TSFFQALGITTK;VLALSVETDYTFPLAEK
-1.47619	-1.21435	-1.41682	-1.64009	-0.622125	-1.14809	-0.23235	0.311725	6	6	14.858	P05413	FABP3	Fatty acid-binding protein, heart		LGVEFDETTADDR;LGVEFDETTADDRK;QVASMTKPTTIIEK;SIVTLDGGK;SLGVGFATR;VDAFLGTWK
-1.98067	-1.9739	-2.00278	-1.9427	-1.92378	-1.92632	-0.0548531	2.1864	5	5	44.395	P05423	POLR3D	DNA-directed RNA polymerase III subunit RPC4		DVSVAELLR;RPAPPLTPGR;TEVQGEDGQVVLIK;VKEEPRDEEEEAK;VQLLLGK
4.63173	4.53466	4.47	4.50381	4.56466	4.47871	0.0297403	0.216258	41	41	46.836	P05455	SSB	Lupus La protein		AAQPGSGK;AELMEISEDK;AELMEISEDKTK;AENGDNEK;AKQEQEAK;AREETDKEEPASK;DANNGNLQLR;EDLHILFSNHGEIK;EETDKEEPASK;EGIILFK;EQIKLDEGWVPLEIMIK;ETDLLILFK;ETDLLILFKDDYFAK;EVTWEVLEGEVEK;EVTWEVLEGEVEKEALK;EVTWEVLEGEVEKEALKK;EWLEDKGQVLNIQMR;FVETPGQK;GFPTDATLDDIK;GFPTDATLDDIKEWLEDK;GKVQFQGK;GQVLNIQMR;GSIFVVFDSIESAK;GSIFVVFDSIESAKK;ICHQIEYYFGDFNLPR;IIEDQQESLNK;KFVETPGQK;KIIEDQQESLNK;KQNKVEAK;LDEGWVPLEIMIK;LEEDAEMK;LT…
3.28712	2.90875	2.86312	3.03844	2.98665	2.85753	0.0587899	0.151561	1	1	14.277	P05496;P48201;Q06055	ATP5MC1;ATP5MC3;ATP5MC2	ATP synthase F(0) complex subunit C1, mitochondrial;ATP synthase F(0) complex subunit C3, mitochondrial;ATP synthase F(0) complex subunit C2, mitochondrial		DIDTAAK
-2.45217	-2.22624	-2.43638	-2.46786	-2.12092	-2.44041	-0.0285304	0.0753604	5	3	48.062	P05549;Q92481	TFAP2A	Transcription factor AP-2-alpha		AANVTLLTSLVEGEAVHLAR;EFTDLLAQDR;GLPHQLSGLDPR;QHSDPNEQVTR;VTVAEVQR
2.12328	2.04989	2.11965	2.13114	2.28368	2.2748	-0.132264	1.13307	15	15	88.414	P05556	ITGB1	Integrin beta-1		DDLENVK;DNTNEIYSGK;GEVFNELVGK;IGFGSFVEK;LKPEDITQIQPQQLVLR;LLVFSTDAGFHFAGDGK;LSEGVTISYK;LSENNIQTIFAVTEEFQPVYK;NVLSLTNK;NVLSLTNKGEVFNELVGK;SAVTTVVNPK;SGEPQTFTLK;SLGTDLMNEMR;TVMPYISTTPAK;WDTGENPIYK
-1.66418	-0.757833	-1.04244	-1.35384	-0.923274	-0.900818	-0.0955057	0.113395	4	2	76.868	P05771	PRKCB	Protein kinase C beta type		KGTDELYAVK;LDNVMLDSEGHIK;LLSQEEGEYFNVPVPPEGSEANEELR;LTDFNFLMVLGK
2.39665	2.00583	1.76049	2.10137	2.40283	2.13286	-0.158027	0.309213	19	11	48.057	P05783;CON__H-INV:HIT000015463	KRT18	Keratin, type I cytoskeletal 18		AQIFANTVDNAR;AQYDELAR;ASLENSLR;DWSHYFK;ETMQSLNDR;IVLQIDNAR;KNHEEEVK;KVIDDTNITR;LAADDFR;LLEDGEDFNLGDALDSSNSMQTIQK;QAQEYEALLNIK;QSVENDIHGLR;QSVENDIHGLRK;SLETENR;SLETENRR;TVQSLEIDLDSMR;VIDDTNITR;VKYETELAMR;VVSETNDTK
0.668911	0.531027	0.267185	0.439047	1.13181	0.588449	-0.230728	0.405598	5	5	25.15	P05813	CRYBA1	Beta-crystallin A3;Beta-crystallin A3, isoform A1, Delta4 form;Beta-crystallin A3, isoform A1, Delta7 form;Beta-crystallin A3, isoform A1, Delta8 form		EWGSHAQTSQIQSIR;ITIYDQENFQGK;MAQTNPTPGSLGPWK;METQAEQQELETLPTTK;WDAWSGSNAYHIER
0.0213299	-0.101854	-0.172466	-0.15798	0.113286	0.105305	-0.104534	0.422261	7	7	30.025	P05937	CALB1	Calbindin		AGLELSPEMK;ELQNLIQELQQAR;KYDTDHSGFIETEELK;LAEYTDLMLK;LFDSNNDGK;LFDSNNDGKLELTEMAR;TFVDQYGQR
-1.19563	-1.04542	-1.3669	-1.31822	-0.567744	-0.541895	-0.393362	0.657089	4	3	21.145	P05976;P08590	MYL1	Myosin light chain 1/3, skeletal muscle isoform		ALGTNPTNAEVR;DQATYEDFVEGLR;HVLATLGEK;VFDKEGNGTVMGAELR
0.295076	0.181618	-0.0547562	0.0554886	0.179078	0.0260735	0.0537659	0.18072	8	6	144.91	P05997	COL5A2	Collagen alpha-2(V) chain		DGAVGER;GDPGSHGR;GEAGPTGAR;GIVGMPGQR;GPEGPQGQR;GPPGPVGPSGK;SGLGSQVGLMPGSVGPVGPR;VGPTGATGDK
0.946913	1.08221	1.0294	1.01004	1.25041	1.03753	-0.0798159	0.393971	6	6	40.786	P06132	UROD	Uroporphyrinogen decarboxylase		EAGLAPVPMIIFAK;FALPYIR;GPSFPEPLREEQDLER;MEANGLGPQGFPELK;QMLDDFGPHR;YIANLGHGLYPDMDPEHVGAFVDAVHK
-1.66587	-1.60013	-1.5499	-1.61973	-1.32908	-1.66538	-0.0672363	0.239669	10	5	60.761	P06241;P06239;P09769	FYN	Tyrosine-protein kinase Fyn		AQFETLQQLVQHYSER;EVLEQVER;FQILNSSEGDWWEAR;GAYSLSIR;GSLLDFLK;LIEDNEYTAR;SLTTGETGYIPSNYVAPVDSIQAEEWYFGK;TEDDLSFHK;TLKPGTMSPESFLEEAQIMK;WTAPEAALYGR
-0.939579	-0.954819	-0.937887	-0.83532	-0.922744	-0.943911	-0.043437	0.574238	7	7	68.417	P06276	BCHE	Cholinesterase		AILQSGSFNAPWAVTSLYEAR;DEGTAFLVYGAPGFSK;EFQEGLK;IFFPGVSEFGK;KEFQEGLK;NIAAFGGNPK;VLEMTGNIDEAEWEWK
-1.10959	-1.12955	-1.26047	-1.28578	-1.12364	-1.51234	0.140722	0.503322	7	7	48.766	P06280	GLA	Alpha-galactosidase A		ALLQDKDVIAINQDPLGK;HISPQAK;LQADPQR;NFADIDDSWK;QLANYVHSK;SILDWTSFNQER;SYTIAVASLGK
5.14297	5.06186	5.20815	5.33833	5.35017	5.20234	-0.159286	1.17831	40	14	85.696	P06396;REV__Q6TDU7	GSN	Gelsolin		AGALNSNDAFVLK;AGKEPGLQIWR;AMAELAA;ANSAGATR;AQPVQVAEGSEPDGFWEALGGK;AVEVLPK;DPDQTDGLGLSYLSSHIANVER;DSQEEEK;DSQEEEKTEALTSAK;EDAANRK;EGGQTAPASTR;EPAHLMSLFGGKPMIIYK;EPGLQIWR;EVQGFESATFLGYFK;GGVASGFK;GIRDNER;HVVPNEVVVQR;IEGSNKVPVDPATYGQFYGGDSYIILYNYR;KGGVASGFK;KMDAHPPR;MDAHPPR;NWRDPDQTDGLGLSYLSSHIANVER;QANTEER;QANTEERK;QTQVSVLPEGGETPLFK;RTPITVVK;RYIETDPANR;SEDCFILDHGK;SEDCFILDHGKDGK;TASDFITK;TEALTSAK;T…
-0.489374	-0.593201	-0.578426	-0.684114	-0.536386	-0.634985	0.0648279	0.52614	9	9	106.16	P06400	RB1	Retinoblastoma-associated protein		AWLTWEK;DLPHAVQETFK;DLPHAVQETFKR;IPGGNIYISPLK;ISEGLPTPTK;LFLDHDK;RYEEIYLK;TLQTDSIDSFETQR;VIESFIK
1.73456	1.8611	1.56029	1.69774	1.68462	2.01736	-0.0812585	0.228192	7	7	12.203	P06454	PTMA	Prothymosin alpha;Prothymosin alpha, N-terminally processed;Thymosin alpha-1		AAEDDEDDDVDTK;AAEDDEDDDVDTKK;EVVEEAENGR;KEVVEEAENGR;RAAEDDEDDDVDTKK;SDAAVDTSSEITTK;SDAAVDTSSEITTKDLK
5.27624	5.26883	5.34708	5.30336	5.43695	5.26052	-0.0362279	0.243758	31	31	56.559	P06576	ATP5F1B	ATP synthase subunit beta, mitochondrial		ADKLAEEHSS;AGAATGR;AHGGYSVFAGVGER;AIAELGIYPAVDPLDSTSR;DQEGQDVLLFIDNIFR;EGNDLYHEMIESGVINLK;FLSQPFQVAEVFTGHMGK;FTQAGSEVSALLGR;GFQQILAGEYDHLPEQAFYMVGPIEEAVAK;GSITSVQAIYVPADDLTDPAPATTFAHLDATTVLSR;IGLFGGAGVGK;IMDPNIVGSEHYDVAR;IMNVIGEPIDER;IMNVIGEPIDERGPIK;IPSAVGYQPTLATDMGTMQER;IPVGPETLGR;KGSITSVQAIYVPADDLTDPAPATTFAHLDATTVLSR;LAEEHSS;LVLEVAQHLGESTVR;LVPLKETIK;QFAPIHAEAPEFMEMSVEQEILVTGIK;SLQDIIAILGMDELS…
-1.96759	-1.91069	-1.82744	-1.78364	-2.79434	-1.94816	0.273477	0.361243	5	5	13.242	P06702	S100A9	Protein S100-A9		KDLQNFLK;LGHPDTLNQGEFK;LTWASHEK;NIETIINTFHQYSVK;VIEHIMEDLDTNADK
2.17002	2.21162	1.96061	1.93024	2.08466	1.99233	0.111676	0.551183	4	4	10.18	P06703	S100A6	Protein S100-A6		EGDKHTLSK;ELTIGSK;LMEDLDR;LQDAEIAR
1.28974	1.30177	1.20578	1.22647	1.48131	1.24268	-0.0510543	0.227786	8	8	25.097	P06730	EIF4E	Eukaryotic translation initiation factor 4E		ATVEPETTPTPNPPTTEEEK;ATVEPETTPTPNPPTTEEEKTESNQEVANPEHYIK;DGIEPMWEDEK;DGIEPMWEDEKNK;EAVTHIGR;IVIGYQSHADTATK;TESNQEVANPEHYIK;WLITLNK
-0.748638	-0.808012	-1.0961	-1.25337	-0.461511	-0.295168	-0.214233	0.273175	12	11	43.101	P06732	CKM	Creatine kinase M-type		ELFDPIISDR;GGDDLDPNYVLSSR;GIWHNDNK;GQSIDDMIPAQK;GTGGVDTAAVGSVFDVSNADR;IEEIFKK;LGSSEVEQVQLVVDGVK;LNYKPEEEYPDLSK;LSVEALNSLTGEFK;RGTGGVDTAAVGSVFDVSNADR;SFLVWVNEEDHLR;VLTLELYK
7.05124	7.00112	7.08012	7.15064	7.37497	7.19795	-0.197026	1.28207	40	38	47.168	P06733	ENO1	Alpha-enolase		AAVPSGASTGIYEALELR;AAVPSGASTGIYEALELRDNDK;AAVPSGASTGIYEALELRDNDKTR;AGYTDKVVIGMDVAASEFFR;AVEHINK;DATNVGDEGGFAPNILENK;DATNVGDEGGFAPNILENKEGLELLK;DYPVVSIEDPFDQDDWGAWQK;EGLELLK;FTASAGIQVVGDDLTVTNPK;FTASAGIQVVGDDLTVTNPKR;GNPTVEVDLFTSK;GNPTVEVDLFTSKGLFR;HIADLAGNSEVILPVPAFNVINGGSHAGNK;IDKLMIEMDGTENK;IEEELGSK;IEEELGSKAK;IGAEVYHNLK;IGAEVYHNLKNVIK;KLNVTEQEK;KLNVTEQEKIDK;LAMQEFMILPVGAANFR;LAQANGWGVMVSHR;LMI…
5.17313	5.17103	5.24778	5.30925	5.36938	5.25872	-0.115138	1.3229	55	45	97.147	P06737	PYGL	Glycogen phosphorylase, liver form		AAPGYHMAK;AKPLTDQEK;AKPLTDQEKR;APNDFNLR;AWELTQK;AWNTMVLK;DFNVGDYIQAVLDR;DFSELEPDK;DFSELEPDKFQNK;DGWQVEEADDWLR;DIINMLFYHDR;DLSQLTK;DYYFALAHTVR;EYAQNIWNVEPSDLK;EYYEALPELK;FSQFLETEYK;GAGTVFDAFPDQVAIQLNDTHPALAIPELMR;GIVGVENVAELK;GIVGVENVAELKK;HLEIIYEINQK;HLHFTLVK;IDDVAALDK;IDDVAALDKK;IFVDIEK;IFVDIEKLPWSK;IGEDYVK;IGEDYVKDLSQLTK;IHSDIVK;INPSSMFDVQVK;ISLSNESNK;IVALFPK;LHSFLGDDVFLR;LITSVADVVNNDPMVGSK;LKQ…
5.312	5.23778	5.25837	5.28076	5.42021	5.30127	-0.0646963	0.59281	28	21	63.146	P06744;Q8N196	GPI	Glucose-6-phosphate isomerase		AVLHVALR;DPSAVAK;DVMPEVNK;EFGIDPQNMFEFWDWVGGR;ELQAAGK;EWFLQAAK;FAAYFQQGDMESNGK;HFVALSTNTTK;IEPELDGSAQVTSHDASTNGLINFIK;ILLANFLAQTEALMR;INYTEGR;KIEPELDGSAQVTSHDASTNGLINFIK;LFDANKDR;LTPFMLGALVAMYEHK;MIPCDFLIPVQTQHPIR;MIPCDFLIPVQTQHPIRK;MLVDLAK;NLVTEDVMR;SELNLRR;SNTPILVDGK;SNTPILVDGKDVMPEVNK;SPEDLER;TFTTQETITNAETAK;TITDVINIGIGGSDLGPLMVTEALKPYSSGGPR;TLAQLNPESSLFIIASK;VDHQTGPIVWGEPGTNGQHAFYQLIHQGTK;VFE…
-0.113201	-0.219368	-0.249525	-0.147804	-0.278113	-0.184723	0.00951544	0.0580778	11	11	38.177	P06746	POLB	DNA polymerase beta		DIFDYIQWK;EEMLQMQDIVLNEVK;GFTINEYTIRPLGVTGVAGEPLPVDSEK;IDEFLATGK;KFVDEGIK;LLHQVVEQLQK;NVSQAIHK;QDDTSSSINFLTR;TLEDLRK;VHFITDTLSK;VSGIGPSAAR
4.60801	4.47068	4.42714	4.51813	4.67788	4.65759	-0.115925	0.71493	19	19	32.575	P06748	NPM1	Nucleophosmin		ADKDYHFK;ADKDYHFKVDNDENEHQLSLR;DELHIVEAEAMNYEGSPIK;DSKPSSTPR;DYHFKVDNDENEHQLSLR;GPSSVEDIK;GQESFKK;LAADEDDDDDDEEDDDEDDDDDDFDDEEAEEK;LLSISGK;MQASIEK;MSVQPTVSLGGFEITPPVVLR;MTDQEAIQDLWQWR;SAPGGGSK;SKGQESFK;SKGQESFKK;TVSLGAGAK;TVSLGAGAKDELHIVEAEAMNYEGSPIK;VDNDENEHQLSLR;VTLATLK
2.44216	2.36504	2.47036	2.45723	2.67016	2.76899	-0.206272	0.995027	30	12	32.95	P06753	TPM3	Tropomyosin alpha-3 chain		AADAEAEVASLNR;AADAEAEVASLNRR;AADESER;AELAESK;AISEELDHALNDMTSI;ALKDEEK;ALKDEEKMELQEIQLK;DAQEKLELAEK;DEEKMELQEIQLK;EDKYEEEIK;GTEDELDKYSEALK;GTEDELDKYSEALKDAQEK;HIAEEADR;HIAEEADRK;IQLVEEELDR;IQLVEEELDRAQER;KLVIIEGDLER;KLVIIEGDLERTEER;KYEEVAR;LATALQK;LDKENALDR;LKGTEDELDKYSEALK;LVIIEGDLER;MELQEIQLK;NVTNNLK;RIQLVEEELDR;RIQLVEEELDRAQER;SLEAQAEK;TIDDLEDELYAQK;YSQKEDKYEEEIK
2.87365	2.885	2.94768	3.07814	3.11743	3.03491	-0.174715	2.20773	29	29	116.04	P06756	ITGAV	Integrin alpha-V;Integrin alpha-V heavy chain;Integrin alpha-V light chain		AGTQLLAGLR;ALFLYSR;AMLHLQWPYK;ASGDFQTTK;DDPLEFK;DYAKDDPLEFK;ENPETEEDVGPVVQHIYELR;FDLQIQSSNLFDK;FGSAIAPLGDLDQDGFNDIAIAAPYGGEDK;FGSAIAPLGDLDQDGFNDIAIAAPYGGEDKK;FSVHQQSEMDTSVK;GATDIDK;GATDIDKNGYPDLIVGAFGVDR;IYIGDDNPLTLIVK;LEVSVDSDQK;LEVSVDSDQKK;LNGFEVFAR;LQEVGQVSVSLQR;LTPITIFMEYR;MFLLVGAPK;SAILYVK;SHQWFGASVR;SLLWTETFMNK;SSASFNVIEFPYK;STGLNAVPSQILEGQWAAR;VRPPQEEQER;VSPVVSHK;YDPNVYSIK;YNNQLATR
0.33062	0.381207	0.161543	0.265757	0.527223	0.164291	-0.0279671	0.0776188	9	9	53.162	P06858	LPL	Lipoprotein lipase		AQEHYPVSAGYTK;DFIDIESK;EPDSNVIVVDWLSR;GLGDVDQLVK;ITGLDPAGPNFEYAEAPSR;LSPDDADFVDVLHTFTR;LVAALYK;LVGQDVAR;REPDSNVIVVDWLSR
3.50976	3.38593	3.32372	3.32275	3.35278	3.23986	0.101342	0.721392	17	17	60.702	P06865	HEXA	Beta-hexosaminidase subunit alpha		AGAVAER;ALLSAPWYLNR;EDIPVNYMK;ELELVTK;EVIEYAR;GFGEDFK;GLETFSQLVWK;GLLLDTSR;GSYNPVTHIYTAQDVK;GYVVWQEVFDNK;IQPDTIIQVWR;ISYGPDWK;KGFGEDFK;KGSYNPVTHIYTAQDVK;LTSDLTFAYER;SNPEIQDFMR;TEIEDFPR
-1.10917	-1.03111	-1.02595	-1.14096	-0.912982	-1.07686	-0.0118074	0.0558198	7	7	44.002	P07093	SERPINE2	Glia-derived nexin		AKIEVSEDGTK;ASAATTAILIAR;DIVTVANAVFVK;DMIDNLLSPDLIDGVLTR;IEVSEDGTK;LVLVNAVYFK;VLGITDMFDSSK
3.33048	3.22133	3.3304	3.38156	3.29188	3.41413	-0.0684538	0.593399	21	21	52.948	P07099	EPHX1	Epoxide hydrolase 1		DKEETLPLEDGWWGPGTR;DVELLYPVK;EDDSIRPFK;EDDSIRPFKVETSDEEIHDLHQR;ENLGQGWMTQK;FLGLTER;FLSVLER;FSTWTNTEFR;GFNSVATAR;GGHFAAFEEPELLAQDIR;GGHFAAFEEPELLAQDIRK;IIPLLTDPK;KFLSVLER;KGFNSVATAR;KQVEILNR;KVISYWR;LISYSYMVR;VETSDEEIHDLHQR;VFYSLMR;VYVPTGFSAFPFELLHTPEK;YLEDGGLER
2.49139	2.45174	2.4759	2.58394	2.7646	2.65546	-0.194985	1.65277	8	8	10.044	P07108	DBI	Acyl-CoA-binding protein		AKWDAWNELK;AYINKVEELK;AYINKVEELKK;GTSKEDAMK;QATVGDINTERPGMLDFTGK;SQAEFEK;TKPSDEEMLFIYGHYK;WDAWNELK
5.34044	5.29714	5.25966	5.42628	5.37286	5.26213	-0.0546726	0.436488	21	19	36.638	P07195	LDHB	L-lactate dehydrogenase B chain		DDEVAQLK;DYSVTANSK;EKLIAPVAEEEATVPNNK;FIIPQIVK;GEMMDLQHGSLFLQTPK;GLTSVINQK;GMYGIENEVFLSLPCILNAR;IHPVSTMVK;IVADKDYSVTANSK;IVVVTAGVR;KSADTLWDIQK;LIAPVAEEEATVPNNK;LKDDEVAQLK;LKDDEVAQLKK;LKGEMMDLQHGSLFLQTPK;MVVESAYEVIK;QQEGESR;SADTLWDIQK;SLADELALVDVLEDK;SLADELALVDVLEDKLK;VIGSGCNLDSAR
0.354967	0.443769	0.394754	0.37775	0.557092	0.174076	0.0281909	0.0882018	16	13	61.516	P07196	NEFL	Neurofilament light polypeptide		AAKDEVSESR;ALYEQEIR;AQLQDLNDR;EGLEETLR;EYQDLLNVK;IDSLMDEISFLK;KGADEAALAR;KLLEGEETR;KVEGAGEEQAAK;LAAEDATNEK;LLEGEETR;NMQNAEEWFK;RIDSLMDEISFLK;SSFSYEPYYSTSYK;VHELEQQNK;YEEEVLSR
1.21189	1.14489	1.12033	1.16807	1.3237	1.05764	-0.0241009	0.106162	27	23	102.47	P07197	NEFM	Neurofilament medium polypeptide		AGGEGGSEEEGSDK;AQVQLDSDHLEEDIHR;ATAPEVK;ATLEMVNHEK;DIEEASLVK;EEGKPLQQEK;EELVADAK;EIEAEIQALR;EQLQGLNDR;EYQDLLNVK;FVEEIIEETK;GSPSTVSSSYK;ITSEGGDGATK;KLLEGEETR;LLEGEETR;LRDDTEAAIR;LTEAAEQNK;QLSDIEER;SEEVATKEELVADAK;SIELESVR;SNEKEQLQGLNDR;SVTVTQK;SYTLDSLGNPSAYR;VEEHEETFEEK;VHYLEQQNK;VQSLQDEVAFLR;VSGSPSSGFR
-0.534931	-0.514027	-0.559566	-0.544224	-0.335935	-0.448246	-0.0933733	0.689897	8	8	65.171	P07199	CENPB	Major centromere autoantigen B		EAGFGGGPNATITTSLK;GGVTTQALAK;GVVQQVK;IIQEVEENPDLR;LAAQSLDTSGLR;LPPLVAGK;VLLLAGR;YLTSFPIDDR
1.84181	1.78227	1.75986	1.88404	1.88529	1.91331	-0.0995658	1.71601	9	9	22.088	P07203	GPX1	Glutathione peroxidase 1		DYTQMNELQR;EALPAPSDDATALMTDPK;FLVGPDGVPLR;FLVGPDGVPLRR;GLVVLGFPCNQFGHQENAK;LITWSPVCR;NDVAWNFEK;NEEILNSLK;YVRPGGGFEPNFMLFEK
1.95701	1.78026	1.7947	1.86415	1.91151	1.8303	-0.0246611	0.149774	10	4	44.796	P07205	PGK2	Phosphoglycerate kinase 2		ELDYFAK;FHVEEEGK;KELDYFAK;LGDVYVNDAFGTAHR;NQITNNQR;SLLGKDVLFLK;VDFNVPMK;VLNNMEIGASLFDEEGAK;VSHVSTGGGASLELLEGK;WNTEDKVSHVSTGGGASLELLEGK
-0.732937	-0.748062	-0.820637	-0.74818	-0.659848	-0.643885	-0.0832408	0.920441	4	4	75.122	P07225	PROS1	Vitamin K-dependent protein S		IETISHEDLQR;KVESELIKPINPR;SQDILLSVENTVIYR;VYFAGFPR
4.82785	4.74505	4.81201	4.88694	4.95182	4.9286	-0.127487	1.80069	40	40	57.116	P07237	P4HB	Protein disulfide-isomerase		AEGSEIR;ALAPEYAK;DGVVLFK;DHENIVIAK;DVESDSAK;EADDIVNWLK;ENLLDFIK;FFPASADR;FLESGGQDGAGDDDDLEDLEEAEEPDMEEDDDQK;HNQLPLVIEFTEQTAPK;IFGGEIK;IKPHLMSQELPEDWDK;IKPHLMSQELPEDWDKQPVK;ILEFFGLK;ILEFFGLKK;ILFIFIDSDHTDNQR;KEECPAVR;KSNFAEALAAHK;LGETYKDHENIVIAK;LITLEEEMTK;LKAEGSEIR;MDSTANEVEAVK;NFEDVAFDEK;NFEDVAFDEKK;NGDTASPK;NNFEGEVTK;NNFEGEVTKENLLDFIK;QFLQAAEAIDDIPFGITSNSDVFSK;QLAPIWDK;SNFAEALAAHK;SVSDYDGK;TAAE…
4.26978	4.1945	4.12229	4.23837	4.494	4.35545	-0.167083	0.914918	10	10	20.863	P07305	H1-0	Histone H1.0;Histone H1.0, N-terminally processed		GVGASGSFR;KLAATPK;KSTDHPK;KSVAFKK;LAKSDEPK;LVTTGVLK;MTENSTSAPAAKPK;TENSTSAPAAKPK;VGENADSQIK;YSDMIVAAIQAEK
2.0564	2.00669	2.00164	2.05974	2.28532	2.20988	-0.163399	1.12075	10	10	11.261	P07311	ACYP1	Acylphosphatase-1		AEGNTLISVDYEIFGK;ANFNNEK;GTVQGQLQGPISK;HMQEWLETR;HTQAEGK;KHTQAEGK;KLGLVGWVQNTDR;LDYSDFQIVK;LGLVGWVQNTDR;VQGVFFR
-1.17049	-1.4502	-1.1334	-1.25197	-0.55333	-1.25145	-0.232448	0.386357	3	3	20.878	P07315;P07316;P11844	CRYGC;CRYGB	Gamma-crystallin C;Gamma-crystallin B		FHLSEIR;ITFYEDR;RGEYPDYQQWMGLSDSIR
-0.2544	-0.501982	-0.234161	-0.401869	0.232862	-0.119707	-0.233943	0.504599	3	3	20.738	P07320	CRYGD	Gamma-crystallin D		ITLYEDR;LIPHSGSHR;YQDWGATNAR
4.35596	4.25997	4.26472	4.32749	4.25205	4.27822	0.00763226	0.0697342	16	16	44.552	P07339	CTSD	Cathepsin D;Cathepsin D light chain;Cathepsin D heavy chain		AIGAVPLIQGEYMIPCEK;DPDAQPGGELMLGGTDSK;EGCEAIVDTGTSLMVGPVDEVR;FDGILGMAYPR;ISVNNVLPVFDNLMQQK;LLDIACWIHHK;LSPEDYTLK;LVDQNIFSFYLSR;QPGITFIAAK;QVFGEATK;QVFGEATKQPGITFIAAK;VGFAEAAR;VSTLPAITLK;YSQAVPAVTEGPIPEVLK;YYTVFDR;YYTVFDRDNNR
3.78904	3.64499	3.4956	3.40204	3.73963	3.85411	-0.0220518	0.0471988	27	27	38.604	P07355;A6NMY6	ANXA2;ANXA2P2	Annexin A2;Putative annexin A2-like protein		AEDGSVIDYELIDQDAR;AYTNFDAER;AYTNFDAERDALNIETAIK;DALNIETAIK;DIISDTSGDFR;DIISDTSGDFRK;DLYDAGVK;DLYDAGVKR;ELASALK;EMYKTDLEK;GLGTDEDSLIEIICSR;GVDEVTIVNILTNR;KELASALK;KLMVALAK;LMVALAK;LSLEGDHSTPPSAYGSVK;QDIAFAYQR;RAEDGSVIDYELIDQDAR;SEVDMLK;SLYYYIQQDTK;SVPHLQK;SYSPYDMLESIR;TDLEKDIISDTSGDFR;TDLEKDIISDTSGDFRK;TNQELQEINR;TPAQYDASELK;WISIMTER
2.86165	2.79044	2.80335	2.85152	2.89637	2.87329	-0.0552435	1.01907	28	28	81.889	P07384	CAPN1	Calpain-1 catalytic subunit		APSDLYQIILK;DEAFPPVPQSLGYK;DFFLANASR;DLGPNSSK;DMETIGFAVYEVPPELVGQPAVHLK;EGDFVLR;GHAYSVTGAK;GQVVSLIR;KAPSDLYQIILK;KWNTTLYEGTWR;LDETDDPDDYGDR;LEICNLTPDALK;LPPGEYVVVPSTFEPNK;LPPGEYVVVPSTFEPNKEGDFVLR;LVFVHSAEGNEFWSALLEK;LYELIITR;MAIESAGFK;NYLSIFR;NYPATFWVNPQFK;QLAGEDMEISVK;RPTELLSNPQFIVDGATR;SAGTVELDDQIQANLPDEQVLSEEEIDENFK;SEQFINLR;SGSMSAYEMR;TLDTDLDGVVTFDLFK;WKRPTELLSNPQFIVDGATR;WLQLTMFA;YLGQDYEQLR
3.83676	3.78466	3.63118	3.81287	3.87594	3.76012	-0.065444	0.39362	23	4	49.67	P07437;A6NNZ2	TUBB	Tubulin beta chain		AILVDLEPGTMDSVR;ALTVPELTQQVFDAK;EVDEQMLNVQNK;FPGQLNADLR;FPGQLNADLRK;FWEVISDEHGIDPTGTYHGDSDLQLDR;GHYTEGAELVDSVLDVVR;GHYTEGAELVDSVLDVVRK;IMNTFSVVPSPK;IREEYPDR;ISEQFTAMFR;ISVYYNEATGGK;KLAVNMVPFPR;LAVNMVPFPR;LHFFMPGFAPLTSR;LTTPTYGDLNHLVSATMSGVTTCLR;MAVTFIGNSTAIQELFK;MSMKEVDEQMLNVQNK;NMMAACDPR;NSSYFVEWIPNNVK;SGPFGQIFRPDNFVFGQSGAGNNWAK;TAVCDIPPR;YLTVAAVFR
0.555128	0.616085	0.580359	0.542053	0.901681	0.74514	-0.145768	0.620547	8	8	29.557	P07451	CA3	Carbonic anhydrase 3		DGIAVIGIFLK;EPMTVSSDQMAK;GGPLPGPYR;HDPSLQPWSVSYDGGSAK;IGHENGEFQIFLDALDK;SLLSSAENEPPVPLVSNWRPPQPINNR;VVFDDTYDR;YAAELHLVHWNPK
1.82556	1.41437	1.1956	1.61716	1.72359	2.05846	-0.321227	0.636604	10	9	39.746	P07585	DCN	Decorin		AHENEITK;ASYSGVSLFSNPVQYWEIQPSTFR;DLPPDTTLLDLQNNK;ELHLDNNK;GLNNLAK;ITEIKDGDFK;NLHALILVNNK;VDAASLK;VPGGLAEHK;VSPGAFTPLVK
0.240217	0.324965	0.124573	0.131418	0.267913	0.239859	0.0168549	0.0834955	9	9	58.112	P07602	PSAP	Prosaposin;Saposin-A;Saposin-B-Val;Saposin-B;Saposin-C;Saposin-D		DVVTAAGDMLK;EILDAFDK;HLAELNHQK;KLVGYLDR;LPALTVHVTQPK;LVGYLDR;NVIPALELVEPIK;NVIPALELVEPIKK;QEILAALEK
4.06895	3.94124	3.90976	3.94046	3.98706	3.87239	0.0400127	0.271917	23	23	63.137	P07686	HEXB	Beta-hexosaminidase subunit beta;Beta-hexosaminidase subunit beta chain B;Beta-hexosaminidase subunit beta chain A		ASAVGER;DMDDAYDR;DSAYPEELSR;EISEVFPDQFIHLGGDEVEFK;EPVAVLK;GFGTDFK;GFGTDFKK;GIAAQPLYAGYCNHENM;GSIVWQEVFDDK;GSIVWQEVFDDKAK;GSYSLSHVYTPNDVR;KLESFYIQK;LAPGTIVEVWK;LAPGTIVEVWKDSAYPEELSR;LESFYIQK;MVIEYAR;QKGFGTDFK;TLDAMAFNK;VEPLDFGGTQK;VLDIIATINK;VLPEFDTPGHTLSWGK;YHGYIFGFYK;YYKVEPLDFGGTQK
0.446795	0.306757	0.102222	0.119604	0.241595	0.0384502	0.152041	0.583811	2	2	37.564	P07711;Q5NE16;P43235;O60911	CTSL;CTSL3P;CTSK;CTSV	Procathepsin L;Cathepsin L;Cathepsin L heavy chain;Cathepsin L light chain;Putative inactive cathepsin L-like protein CTSL3P;Cathepsin K;Cathepsin L2		EKGYVTPVK;GYVTPVK
3.20415	3.12863	3.19998	3.29547	3.38288	3.49277	-0.212784	1.57433	11	8	15.054	P07737	PFN1	Profilin-1		AGWNAYIDNLMADGTCQDAAIVGYK;DSLLQDGEFSMDLR;DSPSVWAAVPGK;EGVHGGLINK;EGVHGGLINKK;SSFYVNGLTLGGQK;STGGAPTFNVTVTK;TDKTLVLLMGK;TFVNITPAEVGVLVGK;TFVNITPAEVGVLVGKDR;TLVLLMGK
0.844557	0.929459	0.997326	0.962765	0.86358	0.933043	0.00398477	0.0251412	10	10	30.005	P07738	BPGM	Bisphosphoglycerate mutase		AVGPHQFLGDQEAIQAAIK;EQMALNHGEEQVR;HGEGAWNK;HYGALIGLNR;KVEDQGK;LLPYWNER;LNSEGMEEAR;SYNVTPPPIEESHPYYQEIYNDR;SYNVTPPPIEESHPYYQEIYNDRR;TILISAHGNSSR
1.65092	1.588	1.58992	1.66523	1.7092	1.63696	-0.0608568	0.96716	11	11	19.608	P07741	APRT	Adenine phosphoribosyltransferase		AAIGLLAR;ADSELQLVEQR;AELEIQK;AELEIQKDALEPGQR;DALEPGQR;DISPVLKDPASFR;GKLPGPTLWASYSLEYGK;IDYIAGLDSR;LAPVPFFSLLQYE;LPGPTLWASYSLEYGK;SFPDFPTPGVVFR
3.77924	3.72368	3.74092	3.79362	3.93898	3.86199	-0.116917	1.21847	52	51	170.59	P07814	EPRS1	Bifunctional glutamate/proline--tRNA ligase;Glutamate--tRNA ligase;Proline--tRNA ligase		AALLNQHYQVNFK;AIQGGTSHHLGQNFSK;AYVDDTPAEQMK;DNYSPGWK;DQDLEPGAPSMGAK;DQVDIAVQELLQLK;EDVDAAVK;EENLADWYSQVITK;EKTHVADFAPEVAWVTR;EMPTSGSK;EVIPVNVPEAQEEMK;EVIPVNVPEAQEEMKEVAK;EYIPGQPPLSQSSDSSPTR;FAGGDYTTTIEAFISASGR;FDDTNPEK;FDDTNPEKEKEDFEK;FNHWELK;FPPEASGYLHIGHAK;FVELPGAEMGK;GDIIQLQR;GMTVEGLK;HPQPFLR;KEENLADWYSQVITK;KGDIIQLQR;KLTWFVNEGLVDGWDDPR;KPYIWEYSR;KVIDPVAPR;LLSVNIR;LNLENKDYK;LNLNNTVLSK;LTVAENEA…
2.41891	2.39775	2.34205	2.28603	2.38046	2.19637	0.0986172	0.786153	10	10	37.821	P07858	CTSB	Cathepsin B;Cathepsin B light chain;Cathepsin B heavy chain		DIMAEIYK;EQWPQCPTIK;GQDHCGIESEVVAGIPR;HYGYNSYSVSNSEK;HYGYNSYSVSNSEKDIMAEIYK;ICEPGYSPTYK;LPASFDAR;NGPVEGAFSVYSDFLLYK;QDKHYGYNSYSVSNSEK;SGVYQHVTGEMMGGHAIR
5.4889	5.38615	5.3917	5.45927	5.56151	5.533	-0.0956774	0.993135	52	27	84.659	P07900;Q14568	HSP90AA1	Heat shock protein HSP 90-alpha		ADLINNLGTIAK;AEADKNDK;ALLFVPR;APFDLFENR;APFDLFENRK;DNSTMGYMAAK;DQVANSAFVER;EDQTEYLEER;EDQTEYLEERR;EGLELPEDEEEK;EGLELPEDEEEKK;EGLELPEDEEEKKK;EKYIDQEELNK;ELHINLIPNK;ELHINLIPNKQDR;ELISNSSDALDK;ELISNSSDALDKIR;EMLQQSK;FYEQFSK;GVVDSEDLPLNISR;HFSVEGQLEFR;HGLEVIYMIEPIDEYCVQQLK;HIYYITGETK;HLEINPDHSIIETLR;HNDDEQYAWESSAGGSFTVR;HSQFIGYPITLFVEK;HSQFIGYPITLFVEKER;IMKDILEK;IRYESLTDPSK;KFYEQFSK;KHLEINPDHSIIETLR;…
1.38555	1.46911	1.44919	1.4436	1.66757	1.43401	-0.0804447	0.427764	11	11	43.363	P07902	GALT	Galactose-1-phosphate uridylyltransferase		ALPEVHYHLGQK;ANDHQHIR;DLTPEQAAER;KFMVGYEMLAQAQR;QQASEADAAAATFR;RLPELTPAER;RLPELTPAERDDLASIMK;RPWQGQVEPQLLK;SGTDPQQR;SQHGEPLLMEYSR;YNPLQDEWVLVSAHR
5.41758	5.2105	5.19029	5.3541	5.45176	5.32599	-0.104497	0.565997	25	23	33.67	P07910;O60812;B2RXH8;B7ZW38;P0DMR1	HNRNPC	Heterogeneous nuclear ribonucleoproteins C1/C2		AAVAGEDGR;ASNVTNK;AVVPSKR;GDDLQAIK;GDDLQAIKK;GDDQLELIK;GDDQLELIKDDEK;GFAFVQYVNER;IEKEQSK;IVGCSVHK;KDETNVK;KELTQIK;KSDVEAIFSK;LKGDDLQAIK;LKGDDLQAIKK;MIAGQVLDINLAAEPK;MYSYPAR;NDKSEEEQSSSSVK;QKVDSLLENLEK;SDVEAIFSK;SEEEQSSSSVK;VDSLLENLEK;VFIGNLNTLVVK;VPPPPPIAR;VSGNTSR
2.67485	2.72301	2.44702	2.4279	2.56349	2.4655	0.12933	0.616535	35	35	198.04	P07942	LAMB1	Laminin subunit beta-1		AAQNSGEAEYIEK;AEMLLEEAK;AEMLLEEAKR;ALDPAFK;AMDLDQDVLSALAEVEQLSK;AQVAAEK;AVITVQRPGR;DILAQSPAAEPLK;DVTEMMAQVEVK;EALEEAEK;ELAEQLEFIK;ELDSLQTEAESLDNTVK;ETVDSVER;GALDSITK;IEDPYSPR;IPSWTGAGFVR;KAAQNSGEAEYIEK;KAEMLQNEAK;KTEESADAR;KVENLIAK;LHTLGDNLLDSR;LLDELAGK;LRADEAK;NFLTQDSADLDSIEAVANEVLK;NIGNLFEEAEK;NVEELKR;QSAEDILLK;SLDIFTVGGSGDGVVTNSAWETFQR;TLDGELDEK;TLDGELDEKYK;TLLAQANSK;VESLSQVEVILQHSAADIAR;VSEIK…
1.08129	1.01482	1.02623	1.08939	1.14818	0.990629	-0.0352863	0.282366	14	7	60.801	P07947	YES1	Tyrosine-protein kinase Yes		AQFDTLQK;DAWEIPR;DWDEIRGDNVK;EVLEQVER;FQIINNTEGDWWEAR;GAYSLSIR;GSLLDFLK;LIEDNEYTAR;LLLNPGNQR;LPQLVDMAAQIADGMAYIER;SDVWSFGILQTELVTK;TTEDLSFK;VPYPGMVNR;WTAPEAALYGR
0.715101	0.649643	0.664213	0.776817	0.832068	0.850004	-0.143311	2.07397	10	8	58.573	P07948;P08631	LYN	Tyrosine-protein kinase Lyn		DAWEIPR;DFDPVHGDVIK;EEPIYIITEYMAK;EGFIPSNYVAK;GKDSLSDDGVDLK;GSLLDFLK;LIDFSAQIAEGMAYIER;LNTLETEEWFFK;QLLAPGNSAGAFLIR;VIEDNEYTAR
1.42069	1.42693	1.00294	0.878559	1.58347	1.8595	-0.156992	0.184856	27	12	32.85	P07951;CON__Q3SX28	TPM2	Tropomyosin beta chain		AADESER;AEQAEADK;AEQAEADKK;AEVAESK;AISEELDNALNDITSL;AMKDEEK;ATDAEADVASLNR;ATDAEADVASLNRR;EDKYEEEIK;GTEDEVEK;GTEDEVEKYSESVK;HIAEDSDR;IQLVEEELDR;IQLVEEELDRAQER;IVTNNLK;KATDAEADVASLNR;KYEEVAR;LATALQK;LKGTEDEVEK;LVILEGELER;MELQEMQLK;QLEEEQQALQK;RIQLVEEELDR;RIQLVEEELDRAQER;SLEAQADK;SLEAQADKYSTK;TIDDLEDEVYAQK
3.58286	3.52792	3.60397	3.61089	3.7078	3.61199	-0.0719741	0.850472	23	23	54.636	P07954	FH	Fumarate hydratase, mitochondrial		AAAEVNQDYGLDPK;AADEVAEGK;AIEMLGGELGSK;EFAQIIK;ETAIELGYLTAEQFDEWVKPK;FLGSGPR;IANAIMK;IEYDTFGELK;IEYDTFGELKVPNDK;IGGVTER;IPVHPNDHVNK;IYELAAGGTAVGTGLNTR;LHDALDAK;LMNESLMLVTALNPHIGYDK;LNDHFPLVVWQTGSGTQTNMNVNEVISNR;MPTPVIK;NVLHSAR;SGLGELILPENEPGSSIMPGK;SQSSNDTFPTAMHIAAAIEVHEVLLPGLQK;THTQDAVPLTLGQEFSGYVQQVK;VAALTGLPFVTAPNK;VPNDKYYGAQTVR;YYGAQTVR
-7.40843	-7.45541	-7.34068	-7.35816	-7.50346	-7.58968	0.0822652	0.473536	2	2	32.562	P07992	ERCC1	DNA excision repair protein ERCC-1		AYEQKPADLLMEK;TDSQTLLTTFGSLEQLIAASR
0.262188	0.296099	0.384937	0.276836	0.378276	0.217585	0.023509	0.146946	10	8	154.79	P08069	IGF1R	Insulin-like growth factor 1 receptor;Insulin-like growth factor 1 receptor alpha chain;Insulin-like growth factor 1 receptor beta chain		AVTLTMVENDHIR;DIYETDYYR;ELGQGSFGMVYEGVAK;GNLLINIR;GVVKDEPETR;IEFLNEASVMK;IIITWHR;TMPAEGADDIPGPVTWEPRPENSIFLK;TVNEAASMR;YADGTIDIEEVTENPK
-1.96036	-1.88976	-1.62146	-1.26071	-1.26896	-1.32672	-0.538396	2.1599	4	4	38.892	P08100	RHO	Rhodopsin		EAAAQQQESATTQK;NPLGDDEASATVSK;SAAIYNPVIYIMMNK;TETSQVAPA
2.9462	2.88739	2.68893	2.86968	2.91767	2.89371	-0.0528466	0.267272	23	23	129.31	P08123	COL1A2	Collagen alpha-2(I) chain		AGVMGPPGSR;AQPENIPAK;AVILQGSNDVELVAEGNSR;DYEVDATLK;GASGPAGVR;GDGGPPGMTGFPGAAGR;GDQGPVGR;GEAGAAGPAGPAGPR;GEIGAVGNAGPAGPAGPR;GEIGNPGR;GEPGSAGPQGPPGPSGEEGK;GEPGSAGPQGPPGPSGEEGKR;GETGPSGPVGPAGAVGPR;GHAGLAGAR;GPAGPSGPAGK;GPSGPQGIR;GPTGDPGK;GVGLGPGPMGLMGPR;GVVGPQGAR;HGNRGETGPSGPVGPAGAVGPR;SAPSLRPK;SLNNQIETLLTPEGSR;VGAPGPAGAR
5.30292	5.26161	5.27316	5.33818	5.57341	5.41026	-0.161389	1.07357	50	50	75.872	P08133	ANXA6	Annexin A6		AINEAYK;AINEAYKEDYHK;AKPAQGAK;ALIEILATR;ALLALCGGED;AMEGAGTDEK;DAFVAIVQSVK;DAISGIGTDEK;DAYERDLEADIIGDTSGHFQK;DLEADIIGDTSGHFQK;DLIADLK;DLMTDLK;DLMTDLKSEISGDLAR;EAILDIITSR;EDAQVAAEILEIADTPSGDK;EDAQVAAEILEIADTPSGDKTSLETR;EEDDVVSEDLVQQDVQDLYEAGELK;EEGGENLDQAR;EIKDAISGIGTDEK;EMSGDVR;GAGTDEK;GELSGDFEK;GFGSDKEAILDIITSR;GLGTDEDTIIDIITHR;GSIHDFPGFDPNQDAEALYTAMK;GTVRPANDFNPDADAK;ILISLATGHR;ILISLATGHREEGGENL…
-2.49485	-2.49787	-2.21789	-1.9771	-1.54559	-1.98389	-0.568008	1.52363	10	4	22.006	P08134	RHOC	Rho-related GTP-binding protein RhoC		DQFPEVYVPTVFENYIADIEVDGK;EVFEMATR;HFCPNVPIILVGNK;HFCPNVPIILVGNKK;KLVIVGDGACGK;LVIVGDGACGK;MKQEPVRSEEGR;QDEHTRR;QVELALWDTAGQEDYDR;SEEGRDMANR
-6.81575	-6.71184	-6.84871	-6.70395	-6.19006	-6.67315	-0.269714	0.719507	3	2	141.48	P08183;Q2M3G0	ABCB1	ATP-dependent translocase ABCB1		AGAVAEEVLAAIR;EIIGVVSQEPVLFATTIAENIR;GAQLSGGQK
2.32028	2.28959	2.25215	2.37425	2.41399	2.3354	-0.0872087	1.35645	23	23	67.993	P08195	SLC3A2	Amino acid transporter heavy chain SLC3A2		ADLLLSTQPGR;ADLLLSTQPGREEGSPLELER;DDVAQTDLLQIDPNFGSK;DLLLTSSYLSDSGSTGEHTK;EDFDSLLQSAK;EEGSPLELER;FTGLSKEELLK;GENSWFSTQVDTVATK;GLVLGPIHK;GQSEDPGSLLSLFR;GRLDYLSSLK;HWDQNER;IGDLQAFQGHGAGNLAGLK;IKVAEDEAEAAAAAK;LDYLSSLK;LEPHEGLLLR;LKLEPHEGLLLR;LLTSFLPAQLLR;NQKDDVAQTDLLQIDPNFGSK;SLLHGDFHAFSAGPGLFSYIR;VAEDEAEAAAAAK;VILDLTPNYR;WWHTGALYR
3.65624	3.54888	3.45218	3.50842	3.54463	3.42077	0.0611569	0.368207	18	18	74.731	P08236	GUSB	Beta-glucuronidase		ADFSDNR;ADFSDNRR;DKNHPAVVMWSVANEPASHLESAGYYLK;ELDGLWSFR;EVILPER;GFDWPLLVK;GFEEQWYR;GKGFDWPLLVK;HEDADIR;HFVGWVWYER;LLDAENK;MVIAHTK;RGFEEQWYR;RPLWESGPTVDMPVPSSFNDISQDWR;SAAFLLR;SLDPSRPVTFVSNSNYAADK;SLLEQYHLGLDQK;WLGANAFR
5.05891	4.97605	4.98582	5.08291	5.11973	5.02079	-0.0675542	0.801714	35	32	85.182	P08237	PFKM	ATP-dependent 6-phosphofructokinase, muscle type		AAYNLVK;AIAVLTSGGDAQGMNAAVR;ALVFQPVAELK;ALVFQPVAELKDQTDFEHR;AMNWMSGK;DLQANVEHLVQK;DQTDFEHR;EATWESVSMMLQLGGTVIGSAR;GGTPSAFDR;GITNLCVIGGDGSLTGADTFR;GQIEEAGWSYVGGWTGQGGSK;IGLIQGNR;IMEIVDAITTTAQSHQR;ITDEEATK;KFDEALK;KNVLGHMQQGGSPTPFDR;KSFEQISANITK;LLAHVRPPVSK;LNIIIVAEGAIDK;LPLMECVQVTK;MTHEEHHAAK;NGKPITSEDIK;NVLGHMQQGGSPTPFDR;QSAAGTK;SEWSDLLSDLQK;SFEQISANITK;SFMNNWEVYK;SGSHTVAVMNVGAPAAGMNAAVR;TFVLEVMG…
6.11712	6.08155	6.07717	6.11447	6.23848	6.12011	-0.0657409	0.708538	53	16	83.263	P08238	HSP90AB1	Heat shock protein HSP 90-beta		ADHGEPIGR;ADLINNLGTIAK;AEADKNDK;ALLFIPR;APFDLFENK;APFDLFENKK;DNSTMGYMMAK;EDQTEYLEER;EDQTEYLEERR;EEEDKDDEEKPK;EGLELPEDEEEK;EGLELPEDEEEKK;EGLELPEDEEEKKK;EKYIDQEELNK;ELISNASDALDK;ELISNASDALDKIR;ELKIDIIPNPQER;EMLQQSK;EQVANSAFVER;FYEAFSK;GFEVVYMTEPIDEYCVQQLK;GVVDSEDLPLNISR;HFSVEGQLEFR;HLEINPDHPIVETLR;HNDDEQYAWESSAGGSFTVR;IDIIPNPQER;IEDVGSDEEDDSGKDK;IEDVGSDEEDDSGKDKK;IRYESLTDPSK;KFYEAFSK;KHLEINPDHPIVET…
1.45131	1.41781	1.39765	1.43093	1.51589	1.37169	-0.0172453	0.143172	19	19	69.81	P08240	SRPRA	Signal recognition particle receptor subunit alpha		AGAVEQLR;ALADHSMAQTPR;AVVAALMK;DAAGIAMEAIAFAR;DIMDAQR;EAEESSK;EDMESVLDK;EGSDGPLATSKPVPAEK;FDTIDDK;GGNNSFTHEALTLK;GTLGGMFGMLK;ILTLTYVDK;LIDDVHR;LSALHPPEK;MLDFFTIFSK;MQDNAPLMTALAK;QALQESLVQILQPQR;TMVQLFEK;VMGTFSTVTSTVK
1.43229	1.51112	1.49101	1.41302	1.52511	1.42904	0.0224161	0.205005	18	18	64.369	P08243	ASNS	Asparagine synthetase [glutamine-hydrolyzing]		ADWLSHYWMPK;APSPEKAEEESER;ASVGMYLISK;DTYGVRPLFK;EAFSDGITSVK;EAQVQYPLQTFAIGMEDSPDLLAAR;EILWRPK;ELYLFDVLR;ETFEDSNLIPK;FPFNTPK;HSATPFLK;ILFNNAVK;LAVVDPLFGMQPIR;LFPGFEIETVK;VASVEMVK;VDGEIILHLYDK;VPFLDHR;WINATDPSAR
2.63094	2.58019	2.54344	2.62025	2.66619	2.45677	0.00378577	0.0183935	5	5	33.845	P08247	SYP	Synaptophysin		APPGAPEK;EPLGFVK;ETGWAAPFLR;MATDPENIIK;VVKEPLGFVK
-1.32429	-1.28468	-1.27865	-1.38318	-1.15229	-1.30258	-0.0165218	0.0846457	5	5	73.881	P08253;P09237	MMP2	72 kDa type IV collagenase;PEX		AFQVWSDVTPLR;GYPKPLTSLGLPPDVQR;IDAVYEAPQEEK;IIGYTPDLDPETVDDAFAR;LSQDDIK
-0.204428	-0.220991	-0.179504	0.296495	0.258468	0.176706	-0.445531	3.54873	8	8	25.631	P08263;P09210;Q16772;Q7RTV2	GSTA1;GSTA2;GSTA3	Glutathione S-transferase A1;Glutathione S-transferase A1, N-terminally processed;Glutathione S-transferase A2;Glutathione S-transferase A3		AILNYIASK;ISNLPTVK;KFLQPGSPR;LHYFNAR;SAEDLDKLR;SHGQDYLVGNK;WLLAAAGVEFEEK;YFPAFEK
-2.76586	-2.80724	-2.78223	-2.69575	-2.66982	-2.61321	-0.125519	2.00468	3	3	25.851	P08294	SOD3	Extracellular superoxide dismutase [Cu-Zn]		AGLAASLAGPHSIVGR;AVVVHAGEDDLGR;VTEIWQEVMQR
0.555679	0.500885	0.571524	0.560892	0.629844	0.492838	-0.0184952	0.153699	11	11	39.33	P08397	HMBS	Porphobilinogen deaminase		AKDQDILDLVGVLHDPETLLR;DQDILDLVGVLHDPETLLR;ELEHALEK;ENPHDAVVFHPK;ILDTALSK;IQTDSVVATLK;KFPHLEFR;KLDEQQEFSAIILATAGLQR;LDEQQEFSAIILATAGLQR;NEVDLVVHSLK;SVVGTSSLR
3.56985	3.47599	3.45541	3.53263	3.60986	3.38489	-0.00871245	0.0395771	20	20	43.295	P08559;P29803	PDHA1	Pyruvate dehydrogenase E1 component subunit alpha, somatic form, mitochondrial		AAASTDYYK;AAASTDYYKR;AHGFTFTR;EEIQEVR;EIDVEVR;EIEDAAQFATADPEPPLEELGYHIYSSDPPFEVR;EILAELTGR;GANQWIK;GDFIPGLR;GGSMHMYAK;GPILMELQTYR;LEEGPPVTTVLTR;MVNSNLASVEELK;MVNSNLASVEELKEIDVEVR;MVNSNLASVEELKEIDVEVRK;RGDFIPGLR;SDPIMLLK;SKSDPIMLLK;TREEIQEVR;YGMGTSVER
0.991537	0.929827	0.700266	0.967339	0.690763	1.09841	-0.0449603	0.108851	8	8	167.55	P08572	COL4A2	Collagen alpha-2(IV) chain;Canstatin		GAPGVTGPK;GEQGFMGNTGPTGAVGDR;GLDGYQGPDGPR;GLPGEVLGAQPGPR;IAVQPGTVGPQGR;IGLPGGK;SVSIGYLLVK;SYWLSTTAPLPMMPVAEDEIKPYISR
0.562233	0.591139	0.725731	0.737448	0.778531	0.584839	-0.073905	0.404056	6	6	35.422	P08574	CYC1	Cytochrome c1, heme protein, mitochondrial		AANNGALPPDLSYIVR;GLLSSLDHTSIR;LAYRPPK;LFDYFPKPYPNSEAAR;RGFQVYK;WASEPEHDHR
1.99358	1.9433	1.94633	1.98689	2.19689	2.15596	-0.152176	1.07897	10	7	25.486	P08579	SNRPB2	U2 small nuclear ribonucleoprotein B		DALQGFK;ELGSSTNALR;GQAFVIFK;GTFADKEK;HDIAFVEFENDGQAGAAR;ITPSHAMK;QLQGFPFYGKPMR;TDSDIISK;TVEQTATTTNK
3.47492	3.36161	3.3737	3.46389	3.51785	3.50124	-0.0909211	1.08743	21	21	51.556	P08621	SNRNP70	U1 small nuclear ribonucleoprotein 70 kDa		AETREER;DAPPPTR;DMHSAYK;DPIPYLPPLEK;EFEDPRDAPPPTR;EFEVYGPIK;EFEVYGPIKR;GGADVNIR;GGGGDMAEPSEAGDAPPDDGPPGELGPDGPDGPEEK;GGGGGQDNGLEGLGNDSR;GYAFIEYEHER;IHMVYSK;LGGGLGGTR;MWDPHNDPNAQGDAFK;QQEVETELK;REFEVYGPIKR;RGGADVNIR;RQQEVETELK;VLVDVER;VNYDTTESK;YDERPGPSPLPHR
-4.40117	-4.27966	-4.39542	-4.42565	-4.09385	-4.37906	-0.0592337	0.206286	3	2	55.674	P08651	NFIC	Nuclear factor 1 C-type		AVKDELLGEKPEVK;EDFVLSITGK;GIPLESTDGER
7.67673	7.52693	7.60451	7.68084	7.75783	7.80162	-0.14404	1.21233	53	44	53.651	P08670;P12036	VIM	Vimentin		DGQVINETSQHHDDLE;DNLAEDIMR;EEAENTLQSFR;EEAENTLQSFRQDVDNASLAR;EKLQEEMLQR;EKLQEEMLQREEAENTLQSFR;EMEENFAVEAANYQDTIGR;ETNLDSLPLVDTHSK;ETNLDSLPLVDTHSKR;EYQDLLNVK;FADLSEAANR;FANYIDK;FANYIDKVR;FLEQQNK;GTNESLER;ILLAELEQLK;ILLAELEQLKGQGK;ISLPLPNFSSLNLR;KLLEGEESR;KVESLQEEIAFLK;KVESLQEEIAFLKK;LGDLYEEEMR;LGDLYEEEMRELR;LHEEEIQELQAQIQEQHVQIDVDVSKPDLTAALR;LLEGEESR;LLQDSVDFSLADAINTEFK;LQDEIQNMK;LQDEIQNMKEEMAR;LQ…
1.7702	1.71695	1.68823	1.75486	1.71129	1.83409	-0.0416225	0.408774	10	10	15.55	P08708	RPS17	Small ribosomal subunit protein eS17		DNYVPEVSALDQEIIEVDPDTK;DNYVPEVSALDQEIIEVDPDTKEMLK;IAGYVTHLMK;LGNDFHTNK;LGNDFHTNKR;LLDFGSLSNLQVTQPTVGMNFK;LQEEERER;RDNYVPEVSALDQEIIEVDPDTK;VCEEIAIIPSK;VCEEIAIIPSKK
0.616243	0.64525	0.684179	0.72101	0.785613	0.721123	-0.0940243	1.49292	12	5	40.532	P08754	GNAI3	Guanine nucleotide-binding protein G(i) subunit alpha-3		EIYTHFTCATDTK;EYQLNDSASYYLNDLDR;IDFGEAAR;ISQSNYIPTQQDVLR;KDLFEEK;LKIDFGEAAR;LLLLGAGESGK;MFDVGGQR;NLREDGEK;NVQFVFDAVTDVIIK;QLFVLAGSAEEGVMTPELAGVIK;TTGIVETHFTFK
4.9201	4.7283	4.70758	4.75334	4.92439	4.86159	-0.0611111	0.29442	32	32	35.936	P08758	ANXA5	Annexin A5		ADAETLR;ADAETLRK;ALLLLCGEDD;DLLDDLK;DLLDDLKSELTGK;DLLDDLKSELTGKFEK;DPDAGIDEAQVEQDAQALFQAGELK;ETSGNLEQLLLAVVK;FITIFGTR;GAGTDDHTLIR;GAGTNEK;GDTSGDYK;GDTSGDYKK;GLGTDEESILTLLTSR;GTVTDFPGFDER;GTVTDFPGFDERADAETLR;KNFATSLYSMIK;LIVALMKPSR;LYDAYELK;MLVVLLQANR;MLVVLLQANRDPDAGIDEAQVEQDAQALFQAGELK;NFATSLYSMIK;QEISAAFK;QVYEEEYGSSLEDDVVGDTSGYYQR;SEIDLFNIR;SEIDLFNIRK;SELTGKFEK;SIPAYLAETLYYAMK;VLTEIIASR;WGTDEEK;…
2.83187	2.68392	2.61255	2.70278	2.91841	2.88305	-0.125301	0.604325	14	14	32.854	P08865;A0A8I5KQE6	RPSA;RPSA2	Small ribosomal subunit protein uS2;Small ribosomal subunit protein uS2B		ADHQPLTEASYVNLPTIALCNTDSPLR;AIVAIENPADVSVISSR;DPEEIEKEEQAAAEK;EHPWEVMPDLYFYR;FAAATGATPIAGR;FLAAGTHLGGTNLDFQMEQYIYK;FTPGTFTNQIQAAFR;FTPGTFTNQIQAAFREPR;KSDGIYIINLK;LLVVTDPR;SDGIYIINLK;SGALDVLQMK;SGALDVLQMKEEDVLK;YVDIAIPCNNK
1.00707	0.816343	0.800726	0.886932	1.0152	1.01053	-0.0961746	0.540933	3	3	25.636	P08962	CD63	CD63 antigen		DKVMSEFNNNFR;QQMENYPK;VMSEFNNNFR
-1.3158	-1.27795	-1.48553	-1.38695	-1.1324	-1.41981	-0.0467056	0.157662	4	4	38.632	P09001	MRPL3	Large ribosomal subunit protein uL3m		GQPATHGQTK;QLVSDEDKAQLASK;RPGAVATGDIGR;VGLIALK
2.84055	2.74156	2.68977	2.84882	2.95916	2.92921	-0.155106	1.31698	13	11	31.279	P09012	SNRPA	U1 small nuclear ribonucleoprotein A		AVPETRPNHTIYINNLNEK;AVQGGGATPVVGAVQGPVPGMPPMTQAPR;DALQGFK;EVSSATNALR;GQAFVIFK;HDIAFVEFDNEVQAGAAR;ITQNNAMK;KAVQGGGATPVVGAVQGPVPGMPPMTQAPR;LVPGRHDIAFVEFDNEVQAGAAR;SMQGFPFYDKPMR;SQETPATK;SQETPATKK;TDSDIIAK
-0.598469	-0.630119	-0.649059	-0.560488	-0.484246	-0.626482	-0.0688105	0.720839	3	3	30.77	P09038	FGF2	Fibroblast growth factor 2		AILFLPMSAK;LESNNYNTYR;LQLQAEER
-1.90389	-1.9271	-2.0758	-2.11816	-1.66613	-1.94511	-0.05913	0.155515	2	1	29.434	P09067	HOXB5	Homeobox protein Hox-B5		AFPAPAQEPR;YQTLELEK
5.49154	5.42743	5.47828	5.55335	5.46461	5.43807	-0.0195926	0.187358	26	23	47.268	P09104	ENO2	Gamma-enolase		AAVPSGASTGIYEALELR;AAVPSGASTGIYEALELRDGDK;AAVPSGASTGIYEALELRDGDKQR;AVDHINSTIAPALISSGLSVVEQEK;DATNVGDEGGFAPNILENSEALELVK;DGKYDLDFK;DGKYDLDFKSPTDPSR;DYPVVSIEDPFDQDDWAAWSK;EAIDKAGYTEKIVIGMDVAASEFYR;FAGHNFR;FTANVGIQIVGDDLTVTNPK;GNPTVEVDLYTAK;GNPTVEVDLYTAKGLFR;HIAQLAGNSDLILPVPAFNVINGGSHAGNK;IEEELGDEAR;IVIGMDVAASEFYR;LAMQEFMILPVGAESFR;LAQENGWGVMVSHR;LDNLMLELDGTENK;LGAEVYHTLK;SGETEDTFIADLVVGLCTGQIK;SPTD…
0.0509701	0.0371227	0.0537834	0.113575	0.237149	0.0590954	-0.0893145	0.777887	9	9	44.292	P09110	ACAA1	3-ketoacyl-CoA thiolase, peroxisomal		AEELGLPILGVLR;DGSTTAGNSSQVSDGAAAILLAR;EKQDTFALASQQK;GNPGNITSR;IAQFLSDIPETVPLSTVNR;QVITLLNELK;QVITLLNELKR;SITVTQDEGIRPSTTMEGLAK;SKAEELGLPILGVLR
-0.888399	-0.881552	-0.595774	-0.805414	-0.577332	-1.00681	0.00794315	0.0167776	2	2	16.156	P09132	SRP19	Signal recognition particle 19 kDa protein		SPADQDR;TGGADQSLQQGEGSK
4.56142	4.49768	4.45533	4.57314	4.65858	4.57467	-0.0973221	1.09465	14	14	23.356	P09211	GSTP1	Glutathione S-transferase P		AFLASPEYVNLPINGNGK;ALPGQLKPFETLLSQNQGGK;ASCLYGQLPK;DQQEAALVDMVNDGVEDLR;EEVVTVETWQEGSLK;FQDGDLTLYQSNTILR;MLLADQGQSWK;MLLADQGQSWKEEVVTVETWQEGSLK;MPPYTVVYFPVR;PPYTVVYFPVR;TLGLYGK;TLGLYGKDQQEAALVDMVNDGVEDLR;YISLIYTNYEAGK;YISLIYTNYEAGKDDYVK
0.824469	0.822985	1.09784	0.958525	1.05213	0.880947	-0.04877	0.178306	3	3	17.394	P09234	SNRPC	U1 small nuclear ribonucleoprotein C		ENVKDYYQK;TTAAFQQGK;WMEEQAQSLIDK
1.52204	1.34564	1.29857	1.07087	1.64521	1.64556	-0.0651325	0.116543	5	5	14.716	P09382	LGALS1	Galectin-1		DGGAWGTEQR;GEVAPDAK;LNLEAINYMAADGDFK;LPDGYEFK;SFVLNLGK
4.45859	4.50411	4.56683	4.52886	4.67526	4.46921	-0.0479345	0.280447	11	11	25.789	P09417	QDPR	Dihydropteridine reductase		AAAAAAGEAR;AALDGTPGMIGYGMAK;EGGLLTLAGAK;GAVHQLCQSLAGK;MTDSFTEQADQVTAEVGK;NRPSSGSLIQVVTTEGR;NSGMPPGAAAIAVLPVTLDTPMNR;QSIWTSTISSHLATK;TELTPAYF;VDAILCVAGGWAGGNAK;VLVYGGR
5.14132	5.07303	5.08358	5.18646	5.34357	5.25214	-0.161416	1.48767	19	18	24.893	P09429;B2RPK0;P23497	HMGB1;HMGB1P1	High mobility group protein B1;Putative high mobility group protein B1-like 1		EKGKFEDMAK;FKDPNAPK;GEHPGLSIGDVAK;GKFEDMAK;GKPDAAK;GKPDAAKK;HPDASVNFSEFSK;IKGEHPGLSIGDVAK;KFKDPNAPK;KHPDASVNFSEFSK;KHPDASVNFSEFSKK;KKHPDASVNFSEFSK;KLGEMWNNTAADDK;KLGEMWNNTAADDKQPYEK;LGEMWNNTAADDK;LGEMWNNTAADDKQPYEK;TYIPPKGETK;TYIPPKGETKK;YEKDIAAYR
4.71499	4.61224	4.66347	4.80112	4.89749	4.86055	-0.189486	2.01166	15	15	15.85	P09455	RBP1	Retinol-binding protein 1		ALDVNVALR;ALDVNVALRK;EFEEDLTGIDDR;EFEEDLTGIDDRK;EIVQDGDHMIIR;GWTQWIEGDELHLEMR;IANLLKPDK;IANLLKPDKEIVQDGDHMIIR;KIANLLKPDK;KIANLLKPDKEIVQDGDHMIIR;MLVNENFEEYLR;NYIMDFQVGK;NYIMDFQVGKEFEEDLTGIDDRK;PVDFTGYWK;VEGVVCK
2.17021	2.18114	2.16976	2.15857	2.21925	2.02526	0.03934	0.27502	12	10	40.05	P09471	GNAO1	Guanine nucleotide-binding protein G(o) subunit alpha		AMDTLGIEYGDKER;EDGISAAK;EYQLNDSAK;IGAADYQPTEQDILR;IIHEDGFSGEDVK;LFDVGGQR;LLLLGAGESGK;MEDTEPFSAELLSAMMR;NLKEDGISAAK;QYKPVVYSNTIQSLAAIVR;TTGIVETHFTFK;YYLDSLDR
-2.17728	-2.06066	-2.01402	-2.2174	-1.62453	-2.0616	-0.116143	0.250174	4	4	34.632	P09486	SPARC	SPARC		DEDNNLLTEK;LEAGDHPVELLAR;NVLVTLYERDEDNNLLTEK;RLEAGDHPVELLAR
-2.61394	-2.65559	-2.56159	-2.54721	-2.18696	-2.44159	-0.218452	0.925234	10	0	25.712	P09488;Q03013	GSTM1;GSTM4	Glutathione S-transferase Mu 1;Glutathione S-transferase Mu 4		GLAHAIR;KYTMGDAPDYDR;LGLDFPNLPYLIDGAHK;LLLEYTDSSYEEK;LLLEYTDSSYEEKK;LYSEFLGK;MAVWGNK;SQWLNEK;YLEELPEK;YTMGDAPDYDR
3.78979	3.7831	3.62157	3.5199	3.84553	3.95803	-0.0430021	0.109164	33	14	32.708	P09493	TPM1	Tropomyosin alpha-1 chain		AADESER;AELSEGK;AEQAEADK;AEQAEADKK;AISEELDHALNDMTSI;AQKDEEK;AQKDEEKMEIQEIQLK;ATDAEADVASLNR;ATDAEADVASLNRR;DAQEKLELAEK;EDRYEEEIK;GTEDELDKYSEALK;GTEDELDKYSEALKDAQEK;HIAEDADR;IQLVEEELDR;IQLVEEELDRAQER;KATDAEADVASLNR;KLVIIESDLER;KLVIIESDLERAEER;KYEEVAR;LATALQK;LDKENALDR;LKGTEDELDKYSEALK;LVIIESDLER;LVIIESDLERAEER;QLEDELVSLQK;RIQLVEEELDR;RIQLVEEELDRAQER;SIDDLEDELYAQK;SKQLEDELVSLQK;SLEAQAEK;TVTNNLK;YSQK…
2.04943	1.86717	1.805	1.90835	1.92085	2.02809	-0.0452255	0.212432	9	9	27.076	P09496	CLTA	Clathrin light chain A		ELEEWYAR;KQEAEWK;LEALDANSR;LQSEPESIR;LQSEPESIRK;QDEQLQK;SVLISLK;VADEAFYK;WREEQMER
2.28919	2.15399	2.15059	2.21832	2.19339	2.39367	-0.070536	0.380971	10	10	25.19	P09497	CLTB	Clathrin light chain B		AFYQQPDADIIGYVASEEAFVK;DLEEWNQR;EETPGTEWEK;ESKEETPGTEWEK;LQELDAASK;LTQEPESIR;LTQEPESIRK;QSEQVEK;SVLMSLK;VTEQEWR
2.41212	2.32464	2.24647	2.33475	2.45365	2.28992	-0.0316947	0.175819	21	21	35.882	P09525	ANXA4	Annexin A4		AASGFNAMEDAQTLR;AEIDMLDIR;DEGNYLDDALVR;DIEQSIK;GAGTDEGCLIEILASR;GDTSGDYR;GDTSGDYRK;GLGTDDNTLIR;GLGTDEDAIISVLAYR;ISQTYQQQYGR;KWGTDEVK;NHLLHVFDEYKR;QDAQDLYEAGEK;SAYFAEK;SDTSFMFQR;SETSGSFEDALLAIVK;SLEDDIR;SLYSFIK;TPEEIRR;VLVSLSAGGR;WGTDEVK
3.68618	3.67478	3.65178	3.76429	3.76097	3.66764	-0.0600506	0.837896	27	26	47.578	P09543	CNP	2,3-cyclic-nucleotide 3-phosphodiesterase		AGQVFLEELGNHK;AIFTGYYGK;APGAEEYAQQDVLK;APGAEEYAQQDVLKK;EKMDLVTYFGK;EKNQWQLSADDLK;EKNQWQLSADDLKK;GAFSEEYK;GAFSEEYKR;GEEVGELSR;GGSRGEEVGELSR;GKPVPTQGSR;GLPGSGK;ILVLDDTNHER;ILVLDDTNHERER;KAGQVFLEELGNHK;LEQLFEMADQYQYQVVLVEPK;LKPGLEK;LSPTDNLPR;MDLVTYFGK;MVSADAYK;NQWQLSADDLK;NQWQLSADDLKK;QFVPGDEPR;VELSEQQLQLWPSDVDK;VELSEQQLQLWPSDVDKLSPTDNLPR;WMLTLAK
-4.41752	-4.20525	-3.64963	-3.83683	-3.80097	-4.38146	-0.0843808	0.102472	2	2	32.818	P09601	HMOX1	Heme oxygenase 1;Heme oxygenase 1 soluble form		ALDLPSSGEGLAFFTFPNIASATK;ESPVFAPVYFPEELHR
1.50552	1.48275	1.48527	1.52969	1.68362	1.64374	-0.127838	1.28405	16	16	123.97	P09619	PDGFRB	Platelet-derived growth factor receptor beta		DSNYISK;GFSGIFEDR;GSTFLPLK;KGDVALPVPYDHQR;LLGEGYK;LLGEVGTLQFAELHR;LPGFHGLR;LQHVDRPLSVR;LVEPVTDFLLDMPYHIR;SDHPAILR;TLGDSSAGEIALSTR;VLELSESHPDSGEQTVR;VTDPQLVVTLHEK;YGDLVDYLHR;YQQVDEEFLR;YVSELTLVR
2.4586	2.42397	2.38887	2.42223	2.57865	2.46036	-0.0632671	0.546241	15	15	54.177	P09622	DLD	Dihydrolipoyl dehydrogenase, mitochondrial		AAQLGFK;ADGGTQVIDTK;ALLNNSHYYHMAHGK;ALTGGIAHLFK;EANLAASFGK;FPFAANSR;GIEMSEVR;IDVSIEAASGGK;IPNIYAIGDVVAGPMLAHK;LGADVTAVEFLGHVGGVGIDMEISK;NLGLEELGIELDPR;NQVTATK;SDGKIDVSIEAASGGK;SEEQLKEEGIEYK;TNADTDGMVK
4.66474	4.6976	4.66286	4.62641	4.92412	4.62583	-0.0503887	0.193319	21	18	38.746	P09651;A0A2R8Y4L2;Q32P51	HNRNPA1;HNRNPA1L3;HNRNPA1L2	Heterogeneous nuclear ribonucleoprotein A1;Heterogeneous nuclear ribonucleoprotein A1, N-terminally processed;Heterogeneous nuclear ribonucleoprotein A1-like 3;Heterogeneous nuclear ribonucleoprotein A1-like 2		DYFEQYGK;EDSQRPGAHLTVK;EDTEEHHLR;EDTEEHHLRDYFEQYGK;EPEQLRK;GFAFVTFDDHDSVDK;GFAFVTFDDHDSVDKIVIQK;GFGFVTYATVEEVDAAMNARPHK;GGGFGGNDNFGR;GGNFGGR;IEVIEIMTDR;IFVGGIKEDTEEHHLRDYFEQYGK;KLFIGGLSFETTDESLR;LFIGGLSFETTDESLR;NQGGYGGSSSSSSYGSGR;RGFAFVTFDDHDSVDK;SESPKEPEQLR;SESPKEPEQLRK;SGSGNFGGGR;SHFEQWGTLTDCVVMR;SSGPYGGGGQYFAKPR
2.31426	2.19794	2.2	2.29703	2.38115	2.38978	-0.118591	1.14986	15	15	28.415	P09661	SNRPA1	U2 small nuclear ribonucleoprotein A		DRELDLR;GGPSPGDVEAIK;GLLQSGQIPGR;IPVIENLGATLDQFDAIDFSDNEIR;IPVIENLGATLDQFDAIDFSDNEIRK;KGGPSPGDVEAIK;KLDGFPLLR;LDGFPLLR;LTAELIEQAAQYTNAVR;NAIANASTLAEVER;NPVTNKK;SLTYLSILR;TFNPGAGLPTDK;TFNPGAGLPTDKK;TLLVNNNR
-0.774248	-0.91548	-1.09395	-1.00899	-0.939237	-1.07229	0.0789467	0.323614	3	3	37.393	P09668	CTSH	Pro-cathepsin H;Cathepsin H mini chain;Cathepsin H;Cathepsin H heavy chain;Cathepsin H light chain		GIMGEDTYPYQGK;GNFVSPVK;VNHAVLAVGYGEK
0.947313	0.815815	0.785583	0.896091	0.934806	0.778406	-0.0201972	0.10656	6	6	8.7813	P09669	COX6C	Cytochrome c oxidase subunit 6C		AGIFQSVK;APEVLPKPR;AYADFYR;KAGIFQSVK;KAYADFYR;MAPEVLPKPR
5.6008	5.53194	5.53455	5.58801	5.6523	5.56046	-0.0444981	0.558605	66	66	113.08	P09874	PARP1	Poly [ADP-ribose] polymerase 1;Poly [ADP-ribose] polymerase 1, processed C-terminus;Poly [ADP-ribose] polymerase 1, processed N-terminus		AEPVEVVAPR;AMVEYEIDLQK;AQNDLIWNIK;AQNDLIWNIKDELK;AQNDLIWNIKDELKK;DPIDVNYEK;DSEEAEIIR;EDAIEHFMK;EEGINKSEK;EELGFRPEYSASQLK;ELLIFNK;FYPLEIDYGQDEEAVK;FYPLEIDYGQDEEAVKK;FYTLIPHDFGMK;GDEVDGVDEVAK;GFSLLATEDK;GFSLLATEDKEALKK;GGAAVDPDSGLEHSAHVLEK;GGSDDSSKDPIDVNYEK;GIYFADMVSK;GQDGIGSK;GQVKEEGINK;GTNSYYK;HASHISK;HPDVEVDGFSELR;IAPPEAPVTGYMFGK;KCSESIPK;KEWVTPK;KFYPLEIDYGQDEEAVK;KFYPLEIDYGQDEEAVKK;KGDEVDGVDEVA…
-2.28193	-2.37123	-2.42901	-2.58062	-2.05102	-2.57193	0.0404641	0.0791569	3	2	55.36	P09914	IFIT1	Interferon-induced protein with tetratricopeptide repeats 1		AQMIQIK;KPTFEVAHLDLAR;VLDQIEFLDTK
-5.64389	-5.3986	-5.58581	-5.53463	-5.41343	-5.77246	0.0307411	0.0845338	1	1	77.982	P09917	ALOX5	Polyunsaturated fatty acid 5-lipoxygenase		GVVTIEQIVDTLPDR
4.52514	4.55108	4.48722	4.54348	4.60455	4.49224	-0.0256109	0.274952	15	15	24.824	P09936	UCHL1	Ubiquitin carboxyl-terminal hydrolase isozyme L1		EFTEREQGEVR;FSAVALCK;GQEVSPK;KQIEELKGQEVSPK;LGFEDGSVLK;LGVAGQWR;MPFPVNHGASSEDTLLK;MPFPVNHGASSEDTLLKDAAK;MQLKPMEINPEMLNK;NEAIQAAHDAVAQEGQCR;QFLSETEK;QIEELKGQEVSPK;QTIGNSCGTIGLIHAVANNQDK;VDDKVNFHFILFNNVDGHLYELDGR;VNFHFILFNNVDGHLYELDGR
4.16513	4.02599	4.07559	4.12018	4.19671	4.14548	-0.0652234	0.63159	30	30	69.284	P09960	LTA4H	Leukotriene A-4 hydrolase		AILPCQDTPSVK;APLPLGHIK;ASMHPVTAMLVGK;DFLYSYFK;DGETPDPEDPSR;DGETPDPEDPSRK;DLAAFDK;DLSSHQLNEFLAQTLQR;EDDLNSFNATDLK;EDDLNSFNATDLKDLSSHQLNEFLAQTLQR;ELVALMSAIR;FTRPLFK;GSPMEISLPIALSK;HFNALGGWGELQNSVK;LTYTAEVSVPK;LVVDLTDIDPDVAYSSVPYEK;MQEVYNFNAINNSEIR;SAYEFSETESMLK;SHDQAVR;SITTDDWK;SLSNVIAHEISHSWTGNLVTNK;SLVLDTK;SSALQWLTPEQTSGK;TFGETHPFTK;TLTGTAALTVQSQEDNLR;TLVWSEK;TLVWSEKEQVEK;TWDHFWLNEGHTVYLER;VVINGQ…
4.92204	4.9324	4.9416	4.92039	5.00156	4.85711	0.00566196	0.0458962	28	23	39.455	P09972;P05062	ALDOC	Fructose-bisphosphate aldolase C		AEVNGLAAQGK;ALQASALNAWR;CQYVTEK;DDNGVPFVR;DGADFAK;DNAGAATEEFIK;DNAGAATEEFIKR;ELSDIALR;GILAADESVGSMAK;GIVVGIK;GVVPLAGTDGETTTQGLDGLSER;KDGADFAK;KELSDIALR;LSQIGVENTEENR;LSQIGVENTEENRR;PHSYPALSAEQK;QVLFSADDR;QVLFSADDRVK;RAEVNGLAAQGK;RLSQIGVENTEENRR;TPSALAILENANVLAR;TVPPAVPGVTFLSGGQSEEEASFNLNAINR;VDKGVVPLAGTDGETTTQGLDGLSER;VLAAVYK;YASICQQNGIVPIVEPEILPDGDHDLKR;YEGSGEDGGAAAQSLYIANHAY;YTPEEIAMATVTALR;YTP…
3.18337	3.0301	2.97207	2.66693	3.0245	2.95321	0.180303	0.645676	47	4	192.75	P0C0L5	C4B	Complement C4-B;Complement C4 beta chain;Complement C4-B alpha chain;C4a anaphylatoxin;C4b-B;C4d-B;Complement C4 gamma chain		AAANQMR;AEFQDALEK;AEMADQAAAWLTR;ALEILQEEDLIDEDDIPVR;ASSFLGEK;DDPDAPLQPVTPLQLFEGR;DFALLSLQVPLK;DFALLSLQVPLKDAK;DHAVDLIQK;DKGQAGLQR;EELVYELNPLDHR;EFHLHLR;EGAIHREELVYELNPLDHR;EMSGSPASGIPVK;EVYMPSSIFQDDFVIPDISEPGTWK;FGLLDEDGKK;GHLFLQTDQPIYNPGQR;GLEEELQFSLGSK;GLESQTK;GLQDEDGYR;GPEVQLVAHSPWLK;GSFEFPVGDAVSK;GSSTWLTAFVLK;HLVPGAPFLLQALVR;ITQVLHFTK;KADGSYAAWLSR;KYVLPNFEVK;LELSVDGAK;LGQYASPTAK;LNMGITDLQGLR;…
3.84613	3.87023	3.7063	3.75167	3.87165	3.70399	0.0317856	0.167959	5	3	13.509	Q71UI9;P0C0S5	H2AZ2;H2AZ1	Histone H2A.V;Histone H2A.Z		AGLQFPVGR;ATIAGGGVIPHIHK;GDEELDSLIK;HLQLAIR;HLQLAIRGDEELDSLIK
-6.07971	-5.99985	-5.9311	-6.03693	-5.88924	-6.2994	0.0716375	0.21903	4	4	64.88	P0C6S8	LINGO3	Leucine-rich repeat and immunoglobulin-like domain-containing nogo receptor-interacting protein 3		AFAGLLALEELTLER;HLAIASLEDQNFR;LIPPGVFTR;RLEVGDNDLVFVSR
-3.527	-3.55332	-3.52278	-3.55164	-3.61375	-3.49479	0.0190271	0.206299	2	2	73.305	P0C7T5	ATXN1L	Ataxin-1-like		GAIIQLATGELK;RVEDLQTQDFVR
-3.25432	-3.20263	-3.05334	-3.31041	-2.96842	-3.44805	0.072196	0.177052	5	5	90.476	P0C7U0	ELFN1	Protein ELFN1		DAFGHSLQR;IPYLPAAGEVEQYK;LVESADTPK;SGPVSVAEPPLVLLSEPLAAK;YGPELEAPGLAPLSQGPLLGPEAVTR
0.328375	0.345562	0.281803	0.317604	0.485778	0.26339	-0.0370105	0.205458	10	10	35.932	P0C870	JMJD7	Bifunctional peptidase and (3S)-lysyl hydroxylase JMJD7		AEAALEAVR;AQHPGVLYVQK;ATVGSTEVSVAVTPDGYADAVR;EFPAAAR;NALQHWPALQK;VPWIPLDPLAPDLAR;VVDEEAMEK;WSLPYFR;YPSYSQAQALR;YSYFQLLDSLTK
-1.56435	-1.53668	-1.55357	-1.63095	-1.13512	-1.46401	-0.141505	0.412329	4	4	41.739	P0CAP2	POLR2M	DNA-directed RNA polymerase II subunit GRINL1A		DKQHLDDITAAR;GFEPQAPEDLAQR;ITIADQGEQQSEENASTK;VSSQAEDTSSSFDNLFIDR
-3.32147	-2.52455	-3.1886	-3.5519	-1.7426	-3.10521	-0.211635	0.130169	1	1	12.184	P0CE72;P0CE71	OCM;OCM2	Oncomodulin-1;Putative oncomodulin-2		FFQTSGLSK
0.415129	0.387215	0.618456	0.525236	0.554723	0.53521	-0.0647898	0.369383	8	7	27.507	P0CG30;P0CG29	GSTT2B;GSTT2	Glutathione S-transferase theta-2B;Glutathione S-transferase theta-2		AVYIFAK;EFLQINSLGK;GLELFLDLVSQPSR;KTLPTPSPEAYQAMLLR;SKEFLQINSLGK;TAMDQALQWLEDK;TLPTPSPEAYQAMLLR;YQTPDHWYPSDLQAR
-1.6094	-1.58431	-1.64441	-1.62478	-0.599555	-1.35939	-0.418132	0.609474	2	2	5.2288	P0CG34;P0CG35;P0DX04	TMSB15A;TMSB15B;TMSB15C	Thymosin beta-15A;Thymosin beta-15B;Thymosin beta-15C		SDKPDLSEVEK;SDKPDLSEVEKFDR
-2.37155	-2.51137	-1.92319	-2.32157	-2.33976	-2.6698	0.175008	0.344514	7	7	64.596	P0CW18	PRSS56	Serine protease 56		ELLAWDPPQELQADAAR;GEQAEEVPVNR;HVAFSGLVGLEPATLAR;IVGGSAAPPGAWPWLVR;LAPALALPAPALR;LLVQALQAFR;SLAHTLLGLLR
-3.29482	-3.41995	-3.60173	-3.32417	-3.24916	-3.34934	-0.131281	0.628532	2	2	16.445	P0DI81;P0DI82	TRAPPC2;TRAPPC2B	Trafficking protein particle complex subunit 2;Trafficking protein particle complex subunit 2B		FIMLHDIR;KVQFLGK
-2.43527	-2.26827	-2.29026	-2.33158	-2.13157	-2.32053	-0.0700382	0.348395	1	1	9.1135	P0DJ07	PET100	Protein PET100 homolog, mitochondrial		LQEIEEFKER
-4.72503	-4.71092	-4.79049	-4.69931	-4.14331	-4.67757	-0.235417	0.570684	3	3	10.351	P0DJ93	SMIM13	Small integral membrane protein 13		APADEGHRPLT;ELVGDTGSQEGDHEPSGSETEEDTSSSPHR;RAPADEGHRPLT
5.36942	5.27795	5.36213	5.44333	5.49308	5.44541	-0.124107	1.68097	36	16	70.051	P0DMV8;P0DMV9	HSPA1A;HSPA1B	Heat shock 70 kDa protein 1A;Heat shock 70 kDa protein 1B		AEDEVQR;AFYPEEISSMVLTK;AQIHDLVLVGGSTR;ATAGDTHLGGEDFDNR;CQEVISWLDANTLAEKDEFEHK;DAGVIAGLNVLR;DISQNKR;DNNLLGR;EIAEAYLGYPVTNAVITVPAYFNDSQR;ELEQVCNPIISGLYQGAGGPGPGGFGAQGPK;FEELCSDLFR;FGDPVVQSDMK;GGSGSGPTIEEVD;HWPFQVINDGDKPK;IINEPTAAAIAYGLDR;ITITNDK;ITITNDKGR;KDISQNK;KFGDPVVQSDMK;LDKAQIHDLVLVGGSTR;LIGDAAK;LLQDFFNGR;LVNHFVEEFK;LVNHFVEEFKR;MKEIAEAYLGYPVTNAVITVPAYFNDSQR;MVQEAEK;NALESYAFNMK;NQVALNPQNTVFDAK…
2.30605	2.36934	2.20234	2.48641	2.46159	2.63669	-0.235657	1.49042	12	12	16.837	P0DP25;P0DP24;P0DP23;P27482;P02585	CALM3;CALM2;CALM1	Calmodulin-3;Calmodulin-2;Calmodulin-1		ADQLTEEQIAEFK;ADQLTEEQIAEFKEAFSLFDKDGDGTITTK;DGDGTITTK;DTDSEEEIR;DTDSEEEIREAFR;EADIDGDGQVNYEEFVQMMTAK;EAFSLFDK;EAFSLFDKDGDGTITTK;ELGTVMR;MKDTDSEEEIR;MKDTDSEEEIREAFR;VFDKDGNGYISAAELR
-2.93456	-2.56827	-2.64734	-2.8091	-2.56539	-2.76147	-0.00473404	0.0116629	1	1	15.237	P0DPB6	POLR1D	DNA-directed RNA polymerases I and III subunit RPAC2		GTLPAVEPFQR
-1.15332	-1.09642	-0.658531	-1.10965	-0.829473	-1.22289	0.0845823	0.162954	5	5	43.813	P0DTL6	ZFTRAF1	Zinc finger TRAF-type-containing protein 1		AAEAAEAAAAAAAAGSGK;FTVLNQTWVLK;IGYTEVQFRPYR;LFLFQIQK;QLQLQEAAGDPDAPPK
-0.736639	-0.825039	-0.867092	-0.756247	-0.74569	-0.761333	-0.0551666	0.643353	3	3	19.393	P10109	FDX1	Adrenodoxin, mitochondrial		DGETLTTK;ITVHFINR;VPETVADAR
-2.92907	-3.07258	-3.03007	-3.05204	-2.82998	-2.90132	-0.0827891	0.45748	7	3	20.615	P10114	RAP2A	Ras-related protein Rap-2a		EIEVDSSPSVLEILDTAGTEQFASMR;KEIEVDSSPSVLEILDTAGTEQFASMR;TMVDELFAEIVR;VDLESEREVSSSEGR;VPVILVGNK;VVVLGSGGVGK;YDPTIEDFYR
3.70716	3.63914	3.61539	3.65084	3.773	3.61765	-0.0266015	0.185801	24	24	60.67	P10155	RO60	RNA-binding protein RO60		AIADWYNEK;ALDAAFYK;ALLQEMPLTALLR;ALSVETEK;DELEVIHLIEEHR;EHLLTNHLK;EVHELYK;GCEVIQEIK;GGMALALAVTK;GWKEVHELYK;IPTHLFTFIQFK;KAIADWYNEK;KMDIPAK;LGLENAEALIR;LSHLKPSSEGLAIVTK;MEESVNQMQPLNEK;NFTLDMI;QIANSQDGYVWQVTDMNR;SFSQEGR;TNTPADVFIVFTDNETFAGGVHPAIALR;TRDELEVIHLIEEHR;TVEPTGK;WRPDEEILK;YLEAVEK
4.37493	4.2749	4.30412	4.32911	4.35532	4.26147	0.00268141	0.0219394	27	27	105.32	P10253	GAA	Lysosomal alpha-glucosidase;76 kDa lysosomal alpha-glucosidase;70 kDa lysosomal alpha-glucosidase		AGYIIPLQGPGLTTTESR;AHFPLDVQWNDLDYMDSR;AHFPLDVQWNDLDYMDSRR;DFPAMVQELHQGGR;DFTFNKDGFR;DGFRDFPAMVQELHQGGR;DSSTWTVDHQLLWGEALLITPVLQAGK;EPAIHSEGQWVTLPAPLDTINVHLR;GAYTQVIFLAR;GELFWDDGESLEVLER;GTRPFVISR;LDVMMETENR;LHFTIKDPANR;NHNSLLSLPQEPYSFSEPAQQAMR;QQPMALAVALTK;RDFTFNK;RDFTFNKDGFR;STFAGHGR;STGGILDVYIFLGPEPK;TTPTFFPK;TTPTFFPKDILTLR;VTSEGAGLQLQK;VTVLGVATAPQQVLSNGVPVSNFTYSPDTK;WGYSSTAITR;WTQLGAFYPFMR;YMM…
0.691191	0.662495	0.707232	0.720667	0.872249	0.698809	-0.0769358	0.616113	9	7	23.48	P10301	RRAS	Ras-related protein R-Ras		ADLESQR;DRDDFPVVLVGNK;GGGPGPGDPPPSETHK;LDILDTAGQEEFGAMR;LFTQILR;LNVDEAFEQLVR;LVVVGGGGVGK;QSFNEVGK;VKDRDDFPVVLVGNK
-3.19112	-3.09001	-2.94293	-3.21005	-2.88342	-3.37659	0.0820033	0.194569	4	1	40.648	P10321	HLA-C	HLA class I histocompatibility antigen, C alpha chain		APWVEQEGPEYWDR;DGEDQTQDTELVETRPAGDGTFQK;FDSDAASPR;FISVGYVDDTQFVR
-1.95549	-1.89565	-2.03064	-1.94741	-1.79196	-2.11639	-0.0086724	0.0287184	9	3	67.585	P10398	ARAF	Serine/threonine-protein kinase A-Raf		DQIIFMVGR;FLFHGFR;GSPSPASVSSGR;GYLSPDLSK;IGDFGLATVK;QTAQGMDYLHAK;SNNIFLHEGLTVK;VSQPTAEQAQAFK;WHGDVAVK
3.08605	3.1154	2.97534	3.11426	3.35962	3.04458	-0.113891	0.471666	22	7	21.865	P10412;P22492	H1-4	Histone H1.4		AASGEAKPK;AKKPAAAAGAK;AKKPAGAAK;ALAAAGYDVEK;ALAAAGYDVEKNNSR;ASGPPVSELITK;ASGPPVSELITKAVAASKER;ATGAATPK;AVAASKER;GTGASGSFK;GTLVQTK;KAASGEAKPK;KALAAAGYDVEK;KASGPPVSELITK;KATGAATPK;KPAAAAGAK;KPAGAAK;KSAGAAK;SETAPAAPAAPAPAEK;SGVSLAALK;SGVSLAALKK;SLVSKGTLVQTK
-1.47346	-1.57865	-1.51531	-1.60585	-1.2883	-1.51209	-0.0537252	0.210212	4	4	35.422	P10451;CON__P31096	SPP1	Osteopontin		AIPVAQDLNAPSDWDSR;GKDSYETSQLDDQSAETHSHK;ISHELDSASSEVN;YPDAVATWLNPDPSQK
2.74927	2.70042	2.70008	2.77057	2.7863	2.65879	-0.0219634	0.194536	18	18	68.996	P10515	DLAT	Dihydrolipoyllysine-residue acetyltransferase component of pyruvate dehydrogenase complex, mitochondrial		DIDSFVPSK;DVPLGTPLCIIVEK;GIDLTQVK;GVETIANDVVSLATK;ILVAEGTR;ILVPEGTR;ISVNDFIIK;KDIDSFVPSK;KYLEKPITMLL;LQPHEFQGGTFTISNLGMFGIK;LSEGDLLAEIETDK;LVPADNEK;VAPAPAAVVPPTGPGMAPVPTGVFTDIPISNIR;VFVSPLAK;VPEANSSWMDTVIR;VPLPSLSPTMQAGTIAR;VVDGAVGAQWLAEFR;YLEKPITMLL
2.34021	2.39739	2.50261	2.60236	2.72292	2.58891	-0.224659	1.61113	20	20	45.119	P10523	SAG	S-arrestin		AFATDSTDAEEDKIPK;AFVEQVANVVLYSSDYYVKPVAMEEAQEK;DAGEAEEGKR;DYIDHVSQVQPVDGVVLVDPDLVK;EIYFHGEPIPVTVTVTNNTEK;ESYQDANLVFEEFAR;IKHEDTNLASSTIIK;KVQHAPLEMGPQPR;LMHPQPEDPAK;LMHPQPEDPAKESYQDANLVFEEFAR;LQESLLK;LQESLLKK;LTVSGFLGELTSSEVATEVPFR;SEPNHVIFK;SEPNHVIFKK;TLTLLPLLANNR;VPPNSTLTK;VQHAPLEMGPQPR;VQVYPPVGAASTPTK;YGQEDIDVIGLTFR
1.90026	1.92506	1.94624	1.93256	2.15784	2.02973	-0.116186	0.807167	31	27	212.88	P10586	PTPRF	Receptor-type tyrosine-protein phosphatase F		AAGTEGPFQEVDGVATTR;AALEYLGSFDHYAT;AGLGEEFEK;AHTDVGPGPESSPVLVR;AYIATQGPLAESTEDFWR;DHPPIPITDLADNIER;ELPGELLGYR;FEVIEFDDGAGSVLR;FSQEYESIDPGQQFTWENSNLEVNKPK;FTLTGLKPDTTYDIK;GSGPLSPSIQSR;GSSAGGLQHLVSIR;GVEGSDYINASFLDGYR;GYQVTYVR;IQLSWLLPPQER;LSVLEEEQLPPGFPSIDMGPQLK;LVNIMPYELTR;NLYAHIQK;NVLELSNVVR;QFQFTDWPEQGVPK;SDMGVGVFTPTIEAR;TGEGFIDFIGQVHK;TQQGVPAQPADFQAEVESDTR;TSVLLSWEVPDSYK;VILTSIDGVPGSDYINANYIDGY…
0.0298138	0.0456886	0.0908337	0.111036	0.20943	-0.0640907	-0.0300131	0.13487	8	7	42.979	P10588	NR2F6	Nuclear receptor subfamily 2 group F member 6		AEPYPAAAGR;AFQEQVDK;AQVALTEYVR;AQYPSQPQR;AVAFMDQVR;AVPASLISQLFFMR;LLFSTVEWAR;TPIETLIR
0.644848	0.515196	0.507967	0.526939	0.752831	0.605448	-0.0724026	0.381583	8	7	46.155	P10589;P24468	NR2F1;NR2F2	COUP transcription factor 1;COUP transcription factor 2		AEPYPTSR;AMVVSSWRDPQDDVAGGNPGGPNPAAQAAR;DPQDDVAGGNPGGPNPAAQAAR;IFQEQVEK;LLFSAVEWAR;TPIETLIR;TVSSSVIEQLFFVR;VVAFMDHIR
1.72109	1.72315	1.62779	1.76459	1.83488	1.82354	-0.116993	1.42336	6	6	11.737	P10599	TXN	Thioredoxin		EKLEATINELV;LEATINELV;MIKPFFHSLSEK;TAFQEALDAAGDK;VGEFSGANK;VGEFSGANKEK
2.05607	2.06534	2.06844	2.13284	2.21123	2.15386	-0.102694	1.9082	7	7	13.696	P10606	COX5B	Cytochrome c oxidase subunit 5B, mitochondrial		EDPNLVPSISNK;EDPNLVPSISNKR;EIMLAAK;GASGTREDPNLVPSISNK;GLDPYNVLAPK;KGLDPYNVLAPK;LVPQQLAH
2.97631	2.87734	2.95038	2.95283	2.97605	2.98243	-0.0357631	0.505304	7	7	54.465	P10619	CTSA	Lysosomal protective protein;Lysosomal protective protein 32 kDa chain;Lysosomal protective protein 20 kDa chain		DTVVVQDLGNIFTR;EFSHIAFLTIK;GAGHMVPTDKPLAAFTMFSR;HLHYWFVESQK;QYSGYLK;SMNSQYLK;YGDSGEQIAGFVK
-4.93922	-4.80986	-4.93966	-4.81286	-4.41014	-4.78693	-0.22627	0.758847	1	1	17.598	P10620	MGST1	Microsomal glutathione S-transferase 1		IYHTIAYLTPLPQPNR
3.79008	3.72004	3.73449	3.78018	3.84185	3.76324	-0.0468855	0.663194	27	27	78.927	P10636	MAPT	Microtubule-associated protein tau		AKTDHGAEIVYK;DGTGSDDK;DGTGSDDKK;DQGGYTMHQDQEGDTDAGLK;GAAPPGQK;GQANATR;HLSNVSSTGSIDMVDSPQLATLADEVSASLAK;HQPGGGK;HVPGGGSVQIVYKPVDLSK;IGSLDNITHVPGGGNK;IGSLDNITHVPGGGNKK;IGSTENLK;KDQGGYTMHQDQEGDTDAGLK;KLDLSNVQSK;LDLSNVQSK;LQTAPVPMPDLK;QEFEVMEDHAGTYGLGDR;QEFEVMEDHAGTYGLGDRK;SGYSSPGSPGTPGSR;SKDGTGSDDK;SKDGTGSDDKK;SPVVSGDTSPR;TDHGAEIVYK;TPPKSPSSAK;TPPSSGEPPK;TPSLPTPPTR;TPSLPTPPTREPK
2.29207	2.22171	2.28402	2.35698	2.384	2.33064	-0.0912733	1.55392	18	14	42.981	P10644;REV__P30040	PRKAR1A	cAMP-dependent protein kinase type I-alpha regulatory subunit		AATVVAR;GAISAEVYTEEDAASYVR;HNIQALLK;ILMGSTLR;IVVQGEPGDEFFIILEGSAAVLQR;KMYEEFLSK;LEKEEAK;LGPSDYFGEIALLMNRPR;LTVADALEPVQFEDGQK;MESGSTAASEEAR;MYEEFLSK;NVLFSHLDDNER;QIQNLQK;RSENEEFVEVGR;SENEEFVEVGR;TMAALAK;VSILESLDK;VSILESLDKWER
-1.52897	-1.53244	-1.52169	-1.57185	-1.42874	-1.57847	-0.00134754	0.00905987	4	4	50.688	P10645	CHGA	Chromogranin-A;Vasostatin-1;Vasostatin-2;EA-92;ES-43;Pancreastatin;SS-18;WA-8;WE-14;LF-19;Catestatin;AL-11;GV-19;GR-44;ER-37;GE-25;Serpinin-RRG;Serpinin;p-Glu serpinin precursor		ELQDLALQGAK;GLSAEPGWQAK;RLEGQEEEEDNRDSSMK;RPEDQELESLSAIEAELEK
2.29668	2.26122	2.2929	2.33494	2.33745	2.40019	-0.0739234	1.42592	32	32	135.36	P10745	RBP3	Retinol-binding protein 3		AAHIPENAK;AIGPTETPSWPAPDAAAEDSPGVAPELPEDEAIR;AIVVGER;AKVPTVLQTAGK;ALAILTLR;AVGPQLVR;DRIPGIVPMQIPSPEVFEELIK;DYYTLVDR;EMLQHNQLR;FDAMAELETVK;FDMFGDGELLTQVSR;FSFHTNVLEDNIGYLR;GVAEDIAHILK;GVYLLTSHR;HEVLEGNVGYLR;IGESDFFFTVPVSR;IMHTDAMIIDMR;IPGIVPMQIPSPEVFEELIK;IYSRPDDSVSELWTHAQVVGER;LAQGAYR;LLVEHIWK;LNAGLQAASEDPR;LVADNYASAELGAK;QHLYSVFDR;QVWEPLQDTEHLIMDLR;SHEILSISDPQTLASVLTAGVQSSLNDPR;SVGASDGSSWEGVGVTP…
-1.27528	-1.2836	-1.13051	-1.22205	-1.07592	-1.19487	-0.0655107	0.41646	4	4	28.627	P10746	UROS	Uroporphyrinogen-III synthase		FAAIGPTTAR;HIQELSGDNIDQIK;LSHPEDYGGLIFTSPR;SVYVVGNATASLVSK
2.50055	2.41722	2.43284	2.53131	2.55295	2.55551	-0.0963837	1.64662	10	10	31.462	P10768	ESD	S-formylglutathione hydrolase		AFSGYLGTDQSK;AYDATHLVK;FAVYLPPK;FAVYLPPKAETGK;KAFSGYLGTDQSK;KIPVVFR;LQEGYDHSYYFIATFITDHIR;MYSYVTEELPQLINANFPVDPQR;SGYHQSASEHGLVVIAPDTSPR;SYPGSQLDILIDQGK
4.40836	4.29091	4.27265	4.33547	4.48605	4.38195	-0.077185	0.555641	39	39	61.054	P10809	HSPD1	60 kDa heat shock protein, mitochondrial		AAVEEGIVLGGGCALLR;ALMLQGVDLLADAVAVTMGPK;APGFGDNR;APGFGDNRK;CEFQDAYVLLSEK;DDAMLLK;DGVTVAK;DMAIATGGAVFGEEGLTLNLEDVQPHDLGK;EIGNIISDAMK;GANPVEIR;GANPVEIRR;GIIDPTK;GVMLAVDAVIAELK;GVMLAVDAVIAELKK;GYISPYFINTSK;IGIEIIK;IMQSSSEVGYDAMAGDFVNMVEK;IPAMTIAK;IQEIIEQLDVTTSEYEK;IQEIIEQLDVTTSEYEKEK;ISSIQSIVPALEIANAHR;KGVITVK;KISSIQSIVPALEIANAHR;KPLVIIAEDVDGEALSTLVLNR;LSDGVAVLK;LVQDVANNTNEEAGDGTTTATVLAR;NAGVEGSLIVE…
5.62696	5.51378	5.48191	5.81321	5.52917	5.52334	-0.0810213	0.314649	21	21	52.494	P10909	CLU	Clusterin;Clusterin beta chain;Clusterin alpha chain		ASSIIDELFQDR;EDALNETR;EILSVDCSTNNPSQAK;EIQNAVNGVK;ELDESLQVAER;EPQDTYHYLPFSLPHR;FMETVAEK;IDSLLENDR;IDSLLENDRQQTHMLDVMQDHFSR;KEDALNETR;KTLLSNLEEAK;KTLLSNLEEAKK;LANLTQGEDQYYLR;LFDSDPITVTVPVEVSR;QQTHMLDVMQDHFSR;RELDESLQVAER;RPHFFFPK;SGSGLVGR;TLLSNLEEAK;TLLSNLEEAKK;VTTVASHTSDSDVPSGVTEVVVK
6.23551	6.13572	6.17174	6.25189	6.35561	6.36006	-0.141528	1.43617	49	47	72.332	P11021	HSPA5	Endoplasmic reticulum chaperone BiP		AKFEELNMDLFR;ALSSQHQAR;DAGTIAGLNVMR;DNHLLGTFDLTGIPPAPR;EFFNGKEPSR;ELEEIVQPIISK;ETAEAYLGK;ETAEAYLGKK;FAEEDKK;FEELNMDLFR;IEIESFYEGEDFSETLTR;IEWLESHQDADIEDFK;IEWLESHQDADIEDFKAK;IINEPTAAAIAYGLDK;IINEPTAAAIAYGLDKR;ITITNDQNR;ITPSYVAFTPEGER;KELEEIVQPIISK;KKELEEIVQPIISK;KSDIDEIVLVGGSTR;KSQIFSTASDNQPTVTIK;KTKPYIQVDIGGGQTK;KVTHAVVTVPAYFNDAQR;LIGDAAK;LSSEDKETMEK;LYGSAGPPPTGEEDTAEK;LYGSAGPPPTGEEDTAEKDEL;MKET…
2.70833	2.83125	2.62409	2.57896	2.71897	2.52536	0.113465	0.610643	34	33	177.6	P11047	LAMC1	Laminin subunit gamma-1		AHVENTER;ALAEEAAK;AVEIYASVAQLSPLDSETLENEANNIK;DGFFGNPLAPNPADK;DGSEASLEWSSER;DIEEIMK;DTLQEANDILNNLK;DTLQEANDILNNLKDFDR;DTLQEANDILNNLKDFDRR;EAEREVMDLLR;EAQDVKDVDQNLMDR;EAQQALGSAAADATEAK;GKTEQQTADQLLAR;HKQEADDIVR;KQEAAIMDYNR;KVSDLENEAK;LIEIASR;LKDYEDLREDMR;LNEIEGTLNK;LNTFGDEVFNDPK;LSAEDLVLEGAGLR;MEAENLEQLIDQK;NISQDLEK;NTIEETGNLAEQAR;QDIAVISDSYFPR;QLQEAEK;SYYYAISDFAVGGR;TAAEEALR;TFAEVTDLDNEVNNMLK;VHE…
2.63125	2.70182	2.32939	2.2727	2.79406	2.95158	-0.118621	0.193835	54	25	223.9	P11055	MYH3	Myosin-3		ADIAESQVNK;AEDEEEINAELTAK;AGLLGTLEEMRDDR;AITDAAMMAEELKK;ANLLQAEVEELR;ANSLAAALDKK;AQHELEEAEER;ATLEQTER;DIDDLELTLAK;DLEEATLQHEAMVAALR;DTQLHLDDALR;ELEELSER;ELTYQSEEDRK;EQDTSAHLER;EQYEEEQEGKAELQR;GKNEEIQR;GQEDLKEQLAIVER;GQTVDQVHHAVNALSK;GSSFQTVSALFR;GTLEDQIISANPLLEAFGNAK;HADSVAELGEQIDNLQR;IAEKDEEIEQLKR;IEAQNQPFDAK;IHFGTTGK;INQQLDTK;IQLELTQVK;KLAEQELLDSNER;KMEGDLNEIEIQLSHANR;LAQESILDLENDKQQLDER;LASADI…
1.86588	1.76387	1.79309	1.86456	1.8906	1.92041	-0.0842384	1.15304	10	10	48.344	P11117	ACP2	Lysosomal acid phosphatase		DPYQEEEWPQGFGQLTK;EGMLQHWELGQALR;FLFGIYQQAEK;FVTLLYR;HVADGEDHA;LPPWASPQTMQR;LQGGVLLAQIR;LTEPVVPK;QTPEYQNESSR;TYPKDPYQEEEWPQGFGQLTK
5.59023	5.48155	5.44341	5.52204	5.71845	5.66424	-0.129846	0.821192	116	116	199.52	P11137	MAP2	Microtubule-associated protein 2		ADVQMEFIQGPK;ADVQMEFIQGPKEESK;AMTEPSALIEK;ANDRLDTVLEK;APCFPVESKEEEQIEK;APHWTSAPLTEASAHSHPPEIK;APHWTSAPLTEASAHSHPPEIKDQGGAGEGLVR;APQEADAFMGVESGHMK;ATELKLEATQDMTPSSK;ATGEESTQAEISCESPFLAK;DAHIPVVEEHVMGK;DENSFSLNSSISSSAR;DKVSDGVTK;DLATDLSLIEVK;DLSIPTDASSEK;DMQGTEEEK;DMQGTEEEKAPLALFGHTLVASLEDMK;DQEPTTDMLK;DQGGAGEGLVR;DTFTPSGQEPILTEK;DTFTPSGQEPILTEKETELK;DTFTPSGQEPILTEKETELKLEEK;DWFIEMPTEAK;EAINQETVQQR…
6.52407	6.44578	6.47173	6.54438	6.65087	6.55753	-0.103733	1.19895	47	39	70.897	P11142;P54652	HSPA8	Heat shock cognate 71 kDa protein		AEDEKQR;ATVEDEK;ATVEDEKLQGK;DAGTIAGLNVLR;DISENKR;DNNLLGK;EEFEHQQK;EEFEHQQKELEK;EIAEAYLGK;FDDAVVQSDMK;FEELNADLFR;GPAVGIDLGTTYSCVGVFQHGK;GTLDPVEK;HWPFMVVNDAGRPK;IINEPTAAAIAYGLDK;IINEPTAAAIAYGLDKK;IINEPTAAAIAYGLDKKVGAER;ITITNDK;ITITNDKGR;KDISENK;LDKSQIHDIVLVGGSTR;LIGDAAK;LLQDFFNGK;LSKEDIER;LYQSAGGMPGGMPGGFPGGGAPPSGGASSGPTIEEVD;MKEIAEAYLGK;MVNHFIAEFK;MVNHFIAEFKR;MVQEAEK;NQTAEKEEFEHQQK;NQVAMNPTNTVFDAK…
3.09901	2.98863	2.95257	3.12752	3.26434	3.16713	-0.172928	1.34888	9	9	54.083	P11166	SLC2A1	Solute carrier family 2, facilitated glucose transporter member 1		GTADVTHDLQEMK;GTADVTHDLQEMKEESR;KVTILELFR;QGGASQSDK;QGGASQSDKTPEELFHPLGADSQV;SFEMLILGR;TFDEIASGFR;TPEELFHPLGADSQV;VTILELFR
0.0498734	0.150352	-0.00140381	0.070261	0.243863	0.0825748	-0.065959	0.388742	5	5	53.924	P11169;Q8TDB8	SLC2A3;SLC2A14	Solute carrier family 2, facilitated glucose transporter member 3;Solute carrier family 2, facilitated glucose transporter member 14		AFEGQAHGADR;KEEENAK;LWGTQDVSQDIQEMKDESAR;QVTVLELFR;TFEDITR
3.66824	3.62106	3.62943	3.63073	3.68365	3.65049	-0.0153818	0.293822	33	30	97.016	P11171	EPB41	Protein 4.1		APIAAPEPELK;DVPIVHTETK;EESPQSK;EQHPDMSVTK;FLALGSK;FYPPDPAQLTEDITR;GGISETR;GQDLLKR;GVPWNFTFNVK;HHASISELKK;IEVKEESPQSK;INRFPWPK;IRPGEQEQYESTIGFK;IVITGDADIDHDQVLVQAIK;KEDEPPEQAEPEPTEAWK;KLSMYGVDLHK;LAPNQTK;LDGENIYIR;LFSSFLK;LSMYGVDLHK;LSTHSPFR;LTSTDTIPK;NFMESVPEPRPSEWDKR;QASALIDRPAPHFER;QDIVAGR;SLDGAAAVDSADR;SMTPAQADLEFLENAK;SMTPAQADLEFLENAKK;SPRPTSAPAITQGQVAEGGVLDASAK;SQVSEEEGKEVESDKEK;TQTVTISDNANA…
2.218	2.18539	2.16412	2.15734	2.35297	2.22081	-0.054539	0.384315	22	22	52.221	P11172	UMPS	Uridine 5-monophosphate synthase;Orotate phosphoribosyltransferase;Orotidine 5-phosphate decarboxylase		AALGPLVTGLYDVQAFK;AAWEAYLSR;ELITLAK;ELSFGAR;GIISAADR;GIISAADRLEAAEMYR;GIVSRPR;GLQEVGLPLHR;GSDIIIVGR;IASWADLVNAHVVPGSGVVK;IHPVASK;KAAWEAYLSR;KFADIGNTVK;KQYEGGIFK;KVDAETVGR;LEAAEMYR;LQAHGIR;MAEEHSEFVVGFISGSR;MLEILEQQK;SGLSSPIYIDLR;VDAETVGR;VTDAIVLLDR
3.09478	3.01992	3.05471	3.14769	3.09111	3.0509	-0.0401011	0.493398	11	11	39.233	P11177	PDHB	Pyruvate dehydrogenase E1 component subunit beta, mitochondrial		DAINQGMDEELERDEK;DFLIPIGK;DIIFAIK;DNNPVVVLENELMYGVPFEFPPEAQSK;ILEDNSIPQVK;IMEGPAFNFLDAPAVR;TIRPMDMETIEASVMK;TYYMSGGLQPVPIVFR;VFLLGEEVAQYDGAYK;VTGADVPMPYAK;VVSPWNSEDAK
0.63924	0.664089	0.729706	0.727507	0.84871	0.685217	-0.0761328	0.610634	12	12	53.516	P11182	DBT	Lipoamide acyltransferase component of branched-chain alpha-keto acid dehydrogenase complex, mitochondrial		ASHNIGIAMDTEQGLIVPNVK;DMTVPILVSKPPVFTGK;EDILNYLEK;ILKEDILNYLEK;KTLATPAVR;LREELKPIAFAR;LSDIGEGIR;LSEVVGSGK;LSFMPFFLK;QTGAILPPSPK;SYLENPAFMLLDLK;VIDGATMSR
5.56608	5.52633	5.5512	5.60546	5.69251	5.52355	-0.0593036	0.519406	57	44	96.695	P11216	PYGB	Glycogen phosphorylase, brain form		AAPGYHMAK;AKPLTDSEK;AKPLTDSEKR;ARPEYMLPVHFYGR;AWEITKK;DFYELEPEK;DFYELEPEKFQNK;DIVNMLMHHDR;DYFFALAHTVR;EIWGVEPSDLQIPPPNIPR;EIWGVEPSDLQIPPPNIPRD;EPDCFKDIVNMLMHHDR;EYYDHLPELK;FSAFLEK;GLAGLGDVAEVR;GLAGLGDVAEVRK;HLDHVAALFPGDVDR;HLEIIYAINQR;HLHFTLVK;IGEEFLTDLSQLK;IGEEFLTDLSQLKK;IHSEIVK;ILVDVEK;ILVDVEKVDWDK;INPSSMFDVHVK;IVNGWQVEEADDWLR;KLLPLVSDEVFIR;LKQEYFVVAATLQDIIR;LLPLVSDEVFIR;LQDFNVGDYIEAVLDR;LVTSIG…
1.92186	1.91166	1.9101	2.08894	2.32415	2.08534	-0.251601	1.47489	39	25	97.091	P11217	PYGM	Glycogen phosphorylase, muscle form		AAPGYHMAK;APNDFNLK;DFNVGGYIQAVLDR;DFYELEPHK;DIVNMLMHHDR;DYYFALAHTVR;EIWGVEPSR;GLAGVENVTELK;GLAGVENVTELKK;GYNAQEYYDR;GYNAQEYYDRIPELR;HLHFTLVK;HLQIIYEINQR;IGEDFISDLDQLR;IGEDFISDLDQLRK;IHSEILK;ILVDLER;LKQEYFVVAATLQDIIR;LLSFVDDEAFIR;LVTAIGDVVNHDPAVGDR;NIATSGK;NLAENISR;QEYFVVAATLQDIIR;QVIEQLSSGFFSPK;SRPLSDQEK;TCAYTNHTVLPEALER;TIFKDFYELEPHK;TNFDAFPDK;TVMIGGK;VAAAFPGDVDR;VEDVDKLDQR;VFADYEDYIK;VHINPNSLFD…
2.09899	2.09777	2.11879	2.11217	2.14703	2.0387	0.00588258	0.0626038	10	6	23.567	P11233	RALA	Ras-related protein Ral-A		AEQWNVNYVETSAK;EDENVPFLLVGNK;GQNSLALHK;QVSVEEAK;SALTLQFMYDEFVEDYEPTK;SDLEDKR;VFFDLMR;VIMVGSGGVGK;VKEDENVPFLLVGNK;VVLDGEEVQIDILDTAGQEDYAAIR
1.73826	1.74989	1.77806	1.8126	1.91385	1.73163	-0.0639588	0.520054	11	7	23.408	P11234	RALB	Ras-related protein Ral-B		AEEDKIPLLVVGNK;AEEWGVQYVETSAK;GQSSLALHK;QVPVEEAR;SALTLQFMYDEFVEDYEPTK;SKAEEWGVQYVETSAK;SKGQSSLALHK;VFFDLMR;VIMVGSGGVGK;VKAEEDKIPLLVVGNK;VVLDGEEVQIDILDTAGQEDYAAIR
0.663124	0.734587	0.710627	0.686937	1.0185	0.707335	-0.10148	0.39168	16	14	142.82	P11274	BCR	Breakpoint cluster region protein		AAATTSQPVLTSQQIETIFFK;AAQAPDGASEPR;AQFPDSEPPR;ASELDLEK;DALVSGALESTK;EFYDGLFPR;GQVQLDPQALQDRDWQR;ISQNFLSSINEEITPR;KQTGVFGVK;MVDPVGFAEAWK;RLEQEVNQER;STLVLHDLLK;SVGDIEQELER;VDPVGFAEAWK;VPELYEIHK;VSGVATDIQALK
1.04181	0.912409	0.87697	0.945456	0.929137	0.991589	-0.0116644	0.0767574	6	6	44.882	P11279	LAMP1	Lysosome-associated membrane glycoprotein 1		AFSVNIFK;ALQATVGNSYK;FFLQGIQLNTILPDAR;SHAGYQTI;TVESITDIR;VWVQAFK
2.79902	2.75477	2.7924	2.77061	2.90291	2.70744	-0.0115862	0.0683279	18	18	46.588	P11310	ACADM	Medium-chain specific acyl-CoA dehydrogenase, mitochondrial		AAWEVDSGR;AAWEVDSGRR;AFTGFIVEADTPGIQIGR;ALDEATK;ANWYFLLAR;EEIIPVAAEYDK;EFQATAR;EHIDKYKN;ELNMGQR;ENVLIGDGAGFK;EPGLGFSFEFTEQQK;GIVFEDVK;GIVFEDVKVPK;IYQIYEGTSQIQR;NTYYASIAK;TGEYPVPLIR;TRPVVAAGAVGLAQR;VAMGAFDK
-3.91588	-3.72684	-3.83838	-3.80854	-3.57453	-3.86539	-0.0775509	0.301512	2	2	91.867	P11362	FGFR1	Fibroblast growth factor receptor 1		DIHHIDYYK;IGPDNLPYVQILK
3.57865	3.57541	3.524	3.553	3.714	3.59994	-0.06296	0.546076	33	33	90.725	P11387;Q969P6	TOP1	DNA topoisomerase 1		AEEVATFFAK;AVALYFIDK;DEDDADYKPK;EDIKPLK;ELTAPDENIPAK;EMTNEEK;EQLADAR;GPVFAPPYEPLPENVK;HLQDLMEGLTAK;IEPPGLFR;KEMTNEEK;KLEEEEDGK;KLEEEEDGKLK;KVPEPDNK;KWGVPIEK;LEEQLMK;LEVQATDREENK;LNTGILNK;MLDHEYTTK;NIITNLSK;NLQLFMENK;NLQLFMENKQPEDDLFDR;QIALGTSK;QPEDDLFDR;QPEDDLFDRLNTGILNK;SGDHLHNDSQIEADFR;TYNASITLQQQLK;VEHINLHPELDGQEYVVEFDFLGK;VPSPPPGHK;WGVPIEK;WWEEERYPEGIK;YIMLNPSSR;YYNKVPVEK
-5.12403	-5.07737	-5.11511	-5.11249	-4.76334	-5.01821	-0.140823	0.598708	21	4	174.38	P11388	TOP2A	DNA topoisomerase 2-alpha		ELILFSNSDNER;ENMTLQPK;EVTFVPGLYK;EWLTNFMEDR;EWLTNFMEDRR;EYHTDTTVK;FLEEFITPIVK;FLYDDNQR;GFQQISFVNSIATSK;GIPVVEHK;GIPVVEHKVEK;HVDYVADQIVTK;IFDEILVNAADNK;IIIENKPK;IMIMTDQDQDGSHIK;IVGLQYK;KEWLTNFMEDR;KEWLTNFMEDRR;KSPSDLWK;QIMENAEINNIIK;YGVFPLR
3.64419	3.6215	3.57517	3.52752	3.6545	3.49983	0.0530024	0.439166	30	30	59.256	P11413	G6PD	Glucose-6-phosphate 1-dehydrogenase		AEQVALSR;DGLLPENTFIVGYAR;DLQSSDR;EMVQNLMVLR;EPFGTEGR;GGYFDEFGIIR;GPTEADELMK;GSTTATFAAVVLYVENER;GYLDDPTVPR;IDHYLGK;IFGPIWNR;IIVEKPFGR;KPGMFFNPEESELDLTYGNR;KQSEPFFK;LEDFFAR;LFYLALPPTVYEAVTK;LKLEDFFAR;LNSHMNALHLGSQANR;LPDAYER;LQFHDVAGDIFHQQCK;LSNHISSLFR;LTVADIR;LTVADIRK;NSYVAGQYDDAASYQR;QSEPFFK;RNELVIR;VGFQYEGTYK;VQPNEAVYTK;WDGVPFILR;WVNPHKL
1.24473	1.24803	1.19851	1.29656	1.34099	1.2749	-0.0737263	1.36769	8	8	17.776	P11441	UBL4A	Ubiquitin-like protein 4A		ALADGKR;FLHPEVTETMEK;HFSAADASR;LADSPPPQVWQLISK;LNLVVKPLEK;LSDYSIGPNSK;LTLDDIER;VLLEEGEAQR
0.220802	0.266474	0.384434	0.390488	0.48346	0.364748	-0.122329	0.943787	9	6	40.04	P11488;A8MTJ3	GNAT1	Guanine nucleotide-binding protein G(t) subunit alpha-1		AMTTLNIQYGDSAR;ASEYQLNDSAGYYLSDLER;EMSDIIQR;FVFDAVTDIIIK;LLLLGAGESGK;LVTPGYVPTEQDVLR;MFDVGGQR;TTGIIETQFSFK;VQFLELNMR
1.19595	1.15699	1.19242	1.21653	1.39818	1.20299	-0.0907793	0.638394	23	23	129.63	P11498	PC	Pyruvate carboxylase, mitochondrial		AAYGGGGR;ADEAYLIGR;AEAEAQAEELSFPR;ALAVSDLNR;ASPSPTDPVVPAVPIGPPPAGFR;AYVEANQMLGDLIK;DFTATFGPLDSLNTR;ELIPNIPFQMLLR;ENNVDAVHPGYGFLSER;FIGPSPEVVR;GLAPVQAYLHIPDIIK;GTPLDTEVPMER;HYFIEVNSR;IAPYVAHNFSK;LFLQGPK;LTSDSVK;QVGYENAGTVEFLVDR;SFQPDTGR;SLPDLGLR;VEGRPGASLPPLDLQALEK;VTTEDPAR;VVEIAPAAHLDPQLR;VVHSYEELEENYTR
1.06214	0.999823	1.06361	1.02253	1.31384	1.01373	-0.074844	0.301814	15	13	426.77	P11532;Q13474	DMD	Dystrophin		DAELIAEAK;IEHYASR;IFLTEQPLEGLEK;ILADLEEENR;ILADLEEENRNLQAEYDR;LEPQSMVWLPVLHR;LGLLLHDSIQIPR;LGSLNLR;MQILEDHNK;MTELYQSLADLNNVR;QLGEVASFGGSNIEPSVR;QLLEQPQAEAK;SPAQILISLESEER;VAAAETAK;VLMDLQNQK
3.56838	3.56941	3.56251	3.56598	3.81899	3.70188	-0.128846	0.815573	41	40	101.53	P11586	MTHFD1	C-1-tetrahydrofolate synthase, cytoplasmic;Methylenetetrahydrofolate dehydrogenase;Methenyltetrahydrofolate cyclohydrolase;Formyltetrahydrofolate synthetase;C-1-tetrahydrofolate synthase, cytoplasmic, N-terminally processed		AAEEIGIK;AAQAPSSFQLLYDLK;ASFITPVPGGVGPMTVAMLMQSTVESAK;AYIQENLELVEK;DDSNLYINVK;DVDGLTSINAGK;EHGAFDAVK;EIGLLSEEVELYGETK;EISAQIR;EQVPGFTPR;ETGVPIAGR;GALALAQAVQR;GFSNLKK;GVPTGFILPIR;IFHELTQTDK;ITIGQAPTEK;IYGADDIELLPEAQHK;KGEPVSAEDLGVSGALTVLMK;KITIGQAPTEK;KVVGDVAYDEAK;LAILQVGNR;LDIDPETITWQR;LKNQVTQLK;LPVEDKIR;LVGPEGFVVTEAGFGADIGMEK;MFGIPVVVAVNAFK;MHGGGPTVTAGLPLPK;NQVTQLK;QPSQGPTFGIK;TAHLDEEVNK;TAHLDEE…
2.05907	2.05705	2.00261	2.03427	2.14983	2.00097	-0.0221103	0.171553	23	23	274.37	P11717	IGF2R	Cation-independent mannose-6-phosphate receptor		AGFTAAYSEK;ALSSLHGDDQDSEDEVLTIPEVK;DIDTLRDPGSQLR;FLHQDIDSGQGIR;GAGAESSHPVR;GGTPYNNER;GHQAFDVGQPR;GTADAFIVR;GTQRPVFLK;KPWTAVDTSVDGR;KSDTSQVK;KVGTSDK;LGVIGDK;LVLSYVR;RYDLSALVR;SFSLGDIYFK;SSSAQQK;VAGLLTQK;VPIDGPPIDIGR;VVVTYSK;YDLSALVR;YVDQVLQLVYK;YYLQDGDLDVVFASSSK
4.13763	4.09016	4.06321	4.13244	4.24237	4.07179	-0.0518668	0.403605	12	12	39.724	P11766	ADH5	Alcohol dehydrogenase class-3		AALEACHK;AAVAWEAGKPLSIEEIEVAPPK;AFELMHSGK;GLMPDGTSR;GTAFGGWK;IDPLAPLDK;IIGVDINK;IIGVDINKDK;IKVDEFVTHNLSFDEINK;LVSEYMSK;SVESVPK;VDEFVTHNLSFDEINK
-1.24065	-1.23089	-1.19995	-1.22543	-1.14545	-1.35509	0.0181627	0.105051	7	6	33.729	P11802	CDK4	Cyclin-dependent kinase 4		ALQHSYLHKDEGNPE;APPPGLPAETIK;DLKPENILVTSGGTVK;IFDLIGLPPEDDWPR;LADFGLAR;RLEAFEHPNVVR;VTLVFEHVDQDLR
2.26866	2.07851	2.1312	2.13803	2.31008	2.21547	-0.0617387	0.338225	14	6	34.769	P11908	PRPS2	Ribose-phosphate pyrophosphokinase 2		ENIAEWK;FSNQETSVEIGESVR;INNAAFEAVVVTNTIPQEDK;IQVIDISMILAEAIR;KFSNQETSVEIGESVR;LGLELGK;LLSAGATK;LNVEFALIHK;MVLVGDVK;MVLVGDVKDR;RVTSIADR;VTAVIPCFPYAR;VTSIADR;VYAILTHGIFSGPAISR
4.06064	4.00586	3.98389	4.05743	4.20594	4.12188	-0.11162	1.07788	31	25	70.67	P11940;Q9H361;Q4VXU2;Q96DU9	PABPC1;PABPC3	Polyadenylate-binding protein 1;Polyadenylate-binding protein 3		AAYYPPSQIAQLRPSPR;AKEFTNVYIK;ALDTMNFDVIK;AVDEMNGK;AVNSATGVPTV;AVPNPVINPYQPAPPSGYFMAAIPQTQNR;EAELGAR;EFSPFGTITSAK;EFTNVYIK;FGPALSVK;FSPAGPILSIR;GFGFVCFSSPEEATK;GFGFVSFER;GYGFVHFETQEAAER;IVATKPLYVALAQR;KEFSPFGTITSAK;KSGVGNIFIK;LFPLIQAMHPTLAGK;NFGEDMDDER;NFGEDMDDERLK;NFGEDMDDERLKDLFGK;NLDDGIDDER;NLDDGIDDERLR;QAHLTNQYMQR;SGVGNIFIK;SKVDEAVAVLQAHQAK;SLGYAYVNFQQPADAER;VDEAVAVLQAHQAK;VMMEGGR;VMTDESGK;YQG…
1.70326	1.64231	1.62599	1.65909	1.8244	1.78409	-0.0986745	0.831315	11	11	28.768	P12004	PCNA	Proliferating cell nuclear antigen		AEDNADTLALVFEAPNQEK;ATPLSSTVTLSMSADVPLVVEYK;IADMGHLK;IEDEEGS;KVLEALK;LVQGSILK;LVQGSILKK;NLAMGVNLTSMSK;SEGFDTYR;VSDYEMK;YLNFFTK
-4.70435	-4.6932	-4.49651	-4.605	-4.58588	-4.76071	0.0191768	0.0773316	1	1	12.155	P12074	COX6A1	Cytochrome c oxidase subunit 6A1, mitochondrial		TKPFPWGDGNHTLFHNPHVNPLPTGYEDE
2.87662	2.8413	2.82436	2.79491	3.0249	2.88778	-0.0551017	0.331099	19	14	57.41	P12081	HARS1	Histidine--tRNA ligase, cytoplasmic		AALEELVK;AQLGPDESK;ASAELIEEEVAK;DQGGELLSLR;GLAPEVADR;GLDYYTGVIYEAVLLQTPAQAGEEPLGVGSVAAGGR;HGAEVIDTPVFELK;IFSIVEQR;IGDYVQQHGGVSLVEQLLQDPK;LEALEEK;LVSELWDAGIK;QALEGLGDLK;REDLVEEIK;REDLVEEIKR;TTETQVLVASAQK;VSWEEVK;VSWEEVKNEMVGEK;YDGLVGMFDPK;YDLTVPFAR
2.49352	2.53568	2.45956	2.52587	2.5413	2.18288	0.0795698	0.267242	16	12	181.06	P12107	COL11A1	Collagen alpha-1(XI) chain		ALDFHNSPEGISK;DGPAGLR;EKPGSWFSEFK;GEAGAEGPPGK;GEDGEIGPR;GETGFQGK;GEVGQIGPR;GPPGDDGPK;GPQGPAGR;GPTISAQEAQAQAILQQAR;GSDTAYR;GVAGKPGPR;IDQVPIVDVMINDFGDQNQK;QAQLSAPTK;SPVFLFEDHTGKPAPEDYPLFR;VAISVEK
2.72315	2.31108	2.39441	2.3907	2.51953	2.49389	0.00817204	0.0206624	18	18	108.53	P12109	COL6A1	Collagen alpha-1(VI) chain		AVQEAQR;EASSGAAK;ENYAELLEDAFLK;FIDNLRDR;GDPGFEGER;GLEQLLVGGSHLK;GVFHQTVSR;IALVITDGR;LKPYGALVDK;LLLFSDGNSQGATPAAIEK;LSIIATDHTYR;QVNEPHIR;SSVDAVK;TAEYDVAYGESHLFR;TDPAHDVR;VAVVQYSGTGQQRPER;VFSVAITPDHLEPR;VPSYQALLR
0.705141	0.364746	0.161263	0.230215	0.583982	0.647383	-0.0768099	0.138534	9	9	108.58	P12110	COL6A2	Collagen alpha-2(VI) chain		AAVFHEK;AAVFHEKDYDSLAQPGFFDR;DIASTPHELYR;DYDSLAQPGFFDR;LFAVAPNQNLK;LGEQNFHK;NFVINVVNR;NNNCPEK;RDDDPLNAR
0.789915	0.0552578	-0.0721207	0.0873928	0.666289	1.24832	-0.409649	0.404263	28	28	343.67	P12111	COL6A3	Collagen alpha-3(VI) chain		AAPLQGMLPGLLAPLR;ALNLGYALDYAQR;DGVPGGPGETGK;DSFQEVLR;DVVFLIDGSQSAGPEFQYVR;ELPSLEQK;GGSPLNTGK;IAVAQYSDDVK;IEDGVPQHLVLVLGGK;IEEGVPQFLVLISSGK;IGDLHPQIVNLLK;IIDELNVKPEGTR;ITEGVPQLLIVLTADR;LLTPITTLTSEQIQK;LLVLITGGK;LMHLEFGR;LQPVLQPLPSPGVGGK;LSDAGITPLFLTR;LVDYLDVGFDTTR;QLGTVQQVISER;SLDEISQPAQELK;SLDEISQPAQELKR;SQAPVLDAIR;SQHPYVLTEDTLK;SVEDAQDVSLALTQR;VAVIQFSDDPK;VGLEHLR;VNHFVPEAGSR
2.07365	2.00261	2.03112	2.15457	2.15388	2.11115	-0.104072	1.84207	14	6	33.064	P12235	SLC25A4	ADP/ATP translocase 1		AAYFGVYDTAK;DFLAGGVAAAVSK;EFHGLGDCIIK;EQGFLSFWR;GAWSNVLR;GDHAWSFLK;GMLPDPK;GNLANVIR;IAKDEGAK;LAADVGK;LLLQVQHASK;QLFLGGVDR;TAVAPIER;YFPTQALNFAFK
4.15279	3.99968	3.9225	4.10183	4.12999	3.94	-0.032286	0.13213	15	5	32.866	P12236	SLC25A6	ADP/ATP translocase 3;ADP/ATP translocase 3, N-terminally processed		AAYFGVYDTAK;DFLAGGIAAAISK;EQGVLSFWR;GAWSNVLR;GMGGAFVLVLYDELK;GMGGAFVLVLYDELKK;GMLPDPK;GNLANVIR;IFRDEGGK;LAADVGK;LLLQVQHASK;QIFLGGVDK;TAVAPIER;TEQAISFAK;YFPTQALNFAFK
3.56093	3.49667	3.50491	3.63315	3.63709	3.53632	-0.0813481	0.98687	21	19	55.804	P12268	IMPDH2	Inosine-5-monophosphate dehydrogenase 2		AMMYSGELK;DKYPNLQVIGGNVVTAAQAK;DYPLASK;EANEILQR;EDLVVAPAGITLK;FGVPVIADGGIQNVGHIAK;GKLPIVNEDDELVAIIAR;GMGSLDAMDK;HLSSQNR;KYEQGFITDPVVLSPK;LPIVNEDDELVAIIAR;LVGIISSR;NLIDAGVDALR;REDLVVAPAGITLK;RFGVPVIADGGIQNVGHIAK;TSSAQVEGGVHSLHSYEK;VAQGVSGAVQDK;VRDVFEAK;YEQGFITDPVVLSPK;YFSEADK;YFSEADKIK
4.65796	4.64675	4.64198	4.63862	4.84439	4.7125	-0.0829458	0.617255	119	119	267.29	P12270	TPR	Nucleoprotein TPR		AADSQNSGEGNTGAAESSFSQEVSR;AAVLQQVLER;AIESMEQQLSELK;AIESMEQQLSELKK;AIQDHLLEVEQSK;AIQDHLLEVEQSKDQMEK;ASTALSNEQQAR;AVASLSVK;AVEELHK;DEPQEPSNK;DEPQEPSNKVPEQQR;EAGEANK;EDVDDLVSQLR;EGVQGPLNVSLSEEGK;EITSLHER;EKEIAETR;EKQELQDDK;EKVQVTAK;ELEIAQDR;ELENANDLLSATK;ELLHSQNTWLNTELK;ELMLHAADVEALQAAK;ELQELQDSLNAER;EQQASMEEK;EQQPSSASER;ESAEFQTQLEK;ETLNQAETK;FEVAQVESLR;FHNELNAHIK;FKVESEQQYFEIEK;FLADQQSEIDGLK;GAILSE…
3.66713	3.47498	3.48263	3.75138	3.74053	3.70385	-0.190337	1.37868	15	15	36.474	P12271	RLBP1	Retinaldehyde-binding protein 1		AKDELNER;AKDELNEREETR;AQLEQLTTK;AVAEQLFGPQAQAENTAF;DHGPVFGPCSQLPR;EETREEAVR;ELQEMVQAQAASGEELAVAVAER;GFTMQQAASLR;KMVDMLQDSFPAR;LQYPELFDSLSPEAVR;MVDMLQDSFPAR;MVPEEEQELR;SEGVGTFR;VFVHGDDLSGFYQEIDENILPSDFGGTLPK;VQEKDSGFFLR
6.78686	6.73582	6.74526	6.85552	6.91217	6.80107	-0.100272	1.3153	21	20	42.644	P12277	CKB	Creatine kinase B-type		AIEKLAVEALSSLDGDLAGR;DLFDPIIEDR;FCTGLTQIETLFK;FPAEDEFPDLSAHNNHMAK;FSEVLKR;GGNMKEVFTR;GIWHNDNK;GIWHNDNKTFLVWVNEEDHLR;GTGGVDTAAVGGVFDVSNADR;HGGYKPSDEHK;LAVEALSSLDGDLAGR;LEQGQAIDDLMPAQK;LGFSEVELVQMVVDGVK;LLIEMEQR;LRFPAEDEFPDLSAHNNHMAK;PFSNSHNALK;RGTGGVDTAAVGGVFDVSNADR;SMTEAEQQQLIDDHFLFDKPVSPLLLASGMAR;TDLNPDNLQGGDDLDPNYVLSSR;TFLVWVNEEDHLR;VLTPELYAELR
0.235872	0.259745	0.0338001	-0.219902	0.366052	0.0582199	0.108349	0.231241	11	11	36.375	P12429	ANXA3	Annexin A3		ALLTLADGR;DIVDSIK;DYPDFSPSVDAEAIQK;GAGTNEDALIEILTTR;GIGTDEFTLNR;GIGTDEK;LTFDEYR;MASIWVGHR;SDTSGDYEITLLK;SEIDLLDIR;SLGDDISSETSGDFRK
2.65816	2.64327	2.70185	2.69756	2.83488	2.61336	-0.047506	0.286604	14	11	47.036	P12532	CKMT1A	Creatine kinase U-type, mitochondrial		GIWHNNEK;GTGGVDTAATGGVFDISNLDR;GWEFMWNER;HTTDLDASK;IPTPVIHTK;LGYILTCPSNLGTGLR;LSEMTEAEQQQLIDDHFLFDKPVSPLLTAAGMAR;LYPPSAEYPDLR;LYPPSAEYPDLRK;RGTGGVDTAATGGVFDISNLDR;RLYPPSAEYPDLR;SFLIWVNEEDHTR;SGYFDER;VVVDALSGLK
1.36554	1.42553	1.443	1.42842	1.61742	1.41992	-0.0772257	0.490476	16	16	50.47	P12694	BCKDHA	2-oxoisovalerate dehydrogenase subunit alpha, mitochondrial		AVAENQPFLIEAMTYR;EAGVLMYR;GPGYGIMSIR;HFVTISSPLATQIPQAVGAAYAAK;HLQTYGEHYPLDHFDK;HYLLSQGWWDEEQEK;ILYESQR;KQQESLAR;KVMEAFEQAER;LEFIQPNVISGIPIYR;QDHPISR;QGQIINPSEDPHLPK;SMTLLNTMDR;SVDEVNYWDK;VDGNDVFAVYNATK;VMEAFEQAER
2.91067	2.83574	2.88256	2.78521	2.87883	2.81851	0.0488049	0.626779	51	30	103.06	P12814;Q08043	ACTN1	Alpha-actinin-1		AETAANR;AGTQIENIEEDFR;AGTQIENIEEDFRDGLK;ALDFIASK;ASFNHFDR;ASFNHFDRDHSGTLGPEEFK;ASIHEAWTDGK;ATLPDADKER;DDPLTNLNTAFDVAEK;DHSGTLGPEEFK;DLLLDPAWEK;DQALTEEHAR;DYETATLSEIK;ETADTDTADQVMASFK;FAIQDISVEETSAK;GISQEQMNEFR;GYEEWLLNEIR;GYEEWLLNEIRR;HEAFESDLAAHQDR;HRPELIDYGK;HTNYTMEHIR;IDQLEGDHQLIQEALIFDNK;ILAGDKNYITMDELR;IMSIVDPNR;ISIEMHGTLEDQLSHLR;KAGTQIENIEEDFR;KAGTQIENIEEDFRDGLK;KDDPLTNLNTAFDVAEK;KHEAFESDLA…
0.417591	0.380331	0.298796	0.390785	0.420814	0.639486	-0.118122	0.618084	7	6	21.564	P12829	MYL4	Myosin light chain 4		ALGQNPTNAEVLR;EAFSLFDR;EQGTYEDFVEGLR;HVLATLGEK;IDFTADQIEEFK;MLDFETFLPILQHISR;NKEQGTYEDFVEGLR
-1.29096	-1.16828	-1.14188	-1.29504	-0.938701	-1.08863	-0.0929155	0.339808	25	6	223.09	P12883	MYH7	Myosin-7		ADIAESQVNK;AITDAAMMAEELKK;ANDDLKENIAIVER;AVVEQTER;DIDDLELTLAK;DLEEATLQHEATAAALR;DVFVPDDKQEFVK;DYHIFYQILSNK;ELTYQTEEDRK;EQDTSAHLER;GQNVQQVIYATGALAK;GTLEDQIIQANPALEAFGNAK;HADSVAELGEQIDNLQR;IEDEQALGSQLQK;IEELEEELEAER;ILNPAAIPEGQFIDSR;LASADIETYLLEK;LQDLVDK;LQEAEEAVEAVNAK;QAEEAEEQANTNLSK;SLSTELFK;TEELEEAK;TIHELEK;TKYETDAIQR;VGNEYVTK
2.65626	2.61167	2.56454	2.65026	2.76624	2.53049	-0.0381797	0.201537	15	9	59.834	P12931;P42685;Q04912;Q9H3Y6	SRC	Proto-oncogene tyrosine-protein kinase Src		AGPLAGGVTTFVALYDYESR;DAWEIPR;EVLDQVER;GPSAAFAPAAAEPK;GSLLDFLK;KLDSGGFYITSR;LFGGFNSSDTVTSPQR;LIEDNEYTAR;LLLNAENPR;LPQLVDMAAQIASGMAYVER;TETDLSFK;TLKPGTMSPEAFLQEAQVMK;VADFGLAR;VPYPGMVNR;WTAPEAALYGR
1.54663	1.46996	1.48596	1.52873	1.69046	1.50167	-0.0727708	0.501657	13	13	54.548	P12955	PEPD	Xaa-Pro dipeptidase		AAATGPSFWLGNETLK;AFTPFSGPK;AVYEAVLR;EASFDGISK;GVNTDSGSVCR;IDEPGLR;ISSEAHR;KNPAVQAGSIVVLQGGEETQR;LPASHATWMGK;NPAVQAGSIVVLQGGEETQR;TDMELEVLR;VPLALFALNR;YAVDDVQYVDEIASVLTSQKPSVLLTLR
5.14202	5.04758	4.99846	5.08	5.15265	5.09184	-0.045476	0.403492	47	47	69.842	P12956	XRCC6	X-ray repair cross-complementing protein 6		ALKPPPIK;DIISIAEDEDLR;DIISIAEDEDLRVHFEESSK;DKNSVNFK;DLLAVVFYGTEK;DSLIFLVDASK;DTGIFLDLMHLK;EETEELK;EETEELKR;ELVYPPDYNPEGK;ETNEPVK;EVAALCR;FDDPGLMLMGFKPLVLLK;FTVPMLK;HDNEGSGSK;IISSDRDLLAVVFYGTEK;IISSDRDLLAVVFYGTEKDK;ILELDQFK;IMATPEQVGK;IMLFTNEDNPHGNDSAK;IQVTPPGFQLVFLPFADDK;IQVTPPGFQLVFLPFADDKR;KHDNEGSGSK;KMPFTEK;KPGGFDISLFYR;KQELLEALTK;LGSLVDEFK;LGSLVDEFKELVYPPDYNPEGK;NIPPYFVALVPQEEELDDQK;NIYVLQELD…
4.76257	4.73146	4.74878	4.80256	4.86776	4.82728	-0.0849301	1.8064	40	40	82.704	P13010	XRCC5	X-ray repair cross-complementing protein 5		AFREEAIK;ANPQVGVAFPHIK;ASFEEASNQLINHIEQFLDTNETPYFMK;DDEAAAVALSSLIHALDDLDMVAIVR;DEKTDTLEDLFPTTK;DKPSGDTAAVFEEGGDVDDLLDMI;DQVTAQEIFQDNHEDGPTAK;EDGSGDRGDGPFR;EDIIQGFR;EEASGSSVTAEEAK;EEASGSSVTAEEAKK;EGLEIVK;EPLPPIQQHIWNMLNPPAEVTTK;FFMGNQVLK;GITEQQK;GITEQQKEGLEIVK;HIEIFTDLSSR;HLMLPDFDLLEDIESK;IQPGSQQADFLDALIVSMDVIQHETIGK;KDEKTDTLEDLFPTTK;KKDQVTAQEIFQDNHEDGPTAK;KTWTVVDAK;KVITMFVQR;KYAPTEAQLNAVDALIDSMSL…
2.79696	2.75622	2.85411	2.80136	2.94934	2.79873	-0.0473776	0.342189	14	14	19.576	P13073	COX4I1	Cytochrome c oxidase subunit 4 isoform 1, mitochondrial		AHESVVK;ASWSSLSMDEK;ASWSSLSMDEKVELYR;DHPLPEVAHVK;ESFAEMNR;FKESFAEMNR;HLSASQK;HYVYGPLPQSFDK;HYVYGPLPQSFDKEWVAK;RDHPLPEVAHVK;SEDFSLPAYMDR;VNPIQGLASK;WDYEKNEWK;WDYEKNEWKK
0.720976	0.621347	0.522566	0.589991	0.533711	0.460896	0.0934305	0.613235	5	5	44.96	P13473	LAMP2	Lysosome-associated membrane glycoprotein 2		EQTVSVSGAFQINTFDLR;GILTVDELLAIR;IPLNDLFR;SHTALLR;YLDFVFAVK
2.51196	2.39752	2.41606	2.59289	2.59744	2.55604	-0.140276	1.68512	10	10	49.973	P13489	RNH1	Ribonuclease inhibitor		DISSALR;ELALGSNK;ELCQGLGQPGSVLR;ELDLSNNCLGDAGILQLVESVR;ELSLAGNELGDEGAR;ELTVSNNDINEAGVR;ESLKELSLAGNELGDEGAR;LDDCGLTEAR;LEDAGVR;VNPALAELNLR
1.30811	1.35213	1.24817	1.37678	1.39205	1.14243	-0.000951449	0.00360933	16	14	111.25	P13497;Q9Y6L7	BMP1	Bone morphogenetic protein 1		AAAFLGDIALDEEDLR;AATSRPER;AGFAVNFFK;DGHSESSTLIGR;DYGHIQSPNYPDDYRPSK;ENIQPGQEYNFLK;FHSDDTITK;FVSDGSINK;FYSDNSVQR;GGGPQAISIGK;GIFLDTIVPK;ISVTPGEK;KPEPVLATGSR;LPEPIVSTDSR;SGLTADSK;SSSNWVGK
0.40288	0.451168	0.338108	0.247347	0.657504	0.611326	-0.108007	0.332791	44	11	222.76	P13535;Q9UKX3	MYH8	Myosin-8		AAYLQSLNSADLLK;ADIAESQVNK;AEEEEEINAELTAK;AITDAAMMAEELKK;DIDDLELTLAK;DLEEATLQHEAMVAALR;ELTYQTEEDRK;EQDTSAHLER;EQYEEEQEGKAELQR;ETQLHLDDALR;GQEDLKEQLAIVER;GQTVQQVYNAVGALAK;GSSFQTVSALFR;IAEQELLDASER;IEDEQAVEIQLQK;IEELGEEIEAER;IHFGTTGK;INQQLDTK;IQLELNQVK;KIAEQELLDASER;LASADIETYLLEK;LDEAEQLALK;LLASIDIDHTQYK;LQDLVDK;LQDLVDKLQAK;LQEAEEHVEAVNAK;LQHELEEAEER;LYDQHLGK;NALAHALQSSR;NLEQTVK;NLQQEISDLTEQIAEGGK;N…
4.96952	4.9481	4.88963	4.9269	5.0381	4.91384	-0.0238663	0.199351	40	40	94.573	P13591	NCAM1	Neural cell adhesion molecule 1		AAFSKDESK;AAFSKDESKEPIVEVR;AAHFVFR;AGEQDATIHLK;ALSSEWKPEIR;ASWTRPEK;AVGEEVWHSK;DESKEPIVEVR;DGEQIEQEEDDEK;DGEQIEQEEDDEKYIFSDDSSQLTIK;DIQVIVNVPPTIQAR;DISWFSPNGEK;DKDISWFSPNGEK;EASMEGIVTIVGLKPETTYAVR;EGEDAVIVCDVVSSLPPTIIWK;EPIVEVR;FFLCQVAGDAK;FIVLSNNYLQIR;GKDMEEGK;GLGEISAASEFK;GRDVILK;HTEPNETTPLTEPEK;ISVVWNDDSSSTLTIYNANIDDAGIYK;KTDEGTYR;KVDKNDEAEYICIAENK;LAALNGK;LEGQMGEDGNSIK;LPSGSDHVMLK;LTPNQQR;NAP…
-1.32894	-1.39684	-1.88394	-1.70567	-1.42529	-1.13195	-0.1156	0.182931	6	6	372.82	P13611	VCAN	Versican core protein		FTFEEAAK;HPVTVAR;LATVGELQAAWR;MFEHDFR;VGHDYQWIGLNDK;VSVPTHPEAVGDASLTVVK
2.72482	2.75176	2.67991	2.6954	2.81777	2.6486	-0.00176016	0.0106246	38	17	111.75	P13637;Q13733;P20648	ATP1A3	Sodium/potassium-transporting ATPase subunit alpha-3		AAVPDAVGK;ADIGVAMGIAGSDVSK;AQEILAR;DFTSEQIDEILQNHTEIVFAR;DGPNALTPPPTTPEWVK;DLDDLKK;DVAGDASESALLK;EAFQNAYLELGGLGER;EQPLDEEMK;EQPLDEEMKEAFQNAYLELGGLGER;EVAMTEHK;GGDRVPADLR;GGQDNIPVLK;GVGIISEGNETVEDIAAR;GVVVATGDR;IATLASGLEVGK;KADIGVAMGIAGSDVSK;KVAEIPFNSTNK;LIFDNLK;LIFDNLKK;LIIVEGCQR;LNIPVSQVNPR;MQVNAEEVVVGDLVEIK;NLEAVETLGSTSTICSDK;NMVPQQALVIR;NSVFQQGMK;QAADMILLDDNFASIVTGVEEGR;QGAIVAVTGDGVNDSPALK;QGA…
5.37289	5.32128	5.26917	5.3094	5.4627	5.31519	-0.0413129	0.285259	46	45	95.337	P13639	EEF2	Elongation factor 2		AGIIASAR;ALLELQLEPEELYQTFQR;ARPFPDGLAEDIDK;ARPFPDGLAEDIDKGEVSAR;AYLPVNESFGFTADLR;DGAGFLINLIDSPGHVDFSSEVTAALR;DSVVAGFQWATK;EDLYLKPIQR;EGIPALDNFLDK;EGIPALDNFLDKL;ETVSEESNVLCLSK;FSVSPVVR;GEGQLGPAER;GGGQIIPTAR;GHVFEESQVAGTPMFVVK;GPLMMYISK;GVQYLNEIK;IKPVLMMNK;IMGPNYTPGK;IMGPNYTPGKK;IWCFGPDGTGPNILTDITK;KEDLYLKPIQR;KSDPVVSYR;KVEDMMK;LDSEDKDK;MVPTSDK;NMSVIAHVDHGK;NPADLPK;QFAEMYVAK;RGHVFEESQVAGTPMFVVK;SAT…
4.78199	4.69749	4.72432	4.74371	4.88887	4.84172	-0.0901658	0.845981	47	47	72.932	P13667	PDIA4	Protein disulfide-isomerase A4		AATQFWR;DFPEYTFAIADEEDYAGEVK;DGDDVIIIGVFK;DKDPPIPVAK;DLEHLSK;DLGLSESGEDVNAAILDESGK;DLGLSESGEDVNAAILDESGKK;EFVTAFK;EFVTAFKK;EVSQPDWTPPPEVTLVLTK;FAMEPEEFDSDTLR;FDVSGYPTLK;FEGGDRDLEHLSK;FHHTFSTEIAK;FIEEHATK;GESDPAYQQYQDAANNLR;GESDPAYQQYQDAANNLREDYK;GQAVDYEGSR;GRPYDYNGPR;IDATSASVLASR;KFAMEPEEFDSDTLR;KGQAVDYEGSR;KGRPYDYNGPR;KLAPEYEK;KVSNDAK;LAPEYEK;MDATANDVPSDR;QFAPEYEK;QLEPVYNSLAK;QVQEFLK;QVQEFLKDGDD…
3.99263	4.01247	4.01087	4.03604	4.19295	4.09911	-0.10404	1.06223	30	30	61.049	P13674	P4HA1	Prolyl 4-hydroxylase subunit alpha-1		AEEDKLEQIK;AEEDKLEQIKK;ATISNPITGDLETVHYR;DLVTSLK;DLVTSLKDYIK;DPEGFVGHPVNAFK;ELGTGNR;FHDIISDAEIEIVK;FILAPAK;FILAPAKQEDEWDKPR;GNLPGVK;GVAVDYLPER;KDEPDAFK;KDEPDAFKELGTGNR;KGVAVDYLPER;KLLELDPEHQR;LLELDPEHQR;LNTEWSELENLVLK;LQDTYNLDTDTISK;LTSTATKDPEGFVGHPVNAFK;QEDEWDKPR;QLDEGEISTIDK;QYFPNDEDQVGAAK;RLNTEWSELENLVLK;RPCTLSELE;SASDDQSDQK;SAWLSGYENPVVSR;VAYTEADYYHTELWMEQALR;VSVLDYLSYAVYQQGDLDK;YFEYIMAK
-3.04224	-3.0485	-2.95395	-3.08155	-3.03659	-3.08516	0.052872	0.70336	2	2	36.598	P13686	ACP5	Tartrate-resistant acid phosphatase type 5		FQETFEDVFSDR;FVAVGDWGGVPNAPFHTAR
3.34861	3.33559	3.29279	3.29348	3.44521	3.38195	-0.0478868	0.435343	8	8	19.595	P13693;Q56UQ5;Q9HAU6	TPT1	Translationally-controlled tumor protein		DGLEMEK;DLISHDEMFSDIYK;EDGVTPYMIFFK;EIADGLCLEVEGK;GKLEEQRPER;HILANFK;LEEQRPER;VKPFMTGAAEQIK
0.898853	0.889812	0.899765	0.991356	1.16698	1.00497	-0.158292	1.31222	12	12	36.294	P13716	ALAD	Delta-aminolevulinic acid dehydratase		AAVLEAMTAFR;AVDRDVR;EALMAHGLGNR;EGADMLMVKPGMPYLDIVR;GSAADSEESPAIEAIHLLR;LAEVALAYAK;LEEMLRPLVEEGLR;MQPQSVLHSGYFHPLLR;RLEEMLRPLVEEGLR;SSPAFGDR;SSPAFGDRR;VSVMSYSAK
1.88081	1.80268	1.91412	1.93296	1.97758	1.98531	-0.099412	1.26631	22	16	70.81	P13797	PLS3	Plastin-3		AESMLQQADK;ANDDIIVNWVNR;AYFHLLNQIAPK;DELDELKEAFAK;DGETLEELMK;HVIPMNPNTDDLFK;IDINMSGFNETDDLKR;IKVPVDWSK;INNFSADIK;ISFDEFVYIFQEVK;LSPEELLLR;MDEMATTQISKDELDELKEAFAK;MINLSVPDTIDER;QFVTPADVVSGNPK;RYTLNVLEDLGDGQK;SGNLTEDDKHNNAK;TLSEAGK;VNKPPYPK;VYALPEDLVEVKPK;YAFVNWINK;YPALTKPENQDIDWTLLEGETR;YTLNVLEDLGDGQK
2.91261	2.87782	2.95845	2.92711	3.03563	2.91488	-0.0429118	0.405025	22	22	81.224	P13798	APEH	Acylamino-acid-releasing enzyme		AESFFQTK;AGGTGPGEEK;ALDVSASDDEIAR;ESPSGTMK;GDQFVFYEDWGENMVSK;GSTGFGQDSILSLPGNVGHQDVK;KAGGTGPGEEK;LLTIDQDLMVAQFSTPSLPPTLK;QDLFAVDTQVGTVTSLTAGGSGGSWK;QFLEVWEK;QVLLSEPEEAAALYR;QYLVFHDGDSVVFAGPAGNSVETR;SALYYVDLIGGK;SFNLSALEK;STHALSEVEVESDSFMNAVLWLR;TPLLLMLGQEDR;TPLLLMLGQEDRR;TVHTEWTQR;VGFLPSAGK;VLQPPPEQENVQYAGLDFEAILLQPGSPPDK;VTSVVVDVVPR;VVFDSAQR
2.2451	2.26572	2.32699	2.27835	2.38138	2.1963	-0.00607459	0.0348692	14	14	35.079	P13804	ETFA	Electron transfer flavoprotein subunit alpha, mitochondrial		AAVDAGFVPNDMQVGQTGK;ASSTSPVEISEWLDQK;DPEAPIFQVADYGIVADLFK;GLLPEELTPLILATQK;GTSFDAAATSGGSASSEK;LEVAPISDIIAIK;LGGEVSCLVAGTK;LLYDLADQLHAAVGASR;SDRPELTGAK;SPDTFVR;TIVAINKDPEAPIFQVADYGIVADLFK;VLVAQHDVYK;VVPEMTEILK;VVVSGGR
2.80717	2.79477	2.8467	2.84368	3.00667	2.84367	-0.0817919	0.654485	21	20	83.785	P13807	GYS1	Glycogen [starch] synthase, muscle		AFPEHFTYEPNEADAAQGYR;AIFATQR;FSAMHEFQNLHAQSK;GADVFLEALAR;GHFYGHLDFNLDK;IGLFNSSADR;KLYESLLVGSLPDMNK;KQLWDTANTVK;LPVATIFTTHATLLGR;LSDLLDWK;LYESLLVGSLPDMNK;MLDKEDFTMMK;QLWDTANTVK;TLDSMNSK;TLYFFIAGR;TNNFNVETLK;TQVELLEAPTPALK;TQVELLEAPTPALKR;VGGIYTVLQTK;VIFHPEFLSSTSPLLPVDYEEFVR;VTGDEWGDNYFLVGPYTEQGVR
3.77186	3.70668	3.72684	3.77106	3.78856	3.71374	-0.0226596	0.311642	21	19	45.518	P13861	PRKAR2A	cAMP-dependent protein kinase type II-alpha regulatory subunit		AASAYAVGDVK;AATIVATSEGSLWGLDR;ADEHVIDQGDDGDNFYVIER;APASVLPAATPR;DGGNQEVEIAR;GQYFGELALVTNKPR;GSFGELALMYNTPR;GTYDILVTK;IITQGEK;IVDVIGEK;KMFESFIESVPLLK;MFESFIESVPLLK;MFGSSVDLGNLGQ;NISHYEEQLVK;NLDQEQLSQVLDAMFER;QQPPDLVEFAVEYFTR;QSLGHPPPEPGPDR;SHIQIPPGLTELLQGYTVEVLR;SLEVSER;SNKDGGNQEVEIAR;SVGQYDNR
0.0486221	0.130516	-0.0854969	-0.0178432	0.269574	0.118994	-0.0923611	0.371195	12	9	46.986	P13929	ENO3	Beta-enolase		AAVPSGASTGIYEALELR;AAVPSGASTGIYEALELRDGDK;DATNVGDEGGFAPNILENNEALELLK;FMIELDGTENK;GNPTVEVDLHTAK;IEEALGDK;IGAEVYHHLK;LAMQEFMILPVGASSFK;SGETEDTFIADLVVGLCTGQIK;SPDDPAR;TAIQAAGYPDK;VVIGMDVAASEFYR
-0.365971	-0.295294	-0.45645	-0.277878	-0.286784	-0.671854	0.0396007	0.103268	3	2	171.79	P13942	COL11A2	Collagen alpha-2(XI) chain		DGPAGLR;GEVGFQGK;GLPGESGPR
2.06723	1.9938	2.00081	2.08345	2.09773	2.06454	-0.0612923	1.13965	15	15	28.38	P13984	GTF2F2	General transcription factor IIF subunit 2		DLVDITK;EHPFVLQSVGGQTLTVFTESSSDK;EIGVQNVK;GELDLTGAK;HQYYNLK;HYQGEEK;LQIEESSKPVR;LSLEGIVVQR;LSQQLDK;NTWELKPEYR;QNTGVWLVK;QPVVYLK;TEVSFTLNEDLANIHDIGGKPASVSAPR;VVTTNYKPVANHQYNIEYER;YLSQQWAK
0.185844	0.0758953	-0.0765133	0.202705	0.170918	0.0906296	-0.093009	0.487482	1	1	14.177	P13987	CD59	CD59 glycoprotein		AGLQVYNK
1.01371	0.834806	0.909336	0.550041	1.15077	0.969276	0.0292571	0.0544375	18	16	49.88	P14136	GFAP	Glial fibrillary acidic protein		ALAAELNQLR;EAASYQEALAR;ETSLDTK;FADLTDAAAR;FLEQQNK;GTNESLER;HLQEYQDLLNVK;ITIPVQTFSNLQIR;KIESLEEEIR;KLLEGEENR;LADVYQAELR;LEAENNLAAYR;LEEEGQSLKDEMAR;LEVERDNLAQDLATVR;LLEGEENR;LQDETNLR;QEADEATLAR;SVSEGHLK
1.24489	1.30448	1.35366	1.36684	1.57691	1.59082	-0.210512	1.2512	5	5	12.476	P14174	MIF	Macrophage migration inhibitory factor		IGGAQNR;LLCGLLAER;MPMFIVNTNVPR;PMFIVNTNVPR;VYINYYDMNAANVGWNNSTFA
3.9514	3.8212	3.83528	3.93943	3.96637	3.9391	-0.0790046	0.870573	23	23	59.425	P14314	PRKCSH	Glucosidase 2 subunit beta		AQQEQELAADAFK;DMEESIR;EEAEKPER;ERESLQQMAEVTR;ESLQQMAEVTR;ETMVTSTTEPSR;ILIEDWK;ILIEDWKK;KILIEDWK;KLIELQAGK;KLIELQAGKK;KSLEDQVEMLR;LGGSPTSLGTWGSWIGPDHDK;LGGSPTSLGTWGSWIGPDHDKFSAMK;LIELQAGK;LIELQAGKK;LWEEQLAAAK;MPPYDEQTQAFIDAAQEAR;NKFEEAER;SEALPTDLPAPSAPDLTEPK;SLEDQVEMLR;SLKDMEESIR;TVKEEAEKPER
2.36612	2.34765	2.33179	2.36988	2.53212	2.39305	-0.0831645	0.738809	7	7	48.275	P14324	FDPS	Farnesyl pyrophosphate synthase		ATPEQYQILK;EVLEYNAIGGK;IGTDIQDNK;KQDADSLQR;LKEVLEYNAIGGK;QDFVQHFSQIVR;VLTEDEMGHPEIGDAIAR
-3.56968	-3.6739	-3.62714	-3.79005	-3.26378	-3.69377	-0.0410417	0.0886612	3	3	58.489	P14373	TRIM27	Zinc finger protein RFP		GHSVLPLEEAVEGFK;IHIFAQK;IPEPWITPPDLQEK
0.589199	0.461407	0.456936	0.590284	0.647899	0.491831	-0.0741574	0.517492	2	2	9.3959	P14406	COX7A2	Cytochrome c oxidase subunit 7A2, mitochondrial		GGVADALLYR;LFQEDDEIPLYLK
2.31966	2.26329	2.4975	2.45146	2.41143	2.43506	-0.0725005	0.434039	7	7	33.367	P14415	ATP1B2	Sodium/potassium-transporting ATPase subunit beta-2		EFVWNPR;INAANIATDDER;INAANIATDDERDK;INAANIATDDERDKFAGR;LATPGLMIRPK;THQFMGR;YYEQPDNGVLNYPK
1.87253	2.00312	1.75799	1.78465	1.86576	1.68641	0.0989434	0.491257	22	21	136.38	P14543	NID1	Nidogen-1		AFLHVPAK;ALEGLQYPFAVTSYGK;ASLHGGEPTTIIR;EDLSPSITQR;ESHPGLFPPTFGAVAPFLADLDTTDGLGK;ETDAFQPHK;EYTVTEPER;EYTVTEPERDGASPSR;GIVTDSVR;GNLYWTDWNR;IETSYMDGTNRR;IFVGSSQVPIVFENTDLHSYVVMNHGR;KALEGLQYPFAVTSYGK;LPLEGNTMR;MVYWTDITEPSIGR;NIFWTDSNLDR;NLYFTDWK;QAEVTFVGHPGNLVIK;QDLGSPEGIAVDHLGR;VLFETDLVNPR;VYYREDLSPSITQR;YALSNSIGPVR
3.63383	3.56652	3.64265	3.64802	3.73506	3.63322	-0.057772	0.656313	19	19	36.573	P14550	AKR1A1	Aldo-keto reductase family 1 member A1		AASCVLLHTGQK;ALEALVAK;AVPREELFVTSK;AWRDPDEPVLLEEPVVLALAEK;DAGHPLYPFNDPY;DPDEPVLLEEPVVLALAEK;EELFVTSK;GDNPFPK;GLEVTAYSPLGSSDR;GLVQALGLSNFNSR;HHPEDVEPALR;HHPEDVEPALRK;KVICIPK;MPLIGLGTWK;QLNALNK;SPAQILLR;VFDFTFSPEEMK;YALSVGYR;YIVPMLTVDGK
6.92473	6.90985	6.84615	6.93452	7.02672	6.85998	-0.0468289	0.362468	48	48	57.936	P14618;P30613	PKM	Pyruvate kinase PKM		AEGSDVANAVLDGADCIMLSGETAK;AGKPVICATQMLESMIK;APIIAVTR;ASDVHEVR;ASDVHEVRK;CDENILWLDYK;DPVQEAWAEDVDLR;EAEAAIYHLQLFEELR;EAEAAIYHLQLFEELRR;FDEILEASDGIMVAR;FGVEQDVDMVFASFIR;GADFLVTEVENGGSLGSK;GADFLVTEVENGGSLGSKK;GDLGIEIPAEK;GDLGIEIPAEKVFLAQK;GDVVIVLTGWRPGSGFTNTMR;GDYPLEAVR;GIFPVLCK;GIFPVLCKDPVQEAWAEDVDLR;GSGTAEVELK;GSGTAEVELKK;GVNLPGAAVDLPAVSEK;GVNLPGAAVDLPAVSEKDIQDLK;IENHEGVR;IISKIENHEGVR;ITLDNAYMEK;I…
1.46311	1.31506	1.36818	1.43105	1.40637	1.50456	-0.0652088	0.550997	9	9	11.139	P14621	ACYP2	Acylphosphatase-2		GTVTGQVQGPEDK;IGVVGWVK;LEYSNFSIR;MYTEDEAR;MYTEDEARK;STAQSLK;SVDYEVFGR;TNFSNEK;VGSPSSR
5.36742	5.27632	5.28485	5.34567	5.51715	5.4236	-0.119278	0.972628	53	51	92.468	P14625;Q58FF3	HSP90B1	Endoplasmin		AQAYQTGK;DISTNYYASQK;EAESSPFVER;EAVEKEFEPLLNWMK;EEASDYLELDTIK;EEEAIQLDGLNASQIR;EESDDEAAVEEEEEEK;EFEPLLNWMK;EFGTNIK;EGSRTDDEVVQREEEAIQLDGLNASQIR;EGVKFDESEK;EGVKFDESEKTK;ELISNASDALDK;ELISNASDALDKIR;ESTAEKDEL;ETLQQHK;EVEEDEYK;EVEEDEYKAFYK;FAFQAEVNR;FQSSHHPTDITSLDQYVER;GLFDEYGSK;GLFDEYGSKK;GTTITLVLK;GTTITLVLKEEASDYLELDTIK;GVVDSDDLPLNVSR;IADDKYNDTFWK;IKEDEDDKTVLDLAVVLFETATLR;IYFMAGSSR;KEAESSPFVER;KIAD…
-0.337833	-0.378151	-0.405304	-0.418941	-0.208428	-0.359022	-0.0449654	0.275053	7	6	22.764	P14649	MYL6B	Myosin light chain 6B		AEPAVPQAPQK;ALGQNPTNAEVLK;GQGTYEDYLEGFR;HVLTTLGEK;RVDFETFLPMLQAVAK;TKAEPAVPQAPQK;TQEPPVDLSK
1.68934	1.69177	1.8078	1.73922	1.85118	1.73835	-0.0466166	0.358733	24	24	117.97	P14735	IDE	Insulin-degrading enzyme		AFIPQLLSR;DELKEALDDVTLPR;EALDDVTLPR;EATPYPALIK;EMLAVDAPR;ESLDDLTNLVVK;FIIQSEKPPHYLESR;GWFVYQQR;GWVNTLVGGQK;HIQALAIR;LFSEVENK;LHIEALLHGNITK;LRPENVR;MATFEIDEK;NEFIPTNFEILPLEK;NLYVTFPIPDLQK;NVPLPEFPEHPFQEEHLK;QDDKFFLPK;QEAIPDEVIK;SIEDMTEEAFQK;TKEQLGYIVFSGPR;VEAFLITMEK;VLLISDPTTDK;YTLETRPNQEGIDVR
0.585739	0.338446	0.257154	0.276999	0.344165	0.269644	0.096844	0.40393	5	5	10.192	P14854	COX6B1	Cytochrome c oxidase subunit 6B1		AEDMETK;AEGTFPGK;AEGTFPGKI;FPNQNQTR;TAPFDSR
-4.23517	-4.15525	-4.2015	-4.47548	-3.71263	-4.22052	-0.0610959	0.0970352	5	5	76.471	P14859;Q9UKI9;P09086	POU2F1;POU2F3	POU domain, class 2, transcription factor 1;POU domain, class 2, transcription factor 3		FEALNLSFK;LYGNDFSQTTISR;RIDTPSLEEPSDLEELEQFAK;TSIETNIR;WLNDAENLSSDSSLSSPSALNSPGIEGLSR
4.71061	4.62152	4.64215	4.71268	4.81453	4.87173	-0.141552	1.23694	22	21	64.132	P14866	HNRNPL	Heterogeneous nuclear ribonucleoprotein L		AITHLNNNFMFGQK;FSTPEQAAK;IEYAKPTR;ISRPGDSDDSR;LKTDNAGDQHGGGGGGGGGAGAAGGGGGGENYDDPHK;LNVCVSK;LNVFKNDQDTWDYTNPNLSGQGDPGSNPNKR;MAAAGGGGGGGR;MGPPVGGHR;NDQDTWDYTNPNLSGQGDPGSNPNK;NDQDTWDYTNPNLSGQGDPGSNPNKR;NGVQAMVEFDSVQSAQR;NPNGPYPYTLK;QPAIMPGQSYGLEDGSCSYK;QQPDEQR;QQPDEQRR;SDALETLGFLNHYQMK;SKPGAAMVEMADGYAVDR;SSSGLLEWESK;TDNAGDQHGGGGGGGGGAGAAGGGGGGENYDDPHK;TPASPVVHIR;YYGGGSEGGR
4.2245	4.1713	4.19407	4.28237	4.33522	4.31821	-0.11531	2.20445	32	32	57.136	P14868	DARS1	Aspartate--tRNA ligase, cytoplasmic		ADEVVWVR;AEDSNTHR;ALHHGIDLEK;ATVNQDTR;AYIDSFR;EAGVEMGDEDDLSTPNEK;EIMDAAEDYAK;EKYDTDFYILDK;EKYDTDFYILDKYPLAVRPFYTMPDPR;ESIVDVEGVVR;FAANINK;FGAPPHAGGGIGLER;FLEPTLR;FQTEIQTVNK;GEEILSGAQR;GFVEIQTPK;IHDPQLLTER;IISAASEGGANVFTVSYFK;IYVISLAEPR;KSQEKPR;LLGHLVK;LPLQLDDAVRPEAEGEEEGR;LQSGICHLFR;QQQFNVQALVAVGDHASK;QSNSYDMFMR;QTSMFPR;TSTSQAVFR;VFSIGPVFR;VTMLFLGLHNVR;YDTDFYILDK;YGISSMIQSQEKPDR;YPLAVRPFYTMPDPR
1.97443	1.93173	1.89222	1.92855	2.15622	1.95388	-0.0800886	0.4552	19	17	81.744	P14923	JUP	Junction plakoglobin		AAMIVNQLSK;AHQDAQR;ALMGSPQLVAAVVR;ALPELTK;EGLLAIFK;HPEAEMAQNSVR;HVAAGTQQPYTDGVR;ISEDKNPDYR;LAEPSQLLK;LLNDEDPVVVTK;LLNQPNQWPLVK;LLWTTSR;LNYGIPAIVK;LVQLLVK;NEGTATYAAAVLFR;NLSDVATK;QEGLESVLK;SAIVHLINYQDDAELATR;VSVELTNSLFK
2.18424	2.11854	2.1003	2.24676	2.23116	2.36711	-0.147316	1.37682	12	12	13.53	P14927	UQCRB	Cytochrome b-c1 complex subunit 7		ALDLNLK;DDTIYEDEDVK;DDTIYEDEDVKEAIR;EREEWAK;KEREEWAK;KWYYNAAGFNK;LPENLYNDR;QAVSASGK;RLPENLYNDR;WLDGIRK;WYYNAAGFNK;YEEENFYLEPYLK
0.345114	0.175301	0.230774	0.293468	0.320048	0.305765	-0.0560312	0.481381	12	6	84.436	P15056	BRAF	Serine/threonine-protein kinase B-raf		DQIIFMVGR;GDGGSTTGLSATPPASLPGSLTNVK;GYLSPDLSK;IGDFGLATVK;IGSGSFGTVYK;KLLFQGFR;LTQEHIEALLDK;MLNVTAPTPQQLQAFK;QTAQGMDYLHAK;SIPIPQPFRPADEDHR;SNNIFLHEDLTVK;WHGDVAVK
2.20958	2.23951	2.41137	2.43157	2.58581	2.39052	-0.182477	0.988771	11	11	42.064	P15104	GLUL	Glutamine synthetase		DIVEAHYR;GGLDNAR;LTGFHETSNINDFSAGVANR;QVYMSLPQGEK;RLTGFHETSNINDFSAGVANR;RPAETNLR;RPSANCDPFSVTEALIR;TLDSEPK;TTSASSHLNK;VQAMYIWIDGTGEGLR;YIEEAIEK
2.85429	2.82195	2.7984	2.88146	2.98534	2.8502	-0.0807842	0.854362	13	13	35.853	P15121;C9JRZ8	AKR1B1	Aldo-keto reductase family 1 member B1		AIGISNFNHLQVEMILNKPGLK;DYPFHEEF;EELFIVSK;GIVVTAYSPLGSPDRPWAKPEDPSLLEDPR;HIDCAHVYQNENEVGVAIQEK;LLLNNGAK;LREQVVK;NLVVIPK;REELFIVSK;SPPGQVTEAVK;TTAQVLIR;VAIDVGYR;VFDFELSSQDMTTLLSYNR
2.24344	2.21692	2.20375	2.23891	2.43518	2.24411	-0.0846942	0.574522	20	9	55.755	P15170	GSPT1	Eukaryotic peptide chain release factor GTP-binding subunit ERF3A		AYFETEK;AYFETEKK;DMGTVVLGK;EHAMLAK;EHVNVVFIGHVDAGK;ETWYLSWALDTNQEERDK;FTLRDEGK;GQQLVMMPNK;HFTILDAPGHK;HLIVLINK;HNVEVLGILSDDVETDTVAPGENLK;KEHVNVVFIGHVDAGK;KGEFETGFEK;KVGFNPK;MDDPTVNWSNER;STIGGQIMYLTGMVDKR;SVDGPIR;SVVAPPGAPK;TFDAQIVIIEHK;YKDMGTVVLGK
-0.581863	-0.554976	-0.722404	-0.636208	-0.38902	-0.728163	-0.0352844	0.112389	8	3	28.766	P15259	PGAM2	Phosphoglycerate mutase 2		ALPFWNEEIVPQIK;AMEAVAAQGK;ELKPTKPMQFLGDEETVR;GTEEAKR;HGEEQVK;HYGGLTGLNK;KAMEAVAAQGK;VLIAAHGNSLR
1.49808	1.48082	1.45711	1.43978	1.46494	1.40261	0.0428953	0.925845	10	9	53.588	P15289	ARSA	Arylsulfatase A;Arylsulfatase A component B;Arylsulfatase A component C		AALLTGR;AQLDAAVTFGPSQVAR;DPGENYNLLGGVAGATPEVLQALK;GGLPLEEVTVAEVLAAR;GTTYEGGVR;GYLTGMAGK;MGMYPGVLVPSSR;QSLFFYPSYPDEVR;WHLGVGPEGAFLPPHQGFHR;YMAFAHDLMADAQR
3.71172	3.64295	3.63574	3.86032	4.00597	3.87845	-0.251444	2.07915	43	28	69.412	P15311	EZR	Ezrin		AKEAQDDLVK;ALQLEEER;ALQLEEERK;APDFVFYAPR;AQEEAER;AQEEAERLEADR;DNAMLEYLK;EAQDDLVK;EDEVEEWQHR;EKEELMLR;ELSEQIQR;ENPLQFK;EVWYFGLHYVDNK;FGDYNKEVHK;FVIKPIDK;FVIKPIDKK;FYPEDVAEELIQDITQK;GFPTWLK;IAQDLEMYGINYFEIK;IDEFEAL;IGFPWSEIR;IQVWHAEHR;ITEAEKNER;KAPDFVFYAPR;KEDEVEEWQHR;KFVIKPIDK;KPDTIEVQQMK;LFFLQVK;LQDYEEK;NISFNDK;NISFNDKK;PKPINVR;QAVDQIK;QLFDQVVK;QLLTLSSELSQAR;QQLETEK;QQLETEKK;RKEDEVEEWQHR;RKPDTIEV…
-3.11578	-2.94517	-2.75891	-3.07042	-2.74674	-3.0772	0.0248318	0.0572133	11	4	56.832	P15313	ATP6V1B1	V-type proton ATPase subunit B, kidney isoform		AIVQVFEGTSGIDAR;EEVPGRR;EGALQDLAPDTAL;EHMQAVTR;GFPGYMYTDLATIYER;HVLVILTDMSSYAEALR;LALTTAEFLAYQCEK;QIYPPINVLPSLSR;RIPQAVIDEFYSR;SAIGEGMTR;TPVSEDMLGR
-0.0665092	-0.0910149	-0.133783	-0.107172	0.00302029	-0.0421829	-0.0483243	0.572805	6	6	26.182	P15374	UCHL3	Ubiquitin carboxyl-terminal hydrolase isozyme L3		FLEESVSMSPEER;FMERDPDELR;SQGQDVTSSVYFMK;VTHETSAHEGQTEAPSIDEK;WLPLEANPEVTNQFLK;YLENYDAIR
-1.77679	-1.72546	-1.88632	-1.5782	-1.60113	-1.62166	-0.195858	1.78916	2	2	68.397	P15502	ELN	Elastin		LPGGYGLPYTTGK;LPYGYGPGGVAGAAGK
2.98953	2.93196	2.86024	2.83212	2.93929	2.78045	0.0766211	0.568727	11	6	17.149	P15531	NME1	Nucleoside diphosphate kinase A		DRPFFAGLVK;EHYVDLK;FMQASEDLLK;FMQASEDLLKEHYVDLK;GDFCIQVGR;GLVGEIIK;GLVGEIIKR;NIIHGSDSVESAEK;TFIAIKPDGVQR;VMLGETNPADSKPGTIR;YMHSGPVVAMVWEGLNVVK
1.71642	1.64313	1.76742	1.6607	1.82756	1.59663	0.0140263	0.0627139	12	12	30.867	P15559	NQO1	NAD(P)H dehydrogenase [quinone] 1		ALIVLAHSER;EAAAAALK;EAAAAALKK;EGHLSPDIVAEQK;EVQDEEK;FGLSVGHHLGK;GWEVVESDLYAMNFNPIISR;IQILEGWK;IQILEGWKK;KEVQDEEK;LKDPANFQYPAESVLAYK;SIPTDNQIK
2.84816	2.51894	3.45312	3.12735	2.51757	2.46427	0.237011	0.274446	11	11	62.081	P15586	GNS	N-acetylglucosamine-6-sulfatase		AFQNVFAPR;ASILTGK;IQEPNTFPAILR;NFNIHGTNK;QLYEFDIK;RPNVVLLLTDDQDEVLGGMTPLK;RPNVVLLLTDDQDEVLGGMTPLKK;SDVLVEYQGEGR;TIDPELLGK;TQMDGMSLLPILR;WQTLLSVDDLVEK
0.376009	0.36953	0.446377	0.428728	0.619269	0.387419	-0.0811669	0.464704	11	11	46.442	P15735	PHKG2	Phosphorylase b kinase gamma catalytic chain, liver/testis isoform		ATGHEFAVK;DLKPENILLDDNMQIR;IMEVTAER;KGELFDYLTEK;LLQVDPEAR;LSPEQLEEVR;LTAEQALQHPFFER;LYGHWVK;SLLEAVSFLHANNIVHR;TLDVGPEDELPDWAAAK;VAVWTVLAAGR
0.592255	0.481012	0.601301	0.564711	0.584275	0.512186	0.00446542	0.0340951	15	14	59.687	P15848	ARSB	Arylsulfatase B		ATGVWGPWM;DGEEVATGYK;EAGYTTHMVGK;EYPHIVTK;GFDTYFGYLLGSEDYYSHER;GVGFVASPLLK;HSVPVYFPAQDPR;IELLHNIDPNFVDSSPCPR;KWSLWEGGVR;LLPQLLK;NMYSTNIFTK;SQLLTGR;TISEGSPSPR;TLWLFDIDRDPEER;WHLGMYR
3.78984	3.82971	3.71339	3.70827	3.88005	3.68359	0.0203435	0.103749	15	15	31.324	P15880	RPS2	Small ribosomal subunit protein uS5		AEDKEWMPVTK;AFVAIGDYNGHVGLGVK;ATFDAISK;ESEIIDFFLGASLK;ESEIIDFFLGASLKDEVLK;EVATAIR;GAIILAK;GCTATLGNFAK;GTGIVSAPVPK;LSIVPVR;SLEEIYLFSLPIK;SPYQEFTDHLVK;SPYQEFTDHLVKTHTR;TQAPAVATT;TYSYLTPDLWK
1.23716	1.24737	1.2695	1.21449	1.53868	1.3418	-0.113646	0.527676	12	12	53.172	P15882	CHN1	N-chimaerin		AAEYIAK;ALTLFDTDEYRPPVWK;DLPIPLITYDAYPK;EAADQLLIVAEGSYLIR;EFHGMISR;ETHDERDSTGQDGVSEK;IMDPDEQLETLHEALK;QPGTYTLALR;SPELDAMAALNDIR;SYLYQLQQEAPHPR;VSGFSDLIEDVK;YLMAHLK
-0.138725	-0.189724	-0.207298	-0.421991	-0.0918798	-0.212418	0.0635138	0.256023	5	3	71.307	P15884	TCF4	Transcription factor 4		DINEAFK;EDGVALR;GSGAAGSSQTGDALGK;GSHSLLPNQVPVPQLPVQSATSPDLNPPQDPYR;LDDAIHVLR
-2.24891	-2.49638	-2.53155	-2.2976	-2.08483	-2.37951	-0.171636	0.616877	11	11	331.77	P15924	DSP	Desmoplakin		AELIVQPELK;ALLQAILQTEDMLK;DVLDGHLR;GAGSIAGASASPK;GFFDPNTEENLTYLQLK;GLVGIEFK;GYFNEELSEILSDPSDDTK;IEVLEEELR;SVEEVASEIQPFLR;SVQNDSQAIAEVLNQLK;VLLQEEGTR
0.995514	1.02842	1.01145	0.955154	1.38384	1.01759	-0.107067	0.328652	9	9	29.247	P15927	RPA2	Replication protein A 32 kDa subunit		ANSQPSAGR;APTNIVYK;HMSVSSIK;IDDMTAAPMDVR;IGNVEISQVTIVGIIR;KSLVAFK;MWNSGFESYGSSSYGGAGGYTQSPGGFGSPAPSQAEK;QAVDFLSNEGHIYSTVDDDHFK;QWVDTDDTSSENTVVPPETYVK
-1.7939	-1.64394	-1.71784	-1.81413	-1.31895	-1.76919	-0.0844704	0.198246	2	2	7.2454	P15954	COX7C	Cytochrome c oxidase subunit 7C, mitochondrial		NLPFSVENK;SHYEEGPGK
0.383989	0.349802	0.385851	0.35647	0.438771	0.367615	-0.0144046	0.19536	6	6	24.399	P16035	TIMP2	Metalloproteinase inhibitor 2		AVSEKEVDSGNDIYGNPIKR;EVDSGNDIYGNPIK;EVDSGNDIYGNPIKR;EYLIAGK;GAAPPKQEFLDIEDP;QEFLDIEDP
0.855545	0.851748	0.877167	0.866533	1.09625	1.0173	-0.131872	0.907088	7	7	81.537	P16070	CD44	CD44 antigen		ESSETPDQFMTADETR;FAGVFHVEK;KLVINSGNGAVEDR;LVINSGNGAVEDR;NLQNVDMK;SQEMVHLVNK;YGFIEGHVVIPR
0.905277	0.906004	0.980383	0.953016	1.11887	1.03042	-0.103547	0.893982	8	8	25.918	P16083	NQO2	Ribosyldihydronicotinamide dehydrogenase [quinone]		ATDKDITGTLSNPEVFNYGVETHEAYK;LALLSVTTGGTAEMYTK;NVAVDELSR;SLASDITDEQK;SLASDITDEQKK;VLAPQISFAPEIASEEER;VLAPQISFAPEIASEEERK;VLIVYAHQEPK
3.54586	3.34293	3.41245	3.59771	3.69542	3.8485	-0.280129	1.38745	10	5	15.144	P16104	H2AX	Histone H2AX		AGLQFPVGR;ATQASQEY;HLQLAIR;HLQLAIRNDEELNK;KATQASQEY;KGHYAER;KTSATVGPK;LLGGVTIAQGGVLPNIQAVLLPK;NDEELNK;TSATVGPK
2.74961	2.75582	2.79282	2.80786	2.98443	2.83654	-0.110194	0.913112	15	13	30.375	P16152	CBR1	Carbonyl reductase [NADPH] 1		DVCTELLPLIKPQGR;EGWPSSAYGVTK;EYGGLDVLVNNAGIAFK;FHQLDIDDLQSIR;FVEDTKK;GIGLAIVR;GQAAVQQLQAEGLSPR;KEYGGLDVLVNNAGIAFK;LFSGDVVLTAR;SETITEEELVGLMNK;SPEEGAETPVYLALLPPDAEGPHGQFVSEK;SSGIHVALVTGGNK;TNFFGTR;VADPTPFHIQAEVTMK;VVNVSSIMSVR
-0.0588818	0.0918808	-0.0999413	-0.16572	0.316869	-0.148672	-0.0231396	0.0470075	21	17	206.26	P16157	ANK1	Ankyrin-1		AGHTEVAK;EGHVETVLALLEK;EIILETTTK;EPGGSLSFLR;FLLQHQADVNAK;GFTPLHVAAK;ISEILLDHGAPIQAK;KGFTPLHVAAK;KGNTALHIAALAGQDEVVR;LGYISVTDVLK;LLGNQATFSPIVTVEPR;LPALHIAAR;LSTPPPLAEEEGLASR;LVPLVQATFPENAVTK;MVVELLHK;RGNVIMVR;TAAVLLQNDPNPDVLSK;TAEAVNFATLLYK;TLEQHENFVEVAR;VMELLLK;VVTDETSFVLVSDK
0.660482	0.731024	0.753361	0.794628	0.881516	0.729528	-0.0869354	0.767105	9	9	44.297	P16219	ACADS	Short-chain specific acyl-CoA dehydrogenase, mitochondrial		DSILGEPGMGFK;ELFPIAAQVDK;ELFPIAAQVDKEHLFPAAQVK;GISAFLVPMPTPGLTLGK;ITEIYEGTSEIQR;LADMALALESAR;LQVIQFK;LVIAGHLLR;MAFGAPLTK
0.396252	0.397184	0.459442	0.406027	0.639543	0.493223	-0.0953048	0.598452	4	2	35.136	P16220	CREB1	Cyclic AMP-responsive element-binding protein 1		ILNDLSSDAPGVPR;TAPTSTIAPGVVMASSPALPTQPAEEAAR;TLIEELK;VAVLENQNK
-4.02351	-3.94434	-3.96667	-4.201	-3.64428	-4.09742	0.00272783	0.00517938	2	2	36.223	P16260	SLC25A16	Solute carrier family 25 member 16		GEHSYTGIIHAFK;MQLGTVLPEFEK
2.90364	2.811	2.85335	2.79229	2.8067	2.76355	0.0684811	1.08671	14	14	76.074	P16278	GLB1	Beta-galactosidase		AGATLDLLVENMGR;AYVAVDGIPQGVLER;GPLINSEFYTGWLDHWGQPHSTIK;HHLGDDVVLFTTDGAHK;MFEIDYSR;QHYGFVLYR;SLYPLTFIQVK;SSDPDYLAAVDK;TEAVASSLYDILAR;TVGAALDILCPSGPIK;VNYGAYINDFK;VPEGPIPPSTPK;WLGVLLPK;YISGSIHYSR
0.209654	0.173111	0.202759	0.240122	0.319921	0.186832	-0.0537837	0.597632	15	8	59.024	P16298	PPP3CB	Serine/threonine-protein phosphatase 2B catalytic subunit beta isoform		AHEAQDAGYR;AVPFPPTHR;EESESVLTLK;GFSPPHR;GLTPTGMLPSGVLAGGR;HLTEYFTFK;IINEGAAILR;ILYPSTLFLLR;LFEVGGSPANTR;LTSEEVFDLDGIPR;QTLQSATVEAIEAEK;VDEEIALR;VFSVLREESESVLTLK;YENNVMNIR;YLFLGDYVDR
0.962448	0.908707	0.903894	0.892258	1.09728	1.02203	-0.0788374	0.556976	16	15	42.864	P16333	NCK1	SH2/SH3 adapter protein NCK1		AEEVVVVAK;APIFTSEQGEK;DSESSPNDFSVSLK;EDELSLIK;FAGNPWYYGK;FDYVAQQEQELDIK;FDYVAQQEQELDIKK;FNYMAEREDELSLIK;FSTMEELVEHYK;GHEGDFLIR;KAPIFTSEQGEK;KFSTMEELVEHYK;LWLLDDSK;LYDLNMPAYVK;RKPSVPDSASPADDSFVDPGER;TGFVPSNYVER
-3.56859	-3.32734	-3.36367	-3.58629	-3.11354	-3.43867	-0.0403636	0.0906553	10	10	89.384	P16383	GCFC2	Intron Large complex component GCFC2		ALNQAESFIGEHHLDHLK;AQVAGLPHR;AVEDDVFIPLYPK;ELPVPGSAEEEPPSGGGR;IPDAAFIQAAR;LLNPLIR;LTLLQETHR;TQWILEEIESR;VLSAIINK;VQLIDWNPLK
4.72118	4.61257	4.50222	4.66301	4.85882	4.74722	-0.144361	0.784202	20	14	22.58	P16401	H1-5	Histone H1.5		AAGAGAAK;AASGEAKPK;AKKPAAAGVK;AKKPAGATPK;ALAAGGYDVEK;ALAAGGYDVEKNNSR;ATGPPVSELITK;AVAASKER;GTGASGSFK;GTLVQTK;KAAGAGAAK;KAASGEAKPK;KALAAGGYDVEK;KATGPPVSELITK;KPAAAGVK;KPAGATPK;NGLSLAALK;NGLSLAALKK;SETAPAETATPAPVEK;SLVSKGTLVQTK
2.49821	2.44826	2.39068	2.53955	2.77634	2.70603	-0.228255	1.38699	23	8	22.35	P16402	H1-3	Histone H1.3		AASGEGKPK;AGAAKPR;AGATAGK;AGATAGKR;ALAAAGYDVEK;ALAAAGYDVEKNNSR;ASGPPVSELITK;ASGPPVSELITKAVAASKER;AVAASKER;GTGASGSFK;GTLVQTK;KAASGEGKPK;KAGATAGK;KALAAAGYDVEK;KASGPPVSELITK;KPAGAAK;KPATAAGTKK;KVAGAATPK;SETAPLAPTIPAPAEK;SGVSLAALK;SGVSLAALKK;SLVSKGTLVQTK;VAGAATPK
5.88548	5.74442	5.61836	5.8767	5.94189	5.83463	-0.134987	0.744423	24	10	21.364	P16403	H1-2	Histone H1.2		AAGGATPK;AASGEAKPK;AGGTKPK;AKKPAAATVTK;ALAAAGYDVEK;ALAAAGYDVEKNNSR;ASGPPVSELITK;ASGPPVSELITKAVAASKER;AVAASKER;GTGASGSFK;GTLVQTK;KAAGGATPK;KAASGEAKPK;KAGGTKPK;KAGGTPR;KALAAAGYDVEK;KASGPPVSELITK;KPAAATVTK;KPAAATVTKK;KPVGAAK;SETAPAAPAAAPPAEK;SGVSLAALK;SGVSLAALKK;SLVSKGTLVQTK
-1.20619	-1.28281	-1.43985	-1.26941	-1.1474	-1.31978	-0.0640796	0.304261	3	3	34.932	P16422	EPCAM	Epithelial cell adhesion molecule		EKPYDSK;GESLFHSK;TQNDVDIADVAYYFEK
3.04585	2.98866	3.22328	3.15094	3.08556	2.9879	0.0111322	0.0447078	30	30	76.689	P16435	POR	NADPH--cytochrome P450 reductase		AKEPAGENGGR;ALVPMFVR;ATTPVIMVGPGTGVAPFIGFIQER;DGALTQLNVAFSR;DVQNTFYDIVAELGAMEHAQAVDYIK;EELAQFHR;EEVPEFTK;ESSFVEK;FAVFGLGNK;GVATNWLR;HLMHLELDISDSK;IQTLTSSVR;KEEVPEFTK;LEQLGAQR;MASSSGEGK;NIIVFYGSQTGTAEEFANR;NPFLAAVTTNR;QDREHLWK;QYELVVHTDIDAAK;RLEQLGAQR;RSDEDYLYR;RSDEDYLYREELAQFHR;SDEDYLYREELAQFHR;SYENQKPPFDAK;TALTYYLDITNPPR;TNVLYELAQYASEPSEQELLR;TYEHFNAMGK;VYVQHLLK;YESGDHVAVYPANDSALVNQLGK;YYSIASSSK
-3.34914	-3.38712	-3.41072	-3.50188	-2.87538	-3.24501	-0.174901	0.405994	3	3	21.646	P16455	MGMT	Methylated-DNA--protein-cysteine methyltransferase		EWLLAHEGHR;FGEVISYQQLAALAGNPK;LGKPGLGGSSGLAGAWLK
-2.13937	-2.12935	-2.12095	-2.03178	-2.12077	-2.10643	-0.0435642	0.707898	9	2	99.546	P16499	PDE6A	Rod cGMP-specific 3,5-cyclic phosphodiesterase subunit alpha		EEIVGVATFYNR;GEVTAEEVEK;GTNNLYQMK;HHLEFGK;KEEIVGVATFYNR;LHGSSILER;SQNPLAK;VFEELTDIER;VIDYILHGK
3.46476	3.56919	3.61062	3.55205	3.85132	3.51231	-0.0903692	0.320978	14	11	37.221	P16520	GNB3	Guanine nucleotide-binding protein G(I)/G(S)/G(T) subunit beta-3		ACADVTLAELVSGLEVVGR;FLDDNNIVTSSGDTTCALWDIETGQQK;GEMEQLR;GEMEQLRQEAEQLK;GEMEQLRQEAEQLKK;IYAMHWATDSK;KACADVTLAELVSGLEVVGR;LIVWDSYTTNK;LLVSASQDGK;QEAEQLK;QEAEQLKK;QIADARK;VGILSGHDNR;VHAIPLR
3.92397	3.91097	3.93126	4.00099	4.08393	3.97425	-0.0976559	1.36019	39	24	114.76	P16615;Q93084	ATP2A2	Sarcoplasmic/endoplasmic reticulum calcium ATPase 2		AEIGIAMGSGTAVAK;AIYNNMK;AKDIVPGDIVEIAVGDK;AKDIVPGDIVEIAVGDKVPADIR;AMGVVVATGVNTEIGK;ANACNSVIK;AVNQDKK;DIVPGDIVEIAVGDK;DIVPGDIVEIAVGDKVPADIR;EEMHLEDSANFIK;EFDELNPSAQR;EFTLEFSR;EWGSGSDTLR;EYEPEMGK;GAPEGVIDR;HTDPVPDPR;IEVASSVK;IGIFGQDEDVTSK;IRDEMVATEQER;ISLPVILMDETLK;IVEFLQSFDEITAMTGDGVNDAPALK;IVEFLQSFDEITAMTGDGVNDAPALKK;KAEIGIAMGSGTAVAK;KEFTLEFSR;LDEFGEQLSK;MENAHTK;MNVFDTELK;NAENAIEALK;NAENAIEALKEYE…
2.69089	2.62287	2.62874	2.65662	2.71361	2.65184	-0.0265188	0.37803	20	20	53.15	P16870	CPE	Carboxypeptidase E		AASQPGELK;AASQPGELKDWFVGR;EGGPNNHLLK;ELLVIELSDNPGVHEPGEPEFK;IHIMPSLNPDGFEK;IVDQNTK;IVYVNEK;KIVDQNTK;KVAVPYSPAAGVDFELESFSER;LLIPGNYK;LQQEDGISFEYHR;LTASAPGYLAITK;NFPDLDR;NSLISYLEQIHR;SGSAHEYSSSPDDAIFQSLAR;SNAQGIDLNR;TYWEDNK;TYWEDNKNSLISYLEQIHR;VAVPYSPAAGVDFELESFSER;YIGNMHGNEAVGR
-0.400652	-0.522278	-0.365309	-0.538864	-0.396171	-0.414116	0.020304	0.112592	6	6	46.374	P16930	FAH	Fumarylacetoacetase		ASSVVVSGTPIR;HLFTGPVLSK;SFIPVAEDSDFPIHNLPYGVFSTR;VFLQNLLSVSQAR;VLPALLPS;WEYVPLGPFLGK
4.43335	4.21124	4.24635	4.41614	4.53333	4.46247	-0.173667	1.06131	24	17	17.302	P16949;REV__P36956	STMN1	Stathmin		ASGQAFELILSPR;ASSDIQVK;DKHIEEVR;DKHIEEVRK;DLSLEEIQK;DLSLEEIQKK;DPADETEAD;EAQMAAK;EHEKEVLQK;EKDKHIEEVR;ESKDPADETEAD;ESVPEFPLSPPK;HIEEVRK;KDLSLEEIQK;KLEAAEER;KLEAAEERR;KSHEAEVLK;LEAAEER;LEAAEERR;MASSDIQVK;NKESKDPADETEAD;REHEKEVLQK;SHEAEVLK;SKESVPEFPLSPPK
0.444267	0.455864	0.457251	0.290133	0.564477	0.378677	0.041365	0.19638	9	6	40.089	P16989	YBX3	Y-box-binding protein 3		AGEAPTENPAPPTQQSSAE;DGVPEGAQLQGPVHR;EDVFVHQTAIK;GAEAANVTGPDGVPVEGSR;IQAGEIGEMKDGVPEGAQLQGPVHR;NDTKEDVFVHQTAIK;SEAGEATTTTTTTLPQAPTEAAAAAPQDPAPK;SVGDGETVEFDVVEGEK;VLPHPNR
-1.26806	-1.06793	-1.23821	-1.23819	-0.806945	-1.34421	-0.0616191	0.128702	3	3	90.521	P17010;P08048;Q9Y462	ZFX;ZFY	Zinc finger X-chromosomal protein;Zinc finger Y-chromosomal protein		EVQQHALIHQESK;HLLAVHSK;IADPFVLSR
-0.0178394	-0.0501308	-0.115265	-0.130152	0.152911	0.123688	-0.109894	0.510337	4	4	25.915	P17026	ZNF22	Zinc finger protein 22		QSSNLIQHQR;SFFQSSNLIQHR;SLDDKPYK;THLPSWK
-1.77587	-1.70922	-1.65532	-1.69016	-1.64405	-1.59935	-0.0689516	0.723342	6	5	42.155	P17028	ZNF24	Zinc finger protein 24		EAVSQLR;LWLRPETHTK;SAQSVEEDSILIIPTPDEEEK;SYSQSSNLFR;VHTGEKPYK;VKLEEDPDGEEGSSIPWNHLPDPEIFR
2.96102	2.82913	2.92366	2.98215	2.93469	2.95984	-0.0542974	0.582412	8	8	46.564	P17050	NAGA	Alpha-N-acetylgalactosaminidase		AQMALWTVLAAPLLMSTDLR;FPHGIPFLADYVHSLGLK;INQDPLGIQGR;LDGCFSTPEER;MAQDGWR;SLIEVYMRPLSNK;TISAQNMDILQNPLMIK;VVQDAQTFAEWK
1.39201	1.27853	1.29468	1.37606	1.54377	1.45682	-0.137141	1.0742	10	1	71.027	P17066;P48741	HSPA6;HSPA7	Heat shock 70 kDa protein 6;Putative heat shock 70 kDa protein 7		ATAGDTHLGGEDFDNR;DNNLLGR;FEELCSDLFR;IINEPTAAAIAYGLDR;ITITNDK;ITITNDKGR;LLQDFFNGK;STLEPVEK;TTPSYVAFTDTER;VEILANDQGNR
3.01876	2.84433	2.85233	2.91319	2.98134	2.89144	-0.0235154	0.137988	9	9	11.676	P17096	HMGA1	High mobility group protein HMG-I/HMG-Y		EPSEVPTPK;KLEKEEEEGISQESSEEEQ;KQPPVSPGTALVGSQK;KTTTTPGR;QEKDGTEK;QPPVSPGTALVGSQK;SESSSKSSQPLASK;SSQPLASK;TTTTPGR
-4.51425	-4.53311	-4.61616	-4.50537	-4.19703	-4.47579	-0.161777	0.71745	2	2	21.541	P17152	TMEM11	Transmembrane protein 11, mitochondrial		IGDETAR;LPLHTLTSSTPVVLVR
4.01423	3.95498	3.99101	4.03086	4.10721	3.99393	-0.0572608	0.69479	26	26	46.247	P17174	GOT1	Aspartate aminotransferase, cytoplasmic		APPSVFAEVPQAQPVLVFK;EPESILQVLSQMEK;FLFPFFDSAYQGFASGNLER;HIYLLPSGR;IANDNSLNHEYLPILGLAEFR;IGADFLAR;INVSGLTTK;ITWSNPPAQGAR;IVASTLSNPELFEEWTGNVK;KVNLGVGAYR;LALGDDSPALK;LALGDDSPALKEK;LTADFREDPDPR;MAPPSVFAEVPQAQPVLVFK;NFGLYNER;NLDYVATSIHEAVTK;NTPVYVSSPTWENHNAVFSAAGFK;QIASVMK;QVEYLVNEK;TDDCHPWVLPVVK;TPGTWNHITDQIGMFSFTGLNPK;VGGVQSLGGTGALR;VGNLTVVGK;VGNLTVVGKEPESILQVLSQMEK;VNLGVGAYR;YWDAEKR
1.72087	1.66483	1.66012	1.70409	1.94466	1.73392	-0.112285	0.649176	16	14	76.749	P17252	PRKCA	Protein kinase C alpha type		ADVFPGNDSTASQDVANR;AEVADEK;EHMMDGVTTR;EIQPPFKPK;GAENFDK;GAENFDKFFTR;GTEELYAIK;KQPSNNLDR;LDNVMLDSEGHIK;LGPAGNK;LLNQEEGEYYNVPIPEGDEEGNMELR;LSVEIWDWDR;LTDFNFLMVLGK;MPASGWYK;STLNPQWNESFTFK;VISPSEDR
-0.510212	-0.414314	-0.379574	-0.406975	-0.0598402	-0.3901	-0.149062	0.552019	11	11	129.29	P17301	ITGA2	Integrin alpha-2		AIASIPTER;EGILGQHQFLEGPEGIENTR;FVQGLDIGPTK;GNWLLVGSPWSGFPENR;IGQTSSSVSFK;IPLLYDAEIHLTR;KYAYSAASGGR;STNINFYEISSDGNVPSIVHSFEDVGPK;VDISLENPGTSPALEAYSETAK;VFSIPFHK;VYLFTIK
-2.64456	-2.63865	-2.91236	-2.73642	-2.45826	-2.6716	-0.109764	0.372903	3	3	43.008	P17302	GJA1	Gap junction alpha-1 protein		GDWSALGK;ILLLGTAVESAWGDEQSAFR;YGIEEHGK
-0.125164	-0.169638	-0.251236	-0.165623	-0.198606	-0.174984	-0.00227515	0.0198322	7	7	69.935	P17405	SMPD1	Sphingomyelin phosphodiesterase;Sphingomyelin phosphodiesterase, processed form		ALTTVTALVR;AWEPWLPAEALR;ETYGLPNTLPTAWHNLVYR;GLFTAINLGLK;IGGFYALSPYPGLR;VGSVAIK;WLYEAMAK
3.21526	3.14291	3.19547	3.17006	3.32459	3.28202	-0.0743418	0.66181	32	32	89.405	P17480	UBTF	Nucleolar transcription factor 1		AEEIWQQSVIGDYLAR;AMEMTWNNMEK;APPAATNSSK;DVPSTER;DYEVELLR;EKDAYHK;FLESLPEEEQQR;FREDHPDLIQNAK;HPELNISEEGITK;KAAEDQK;KDYEVELLR;KHPDFPK;KLAEEQQK;KPAQEGGK;KPLTPYFR;LAEEQQK;LHPEMSNLDLTK;MLNINKK;MWNDLSEK;QATSPASK;QLQEERPELSESELTR;RAEEIWQQSVIGDYLAR;RPVSAMFIFSEEK;SDIPEKPK;SLSPQDR;TLTELILDAQEHVK;TPQQLWYTHEK;TTESHMDWEK;VHLDLWVK;VRPDATTK;WVEISNEVR;YIQDFQR
-2.05925	-2.05958	-2.14558	-2.32224	-1.77335	-1.97865	-0.063391	0.144707	3	2	25.432	P17509;P17482;P20719;P09629;P28356;P31268;P09630;P31274;Q00444;P31267	HOXB6	Homeobox protein Hox-B6		LLSASQLSAEEEEEKQAE;SVFGETEEQK;YQTLELEK
-3.84844	-3.70903	-2.80247	-3.48125	-3.8146	-4.21303	0.382977	0.418015	4	4	35.173	P17535;P17275;P05412	JUND	Transcription factor JunD		ADGAPSAAPPDGLLASPDLGLLK;ALEDLHK;EQVAQLK;VAASEEQEFAEGFVK
1.3989	1.51962	1.5448	1.35241	1.70122	1.31066	0.0330089	0.0891042	21	20	74.111	P17600	SYN1	Synapsin-1		ASGAPPGGQQR;DHIIEVVGSSMPLIGDHQDEDK;EMLSSTTYPVVVK;GSHGQTPSPGALPLGR;IHGEIDIK;KLGTEEFPLIDQTFYPNHK;LGTEEFPLIDQTFYPNHK;LPSPTSAPQQPASQAAPPTQGQGR;MGHAHSGMGK;QAGPPQATR;QASQAGPVPR;QTSVSGPAPPK;QTTAAAAATFSEQVGGGSGGAGR;SFASLFSD;SQSLTNAFNLPEPAPPRPSLSQDEVK;SSGVAPAASPAAPSPGSSGGGGFFSSLSNAVK;TSVSGNWK;TYATAEPFIDAK;VDNQHDFQDIASVVALTK;VKVDNQHDFQDIASVVALTK;VLLVIDEPHTDWAK
3.3141	3.20491	3.24186	3.28035	3.33061	3.33265	-0.0609153	0.772112	24	10	40.589	P17612	PRKACA	cAMP-dependent protein kinase catalytic subunit alpha		AKEDFLK;DNSNLYMVMEYVPGGEMFSHLR;ETGNHYAMK;FKGPGDTSNFDDYEEEEIR;FPSHFSSDLK;FPSHFSSDLKDLLR;FSEPHAR;GPGDTSNFDDYEEEEIR;GSEQESVK;HKETGNHYAMK;ILQAVNFPFLVK;KGSEQESVK;KVEAPFIPK;KWESPAQNTAHLDQFER;LKQIEHTLNEK;NGVNDIK;NLLQVDLTK;NLLQVDLTKR;QIEHTLNEK;QIEHTLNEKR;TLGTGSFGR;VEAPFIPK;WESPAQNTAHLDQFER;WFATTDWIAIYQR
1.93188	1.75871	1.79867	1.77761	1.90596	1.86317	-0.0191622	0.107186	17	17	79.994	P17655	CAPN2	Calpain-2 catalytic subunit		ALEEAGFK;DGELLFVHSAEGSEFWSALLEK;EFYILWTK;ELGPYSSK;FADDQLIIDFDNFVR;FKLPPGEYILVPSTFEPNK;IMVDMLDSDGSGK;KADYQAVDDEIEANLEEFDISEDDIDDGFRR;KALEEAGFK;LEICNLTPDTLTSDTYKK;LFAQLAGEDAEISAFELQTILR;LPPGEYILVPSTFEPNK;NFFLTNR;NPWGEVEWTGR;NYPNTFWMNPQYLIK;SDTFINLR;YLNQDYEALR
2.37775	2.20886	1.95935	1.79884	2.30539	2.44853	-0.00226307	0.0031952	30	25	53.535	P17661	DES	Desmin		ADVDAATLAR;AQYETIAAK;DGEVVSEATQQQHEVL;DNLLDDLQR;ETSPEQR;EYQDLLNVK;FASEASGYQDNIAR;GSEVHTK;GSSSSVTSR;GTNDSLMR;HLKDEMAR;IESLNEEIAFLK;INLPIQTYSALNFR;KLLEGEESR;KVHEEEIR;LLEGEESR;LQEEIQLK;LQEEIQLKEEAENNLAAFR;NISEAEEWYK;QVEVLTNQR;RIESLNEEIAFLK;TFGGAPGFPLGSPLSSPVFPR;TNEKVELQELNDR;TPSSYGAGELLDFSLADAVNQEFLTTR;TSGGAGGLGSLR;VAELYEEELR;VDVERDNLLDDLQR;VELQELNDR;VHEEEIR;VSDLTQAANK
2.60731	2.292	2.07995	2.20347	2.31387	2.18908	0.0909478	0.224651	19	19	24.802	P17677	GAP43	Neuromodulin		AEDAPAK;AEDAPAKEEPK;AGETPSEEK;AGSAETESATK;ASTDNSPSSK;ATAQPPTETGESSQAEENIEAVDETKPK;DDVQAAEAEANK;DEAPVADGVEK;GEGDAATEQAAPQAPASSEEK;GEGTTTAEAAPATGSKPDEPGK;IEQDGIKPEDK;KDDVQAAEAEANK;KDDVQAAEAEANKK;KDEAPVADGVEK;KGEGDAATEQAAPQAPASSEEK;KGEGTTTAEAAPATGSKPDEPGK;NDDDQKIEQDGIKPEDK;QADVPAAVTAAAATTPAAEDAAAK;QDEGKEEEPEADQEHA
-1.91316	-2.14957	-2.21373	-2.383	-2.43051	-2.21024	0.249096	1.03266	2	1	38.224	P17693	HLA-G	HLA class I histocompatibility antigen, alpha chain G;Soluble HLA class I histocompatibility antigen, alpha chain G		DYLALNEDLR;WAAVVVPSGEEQR
-1.77191	-1.73693	-1.68699	-1.76159	-1.7921	-1.8103	0.0560484	0.920398	5	4	48.473	P17706	PTPN2	Tyrosine-protein phosphatase non-receptor type 2		EDLSPAFDHSPNK;LLSEDVK;LQNAENDYINASLVDIEEAQR;SYYTVHLLQLENINSGETR
[truncated: 5,612 more rows]

## Sheet: DEP (PRPF31-AAV vs GFP-AAV)
Differentially expressed proteins between PRPF31.AAV and GFP.AAV retinal organoids (padj-value < 0.05; log2 fold change (LFC) ≤ -0.26 for downregulated proteins; upregulated proteins LFC ≥ 0.26))
[truncated: 47 more rows]

[truncated: 2 more sheets: GOBP (PRPF31- vs GFP-AAV), GOCC (PRPF31- vs GFP-AAV)]
